# Supplementary material for: Centromere protection requires strict mitotic inactivation of the Bloom syndrome helicase complex
Source: Research Square preprint supplement (doi:10.21203/rs.3.rs-4420374/v1), 2024-05-30
Supplement: Supplementary file 1 [file Fig 1A, S1A, S4AB. Mitotic pulldowns BLM TOP3A PICH interaction in mitosis.xlsx]

## Sheet: 20210214 Graph
	20210214	HeLa vs GFP TOP3A Co-IP
	GFP	BLM	BLM/TOP3A
HeLa	6117.42	2140.94	0.349974
HeLa NOC	18562.6	4279.42	0.23054
GFP TOP3A	68066.7	84483.8	1.24119
GFP-TOP3A NOC	31972.8	75750.5	2.36922

## Sheet: 20210226 graph
	20210226	Co-IP HeLa GFP-TOP3A
	GFP-TOP3A	BLM	BLM/TOP3A
150mM	53736.3	69040.5	1.2848	1	UT
300mM	66165.2	63536.2	0.960266	0.747404
500mM	59514.2	44403.8	0.746104	0.580715
650mM	51517.1	21092.7	0.409431	0.318673
150mM	47398.2	53049.1	1.11922	1	NOC
300mM	51003.1	16871.7	0.330798	0.29556
500mM	53686.8	5984.1	0.111463	0.0995899
650mM	51329.5	2022.7	0.0394062	0.0352086

## Sheet: 20210413 Graph
		GFP-TOP3A	BLM	BLM/TOP3A	Noc
	150mM	56768.2	86440.7	1.5227	-
	NOC 150mM	99724.1	43448.2	0.435684	+
	350mM	44704.9	69003.8	1.54354	-
	NOC 350mM	100336	3673.97	0.0366165	+
	500mM	40197.2	22211.3	0.552559	-
	NOC 500mM	70278.8	4674.2	0.0665094	+

## Sheet: 20210421 graph
	HeLa GFP TOP3A GFP-trap / BLM (BethylLab) ImageQuant_LAS4000
						GFP-TOP3A	BLM	BLM/TOP3A
	Untreated	150mM	20210421_Co-IP_GFPTOP3AvsEndoBLM_Maria.tif			377311	736752	1.95264
		300mM	20210421_Co-IP_GFPTOP3AvsEndoBLM_Maria.tif			414880	745059	1.79584
		450mM	20210421_Co-IP_GFPTOP3AvsEndoBLM_Maria.tif			417920	726235	1.73774
	Nocodazole (16h)	150mM	20210421_Co-IP_GFPTOP3AvsEndoBLM_Maria.tif			1033925	341441	0.330238
		300mM	20210421_Co-IP_GFPTOP3AvsEndoBLM_Maria.tif			948456	321176	0.33863
		450mM	20210421_Co-IP_GFPTOP3AvsEndoBLM_Maria.tif			917445	179293	0.195426
	Fiji Steps	>Open File > 16-bit
		>Edit>Invert (Black background, white bands)
		>Analyse>Set Measurements>Integrated Density
		>Exact square on individual bands (same size square/band)>Analyse>Measure
		Integrated density	sum of all the pixel intensities in the ROI
			GFP-TOP3A	BLM	BLM/TOP3A
	Untreated	150mM	21220.9	104283	4.91419
		300mM	28089.8	89476.8	3.18538
		450mM	33548.7	65221.2	1.94407
	Nocodazole (16h)	150mM	88256.5	60135.8	0.681376
		300mM	89755.6	57598.1	0.641721
		450mM	93310.3	51544.2	0.552396
	Fiji Steps	>Open File >RGB
		>Edit>Transform>Rotate>All bands in line
		>Rectangle around all bands
		>Analyze>Gels>Select first lane
		>Analyse>Gels>Plot lane
		>Isolate individual peak with line tool
		>Select each peak with wand tool>Results

## Sheet: 20210504 HeLa pSBGFPTOP3A
			GFP-TOP3A	BLM	BLM/TOP3A
	Untreated	150mM	621472	968498	1.55839
		300mM	594483	1074987	1.80827
		450mM	531255	622569	1.17188
	Nocodazole (16h)	150mM	861966	112979	0.131071
		300mM	1134519	105673	0.0931434
		450mM	516975	51151	0.0989429

## Sheet: Fig1, S1RPE1 PICHmClover IP BLM
			IP: 𝛼BLM
Fig 1A	Exp1		BLM	PICHmClover	TOP3A	PICH/BLM	TOP3A/BLM	PICH/BLM	TOP3A/BLM
		MG132	70169.1	22287.4	32712.8	0.317624	0.466199	1	1
		MG132 + PLK1i	66165.2	56966.5	54757.5	0.860974	0.827588	2.71067	1.77518
			IP: 𝛼BLM
Fig S1A	Exp3		BLM	PICHmClover	TOP3A	PICH/BLM	TOP3A/BLM	PICH/BLM	TOP3A/BLM
		MG132	63403.9	10522.3	64696.7	0.165957	1.02039	1	1
		MG132 + PLK1i	62513.8	62782.6	98954.3	1.0043	1.58292	6.05156	1.55129

## Sheet: FigS4A Endogenous BLM, TOP3A x3
	U2OS							HeLa
			IP: 𝛼BLM							IP: 𝛼BLM
			BLM	TOP3A	TOP3A/BLM	Normalise				BLM	TOP3A	TOP3A/BLM
	Untreated	150mM	92627	97173	1.04908	1		Untreated	150mM	77488.1	94366.3	1.21782	1
		350mM	87826	69936.5	0.796307	0.759055			350mM	68238.3	65146.9	0.954696	0.783941
	Noc	150mM	69657.1	33021.2	0.474054	0.451877		Noc	150mM	75024.6	48939.1	0.652308	0.535637
		350mM	71358.1	21619.3	0.302969	0.288795			350mM	58153.4	19527.6	0.335794	0.275734
			BLM	TOP3A	TOP3A/BLM
	Untreated	150mM	24296.1	30026.2	1.23584	1		Untreated	150mM	1
		350mM	31945.4	29405	0.920477	0.744818			350mM	0.762604
	Noc	150mM	37072.1	16953.2	0.457302	0.370033		Noc	150mM	0.452516
		350mM	29948	9690.87	0.32359	0.261837			350mM	0.275456

## Sheet: FigS4B HeLa EGFPTOP3A  BLM
	HeLa GFP-TOP3A
			IP: 𝛼GFP-trap
			GFP-TOP3A	BLM	BLM/TOP3A
	Untreated	150mM	1615180	1607409	0.995189	1			Untreated	150mM	1
		300mM	1528840	1451817	0.94962	0.954211				300mM	0.616391
		450mM	1210496	1128964	0.932646	0.937155				450mM	0.548956
	Nocodazole (16h)	150mM	1244253	990121	0.795755	0.799602			Nocodazole	150mM	0.329233
		300mM	1315021	856148	0.651053	0.6542				300mM	0.262726
		450mM	979152	387311	0.395558	0.39747				450mM	0.163394
			IP: 𝛼GFP-trap
			GFP-TOP3A	BLM	BLM/TOP3A
	Untreated	150mM	7421.47	22309.7	3.0061	1
		300mM	8933.71	24034.7	2.69034	0.894961
		450mM	9705.08	20705.4	2.13347	0.709712
	Nocodazole (16h)	150mM	22042	12463.4	0.565441	0.188098
		300mM	21234.6	8552.15	0.402747	0.133977
		450mM	20439.4	5696.45	0.278699	0.0927111
