# Supplementary material for: Centromere protection requires strict mitotic inactivation of the Bloom syndrome helicase complex
Source: Research Square preprint supplement (doi:10.21203/rs.3.rs-4420374/v1), 2024-05-30
Supplement: Supplementary file 4 [file Fig 1C. RPE1_siSGO1 vs UFBs_ab2179.xlsx]

## Sheet: Fig 1C_siSGO1 UFB intensity 
	Exp 2023-02-09 RPE1 siCTRL vs siSGO1							1.27772								1.87323
												Normalised Early					Normalised Early
	Early Anaphase UFBs		Mid/Late Anaphase UFBs		siSGO1 Pre-UFBs			Early Anaphase UFBs	Mid/Late Anaphase UFBs	siSGO1 Pre-UFBs		Early Anaphase UFBs	Mid/Late Anaphase UFBs	siSGO1 Pre-UFBs		Early Anaphase UFBs	Mid/Late Anaphase UFBs	siSGO1 Pre-UFBs
	PICH	BLM	PICH	BLM	PICH	BLM		BLM/PICH	BLM/PICH	BLM/PICH		BLM/PICH	BLM/PICH	BLM/PICH		BLM/PICH	BLM/PICH	BLM/PICH
	1253.9	1203.4	6502.2	10167.5	1798.4	0		0.959726	1.5637	0		0.751121	1.22382	0		0.512338	0.834763	0
	2016.5	3401.9	5241.2	6802.4	3623.9	2204.2		1.68703	1.29787	0.60824		1.32034	1.01577	0.476034		0.900602	0.692853	0.324702
	1967.2	3108.2	4645.1	10030.1	3140.5	1252.8		1.58001	2.15929	0.398917		1.23658	1.68995	0.312209		0.843471	1.15271	0.212957
	1836.3	3248.1	4151	10441.2	4356.9	3852.9		1.76883	2.51535	0.884321		1.38436	1.96861	0.692107		0.944268	1.34279	0.472084
	2571	4685.5	5963.9	12553.8	3214.1	2154.7		1.82244	2.10496	0.67039		1.42632	1.64743	0.524675		0.972889	1.12371	0.35788
	3154.9	3813.1	5164.8	9358.9	3211.9	2385.8		1.20863	1.81205	0.7428		0.945922	1.41819	0.581346		0.645212	0.967344	0.396535
	2193.4	3227.6	3036.2	8869	2231.1	978.5		1.47151	2.92109	0.438573		1.15166	2.28616	0.343245		0.785546	1.55939	0.234127
	3443.3	4450.8	2268	2870.8	3234.2	1402.5		1.2926	1.26578	0.433647		1.01164	0.990656	0.33939		0.690038	0.675724	0.231497
	3621.8	4315.1	4217.7	7876.2	4339	2786		1.19142	1.86742	0.642083		0.932458	1.46152	0.502521		0.636028	0.996898	0.342769
	3168.8	3601.2	2697.5	4916.2	2806.2	0		1.13646	1.8225	0		0.889437	1.42637	0		0.606683	0.972921	0
	2326.8	3525	2842.1	4003.9	2860.4	2070.7		1.51496	1.40878	0.72392		1.18567	1.10257	0.56657		0.808741	0.752062	0.386456
	2359.8	3059.7	3270	6027.3	3133.9	4444.1		1.29659	1.84321	1.41807		1.01477	1.44257	1.10984		0.692171	0.983976	0.757022
	2432.2	3293	2934.4	5712.4	3340.6	4495.4		1.35392	1.9467	1.34569		1.05963	1.52357	1.05319		0.722773	1.03922	0.718379
	1947	4071	2510.6	5525.3	2740.6	3889		2.09091	2.20079	1.41903		1.63643	1.72243	1.11059		1.11621	1.17486	0.757533
	2441.4	2456.5	6209.3	13115.5	2927.9	3150		1.00618	2.11223	1.07586		0.787482	1.65312	0.84201		0.53714	1.12759	0.574333
	2870.6	1664.7	2826.7	6425.9	2472.5	1503.2		0.579914	2.27329	0.607968		0.453865	1.77917	0.475821		0.30958	1.21357	0.324556
	3155.2	4715	4070.4	9331.7	2320.3	1818.7		1.49436	2.29258	0.783821		1.16955	1.79427	0.613451		0.797745	1.22386	0.418434
	2853.9	1141	2895.6	5831.2	1796	1909.1		0.399804	2.01381	1.06297		0.312903	1.57609	0.831927		0.21343	1.07505	0.567456
	3450	3539.4	3680.5	5196.7	2444.7	1763.3		1.02591	1.41195	0.721275		0.802922	1.10505	0.5645		0.547671	0.753755	0.385044
	3727.1	2522.9	3130.3	11606.4	1281.6	513.8		0.676907	3.70776	0.400905		0.529776	2.90185	0.313765		0.361359	1.97934	0.214018
	2687.7	936.8	3286.9	7317.6	2040.6	1403.4		0.348551	2.22629	0.687739		0.27279	1.74239	0.538253		0.18607	1.18848	0.367141
	2976.6	1496.9	2918	4612.2	1908.6	1289.9		0.502889	1.5806	0.675836		0.393582	1.23705	0.528937		0.268461	0.843786	0.360787
	1938.9	3821.3	3552.1	6830.8	2233.3	1812.7		1.97086	1.92303	0.811669		1.54248	1.50504	0.635246		1.05212	1.02659	0.4333
	2210.2	2588.3	2801.7	2946.3	1739.8	839.6		1.17107	1.05161	0.482584		0.916528	0.823035	0.37769		0.625162	0.56139	0.257622
	4484.9	5885.5	2675.7	3334	2780.8	1267.5		1.31229	1.24603	0.455804		1.02705	0.975194	0.356731		0.700552	0.665178	0.243326
	3290.2	4678.2	3780.6	4347.1	990	434.1		1.42186	1.14984	0.438485		1.11281	0.899916	0.343176		0.759042	0.61383	0.23408
	3103	5686.2	3681.8	6262.4	1445.4	1622.4		1.83248	1.70091	1.12246		1.43418	1.3312	0.878482		0.97825	0.908009	0.599211
	2949.4	5997.6	2548.7	2548.5	989.9	443.4		2.0335	0.999922	0.447924		1.5915	0.78258	0.350564		1.08556	0.533796	0.239119
	2309	4209.5	1737.5	2312.5	861.7	0		1.82308	1.33094	0		1.42682	1.04165	0		0.973231	0.710504	0
	2843.2	3811.3	3344.2	7122.2	997.2	0		1.3405	2.12972	0		1.04913	1.66681	0		0.715608	1.13692	0
	3714.2	4995.2	4330.7	8329.6	1802.6	697.7		1.34489	1.92338	0.387052		1.05257	1.50532	0.302923		0.717955	1.02678	0.206623
	3113.9	4724	2862.4	5213.6	1579.6	685.4		1.51707	1.82141	0.433907		1.18732	1.42551	0.339594		0.809869	0.972337	0.231636
	2397.8	3918.3	3463.5	7193.8	2111.6	1618.6		1.63412	2.07703	0.766528		1.27893	1.62557	0.599917		0.872357	1.1088	0.409202
	2500.4	2212.7	2683.4	3601.2	2777.6	2616.7		0.884938	1.34203	0.942072		0.69259	1.05033	0.737305		0.472414	0.716426	0.502914
	2408.4	2041.8	2320.3	6155.8	2521.5	2729.7		0.847783	2.65302	1.08257		0.66351	2.07636	0.847264		0.452579	1.41628	0.577917
	3882.9	4466.2	3121.3	2521.3	1585.5	527.8		1.15022	0.807772	0.332892		0.900212	0.632196	0.260535		0.614033	0.43122	0.17771
	3020.4	3199.9	3976.4	7039	1313.2	776.8		1.05943	1.77019	0.591532		0.829153	1.38543	0.462958		0.565564	0.944997	0.315782
	2398.3	3022.2	4233.2	4977.6	2474.4	1539		1.26014	1.17585	0.621969		0.98624	0.920268	0.486779		0.672712	0.627712	0.332031
	2962.8	5807.5	2742.5	4129.9	920.2	0		1.96014	1.50589	0		1.53409	1.17857	0		1.0464	0.803901	0
	4278.8	7039.1	3138.6	3703.5	1944.3	40.3		1.64511	1.17998	0.0207273		1.28753	0.923505	0.016222		0.878223	0.629921	0.011065
	2838.2	4394.7	1930.5	4989.7	1822.2	788.3		1.54841	2.58467	0.432609		1.21185	2.02287	0.338578		0.826601	1.37979	0.230943
	3807.6	5090.2	2142.2	4296.2	1840.1	218.9		1.33685	2.00551	0.118961		1.04628	1.56959	0.0931038		0.713663	1.07062	0.0635059
	4907.1	7510.5	2975.5	8747.7	2418.6	830.5		1.53054	2.93991	0.34338		1.19786	2.3009	0.268744		0.817059	1.56944	0.18331
	3693.8	8787.1	2016.6	7119.2	2462	0		2.37888	3.5303	0		1.86181	2.76296	0		1.26994	1.88461	0
	2384.6	3965.3	2005.2	3760.7	2368.1	953.3		1.66288	1.87547	0.402559		1.30144	1.46782	0.315059		0.887708	1.0012	0.214901
	3291.8	6250.1	3379.1	3888.8	4314.4	1306.2		1.89869	1.15084	0.302754		1.48599	0.900694	0.236948		1.01359	0.614362	0.161621
	2705.9	3630.7	3165.8	5976.4	2219.2	1137.6		1.34177	1.8878	0.512617		1.05013	1.47747	0.401196		0.716289	1.00778	0.273655
	3663.7	4294.8	3023	6390.6	2274	54.8		1.17226	2.11399	0.0240985		0.917458	1.6545	0.0188605		0.625796	1.12853	0.0128647
	3115.7	5245.3	2065	3614.9	1412.4	0		1.68351	1.75056	0		1.31758	1.37006	0		0.89872	0.934514	0
	2607.2	5133.3	1921.3	3900.4	565.9	0		1.96889	2.03008	0		1.54094	1.58883	0		1.05107	1.08374	0
	3595.4	5485.5	2605.4	5283.2	657.2	0		1.5257	2.02779	0		1.19408	1.58703	0		0.814476	1.08251	0
	6110.9	9089.1	2339.4	4763.7	1694.9	868.3		1.48736	2.03629	0.512302		1.16407	1.59369	0.400949		0.794009	1.08705	0.273486
	4518.1	7243.1	1380.4	3444	2829.4	2136		1.60313	2.49493	0.75493		1.25468	1.95264	0.59084		0.855812	1.33189	0.403011
	3072.1	4073	1879.3	3245	1766.3	1642.3		1.3258	1.72671	0.929797		1.03763	1.35139	0.727698		0.707764	0.921782	0.496361
	3250.6	4842.7	4331.7	7335.9	2988.9	2262.4		1.48979	1.69354	0.756934		1.16597	1.32543	0.592408		0.795305	0.904075	0.40408
	2251.3	2221.5	2748.3	6338.3	3959.7	2586.3		0.986763	2.30626	0.653156		0.772282	1.80498	0.511187		0.526772	1.23117	0.348679
	1186	1270.1	2283	4911.8	704.5	0		1.07091	2.15147	0		0.838139	1.68383	0		0.571693	1.14854	0
	3881.6	4453.2	2090.4	3194.6	1561.4	0		1.14726	1.52822	0		0.897893	1.19605	0		0.61245	0.815824	0
	3508.9	3140.5	2191.3	3837.5	2416.6	1776.8		0.89501	1.75124	0.735248		0.700472	1.3706	0.575436		0.47779	0.93488	0.392503
	5090.5	5470	1974	2329.8	906.7	0		1.07455	1.18024	0		0.840988	0.923707	0		0.573636	0.630059	0
	5618.7	6093.8	2303.7	4155.2	2061	173.7		1.08456	1.80371	0.0842795		0.848819	1.41166	0.0659606		0.578978	0.962887	0.0449916
	4298.6	5597.8	2505.8	4575.6	1518.7	523.3		1.30224	1.826	0.344571		1.01919	1.42911	0.269676		0.695184	0.97479	0.183945
	5921.7	8251.3	1676.8	2202.8	1762.3	1633		1.3934	1.31369	0.92663		1.09053	1.02815	0.725219		0.74385	0.701299	0.49467
	2913.6	4156.1	3500.8	7681.7	1583.8	1175.9		1.42645	2.19427	0.742455		1.1164	1.71733	0.581076		0.761492	1.17138	0.396351
	3032.7	3140.8	3682.2	6916.1	1341	1634.6		1.03564	1.87825	1.21894		0.810539	1.47	0.953994		0.552867	1.00268	0.650717
	4230.8	5233.7	3841.5	6287.6	2698.9	0		1.23705	1.63676	0		0.968165	1.28099	0		0.660383	0.873763	0
	5136.1	7083.2	4423.8	10501	3555	1678.4		1.3791	2.37375	0.472124		1.07934	1.8578	0.369504		0.736217	1.2672	0.252038
	3500.3	5309.6	3722.5	7309.4	3131	341.4		1.5169	1.96357	0.109039		1.18719	1.53677	0.0853382		0.809778	1.04823	0.058209
	2145.1	2129.6	2698.5	4530.6	3276.1	733.1		0.992774	1.67893	0.223772		0.776986	1.314	0.175133		0.529981	0.896278	0.119458
	3155.4	4092.4	2455.6	3817.4	4962.7	1740.4		1.29695	1.55457	0.350696		1.01505	1.21667	0.274469		0.692362	0.829888	0.187215
	2220.8	2450.4			3627.6	1149.3		1.10339		0.316821		0.863556		0.247957		0.58903		0.169131
	2879	4116.9			3507.6	624.5		1.42998		0.178042		1.11916		0.139343		0.763375		0.0950456
	2268.9	3322.3			3248.9	364.3		1.46428		0.11213		1.146		0.0877578		0.781687		0.0598594
	2490.9	3729.4			4403.7	0		1.49721		0		1.17178		0		0.799268		0
	5869.9	5744.5			2756.9	0		0.978637		0		0.765922		0		0.522434		0
	4971.2	5808			2581.8	1100.9		1.16833		0.426408		0.914383		0.333725		0.623699		0.227633
	4653.3	6876.8			2722.6	835.7		1.47783		0.306949		1.15661		0.240231		0.788923		0.163861
	4229	5337			3265.3	1037.7		1.262		0.317796		0.987694		0.248721		0.673704		0.169652
	4831.8	6993.3			2351.7	804.6		1.44735		0.342135		1.13276		0.267769		0.77265		0.182645
	2060.5	2173.7			2537.5	1294.8		1.05494		0.510266		0.825638		0.399355		0.563166		0.272399
	3738.8	5796.3			3958.9	2249.3		1.55031		0.568163		1.21334		0.444668		0.827615		0.303307
	3297.1	5041.7			3824.6	3081		1.52913		0.805574		1.19676		0.630476		0.816309		0.430046
	2327.7	4113.2			2959.8	697		1.76707		0.235489		1.38298		0.184303		0.943327		0.125713
	3463.2	4370.4			2248.5	1358.1		1.26195		0.604003		0.987658		0.472718		0.673679		0.32244
	4379.8	4682.8			3136.1	1900		1.06918		0.605848		0.836786		0.474162		0.57077		0.323425
	4865.7	8428			4643.7	4073.5		1.73212		0.87721		1.35563		0.686541		0.924674		0.468288
	3808.1	5986.4			4885.6	4341.3		1.57202		0.888591		1.23033		0.695448		0.839203		0.474364
	3636.6	5669.7			4587.1	4274.4		1.55907		0.931831		1.22019		0.729289		0.832289		0.497447
	3308.7	4864.9			6051.9	5396.3		1.47034		0.89167		1.15075		0.697858		0.784921		0.476008
	3337.3	4898.4			4929.5	3562.5		1.46777		0.72269		1.14874		0.565607		0.783553		0.385799
	2607.8	5438.3			1715.3	0		2.0854		0		1.63212		0		1.11326		0
	2234.8	3907.8			1733.8	0		1.74861		0		1.36854		0		0.933476		0
	3619.5	4615.5			2479.1	791.2		1.27518		0.319148		0.998006		0.249779		0.680738		0.170373
	4469.2	6910.6			2866.3	0		1.54627		0		1.21018		0		0.825459		0
	4369.4	8863.9			1978.7	0		2.02863		0		1.58769		0		1.08296		0
	3498.4	6341.6			1982.7	0		1.81271		0		1.41871		0		0.967696		0
	3841.5	6865			3529.8	272.5		1.78706		0.0771998		1.39863		0.0604198		0.954002		0.0412122
	5427.9	9347.6			3781.9	1388.9		1.72214		0.367249		1.34782		0.287425		0.919344		0.196052
	3314.3	7135			3006.1	1438.7		2.15279		0.478594		1.68486		0.374567		1.14924		0.255491
	3533.4	7184			4466.6	789		2.03317		0.176644		1.59124		0.138249		1.08538		0.0942995
	2233	4094.1			4354.3	0		1.83345		0		1.43494		0		0.978767		0
	3053.2	5362.6			3203.5	0		1.75639		0		1.37462		0		0.937626		0
	3443.3	5744.8			2901.3	0		1.6684		0		1.30576		0		0.890655		0
	2023.5	2752.8			2486.5	0		1.36042		0		1.06472		0		0.726241		0
	2075	1708.3			1728.4	0		0.823277		0		0.644331		0		0.439497		0
	3041	3908.9			1708.4	0		1.2854		0		1.00601		0		0.686195		0
	3618.7	4210.7			2142.6	0		1.16359		0		0.910678		0		0.621171		0
	2667.7	4813.8			1519.4	0		1.80448		0		1.41226		0		0.963298		0
	2541.4	2212.6			2104	1146.7		0.870622		0.54501		0.681385		0.426547		0.464771		0.290947
	3019.6	2713.9			1851.9	2014.6		0.898761		1.08786		0.703408		0.851401		0.479793		0.580739
	5170.5	8413.7			2632.1	2646.1		1.62725		1.00532		1.27355		0.786804		0.868688		0.536678
	2523.9	3678.7			2230.4	2229.9		1.45755		0.999776		1.14074		0.782466		0.778093		0.533718
	2563.6	2974			1880.7	2442.5		1.16009		1.29872		0.907933		1.01643		0.619299		0.693305
	3289.7	3710.5			1853	1563.3		1.12791		0.843659		0.882753		0.660283		0.602124		0.450377
	3280.4	5121.9			1768.2	795.8		1.56136		0.450062		1.22199		0.352237		0.833516		0.24026
	5436	7765.7			3289.7	3554.4		1.42857		1.08046		1.11806		0.845616		0.762624		0.576792
	2764.5	3124.6			2351.2	2441.2		1.13026		1.03828		0.884587		0.8126		0.603375		0.554272
	3035.3	4851.8			3108.6	2655.9		1.59846		0.854372		1.25102		0.668667		0.853318		0.456096
	3808.7	5048.2			3834.5	2675.1		1.32544		0.69764		1.03734		0.546002		0.70757		0.372427
	3667.7	3217			2180	1097.9		0.877116		0.503624		0.686468		0.394157		0.468238		0.268854
	3014.7	2851.2			1483.5	1974.9		0.945766		1.33124		0.740196		1.04189		0.504886		0.710669
	3576.3	2440.4			2215.8	1878		0.682381		0.847549		0.53406		0.663327		0.364281		0.452454
	2148.7	1923.6			1643.2	1994.7		0.895239		1.21391		0.700651		0.950058		0.477913		0.648032
	1597.4	0			2254.8	533.3		0		0.236518		0		0.185109		0		0.126262
	1321.8	0			1893.3	1186.1		0		0.626472		0		0.490303		0		0.334435
	1155.9	0			2265.1	3301.7		0		1.45764		0		1.14081		0		0.778144
	1450.8	0			1959.1	221.9		0		0.113266		0		0.0886469		0		0.0604659
	1934.1	1635			1603.1	604.9		0.845354		0.377331		0.66161		0.295315		0.451282		0.201434
	2832.2	2615.2			2450.5	0		0.923381		0		0.722676		0		0.492936		0
	3296.8	3269.5			3005.7	0		0.991719		0		0.776161		0		0.529417		0
	2750.8	2498.4			3721.9	0		0.908245		0		0.71083		0		0.484856		0
	3223.1	3463.9			4710.7	781.6		1.07471		0.16592		0.841113		0.129856		0.573721		0.0885745
	2925.9	2239.7			2573.5	0		0.765474		0		0.599092		0		0.408639		0
	2879	2215.4			2766.2	0		0.769503		0		0.602245		0		0.41079		0
	3843.3	2960.7			4125	0		0.770354		0		0.602911		0		0.411244		0
	3712.5	2327			5163.6	0		0.626801		0		0.490561		0		0.33461		0
	3659.2	2410.7			2906.6	0		0.658805		0		0.515608		0		0.351695		0
	3508.3	2824.1			3178.6	0		0.804977		0		0.630008		0		0.429727		0
	3466.4	2501.8			2828.5	0		0.721729		0		0.564855		0		0.385286		0
	5638.9	5099.3			3937.3	0		0.904308		0		0.707749		0		0.482754		0
	3195.7	3627.5			3286.3	0		1.13512		0		0.888391		0		0.60597		0
	3168.7	4059.4			3424.9	302.6		1.28109		0.0883529		1.00264		0.0691487		0.683896		0.0471662
	5644.9	3642.4			885.5	1197		0.645255		1.35178		0.505003		1.05796		0.344462		0.721631
	4340.8	3278.5			2247.1	3172.7		0.755276		1.41191		0.59111		1.10502		0.403195		0.753731
	2829.9	843			1999.5	2848.5		0.29789		1.42461		0.233141		1.11496		0.159025		0.760509
	3681.2	2460.5			1718.9	864.8		0.668396		0.503112		0.523115		0.393757		0.356815		0.268581
	1902.8	137			1424.6	1355.3		0.0719992		0.951355		0.0563495		0.74457		0.0384359		0.507869
	496.2	2121.3			1136.6	582		4.27509		0.512053		3.34586		0.400754		2.28221		0.273354
	774.3	1450.8			257.9	0		1.87369		0		1.46643		0		1.00025		0
	1570.5	2023.2			2297.5	0		1.28825		0		1.00824		0		0.687718		0
	2469.8	4246.3			3952.1	838.2		1.71929		0.21209		1.34559		0.16599		0.917822		0.113222
	3435.5	5304.8			1777.9	0		1.54411		0		1.20849		0		0.824306		0
	4227.5	8019.1			1493.6	0		1.89689		0		1.48458		0		1.01263		0
	3621.8	6120.8			3289.2	0		1.68999		0		1.32266		0		0.90218		0
	3884.6	6892.3			2095.9	0		1.77426		0		1.38861		0		0.947169		0
	4650.4	5891.4			1199.7	0		1.26686		0		0.991496		0		0.676297		0
	6137.8	9104.1			2181.3	339		1.48328		0.155412		1.16088		0.121632		0.791833		0.0829648
	3671.8	4164.4			1975.6	248.9		1.13416		0.125987		0.887639		0.0986027		0.605457		0.0672567
	2099.3	2400.7			1946.1	0		1.14357		0		0.895007		0		0.610482		0
	1352.9	3570.3			1628.1	0		2.639		0		2.06539		0		1.4088		0
	2095.3	4035.4			1839.9	0		1.92593		0		1.50731		0		1.02813		0
	2455	4616.3			1948.1	30.6		1.88037		0.0157076		1.47165		0.0122934		1.00381		0.00838532
	3506.2	5933.3			2038.6	424.3		1.69223		0.208133		1.32441		0.162894		0.903377		0.111109
	3409	5910.4			1998.9	896.4		1.73376		0.448447		1.35692		0.350973		0.925549		0.239398
	3013.2	4917.8			2807.4	1981.6		1.63209		0.705849		1.27734		0.552427		0.871269		0.376809
	3819.1	6254.9			3684.3	2736.4		1.63779		0.742719		1.28181		0.581283		0.874317		0.396492
	2780.9	5325.7			2237.4	690.4		1.9151		0.308572		1.49884		0.241502		1.02235		0.164728
	1775.9	3129.8			3375.9	2127.4		1.76237		0.630173		1.37931		0.493199		0.940822		0.33641
	1507.1	2201.1			1413.7	0		1.46049		0		1.14304		0		0.779664		0
	1010	2736			2759.1	2659.5		2.70891		0.963901		2.12011		0.754389		1.44612		0.514567
	693.8	0			2110.5	2218.8		0		1.05131		0		0.822803		0		0.561232
	973	0			2053.1	2304.5		0		1.12245		0		0.878475		0		0.599206
	1350.6	0			2607.4	2571.5		0		0.986231		0		0.771866		0		0.526488
	3134.9	1973.1			2293	1808.9		0.629398		0.788879		0.492593		0.61741		0.335997		0.421134
	1781.4	733.7			1018.6	0		0.411867		0		0.322344		0		0.21987		0
	1685.2	1601.6			144.3	0		0.950392		0		0.743816		0		0.507355		0
	2940.9	1113.2			1474.7	1088.9		0.378524		0.738387		0.296248		0.577893		0.20207		0.394179
	2215.6	1006.8			1523.7	1598.6		0.454414		1.04916		0.355643		0.821114		0.242584		0.56008
	1284	233.1			1479.9	1176.1		0.181542		0.794716		0.142082		0.621978		0.0969141		0.42425
	2527.7	1033.8			1752	1619.2		0.408988		0.924201		0.320091		0.723318		0.218334		0.493374
	2081.2	842.8			2505.3	2349.3		0.404959		0.937732		0.316938		0.733908		0.216182		0.500597
					1803.9	1761.7				0.976606				0.764333				0.52135
					1013.4	0				0				0				0
					1180.2	1786.8				1.51398				1.1849				0.808221
					768.2	0				0				0				0
					2223.9	1296.2				0.58285				0.456163				0.311147
					996.7	0				0				0				0
					2109.1	717.9				0.340382				0.266397				0.181709
					1835.7	1134.4				0.617966				0.483646				0.329894
					1858.1	1179.3				0.634681				0.496727				0.338817
					1227.2	182.3				0.14855				0.116261				0.0793014
					1962.7	0				0				0				0
					2467.6	282.5				0.114484				0.0895997				0.0611158
					2741.9	1527.9				0.557241				0.43612				0.297477
					2106	1209.8				0.574454				0.449592				0.306665
					1977.6	0				0				0				0
					2535.8	38.9				0.0153403				0.012006				0.00818925
					2189.1	0				0				0				0
					1741.3	0				0				0				0
					3359.3	0				0				0				0
					2418	0				0				0				0
					3236.5	142.5				0.044029				0.034459				0.0235044
					3031.8	883.6				0.291444				0.228096				0.155584
					2539.1	233.2				0.0918436				0.0718806				0.0490296
					1965	0				0				0				0

## Sheet: Raw data
	Exp 2023-02-09 RPE1 siCTRL vs siSGO1
	Early Anaphase UFBs										Mid/Late Anaphase UFBs										siSGO1 Pre-UFBs
	RPE1-STB-ICRF_rBLMPICHCEN-02 z6-16			Area	Mean	StdDev	Min	Max	Length		RPE1-STB-ICRF_rBLMPICHCEN-01 z8-13			Area	Mean	StdDev	Min	Max	Length		RPE1siSgo1-STB-ICRF_rBLMPICHCEN-01 (top) z9-18			Area	Mean	StdDev	Min	Max	Length
	Background	PICH	1	0.2	1593	139.7	1324.5	1831.3	3.5		Background	PICH	1	0.2	3278.7	207.1	2840.2	3685.1	3.8		Background	PICH	1	0.4	3002.5	285.3	2516.3	3512.1	6
	Background	BLM	2	0.2	8451.8	518.4	7709.4	10082.6	3.5		Background	BLM	2	0.2	13444.9	1122.2	11365.9	15680.5	3.8		Background	BLM	2	0.4	12957.5	1036.9	11728.8	16410.8	6
		PICH	3	0.3	2846.9	368.6	2106.4	3415.7	4.4			PICH	3	0	9780.9	280.5	9299.5	10126.4	0.6			PICH	3	0.1	4800.9	812.4	3570.2	6008.2	1.1
		BLM	4	0.3	9655.2	1311.1	7139.6	12273.8	4.4			BLM	4	0	23612.4	2297.9	21590.5	27896	0.6			BLM	4	0.1	12631.8	939.1	11686.8	14567.5	1.1
		PICH	5	0.4	3609.5	570.6	2836.5	4661	5.4			PICH	5	0.4	8519.9	2185.2	4666.8	13100.4	5.6			PICH	5	0.1	6626.4	779.6	5415	8071.2	1.2
		BLM	6	0.4	11853.7	1584.6	9287.2	15006.9	5.4			BLM	6	0.4	20247.3	4818.9	11515	27802.9	5.6			BLM	6	0.1	15161.7	852.4	13827.1	16462.8	1.2
		PICH	7	0.3	3560.2	566	2542.6	4681.1	5			PICH	7	0.1	7923.8	1726.6	6209.6	11771	2.1			PICH	7	0.1	6143	1254.6	4376.6	8119.6	1.3
		BLM	8	0.3	11560	1829.7	8284.5	15547.6	5			BLM	8	0.1	23475	2580.6	20059.7	28244.2	2.1			BLM	8	0.1	14210.3	924.8	13076.1	16017.9	1.3
		PICH	9	0.5	3429.3	439.9	2607.5	4490.1	7.7			PICH	9	0.2	7429.7	2044.5	4811.7	9948.3	3.2			PICH	9	0.1	7359.4	857.5	5264.4	8615.9	1.4
		BLM	10	0.5	11699.9	1579.9	8967.3	14260.2	7.7			BLM	10	0.2	23886.1	4046.1	17834.4	31096.1	3.2			BLM	10	0.1	16810.4	1465	13849	19837	1.4
		PICH	11	0.1	4164	645.6	3167.4	5075.3	1.5			PICH	11	0.1	9242.6	644.6	7416.5	9882.6	2.1			PICH	11	0.1	6216.6	718.5	4919.9	7405.1	1.8
		BLM	12	0.1	13137.3	881.9	10905.3	14745	1.5			BLM	12	0.1	25998.7	3232.9	18505.5	31037	2.1			BLM	12	0.1	15112.2	1663.6	12761	18986.2	1.8
		PICH	13	0.1	4747.9	861.7	3531.8	6094	1			PICH	13	0.2	8443.5	839.2	7052.8	10206.6	2.5			PICH	13	0.1	6214.4	721.7	4660.6	6868	1.5
		BLM	14	0.1	12264.9	721.9	11398.9	13560.1	1			BLM	14	0.2	22803.8	2211.6	18090	26096.7	2.5			BLM	14	0.1	15343.3	917.9	13956.3	16730.8	1.5
		PICH	15	0.5	3786.4	935.4	2263	5552.4	7.3			PICH	15	0.1	6314.9	316.9	5382	6808	1.7			PICH	15	0.1	5233.6	471.6	4329.2	5869	1.6
		BLM	16	0.5	11679.4	1915.7	7340.5	15291.9	7.3			BLM	16	0.1	22313.9	2175.8	16023	24583	1.7			BLM	16	0.1	13936	554.6	12735.9	14834.7	1.6
		PICH	17	0.2	5036.3	367.7	4086.7	5609.9	2.6		RPE1-STB-ICRF_rBLMPICHCEN-03 z10-15											PICH	17	0.1	6236.7	605.1	5294.2	6879.5	0.9
		BLM	18	0.2	12902.6	663.9	11302.4	14100.4	2.6		Background	PICH	1	0.5	2264.7	135.5	1972	2612.2	7.3			BLM	18	0.1	14360	557.3	13074.5	15228	0.9
		PICH	19	0.2	5214.8	845.8	2812.5	6440.1	3.1		Background	BLM	2	0.5	10524.6	717.2	8906	12561	7.3			PICH	19	0.1	7341.5	1153.2	5398	9603.9	1.4
		BLM	20	0.2	12766.9	1825.4	8224.5	15191.8	3.1			PICH	3	0.3	4532.7	1159.2	2680.4	6807.6	5			BLM	20	0.1	15743.5	1361.4	14002.8	18305.2	1.4
		PICH	21	0.2	4761.8	1116.9	2842.9	7103.7	3.6			BLM	4	0.3	13395.4	2659.6	9931	20308.5	5			PICH	21	0.1	5808.7	1056.1	4529.6	7505.3	1.2
		BLM	22	0.2	12053	2600.7	8527.8	18699	3.6			PICH	5	0.1	6482.4	695.7	4651	7484.9	1.6			BLM	22	0.1	12645.6	450.3	11928.9	13401.1	1.2
		PICH	23	0.4	3919.8	791.4	2421	5436.4	6.6			BLM	6	0.1	18400.8	2178.6	14473	21683.8	1.6		RPE1siSgo1-STB-ICRF_rBLMPICHCEN-01 (bottom) z16-31
		BLM	24	0.4	11976.8	1667.9	8330	15894.8	6.6			PICH	7	0.4	4962.2	648.6	3639	6567.4	6.5		Background	PICH	1	0.4	3332.9	207.1	2961.6	3763.5	6.1
		PICH	25	0.3	3952.8	1253.6	2548.4	6127.2	4.4			BLM	8	0.4	15440.8	2237.1	11987.3	21699.2	6.5		Background	BLM	2	0.4	15300.3	1112.9	13611.9	18115.9	6.1
		BLM	26	0.3	11511.5	2922.1	7562.6	16789.1	4.4			PICH	9	0.5	5106.8	569	4238.8	6476.1	7.2			PICH	3	0.5	6193.3	674.3	4835.6	8205.8	7.9
		PICH	27	0.5	4025.2	1042.3	1908	6351.2	8.1			BLM	10	0.5	14528.5	1404	11621	18236.7	7.2			BLM	4	0.5	17371	1129.7	14814.9	20594	7.9
		BLM	28	0.5	11744.8	2891.4	6716.2	16428.3	8.1			PICH	11	0.1	5534.7	1229.2	4149.1	8639	1.4				5	0.2	6466.8	590.3	5802.6	7888.9	3.4
	RPE1-STB-ICRF_rBLMPICHCEN-05 z13-27											BLM	12	0.1	16551.9	4289.1	12501.9	25737	1.4				6	0.2	19744.4	1344.9	17878.3	22741.9	3.4
	Background	PICH	1	0.2	2620.3	175.3	2441.7	3109.7	3			PICH	13	0.2	5199.1	418.3	4025	6056.7	2.9				7	0.2	6673.5	425.5	5994.1	7664.2	3.1
	Background	BLM	2	0.2	10482.8	943.9	9469.9	12593.5	3			BLM	14	0.2	16237	1080.5	13267	19168.6	2.9				8	0.2	19795.7	1181.5	18072.7	21744.5	3.1
		PICH	3	0.1	4567.3	410.1	3757.2	5080.2	1.2			PICH	15	0.3	4775.3	573.9	2928	5667.4	4.5				9	0.6	6073.5	739.9	4984.6	7947.8	8.5
		BLM	4	0.1	14553.8	1026.2	12453	15667.1	1.2			BLM	16	0.3	16049.9	1575.6	11997	19370	4.5				10	0.6	19189.3	1726.3	16106.8	24744.4	8.5
		PICH	5	0.2	5061.7	478.7	4395.6	5988.4	2.4		RPE1-STB-ICRF_rBLMPICHCEN-04 z8-16												11	0.4	6260.8	414.8	5376.3	7474	6.3
		BLM	6	0.2	12939.3	563	11762.1	14054.1	2.4		Background	PICH	1	0.6	2389.3	170	1921	2656.9	9.7				12	0.4	18450.3	828.1	16293	20360.2	6.3
		PICH	7	0.2	5490.9	457.2	4690	6456.2	2.4		Background	BLM	2	0.6	11720.4	1231.6	8840	14144.5	9.7				13	0.1	5805.4	478.9	5000	6529.2	2.1
		BLM	8	0.2	12147.5	607.9	11054.7	13168.4	2.4			PICH	3	0.1	8598.6	4244.2	4167	17199.4	2.2				14	0.1	16803.5	351.7	16239.7	17625.8	2.1
		PICH	9	0.1	5775.5	1143.9	4345	7377	1.6			BLM	4	0.1	24835.9	10297.7	12875	47640.5	2.2				15	0.2	5653.2	284.6	5040	6492.4	3.8
		BLM	10	0.1	15197.8	2166.9	12487.9	19204	1.6			PICH	5	0.5	5216	713.5	3999	6941.4	7.8				16	0.2	17119	863.4	15784.7	19427.7	3.8
		PICH	11	0.1	5474.2	492.3	4720	6293.6	1.5			BLM	6	0.5	18146.3	3131.6	11256	22501.6	7.8				17	0.5	5128.9	444.8	4337.3	6238.2	7.3
		BLM	12	0.1	11623.8	486.9	10765.8	12317.3	1.5			PICH	7	0.2	6459.7	949.9	4290	8553.4	3				18	0.5	17209.4	777.3	15828	19415.3	7.3
		PICH	13	0.2	6070.3	539	4734	7009	2.3			BLM	8	0.2	21052.1	2259.7	16002	24222.5	3				19	0.1	5777.6	553.9	4564	6550.6	1.2
		BLM	14	0.2	14022.2	1249.2	12219	16698.6	2.3			PICH	9	0.2	5284.9	717.9	3437	6850	3.4				20	0.1	17063.6	702	15933.3	18159.3	1.2
		PICH	15	0.2	6347.4	762.8	5055.4	7829.9	2.8			BLM	10	0.2	17551.6	1732	14713.9	20732.2	3.4		RPE1siSgo1-STB-ICRF_rBLMPICHCEN-02 z9-23
		BLM	16	0.2	13005.7	1153.9	11557.6	15479.5	2.8		RPE1-STB-ICRF_rBLMPICHCEN-06 z10-12										Background	PICH	1	0.4	2537.4	141.1	2317.9	3061.6	5.6
		PICH	17	0.2	5308	655.7	4595.6	7349	2.5		Background	PICH	1	0.4	2723.2	174.1	2361.6	3281.7	6.5		Background	BLM	2	0.4	9903.7	780.7	8645.2	11870	5.6
		BLM	18	0.2	11419.6	778.5	10614.2	13415	2.5		Background	BLM	2	0.4	13304.7	877.7	11540	16254.3	6.5			PICH	3	0.3	3819	322.1	2989.6	4304.2	4
		PICH	19	0.1	5596.9	1243.5	4077.8	7342	1.7			PICH	3	0.1	6403.7	817.4	5117	7857.3	1.1			BLM	4	0.3	10417.5	547.8	9448	12090.5	4
		BLM	20	0.1	11979.7	2091.4	9736.5	15407.2	1.7			BLM	4	0.1	18501.4	1964.3	15129	21144.3	1.1				5	0.2	4578	284	3961.9	5136.6	2.6
	RPE1-STB-ICRF_rBLMPICHCEN-08 z9-31											PICH	5	0.3	5853.5	821.2	4512.9	8004	4.8				6	0.2	11307.1	685.1	10434.1	13149	2.6
	Background	PICH	1	0.2	3645.6	310.7	3005.1	4134.2	2.9			BLM	6	0.3	24911.1	2317.8	19904.5	29378.4	4.8				7	0.3	4446	396.6	3650.4	5462.1	5
	Background	BLM	2	0.2	13793.3	592.6	12743.5	14902.3	2.9		RPE1-STB-ICRF_rBLMPICHCEN-07 z8-18												8	0.3	11193.6	810	9540	13726.1	5
		PICH	3	0.1	5584.5	378.6	4743	6096.7	1.3		Background	PICH	1	0.3	3350.3	136.1	3050	3655.2	4.7				9	0.4	4770.7	454	4012.7	5943.6	6.2
		BLM	4	0.1	17614.6	1538.1	15576.9	20548	1.3		Background	BLM	2	0.3	13954.4	1234.7	10856	16501.9	4.7				10	0.4	11716.4	1222.8	9781.5	14603.7	6.2
		PICH	5	0.2	5855.8	817.9	4399	7122.3	3.8			PICH	3	0.3	6637.2	980.9	5282.3	9049.8	4				11	0.5	4277.2	581.5	3220.5	5275.4	7.5
		BLM	6	0.2	16381.6	1591.8	12469.3	19434.6	3.8			BLM	4	0.3	21272	2371.4	16550	26567.8	4				12	0.5	10743.3	711.9	9415.1	12047.1	7.5
		PICH	7	0.1	8130.5	1019.9	5941.1	9817	1.7			PICH	5	0.6	6268.3	922.4	3840.3	8557.4	9.5				13	0.4	5318.2	517	3832	6500.1	6.1
		BLM	8	0.1	19678.8	2006.9	15894.5	22491.7	1.7			BLM	6	0.6	18566.6	3329.3	11690.8	24092.9	9.5				14	0.4	11171.2	807.3	9285	13953.1	6.1
		PICH	9	0.2	6935.8	1142.8	4173.5	8784.4	3.5			PICH	7	0.3	6902.4	1383.6	4364.8	10197.1	4.6				15	0.3	3527.4	264.1	3037.6	4125.5	4.7
		BLM	10	0.2	18471.5	2693.9	13076.5	23004.3	3.5			BLM	8	0.3	20785.2	2831.6	13373.1	25068.4	4.6				16	0.3	10337.8	724	9357.9	12100.3	4.7
		PICH	11	0.2	6748.6	490.1	5716	7809.7	2.4		RPE1-STB-ICRF_rBLMPICHCEN-09 z14-17												17	0.1	3982.8	339.3	3386.5	4613.1	1.5
		BLM	12	0.2	19479.5	2331.7	17079	26705.4	2.4		Background	PICH	1	0.2	2459.3	98.3	2275.6	2681.4	3				18	0.1	11526.1	1010.9	9769.2	13084.8	1.5
		PICH	13	0.1	6595	865.8	5164.4	8273	2		Background	BLM	2	0.2	12177.8	893.9	10260	13824.4	3				19	0.3	3527.3	272.7	3021.9	4183.6	4.9
		BLM	14	0.1	19790.9	2813.1	15209.8	26141.5	2			PICH	3	0.3	5261	2265.8	2814.8	12471	4.3				20	0.3	10347.1	768.3	9301.6	12014.7	4.9
		PICH	15	0.3	5954.6	461	5156.7	7334.9	4.9			BLM	4	0.3	15124.1	3084.7	10410.6	25962	4.3		RPE1siSgo1-STB-ICRF_rBLMPICHCEN-03 z10-18
		BLM	16	0.3	18002.8	1704	14404.4	21663.9	4.9		RPE1-STB-ICRF_rBLMPICHCEN-11 z8-19										Background	PICH	1	0.5	3508.9	221.6	2958.5	3915.3	7.3
		PICH	17	0.3	6488.8	407.5	5648	7429.8	4.6		Background	PICH	1	0.2	2920.4	72.4	2689	3032.2	3		Background	BLM	2	0.5	11892.8	738.5	10379.5	13520.9	7.3
		BLM	18	0.3	17604.6	1833.7	13061	21785	4.6		Background	BLM	2	0.2	12770	954	11360.2	15449.7	3			PICH	3	0.2	4370.6	608.6	3603.9	5445.5	2.5
		PICH	19	0.2	7359.8	473	6505.4	8138.1	2.7			PICH	3	0.5	5596.1	747	3670.5	7492	7.4			BLM	4	0.2	11534.4	514	10635	12659.9	2.5
		BLM	20	0.2	18788.5	1198.1	16956.9	21058.5	2.7			BLM	4	0.5	16104	2469.7	10491.2	21585.6	7.5				5	0.4	4506.1	482.5	3473.6	5334.8	6.8
		PICH	21	0.3	6759.5	939.4	5275.6	8312.8	4			PICH	5	0.2	6701	889.2	4627	8418.3	3				6	0.4	11759.1	754.6	10403	13438.9	6.8
		BLM	22	0.3	18517.3	2643.5	13662	22821.6	4			BLM	6	0.2	17117.1	3175.7	10315.5	21396.2	3				7	0.4	5311.5	504.4	4190.6	6576.7	6.7
		PICH	23	0.3	6043.4	900.3	4105.5	7710.9	4			PICH	7	0.4	6602.2	781.1	5007.5	8168.5	5.5				8	0.4	12590.5	778.1	10950.1	14826.1	6.7
		BLM	24	0.3	17711.6	1777.4	13217	20417.6	4			BLM	8	0.4	19032.4	3338.8	12418.5	24155.1	5.5				9	0.5	5088.5	490.4	3873.6	6037.7	7.8
		PICH	25	0.2	6146	607.4	4683.2	7092.2	3.1			PICH	9	0.3	5469.1	464.1	4475.8	6308.2	4.9				10	0.5	12578.2	949.3	10622.9	14612.1	7.8
		BLM	26	0.2	16006	1077.6	13663.6	17368	3.1			BLM	10	0.3	15318.5	2122.2	10487	18154.7	4.9				11	0.3	5620.5	674.6	4518.3	6711.9	4.9
		PICH	27	0.2	6054	957.8	4654.2	8030.5	2.8			PICH	11	0.2	4657.9	699.3	3672.8	6385.5	2.9				12	0.3	13511.4	1039.9	11716.2	15604.7	4.9
		BLM	28	0.2	15835.1	1676.1	12173.5	17746	2.8			BLM	12	0.2	15082.5	2009.2	10911	18673.3	2.9				13	0.4	6286.5	1118.4	4840.3	8175.5	5.7
		PICH	29	0.2	7528.5	1018.8	5205	9644.3	3.4		RPE1-STB-ICRF_rBLMPICHCEN-12 z12-22												14	0.4	14509.5	2490.3	11454.8	20520.1	5.7
		BLM	30	0.2	18259.5	2940.2	13256.8	22528.1	3.4		Background	PICH	1	0.5	2277	257.1	1914.7	2862.3	7.6				15	0.4	6030.4	590	4921.5	7334.7	6.1
		PICH	31	0.4	6666	1007.4	4192	8671.9	6		Background	BLM	2	0.5	11027.5	698.3	9837	12904.6	7.6				16	0.4	14622.5	1046.4	13052.2	16847.9	6.1
		BLM	32	0.4	16993.2	3237.4	11817	24641.6	6			PICH	3	0.1	5621.2	709	3706	7031.9	1.8				17	0.1	5094.4	236.4	4576.5	5542.4	1.8
		PICH	33	0.3	6043.9	510.2	4665	6998.6	4.3			BLM	4	0.1	18149.7	1759.2	14342	20607.5	1.8				18	0.1	12420.6	547.5	11379.4	13431.3	1.8
		BLM	34	0.3	16815.5	2097.2	12819.7	22905.3	4.3			PICH	5	0.2	6607.7	1182.5	5098.3	9490.1	2.3				19	0.5	4822.1	426.5	4053.5	5767.2	7.4
	RPE1-STB-ICRF_rBLMPICHCEN-10 z9-27											BLM	6	0.2	19357.1	753	17884	20836.4	2.3				20	0.5	12669.6	799.9	11343.8	15293.9	7.4
	Background	PICH	1	0.4	3469.4	159.5	3187.1	3959.9	6.4			PICH	7	0.2	5139.4	680.6	4047.3	6117.8	2.8				21	0.5	5983.3	983.4	4556.7	8548.5	7.3
	Background	BLM	2	0.4	14274	691.8	13125	16826.9	6.4			BLM	8	0.2	16241.1	1355.5	12678	18410	2.8				22	0.5	13431.8	760.9	11724.5	15665.7	7.3
		PICH	3	0.2	6432.2	405.9	5476.4	7379.5	3.6			PICH	9	0.3	5740.5	648.9	4928.5	7140.9	3.9		RPE1siSgo1-STB-ICRF_rBLMPICHCEN-04 (left) z18-34
		BLM	4	0.2	20081.5	1651.4	18365.7	24524.7	3.6			BLM	10	0.3	18221.3	2293.3	13974	22163.6	3.9		Background	PICH	1	0.5	4815.8	412.6	3950.3	5609	7.3
		PICH	5	0.4	7748.2	1065.8	5699.5	9592.1	5.8			PICH	11	0.5	4960.4	870.8	3490.3	7152.1	7.1		Background	BLM	2	0.5	13718.7	590.7	12703	15558.7	7.3
		BLM	6	0.4	21313.1	2702.4	15873.5	25895.6	5.8			BLM	12	0.5	14628.7	2698	9532.6	18489.2	7.1			PICH	3	0.1	5736	696.4	4525	6744.5	1.4
		PICH	7	0.5	6307.6	1088.3	4114.9	7976.6	7.2			PICH	13	0.5	4597.3	847.3	3308.8	6657.6	7.3			BLM	4	0.1	13605.7	704.8	12325	15270.1	1.4
		BLM	8	0.5	18668.7	2445.1	14748.7	23140.8	7.2			BLM	14	0.5	17183.3	2357.4	12801.5	22219.2	7.3				5	0.1	6760.1	746.2	5592	7860	1.4
		PICH	9	0.3	7277	750.2	5689.6	8721.9	4.9		RPE1-STB-ICRF_rBLMPICHCEN-15 z8-15												6	0.1	13759	1442.9	12037	17017.4	1.4
		BLM	10	0.3	19364.2	1581.4	16485.8	22156.5	4.9		Background	PICH	1	0.5	2342.5	174.8	2033	2810.5	7.4				7	0.1	6638	508	5631	7444.4	1.4
		PICH	11	0.1	8376.5	433.5	7208	9293.5	1.7		Background	BLM	2	0.5	9912.5	1162.8	7590.1	13020.2	7.4				8	0.1	14507	223.8	14183.9	14984	1.4
		BLM	12	0.1	21784.5	1272.9	19858.1	23393.9	1.7			PICH	3	0.3	5463.8	963.9	3921.1	6916.2	4				9	0.3	6655.9	724.9	5735.1	8745.2	3.9
		PICH	13	0.1	7163.2	309.5	6372.8	7547.4	1			BLM	4	0.3	12433.8	1065	10675	14552.7	4				10	0.3	13937.6	694.1	12537.3	15561	3.9
		BLM	14	0.1	23061.1	1790.5	20408.9	26217.6	1			PICH	5	0.1	6318.9	2966.1	3682.9	12647.1	1.9				11	0.4	7234.4	1197.9	5481	9046.8	5.8
		PICH	15	0.3	5854	546.4	4889.4	7000.3	4			BLM	6	0.1	16951.5	8764.8	9994.7	37912.8	1.9				12	0.4	14549.2	1108.4	12404.9	17062.8	5.8
		BLM	16	0.3	18239.3	1853.2	15635.3	22473.5	4			PICH	7	0.2	6575.7	1670.5	4257.6	11822	3.6				13	0.3	7277.8	862.7	5956.2	9453.5	4.2
		PICH	17	0.2	6761.2	599	6053.7	8257.9	3.2			BLM	8	0.2	14890.1	2140	12331	22286.3	3.6				14	0.3	13565.5	1035.2	12271.9	16185.2	4.2
		BLM	18	0.2	20524.1	1804.1	17784.5	24291.2	3.2			PICH	9	0.3	5085	930.3	3690.1	7422.7	5				15	0.2	7183.9	1023.8	5965.8	9936.4	2.9
		PICH	19	0.4	6175.3	674.5	4470.4	7466.7	6.7			BLM	10	0.3	14042.4	1670.6	10541.9	17997	5				16	0.2	14672	652.4	13649.3	16318.8	2.9
		BLM	20	0.4	17904.7	1288.4	14754.6	20168.8	6.7			PICH	11	0.3	5481.1	863.3	3859.1	7758.3	5.3				17	0.2	9130.2	2460.6	5903.4	12689.1	3.7
		PICH	21	0.3	7133.1	1252.9	5209.4	9229.5	5.3			BLM	12	0.3	13616	1607	9413.1	17435.2	5.3				18	0.2	15024.9	1607.9	12987.1	18338	3.7
		BLM	22	0.3	18568.8	2318.3	15335.2	23011.2	5.3		RPE1-STB-ICRF_rBLMPICHCEN-17 z12-17												19	0.5	7035	1099.1	5293.7	8960.9	7.5
		PICH	23	0.4	6585.1	711.9	5164.1	7858.6	6.9		Background	PICH	1	0.4	2470.3	109.8	2283.6	2731.2	5.6				20	0.5	14856.3	1032.6	12564.1	16727.1	7.5
		BLM	24	0.4	19519.3	2508.7	15607.8	23742.5	6.9		Background	BLM	2	0.4	11631.9	727.1	10122.5	13860.4	5.6				21	0.1	7089.8	568.3	6464.1	8143.6	1.8
		PICH	25	0.3	6076.6	472.9	4996	6836.8	5.1			PICH	3	0.5	4400.8	576.3	3319.3	6002.8	7.1				22	0.1	13773.5	419.1	12941	14577.6	1.8
		BLM	26	0.3	19407.3	2244.6	15321	24548.4	5.1			BLM	4	0.5	16621.6	1814	12135	22075.3	7.1				23	0.1	6228.2	478	5334.9	6854.1	1.5
		PICH	27	0.2	7064.8	694.5	5519.8	8675	2.6			PICH	5	0.2	4612.5	400.7	3637.6	5381.8	3.6				24	0.1	13353.3	845.9	12278.1	14667.1	1.5
		BLM	28	0.2	19759.5	1605.1	16433.2	23637	2.6			BLM	6	0.2	15928.1	1553.2	12861.5	18670.4	3.6				25	0.2	5381.7	578.1	4054	6319	3.2
		PICH	29	0.2	9580.3	1446.4	6604.2	11385.4	2.8		RPE1-STB-ICRF_rBLMPICHCEN-19 z8-16												26	0.2	13082.7	708.6	11817	14228	3.2
		BLM	30	0.2	23363.1	3217.5	17419.1	27701.4	2.8		Background	PICH	1	0.6	2046.3	273.1	1542.5	2566.4	9.9				27	0.1	4604.8	305	3904	5023	1.6
		PICH	31	0.2	7987.5	1036.6	5627.7	9154	2.9		Background	BLM	2	0.6	11659	1807.3	8486.1	15351.3	9.9				28	0.1	12954.7	1032.7	11537.1	14974.2	1.6
		BLM	32	0.2	21517.1	3194.7	16154.2	25451.2	2.9			PICH	3	0.2	5021.8	410	4245	5969.3	2.5		RPE1siSgo1-STB-ICRF_rBLMPICHCEN-04 (right) z13-27
		PICH	33	0.2	6541.5	636.2	5317.9	7439.1	2.7			BLM	4	0.2	20406.7	1548.9	18048.7	23047.6	2.5		Background	PICH	1	0.3	4434.4	331.8	3840.7	5186.1	4.1
		BLM	34	0.2	18347	1375.7	16263.5	20694.9	2.7			PICH	5	0.4	4062.9	445.9	3019.5	4865.5	6.6		Background	BLM	2	0.3	14000.7	522.3	12948.2	14917.2	4.1
		PICH	35	0.1	6720	617.4	5098	7468.9	1.9			BLM	6	0.4	18778.2	2249.2	13262.2	22162.1	6.6			PICH	3	0.1	5091.6	514.6	4041	6129	1.3
		BLM	36	0.1	19116.7	1558.6	15011.5	20769.8	1.9			PICH	7	0.6	4051.5	515.5	2986	6151.8	8.6			BLM	4	0.1	13153.2	512.4	12409	14196.8	1.3
	RPE1-STB-ICRF_rBLMPICHCEN-13 z6-15											BLM	8	0.6	15419.7	1787.4	11402.2	21265.2	8.6				5	0.2	6129.3	911.3	4703	7871.6	2.8
	Background	PICH	1	0.4	1629.4	91.2	1457	1822.1	6.1			PICH	9	0.1	5425.4	1304.2	3346.9	7547.2	1.4				6	0.2	14869	2234.5	12557	19063.8	2.8
	Background	BLM	2	0.4	6972.9	493.8	6357.4	8560.1	6.1			BLM	10	0.1	15547.8	2824.7	10790.7	19514.5	1.4				7	0.2	7263.8	1056	5460	8862.4	2.7
		PICH	3	0.3	3880.7	1186	2524.6	5961	4.2			PICH	11	0.2	5212.1	676.1	3591.4	6588.5	2.3				8	0.2	16136.7	1549.3	12797	19518.4	2.7
		BLM	4	0.3	9194.4	1292.6	7126	11725.1	4.2			BLM	12	0.2	17635.4	2208.3	13159.9	20648.3	2.3				9	0.1	6200.7	605	5375.2	7572.8	1.9
		PICH	5	0.2	2815.4	472.7	2281.5	4296	3.5			PICH	13	0.1	5069.3	360.6	4298	5759.1	1.5				10	0.1	15643	1108.9	13800.4	17923.5	1.9
		BLM	6	0.2	8243	1084.7	6677.7	11582.2	3.5			BLM	14	0.1	18049.6	1077	15199	19199.9	1.5				11	0.1	7423.3	1065.2	5868.6	9629.4	2.3
		PICH	7	0.2	5511	788.8	4340.3	7085.3	3.2			PICH	15	0.5	4111.3	762	2887.4	5993.9	7.2				12	0.1	16263.1	1638	14200.1	19751	2.3
		BLM	8	0.2	11426.1	1073.5	9789.2	13768.1	3.2			BLM	16	0.5	15273.9	2874	10892.5	20114.3	7.2				13	0.3	8394.1	828.2	6409.9	10309.9	3.9
		PICH	9	0.2	5138.3	1096.9	3389.1	7422.8	2.8			PICH	17	0.2	3967.6	170.4	3698.9	4358.5	2.8				14	0.3	16587	1997.7	13640.3	20879.8	3.9
		BLM	10	0.2	10113.4	1018.2	8206.3	11489.3	2.8			BLM	18	0.2	15559.4	1332.9	12859.8	17883.2	2.8				15	0.1	5138.9	567.8	4393.8	6058.8	0.9
		PICH	11	0.2	6719.9	1089.5	4637.2	9141.7	3.3			PICH	19	0.2	4651.7	284.1	4200	5571	2.6				16	0.1	13878.8	233.3	13526.9	14229.1	0.9
		BLM	12	0.2	12442.9	2237.7	8965	16619.6	3.3			BLM	20	0.2	16942.2	1333	14955.2	19658.4	2.6				17	0.1	5995.8	681.4	4654.8	7031.2	1.4
		PICH	13	0.3	7248.1	1324.2	4698.1	9115	4			PICH	21	0.1	4385.7	553.7	3404	5284.8	1.9				18	0.1	14000.1	1264.8	12705.9	15964.9	1.4
		BLM	14	0.3	13066.7	1723.7	10109.8	17112.9	4			BLM	22	0.1	16422.7	1010.1	14925.2	18844	1.9				19	0.1	6851	1118.5	4800.7	7875.9	1.4
		PICH	15	0.1	5928	581.2	4832	6706.6	1.3			PICH	23	0.3	3426.7	335.1	2946.1	4196.4	4.2				20	0.1	15777.5	1808.8	13638	19035.4	1.4
		BLM	16	0.1	12570.7	719.8	11701.6	13674.2	1.3			BLM	24	0.3	15103	1677.4	11851.3	17774	4.2
		PICH	17	0.1	7551.1	602.1	6446.7	8429.1	1.3		RPE1-STB-ICRF_rBLMPICHCEN-22 z8-14
		BLM	18	0.1	15224.2	1419.9	12068.9	17047.3	1.3		Background	PICH	1	0.3	2083.9	76.7	1908.4	2326.7	5.2
		PICH	19	0.4	4543	1136.4	3164	7029.2	6.2		Background	BLM	2	0.3	10979	618.4	9826.9	12251	5.2		RPE1siSgo1-STB-ICRF_rBLMPICHCEN-05(top) z10-33
		BLM	20	0.4	11129	1926.8	8368.5	15234.5	6.2			PICH	3	0.4	3963.2	431.6	3177.8	4877.1	6		Background	PICH	1	0.3	2566.8	170.7	2281.8	3080.5	4.9
		PICH	21	0.3	4662.1	860.6	3428.9	6966	4.9			BLM	4	0.4	14224	2171.3	8922	17837.3	6		Background	BLM	2	0.3	13198.9	919.2	11110.1	15154.4	4.9
		BLM	22	0.3	10113.7	1672	8194.7	14959.5	4.9			PICH	5	0.1	6415.6	1560.3	4418.3	9826.8	2.1			PICH	3	0.1	4627.8	1301.3	2832.4	6449.8	1.1
		PICH	23	0.3	5860.2	740.1	4749.2	7404.1	4.5			BLM	6	0.1	18314.9	4566.3	12533.8	33018	2.1			BLM	4	0.1	13372.6	1602.1	11284.9	15812.2	1.1
		BLM	24	0.3	12206.6	1469.2	9445.6	15561.8	4.5			PICH	7	0.1	4832.2	460.3	3983.4	5494.2	1.3				5	0.4	4085.5	448.9	3333.7	5153.5	6.7
		PICH	25	0.1	6765.5	1282.2	5251.2	9008.5	1.7			BLM	8	0.1	17317.3	2057.8	12198	19631.4	1.3				6	0.4	13722.2	1166.4	12034.9	16441.7	6.7
		BLM	26	0.1	14056.1	2131.5	11302.9	17252.8	1.7		RPE1-STB-ICRF_rBLMPICHCEN-23 z9-28												7	0.5	4329.1	524.1	3306	5574.5	7.6
		PICH	27	0.3	5129.7	481.5	4155.7	5990.4	4.8		Background	PICH	1	0.2	2513.7	176.6	2117	2789.9	3.8				8	0.5	14831.9	865.7	13165.8	17544.2	7.6
		BLM	28	0.3	12282.5	1305.7	9571.6	15174.6	4.8		Background	BLM	2	0.2	12244.3	683.7	11422.5	14543.5	3.8				9	0.6	4150.6	362.7	3436.3	4714.8	8.7
		PICH	29	0.1	3774.5	497.4	3008	4774	1.7			PICH	3	0.3	4796.7	543.1	3970.9	5993	4				10	0.6	14374.8	770.1	13066	16936.9	8.7
		BLM	30	0.1	9102.5	662.6	8345.6	10359.5	1.7			BLM	4	0.3	17156.1	1440.4	13875.9	19667.7	4				11	0.1	3907.8	297.4	3417.4	4406.9	1.4
		PICH	31	0.3	4784.8	753.9	3584	6379.9	5.2			PICH	5	0.5	4604.1	733.7	3273.8	6484.8	7.7				12	0.1	14833.5	524.7	13971	16012.1	1.4
		BLM	32	0.3	11065.3	848.7	8982	12561.3	5.2			BLM	6	0.5	15438.9	2426.7	11092.6	19960.2	7.7		RPE1siSgo1-STB-ICRF_rBLMPICHCEN-06 z10-26
		PICH	33	0.2	3850.2	1077	2624.7	6464.4	2.4			PICH	7	0.4	4705	687.8	3347.7	5999.5	6.4		Background	PICH	1	0.3	2661.9	103.6	2427.8	2960	4.8
		BLM	34	0.2	9423.3	1831.5	8107.6	14147	2.4			BLM	8	0.4	16081.8	2859.2	9839.8	21297.9	6.4		Background	BLM	2	0.3	17235.9	620.3	16241.3	18430	4.8
	RPE1-STB-ICRF_rBLMPICHCEN-14 z6-26											PICH	9	0.3	4487.7	712.8	3367.6	6016.2	4.9			PICH	3	0.1	5360.8	818.1	4415.4	6879	1.8
	Background	PICH	1	0.5	2794.7	191	2457.8	3270.2	7.7			BLM	10	0.3	14574.1	1718.8	10976.4	18455.9	4.9			BLM	4	0.1	15953.3	577.9	15266.1	17390.8	1.8
	Background	BLM	2	0.5	10938.3	679.3	9657	12698.3	7.7		RPE1-STB-ICRF_rBLMPICHCEN-26(bottom) z5-13												5	0.4	6216.9	630.4	4827.4	7763.7	5.8
		PICH	3	0.2	5673.7	960.9	4349.2	7303.3	2.9		Background	PICH	1	0.4	1781.1	147	1534.8	2324.8	6.7				6	0.4	18914.3	1453.2	17108.2	22702.1	5.8
		BLM	4	0.2	15055.2	2600.6	11330.3	18557.5	2.9		Background	BLM	2	0.4	8728.5	625	7673	10703.7	6.7				7	0.2	5792.9	484	5038.6	7098.9	2.8
		PICH	5	0.3	5063.6	807.2	3710.2	6926.1	5.1			PICH	3	0.2	4084.8	382.5	3373.3	4630.9	3.1				8	0.2	17577.3	1307.8	16223.3	21131	2.8
		BLM	6	0.3	14260.6	1751.3	11845	17981.1	5.1			BLM	4	0.2	12883.7	1220.5	10930.3	15966.3	3.1				9	0.6	5938	497.4	4952.7	7098	9.1
		PICH	7	0.1	5285.6	616.2	3950.1	6794.6	2.2			PICH	5	0.2	4286.9	228.7	3707.9	4698.7	2.8				10	0.6	17969	1155.9	14914	20256.5	9.1
		BLM	8	0.1	14667.7	1446.6	11275.9	16644	2.2			BLM	6	0.2	13304.1	1009.6	10732.5	14719.8	2.8				11	0.1	7624.6	857.2	6028.3	8656	1.1
		PICH	9	0.1	8664.6	1020.4	6271.5	10490.2	2.1			PICH	7	0.4	3457.9	684.4	2624.1	4984.3	6.6				12	0.1	18976.3	1019.9	16895.5	20076.6	1.1
		BLM	10	0.1	16682.8	1546.1	13476	18984.2	2.1			BLM	8	0.4	10931.3	2359	8217.6	16595.3	6.6				13	0.3	6289.5	285.2	5866.5	7034.8	4.6
		PICH	11	0.3	7765.9	1642.9	4851.2	11296.1	5.2			PICH	9	0.3	5281.9	640.6	3830	6351	5.2				14	0.3	18385.2	1021	16057.6	21599.1	4.6
		BLM	12	0.3	16746.3	2890.1	11368.9	22525.1	5.2			BLM	10	0.3	16410.2	2347.8	11377	21681.7	5.2				15	0.2	6169.5	486	5132.4	6779.7	2.3
		PICH	13	0.1	7448	466.5	5930	8066.2	2.1			PICH	11	0.1	5463.3	464.1	4733.5	6302.4	2.2				16	0.2	17860.4	1094.8	16186	20248.6	2.3
		BLM	14	0.1	17815.1	775.5	16503	19680.2	2.1			BLM	12	0.1	15644.6	1955.5	11929.6	19608.3	2.2				17	0.6	5910.8	880.2	3745	7274.2	9.6
		PICH	15	0.3	7023.7	1451.6	4589.8	8848.7	5.3			PICH	13	0.3	5622.6	398.7	4450.2	6278.3	3.9				18	0.6	17600.2	1607.8	14086.6	20938.8	9.6
		BLM	16	0.3	16275.3	2456.3	10694.7	19129.2	5.3			BLM	14	0.3	15016.1	1671.8	12289.6	18461.8	3.9				19	0.1	7065.6	948.8	5468.6	8193	1.3
		PICH	17	0.2	7626.5	1139.8	4783.8	9647.8	3.1			PICH	15	0.2	6204.9	626.3	5185.7	7611.2	2.3				20	0.1	15994.4	297.6	15458	16562.8	1.3
		BLM	18	0.2	17931.6	3211	11453.8	23549.4	3.1			BLM	16	0.2	19229.5	1922.8	16199	21957.4	2.3				21	0.2	5418.8	801.7	4472.2	6954.4	3.2
		PICH	19	0.2	4855.2	492	3814	5651.3	2.3			PICH	17	0.2	5503.6	637.7	4300	6825.5	3				22	0.2	15827	635.6	14942	17352.3	3.2
		BLM	20	0.2	13112	844.9	11229.3	14623.4	2.3			BLM	18	0.2	16037.9	1403.3	12356	18142.9	3		RPE1siSgo1-STB-ICRF_rBLMPICHCEN-07(left) z13-31
		PICH	21	0.4	6533.5	1263.6	4152.9	8507.7	6.2			PICH	19	0.1	4479.6	479.6	3121	5119.4	1.8		Background	PICH	1	0.4	3805.9	294.9	3187.8	4402.3	5.4
		BLM	22	0.4	16734.6	3170.7	11829.6	22782.2	6.2			BLM	20	0.1	13259.1	1940.5	10169	16084.7	1.8		Background	BLM	2	0.4	14551.6	621.7	13473.3	16137.3	5.4
		PICH	23	0.2	6091.8	1490.5	3920	8487.7	3.7			PICH	21	0.2	4236.7	764.5	2787.8	5971.2	3.3			PICH	3	0.1	6387.7	1320.5	4730	8773.6	1.9
		BLM	24	0.2	15980	3362.4	10826.3	20238.2	3.7			BLM	22	0.2	12545.9	1736.3	8695.4	16413.8	3.3			BLM	4	0.1	15652.5	1860.2	13266.6	18477.7	1.9
		PICH	25	0.1	5122.4	580.3	4124	6294.1	2														5	0.1	6528.5	1163.1	4913.8	8427	1.3
		BLM	26	0.1	15051.5	2208.1	11373	18790.3	2														6	0.1	15387.3	1594.4	13039.9	17919.7	1.3
		PICH	27	0.2	6257.9	746.1	4434.1	7218	3.7														7	0.3	7071.2	1007.7	5403.5	9382.2	4.5
		BLM	28	0.2	15308.7	1669.3	12228	18052.3	3.7														8	0.3	15589.3	1121	13984.4	18485.7	4.5
		PICH	29	0.2	7174.5	1514.2	4983.2	9368.2	2.4														9	0.2	6157.6	338.4	5376.7	6890.8	3.2
		BLM	30	0.2	15621.1	2754.7	12209.8	19655.9	2.4														10	0.2	15356.2	772.9	14218.8	16723	3.2
		PICH	31	0.1	7660.4	803.2	6815.3	9318.6	1.7														11	0.3	6343.4	1672.8	4635	10046.9	4.2
		BLM	32	0.1	19366.3	1610.6	17555.9	22352.1	1.7														12	0.3	15846.4	1071.8	13792.5	17857.4	4.2
		PICH	33	0.2	6602.8	718.5	5094.7	7786.2	2.7														13	0.1	7764.8	929.5	5041	8647.3	1.6
		BLM	34	0.2	16924.7	1969	13069	19630.6	2.7														14	0.1	16800.9	1248.7	14183.2	18345.8	1.6
		PICH	35	0.3	6431.3	1047.2	4483	7750.2	3.9														15	0.2	7630.5	919.2	5517.4	8893.9	2.5
		BLM	36	0.3	16608	2140.9	12752	20609.7	3.9														16	0.2	17632.6	2095.9	14606.1	21151	2.5
		PICH	37	0.3	6103.4	1666.7	3999.3	9183.8	5.3														17	0.1	6765.7	655.4	5551.5	7509.9	1.2
		BLM	38	0.3	15803.2	2434.7	12140.4	22154.6	5.3														18	0.1	15248.6	617.1	13840.6	15881.3	1.2
	RPE1-STB-ICRF_rBLMPICHCEN-16 z8-22																				RPE1siSgo1-STB-ICRF_rBLMPICHCEN-08 z5-29
	Background	PICH	1	0.4	2117.6	156.8	1805.8	2376.6	5.5												Background	PICH	1	0.2	2490.8	84	2313.5	2670.3	3
	Background	BLM	2	0.4	9512.6	936.9	8014	11517.7	5.5												Background	BLM	2	0.2	12014	716.2	10965	13876.6	3
		PICH	3	0.4	5454.9	1484.1	3790	10221.4	5.5													PICH	3	0.3	4739.3	684.6	3701.5	6553.1	4.3
		BLM	4	0.4	14411	2563.6	9767	21018.9	5.5													BLM	4	0.3	13372.1	1031.7	11945.5	16117.2	4.3
		PICH	5	0.3	4725.4	593.4	3615.8	5485	4.3														5	0.1	5626.9	400	4868.5	6372.4	2.3
		BLM	6	0.3	14950.9	1931.1	10976	17873.1	4.3														6	0.1	13914	1684.8	12128	18088.5	2.3
		PICH	7	0.2	4352.4	459.8	3701	5493.4	2.9														7	0.1	7134.5	872.2	5521	8705.2	2.1
		BLM	8	0.2	13420.4	795.7	12060.2	14984.2	2.9														8	0.1	16087.5	980.6	14480.9	17900.5	2.1
		PICH	9	0.4	5737.1	1211.2	3548.1	8890.7	6.5														9	0.2	7376.4	687	6276.7	8558.3	2.9
		BLM	10	0.4	14128.1	2052.7	10137.6	19203.3	6.5														10	0.2	16355.3	1077.5	14572.8	18734.5	2.9
		PICH	11	0.2	6586.8	784.7	5166	7959.5	3														11	0.1	7077.9	857.4	5343.7	7906.5	0.9
		BLM	12	0.2	16423.2	2151.8	11575.8	19897	3														12	0.1	16288.4	1712	13489.1	18520.2	0.9
		PICH	13	0.2	6487	525.4	5229.2	7749.8	2.6														13	0.2	8542.7	1199.5	5357	10548.2	3.1
		BLM	14	0.2	18376.5	1758.7	14073.7	21824.8	2.6														14	0.2	17410.3	1999.8	12862	21934.3	3.1
		PICH	15	0.3	5616	761.1	4082.5	7070.2	5														15	0.1	7420.3	721.4	5880.5	8855.1	2.2
		BLM	16	0.3	15854.2	2504.3	10703	19894.8	5														16	0.1	15576.5	1101.1	13001	17335.5	2.2
		PICH	17	0.3	5959.1	582.7	4777.3	7175.8	5.2														17	0.3	4206.1	299.6	3535.5	4866.2	4
		BLM	18	0.3	16377.6	2200.4	12722	20404.1	5.2														18	0.3	10998.3	654.2	9531.1	12241.4	4
		PICH	19	0.1	7545.5	712.1	6231.7	8836.4	1.8														19	0.1	4224.6	263.7	3741	4829.9	2.1
		BLM	20	0.1	18860.2	1468.6	16780.2	21240.8	1.8														20	0.1	11052.3	705.7	10143.6	12622.8	2.1
		PICH	21	0.3	5431.9	390.9	4850	6390.9	4.3														21	0.2	4969.9	418.7	4314.5	5738	3.4
		BLM	22	0.3	16647.6	2273.3	11698.5	21267.3	4.3														22	0.2	12805.2	1284.7	11477.4	16802.6	3.4
		PICH	23	0.1	5651	457.5	4723	6286.5	1.4												RPE1siSgo1-STB-ICRF_rBLMPICHCEN-09 z6-17
		BLM	24	0.1	16696.6	1066.3	13744.5	17998	1.4												Background	PICH	1	0.4	2593.8	75.8	2465.8	2781.4	6.2
		PICH	25	0.2	4350.6	550.5	3588.7	5316.6	2.4												Background	BLM	2	0.4	10985.8	498.3	10006.8	12093.7	6.2
		BLM	26	0.2	13606.7	1558.7	11220.3	16735	2.4													PICH	3	0.4	5460.1	971.5	3679.6	7411.4	5.5
		PICH	27	0.3	5170.8	478.1	4049.7	5943	5													BLM	4	0.4	10029	787	8783.2	12478.2	5.5
		BLM	28	0.3	14875.2	2081.3	9785.7	18630.9	5														5	0.3	4572.5	495.8	3527.8	5248.6	5
		PICH	29	0.2	5560.9	448.8	4468.3	6503.9	3														6	0.3	9768.2	480	8743.5	11545.8	5
		BLM	30	0.2	15257.4	1033.4	11968.5	16964.1	3														7	0.1	4576.5	774.4	3637.4	5900.3	1.8
		PICH	31	0.1	4141.1	354	3463.6	4805.2	1.4														8	0.1	9991.5	706.7	9179.1	11791.4	1.8
		BLM	32	0.1	12265.4	955.4	10823.3	14062.2	1.4														9	0.1	6123.6	574.2	4807.5	6860.5	1.8
	RPE1-STB-ICRF_rBLMPICHCEN-18 z10-28																						10	0.1	11258.3	478	10489.9	12112.9	1.8
	Background	PICH	1	0.4	2333.8	117.6	2051.7	2584.8	5.8														11	0.2	6375.7	859.8	4468.8	7723.7	2.9
	Background	BLM	2	0.4	10658.9	1115.2	8287.3	13359.6	5.8														12	0.2	12374.7	1230.9	10058.5	14632.5	2.9
		PICH	3	0.1	4408.8	883.8	3180	5548.4	1.3														13	0.1	5599.9	428.6	4470	6215.2	1.5
		BLM	4	0.1	12367.2	1155.4	10864.5	14276	1.3														14	0.1	12424.5	1291.8	9843	14239.2	1.5
		PICH	5	0.2	5374.8	483.2	3799	5997	3.1														15	0.2	7060.4	1023.4	5353.5	8890.6	3.1
		BLM	6	0.2	14567.8	1940.9	11697.3	18276.6	3.1														16	0.2	11774.8	1709	9865.2	16699.3	3.1
		PICH	7	0.2	5952.5	452.1	4808.5	6721.9	2.6														17	0.1	6948.1	898	4716	8409.1	2.1
		BLM	8	0.2	14869.6	1232.7	11658	16791	2.6														18	0.1	10795.7	393.9	9590	11434.9	2.1
		PICH	9	0.3	5001.5	607	4020	6862.3	5														19	0.1	5797.3	660.5	4672.6	6738.2	1.4
		BLM	10	0.3	15472.7	1434.8	12790.1	18493.6	5														20	0.1	10067	405.7	9738.2	11337	1.4
		PICH	11	0.1	4875.2	885.1	3163.5	6219.3	1.8														21	0.1	5495.1	567.9	4322.6	6183.3	1.9
		BLM	12	0.1	12871.5	1035.6	10740	14960.4	1.8														22	0.1	10397.1	316.8	9886	11187.5	1.9
		PICH	13	0.1	5353.4	745.8	4185.5	6587.2	1.7														23	0.1	5080.3	662.6	4105.6	6150.3	1.9
		BLM	14	0.1	13372.8	1535.2	9782	14571.7	1.7														24	0.1	10385.2	705.6	9307.7	11409	1.9
		PICH	15	0.1	7504.3	1460.7	4950.1	9959	1.1														25	0.2	4322.2	665.3	3334.2	5580.2	2.5
		BLM	16	0.1	19072.6	2355.3	13817.2	22421.8	1.1														26	0.2	9832.1	435.8	9165.1	10900.7	2.5
	RPE1-STB-ICRF_rBLMPICHCEN-21 z9-25																						27	0.2	4302.2	390.9	3717	4883.1	3
	Background	PICH	1	0.3	2662.8	180.6	2277.3	3008.1	4.6														28	0.2	9854.7	428.6	9231.5	10668.1	3
	Background	BLM	2	0.3	11591.4	931.6	10271.8	13861.5	4.6														29	0.1	4736.4	289	4100	5223.8	1.2
		PICH	3	0.3	5186.7	720.3	3793.9	7916.5	4.7														30	0.1	10077	930	9134.9	11960.3	1.2
		BLM	4	0.3	15270.1	2103.2	11413.3	20400	4.7												RPE1siSgo1-STB-ICRF_rBLMPICHCEN-10 z13-21
		PICH	5	0.2	5226.4	482.3	3988.5	6216.6	3.1												Background	PICH	1	0.2	2279.6	101.4	2144.2	2520.2	3.8
		BLM	6	0.2	14565.4	2264.7	10447.5	18669.7	3.1												Background	BLM	2	0.2	12208.1	920.5	10323	13866.9	3.8
		PICH	7	0.2	5952.5	935.8	4066	7588	3.2													PICH	3	0.1	3799	370.9	3171	4293	1.6
		BLM	8	0.2	15301.9	1484.2	12089	18239.6	3.2													BLM	4	0.1	12014.2	443.4	11135	12568	1.6
		PICH	9	0.4	5943.2	735.5	4235.3	7420.6	5.9														5	0.1	4383.6	157.8	4007	4609.9	1.1
		BLM	10	0.4	16713.3	1937.9	12874	21007.9	5.9														6	0.1	13354.8	442.6	12717.1	14049.8	1.1
		PICH	11	0.3	8098.8	1675.3	4874	11013.2	3.9														7	0.2	4131.5	229.7	3439	4532	2.7
		BLM	12	0.3	19357.1	3709.7	10282	24548.6	3.9														8	0.2	14222.7	944.6	12950.9	16412.5	2.7
		PICH	13	0.1	5427.3	827.7	4334	6979.5	2.1														9	0.4	4911.7	466.8	3837.1	6076.6	6.5
		BLM	14	0.1	14716	1998.7	11475	18838.5	2.1														10	0.4	14854.2	1115.9	13384.8	18489	6.5
		PICH	15	0.3	5698.1	880.4	3918.3	7026.9	4.3														11	0.1	4510	375.2	3942.7	5072.3	1.2
		BLM	16	0.3	16443.2	2469.1	11471.5	21493.5	4.3														12	0.1	14438	709.1	13643	15797.8	1.2
		PICH	17	0.2	6471.5	699.9	5180	8361.7	3.5														13	0.1	4160.3	139.8	3941.4	4426.9	2.1
		BLM	18	0.2	16639.6	2235.8	11929	20687.6	3.5														14	0.1	14650.6	968.2	13468	16646.2	2.1
		PICH	19	0.2	6330.5	979.3	4568	7792.8	3.5														15	0.4	4132.6	370.7	3408.5	5070.7	6.1
		BLM	20	0.2	14808.4	1660.1	10905	17650.2	3.5														16	0.4	13771.4	873.1	12555.9	16643.6	6.1
		PICH	21	0.3	5677.5	1272.6	2848	7508.5	5.3												RPE1siSgo1-STB-ICRF_rBLMPICHCEN-11 z1-12
		BLM	22	0.3	14442.6	2710.2	9220	18295.8	5.3												Background	PICH	1	0.3	2147.5	122.5	1925	2358.9	4.1
		PICH	23	0.3	6239.1	1783.9	2912.7	9096.2	4.1												Background	BLM	2	0.3	10421.1	719.9	9597.8	13046.7	4.1
		BLM	24	0.3	14031.8	2923.8	9571.4	20932.5	4.1													PICH	3	0.1	3915.7	559.7	3045.5	5026.3	1.2
		PICH	25	0.2	4811.5	421.1	3413.9	5524.9	3													BLM	4	0.1	11216.9	751.6	10259.5	12760	1.2
		BLM	26	0.2	13515	1228	10665.3	15588.9	3														5	0.1	5437.2	790.9	3884.9	6358.3	1
		PICH	27	0.4	4260.2	648.2	2724.5	5430.2	6.2														6	0.1	13975.5	1746	11238.1	16448.8	1
		BLM	28	0.4	11182.5	1227.4	8697.4	13501.3	6.2														7	0.1	4498.7	630.8	3560.4	5733	1.6
		PICH	29	0.4	3984.6	954.2	2584.4	6543	5.9														8	0.1	12862.3	1377.2	11009.9	15304.6	1.6
		BLM	30	0.4	11561.1	2205.6	9122.9	18506.1	5.9														9	0.1	5256.1	795.9	4216.9	6504.4	1
		PICH	31	0.4	3818.7	716.6	2375.1	5385.1	6.3														10	0.1	13077	826.2	12103.3	14393.9	1
		BLM	32	0.4	11279.2	1660.6	8954.1	15165.5	6.3														11	0.1	5982	951.2	4183.5	7535.5	1.1
		PICH	33	0.1	4113.6	671.8	2788.5	5030.5	2														12	0.1	13096.2	1511.6	10707.5	15270	1.1
		BLM	34	0.1	11292.2	1257.5	9269.3	13690.3	2														13	0.1	4327.5	749.3	3189.8	5691.4	1.5
	RPE1-STB-ICRF_rBLMPICHCEN-24 z10-28																						14	0.1	11519	844.1	10002.8	12721.8	1.5
	Background	PICH	1	0.4	2669.5	190.1	2375.9	3213.9	6.7														15	0.3	3631	324.3	2993	4213.3	4.5
	Background	BLM	2	0.4	11137.4	1093.2	9564	14612.2	6.7														16	0.3	12396	777.3	11381.9	14861.1	4.5
		PICH	3	0.2	4603.6	852.5	3513	6401.9	3.3														17	0.2	4363.3	957.7	3111.1	6045.4	2.4
		BLM	4	0.2	12772.4	1441	10955.3	17011.2	3.3														18	0.2	12299.1	801	10888	14001.5	2.4
		PICH	5	0.2	5501.7	823.7	4137.2	6809.5	2.4														19	0.1	3790.7	569.5	2911.2	4645.2	1.8
		BLM	6	0.2	13752.6	1034.9	12150.8	15855.4	2.4														20	0.1	12415.8	862.7	10632.3	13700.3	1.8
		PICH	7	0.2	5966.3	943.4	4127	7140	2.4														21	0.1	4402.3	515.8	3558	5445	2
		BLM	8	0.2	14406.9	1517.2	12182.6	16774.5	2.4														22	0.1	10954.4	348.2	10130.5	11554.1	2
		PICH	9	0.1	5420.3	412.6	4824.9	6208.2	2														23	0.2	4040.8	494.8	3272.5	5185.7	3.2
		BLM	10	0.1	13635.8	797.7	12595.9	15159.4	2														24	0.2	11607.2	862.5	10487.2	13776.1	3.2
		PICH	11	0.2	5892.6	506.5	4995.5	6940.6	3														25	0.1	4412.6	569	3611.7	5381	0.9
		BLM	12	0.2	14601.3	965.4	12789.6	16520	3														26	0.1	13722.8	1031.8	11722.5	15273.2	0.9
		PICH	13	0.2	5595.4	281.3	4780.5	6110.1	2.3														27	0	4106.6	748.9	2813	4910.5	0.7
		BLM	14	0.2	13377.1	790.5	12232.2	15194.9	2.3														28	0	10643	361.2	10193.9	11167	0.7
		PICH	15	0.2	5548.5	708.3	4268	6725.7	3.3														29	0.1	3750.6	542.9	2950.2	4755.9	1.4
		BLM	16	0.2	13352.8	888	12164	15210	3.3														30	0.1	11026	328.4	10400	11538.4	1.4
		PICH	17	0.2	6512.8	591.4	5719.6	7672.8	2.4												RPE1siSgo1-STB-ICRF_rBLMPICHCEN-12 z9-28
		BLM	18	0.2	14098.1	787.4	12579.7	15348.7	2.4												Background	PICH	1	0.3	2863.3	179.9	2549.2	3248.9	4.6
		PICH	19	0.1	6382	527	5741.7	7435.5	1.1												Background	BLM	2	0.3	13576.6	1042.9	11729.8	16636.1	4.6
		BLM	20	0.1	13464.4	408.9	12843.5	14508.8	1.1													PICH	3	0.1	5313.8	722.1	3830.6	6843.2	2.2
		PICH	21	0.1	6328.7	466.2	5336	6992.2	1.2													BLM	4	0.1	12699.7	1533.5	10484.8	16091.7	2.2
		BLM	22	0.1	13548.1	614.2	12212.5	14494.8	1.2														5	0.2	5869	1144.3	4229.7	8162.5	2.9
		PICH	23	0.1	6177.8	933.6	5012.9	7543.9	1.4														6	0.2	11565.8	1139.6	10132.5	14044.5	2.9
		BLM	24	0.1	13961.5	656.4	12548.9	14947.8	1.4														7	0.1	6585.2	1558.7	4480.3	9172.9	1.6
		PICH	25	0.2	6135.9	367.7	5478	6977.8	3.3														8	0.1	11844.2	1339.5	9978	14549.8	1.6
		BLM	26	0.2	13639.2	697.8	12266	14914.5	3.3														9	0.1	7574	763.5	5741	8684.9	1.5
		PICH	27	0.1	8308.4	1581.5	5911.6	10843.4	2.1														10	0.1	14358.2	2212.1	11677.5	19422.3	1.5
		BLM	28	0.1	16236.7	973.6	14780.3	18557.5	2.1														11	0.2	5436.8	922	4164.2	7272.9	3
		PICH	29	0.1	5865.2	468	5159.7	6853.4	2														12	0.2	12233.8	1183.8	10778.7	15075	3
		BLM	30	0.1	14764.9	833	13653	16561.5	2														13	0.1	5629.5	439.9	4727.5	6207.9	1.2
		PICH	31	0.2	5838.2	701.7	4985.6	7724.9	3.3														14	0.1	12686.8	1036.9	11108.2	14000.3	1.2
		BLM	32	0.2	15196.8	1205.5	13575.6	19237	3.3														15	0.1	6988.3	736.8	5749	7866.3	0.9
		PICH	33	0.1	8314.4	1123.9	5985.8	10413.7	1.6														16	0.1	12613.4	616.5	11411	13484.1	0.9
		BLM	34	0.1	14779.8	1502.8	12981.1	17215.6	1.6														17	0.1	8026.9	1357	5170	9519.3	1.2
		PICH	35	0.2	7010.3	1186.8	5189	9223.8	3														18	0.1	12109.3	1002.6	10236	13568.8	1.2
		BLM	36	0.2	14415.9	955	12867.8	16223.3	3														19	0.1	5769.9	739.4	4426.6	7183.9	1.8
		PICH	37	0.1	5499.4	578.7	4417	6137.7	1.4														20	0.1	11537.9	1007.3	10418.3	13832.4	1.8
		BLM	38	0.1	11980.4	378.6	11396	12599.7	1.4														21	0.1	6041.9	510	5196.1	6925.2	2.1
		PICH	39	0.2	6350.7	619.8	5163	7800	3.3														22	0.1	12810.3	1245.9	11058.1	15233	2.1
		BLM	40	0.2	13597.9	1751.8	11604.1	19907.8	3.3														23	0.2	5691.8	1001.2	4695.5	7984.1	2.8
		PICH	41	0.1	4572.3	328.2	3617.5	5039.9	1.9														24	0.2	12121.2	1238.1	10929.4	15076.3	2.8
		BLM	42	0.1	11274.4	852.8	10260.4	12986.4	1.9														25	0.1	6800.6	752.8	5340.9	8135.8	2
	RPE1-STB-ICRF_rBLMPICHCEN-26 (top) z13-36																						26	0.1	13044.8	646	11578	14282.2	2
	Background	PICH	1	0.3	4117	781.9	2922.5	5718.3	4.1														27	0.2	6149.6	1174.6	4630.5	8643.5	2.8
	Background	BLM	2	0.3	13760.4	1088.8	12523.6	16451.9	4.1														28	0.2	11930.1	1081.9	10517.8	14232.2	2.8
		PICH	3	0.1	4613.2	200.1	4112.4	4952.8	2														29	0.1	6288.2	736.4	5516.5	7556	1.3
		BLM	4	0.1	15881.7	1345	14420.4	19573.5	2														30	0.1	13879.2	1763.6	11111.1	16683.6	1.3
		PICH	5	0.2	4891.3	278.9	4287.7	5521.3	3												RPE1siSgo1-STB-ICRF_rBLMPICHCEN-13(left) z14-36
		BLM	6	0.2	15211.2	1375.9	12418.2	17696.7	3												Background	PICH	1	0.2	3293.3	257.1	2869.2	3727.8	2.9
		PICH	7	0.1	5687.5	733.3	4490.1	6633.6	1.9												Background	BLM	2	0.2	13492.9	1127.3	11931.2	15808.4	2.9
		BLM	8	0.1	15783.6	1462.5	13272.2	17741.9	1.9													PICH	3	0.1	4178.8	361.6	3403	4699.9	1.6
		PICH	9	0.3	6586.8	623.2	4813.2	7625.7	4.6													BLM	4	0.1	14689.9	1021.5	12954.5	16395.9	1.6
		BLM	10	0.3	18006.7	1530	14834.2	22604.6	4.6													PICH	5	0.3	5540.4	439	4293	6444.1	4.8
		PICH	11	0.3	7552.5	1210.7	5218	9558.6	4													BLM	6	0.3	16665.6	1034.6	14969.2	19596.8	4.8
		BLM	12	0.3	19065.2	2292.8	15318.8	23405.3	4													PICH	7	0.3	5292.8	407.9	4646.2	6294.3	4.3
		PICH	13	0.3	8344.5	1518.5	5438.2	10252.2	4.1													BLM	8	0.3	16341.4	699.9	15228	18019	4.3
		BLM	14	0.3	21779.5	3698.6	15078.5	26707.2	4.1													PICH	9	0.2	5012.2	249.1	4392.5	5417.2	3.3
		PICH	15	0.2	7738.8	881.5	5908.4	9002.5	3													BLM	10	0.2	14357.7	767.7	13312	16650.1	3.3
		BLM	16	0.2	19881.2	2128.7	15387.8	22643.1	3													PICH	11	0.3	4717.9	415.9	3917.4	5747.9	5.1
		PICH	17	0.1	8001.6	362.3	7416.8	8647.9	1.6													BLM	12	0.3	14848.2	1314.5	12924.3	17318.6	5.1
		BLM	18	0.1	20652.7	1391.2	18835.1	23323.5	1.6													PICH	13	0.1	4429.9	382	3975.1	5248.9	1.6
		PICH	19	0.3	8767.4	1554.2	6238	12281.8	3.9													BLM	14	0.1	14074.9	700.5	12968.8	15529.5	1.6
		BLM	20	0.3	19651.8	2826.9	15080.2	28038.4	3.9													PICH	15	0.2	3551.2	247.5	3189.8	4122.5	3.1
		PICH	21	0.1	10254.8	828	8813	11883.6	1.8													BLM	16	0.2	11807.6	542	10778.2	12727.1	3.1
		BLM	22	0.1	22864.5	2470	19629.1	28891.3	1.8												RPE1siSgo1-STB-ICRF_rBLMPICHCEN-13(rigth) z20-34
		PICH	23	0.1	7788.8	871.1	6032.7	9317.3	2.1												Background	PICH	1	0.2	2651	86.6	2505.7	2859	2.7
		BLM	24	0.1	17924.8	932.1	16576.4	19727.2	2.1												Background	BLM	2	0.2	12417.7	790	11691.1	14279.4	2.7
		PICH	25	0.2	6216.3	433.3	5323.4	6958	3.1													PICH	3	0.1	4948.5	597	3934	6091.9	2.1
		BLM	26	0.2	16161.1	681.5	14873.8	18022.9	3.1													BLM	4	0.1	11588.5	764.2	10569.7	13112.3	2.1
		PICH	27	0.4	5469.9	353.8	4770.6	6454.6	5.5													PICH	5	0.2	6603.1	1102.1	4715	8472.9	2.5
		BLM	28	0.4	17330.7	1191.3	15196.3	20248.4	5.5													BLM	6	0.2	13255.9	999	12025.2	16155.8	2.5
		PICH	29	0.1	6212.3	339.5	5754.4	6875	2.3													PICH	7	0.2	4428.9	453	3819.8	5558.1	2.3
		BLM	30	0.1	17795.8	901.2	16363.9	19693.3	2.3													BLM	8	0.2	12272.9	1029.6	11097.7	14723.1	2.3
		PICH	31	0.2	6572	710.1	5377	7933.1	3.7												RPE1siSgo1-STB-ICRF_rBLMPICHCEN-14 z12-20
		BLM	32	0.2	18376.7	1268.6	14801.2	20327.9	3.7												Background	PICH	1	0.1	2730.4	101.8	2596	2918.7	1.5
		PICH	33	0.2	7623.2	1092.3	5211.7	9096.2	3.4												Background	BLM	2	0.1	13196.3	1147.5	11727.9	14881.7	1.5
		BLM	34	0.2	19693.7	1504.3	15510.9	22538.7	3.4													PICH	3	0.6	4224	482.8	3501	5826.5	9.4
		PICH	35	0.2	7526	963.1	5659.3	8856.5	3													BLM	4	0.6	13133	685.6	11899.7	14781.2	9.4
		BLM	36	0.2	19670.8	1632.3	15411	21956.1	3													PICH	5	0.2	6019.6	660.5	5020.8	7173.8	2.4
		PICH	37	0.2	7130.2	1128.2	4947.4	9045.6	3.8													BLM	6	0.2	12642.6	447.7	12030.3	13724.8	2.4
		BLM	38	0.2	18678.2	2619.6	14430.8	22818.6	3.8													PICH	7	0.2	4826.3	355	4190.5	5579.2	3.6
		PICH	39	0.2	7936.1	991.4	5613.1	9527.1	3.6													BLM	8	0.2	12937	699.4	12094.3	14481.9	3.6
		BLM	40	0.2	20015.3	2305.1	14256.5	22934.9	3.6												RPE1siSgo1-STB-ICRF_rBLMPICHCEN-15 (left, top)
		PICH	41	0.2	6897.9	816.6	4002.3	7934	3.5												Background	PICH	1	0.3	2680.5	161.7	2435	3019.7	4.6
		BLM	42	0.2	19086.1	2090.7	13789.4	23873.8	3.5												Background	BLM	2	0.3	11853.4	919.1	10382.6	13898.3	4.6
		PICH	43	0.1	5892.9	592.1	5064.2	7385.4	2													PICH	3	0.1	3880.2	297	3422.1	4421.9	2.3
		BLM	44	0.1	16890.2	1214.2	14515.4	18797.1	2													BLM	4	0.1	11385.5	203	11113	11801.8	2.3
		PICH	45	0.1	5624.1	754.9	4410.4	6703.5	2.2													PICH	5	0.6	4861.8	531	3707.4	6135.8	9.8
		BLM	46	0.1	15961.5	708.4	14696.6	17004.1	2.2													BLM	6	0.6	12192.4	889.1	10217.2	14314.8	9.8
		PICH	47	0.1	5127	638.3	4354.8	6290.2	2.3													PICH	7	0.3	4656.1	401.5	4084.1	6331.2	4.9
		BLM	48	0.1	16496.4	1412.5	14164.4	18715.8	2.3													BLM	8	0.3	12102.3	467	11109.2	13597.8	4.9
	RPE1-STB-ICRF_rBLMPICHCEN-29 z9-22																					PICH	9	0.3	4626.6	271.9	4152.2	5154.6	3.9
	Background	PICH	1	0.3	2446.7	316.3	1750.4	2990.7	5													BLM	10	0.3	11742.9	485.3	10841.4	12742.2	3.9
	Background	BLM	2	0.3	8343.6	1047.2	6547.4	9712.1	5													PICH	11	0.2	4308.6	393.1	3743.3	5007.8	3.4
		PICH	3	0.2	3140.5	404.4	2563.3	3919.3	2.6													BLM	12	0.2	11286	392.6	10654.9	12148.2	3.4
		BLM	4	0.2	7790.5	729.9	6744.2	9597.2	2.6													PICH	13	0.1	4520.4	411.6	3877.7	5082.4	1.6
		PICH	5	0.1	3419.7	244.1	3077.4	4176	1.8													BLM	14	0.1	10552.1	153.5	10298.4	10846.7	1.6
		BLM	6	0.1	7218.9	494.9	6854	9075	1.8													PICH	15	0.2	4628.6	489.6	3919.1	5747.6	3.2
		PICH	7	0.1	3797.3	457	3281.6	4645.4	1													BLM	16	0.2	11884	678	10913.9	13065.2	3.2
		BLM	8	0.1	7727.8	425.4	7131	8400.5	1												RPE1siSgo1-STB-ICRF_rBLMPICHCEN-16 z10-28
		PICH	9	0.1	5581.6	987.5	3448.1	7078.1	2												Background	PICH	1	0.3	2864.1	134.8	2634.3	3281.7	3.9
		BLM	10	0.1	10316.7	1546.4	7788.5	12931.8	2												Background	BLM	2	0.3	13135.4	1022.1	11698.7	15001.2	3.9
		PICH	11	0.2	4228.1	304.5	3720.5	4975.6	3.5													PICH	3	0.1	4902.7	270.9	4537.2	5360.5	0.9
		BLM	12	0.2	9077.3	653.9	7918.2	10426	3.5													BLM	4	0.1	13559.7	485	12338	14133.7	0.9
		PICH	13	0.1	4131.9	691.6	3298.5	5356	1.6													PICH	5	0.1	4863	204.7	4486.7	5247.3	0.8
		BLM	14	0.1	9945.2	1587.8	7943	12948.8	1.6													BLM	6	0.1	14031.8	366.7	13474.7	14623.8	0.8
		PICH	15	0.1	5387.6	836.8	4068.5	6914.4	1.8													PICH	7	0.1	5671.5	814.4	3767.4	6664	1.5
		BLM	16	0.1	9456.8	932.6	8109.9	10974.6	1.8													BLM	8	0.1	15117	1292.1	12973	17619.8	1.5
		PICH	17	0.2	4662.3	662.1	3575	5581.5	2.9													PICH	9	0.1	6548.4	357.8	5881	7237.8	1.4
		BLM	18	0.2	9350.4	1190.8	7591.5	11855.5	2.9													BLM	10	0.1	15871.8	1327.7	14147	18345.3	1.4
		PICH	19	0.2	3730.7	284.2	3230.2	4391	2.6													PICH	11	0.4	5101.5	988.6	3637.2	7146.4	6
		BLM	20	0.2	8576.7	409.5	7787.1	9417.6	2.6													BLM	12	0.4	13825.8	1405.4	11881.1	17097	6
		PICH	21	0.2	4974.4	641.8	3243.5	5868.3	2.9													PICH	13	0.2	6240	379.3	5196.5	6928.4	2.8
		BLM	22	0.2	9377.4	886.1	7774	11377.8	2.9													BLM	14	0.2	15262.8	1076.2	13588.5	17402.6	2.8
		PICH	23	0.1	4527.9	601.6	3483.9	5538.3	2.1													PICH	15	0.1	4277.8	436.1	3451.1	5002.8	1.6
		BLM	24	0.1	9186.4	927.9	7334.9	10904.8	2.1													BLM	16	0.1	12643.9	594.8	11561.7	13420.4	1.6
																					RPE1siSgo1-STB-ICRF_rBLMPICHCEN-17 z13-28
																					Background	PICH	1	0.3	2432.8	156.1	2243.9	2737.7	4.8
																					Background	BLM	2	0.3	11917.2	877.4	10499	13808.9	4.8
																						PICH	3	0.6	5191.9	731.1	3975	6945.8	9.4
																						BLM	4	0.6	14576.7	1171.9	12169.3	16854.4	9.4
																						PICH	5	0.2	4543.3	496.4	3929.8	5710.7	3.2
																						BLM	6	0.2	14136	802.2	12823.8	16008	3.2
																						PICH	7	0.7	4485.9	565.7	3322.5	5942.8	10
																						BLM	8	0.7	14221.7	1537.4	10426.8	17036.3	10
																						PICH	9	0.4	5040.2	525.5	4042.4	6174.8	6.3
																						BLM	10	0.4	14488.7	781.4	12849.6	16313	6.3
																						PICH	11	0.3	4725.8	488.6	3979	5899	4.8
																						BLM	12	0.3	13726.1	670.3	12616.8	15688.9	4.8
																						PICH	13	0.3	3451.4	300.4	2824.4	4059.1	4.1
																						BLM	14	0.3	10531.3	1342.2	8363	13493	4.1
																						PICH	15	0.4	2577.1	153.2	2339	2895.1	5.9
																						BLM	16	0.4	11518	1402.9	9298.7	14527.2	5.9
																					RPE1siSgo1-STB-ICRF_rBLMPICHCEN-18 z12-28
																					Background	PICH	1	0.2	2439.1	93.4	2219.6	2691.4	3.3
																					Background	BLM	2	0.2	13077.3	643.2	12159.8	14867	3.3
																						PICH	3	0.3	3913.8	213.8	3491	4299.1	4.1
																						BLM	4	0.3	14166.2	1439.9	12118.3	17984.1	4.1
																						PICH	5	0.4	3962.8	322.9	3254	4620.8	6
																						BLM	6	0.4	14675.9	665.3	13509.3	16889.7	6
																						PICH	7	0.3	3919	281.9	3205	4533.5	3.9
																						BLM	8	0.3	14253.4	1616.4	12049	17354.2	3.9
																						PICH	9	0.2	4191.1	403	3508.6	5210.3	2.8
																						BLM	10	0.2	14696.5	408.1	13797.2	15320.7	2.8
																						PICH	11	0.2	4944.4	561.2	4360.1	6700.1	2.5
																						BLM	12	0.2	15426.6	653.5	13815	16756.6	2.5
																						PICH	13	0.6	4243	574.2	3359.9	6669.3	9.5
																						BLM	14	0.6	14839	1005.5	12493.9	17842.4	9.5
																						PICH	15	0.2	3452.5	266.7	2877.8	3894.7	2.3
																						BLM	16	0.2	12676.5	831.5	11817.6	14540	2.3
																						PICH	17	0.2	3619.3	212.9	3185	4074	3.8
																						BLM	18	0.2	14864.1	824	13192	16220	3.8
																						PICH	19	0.3	3207.3	334.9	2680	4053	4.3
																							20	0.3	12700	560.1	11819.3	14049.9	4.3
																					RPE1siSgo1-STB-ICRF_rBLMPICHCEN-19 z12-24
																					Background	PICH	1	0.3	2927.4	152.3	2649.4	3182	5
																					Background	BLM	2	0.3	12282.2	741.2	11193	13810.2	5
																						PICH	3	0.2	5151.3	726.5	3897	6342.6	2.9
																						BLM	4	0.2	13578.4	1202.5	11570	15479	2.9
																						PICH	5	0.2	3924.1	579.9	3329.8	5381.6	3.4
																						BLM	6	0.2	12083.1	636.5	10844.1	13706.2	3.4
																						PICH	7	0.2	5036.5	284	4281.9	5432.5	2.6
																						BLM	8	0.2	13000.1	653.6	11861	14628.7	2.6
																						PICH	9	0.2	4763.1	378.7	3690.2	5349.7	2.6
																						BLM	10	0.2	13416.6	1239.6	11132.9	16426.5	2.6
																						PICH	11	0.1	4785.5	762.8	3605	5650.4	0.9
																						BLM	12	0.1	13461.5	1066.4	12369.7	15340.3	0.9
																						PICH	13	0.1	4154.6	264.8	3720.9	4631.2	0.8
																						BLM	14	0.1	12464.5	575.3	11664.3	13244.3	0.8
																					RPE1siSgo1-STB-ICRF_rBLMPICHCEN-20 (top) z15-35
																					Background	PICH	1	0.4	2246.9	233.9	1725.9	2731.7	5.6
																					Background	BLM	2	0.4	10517.6	738	9545	13302.4	5.6
																						PICH	3	0.1	4209.6	521.1	3419.7	5148.9	2.2
																						BLM	4	0.1	9521.5	745.8	8425.9	11106.9	2.2
																						PICH	5	0.2	4714.5	649.8	3164	6032.7	3.4
																						BLM	6	0.2	10800.1	1272.7	8725	13737.7	3.4
																						PICH	7	0.1	4988.8	499.2	4409.4	5935.2	1
																						BLM	8	0.1	12045.5	833.1	10901.4	13772	1
																						PICH	9	0.3	4352.9	478.2	3434.1	5195.1	5
																						BLM	10	0.3	11727.4	668.6	10322.8	13113.2	5
																						PICH	11	0.1	4224.5	298	3743.7	4625	1.7
																						BLM	12	0.1	10286.7	394.5	9634.1	11115.1	1.7
																						PICH	13	0.2	4782.7	384.7	3925	5521.8	2.5
																						BLM	14	0.2	10556.5	615.6	9685.8	11886.2	2.5
																						PICH	15	0.2	4436	604.5	3531.4	5419.6	2.3
																						BLM	16	0.2	10398.1	664.3	9372.1	11459.2	2.3
																						PICH	17	0.1	3988.2	230	3358	4373.4	1.9
																						BLM	18	0.1	9712.6	458.3	8883.4	10588.4	1.9
																						PICH	19	0.1	5606.2	754.8	4390.6	7085.1	2
																						BLM	20	0.1	10340.9	578.8	9176.2	11551.1	2
																						PICH	21	0.2	4664.9	511.6	3783.8	5619.6	2.4
																						BLM	22	0.2	10407.4	625.3	9026.2	11437.1	2.4
																						PICH	23	0.1	5483.4	387	4798.4	5972.2	0.9
																						BLM	24	0.1	10660.1	522.3	9768	11467.7	0.9
																						PICH	25	0.1	5278.7	674.2	4025	6068	1
																						BLM	26	0.1	11401.2	1376.8	9379	13647.3	1
																						PICH	27	0.1	4786	554.8	3491	5472.4	1
																						BLM	28	0.1	10750.8	659.5	9643.9	11764.1	1
																						PICH	29	0.1	4211.9	538	3091	4807.7	1.1
																						BLM	30	0.1	9812.9	842.1	8829.2	11088.7	1.1

## Sheet: Background correction Early ana
	Early Anaphase UFBs				Early Anaphase UFBs		(Sorted Z to A)				Early Anaphase UFBs
	RPE1-STB-ICRF_rBLMPICHCEN-02 z6-16		Mean		RPE1-STB-ICRF_rBLMPICHCEN-02 z6-16		Mean	Background correction	Background correction IF>0, 0		PICH	BLM
	Background	PICH	1593		Background	PICH	1593
	Background	BLM	8451.8		Background	BLM	8451.8
		PICH	2846.9			PICH	2846.9	1253.9	1253.9		1253.9	1203.4
		BLM	9655.2			PICH	3609.5	2016.5	2016.5		2016.5	3401.9
		PICH	3609.5			PICH	3560.2	1967.2	1967.2		1967.2	3108.2
		BLM	11853.7			PICH	3429.3	1836.3	1836.3		1836.3	3248.1
		PICH	3560.2			PICH	4164	2571	2571		2571	4685.5
		BLM	11560			PICH	4747.9	3154.9	3154.9		3154.9	3813.1
		PICH	3429.3			PICH	3786.4	2193.4	2193.4		2193.4	3227.6
		BLM	11699.9			PICH	5036.3	3443.3	3443.3		3443.3	4450.8
		PICH	4164			PICH	5214.8	3621.8	3621.8		3621.8	4315.1
		BLM	13137.3			PICH	4761.8	3168.8	3168.8		3168.8	3601.2
		PICH	4747.9			PICH	3919.8	2326.8	2326.8		2326.8	3525
		BLM	12264.9			PICH	3952.8	2359.8	2359.8		2359.8	3059.7
		PICH	3786.4			PICH	4025.2	2432.2	2432.2		2432.2	3293
		BLM	11679.4			BLM	9655.2	1203.4	1203.4
		PICH	5036.3			BLM	11853.7	3401.9	3401.9
		BLM	12902.6			BLM	11560	3108.2	3108.2
		PICH	5214.8			BLM	11699.9	3248.1	3248.1
		BLM	12766.9			BLM	13137.3	4685.5	4685.5
		PICH	4761.8			BLM	12264.9	3813.1	3813.1
		BLM	12053			BLM	11679.4	3227.6	3227.6
		PICH	3919.8			BLM	12902.6	4450.8	4450.8
		BLM	11976.8			BLM	12766.9	4315.1	4315.1
		PICH	3952.8			BLM	12053	3601.2	3601.2
		BLM	11511.5			BLM	11976.8	3525	3525
		PICH	4025.2			BLM	11511.5	3059.7	3059.7
		BLM	11744.8			BLM	11744.8	3293	3293
	RPE1-STB-ICRF_rBLMPICHCEN-05 z13-27				RPE1-STB-ICRF_rBLMPICHCEN-05 z13-27
	Background	PICH	2620.3		Background	PICH	2620.3
	Background	BLM	10482.8		Background	BLM	10482.8
		PICH	4567.3			PICH	4567.3	1947	1947		1947	4071
		BLM	14553.8			PICH	5061.7	2441.4	2441.4		2441.4	2456.5
		PICH	5061.7			PICH	5490.9	2870.6	2870.6		2870.6	1664.7
		BLM	12939.3			PICH	5775.5	3155.2	3155.2		3155.2	4715
		PICH	5490.9			PICH	5474.2	2853.9	2853.9		2853.9	1141
		BLM	12147.5			PICH	6070.3	3450	3450		3450	3539.4
		PICH	5775.5			PICH	6347.4	3727.1	3727.1		3727.1	2522.9
		BLM	15197.8			PICH	5308	2687.7	2687.7		2687.7	936.8
		PICH	5474.2			PICH	5596.9	2976.6	2976.6		2976.6	1496.9
		BLM	11623.8			BLM	14553.8	4071	4071
		PICH	6070.3			BLM	12939.3	2456.5	2456.5
		BLM	14022.2			BLM	12147.5	1664.7	1664.7
		PICH	6347.4			BLM	15197.8	4715	4715
		BLM	13005.7			BLM	11623.8	1141	1141
		PICH	5308			BLM	14022.2	3539.4	3539.4
		BLM	11419.6			BLM	13005.7	2522.9	2522.9
		PICH	5596.9			BLM	11419.6	936.8	936.8
		BLM	11979.7			BLM	11979.7	1496.9	1496.9
	RPE1-STB-ICRF_rBLMPICHCEN-08 z9-31				RPE1-STB-ICRF_rBLMPICHCEN-08 z9-31
	Background	PICH	3645.6		Background	PICH	3645.6
	Background	BLM	13793.3		Background	BLM	13793.3
		PICH	5584.5			PICH	5584.5	1938.9	1938.9		1938.9	3821.3
		BLM	17614.6			PICH	5855.8	2210.2	2210.2		2210.2	2588.3
		PICH	5855.8			PICH	8130.5	4484.9	4484.9		4484.9	5885.5
		BLM	16381.6			PICH	6935.8	3290.2	3290.2		3290.2	4678.2
		PICH	8130.5			PICH	6748.6	3103	3103		3103	5686.2
		BLM	19678.8			PICH	6595	2949.4	2949.4		2949.4	5997.6
		PICH	6935.8			PICH	5954.6	2309	2309		2309	4209.5
		BLM	18471.5			PICH	6488.8	2843.2	2843.2		2843.2	3811.3
		PICH	6748.6			PICH	7359.8	3714.2	3714.2		3714.2	4995.2
		BLM	19479.5			PICH	6759.5	3113.9	3113.9		3113.9	4724
		PICH	6595			PICH	6043.4	2397.8	2397.8		2397.8	3918.3
		BLM	19790.9			PICH	6146	2500.4	2500.4		2500.4	2212.7
		PICH	5954.6			PICH	6054	2408.4	2408.4		2408.4	2041.8
		BLM	18002.8			PICH	7528.5	3882.9	3882.9		3882.9	4466.2
		PICH	6488.8			PICH	6666	3020.4	3020.4		3020.4	3199.9
		BLM	17604.6			PICH	6043.9	2398.3	2398.3		2398.3	3022.2
		PICH	7359.8			BLM	17614.6	3821.3	3821.3
		BLM	18788.5			BLM	16381.6	2588.3	2588.3
		PICH	6759.5			BLM	19678.8	5885.5	5885.5
		BLM	18517.3			BLM	18471.5	4678.2	4678.2
		PICH	6043.4			BLM	19479.5	5686.2	5686.2
		BLM	17711.6			BLM	19790.9	5997.6	5997.6
		PICH	6146			BLM	18002.8	4209.5	4209.5
		BLM	16006			BLM	17604.6	3811.3	3811.3
		PICH	6054			BLM	18788.5	4995.2	4995.2
		BLM	15835.1			BLM	18517.3	4724	4724
		PICH	7528.5			BLM	17711.6	3918.3	3918.3
		BLM	18259.5			BLM	16006	2212.7	2212.7
		PICH	6666			BLM	15835.1	2041.8	2041.8
		BLM	16993.2			BLM	18259.5	4466.2	4466.2
		PICH	6043.9			BLM	16993.2	3199.9	3199.9
		BLM	16815.5			BLM	16815.5	3022.2	3022.2
	RPE1-STB-ICRF_rBLMPICHCEN-10 z9-27				RPE1-STB-ICRF_rBLMPICHCEN-10 z9-27
	Background	PICH	3469.4		Background	PICH	3469.4
	Background	BLM	14274		Background	BLM	14274
		PICH	6432.2			PICH	6432.2	2962.8	2962.8		2962.8	5807.5
		BLM	20081.5			PICH	7748.2	4278.8	4278.8		4278.8	7039.1
		PICH	7748.2			PICH	6307.6	2838.2	2838.2		2838.2	4394.7
		BLM	21313.1			PICH	7277	3807.6	3807.6		3807.6	5090.2
		PICH	6307.6			PICH	8376.5	4907.1	4907.1		4907.1	7510.5
		BLM	18668.7			PICH	7163.2	3693.8	3693.8		3693.8	8787.1
		PICH	7277			PICH	5854	2384.6	2384.6		2384.6	3965.3
		BLM	19364.2			PICH	6761.2	3291.8	3291.8		3291.8	6250.1
		PICH	8376.5			PICH	6175.3	2705.9	2705.9		2705.9	3630.7
		BLM	21784.5			PICH	7133.1	3663.7	3663.7		3663.7	4294.8
		PICH	7163.2			PICH	6585.1	3115.7	3115.7		3115.7	5245.3
		BLM	23061.1			PICH	6076.6	2607.2	2607.2		2607.2	5133.3
		PICH	5854			PICH	7064.8	3595.4	3595.4		3595.4	5485.5
		BLM	18239.3			PICH	9580.3	6110.9	6110.9		6110.9	9089.1
		PICH	6761.2			PICH	7987.5	4518.1	4518.1		4518.1	7243.1
		BLM	20524.1			PICH	6541.5	3072.1	3072.1		3072.1	4073
		PICH	6175.3			PICH	6720	3250.6	3250.6		3250.6	4842.7
		BLM	17904.7			BLM	20081.5	5807.5	5807.5
		PICH	7133.1			BLM	21313.1	7039.1	7039.1
		BLM	18568.8			BLM	18668.7	4394.7	4394.7
		PICH	6585.1			BLM	19364.2	5090.2	5090.2
		BLM	19519.3			BLM	21784.5	7510.5	7510.5
		PICH	6076.6			BLM	23061.1	8787.1	8787.1
		BLM	19407.3			BLM	18239.3	3965.3	3965.3
		PICH	7064.8			BLM	20524.1	6250.1	6250.1
		BLM	19759.5			BLM	17904.7	3630.7	3630.7
		PICH	9580.3			BLM	18568.8	4294.8	4294.8
		BLM	23363.1			BLM	19519.3	5245.3	5245.3
		PICH	7987.5			BLM	19407.3	5133.3	5133.3
		BLM	21517.1			BLM	19759.5	5485.5	5485.5
		PICH	6541.5			BLM	23363.1	9089.1	9089.1
		BLM	18347			BLM	21517.1	7243.1	7243.1
		PICH	6720			BLM	18347	4073	4073
		BLM	19116.7			BLM	19116.7	4842.7	4842.7
	RPE1-STB-ICRF_rBLMPICHCEN-13 z6-15				RPE1-STB-ICRF_rBLMPICHCEN-13 z6-15
	Background	PICH	1629.4		Background	PICH	1629.4
	Background	BLM	6972.9		Background	BLM	6972.9
		PICH	3880.7			PICH	3880.7	2251.3	2251.3		2251.3	2221.5
		BLM	9194.4			PICH	2815.4	1186	1186		1186	1270.1
		PICH	2815.4			PICH	5511	3881.6	3881.6		3881.6	4453.2
		BLM	8243			PICH	5138.3	3508.9	3508.9		3508.9	3140.5
		PICH	5511			PICH	6719.9	5090.5	5090.5		5090.5	5470
		BLM	11426.1			PICH	7248.1	5618.7	5618.7		5618.7	6093.8
		PICH	5138.3			PICH	5928	4298.6	4298.6		4298.6	5597.8
		BLM	10113.4			PICH	7551.1	5921.7	5921.7		5921.7	8251.3
		PICH	6719.9			PICH	4543	2913.6	2913.6		2913.6	4156.1
		BLM	12442.9			PICH	4662.1	3032.7	3032.7		3032.7	3140.8
		PICH	7248.1			PICH	5860.2	4230.8	4230.8		4230.8	5233.7
		BLM	13066.7			PICH	6765.5	5136.1	5136.1		5136.1	7083.2
		PICH	5928			PICH	5129.7	3500.3	3500.3		3500.3	5309.6
		BLM	12570.7			PICH	3774.5	2145.1	2145.1		2145.1	2129.6
		PICH	7551.1			PICH	4784.8	3155.4	3155.4		3155.4	4092.4
		BLM	15224.2			PICH	3850.2	2220.8	2220.8		2220.8	2450.4
		PICH	4543			BLM	9194.4	2221.5	2221.5
		BLM	11129			BLM	8243	1270.1	1270.1
		PICH	4662.1			BLM	11426.1	4453.2	4453.2
		BLM	10113.7			BLM	10113.4	3140.5	3140.5
		PICH	5860.2			BLM	12442.9	5470	5470
		BLM	12206.6			BLM	13066.7	6093.8	6093.8
		PICH	6765.5			BLM	12570.7	5597.8	5597.8
		BLM	14056.1			BLM	15224.2	8251.3	8251.3
		PICH	5129.7			BLM	11129	4156.1	4156.1
		BLM	12282.5			BLM	10113.7	3140.8	3140.8
		PICH	3774.5			BLM	12206.6	5233.7	5233.7
		BLM	9102.5			BLM	14056.1	7083.2	7083.2
		PICH	4784.8			BLM	12282.5	5309.6	5309.6
		BLM	11065.3			BLM	9102.5	2129.6	2129.6
		PICH	3850.2			BLM	11065.3	4092.4	4092.4
		BLM	9423.3			BLM	9423.3	2450.4	2450.4
	RPE1-STB-ICRF_rBLMPICHCEN-14 z6-26				RPE1-STB-ICRF_rBLMPICHCEN-14 z6-26
	Background	PICH	2794.7		Background	PICH	2794.7
	Background	BLM	10938.3		Background	BLM	10938.3
		PICH	5673.7			PICH	5673.7	2879	2879		2879	4116.9
		BLM	15055.2			PICH	5063.6	2268.9	2268.9		2268.9	3322.3
		PICH	5063.6			PICH	5285.6	2490.9	2490.9		2490.9	3729.4
		BLM	14260.6			PICH	8664.6	5869.9	5869.9		5869.9	5744.5
		PICH	5285.6			PICH	7765.9	4971.2	4971.2		4971.2	5808
		BLM	14667.7			PICH	7448	4653.3	4653.3		4653.3	6876.8
		PICH	8664.6			PICH	7023.7	4229	4229		4229	5337
		BLM	16682.8			PICH	7626.5	4831.8	4831.8		4831.8	6993.3
		PICH	7765.9			PICH	4855.2	2060.5	2060.5		2060.5	2173.7
		BLM	16746.3			PICH	6533.5	3738.8	3738.8		3738.8	5796.3
		PICH	7448			PICH	6091.8	3297.1	3297.1		3297.1	5041.7
		BLM	17815.1			PICH	5122.4	2327.7	2327.7		2327.7	4113.2
		PICH	7023.7			PICH	6257.9	3463.2	3463.2		3463.2	4370.4
		BLM	16275.3			PICH	7174.5	4379.8	4379.8		4379.8	4682.8
		PICH	7626.5			PICH	7660.4	4865.7	4865.7		4865.7	8428
		BLM	17931.6			PICH	6602.8	3808.1	3808.1		3808.1	5986.4
		PICH	4855.2			PICH	6431.3	3636.6	3636.6		3636.6	5669.7
		BLM	13112			PICH	6103.4	3308.7	3308.7		3308.7	4864.9
		PICH	6533.5			BLM	15055.2	4116.9	4116.9
		BLM	16734.6			BLM	14260.6	3322.3	3322.3
		PICH	6091.8			BLM	14667.7	3729.4	3729.4
		BLM	15980			BLM	16682.8	5744.5	5744.5
		PICH	5122.4			BLM	16746.3	5808	5808
		BLM	15051.5			BLM	17815.1	6876.8	6876.8
		PICH	6257.9			BLM	16275.3	5337	5337
		BLM	15308.7			BLM	17931.6	6993.3	6993.3
		PICH	7174.5			BLM	13112	2173.7	2173.7
		BLM	15621.1			BLM	16734.6	5796.3	5796.3
		PICH	7660.4			BLM	15980	5041.7	5041.7
		BLM	19366.3			BLM	15051.5	4113.2	4113.2
		PICH	6602.8			BLM	15308.7	4370.4	4370.4
		BLM	16924.7			BLM	15621.1	4682.8	4682.8
		PICH	6431.3			BLM	19366.3	8428	8428
		BLM	16608			BLM	16924.7	5986.4	5986.4
		PICH	6103.4			BLM	16608	5669.7	5669.7
		BLM	15803.2			BLM	15803.2	4864.9	4864.9
	RPE1-STB-ICRF_rBLMPICHCEN-16 z8-22				RPE1-STB-ICRF_rBLMPICHCEN-16 z8-22
	Background	PICH	2117.6		Background	PICH	2117.6
	Background	BLM	9512.6		Background	BLM	9512.6
		PICH	5454.9			PICH	5454.9	3337.3	3337.3		3337.3	4898.4
		BLM	14411			PICH	4725.4	2607.8	2607.8		2607.8	5438.3
		PICH	4725.4			PICH	4352.4	2234.8	2234.8		2234.8	3907.8
		BLM	14950.9			PICH	5737.1	3619.5	3619.5		3619.5	4615.5
		PICH	4352.4			PICH	6586.8	4469.2	4469.2		4469.2	6910.6
		BLM	13420.4			PICH	6487	4369.4	4369.4		4369.4	8863.9
		PICH	5737.1			PICH	5616	3498.4	3498.4		3498.4	6341.6
		BLM	14128.1			PICH	5959.1	3841.5	3841.5		3841.5	6865
		PICH	6586.8			PICH	7545.5	5427.9	5427.9		5427.9	9347.6
		BLM	16423.2			PICH	5431.9	3314.3	3314.3		3314.3	7135
		PICH	6487			PICH	5651	3533.4	3533.4		3533.4	7184
		BLM	18376.5			PICH	4350.6	2233	2233		2233	4094.1
		PICH	5616			PICH	5170.8	3053.2	3053.2		3053.2	5362.6
		BLM	15854.2			PICH	5560.9	3443.3	3443.3		3443.3	5744.8
		PICH	5959.1			PICH	4141.1	2023.5	2023.5		2023.5	2752.8
		BLM	16377.6			BLM	14411	4898.4	4898.4
		PICH	7545.5			BLM	14950.9	5438.3	5438.3
		BLM	18860.2			BLM	13420.4	3907.8	3907.8
		PICH	5431.9			BLM	14128.1	4615.5	4615.5
		BLM	16647.6			BLM	16423.2	6910.6	6910.6
		PICH	5651			BLM	18376.5	8863.9	8863.9
		BLM	16696.6			BLM	15854.2	6341.6	6341.6
		PICH	4350.6			BLM	16377.6	6865	6865
		BLM	13606.7			BLM	18860.2	9347.6	9347.6
		PICH	5170.8			BLM	16647.6	7135	7135
		BLM	14875.2			BLM	16696.6	7184	7184
		PICH	5560.9			BLM	13606.7	4094.1	4094.1
		BLM	15257.4			BLM	14875.2	5362.6	5362.6
		PICH	4141.1			BLM	15257.4	5744.8	5744.8
		BLM	12265.4			BLM	12265.4	2752.8	2752.8
	RPE1-STB-ICRF_rBLMPICHCEN-18 z10-28				RPE1-STB-ICRF_rBLMPICHCEN-18 z10-28
	Background	PICH	2333.8		Background	PICH	2333.8
	Background	BLM	10658.9		Background	BLM	10658.9
		PICH	4408.8			PICH	4408.8	2075	2075		2075	1708.3
		BLM	12367.2			PICH	5374.8	3041	3041		3041	3908.9
		PICH	5374.8			PICH	5952.5	3618.7	3618.7		3618.7	4210.7
		BLM	14567.8			PICH	5001.5	2667.7	2667.7		2667.7	4813.8
		PICH	5952.5			PICH	4875.2	2541.4	2541.4		2541.4	2212.6
		BLM	14869.6			PICH	5353.4	3019.6	3019.6		3019.6	2713.9
		PICH	5001.5			PICH	7504.3	5170.5	5170.5		5170.5	8413.7
		BLM	15472.7			BLM	12367.2	1708.3	1708.3
		PICH	4875.2			BLM	14567.8	3908.9	3908.9
		BLM	12871.5			BLM	14869.6	4210.7	4210.7
		PICH	5353.4			BLM	15472.7	4813.8	4813.8
		BLM	13372.8			BLM	12871.5	2212.6	2212.6
		PICH	7504.3			BLM	13372.8	2713.9	2713.9
		BLM	19072.6			BLM	19072.6	8413.7	8413.7
	RPE1-STB-ICRF_rBLMPICHCEN-21 z9-25				RPE1-STB-ICRF_rBLMPICHCEN-21 z9-25
	Background	PICH	2662.8		Background	PICH	2662.8
	Background	BLM	11591.4		Background	BLM	11591.4
		PICH	5186.7			PICH	5186.7	2523.9	2523.9		2523.9	3678.7
		BLM	15270.1			PICH	5226.4	2563.6	2563.6		2563.6	2974
		PICH	5226.4			PICH	5952.5	3289.7	3289.7		3289.7	3710.5
		BLM	14565.4			PICH	5943.2	3280.4	3280.4		3280.4	5121.9
		PICH	5952.5			PICH	8098.8	5436	5436		5436	7765.7
		BLM	15301.9			PICH	5427.3	2764.5	2764.5		2764.5	3124.6
		PICH	5943.2			PICH	5698.1	3035.3	3035.3		3035.3	4851.8
		BLM	16713.3			PICH	6471.5	3808.7	3808.7		3808.7	5048.2
		PICH	8098.8			PICH	6330.5	3667.7	3667.7		3667.7	3217
		BLM	19357.1			PICH	5677.5	3014.7	3014.7		3014.7	2851.2
		PICH	5427.3			PICH	6239.1	3576.3	3576.3		3576.3	2440.4
		BLM	14716			PICH	4811.5	2148.7	2148.7		2148.7	1923.6
		PICH	5698.1			PICH	4260.2	1597.4	1597.4		1597.4	0
		BLM	16443.2			PICH	3984.6	1321.8	1321.8		1321.8	0
		PICH	6471.5			PICH	3818.7	1155.9	1155.9		1155.9	0
		BLM	16639.6			PICH	4113.6	1450.8	1450.8		1450.8	0
		PICH	6330.5			BLM	15270.1	3678.7	3678.7
		BLM	14808.4			BLM	14565.4	2974	2974
		PICH	5677.5			BLM	15301.9	3710.5	3710.5
		BLM	14442.6			BLM	16713.3	5121.9	5121.9
		PICH	6239.1			BLM	19357.1	7765.7	7765.7
		BLM	14031.8			BLM	14716	3124.6	3124.6
		PICH	4811.5			BLM	16443.2	4851.8	4851.8
		BLM	13515			BLM	16639.6	5048.2	5048.2
		PICH	4260.2			BLM	14808.4	3217	3217
		BLM	11182.5			BLM	14442.6	2851.2	2851.2
		PICH	3984.6			BLM	14031.8	2440.4	2440.4
		BLM	11561.1			BLM	13515	1923.6	1923.6
		PICH	3818.7			BLM	11182.5	-408.9	0
		BLM	11279.2			BLM	11561.1	-30.3	0
		PICH	4113.6			BLM	11279.2	-312.2	0
		BLM	11292.2			BLM	11292.2	-299.2	0
	RPE1-STB-ICRF_rBLMPICHCEN-24 z10-28				RPE1-STB-ICRF_rBLMPICHCEN-24 z10-28
	Background	PICH	2669.5		Background	PICH	2669.5
	Background	BLM	11137.4		Background	BLM	11137.4
		PICH	4603.6			PICH	4603.6	1934.1	1934.1		1934.1	1635
		BLM	12772.4			PICH	5501.7	2832.2	2832.2		2832.2	2615.2
		PICH	5501.7			PICH	5966.3	3296.8	3296.8		3296.8	3269.5
		BLM	13752.6			PICH	5420.3	2750.8	2750.8		2750.8	2498.4
		PICH	5966.3			PICH	5892.6	3223.1	3223.1		3223.1	3463.9
		BLM	14406.9			PICH	5595.4	2925.9	2925.9		2925.9	2239.7
		PICH	5420.3			PICH	5548.5	2879	2879		2879	2215.4
		BLM	13635.8			PICH	6512.8	3843.3	3843.3		3843.3	2960.7
		PICH	5892.6			PICH	6382	3712.5	3712.5		3712.5	2327
		BLM	14601.3			PICH	6328.7	3659.2	3659.2		3659.2	2410.7
		PICH	5595.4			PICH	6177.8	3508.3	3508.3		3508.3	2824.1
		BLM	13377.1			PICH	6135.9	3466.4	3466.4		3466.4	2501.8
		PICH	5548.5			PICH	8308.4	5638.9	5638.9		5638.9	5099.3
		BLM	13352.8			PICH	5865.2	3195.7	3195.7		3195.7	3627.5
		PICH	6512.8			PICH	5838.2	3168.7	3168.7		3168.7	4059.4
		BLM	14098.1			PICH	8314.4	5644.9	5644.9		5644.9	3642.4
		PICH	6382			PICH	7010.3	4340.8	4340.8		4340.8	3278.5
		BLM	13464.4			PICH	5499.4	2829.9	2829.9		2829.9	843
		PICH	6328.7			PICH	6350.7	3681.2	3681.2		3681.2	2460.5
		BLM	13548.1			PICH	4572.3	1902.8	1902.8		1902.8	137
		PICH	6177.8			BLM	12772.4	1635	1635
		BLM	13961.5			BLM	13752.6	2615.2	2615.2
		PICH	6135.9			BLM	14406.9	3269.5	3269.5
		BLM	13639.2			BLM	13635.8	2498.4	2498.4
		PICH	8308.4			BLM	14601.3	3463.9	3463.9
		BLM	16236.7			BLM	13377.1	2239.7	2239.7
		PICH	5865.2			BLM	13352.8	2215.4	2215.4
		BLM	14764.9			BLM	14098.1	2960.7	2960.7
		PICH	5838.2			BLM	13464.4	2327	2327
		BLM	15196.8			BLM	13548.1	2410.7	2410.7
		PICH	8314.4			BLM	13961.5	2824.1	2824.1
		BLM	14779.8			BLM	13639.2	2501.8	2501.8
		PICH	7010.3			BLM	16236.7	5099.3	5099.3
		BLM	14415.9			BLM	14764.9	3627.5	3627.5
		PICH	5499.4			BLM	15196.8	4059.4	4059.4
		BLM	11980.4			BLM	14779.8	3642.4	3642.4
		PICH	6350.7			BLM	14415.9	3278.5	3278.5
		BLM	13597.9			BLM	11980.4	843	843
		PICH	4572.3			BLM	13597.9	2460.5	2460.5
		BLM	11274.4			BLM	11274.4	137	137
	RPE1-STB-ICRF_rBLMPICHCEN-26 (top) z13-36				RPE1-STB-ICRF_rBLMPICHCEN-26 (top) z13-36
	Background	PICH	4117		Background	PICH	4117
	Background	BLM	13760.4		Background	BLM	13760.4
		PICH	4613.2			PICH	4613.2	496.2	496.2		496.2	2121.3
		BLM	15881.7			PICH	4891.3	774.3	774.3		774.3	1450.8
		PICH	4891.3			PICH	5687.5	1570.5	1570.5		1570.5	2023.2
		BLM	15211.2			PICH	6586.8	2469.8	2469.8		2469.8	4246.3
		PICH	5687.5			PICH	7552.5	3435.5	3435.5		3435.5	5304.8
		BLM	15783.6			PICH	8344.5	4227.5	4227.5		4227.5	8019.1
		PICH	6586.8			PICH	7738.8	3621.8	3621.8		3621.8	6120.8
		BLM	18006.7			PICH	8001.6	3884.6	3884.6		3884.6	6892.3
		PICH	7552.5			PICH	8767.4	4650.4	4650.4		4650.4	5891.4
		BLM	19065.2			PICH	10254.8	6137.8	6137.8		6137.8	9104.1
		PICH	8344.5			PICH	7788.8	3671.8	3671.8		3671.8	4164.4
		BLM	21779.5			PICH	6216.3	2099.3	2099.3		2099.3	2400.7
		PICH	7738.8			PICH	5469.9	1352.9	1352.9		1352.9	3570.3
		BLM	19881.2			PICH	6212.3	2095.3	2095.3		2095.3	4035.4
		PICH	8001.6			PICH	6572	2455	2455		2455	4616.3
		BLM	20652.7			PICH	7623.2	3506.2	3506.2		3506.2	5933.3
		PICH	8767.4			PICH	7526	3409	3409		3409	5910.4
		BLM	19651.8			PICH	7130.2	3013.2	3013.2		3013.2	4917.8
		PICH	10254.8			PICH	7936.1	3819.1	3819.1		3819.1	6254.9
		BLM	22864.5			PICH	6897.9	2780.9	2780.9		2780.9	5325.7
		PICH	7788.8			PICH	5892.9	1775.9	1775.9		1775.9	3129.8
		BLM	17924.8			PICH	5624.1	1507.1	1507.1		1507.1	2201.1
		PICH	6216.3			PICH	5127	1010	1010		1010	2736
		BLM	16161.1			BLM	15881.7	2121.3	2121.3
		PICH	5469.9			BLM	15211.2	1450.8	1450.8
		BLM	17330.7			BLM	15783.6	2023.2	2023.2
		PICH	6212.3			BLM	18006.7	4246.3	4246.3
		BLM	17795.8			BLM	19065.2	5304.8	5304.8
		PICH	6572			BLM	21779.5	8019.1	8019.1
		BLM	18376.7			BLM	19881.2	6120.8	6120.8
		PICH	7623.2			BLM	20652.7	6892.3	6892.3
		BLM	19693.7			BLM	19651.8	5891.4	5891.4
		PICH	7526			BLM	22864.5	9104.1	9104.1
		BLM	19670.8			BLM	17924.8	4164.4	4164.4
		PICH	7130.2			BLM	16161.1	2400.7	2400.7
		BLM	18678.2			BLM	17330.7	3570.3	3570.3
		PICH	7936.1			BLM	17795.8	4035.4	4035.4
		BLM	20015.3			BLM	18376.7	4616.3	4616.3
		PICH	6897.9			BLM	19693.7	5933.3	5933.3
		BLM	19086.1			BLM	19670.8	5910.4	5910.4
		PICH	5892.9			BLM	18678.2	4917.8	4917.8
		BLM	16890.2			BLM	20015.3	6254.9	6254.9
		PICH	5624.1			BLM	19086.1	5325.7	5325.7
		BLM	15961.5			BLM	16890.2	3129.8	3129.8
		PICH	5127			BLM	15961.5	2201.1	2201.1
		BLM	16496.4			BLM	16496.4	2736	2736
	RPE1-STB-ICRF_rBLMPICHCEN-29 z9-22				RPE1-STB-ICRF_rBLMPICHCEN-29 z9-22
	Background	PICH	2446.7		Background	PICH	2446.7
	Background	BLM	8343.6		Background	BLM	8343.6
		PICH	3140.5			PICH	3140.5	693.8	693.8		693.8	0
		BLM	7790.5			PICH	3419.7	973	973		973	0
		PICH	3419.7			PICH	3797.3	1350.6	1350.6		1350.6	0
		BLM	7218.9			PICH	5581.6	3134.9	3134.9		3134.9	1973.1
		PICH	3797.3			PICH	4228.1	1781.4	1781.4		1781.4	733.7
		BLM	7727.8			PICH	4131.9	1685.2	1685.2		1685.2	1601.6
		PICH	5581.6			PICH	5387.6	2940.9	2940.9		2940.9	1113.2
		BLM	10316.7			PICH	4662.3	2215.6	2215.6		2215.6	1006.8
		PICH	4228.1			PICH	3730.7	1284	1284		1284	233.1
		BLM	9077.3			PICH	4974.4	2527.7	2527.7		2527.7	1033.8
		PICH	4131.9			PICH	4527.9	2081.2	2081.2		2081.2	842.8
		BLM	9945.2			BLM	7790.5	-553.1	0
		PICH	5387.6			BLM	7218.9	-1124.7	0
		BLM	9456.8			BLM	7727.8	-615.8	0
		PICH	4662.3			BLM	10316.7	1973.1	1973.1
		BLM	9350.4			BLM	9077.3	733.7	733.7
		PICH	3730.7			BLM	9945.2	1601.6	1601.6
		BLM	8576.7			BLM	9456.8	1113.2	1113.2
		PICH	4974.4			BLM	9350.4	1006.8	1006.8
		BLM	9377.4			BLM	8576.7	233.1	233.1
		PICH	4527.9			BLM	9377.4	1033.8	1033.8
		BLM	9186.4			BLM	9186.4	842.8	842.8

## Sheet: Background correction Late Ana
	Mid/Late Anaphase UFBs				Mid/Late Anaphase UFBs		(Sorted Z to A)			Mid/Late Anaphase UFBs
	RPE1-STB-ICRF_rBLMPICHCEN-01 z8-13		Mean		RPE1-STB-ICRF_rBLMPICHCEN-01 z8-13		Mean	Background correction		PICH	BLM
	Background	PICH	3278.7		Background	PICH	3278.7
	Background	BLM	13444.9		Background	BLM	13444.9
		PICH	9780.9			PICH	9780.9	6502.2		6502.2	10167.5
		BLM	23612.4			PICH	8519.9	5241.2		5241.2	6802.4
		PICH	8519.9			PICH	7923.8	4645.1		4645.1	10030.1
		BLM	20247.3			PICH	7429.7	4151		4151	10441.2
		PICH	7923.8			PICH	9242.6	5963.9		5963.9	12553.8
		BLM	23475			PICH	8443.5	5164.8		5164.8	9358.9
		PICH	7429.7			PICH	6314.9	3036.2		3036.2	8869
		BLM	23886.1			BLM	23612.4	10167.5
		PICH	9242.6			BLM	20247.3	6802.4
		BLM	25998.7			BLM	23475	10030.1
		PICH	8443.5			BLM	23886.1	10441.2
		BLM	22803.8			BLM	25998.7	12553.8
		PICH	6314.9			BLM	22803.8	9358.9
		BLM	22313.9			BLM	22313.9	8869
	RPE1-STB-ICRF_rBLMPICHCEN-03 z10-15				RPE1-STB-ICRF_rBLMPICHCEN-03 z10-15
	Background	PICH	2264.7		Background	PICH	2264.7
	Background	BLM	10524.6		Background	BLM	10524.6
		PICH	4532.7			PICH	4532.7	2268		2268	2870.8
		BLM	13395.4			PICH	6482.4	4217.7		4217.7	7876.2
		PICH	6482.4			PICH	4962.2	2697.5		2697.5	4916.2
		BLM	18400.8			PICH	5106.8	2842.1		2842.1	4003.9
		PICH	4962.2			PICH	5534.7	3270		3270	6027.3
		BLM	15440.8			PICH	5199.1	2934.4		2934.4	5712.4
		PICH	5106.8			PICH	4775.3	2510.6		2510.6	5525.3
		BLM	14528.5			BLM	13395.4	2870.8
		PICH	5534.7			BLM	18400.8	7876.2
		BLM	16551.9			BLM	15440.8	4916.2
		PICH	5199.1			BLM	14528.5	4003.9
		BLM	16237			BLM	16551.9	6027.3
		PICH	4775.3			BLM	16237	5712.4
		BLM	16049.9			BLM	16049.9	5525.3
	RPE1-STB-ICRF_rBLMPICHCEN-04 z8-16				RPE1-STB-ICRF_rBLMPICHCEN-04 z8-16
	Background	PICH	2389.3		Background	PICH	2389.3
	Background	BLM	11720.4		Background	BLM	11720.4
		PICH	8598.6			PICH	8598.6	6209.3		6209.3	13115.5
		BLM	24835.9			PICH	5216	2826.7		2826.7	6425.9
		PICH	5216			PICH	6459.7	4070.4		4070.4	9331.7
		BLM	18146.3			PICH	5284.9	2895.6		2895.6	5831.2
		PICH	6459.7			BLM	24835.9	13115.5
		BLM	21052.1			BLM	18146.3	6425.9
		PICH	5284.9			BLM	21052.1	9331.7
		BLM	17551.6			BLM	17551.6	5831.2
	RPE1-STB-ICRF_rBLMPICHCEN-06 z10-12				RPE1-STB-ICRF_rBLMPICHCEN-06 z10-12
	Background	PICH	2723.2		Background	PICH	2723.2
	Background	BLM	13304.7		Background	BLM	13304.7
		PICH	6403.7			PICH	6403.7	3680.5		3680.5	5196.7
		BLM	18501.4			PICH	5853.5	3130.3		3130.3	11606.4
		PICH	5853.5			BLM	18501.4	5196.7
		BLM	24911.1			BLM	24911.1	11606.4
	RPE1-STB-ICRF_rBLMPICHCEN-07 z8-18				RPE1-STB-ICRF_rBLMPICHCEN-07 z8-18
	Background	PICH	3350.3		Background	PICH	3350.3
	Background	BLM	13954.4		Background	BLM	13954.4
		PICH	6637.2			PICH	6637.2	3286.9		3286.9	7317.6
		BLM	21272			PICH	6268.3	2918		2918	4612.2
		PICH	6268.3			PICH	6902.4	3552.1		3552.1	6830.8
		BLM	18566.6			BLM	21272	7317.6
		PICH	6902.4			BLM	18566.6	4612.2
		BLM	20785.2			BLM	20785.2	6830.8
	RPE1-STB-ICRF_rBLMPICHCEN-09 z14-17				RPE1-STB-ICRF_rBLMPICHCEN-09 z14-17
	Background	PICH	2459.3		Background	PICH	2459.3
	Background	BLM	12177.8		Background	BLM	12177.8
		PICH	5261			PICH	5261	2801.7		2801.7	2946.3
		BLM	15124.1			BLM	15124.1	2946.3
	RPE1-STB-ICRF_rBLMPICHCEN-11 z8-19				RPE1-STB-ICRF_rBLMPICHCEN-11 z8-19
	Background	PICH	2920.4		Background	PICH	2920.4
	Background	BLM	12770		Background	BLM	12770
		PICH	5596.1			PICH	5596.1	2675.7		2675.7	3334
		BLM	16104			PICH	6701	3780.6		3780.6	4347.1
		PICH	6701			PICH	6602.2	3681.8		3681.8	6262.4
		BLM	17117.1			PICH	5469.1	2548.7		2548.7	2548.5
		PICH	6602.2			PICH	4657.9	1737.5		1737.5	2312.5
		BLM	19032.4			BLM	16104	3334
		PICH	5469.1			BLM	17117.1	4347.1
		BLM	15318.5			BLM	19032.4	6262.4
		PICH	4657.9			BLM	15318.5	2548.5
		BLM	15082.5			BLM	15082.5	2312.5
	RPE1-STB-ICRF_rBLMPICHCEN-12 z12-22				RPE1-STB-ICRF_rBLMPICHCEN-12 z12-22
	Background	PICH	2277		Background	PICH	2277
	Background	BLM	11027.5		Background	BLM	11027.5
		PICH	5621.2			PICH	5621.2	3344.2		3344.2	7122.2
		BLM	18149.7			PICH	6607.7	4330.7		4330.7	8329.6
		PICH	6607.7			PICH	5139.4	2862.4		2862.4	5213.6
		BLM	19357.1			PICH	5740.5	3463.5		3463.5	7193.8
		PICH	5139.4			PICH	4960.4	2683.4		2683.4	3601.2
		BLM	16241.1			PICH	4597.3	2320.3		2320.3	6155.8
		PICH	5740.5			BLM	18149.7	7122.2
		BLM	18221.3			BLM	19357.1	8329.6
		PICH	4960.4			BLM	16241.1	5213.6
		BLM	14628.7			BLM	18221.3	7193.8
		PICH	4597.3			BLM	14628.7	3601.2
		BLM	17183.3			BLM	17183.3	6155.8
	RPE1-STB-ICRF_rBLMPICHCEN-15 z8-15				RPE1-STB-ICRF_rBLMPICHCEN-15 z8-15
	Background	PICH	2342.5		Background	PICH	2342.5
	Background	BLM	9912.5		Background	BLM	9912.5
		PICH	5463.8			PICH	5463.8	3121.3		3121.3	2521.3
		BLM	12433.8			PICH	6318.9	3976.4		3976.4	7039
		PICH	6318.9			PICH	6575.7	4233.2		4233.2	4977.6
		BLM	16951.5			PICH	5085	2742.5		2742.5	4129.9
		PICH	6575.7			PICH	5481.1	3138.6		3138.6	3703.5
		BLM	14890.1			BLM	12433.8	2521.3
		PICH	5085			BLM	16951.5	7039
		BLM	14042.4			BLM	14890.1	4977.6
		PICH	5481.1			BLM	14042.4	4129.9
		BLM	13616			BLM	13616	3703.5
	RPE1-STB-ICRF_rBLMPICHCEN-17 z12-17				RPE1-STB-ICRF_rBLMPICHCEN-17 z12-17
	Background	PICH	2470.3		Background	PICH	2470.3
	Background	BLM	11631.9		Background	BLM	11631.9
		PICH	4400.8			PICH	4400.8	1930.5		1930.5	4989.7
		BLM	16621.6			PICH	4612.5	2142.2		2142.2	4296.2
		PICH	4612.5			BLM	16621.6	4989.7
		BLM	15928.1			BLM	15928.1	4296.2
	RPE1-STB-ICRF_rBLMPICHCEN-19 z8-16				RPE1-STB-ICRF_rBLMPICHCEN-19 z8-16
	Background	PICH	2046.3		Background	PICH	2046.3
	Background	BLM	11659		Background	BLM	11659
		PICH	5021.8			PICH	5021.8	2975.5		2975.5	8747.7
		BLM	20406.7			PICH	4062.9	2016.6		2016.6	7119.2
		PICH	4062.9			PICH	4051.5	2005.2		2005.2	3760.7
		BLM	18778.2			PICH	5425.4	3379.1		3379.1	3888.8
		PICH	4051.5			PICH	5212.1	3165.8		3165.8	5976.4
		BLM	15419.7			PICH	5069.3	3023		3023	6390.6
		PICH	5425.4			PICH	4111.3	2065		2065	3614.9
		BLM	15547.8			PICH	3967.6	1921.3		1921.3	3900.4
		PICH	5212.1			PICH	4651.7	2605.4		2605.4	5283.2
		BLM	17635.4			PICH	4385.7	2339.4		2339.4	4763.7
		PICH	5069.3			PICH	3426.7	1380.4		1380.4	3444
		BLM	18049.6			BLM	20406.7	8747.7
		PICH	4111.3			BLM	18778.2	7119.2
		BLM	15273.9			BLM	15419.7	3760.7
		PICH	3967.6			BLM	15547.8	3888.8
		BLM	15559.4			BLM	17635.4	5976.4
		PICH	4651.7			BLM	18049.6	6390.6
		BLM	16942.2			BLM	15273.9	3614.9
		PICH	4385.7			BLM	15559.4	3900.4
		BLM	16422.7			BLM	16942.2	5283.2
		PICH	3426.7			BLM	16422.7	4763.7
		BLM	15103			BLM	15103	3444
	RPE1-STB-ICRF_rBLMPICHCEN-22 z8-14				RPE1-STB-ICRF_rBLMPICHCEN-22 z8-14
	Background	PICH	2083.9		Background	PICH	2083.9
	Background	BLM	10979		Background	BLM	10979
		PICH	3963.2			PICH	3963.2	1879.3		1879.3	3245
		BLM	14224			PICH	6415.6	4331.7		4331.7	7335.9
		PICH	6415.6			PICH	4832.2	2748.3		2748.3	6338.3
		BLM	18314.9			BLM	14224	3245
		PICH	4832.2			BLM	18314.9	7335.9
		BLM	17317.3			BLM	17317.3	6338.3
	RPE1-STB-ICRF_rBLMPICHCEN-23 z9-28				RPE1-STB-ICRF_rBLMPICHCEN-23 z9-28
	Background	PICH	2513.7		Background	PICH	2513.7
	Background	BLM	12244.3		Background	BLM	12244.3
		PICH	4796.7			PICH	4796.7	2283		2283	4911.8
		BLM	17156.1			PICH	4604.1	2090.4		2090.4	3194.6
		PICH	4604.1			PICH	4705	2191.3		2191.3	3837.5
		BLM	15438.9			PICH	4487.7	1974		1974	2329.8
		PICH	4705			BLM	17156.1	4911.8
		BLM	16081.8			BLM	15438.9	3194.6
		PICH	4487.7			BLM	16081.8	3837.5
		BLM	14574.1			BLM	14574.1	2329.8
	RPE1-STB-ICRF_rBLMPICHCEN-26(bottom) z5-13				RPE1-STB-ICRF_rBLMPICHCEN-26(bottom) z5-13
	Background	PICH	1781.1		Background	PICH	1781.1
	Background	BLM	8728.5		Background	BLM	8728.5
		PICH	4084.8			PICH	4084.8	2303.7		2303.7	4155.2
		BLM	12883.7			PICH	4286.9	2505.8		2505.8	4575.6
		PICH	4286.9			PICH	3457.9	1676.8		1676.8	2202.8
		BLM	13304.1			PICH	5281.9	3500.8		3500.8	7681.7
		PICH	3457.9			PICH	5463.3	3682.2		3682.2	6916.1
		BLM	10931.3			PICH	5622.6	3841.5		3841.5	6287.6
		PICH	5281.9			PICH	6204.9	4423.8		4423.8	10501
		BLM	16410.2			PICH	5503.6	3722.5		3722.5	7309.4
		PICH	5463.3			PICH	4479.6	2698.5		2698.5	4530.6
		BLM	15644.6			PICH	4236.7	2455.6		2455.6	3817.4
		PICH	5622.6			BLM	12883.7	4155.2
		BLM	15016.1			BLM	13304.1	4575.6
		PICH	6204.9			BLM	10931.3	2202.8
		BLM	19229.5			BLM	16410.2	7681.7
		PICH	5503.6			BLM	15644.6	6916.1
		BLM	16037.9			BLM	15016.1	6287.6
		PICH	4479.6			BLM	19229.5	10501
		BLM	13259.1			BLM	16037.9	7309.4
		PICH	4236.7			BLM	13259.1	4530.6
		BLM	12545.9			BLM	12545.9	3817.4

## Sheet: Background correction siSGO1
	siSGO1 Pre-UFBs				siSGO1 Pre-UFBs		(Sorted Z to A)				siSGO1 Pre-UFBs
	RPE1siSgo1-STB-ICRF_rBLMPICHCEN-01 (top) z9-18		Mean		RPE1siSgo1-STB-ICRF_rBLMPICHCEN-01 (top) z9-18		Mean	Background correction	Background correction IF>0, 0		PICH	BLM
	Background	PICH	3002.5		Background	PICH	3002.5
	Background	BLM	12957.5		Background	BLM	12957.5
		PICH	4800.9			PICH	4800.9	1798.4	1798.4		1798.4	0
		BLM	12631.8			PICH	6626.4	3623.9	3623.9		3623.9	2204.2
		PICH	6626.4			PICH	6143	3140.5	3140.5		3140.5	1252.8
		BLM	15161.7			PICH	7359.4	4356.9	4356.9		4356.9	3852.9
		PICH	6143			PICH	6216.6	3214.1	3214.1		3214.1	2154.7
		BLM	14210.3			PICH	6214.4	3211.9	3211.9		3211.9	2385.8
		PICH	7359.4			PICH	5233.6	2231.1	2231.1		2231.1	978.5
		BLM	16810.4			PICH	6236.7	3234.2	3234.2		3234.2	1402.5
		PICH	6216.6			PICH	7341.5	4339	4339		4339	2786
		BLM	15112.2			PICH	5808.7	2806.2	2806.2		2806.2	0
		PICH	6214.4			BLM	12631.8	-325.7	0
		BLM	15343.3			BLM	15161.7	2204.2	2204.2
		PICH	5233.6			BLM	14210.3	1252.8	1252.8
		BLM	13936			BLM	16810.4	3852.9	3852.9
		PICH	6236.7			BLM	15112.2	2154.7	2154.7
		BLM	14360			BLM	15343.3	2385.8	2385.8
		PICH	7341.5			BLM	13936	978.5	978.5
		BLM	15743.5			BLM	14360	1402.5	1402.5
		PICH	5808.7			BLM	15743.5	2786	2786
		BLM	12645.6			BLM	12645.6	-311.9	0
	RPE1siSgo1-STB-ICRF_rBLMPICHCEN-01 (bottom) z16-31				RPE1siSgo1-STB-ICRF_rBLMPICHCEN-01 (bottom) z16-31
	Background	PICH	3332.9		Background	PICH	3332.9
	Background	BLM	15300.3		Background	BLM	15300.3
		PICH	6193.3			PICH	6193.3	2860.4	2860.4		2860.4	2070.7
		BLM	17371			PICH	6466.8	3133.9	3133.9		3133.9	4444.1
		PICH	6466.8			PICH	6673.5	3340.6	3340.6		3340.6	4495.4
		BLM	19744.4			PICH	6073.5	2740.6	2740.6		2740.6	3889
		PICH	6673.5			PICH	6260.8	2927.9	2927.9		2927.9	3150
		BLM	19795.7			PICH	5805.4	2472.5	2472.5		2472.5	1503.2
		PICH	6073.5			PICH	5653.2	2320.3	2320.3		2320.3	1818.7
		BLM	19189.3			PICH	5128.9	1796	1796		1796	1909.1
		PICH	6260.8			PICH	5777.6	2444.7	2444.7		2444.7	1763.3
		BLM	18450.3			BLM	17371	2070.7	2070.7
		PICH	5805.4			BLM	19744.4	4444.1	4444.1
		BLM	16803.5			BLM	19795.7	4495.4	4495.4
		PICH	5653.2			BLM	19189.3	3889	3889
		BLM	17119			BLM	18450.3	3150	3150
		PICH	5128.9			BLM	16803.5	1503.2	1503.2
		BLM	17209.4			BLM	17119	1818.7	1818.7
		PICH	5777.6			BLM	17209.4	1909.1	1909.1
		BLM	17063.6			BLM	17063.6	1763.3	1763.3
	RPE1siSgo1-STB-ICRF_rBLMPICHCEN-02 z9-23				RPE1siSgo1-STB-ICRF_rBLMPICHCEN-02 z9-23
	Background	PICH	2537.4		Background	PICH	2537.4
	Background	BLM	9903.7		Background	BLM	9903.7
		PICH	3819			PICH	3819	1281.6	1281.6		1281.6	513.8
		BLM	10417.5			PICH	4578	2040.6	2040.6		2040.6	1403.4
		PICH	4578			PICH	4446	1908.6	1908.6		1908.6	1289.9
		BLM	11307.1			PICH	4770.7	2233.3	2233.3		2233.3	1812.7
		PICH	4446			PICH	4277.2	1739.8	1739.8		1739.8	839.6
		BLM	11193.6			PICH	5318.2	2780.8	2780.8		2780.8	1267.5
		PICH	4770.7			PICH	3527.4	990	990		990	434.1
		BLM	11716.4			PICH	3982.8	1445.4	1445.4		1445.4	1622.4
		PICH	4277.2			PICH	3527.3	989.9	989.9		989.9	443.4
		BLM	10743.3			BLM	10417.5	513.8	513.8
		PICH	5318.2			BLM	11307.1	1403.4	1403.4
		BLM	11171.2			BLM	11193.6	1289.9	1289.9
		PICH	3527.4			BLM	11716.4	1812.7	1812.7
		BLM	10337.8			BLM	10743.3	839.6	839.6
		PICH	3982.8			BLM	11171.2	1267.5	1267.5
		BLM	11526.1			BLM	10337.8	434.1	434.1
		PICH	3527.3			BLM	11526.1	1622.4	1622.4
		BLM	10347.1			BLM	10347.1	443.4	443.4
	RPE1siSgo1-STB-ICRF_rBLMPICHCEN-03 z10-18				RPE1siSgo1-STB-ICRF_rBLMPICHCEN-03 z10-18
	Background	PICH	3508.9		Background	PICH	3508.9
	Background	BLM	11892.8		Background	BLM	11892.8
		PICH	4370.6			PICH	4370.6	861.7	861.7		861.7	0
		BLM	11534.4			PICH	4506.1	997.2	997.2		997.2	0
		PICH	4506.1			PICH	5311.5	1802.6	1802.6		1802.6	697.7
		BLM	11759.1			PICH	5088.5	1579.6	1579.6		1579.6	685.4
		PICH	5311.5			PICH	5620.5	2111.6	2111.6		2111.6	1618.6
		BLM	12590.5			PICH	6286.5	2777.6	2777.6		2777.6	2616.7
		PICH	5088.5			PICH	6030.4	2521.5	2521.5		2521.5	2729.7
		BLM	12578.2			PICH	5094.4	1585.5	1585.5		1585.5	527.8
		PICH	5620.5			PICH	4822.1	1313.2	1313.2		1313.2	776.8
		BLM	13511.4			PICH	5983.3	2474.4	2474.4		2474.4	1539
		PICH	6286.5			BLM	11534.4	-358.4	0
		BLM	14509.5			BLM	11759.1	-133.7	0
		PICH	6030.4			BLM	12590.5	697.7	697.7
		BLM	14622.5			BLM	12578.2	685.4	685.4
		PICH	5094.4			BLM	13511.4	1618.6	1618.6
		BLM	12420.6			BLM	14509.5	2616.7	2616.7
		PICH	4822.1			BLM	14622.5	2729.7	2729.7
		BLM	12669.6			BLM	12420.6	527.8	527.8
		PICH	5983.3			BLM	12669.6	776.8	776.8
		BLM	13431.8			BLM	13431.8	1539	1539
	RPE1siSgo1-STB-ICRF_rBLMPICHCEN-04 (left) z18-34				RPE1siSgo1-STB-ICRF_rBLMPICHCEN-04 (left) z18-34
	Background	PICH	4815.8		Background	PICH	4815.8
	Background	BLM	13718.7		Background	BLM	13718.7
		PICH	5736			PICH	5736	920.2	920.2		920.2	0
		BLM	13605.7			PICH	6760.1	1944.3	1944.3		1944.3	40.3
		PICH	6760.1			PICH	6638	1822.2	1822.2		1822.2	788.3
		BLM	13759			PICH	6655.9	1840.1	1840.1		1840.1	218.9
		PICH	6638			PICH	7234.4	2418.6	2418.6		2418.6	830.5
		BLM	14507			PICH	7277.8	2462	2462		2462	0
		PICH	6655.9			PICH	7183.9	2368.1	2368.1		2368.1	953.3
		BLM	13937.6			PICH	9130.2	4314.4	4314.4		4314.4	1306.2
		PICH	7234.4			PICH	7035	2219.2	2219.2		2219.2	1137.6
		BLM	14549.2			PICH	7089.8	2274	2274		2274	54.8
		PICH	7277.8			PICH	6228.2	1412.4	1412.4		1412.4	0
		BLM	13565.5			PICH	5381.7	565.9	565.9		565.9	0
		PICH	7183.9			BLM	13605.7	-113	0
		BLM	14672			BLM	13759	40.3	40.3
		PICH	9130.2			BLM	14507	788.3	788.3
		BLM	15024.9			BLM	13937.6	218.9	218.9
		PICH	7035			BLM	14549.2	830.5	830.5
		BLM	14856.3			BLM	13565.5	-153.2	0
		PICH	7089.8			BLM	14672	953.3	953.3
		BLM	13773.5			BLM	15024.9	1306.2	1306.2
		PICH	6228.2			BLM	14856.3	1137.6	1137.6
		BLM	13353.3			BLM	13773.5	54.8	54.8
		PICH	5381.7			BLM	13353.3	-365.4	0
		BLM	13082.7			BLM	13082.7	-636	0
	RPE1siSgo1-STB-ICRF_rBLMPICHCEN-04 (right) z13-27				RPE1siSgo1-STB-ICRF_rBLMPICHCEN-04 (right) z13-27
	Background	PICH	4434.4		Background	PICH	4434.4
	Background	BLM	14000.7		Background	BLM	14000.7
		PICH	5091.6			PICH	5091.6	657.2	657.2		657.2	0
		BLM	13153.2			PICH	6129.3	1694.9	1694.9		1694.9	868.3
		PICH	6129.3			PICH	7263.8	2829.4	2829.4		2829.4	2136
		BLM	14869			PICH	6200.7	1766.3	1766.3		1766.3	1642.3
		PICH	7263.8			PICH	7423.3	2988.9	2988.9		2988.9	2262.4
		BLM	16136.7			PICH	8394.1	3959.7	3959.7		3959.7	2586.3
		PICH	6200.7			PICH	5138.9	704.5	704.5		704.5	0
		BLM	15643			PICH	5995.8	1561.4	1561.4		1561.4	0
		PICH	7423.3			PICH	6851	2416.6	2416.6		2416.6	1776.8
		BLM	16263.1			PICH	5341.1	906.7	906.7		906.7	0
		PICH	8394.1			BLM	13153.2	-847.5	0
		BLM	16587			BLM	14869	868.3	868.3
		PICH	5138.9			BLM	16136.7	2136	2136
		BLM	13878.8			BLM	15643	1642.3	1642.3
		PICH	5995.8			BLM	16263.1	2262.4	2262.4
		BLM	14000.1			BLM	16587	2586.3	2586.3
		PICH	6851			BLM	13878.8	-121.9	0
		BLM	15777.5			BLM	14000.1	-0.6	0
		PICH	5341.1			BLM	15777.5	1776.8	1776.8
		BLM	13596.3			BLM	13596.3	-404.4	0
	RPE1siSgo1-STB-ICRF_rBLMPICHCEN-05(top) z10-33				RPE1siSgo1-STB-ICRF_rBLMPICHCEN-05(top) z10-33
	Background	PICH	2566.8		Background	PICH	2566.8
	Background	BLM	13198.9		Background	BLM	13198.9
		PICH	4627.8			PICH	4627.8	2061	2061		2061	173.7
		BLM	13372.6			PICH	4085.5	1518.7	1518.7		1518.7	523.3
		PICH	4085.5			PICH	4329.1	1762.3	1762.3		1762.3	1633
		BLM	13722.2			PICH	4150.6	1583.8	1583.8		1583.8	1175.9
		PICH	4329.1			PICH	3907.8	1341	1341		1341	1634.6
		BLM	14831.9			BLM	13372.6	173.7	173.7
		PICH	4150.6			BLM	13722.2	523.3	523.3
		BLM	14374.8			BLM	14831.9	1633	1633
		PICH	3907.8			BLM	14374.8	1175.9	1175.9
		BLM	14833.5			BLM	14833.5	1634.6	1634.6
	RPE1siSgo1-STB-ICRF_rBLMPICHCEN-06 z10-26				RPE1siSgo1-STB-ICRF_rBLMPICHCEN-06 z10-26
	Background	PICH	2661.9		Background	PICH	2661.9
	Background	BLM	17235.9		Background	BLM	17235.9
		PICH	5360.8			PICH	5360.8	2698.9	2698.9		2698.9	0
		BLM	15953.3			PICH	6216.9	3555	3555		3555	1678.4
		PICH	6216.9			PICH	5792.9	3131	3131		3131	341.4
		BLM	18914.3			PICH	5938	3276.1	3276.1		3276.1	733.1
		PICH	5792.9			PICH	7624.6	4962.7	4962.7		4962.7	1740.4
		BLM	17577.3			PICH	6289.5	3627.6	3627.6		3627.6	1149.3
		PICH	5938			PICH	6169.5	3507.6	3507.6		3507.6	624.5
		BLM	17969			PICH	5910.8	3248.9	3248.9		3248.9	364.3
		PICH	7624.6			PICH	7065.6	4403.7	4403.7		4403.7	0
		BLM	18976.3			PICH	5418.8	2756.9	2756.9		2756.9	0
		PICH	6289.5			BLM	15953.3	-1282.6	0
		BLM	18385.2			BLM	18914.3	1678.4	1678.4
		PICH	6169.5			BLM	17577.3	341.4	341.4
		BLM	17860.4			BLM	17969	733.1	733.1
		PICH	5910.8			BLM	18976.3	1740.4	1740.4
		BLM	17600.2			BLM	18385.2	1149.3	1149.3
		PICH	7065.6			BLM	17860.4	624.5	624.5
		BLM	15994.4			BLM	17600.2	364.3	364.3
		PICH	5418.8			BLM	15994.4	-1241.5	0
		BLM	15827			BLM	15827	-1408.9	0
	RPE1siSgo1-STB-ICRF_rBLMPICHCEN-07(left) z13-31				RPE1siSgo1-STB-ICRF_rBLMPICHCEN-07(left) z13-31
	Background	PICH	3805.9		Background	PICH	3805.9
	Background	BLM	14551.6		Background	BLM	14551.6
		PICH	6387.7			PICH	6387.7	2581.8	2581.8		2581.8	1100.9
		BLM	15652.5			PICH	6528.5	2722.6	2722.6		2722.6	835.7
		PICH	6528.5			PICH	7071.2	3265.3	3265.3		3265.3	1037.7
		BLM	15387.3			PICH	6157.6	2351.7	2351.7		2351.7	804.6
		PICH	7071.2			PICH	6343.4	2537.5	2537.5		2537.5	1294.8
		BLM	15589.3			PICH	7764.8	3958.9	3958.9		3958.9	2249.3
		PICH	6157.6			PICH	7630.5	3824.6	3824.6		3824.6	3081
		BLM	15356.2			PICH	6765.7	2959.8	2959.8		2959.8	697
		PICH	6343.4			BLM	15652.5	1100.9	1100.9
		BLM	15846.4			BLM	15387.3	835.7	835.7
		PICH	7764.8			BLM	15589.3	1037.7	1037.7
		BLM	16800.9			BLM	15356.2	804.6	804.6
		PICH	7630.5			BLM	15846.4	1294.8	1294.8
		BLM	17632.6			BLM	16800.9	2249.3	2249.3
		PICH	6765.7			BLM	17632.6	3081	3081
		BLM	15248.6			BLM	15248.6	697	697
	RPE1siSgo1-STB-ICRF_rBLMPICHCEN-08 z5-29				RPE1siSgo1-STB-ICRF_rBLMPICHCEN-08 z5-29
	Background	PICH	2490.8		Background	PICH	2490.8
	Background	BLM	12014		Background	BLM	12014
		PICH	4739.3			PICH	4739.3	2248.5	2248.5		2248.5	1358.1
		BLM	13372.1			PICH	5626.9	3136.1	3136.1		3136.1	1900
		PICH	5626.9			PICH	7134.5	4643.7	4643.7		4643.7	4073.5
		BLM	13914			PICH	7376.4	4885.6	4885.6		4885.6	4341.3
		PICH	7134.5			PICH	7077.9	4587.1	4587.1		4587.1	4274.4
		BLM	16087.5			PICH	8542.7	6051.9	6051.9		6051.9	5396.3
		PICH	7376.4			PICH	7420.3	4929.5	4929.5		4929.5	3562.5
		BLM	16355.3			PICH	4206.1	1715.3	1715.3		1715.3	0
		PICH	7077.9			PICH	4224.6	1733.8	1733.8		1733.8	0
		BLM	16288.4			PICH	4969.9	2479.1	2479.1		2479.1	791.2
		PICH	8542.7			BLM	13372.1	1358.1	1358.1
		BLM	17410.3			BLM	13914	1900	1900
		PICH	7420.3			BLM	16087.5	4073.5	4073.5
		BLM	15576.5			BLM	16355.3	4341.3	4341.3
		PICH	4206.1			BLM	16288.4	4274.4	4274.4
		BLM	10998.3			BLM	17410.3	5396.3	5396.3
		PICH	4224.6			BLM	15576.5	3562.5	3562.5
		BLM	11052.3			BLM	10998.3	-1015.7	0
		PICH	4969.9			BLM	11052.3	-961.7	0
		BLM	12805.2			BLM	12805.2	791.2	791.2
	RPE1siSgo1-STB-ICRF_rBLMPICHCEN-09 z6-17				RPE1siSgo1-STB-ICRF_rBLMPICHCEN-09 z6-17
	Background	PICH	2593.8		Background	PICH	2593.8
	Background	BLM	10985.8		Background	BLM	10985.8
		PICH	5460.1			PICH	5460.1	2866.3	2866.3		2866.3	0
		BLM	10029			PICH	4572.5	1978.7	1978.7		1978.7	0
		PICH	4572.5			PICH	4576.5	1982.7	1982.7		1982.7	0
		BLM	9768.2			PICH	6123.6	3529.8	3529.8		3529.8	272.5
		PICH	4576.5			PICH	6375.7	3781.9	3781.9		3781.9	1388.9
		BLM	9991.5			PICH	5599.9	3006.1	3006.1		3006.1	1438.7
		PICH	6123.6			PICH	7060.4	4466.6	4466.6		4466.6	789
		BLM	11258.3			PICH	6948.1	4354.3	4354.3		4354.3	0
		PICH	6375.7			PICH	5797.3	3203.5	3203.5		3203.5	0
		BLM	12374.7			PICH	5495.1	2901.3	2901.3		2901.3	0
		PICH	5599.9			PICH	5080.3	2486.5	2486.5		2486.5	0
		BLM	12424.5			PICH	4322.2	1728.4	1728.4		1728.4	0
		PICH	7060.4			PICH	4302.2	1708.4	1708.4		1708.4	0
		BLM	11774.8			PICH	4736.4	2142.6	2142.6		2142.6	0
		PICH	6948.1			BLM	10029	-956.8	0
		BLM	10795.7			BLM	9768.2	-1217.6	0
		PICH	5797.3			BLM	9991.5	-994.3	0
		BLM	10067			BLM	11258.3	272.5	272.5
		PICH	5495.1			BLM	12374.7	1388.9	1388.9
		BLM	10397.1			BLM	12424.5	1438.7	1438.7
		PICH	5080.3			BLM	11774.8	789	789
		BLM	10385.2			BLM	10795.7	-190.1	0
		PICH	4322.2			BLM	10067	-918.8	0
		BLM	9832.1			BLM	10397.1	-588.7	0
		PICH	4302.2			BLM	10385.2	-600.6	0
		BLM	9854.7			BLM	9832.1	-1153.7	0
		PICH	4736.4			BLM	9854.7	-1131.1	0
		BLM	10077			BLM	10077	-908.8	0
	RPE1siSgo1-STB-ICRF_rBLMPICHCEN-10 z13-21				RPE1siSgo1-STB-ICRF_rBLMPICHCEN-10 z13-21
	Background	PICH	2279.6		Background	PICH	2279.6
	Background	BLM	12208.1		Background	BLM	12208.1
		PICH	3799			PICH	3799	1519.4	1519.4		1519.4	0
		BLM	12014.2			PICH	4383.6	2104	2104		2104	1146.7
		PICH	4383.6			PICH	4131.5	1851.9	1851.9		1851.9	2014.6
		BLM	13354.8			PICH	4911.7	2632.1	2632.1		2632.1	2646.1
		PICH	4131.5			PICH	4510	2230.4	2230.4		2230.4	2229.9
		BLM	14222.7			PICH	4160.3	1880.7	1880.7		1880.7	2442.5
		PICH	4911.7			PICH	4132.6	1853	1853		1853	1563.3
		BLM	14854.2			BLM	12014.2	-193.9	0
		PICH	4510			BLM	13354.8	1146.7	1146.7
		BLM	14438			BLM	14222.7	2014.6	2014.6
		PICH	4160.3			BLM	14854.2	2646.1	2646.1
		BLM	14650.6			BLM	14438	2229.9	2229.9
		PICH	4132.6			BLM	14650.6	2442.5	2442.5
		BLM	13771.4			BLM	13771.4	1563.3	1563.3
	RPE1siSgo1-STB-ICRF_rBLMPICHCEN-11 z1-12				RPE1siSgo1-STB-ICRF_rBLMPICHCEN-11 z1-12
	Background	PICH	2147.5		Background	PICH	2147.5
	Background	BLM	10421.1		Background	BLM	10421.1
		PICH	3915.7			PICH	3915.7	1768.2	1768.2		1768.2	795.8
		BLM	11216.9			PICH	5437.2	3289.7	3289.7		3289.7	3554.4
		PICH	5437.2			PICH	4498.7	2351.2	2351.2		2351.2	2441.2
		BLM	13975.5			PICH	5256.1	3108.6	3108.6		3108.6	2655.9
		PICH	4498.7			PICH	5982	3834.5	3834.5		3834.5	2675.1
		BLM	12862.3			PICH	4327.5	2180	2180		2180	1097.9
		PICH	5256.1			PICH	3631	1483.5	1483.5		1483.5	1974.9
		BLM	13077			PICH	4363.3	2215.8	2215.8		2215.8	1878
		PICH	5982			PICH	3790.7	1643.2	1643.2		1643.2	1994.7
		BLM	13096.2			PICH	4402.3	2254.8	2254.8		2254.8	533.3
		PICH	4327.5			PICH	4040.8	1893.3	1893.3		1893.3	1186.1
		BLM	11519			PICH	4412.6	2265.1	2265.1		2265.1	3301.7
		PICH	3631			PICH	4106.6	1959.1	1959.1		1959.1	221.9
		BLM	12396			PICH	3750.6	1603.1	1603.1		1603.1	604.9
		PICH	4363.3			BLM	11216.9	795.8	795.8
		BLM	12299.1			BLM	13975.5	3554.4	3554.4
		PICH	3790.7			BLM	12862.3	2441.2	2441.2
		BLM	12415.8			BLM	13077	2655.9	2655.9
		PICH	4402.3			BLM	13096.2	2675.1	2675.1
		BLM	10954.4			BLM	11519	1097.9	1097.9
		PICH	4040.8			BLM	12396	1974.9	1974.9
		BLM	11607.2			BLM	12299.1	1878	1878
		PICH	4412.6			BLM	12415.8	1994.7	1994.7
		BLM	13722.8			BLM	10954.4	533.3	533.3
		PICH	4106.6			BLM	11607.2	1186.1	1186.1
		BLM	10643			BLM	13722.8	3301.7	3301.7
		PICH	3750.6			BLM	10643	221.9	221.9
		BLM	11026			BLM	11026	604.9	604.9
	RPE1siSgo1-STB-ICRF_rBLMPICHCEN-12 z9-28				RPE1siSgo1-STB-ICRF_rBLMPICHCEN-12 z9-28
	Background	PICH	2863.3		Background	PICH	2863.3
	Background	BLM	13576.6		Background	BLM	13576.6
		PICH	5313.8			PICH	5313.8	2450.5	2450.5		2450.5	0
		BLM	12699.7			PICH	5869	3005.7	3005.7		3005.7	0
		PICH	5869			PICH	6585.2	3721.9	3721.9		3721.9	0
		BLM	11565.8			PICH	7574	4710.7	4710.7		4710.7	781.6
		PICH	6585.2			PICH	5436.8	2573.5	2573.5		2573.5	0
		BLM	11844.2			PICH	5629.5	2766.2	2766.2		2766.2	0
		PICH	7574			PICH	6988.3	4125	4125		4125	0
		BLM	14358.2			PICH	8026.9	5163.6	5163.6		5163.6	0
		PICH	5436.8			PICH	5769.9	2906.6	2906.6		2906.6	0
		BLM	12233.8			PICH	6041.9	3178.6	3178.6		3178.6	0
		PICH	5629.5			PICH	5691.8	2828.5	2828.5		2828.5	0
		BLM	12686.8			PICH	6800.6	3937.3	3937.3		3937.3	0
		PICH	6988.3			PICH	6149.6	3286.3	3286.3		3286.3	0
		BLM	12613.4			PICH	6288.2	3424.9	3424.9		3424.9	302.6
		PICH	8026.9			BLM	12699.7	-876.9	0
		BLM	12109.3			BLM	11565.8	-2010.8	0
		PICH	5769.9			BLM	11844.2	-1732.4	0
		BLM	11537.9			BLM	14358.2	781.6	781.6
		PICH	6041.9			BLM	12233.8	-1342.8	0
		BLM	12810.3			BLM	12686.8	-889.8	0
		PICH	5691.8			BLM	12613.4	-963.2	0
		BLM	12121.2			BLM	12109.3	-1467.3	0
		PICH	6800.6			BLM	11537.9	-2038.7	0
		BLM	13044.8			BLM	12810.3	-766.3	0
		PICH	6149.6			BLM	12121.2	-1455.4	0
		BLM	11930.1			BLM	13044.8	-531.8	0
		PICH	6288.2			BLM	11930.1	-1646.5	0
		BLM	13879.2			BLM	13879.2	302.6	302.6
	RPE1siSgo1-STB-ICRF_rBLMPICHCEN-13(left) z14-36				RPE1siSgo1-STB-ICRF_rBLMPICHCEN-13(left) z14-36
	Background	PICH	3293.3		Background	PICH	3293.3
	Background	BLM	13492.9		Background	BLM	13492.9
		PICH	4178.8			PICH	4178.8	885.5	885.5		885.5	1197
		BLM	14689.9			PICH	5540.4	2247.1	2247.1		2247.1	3172.7
		PICH	5540.4			PICH	5292.8	1999.5	1999.5		1999.5	2848.5
		BLM	16665.6			PICH	5012.2	1718.9	1718.9		1718.9	864.8
		PICH	5292.8			PICH	4717.9	1424.6	1424.6		1424.6	1355.3
		BLM	16341.4			PICH	4429.9	1136.6	1136.6		1136.6	582
		PICH	5012.2			PICH	3551.2	257.9	257.9		257.9	0
		BLM	14357.7			BLM	14689.9	1197	1197
		PICH	4717.9			BLM	16665.6	3172.7	3172.7
		BLM	14848.2			BLM	16341.4	2848.5	2848.5
		PICH	4429.9			BLM	14357.7	864.8	864.8
		BLM	14074.9			BLM	14848.2	1355.3	1355.3
		PICH	3551.2			BLM	14074.9	582	582
		BLM	11807.6			BLM	11807.6	-1685.3	0
	RPE1siSgo1-STB-ICRF_rBLMPICHCEN-13(rigth) z20-34				RPE1siSgo1-STB-ICRF_rBLMPICHCEN-13(rigth) z20-34
	Background	PICH	2651		Background	PICH	2651
	Background	BLM	12417.7		Background	BLM	12417.7
		PICH	4948.5			PICH	4948.5	2297.5	2297.5		2297.5	0
		BLM	11588.5			PICH	6603.1	3952.1	3952.1		3952.1	838.2
		PICH	6603.1			PICH	4428.9	1777.9	1777.9		1777.9	0
		BLM	13255.9			BLM	11588.5	-829.2	0
		PICH	4428.9			BLM	13255.9	838.2	838.2
		BLM	12272.9			BLM	12272.9	-144.8	0
	RPE1siSgo1-STB-ICRF_rBLMPICHCEN-14 z12-20				RPE1siSgo1-STB-ICRF_rBLMPICHCEN-14 z12-20
	Background	PICH	2730.4		Background	PICH	2730.4
	Background	BLM	13196.3		Background	BLM	13196.3
		PICH	4224			PICH	4224	1493.6	1493.6		1493.6	0
		BLM	13133			PICH	6019.6	3289.2	3289.2		3289.2	0
		PICH	6019.6			PICH	4826.3	2095.9	2095.9		2095.9	0
		BLM	12642.6			BLM	13133	-63.3	0
		PICH	4826.3			BLM	12642.6	-553.7	0
		BLM	12937			BLM	12937	-259.3	0
	RPE1siSgo1-STB-ICRF_rBLMPICHCEN-15 (left, top)				RPE1siSgo1-STB-ICRF_rBLMPICHCEN-15 (left, top)
	Background	PICH	2680.5		Background	PICH	2680.5
	Background	BLM	11853.4		Background	BLM	11853.4
		PICH	3880.2			PICH	3880.2	1199.7	1199.7		1199.7	0
		BLM	11385.5			PICH	4861.8	2181.3	2181.3		2181.3	339
		PICH	4861.8			PICH	4656.1	1975.6	1975.6		1975.6	248.9
		BLM	12192.4			PICH	4626.6	1946.1	1946.1		1946.1	0
		PICH	4656.1			PICH	4308.6	1628.1	1628.1		1628.1	0
		BLM	12102.3			PICH	4520.4	1839.9	1839.9		1839.9	0
		PICH	4626.6			PICH	4628.6	1948.1	1948.1		1948.1	30.6
		BLM	11742.9			BLM	11385.5	-467.9	0
		PICH	4308.6			BLM	12192.4	339	339
		BLM	11286			BLM	12102.3	248.9	248.9
		PICH	4520.4			BLM	11742.9	-110.5	0
		BLM	10552.1			BLM	11286	-567.4	0
		PICH	4628.6			BLM	10552.1	-1301.3	0
		BLM	11884			BLM	11884	30.6	30.6
	RPE1siSgo1-STB-ICRF_rBLMPICHCEN-16 z10-28				RPE1siSgo1-STB-ICRF_rBLMPICHCEN-16 z10-28
	Background	PICH	2864.1		Background	PICH	2864.1
	Background	BLM	13135.4		Background	BLM	13135.4
		PICH	4902.7			PICH	4902.7	2038.6	2038.6		2038.6	424.3
		BLM	13559.7			PICH	4863	1998.9	1998.9		1998.9	896.4
		PICH	4863			PICH	5671.5	2807.4	2807.4		2807.4	1981.6
		BLM	14031.8			PICH	6548.4	3684.3	3684.3		3684.3	2736.4
		PICH	5671.5			PICH	5101.5	2237.4	2237.4		2237.4	690.4
		BLM	15117			PICH	6240	3375.9	3375.9		3375.9	2127.4
		PICH	6548.4			PICH	4277.8	1413.7	1413.7		1413.7	0
		BLM	15871.8			BLM	13559.7	424.3	424.3
		PICH	5101.5			BLM	14031.8	896.4	896.4
		BLM	13825.8			BLM	15117	1981.6	1981.6
		PICH	6240			BLM	15871.8	2736.4	2736.4
		BLM	15262.8			BLM	13825.8	690.4	690.4
		PICH	4277.8			BLM	15262.8	2127.4	2127.4
		BLM	12643.9			BLM	12643.9	-491.5	0
	RPE1siSgo1-STB-ICRF_rBLMPICHCEN-17 z13-28				RPE1siSgo1-STB-ICRF_rBLMPICHCEN-17 z13-28
	Background	PICH	2432.8		Background	PICH	2432.8
	Background	BLM	11917.2		Background	BLM	11917.2
		PICH	5191.9			PICH	5191.9	2759.1	2759.1		2759.1	2659.5
		BLM	14576.7			PICH	4543.3	2110.5	2110.5		2110.5	2218.8
		PICH	4543.3			PICH	4485.9	2053.1	2053.1		2053.1	2304.5
		BLM	14136			PICH	5040.2	2607.4	2607.4		2607.4	2571.5
		PICH	4485.9			PICH	4725.8	2293	2293		2293	1808.9
		BLM	14221.7			PICH	3451.4	1018.6	1018.6		1018.6	0
		PICH	5040.2			PICH	2577.1	144.3	144.3		144.3	0
		BLM	14488.7			BLM	14576.7	2659.5	2659.5
		PICH	4725.8			BLM	14136	2218.8	2218.8
		BLM	13726.1			BLM	14221.7	2304.5	2304.5
		PICH	3451.4			BLM	14488.7	2571.5	2571.5
		BLM	10531.3			BLM	13726.1	1808.9	1808.9
		PICH	2577.1			BLM	10531.3	-1385.9	0
		BLM	11518			BLM	11518	-399.2	0
	RPE1siSgo1-STB-ICRF_rBLMPICHCEN-18 z12-28				RPE1siSgo1-STB-ICRF_rBLMPICHCEN-18 z12-28
	Background	PICH	2439.1		Background	PICH	2439.1
	Background	BLM	13077.3		Background	BLM	13077.3
		PICH	3913.8			PICH	3913.8	1474.7	1474.7		1474.7	1088.9
		BLM	14166.2			PICH	3962.8	1523.7	1523.7		1523.7	1598.6
		PICH	3962.8			PICH	3919	1479.9	1479.9		1479.9	1176.1
		BLM	14675.9			PICH	4191.1	1752	1752		1752	1619.2
		PICH	3919			PICH	4944.4	2505.3	2505.3		2505.3	2349.3
		BLM	14253.4			PICH	4243	1803.9	1803.9		1803.9	1761.7
		PICH	4191.1			PICH	3452.5	1013.4	1013.4		1013.4	0
		BLM	14696.5			PICH	3619.3	1180.2	1180.2		1180.2	1786.8
		PICH	4944.4			PICH	3207.3	768.2	768.2		768.2	0
		BLM	15426.6			BLM	14166.2	1088.9	1088.9
		PICH	4243			BLM	14675.9	1598.6	1598.6
		BLM	14839			BLM	14253.4	1176.1	1176.1
		PICH	3452.5			BLM	14696.5	1619.2	1619.2
		BLM	12676.5			BLM	15426.6	2349.3	2349.3
		PICH	3619.3			BLM	14839	1761.7	1761.7
		BLM	14864.1			BLM	12676.5	-400.8	0
		PICH	3207.3			BLM	14864.1	1786.8	1786.8
		BLM	12700			BLM	12700	-377.3	0
	RPE1siSgo1-STB-ICRF_rBLMPICHCEN-19 z12-24				RPE1siSgo1-STB-ICRF_rBLMPICHCEN-19 z12-24
	Background	PICH	2927.4		Background	PICH	2927.4
	Background	BLM	12282.2		Background	BLM	12282.2
		PICH	5151.3			PICH	5151.3	2223.9	2223.9		2223.9	1296.2
		BLM	13578.4			PICH	3924.1	996.7	996.7		996.7	0
		PICH	3924.1			PICH	5036.5	2109.1	2109.1		2109.1	717.9
		BLM	12083.1			PICH	4763.1	1835.7	1835.7		1835.7	1134.4
		PICH	5036.5			PICH	4785.5	1858.1	1858.1		1858.1	1179.3
		BLM	13000.1			PICH	4154.6	1227.2	1227.2		1227.2	182.3
		PICH	4763.1			BLM	13578.4	1296.2	1296.2
		BLM	13416.6			BLM	12083.1	-199.1	0
		PICH	4785.5			BLM	13000.1	717.9	717.9
		BLM	13461.5			BLM	13416.6	1134.4	1134.4
		PICH	4154.6			BLM	13461.5	1179.3	1179.3
		BLM	12464.5			BLM	12464.5	182.3	182.3
	RPE1siSgo1-STB-ICRF_rBLMPICHCEN-20 (top) z15-35				RPE1siSgo1-STB-ICRF_rBLMPICHCEN-20 (top) z15-35
	Background	PICH	2246.9		Background	PICH	2246.9
	Background	BLM	10517.6		Background	BLM	10517.6
		PICH	4209.6			PICH	4209.6	1962.7	1962.7		1962.7	0
		BLM	9521.5			PICH	4714.5	2467.6	2467.6		2467.6	282.5
		PICH	4714.5			PICH	4988.8	2741.9	2741.9		2741.9	1527.9
		BLM	10800.1			PICH	4352.9	2106	2106		2106	1209.8
		PICH	4988.8			PICH	4224.5	1977.6	1977.6		1977.6	0
		BLM	12045.5			PICH	4782.7	2535.8	2535.8		2535.8	38.9
		PICH	4352.9			PICH	4436	2189.1	2189.1		2189.1	0
		BLM	11727.4			PICH	3988.2	1741.3	1741.3		1741.3	0
		PICH	4224.5			PICH	5606.2	3359.3	3359.3		3359.3	0
		BLM	10286.7			PICH	4664.9	2418	2418		2418	0
		PICH	4782.7			PICH	5483.4	3236.5	3236.5		3236.5	142.5
		BLM	10556.5			PICH	5278.7	3031.8	3031.8		3031.8	883.6
		PICH	4436			PICH	4786	2539.1	2539.1		2539.1	233.2
		BLM	10398.1			PICH	4211.9	1965	1965		1965	0
		PICH	3988.2			BLM	9521.5	-996.1	0
		BLM	9712.6			BLM	10800.1	282.5	282.5
		PICH	5606.2			BLM	12045.5	1527.9	1527.9
		BLM	10340.9			BLM	11727.4	1209.8	1209.8
		PICH	4664.9			BLM	10286.7	-230.9	0
		BLM	10407.4			BLM	10556.5	38.9	38.9
		PICH	5483.4			BLM	10398.1	-119.5	0
		BLM	10660.1			BLM	9712.6	-805	0
		PICH	5278.7			BLM	10340.9	-176.7	0
		BLM	11401.2			BLM	10407.4	-110.2	0
		PICH	4786			BLM	10660.1	142.5	142.5
		BLM	10750.8			BLM	11401.2	883.6	883.6
		PICH	4211.9			BLM	10750.8	233.2	233.2
		BLM	9812.9			BLM	9812.9	-704.7	0
