# Supplementary material for: Centromere protection requires strict mitotic inactivation of the Bloom syndrome helicase complex
Source: Research Square preprint supplement (doi:10.21203/rs.3.rs-4420374/v1), 2024-05-30
Supplement: Supplementary file 7 [file Fig 1D,E. RPE1 siSGO1+BI_Sister-chromatid separation distance.xlsx]

## Sheet: RPE1v-siSGO1 23-02-2024
sister chromatids separation distance (um)
			Untreated						BI2536
	Cell	Image no	-ve	RPA threads No.	SC separation feature			Image no	+ve	RPA threads no.	SC separation feature
	1	1a	14		Disorganised			1	16.8		Disorganised
	2	1b	15.8		Disorganised			2	17.7		Anaphase-like
	3	3	16.5		Disorganised			3	19.2		Anaphase-like
	4	4a	17.5		Disorganised			4	18		Disorganised
	5	4b	12.9		Disorganised			5	19.5		Anaphase-like
	6	5	15.1		Early Anaphase-like			6	17.8		Disorganised
	7	6	15.6		Partial			7	20.6		Anaphase-like
	8	7	14		Partial			8	18		Disorganised
	9	8	14.5		Disorganised			9	15.1		Early Anaphase-like
	10	9	15.5		Early Anaphase-like			10	22.4		Anaphase-like
	11	10	17.2		Partial			11	20		Anaphase-like
	12	11	15.1		Partial			12	14.4		Disorganised
	13	12	14		Disorganised			13	15.6		Early Anaphase-like
	14	13	15		Disorganised			14	20.4		Anaphase-like
	15	14	13.6		Disorganised			15	18.6		partial
	16	15a	16.3		Disorganised			16	18		Anaphase-like
	17	15b	16.5		Disorganised			17	16.8		Anaphase-like
	18	16	15.3		Disorganised			18a	19.8		Disorganised
	19	17	12		Partial			18b	19		Disorganised
	20	18	15.7		Disorganised			19	15.8		partial
	21	19a	17.3		Anaphase-like			20	18.7		Disorganised
	22	19b	14.4		Partial			21	18.3		Disorganised
	23	20	13.4		Disorganised			22	16.1		Disorganised
	24	21	14		Partial			23	16.2		Disorganised
	25	22	16.2		Partial			24	21		Anaphase-like
	26	23	15.3		Disorganised			25	15.2		partial
	27	24	14.9		Disorganised			26	17.4		Anaphase-like
	28	25	15.9		Disorganised			27	17.3		Anaphase-like
	29	26	17		Disorganised			28	17.1		Anaphase-like
	30	27	13.5		Disorganised			30	14.2		Early Anaphase-like
	31	28	12.4		Partial			31	15.3		Early Anaphase-like
	32	29	14.6		Disorganised			32	17.9		Early Anaphase-like
	33	30	14.7		Partial			33	17.8		Disorganised
	34	31	17.6		Disorganised			34	20.9		Anaphase-like
	35	32a	15.5		Disorganised			35	16		Early Anaphase-like
	36	32b	15.2		Disorganised			36	16		Disorganised
	37	33	16.3		Partial			37	17.1		Early Anaphase-like
	38	34	17.5		Partial			38	16.4		Disorganised
	39	35a	16.7		Disorganised			39	17.5		Anaphase-like
	40	35b	15.7		Disorganised			40	19.3		partial
	41	36	16		Early Anaphase-like			41a	18.1		Anaphase-like
	42	37a	16.3		Disorganised			41b	17.3		Anaphase-like
	43	37b	17		Disorganised			42	20.5		Anaphase-like
	44	38	18		Disorganised			43	19.5		Anaphase-like
	45	39	15.9		Disorganised			44	18.5		partial
	46	40	14.4		Disorganised			45	15		partial
	47	41	13.8		Disorganised			46	17.5		Anaphase-like
	48	42	15.9		Partial			47	16		Disorganised
	49	43	15.8		Disorganised			48	18.4		Early Anaphase-like
	50	44	16		Disorganised			49	18.4		Early Anaphase-like
	51	45	15.2		Early Anaphase-like			50	17.6		Early Anaphase-like
	52	46	11.6		Disorganised			51	18.4		Partial
	53	47	14.7		Disorganised			52a	15		Disorganised
	54	48	18.7		Disorganised			52b	17.8		Disorganised
	55	49	19.2		Disorganised			53	15.7		Anaphase-like
	56	50	16.2		Disorganised			54	17.5		Disorganised
	57							55	17.3		Anaphase-like
	58							56	21		Anaphase-like
	59							57	17		Disorganised
	60							58	19.6		Anaphase-like
	61							59	19.8		Disorganised
	62							60	14.5		Early Anaphase-like
	63							61	18.5		Anaphase-like
				Disorganised	38	0.678571				Disorganised	20	0.31746
				Partial	13	0.232143				Partial	7	0.111111
				Early anaphase-like	4	0.0714286				Early anaphase-like	11	0.174603
				Anaphase-like	1	0.0178571				Anaphase-like	25	0.396825
				Total	56	1				Total	63	1
					Untreated	BI2536
				Disorganised	0.603175	0.31746
				Partial	0.206349	0.111111
				Early anaphase-like	0.0634921	0.174603
				Anaphase-like	0.015873	0.396825

## Sheet: siSGO1 01-03-2024
sister chromatids separation distance (um)
			Untreated							BI2536
	Cell	Image no	-ve	RPA threads No.	SC separation feature				Image no	+ve	RPA threads no.	SC separation feature
	1	1			Early Anaphase-like				1a			Early Anaphase-like
	2	2			Partial				1b			Anaphase-like
	3	3			Disorganised				1c			Disorganised
	4	4			Disorganised				2			Early Anaphase-like
	5	5			Disorganised				3			Partial
	6	6			Disorganised				4			Disorganised
	7	7			Partial				5			Partial
	8	8			Disorganised				6			Anaphase-like
	9	9			Partial				7			Disorganised
	10	10			Early Anaphase-like				8			Early Anaphase-like
	11	11			Disorganised				9			Anaphase-like
	12	12			Partial				10			Anaphase-like
	13	13			Disorganised				11			Anaphase-like
	14	14			Disorganised				12			Partial
	15	15			Disorganised				13			Disorganised
	16	16			Early Anaphase-like				14			Early Anaphase-like
	17	17			Partial				15			Anaphase-like
	18	18			Partial				16			Disorganised
	19	19			Disorganised				17			Disorganised
	20	20			Disorganised				18			Early Anaphase-like
	21	21			Disorganised				19			Anaphase-like
	22	22			Partial				20			Anaphase-like
	23	23			Disorganised				21			Partial
	24	24			Partial				22			Disorganised
	25	25			Disorganised				23			Early Anaphase-like
	26	26			Early Anaphase-like				24			Anaphase-like
	27	27			Early Anaphase-like				25			Disorganised
	28	28a			Disorganised				26			Partial
	29	28b			Disorganised				27			Early Anaphase-like
	30	29			Partial				28a			Partial
	31	30			Early Anaphase-like				28b			Anaphase-like
	32	31			Disorganised				29			Disorganised
	33	32			Disorganised				30			Anaphase-like
	34	33			Disorganised				31			Anaphase-like
	35	34			Disorganised				32			Partial
	36	35			Disorganised				33			Partial
	37	36			Partial				34			Disorganised
	38	37			Disorganised				35			Early Anaphase-like
	39	38			Early Anaphase-like				36			Partial
	40	39			Partial				37			Disorganised
	41	40			Early Anaphase-like				38			Anaphase-like
	42	41			Partial				39			Anaphase-like
	43	42			Disorganised				40			Early Anaphase-like
	44	43			Early Anaphase-like				41			Disorganised
	45	44			Disorganised				42			Disorganised
	46	45			Partial				43			Anaphase-like
	47	46			Partial				44			Early Anaphase-like
	48	47			Disorganised				45			Partial
	49	48			Partial				46			Partial
	50	49			Disorganised				48			Partial
	51	50			Early Anaphase-like				49			Early Anaphase-like
	52	51			Disorganised				50			Early Anaphase-like
	53	52			Disorganised				51			Partial
	54	53			Disorganised				52			Anaphase-like
	55	54			Disorganised				53			Anaphase-like
	56	55			Disorganised				54a			Disorganised
	57	56			Partial				54b			Partial
	58	57			Partial				54c			Early Anaphase-like
	59	58			Disorganised				55			Disorganised
	60	59			Early Anaphase-like				56			Anaphase-like
	61	60			Early Anaphase-like				57			Anaphase-like
	62								58			Partial
	63								59			Disorganised
	64								60			Early Anaphase-like
	65								61			Disorganised
	66								62			Early Anaphase-like
				Disorganised	32	0.52459					Disorganised	17	0.257576
				Partial	17	0.278689					Partial	15	0.227273
				Early anaphase-like	12	0.196721					Early anaphase-like	15	0.227273
				Anaphase-like	0	0					Anaphase-like	19	0.287879
				Total	61						Total	66
					Untreated	BI2536
				Disorganised	0.52459	0.269841
				Partial	0.278689	0.238095
				Early anaphase-like	0.196721	0.238095
				Anaphase-like	0	0.301587

## Sheet: siSGO1 23-03-2024
sister chromatids separation distance (um)
			Untreated							BI2536
	Cell	Image no	-ve	RPA threads No.	SC separation feature				Image no	+ve	RPA threads no.	SC separation feature
	1	1a			Disorganised				1			Disorganised
	2	1b			Partial				2			Anaphase-like
	3	2			Partial				3			Partial
	4	3			Disorganised				4			Early Anaphase-like
	5	4			Partial				5			Disorganised
	6	5			Disorganised				6			Anaphase-like
	7	6			Disorganised				7			Early Anaphase-like
	8	7			Disorganised				8			Disorganised
	9	8			Partial				9			Disorganised
	10	9			Partial				10			Disorganised
	11	10			Partial				11			Early Anaphase-like
	12	11			Early Anaphase-like				12			Disorganised
	13	12			Partial				13			Disorganised
	14	13			Partial				14			Early Anaphase-like
	15	14			Disorganised				15			Disorganised
	16	15			Disorganised				15A			Anaphase-like
	17	16			Partial				16			Anaphase-like
	18	17a			Partial				17			Early Anaphase-like
	19	17b			Disorganised				17A			Anaphase-like
	20	18			Disorganised				18			Early Anaphase-like
	21	19			Disorganised				19			Early Anaphase-like
	22	20			Disorganised				20			Disorganised
	23	21			Disorganised				21			Disorganised
	24	22			Disorganised				22			Disorganised
	25	23			Partial				23			Disorganised
	26	24			Disorganised				24			Disorganised
	27	25			Disorganised				25			Anaphase-like
	28	26			Partial				26			Anaphase-like
	29	26A			Partial				27			Disorganised
	30	27			Disorganised				28			Disorganised
	31	28			Early Anaphase-like				29			Disorganised
	32	29			Disorganised				30			Early Anaphase-like
	33	30			Partial				31			Disorganised
	34	31			Disorganised				32			Partial
	35	32			Disorganised				33			Disorganised
	36	33			Partial				34			Partial
	37	34			Disorganised				34A			Anaphase-like
	38	35			Disorganised				35			Early Anaphase-like
	39	36			Disorganised				36a			Partial
	40	37			Disorganised				36b			Disorganised
	41	38a			Disorganised				37			Partial
	42	38b			Disorganised				38			Disorganised
	43	39			Disorganised				40			Partial
	44	40			Partial				41			Partial
	45	41			Partial				42			Anaphase-like
	46	42a			Partial				43			Disorganised
	47	42b			Disorganised				44			Disorganised
	48	42A			Disorganised				44A			Early Anaphase-like
	49	43			Disorganised				45			Anaphase-like
	50	44			Disorganised				46			Disorganised
	51	45			Disorganised				47			Early Anaphase-like
	52	46			Disorganised				48			Early Anaphase-like
	53	46A			Disorganised				49			Disorganised
	54	47			Early Anaphase-like				50			Early Anaphase-like
	55	48			Disorganised				50A			Anaphase-like
	56	49			Partial				51			Disorganised
	57	50a			Disorganised				52			Partial
	58	50A			Disorganised				53			Disorganised
	59	51			Disorganised				54			Early Anaphase-like
	60	52			Early Anaphase-like				55			Disorganised
	61	53			Partial				58			Disorganised
	62	54			Disorganised				59			Partial
	63	55A			Disorganised				60a			Disorganised
	64	56			Partial				60b			Anaphase-like
	65								61a			Disorganised
	66								61b			Anaphase-like
				Disorganised	39	0.609375					Disorganised	30	0.454545
				Partial	21	0.328125					Partial	9	0.136364
				Early anaphase-like	4	0.0625					Early anaphase-like	14	0.212121
				Anaphase-like	0	0					Anaphase-like	13	0.19697
				Total	64	1					Total	66	1
					Untreated	BI2536
				Disorganised	0.609375	0.454545
				Partial	0.328125	0.136364
				Early anaphase-like	0.0625	0.212121
				Anaphase-like	0	0.19697

## Sheet: Summary
Untreated
	Exp1	Exp2	Exp3	mean	SD
Disorganised	0.603175	0.52459	0.609375	0.579047	0.0472624
Partial	0.206349	0.278689	0.328125	0.271054	0.0612458
Early anaphase-like	0.0634921	0.196721	0.0625	0.107571	0.0772079
Anaphase-like	0.015873	0	0	0.00529101	0.00916429
BI2536
	Exp1	Exp2	Exp3	mean	SD
Disorganised	0.31746	0.269841	0.454545	0.347282	0.0958954
Partial	0.111111	0.238095	0.136364	0.161857	0.067221
Early anaphase-like	0.174603	0.238095	0.212121	0.208273	0.0319205
Anaphase-like	0.396825	0.301587	0.19697	0.298461	0.0999645
