# Supplementary material for: Centromere protection requires strict mitotic inactivation of the Bloom syndrome helicase complex
Source: Research Square preprint supplement (doi:10.21203/rs.3.rs-4420374/v1), 2024-05-30
Supplement: Supplementary file 10 [file Fig 2. deltaBLM-EGFPBLM N-term mutants_UFBs and PLK1i.xlsx]

## Sheet: Fig 2A Absolute values UFBs
	WT			∆51			∆13			N7A, N8A
	PICH	BLM		PICH	BLM		PICH	BLM		PICH	BLM
	2482	224.8		2294.5	729.8		1323.3	0		4240.3	725
	2934.2	346.7		1249.2	528.8		2424.6	439.4		3622.8	387.7
	3086.7	698		1776.2	383.7		1995.8	1812.5		7660	1790
	2918.1	449.1		691.6	0		2709.6	523.7
	3118.1	754.6		1990.5	0		1527	0		4533.6	0
	2903.9	436.5		1025.1	0		2508.3	415.2		5450	0
	2841.6	461.2		3026.3	0		573.9	0		2721	0
	1627.6	222.7		3173.9	0		717	489.8		5424.5	938.8
	1391.3	261.4					2108.7	0		4908.8	0
	550.1	42.8								5931.1	910
	1644.1	326.1		903.7	0		3152.7	0		6910.7	342.6
	1657.1	785.4		441.7	0		3744.5	0		3797.6	0
				1789.8	168.1		2854.2	1955.8		5400.9	36.4
	2467.7	1726		1381.2	215		4079.1	995.7
	878.6	680.2		1983.4	223		2718.3	1835		2536	67.7
				802	27.6		5384.1	0		2698.9	183.9
	2841.1	865.2		409.4	223.3		3138.4	1132.3		3426.1	1010.2
	1270.1	1227.4		428.3	142.7		2387.1	0		3274.3	396.6
	1956.6	27		305.6	0		2380.8	0		3359	1770.4
	1209.3	649.9		1242.5	0		1975.9	0		3395.1	2220
	2396	1175		2374.4	0					2478.5	460.8
	2282.7	1341.3		2960.6	0		0			4064.6	1272.1
	2999.6	727.6		1398.8	189.2		3311.8	0		4382.9	998.9
	3292.2	1003.9					3079.8	1661
	1667.9	0		2126.3	0		4554.6	2092.3		5705.6	322.3
	3965.5	3058.8		2655.3	79.8		3606.3	1216.8		3238.5	0
				1296.7	0		2836.9	1606.1		7078.7	141.6
	986.7	17.1		3426	460.7		3799.3	1476.7		5343.1	729.8
	3477.2	736.2		1384.8	65.6		2457.7	0		5608.7	508.4
	3014.3	660.3					1605.5	0		5951.3	0
	3156	965.9		3179.8	293.5					3167	425.7
	4545.7	1396.5		4413.9	79.9		2560.1	0		3113.9	97.4
	4171.2	1425		2593.4	0		2704.3	0		4869.2	105.9
	3186.2	1568.7		2210.2	0		4316.7	330.6		4187.6	230.2
	3738.8	1380.3		1513.7	0		3054.7	0		4628.3	410.8
	2079.2	734.1					2787.9	0		4304.2	0
	4271.4	1000.2		2646	246.1		1786.9	0		5603.4	0
	1663.5	495.8		1440.9	0		5257.5	973.9		2991.2	0
	3633.9	443.8		1270.9	0					3974.7	0
	2227.5	628.1		3030.9	271		1585.9	419.1		6595.3	0
				3940.5	524.2		2082.5	0
	2736.9	1695.1		2708.4	1012.7		1467.3	177.5		3183.9	314.7
	1326.1	855.1		2817.2	244.1		2139.1	0		2259.3	291.8
	1500.6	0		1541.9	0		1047.5	0		2266.7	241.5
	2203.3	689.6		3068.4	129.1		1188.5	0		1985.7	0
	2195.1	1423.4		1694.9	157					1802.5	0
	3284.5	2886.3					1771.3	0		632.1	0
	3787.5	2036.5		1721.6	0		2379.1	0
	4628.1	2631.5		2084.1	0		3471.3	0		2146.3	0
	2057.6	961.5		2084.9	0		2351.5	335.3		1831.6	0
	1778.1	1048.2		4441.8	0		2878.9	0		2776.5	0
	1208.4	272		3971.1	209.3		1543.6	414.5		3118.4	110.4
	4647	3104.9		3064.8	28.1		3311.9	626.2		1667	1328.9
	808.8	759.8		1733.1	63.9		2302.9	0		2222.4	0
	2266	1074.4		1282.4	0		3296.4	0		2507.4	0
	1583.1	658		1169.8	0		2068.7	643.1		2636.9	570.4
	842.4	0		3680.6	450.3					1533	0
	1255.1	0		1811.3	0		1338.2	0
							1790.8	0		2082.7	0
	1487.6	366.3		2505	0		1333.5	0		3129.5	0
	1932.9	1304.1		5169	0		2181	719.7		2709.5	0
				5953.8	166.7		2327.8	75.3		2210.7	0
	2313.5	1189.6		3092.8	0		2184.8	0		2554.3	0
	3704.9	364.7		3903.5	0		1510.3	285.2		1388.4	0
	995.3	261.2		3270.8	0		2777.3	0		1592.4	0
				1972.8	273.8		1366.3	0		2522.1	0
	1648.3	1022		2810.2	141.1					3947.2	0
	1656.4	1861.3		2887.6	0		2165.9	504.5
	2059	1735.7		1595.2	0		2318.8	1197.6		2840.6	348.2
				4189.2	101.1		2317.7	798.9		4387.7	0
	870.7	334.9					3438.5	459.3		4280.3	85.4
	1705.7	734		5421	941.8		3325.6	125.6		4047.5	38.7
	2091	1715.6		4758.2	744		4153	723.7		3095.9	0
	2042	1683.1		2109.8	477.4		2961	1331.5		1742.5	0
	1795	338.8		8014.1	974					3594.5	0
	1530.9	1080.9		2826.1	198.7		3116.8	151		4340.1	0
	2797.6	1155.7		3751	203.8		2144.6	0		1555.1	0
	2076	2433		1422.5	254.8
	1470.7	478.5					1925.3	0		7941.8	602.1
	643.7	176.1		843.6	0		1934.3	96.4		6474.1	233.6
	2229.6	3057		1590.5	0		2949.8	577.9		5618.3	372.2
	1111.5	1797.9		2229	0		3141.2	777.6		5625.6	241.6
				1041.4	0		2468.8	1092.4		7232.8	295.9
	1277.5	524.7		1263.8	117.7		5671.7	745.5		8199.2	174.8
	2384.2	2366.2		2047.9	0		2663.9	0		6744.1	0
	1944.3	2291.2		1811	0					6535.4	0
	1628	2016.1		584.5	82.1		1149.5	0		1460.3	0
	2296.1	2338.7					3366.7	0		5645.3	78
	1297.7	3049.4		2000.8	0		1881.6	2181.2
	1615.6	2996.3		2154.4	633.2		1605.7	0		2187.1	744.4
	964.8	2080.3		1535.9	0		2287.9	1080.8		2784.8	357.2
				2197.6	309.3		2014.8	0		3181.1	0
	1545.7	633.2		1310	0		2244.3	0		2231.2	0
	882.5	742.4		987.4	0					4500.7	1441
	1016.9	1068.3		589.8	0		1366.4	0		3940.2	1438.8
	1694	1215.4					2920.7	0		2622.1	180.5
	2094.8	1659.3		1268.6	0		2148.6	0		2725.9	0
	1219.5	962.2		1723.4	0		3220.4	0		3324.3	810.9
	1766.9	1955.5		1652.7	47.5		3210.9	1081.4
	1093.7	1882.2		2789.2	270.4		2271.1	1249.7		3528.1	393.3
	1267.8	2000.3		3542	72.3		3434.1	0		2741.2	179.5
	506.8	948.1		4563.3	241.8		1698.4	0		3826.6	323.5
				1954.6	0		1903.4	1303.2		5548.8	349.7
	1768.2	1477.9		796	0					6542.9	333.4
	388.3	1301.6		4205.8	57.6		4659.8	1633.2		6721.8	186.2
	1691.3	1040.4		2855.6	135.2		3010.3	1151.2		7151.2	254.7
	1970.7	1318.8					1382	0		5515.4	131.3
	1645.9	1681.5		1341.3	0		2533.4	628.2		8102.1	259.8
	1552.8	1910.3		2454.1	0		3407.3	823.9		5554.2	127.1
	1121.4	1917.5		1372.4	0		3291	952.5		7240.1	20.4
	1925.4	2554.4		1650.4	39.4		3453.2	592.9		5588.8	61.8
				1571.4	27.6					4820.3	0
				2142.3	399.7		2271.4	791.7		5603.2	122.4
	767.8	802.3		2806.6	0		1923.9	1275.3
	1057.9	696.8		2583.2	0		1980.7	0		2494.2	0
	875	890.4		2151.9	0		1421.6	0		2629.9	0
	1553	532.8		2404.9	233.2		2082	0		3185.6	295.4
	1381.2	815.7					1949	1091.8		2124.1	250.5
	2559.4	900.2		1624	0					2040.8	177.9
	1752	204.3		2811.3	0		1524	61.6		3043.6	0
				4826.8	536.4		1442.5	566.6		2237.8	0
	933.6	0		4991.2	212.6		2692.9	850.8		1670	337.9
	1548.4	0		2793	675.2		2229.5	1030.5		3353.9	337
	2659.3	303.6		2819.1	0		1441.8	81.1
	2925.1	1967.6		1194.2	0		2002.3	361.2		6129.8	59.2
	2616.7	1599.4		3415.1	170.4		2094.6	461.4		4761.3	2.4
	3030.1	608.9		3874.8	0.8					4783.6	230.7
	3678.3	1296.5					2095.3	0		4475.5	0
	2835.7	2716.3		5012.4	0		2145.8	0		5121	85.5
	4770.8	1619.4		2843.8	0		1551.7	317		3563.2	688.1
	3816.1	1506.1		2182.8	0		1431.7	183.5		4506.3	0
	2057.7	1120.1		2636.1	0		1497.5	0
				4174.5	0		2408.1	0		1101.5	124.7
	2982.4	1272		4056.2	91.9		1887	0		2502.3	1483
	2603.8	1847.8		1446.8	305.2		1981.2	0		2317.4	842.2
	3945.1	1489.7		3585.7	0
	3426.1	1808.5		1038.6	0		3292.8	375.5		1622	0
				5447.9	0		3482.6	564		1683.1	0
	2080.7	955.8					3019.7	487.8		1835.8	1075.3
	1777.3	588.2		1966.8	0		3648.7	485.6		1106.8	0
	3178.6	679.9		1612.6	0		2723.5	645.6		1983.9	21.4
	3231.6	986.1		2562.8	239.6		2103.6	79.1		1408.5	248.8
	95.4	0		1428.9	26.3		3020.7	0		1498.7	0
				3316	0		2496.4	0
	1556.9	1679.6		1617	0		907	0		2841.9	673.8
	1272.5	348.9		2366	0		3441.6	386.9		3648.8	1473.1
										2665.1	0
	2745.9	2682.8		1078.9	0		2241.4	557.5		3443.1	879
	2451.2	1731.1		4164.7	361.2		1708	339.8		3118.3	446.2
	4384.4	2352.6		3075.5	423		1940.3	297.3		4855.2	1390.6
	2533	1369.8		3974.7	0		457.6	0		2567.9	902.4
				2368.2	0
	5115.8	573.6		862.7	0		1900	0		1724.9	633.9
	5389.5	1086.1		1624.3	33.9		1922.3	0		2923.3	549.6
	6229.7	1504.8		3551.8	0		398.8	0		2602.4	68.8
	5692.7	1076.8		4744.8	656.3		1980.4	0
	4905.8	1135.2					1334.9	0		5414.3	0
	5320.8	2156.4		2861.1	125.4		1898.4	0		5966.4	0
	5771.6	1076.7		5350.3	431.9					5190.2	881.5
				5019.7	535.6		1493.9	0		7810.9	478.7
	1423	330.9		5499.1	275.6		898.7	0		4534.7	1689.4
	545.7	2146.6		5435.9	233.7		1775.4	0		6052.2	280.8
				2485.7	0		943.2	0		6222.9	139.6
	6701.8	2564.3		2532.3	0					5704.2	2.4
	6840.5	1418.6		5704.7	631.3		4114	852.5		7923.6	0
	2182.8	77.5					2010.1	87.5		5572.6	0
				343	0		3544.6	595.7		3614.5	917.3
	2897.9	1191.5		1419.8	0		3657.2	956.1		8379.9	209.7
	3249	2104.8		1011.2	290.3		2347.9	520.8
				1640.8	30.9		3510.3	705.9		4124.2	593.7
	2411.2	1502.4		1330.6	29.8		3058.2	358.9		3044.4	0
	1940.4	284.2		1011.3	351.1					3892.3	1515.3
	1273.3	993.7		615.7	208.4		5877.6	254.9		3595.8	447.1
	1125.5	470.4		1310.5	36.7		3345	0		2455.1	0
	1279.2	738.3		1249.2	391.3		3410.2	0
	2333.4	1015.5					3661.6	0		1380.8	0
	2025.4	898.5		5553.3	561.7		2937.6	0		3264.4	0
	2085.1	363.4		3500.6	101.7		3403	1150.7		3431.1	0
	2585.9	674.3		4064.2	626.2		2741.5	1290.1		2665.4	23.2
				3535.7	633.7		3780	0		4562.6	1077.2
	164.4	631.5		2214.8	1032		2709.8	0		4016	1386.7
	1573.2	645.5		3790.9	1040.3		4706.7	698.6		4312.6	253.2
	532.1	58.5		3448.1	698.3					3583.7	0
	2525.1	391.7					1454.2	0		3168.2	0
	1721.3	178.1		564.8	0		1954.1	0		2439.4	0
				1047.7	324.5		2648.9	24.4		3365.5	667.8
	3711.8	895.9		1645.7	0		2619.6	0
	5726.5	670.3		3606.3	0		2149.8	0		2435.4	0
	5114.1	593.8		3695.5	0		2428.7	1497.2		2633.6	326.4
	5011.4	492.4					2308.4	0		2551	678.3
	5208.1	625.3								2213.4	197.2
	4337.9	478.6		1527	0		5122.4	853.2		2436.8	308.6
	5312.7	567.7		1722	0		3601.1	564.7		2264.7	0
	4147.2	459.3		1915.1	0		2434.1	471.3
	4737	842.1		4187.2	0		3501.3	399.2		1972.7	0
	4058.6	590.8		1904.1	0		4586.6	258.6		1146.4	0
	4850	502		5648.1	0		4088.8	504.5		2734.4	183.7
	3159.9	1071.2					8676	1838.1		2248	0
	2972.2	933.1		954.2	1.7					1953.9	0
				2771.9	329.1		1477.2	0		1675.9	241.9
	2091.6	1744.8		3873.4	722		2124.2	230.4		1907.5	254.6
	2532.2	850.3		4546.5	192.5		2117.4	0		1809.6	0
	2133.5	1021.2		4743.2	680.8		1604.2	666.4		1752.7	0
				4475.6	451.6					2376.9	0
	1729.7	830		4208.5	933.2		2682.2	252.8		2431.5	0
	2807.3	1481.2		5914	1264.3		3213.6	0		2240	0
	2818.3	1095		4264.7	292.2		2296.2	0
	2685.4	1029.4		2786	800.3		2502.9	594.9		3957.5	746.5
	1877.5	43.6								5786.3	976.1
				1778.9	1702.3		2144.9	1606.1		6479.2	2116.2
	1544.4	1080.8		1931.7	1710.4		2082.8	1475.9		4703.3	1114.8
	2068.2	1635.2		3182.1	1991.6					4963.1	2042.8
	2876.7	1664.1		2739.7	1903.4		1703.3	0		3560.4	734.7
	4390.7	2161.9		2977.5	1920.9		1701	281.1
	1775.5	634.6		3927.8	2045.1		2570.3	0		4450.1	1468.3
				2467.2	1157.6		2768.4	86.8		3359.1	1068.4
	5934.4	2050.6		2244.6	1131.7					4706.8	1306.4
	4981.3	1747.1		2753.3	1494.9		1340.9	71.6		2311.4	1133
	7218.3	1419.2					1462.5	0		3025.5	650.4
	5930.1	368.1		980.3	0		1458.2	0		3392.8	611.7
	3662.9	1227.8		2526.7	0		1407.7	0		4230.2	987.9
	3654.9	1077.1		3275.2	362.9		937	0
	5749.8	1538.3		2000.9	589.3		1634.3	0		2856.2	420.9
	7333	1117.6		562.4	0		2646.3	0		3429.2	1021
	6288.7	2720.6		1856.7	0					4063.7	910
	2911.8	1340.1		1152	0		1647.7	0		3962.9	1615.6
	2970.9	1628		874.3	0		1711.9	0		2618.1	929.5
	2104.1	2186.4		868.5	0		1794.5	0		3022.4	2031
	2191.6	1157.2					1629.3	0		3798.9	1238.7
	4085.7	199.8		2448.2	0		1381.7	0		2934.1	1068.6
	883.6	664		4966.8	677		1994.1	260.7
				1068.2	0					4689.1	434.8
	1871.7	767.7		3159.9	271.5		2517.1	235.4		4889.8	699
	2467.3	1150.4		3715.2	0		1054	26.8		7106.9	0
	2728	973.3		623.5	57.6		2040.1	322.6		3802	0
	1266.9	793.5		7226.2	510.7		2397.9	525.2		5621.5	1148.5
	3141.1	1149					2156.3	686.2		5213.1	737.1
	1809.1	701.3		4752.5	524.6		3209.3	0		4980.2	177.7
				4057.2	601.7		2353	738.7		6939.4	195.9
	1097.8	113		1867.2	34.4					3288.6	0
	1592.8	574		2503.4	0		4182.3	71.6		3486.5	185.1
	1572.3	0		1846.5	274.6		4404.6	337.9		3845.7	476.2
	3006.9	2760.3		6241.7	760.2		4102	48.7		2073	0
	2478.4	231.6		3277.2	0		7206.2	332.7		5452	233.7
	1612	0		783	751.3		2984.7	0
							3174.2	240.9		4616.5	392.8
	1939.1	1187.9		3840.9	204.6			0		4818.6	575.9
	4416.6	3437.9		5922.5	665.7		2306.1	344.7		4348.7	144.1
	3846.3	2513		2930.4	0		2755.8	822.8		4647.4	552
	3958.6	2853.8		2375.4	0		2295.9	0		3819.7	431.6
	4678.4	3223.1		1516.7	0					2562.5	0
	5052.9	2898.2					3752.8	116.8		4668.5	802
	3932.7	1592.2		2880.1	142.3		3620.2	70.3
	4018.2	1480.4		3396.6	0		4667.3	1137.1		2445.8	0
	3216.4	854.6		2260.3	34.8		2844.7	0		4546.5	901.7
	3118.9	462.7		3433.2	173.5		3567.7	1141.9		5416.3	1366
	3128.3	778.6		3206.8	111.2		3590.8	889		3762.6	587.9
							5277.3	980		3690.6	0
	1324.1	270.8		3159.7	308.9		4387.8	1066.1		3584.6	263.9
	2667	701.7		3858	445.8		3677.6	0
	3099.6	336.7		2157.1	569.7		2743.9	397.7		1405.3	0
	3606.6	658.9		3635.4	1055.8		2767.8	40.8		916.6	0
	2840	1601		8954.3	1085.6		3329.5	0		2713.5	357.5
	1727	765.1		4360	998.3		591.2	0		3442.1	848.2
	2009.3	689.9		4051	849		3523.2	649.6		2104.1	445
	2398.1	828.1		7554.7	1276.3					3367.8	799.6
	2695.6	1210.2		5367.2	753		2180	296.7		2957	1051.4
	937.7	512.7		3842.1	304		1545.4	155.6		2938.5	0
	2518.8	973.4		3725.5	381.7					2869.5	0
	1104.8	270.2		2999	375.5		7386.1	807
	4100.4	841.8		2603	4.9		7264.5	672.3		1977.8	272.9
				1484.3	0		6673.7	588.6		1251.1	0
	2655.6	366.3		1220.5	85.7		6716.6	0		2018.2	430.9
	3486	563.6		1492.8	0		6668.1	0
	3661.9	855.5		1823.3	0		5585.6	0		1617.1	0
	2549.1	558.4		1796.5	309.2		3874.3	0		2289.3	1204.2
	2336.3	319.4		817.8	0		4041.4	8.2		2084.9	903.1
				1624.2	0		6945.5	637.4		2415.8	1235
	1397.9	1203.1					5373.8	21		2332.6	0
	1744.8	1316.9		5135.2	80.1		7029.4	598.6
	1155.4	1381.7		1599.6	0					3338.9	773
				5395.6	338.4		3063.1	0.5		3427.2	828.2
	1985.2	980.5		3883	334.9		1105.7	0		2383.8	218.1
	1279.1	925.7		5411.6	152.3		3274.6	1031.8		2289.2	867.2
				3483.2	86.5		3772.4	0
	1410.4	50.2		4479.7	336.4		3298.3	0		1475.7	0
	2132.4	1353.8		4672.2	327.7		2351	0		2003.6	0
	1513.4	397.6		4672.6	276.9		2907	9.6		3774.5	1545.1
				5450.1	489.1		1605.9	0		3768.1	748.8
	523.3	609.3		3652.1	154.3		2681.7	0		1526.7	2069.7
	638.7	1766.5		2413.5	84.3					1333.9	0
	707.5	2098.6					4143.5	834.6
	1825.7	2587.3		272.4	0		3284.1	52.8		1830	0
	979.5	1108.2		1664.5	0		3427.2	727.2		2634.2	0
	447.3	66.9		1821.7	114.9		3942.3	1413.1		2489.7	111.9
				1453.4	0					4315.4	187.3
	1123.4	613.4		1403.9	70.2		1376.2	1138.8		4007.4	0
	2207	771.7		1809.2	0					3655.7	73.3
	2638.2	789.7		2097.4	0		1164.7	1192.2		4866.3	354.3
	2502.2	390.1					1480.4	977.2
	2343.9	2379.4		4136	491.5		1538.9	1541.9		2507.4	0
	1602.3	1942.2		944	0		885	0		2378.7	214
				1313.8	195.6		1882.2	0		3174.7	918.9
	2243.8	596.1		2675.1	0		2643.4	0		4189.4	1115.6
	2161.5	1764.8		2433.1	0		1032.2	0		3176.7	0
	2792.7	1844.3		1914.2	100.3					2186.3	0
	2828.8	2301.1		2571.3	0		2546.7	0		2863.9	0
	2220.9	2388.8					1714.6	0		2630.7	0
	2331	565.9		2382.6	336		1943.3	452.4		3025.4	94.9
	2740.8	925		5305.7	138.2		2848.1	0
	1643.7	1291.1		5430.1	185.5		3696	9.8		2751.9	60.7
	1503.5	1559.2		3658.7	183					3170.2	0
	1515.7	840		4838.4	403.8		1936.6	0		5714.3	41.3
				2532.4	358.1		2078	0		4895.6	220.4
	1214.7	721.8		3299.2	148.8		1304.4	0		2142.5	55
	1112	200.2		3709.5	0		3329.8	629.6		3327.1	118.4
	2032.3	1742.9		2431.8	0		3638.5	570.6		4887.7	0
				4267.1	0		4232.7	99.1		4008.4	111.7
	2529.5	781.9		3606	73.6		2133.3	0
	1913	890.3		1895.3	76.3		3412.8	719.2		2928.2	1508.4
	4967.7	2343.7					3189.6	0		2333.4	0
	4545.7	930.6		1896.7	185.4		2339.8	397.2		2206.5	681.9
	3960.8	1416.1		2177	197.6		2895.2	0		2192	1394.4
	3303.5	1915.4		2421.2	150.4		4448.9	614.5		2083.1	204.4
	2925.1	1806.2		2154.7	62.2		2632.4	0		1859.8	0
	3129.8	720.6		3298	189.3
	4705.3	1043		1993.1	0		910	0		4973.6	335.8
	4488.7	1447.3		1922.7	524.7		892.2	0		2747.6	0
	5167.6	2434.4		1982.9	492.4		1234	7		5368.5	1316.8
	3172.6	2438.5					2004.7	0		5274.3	920.9
	3015	359.3		2523.8	0		1132.1	0		4811	1658.3
	2335.6	105.5		1534.1	0		2374.5	119.2		2951.5	0
	2644.4	759.4		3025.2	4.9		935.4	641.8		3931.1	350.9
	3611	299.8		1882.2	0		1027.8	254.5		3942.2	152.7
				2455.3	0		4156.4	732.2
	1475.7	2034.6		1427.3	0					2413.4	590.5
	1822.4	2480.5		1336	0		1503.7	0		3022.3	898.1
							962.8	0		3339.9	758.5
	1166.2	1602		2200	0		2497	0		7319.8	1884.6
	1001.5	879.5		3402.7	106.4		3005.4	0		4222	960.2
	877.8	557.3		2787.4	0		1865.8	0		4544.2	759.7
	1119.9	882.6		2572.8	0		1804.2	0
	1005.5	1678		2873.1	171.1		2406.6	323.7		1177.8	0
				2279.4	442.9		2265.1	240.3		2055	0
	1748.3	2027.5		1476.7	317.2		2546.7	535.2		2333.1	0
	1342	1436		2485.4	406.2		2539	677.9		2030.4	480.9
	1817.3	2186.6					910.4	0
	2090.6	3710.1		1092.8	115.7		1122.9	0		1137.4	0
	1674.2	3021.2		1416	88.7		2862.6	0		1141.9	58
	864.4	1818.3		1422.9	199.5					2387	471.3
				1351.9	145		2006.6	1105		1228.4	41.4
	3099.2	845.6		4013.3	260.5					1547.8	0
	3366.5	718.1		2550.3	224.8
	3673.4	466.9		2604.2	108.2
	2180.4	0		756.6	26.3
	2356.8	1038.9		1760.7	181.6
	384.2	0		3192.6	148.9
	454.5	0		4639.6	106.9
	1952.6	2142.5		5780.2	691.3
	1978.4	987.8		4720.9	239.9
	1642.1	352.7		5454.7	0
	896.1	460.1		6155	186.6
	616.8	0		6803.9	382.5
				8372.4	70.9
	2547.9	2565.8		3830.6	0
	6724.4	4583.4		3360.9	0
	3109.3	1370		5364.8	0
	2921.3	1491.4		3385.3	211.1
	92.9	0		4863.3	756.6
	1336.1	1369.8		5704.7	921.1
	4141.1	2002.5		5626	625.7
	1178.8	909.6		5424.4	375.3
	1343.5	0		5116.1	620.2
	2149.6	2369.1		4923.6	479
	1436.6	1123.4		6555.7	975.2
	697.9	1338.2
				2519.7	0
	1242.2	1123.1		2047.8	0
	1974.4	1308.1		3633.1	0
	2252.9	959.8		2308.4	0
	2132.1	561.6		3570.6	773.2
	2235.1	558.5		2873.8	484.1
	2093.9	1040.9		2934.5	601.7
	1633.5	833.2		2439.2	0
	2037.2	1383.9		4335.8	88.7
	1014.4	843.2
	228.8	939.6		2439.4	46.8
				2365.4	266.6
				3017.8	315.5
				1760.6	0
				2259.1	105.9
				3341.3	0
				3456.3	0
				1284.3	0
				1860.9	0
				1321	0
				314.3	0
				1423.2	0
				515	0
				2383.1	163.5
				3520.7	242.1
				726.6	193.5
				1144.5	195.4
				1138.6	70.7
				1645.5	55.8
				771.5	0
				1562.1	0
				4238.7	584.1
				2706.6	490.4
				1624.3	408.8
				1784.4	634.6
				1079.8	492.7
				1616.2	428.1

## Sheet: Fig 2B EGFP-BLM IP TOP3A
			GFP-BLM	TOP3A		Ratio	Normalised to WT
		GFP	50274.8	1040.84		0.020703	0.012645
		WT	11070.2	18124.8		1.63726	1
		delta51	18368.8	1868.72		0.101733	0.0621365
		delta13	15394.2	2259.77		0.146794	0.0896583
		VP	16475.8	5417		0.328785	0.200814
		NN	18219.9	2632.01		0.144458	0.0882318
		L9	13749.4	3322.43		0.241642	0.14759
		QE	14628	21697.6		1.48329	0.905961
		QL	15543.6	1306.01		0.0840224	0.051319

## Sheet: Fig 2D Q and -term BI2536_RPA 
		Exp1	Positive threads	Negative	N	Percentage		Exp2	Positive threads	Negative	N	Percentage		Exp3	Positive threads	Negative	N	Percentage		Total number of cells
		WT	35	22	57	61.4035		WT	80	45	125	64		WT	63	25	87	72.4138		269
		Q672R	0	47	47	0		Q672R	0	60	60	0		Q672R	0	75	75	0		182
		delta51	0	43	43	0		delta51	0	55	55	0		delta51	0	81	81	0		179
		delta13	0	42	42	0		delta13	0	57	57	0		delta13	0	84	84	0		183
		NN	0	45	45	0		NN	0	59	59	0		NN	0	80	80	0		184

## Sheet: Fig 2D CEN-TEL BI2536
	deltaBLM EGFP-BLM_STB-Rel_60nM BI2536_CEN-TEL
	Broken chromosomes per spread
	WT	Q672R	delta51	delta13	N7A,N8A
	8	2	0	0	0
	0	0	0	0	0
	12	0	1	2	0
	39	0	0	0	0
	22	0	0	0	2
	61	0	0	0	0
	1	0	1	0	0
	8	0	0	0	0
	9	0	0	0	0
	0	1	0	0	0
	20	0	1	0	0
	36	0	1	0	0
	7	1	0	0	0
	9	0	0	0	0
	76	0	0	0	1
	26	0	0	0	0
	13	0	0	0	0
	0	0	0	0	0
	6	0	0	0	1
	92	0	0	0	1
	2	0	2	1	0
	13	0	0	0	0
	2	0	0	2	0
	30	0	0	0	0
	21	0	0	0	0
	9	0	0	0	0
	1	3	0	0	0
	64	0	0	0	0
	7	0	0	0	0
	35	0	0	0	0
	0	1	0	0	1
	2	0	0	1	0
	17	2	0	0	0
	0	0	0	0	1
	90	0	0	0	1
	4	0	0	0	0
	2	0	1	0	0
	12	0	0	0	0
	14	0	0	0	0
	0	3	0	0	0
	33	2	0	0	0
	2	0	0	0	0
	0	0	2	0	0
	2	0	0	0	0
	12	0	0	0	0
	6	2	0	0	0
	7	0	0	0	0
	42	2	0	0	0
	4	0	0	0	0
	2	0	0	0	0
	8	0	1	0	1
	35	0	0	0	0
	24	0	0	0	0
	0	0	0	0	0
	0	2	0	0	0
	8	1	0	2	0
	4	0	2	2	0
	0	0	0	3	0
	48	0	0	0	0
	12	0	0	0	0
	32	1	0	2	0
	0	1	0	0	1
	34	0	1	0	0
	50	1	1	0	0
	0	0	0	0	0
	69	0	0	0	1
	0	1	0	0	0
	54	2	0	0	0
	0	1	0	1	0
	41	0	0	1	0
	35	0	0	0	0
	50	0	2	0	0
	19	0	0	0	0
	4	2	1	0	0
	81	0	0	0	0
	4	2	0	0	0
	61	0	0	0	0
	2	0	0	0	0
	45	0	0	0	0
	2	0		0
	72	0		0
		0		0
				0
				0

## Sheet: Raw data BLM PICH
	Exp 2020-11-03
	GFP-BLM WT										GFP-BLM delta51											GFP-BLM delta13											GFP-BLM deltaNN
	deltaBLM + GFP-BLM-WT_ICRF_GFP-PICH-CEN-83 late ana			Area	Mean	StdDev	Min	Max	Length		deltaBLM + GFP-BLM-delta51_ICRF_GFP-PICH-CEN-64 early ana.czi			Area	Mean	StdDev	Min	Max	Angle	Length		deltaBLM + GFP-BLM-delta13_ICRF_GFP-PICH-CEN-79 mid ana.czi			Area	Mean	StdDev	Min	Max	Angle	Length		deltaBLM + GFP-BLM-NN_ICRF_GFP-PICH-CEN-62 mid-ana.czi			Area	Mean	StdDev	Min	Max	Angle	Length
	Background	PICH	1	0.3	2719.6	239.9	2319.3	3255.8	4.1		Background	PICH	1	0.1	3447.6	398	2769.4	3978	-67.8	1.9		Background	PICH	1	0.2	4054	396	3225	4621.6	-146.3	2.8		Background	PICH	1	0.1	2861.5	101.2	2685.5	3022	-62.3	1.5
	Background	BLM	2	0.3	2751.5	60.8	2577.5	2923.6	4.1		Background	BLM	2	0.1	5838	277.2	5304.4	6257.4	-67.8	1.9		Background	BLM	2	0.2	14795.5	1005.5	12850.5	16008.3	-146.3	2.8		Background	BLM	2	0.1	7912.3	328.7	7369.5	8359.5	-62.3	1.5
		PICH	3	0.2	5201.6	536	3974	6708	3.2			PICH	3	0.2	5742.1	1061.1	3697	7469.7	-56.3	3.3			PICH	3	0.2	5377.3	1393.7	3354.7	7486.8	34.1	2.4				3	0.1	7101.8	1148.5	5214	9364.4	-65.3	1.8
		BLM	4	0.2	2976.3	125.3	2733	3298.4	3.2			BLM	4	0.2	6567.8	464.2	5524	7420.5	-56.3	3.3			BLM	4	0.2	12440.6	1461.5	10415	14885.6	34.1	2.4				4	0.1	8637.3	582.3	7295	9381.7	-65.3	1.8
		PICH	5	0.1	5653.8	1197	3809	7104.1	2			PICH	5	0.2	4696.8	775.3	3302	6124.4	-86.2	2.9			PICH	5	0.1	6478.6	962.1	4160	7845.7	-133.6	1.9				5	0.3	6484.3	2238.3	3318	13327	104.4	5.1
		BLM	6	0.2	3098.2	187.4	2842	3562.8	2.3			BLM	6	0.2	6366.8	363.7	5679	7007.1	-86.2	2.9			BLM	6	0.1	15234.9	1407.9	12803	17095.3	-133.6	1.9				6	0.3	8300	730.2	6767	9845	104.4	5.1
		PICH	7	0.2	5806.3	1202.7	3540.2	8322.9	3.1			PICH	7	0.1	5223.8	1546	2936	7853.8	-60.5	1.7			PICH	7	0.4	6049.8	1095.5	3559.9	8469	-141.9	6.1				7	0.1	10521.5	492.2	9371.5	11401.1	99.8	1
		BLM	8	0.2	3449.5	298.4	2726.5	3881.1	3.1			BLM	8	0.1	6221.7	348.5	5554	6638.7	-60.5	1.7			BLM	8	0.4	16608	1834.7	12753.4	19314.1	-141.9	6.1				8	0.1	9702.3	286.2	9137.5	10147.4	99.8	1
		PICH	9	0.1	5637.7	585.2	4426.5	6518.2	2.1			PICH	9	0.2	4139.2	822.4	2943.5	5356.1	-48.6	2.9			PICH	9	0.5	6763.6	1716.7	3263	9761.1	-149.5	7.2
		BLM	10	0.1	3200.6	135.7	2971.2	3541	2.1			BLM	10	0.2	5683.6	251.7	5199	6207.3	-48.6	2.9			BLM	10	0.5	15319.2	2687.1	9822.8	18543.1	-149.5	7.2		deltaBLM + GFP-BLM-NN_ICRF_GFP-PICH-CEN-61 ana-like.czi
		PICH	11	0.1	5837.7	788.1	4880.8	7716.3	2.2			PICH	11	0.2	5438.1	1341	3385.6	7542.1	-74.5	2.4			PICH	11	0.4	5581	1184.3	3704	7944.8	-138.4	5.5				1	0.2	2122.9	144.8	1815	2444.8	-120.5	2.9
		BLM	12	0.1	3506.1	192	3167	3864.6	2.2			BLM	12	0.2	5550.7	517.2	4610.3	6217.1	-74.5	2.4			BLM	12	0.4	14722.1	2413.3	9861	17473	-138.4	5.5				2	0.2	11828.8	318.3	11266.7	12361.8	-120.5	2.9
		PICH	13	0.1	5623.5	321.8	4902	6244.8	1.5			PICH	13	0.3	4472.7	774.7	3067.6	5676.6	-74.1	4.7			PICH	13	0.2	6562.3	1268.7	4128	8340.2	-145.9	2.4				3	0.1	6656.5	2084.3	4475	11276.4	163.7	1.6
		BLM	14	0.1	3188	130.6	2855.2	3365.9	1.5			BLM	14	0.3	5266.8	528	4394.9	6123.5	-74.1	4.7			BLM	14	0.2	15210.7	1713.5	12050	17006.9	-145.9	2.4				4	0.1	10740.2	591.7	9542	11544.6	163.7	1.6
		PICH	15	0.1	5561.2	426	4889	6321.2	1.5			PICH	15	0.1	6473.9	1313.2	4797	8411.9	-68.2	0.7			PICH	15	0.1	4627.9	856.2	3736.9	6548.7	27.4	2				5	0.2	7572.9	1850.4	3889	10746.2	-19.2	3
		BLM	16	0.1	3212.7	160.7	2868.5	3499.3	1.5			BLM	16	0.1	5623.3	220.1	5234	5925	-68.2	0.7			BLM	16	0.1	13617.8	1833.7	10604	16061.1	27.4	2				6	0.2	11310.3	999.8	9324	12969.8	-19.2	3
		PICH	17	0.2	4347.2	750.9	3209.1	5900.1	3.2			PICH	17	0	6621.5	837.8	5293	7533	-45	0.6			PICH	17	0.1	4771	341.1	4197.9	5502.5	-144.5	2.2				7	0.2	4843.9	1015.6	2830.8	6713.9	-16.5	3
		BLM	18	0.2	2974.2	111.6	2749.2	3156.5	3.2			BLM	18	0	5547.3	168.9	5222	5754.2	-45	0.6			BLM	18	0.1	15285.3	1120.2	13230	17395.6	-144.5	2.2				8	0.2	10993.5	777.6	9687	12105.4	-16.5	3
		PICH	19	0.1	4110.9	703	2736	4957.5	1.1														PICH	19	0.2	6162.7	933	4980.1	8081.5	-126.2	3.3				9	0.1	7547.4	1010.1	5332	9343.5	-5	1.5
		BLM	20	0.1	3012.9	188	2682.7	3259.5	1.1		deltaBLM + GFP-BLM-delta51_ICRF_GFP-PICH-CEN-63 metaphase-like.czi												BLM	20	0.2	12667.2	2039.7	10193	16408.2	-126.2	3.3				10	0.1	12767.6	675.4	11144	13562.7	-5	1.5
		PICH	21	0.3	3269.7	276.6	2658.7	3864	5.1		Background	PICH	1	0.1	4405.5	161	4157.9	4686.4	-63	1.8			PICH												11	0.2	7031.7	1190.6	4704	9570	176.1	2.9
		BLM	22	0.3	2794.3	117.7	2487	3079.4	5.1		Background	BLM	2	0.1	4999.2	70	4844	5130.3	-63	1.8			BLM												12	0.2	11575.7	602.1	10607.2	12779.8	176.1	2.9
		PICH	23	0.1	4363.7	445.4	3504.5	4921.3	0.9			PICH	3	0.2	4094.8	661.4	3235.6	5830.1	-74.1	3															13	0.2	8054	2009.5	3626	12058.5	9.6	3.5
		BLM	24	0.1	3077.6	127.7	2769.5	3230.6	0.9			BLM	4	0.2	4665	129.1	4395	4896	-74.1	3		deltaBLM + GFP-BLM-delta13_ICRF_GFP-PICH-CEN-78 early ana.czi													14	0.2	12738.8	884.4	10585	14244.8	9.6	3.5
		PICH	25	0.1	4376.7	478.5	3517	4890.4	0.8			PICH	5	0.2	5309.2	755.6	4227.8	6974.3	-64.5	2.4				1	0.4	3830.8	499.5	3096.4	4809.6	-123	6.2				15	0.1	9033.6	1728	6467.2	12571.8	-35	1.6
		BLM	26	0.1	3536.9	189.5	3184	3820.3	0.8			BLM	6	0.2	4959.6	100.2	4732.7	5186.2	-64.5	2.4				2	0.4	20495.9	1516.8	18185.9	23198.2	-123	6.2				16	0.1	12171.4	517.7	11267.1	13078.1	-35	1.6
												PICH	7	0.1	4847.2	612.2	3643.5	5853.8	-55.7	1.7				3	0.2	6983.5	1695.1	4904.2	9935.8	-122.4	2.5				17	0.3	5920.5	1018.9	3877	7711.3	3.2	4.7
	deltaBLM + GFP-BLM-WT_ICRF_GFP-PICH-CEN-82 late ana.czi											BLM	8	0.1	4894.2	117.2	4651	5116.5	-55.7	1.7				4	0.2	19477.5	907.8	17813.8	20812.8	-122.4	2.5				18	0.3	11122.6	701.9	9644	13149.5	3.2	4.7
	Background	PICH	1	0.2	2020.1	155.8	1749.2	2363.9	3.3			PICH	9	0.1	6195.3	711.1	5154.3	7362.5	113.4	1.3				5	0.1	7575.3	1565.5	5121.9	9923.7	61.3	2.1				19	0.2	7523.8	946.8	6189	9732.5	175.2	2.3
	Background	BLM	2	0.2	4113	122	3813.7	4317.3	3.3			BLM	10	0.1	5167.3	138.8	4957.5	5457.6	113.4	1.3				6	0.1	20479.5	976.5	18005.9	21566.7	61.3	2.1				20	0.2	11865.2	420.5	11192.8	12691.2	175.2	2.3
		PICH	3	0.2	4487.8	2007	2130	10883.4	3.3			PICH	11	0.1	5786.7	777.9	5009.2	7342	-80.4	1.7				7	0.1	6685	1034.6	5150.5	8769.7	60	1.6
		BLM	4	0.2	5839	1050.8	3845.5	8978.2	3.3			BLM	12	0.1	5214.2	107.3	4935	5427.1	-80.4	1.7				8	0.1	22451.7	1026.6	20515.8	24038.9	60	1.6		deltaBLM + GFP-BLM-NN_ICRF_GFP-PICH-CEN-60 early ana.czi
		PICH	5	0.2	2898.7	699.2	2030.9	4488.2	3.3			PICH	13	0.1	6388.9	684.7	4950	7325.4	-74.2	2				9	0.1	7909.9	671.6	6776.1	8929.4	37.6	1.4				1	0.2	2318.2	145.7	2064.9	2617.7	-100.5	3.7
		BLM	6	0.2	4793.2	569.8	4168.4	5991.4	3.3			BLM	14	0.1	5222.2	151.1	4976	5631.7	-74.2	2				10	0.1	21491.6	444.8	20249	22146.2	37.6	1.4				2	0.2	9610.2	866	7815	10814.2	-100.5	3.7
												PICH	15	0.1	5207.5	520.5	4369.5	6052.3	-65.6	2				11	0.2	6549.1	482.5	5599.4	7536	56.2	2.8				3	0.3	4854.2	758.7	3029	6127.6	74.3	3.8
	deltaBLM + GFP-BLM-WT_ICRF_GFP-PICH-CEN-81 mid ana.czi											BLM	16	0.1	5026.8	132.1	4827.6	5338.6	-65.6	2				12	0.2	22330.9	736.7	20976.2	23780.7	56.2	2.8				4	0.3	9677.9	599.4	8356	10400.7	74.3	3.8
	Background	PICH	1	0.2	2638.3	236.4	2239	2959.5	3.2			PICH	17	0.1	4814.9	725.6	3482.2	5656.4	-75.4	1.5				13	0.1	9214.9	763	7634.7	10202.6	50.5	1.1				5	0.1	5017.1	771.3	3696.4	6416.4	72.2	1.9
	Background	BLM	2	0.2	7366.3	299	6666.9	7807.1	3.2			BLM	18	0.1	5222.5	114.3	4936	5373	-75.4	1.5				14	0.1	20128.9	402.5	19305.2	20865.4	50.5	1.1				6	0.1	9794.1	573	8599	10526.2	72.2	1.9
		PICH	3	0.3	5479.4	759.2	4081	7172	4.6			PICH	19	0.2	4833.8	604.1	4018.9	6550.5	-63.4	2.4				15	0.1	6969.2	638.5	5136.7	7704.9	54.5	1.9				7	0.2	5744.3	746.6	4455.5	7342.3	75.5	3.6
		BLM	4	0.3	8231.5	724.9	6203	9587.8	4.6			BLM	20	0.2	5141.9	139	4822.6	5474.5	-63.4	2.4				16	0.1	21628.2	638.3	20270.1	22605.9	54.5	1.9				8	0.2	10620.4	794.3	9044.5	11814.9	75.5	3.6
		PICH	5	0.2	3908.4	382.5	3277.3	4652.9	3			PICH	21	0.1	4711.1	551.3	3959.4	5848.3	-69.1	1.5				17	0.2	6217.9	617.5	4896.6	7222.2	50.2	3				9	0.1	5592.5	1107.7	4606.9	8025.5	72	1.3
		BLM	6	0.2	8593.7	343.2	7754.5	9158.8	3			BLM	22	0.1	4875.5	84	4681.8	5039.8	-69.1	1.5				18	0.2	20072.1	1364.7	17886.3	21758	50.2	3				10	0.1	10006.8	475.9	9189	11031	72	1.3
		PICH	7	0.1	4594.9	383.2	3741	5112.4	0.9			PICH	23	0.2	5648	534.4	4698.8	6483.6	-74.7	2.8				19	0.1	6211.6	1109	4419.5	8186.4	38	2				11	0.2	5677.2	1022.6	3463.3	7668.2	-104.5	2.9
		BLM	8	0.1	7393.3	231.4	6964	7650.5	0.9			BLM	24	0.2	4433	69.5	4286.4	4555	-74.7	2.8				20	0.1	20311.1	675.5	18882.4	21548.1	38	2				12	0.2	11380.6	483.1	10328.5	12272.5	-104.5	2.9
		PICH	9	0.1	3847.6	752.8	2508.5	4961.8	1.2			PICH	25	0.2	6779.9	1366.1	5110.9	9341.2	-63.8	2.6				21	0.1	5806.7	211.7	5383.2	6216.9	42.4	1.7				13	0.2	5713.3	1189.8	3881.1	8062.5	87.4	2.9
		BLM	10	0.1	8016.2	299.9	7355.5	8544.9	1.2			BLM	26	0.2	4771	153.9	4486.6	5114.5	-63.8	2.6				22	0.1	19483.9	406.6	18647.9	20175	42.4	1.7				14	0.2	11830.2	657.5	10451	13139.5	87.4	2.9
		PICH	11	0.1	5034.3	790	3860.1	6228.6	1.7			PICH	27	0.1	7366.1	2081.7	4368.2	11025.2	-63	2.1				23	0.2	6550.8	901.8	4261.7	7806	-126	3				15	0.2	4796.7	1247.9	3013.5	6843.9	66.2	3
		BLM	12	0.1	8541.3	427.3	7882.7	9264.4	1.7			BLM	28	0.1	4820.1	136.1	4527.8	5026.5	-63	2.1				24	0.2	23876.6	1525.8	21151.2	25810.9	-126	3				16	0.2	10071	660.5	8840.2	10972.2	66.2	3
		PICH	13	0.3	4921	882.7	3262.2	6690.6	4.4			PICH	29	0.1	5804.3	812.3	5025.7	7423.9	-71.9	1.9															17	0.1	6382.8	516.3	5130	7310	95.2	1.8
		BLM	14	0.3	8707.6	539.8	7481	9381.2	4.4			BLM	30	0.1	5188.4	193.6	4783.6	5450.9	-71.9	1.9		deltaBLM + GFP-BLM-delta13_ICRF_GFP-PICH-CEN-77 early ana.czi													18	0.1	10882.3	375.4	10159.5	11455.7	95.2	1.8
		PICH	15	0.2	5637.9	512.1	4704	6622.6	3.2															1	0.2	2836	118.7	2662	3058.2	-116.2	2.3				19	0.1	6701.1	874.6	5454	8294	-76.3	1.2
		BLM	16	0.2	8093.9	320.7	7111	8756	3.2		deltaBLM + GFP-BLM-delta51_ICRF_GFP-PICH-CEN-62 early ana.czi													2	0.2	22138	1114.5	19379	23383.3	-116.2	2.3				20	0.1	10609.1	343.7	9945.5	10979.8	-76.3	1.2
		PICH	17	0.2	5930.5	757.7	4064	7436.3	3.4				1	0.1	2959.5	159.4	2597.5	3203.6	-111.8	1.8				3	0.4	6147.8	672.8	4095	7349.4	-112.4	6.2
		BLM	18	0.2	8370.2	374.2	7411.3	9062.3	3.4				2	0.1	5105	198.3	4496	5380.8	-111.8	1.8				4	0.4	20735.8	1905.6	16404.5	24558.5	-112.4	6.2		deltaBLM + GFP-BLM-NN_ICRF_GFP-PICH-CEN-58 ana-like.czi
		PICH	19	0.2	4306.2	810.7	2799.3	5986.5	3.7				3	0.1	5085.8	822.3	3637	6342.8	-120.8	2.2				5	0.3	5915.8	563.7	4441	7206.6	69.4	4.6				1	0.2	3068.3	172.6	2775.8	3401.2	-124.3	2.6
		BLM	20	0.2	7058.3	540.2	6120	8090.5	3.7				4	0.1	4793.5	285.5	4255	5158	-120.8	2.2				6	0.3	23799	2002.5	20524.5	26962.2	69.4	4.6				2	0.2	7641.7	460.2	6815.5	8389.4	-124.3	2.6
		PICH	21	0.1	6603.8	3286.6	3311.2	12704.5	1.1				5	0.2	5614.8	797.2	4090.5	7713.6	-121.6	2.5				7	0.1	7390.6	487.2	6277	8071	63.4	1.2				3	0.2	8773.9	1243.8	7146.3	11041.8	143.7	2.6
		BLM	22	0.1	10425.1	3713.8	7402.5	17517.5	1.1				6	0.2	5184.8	240	4450.5	5608.9	-121.6	2.5				8	0.1	24230.3	1417.3	21936	25999.9	63.4	1.2				4	0.2	7964	478.8	7220.1	8966.7	143.7	2.6
													7	0.1	4256.2	465.9	3425.1	5045	60.5	2				9	0.3	6442.3	935.1	4988.7	9759	61.5	4.4				5	0.1	6306.8	1175.2	4429.4	8390	106.1	2
	deltaBLM + GFP-BLM-WT_ICRF_GFP-PICH-CEN-80 early ana.czi												8	0.1	5088.5	259.7	4552.3	5578.4	60.5	2				10	0.3	23354.8	1822.3	20140.9	26037.6	61.5	4.4				6	0.1	6398.5	157.8	6077.3	6700	106.1	2
	Background	PICH	1	0.2	3353.9	262.2	2915.5	3772.7	2.8				9	0.1	6385.5	1489.4	4277	8671.5	-120.7	1				11	0.1	5672.9	305	5150	6268	56.1	2				7	0.2	10147	1558.6	6770	13734.2	128.1	2.5
	Background	BLM	2	0.2	3975.3	153.7	3706.2	4272.9	2.8				10	0.1	5565.7	167.1	5247.2	5842.3	-120.7	1				12	0.1	23744.1	748.9	22087.4	24948.7	56.1	2				8	0.2	7783.3	339	7021	8398.8	128.1	2.5
		PICH	3	0.1	4340.6	572.9	3125.5	5090.3	1.1				11	0.1	4344.3	584.1	3569.9	5242.3	-118.1	2.1				13	0.1	6635.3	702.9	5512	7913.8	78.5	1.8				9	0.1	8411.4	736.8	6589	9439.7	144.8	1.4
		BLM	4	0.1	3992.4	155.6	3663.5	4261.5	1.1				12	0.1	5170.6	284.7	4670.2	5478.9	-118.1	2.1				14	0.1	23614.7	1237.5	20844	25181.8	78.5	1.8				10	0.1	8371.5	310.8	7843	8840.3	144.8	1.4
		PICH	5	0.1	6831.1	1155.6	4203	8346.5	1.8				13	0.2	2566.7	177.4	2304.5	3086.1	-132	3.1				15	0.2	5293.7	449.5	4490.8	6025.7	64.4	2.6				11	0.1	8677	1955.5	6148.9	12675.2	125.9	1.6
		BLM	6	0.1	4711.5	391.5	4132	5398.1	1.8				14	0.2	4733.7	241.1	4256.1	5155.4	-132	3.1				16	0.2	19433.6	1464.6	16878.5	22417.5	64.4	2.6				12	0.1	8150.1	329.9	7634.9	8671	125.9	1.6
		PICH	7	0.3	6368.2	2024.6	3654.8	10905.3	4.4				15	0.1	6139.3	904	4912.8	7527	60.5	0.9				17	0.2	4441.5	420.4	3625.7	5073.6	-119.4	2.9				13	0.2	9019.6	1021.6	6757.5	11427.6	137.6	2.5
		BLM	8	0.3	4635.6	485.4	3786.3	5398.5	4.4				16	0.1	5398.5	264.6	4787	5754	60.5	0.9				18	0.2	21104.5	1271.3	19315.2	23551.7	-119.4	2.9				14	0.2	7252.5	185.5	6666	7571.5	137.6	2.5
		PICH	9	0.2	6509.9	1673.1	3965	10866.1	3.5				17	0.1	7373.4	1011.8	4866.5	8398.2	-94.3	1.3															15	0.1	6235.3	1069.7	4722.6	8031	150.3	1.3
		BLM	10	0.2	4941.2	586.8	4052.7	5732.6	3.5				18	0.1	5184.9	204.8	4936	5583.9	-94.3	1.3		deltaBLM + GFP-BLM-delta13_ICRF_GFP-PICH-CEN-76 early ana.czi													16	0.1	8067.4	132	7661.6	8273.6	150.3	1.3
		PICH	11	0.3	7899.6	937.6	5590.7	9234.8	4.4				19	0.1	5552.9	244.3	4851	5793.6	-100.2	1.3				1	0.2	2929.7	195.2	2660.4	3576	31.7	2.3				17	0.1	6182.2	576.1	5478.5	7539.5	-44.4	2.2
		BLM	12	0.3	5371.8	477.6	4402	6249.2	4.4				20	0.1	4918.3	143.4	4598.5	5089.3	-100.2	1.3				2	0.2	13594.9	256	13784	14893.5	31.7	2.3				18	0.1	7739.1	264.9	7146.3	8259	-44.4	2.2
		PICH	13	0.2	7525.1	608.7	5984	8754.9	2.7				21	0.2	5169.7	513.4	4165.5	5947.5	-118	2.3				3	0.2	5489.8	590.7	4342.2	6534.2	46.2	3.4				19	0.1	7937.5	1923.8	4510.5	10368.4	-39	0.9
		BLM	14	0.2	5400.3	186.3	5025.5	5824.1	2.7				22	0.2	4643.9	271.7	4094.8	4986.5	-118	2.3				4	0.2	11885.8	475	10464.8	12462.5	46.2	3.4				20	0.1	7747.6	540	6974.5	8725.7	-39	0.9
		PICH	15	0.1	6540.1	518.8	5616.5	7233.6	0.8				23	0.1	4473.2	265.2	3826	4901.8	-117.8	2.1				5	0.2	5634	602.2	4467.8	6626.9	60.8	3.1				21	0.1	7255.9	1501.3	5471	10789.8	145.5	2
		BLM	16	0.1	5544	309.9	4963	5967.2	0.8				24	0.1	4327.7	139.8	3999.5	4570.6	-117.8	2.1				6	0.2	13127.5	620.5	11626.5	13973.3	60.8	3.1				22	0.1	7871.9	503.1	7226.7	8839.3	145.5	2
		PICH	17	0.2	7092.7	1489.6	4274	9791.3	3.4															7	0.1	7246.4	1520.1	4865.5	9905.8	52.9	2				23	0.2	7696.6	1173	5996	10554.1	-46	2.6
		BLM	18	0.2	5355.6	639.6	4214.7	6666.5	3.4		deltaBLM + GFP-BLM-delta51_ICRF_GFP-PICH-CEN-61 early ana.czi													8	0.1	13925.5	1021.1	11985.7	15154	52.9	2				24	0.2	8052.5	487.6	7466.6	9301.2	-46	2.6
		PICH	19	0.2	5433.1	703.5	4230.3	6723.4	2.5				1	0.1	3405.1	276.5	2966.8	3749.4	-52.7	1.6				9	0.1	5984.4	418.6	5334.3	6838.5	48.4	1.6				25	0.1	7372.5	597.6	6726.1	8891	-41.8	1.7
		BLM	20	0.2	4709.4	209.2	4354.3	5153.3	2.5				2	0.1	8644.7	208.6	8286.8	9021.2	-52.7	1.6				10	0.1	13087.1	398.7	12288.5	13992.5	48.4	1.6				26	0.1	6762.6	96.3	6628.6	6978.8	-41.8	1.7
		PICH	21	0.1	7625.3	680.6	6209	8613.1	1.4				3	0.1	6051.1	640.7	4890.5	7068	-54.2	1				11	0.2	5717.6	515.8	4148.5	6570.1	-127.5	2.8				27	0.1	8671.7	974.3	7575	10703.4	-24.7	1.3
		BLM	22	0.1	4975.5	419	4244	5584.3	1.4				4	0.1	8890.8	134	8627.4	9105.2	-54.2	1				12	0.2	13529.7	468.2	12797.8	14306.7	-127.5	2.8				28	0.1	7578.5	306.6	7164.5	8130.2	-24.7	1.3
		PICH	23	0.3	5017.4	649.4	3943.2	6535.8	4.3				5	0.1	4846	1059.9	3313.3	7050.3	-43.2	2.2				13	0.2	4716.6	576.7	3851.2	5759.5	-126.3	2.7				29	0.1	6059.5	656.7	5172	7408.4	153	1.8
		BLM	24	0.3	4471.1	224.1	4133	5000.3	4.3				6	0.1	7740.1	898	6570	9235.9	-43.2	2.2				14	0.2	12279.7	343.4	11761.5	13127.3	-126.3	2.7				30	0.1	6937.8	171	6669.1	7270.7	153	1.8
		PICH	25	0.1	6987.8	744.5	5627.5	8459.7	1.9				7	0.1	4676	1414.6	3131.7	7314.3	-57.5	2.2				15	0.1	8187.2	1080.7	6549	9471.6	-133.6	0.9				31	0.1	7043	1170.3	5116.5	9572.4	-38.3	2.2
		BLM	26	0.1	4419.1	175.4	4151	4694.9	1.9				8	0.1	8124.2	645.7	6953	9009.3	-57.5	2.2				16	0.1	14568.8	311.1	13811	15022.5	-133.6	0.9				32	0.1	6593.2	211.3	6159.1	6924.7	-38.3	2.2
		PICH	27	0.1	5581.4	669.7	3852	6660.6	1.7				9	0.2	6436	730.9	5273.9	8041.2	119.9	3.7															33	0	9663.6	2208.6	6469	12530	-69.8	0.7
		BLM	28	0.1	4603.4	241.8	4037	4924	1.7				10	0.2	8915.7	602.1	7095	9708.8	119.9	3.7		deltaBLM + GFP-BLM-delta13_ICRF_GFP-PICH-CEN-75 ana-like.czi													34	0	6884.6	250.5	6492.5	7143.6	-69.8	0.7
													11	0.1	7345.6	630.9	5621	8250.7	117.6	1.7				1	0.1	2781.2	125.6	2590.8	3059.2	-28.1	1.7
	eltaBLM + GFP-BLM-WT_ICRF_GFP-PICH-CEN-79 early ana												12	0.1	9168.9	606.4	7630	10051	117.6	1.7				2	0.1	8728.8	138.8	8477.9	8942.4	-28.1	1.7		deltaBLM + GFP-BLM-NN_ICRF_GFP-PICH-CEN-57 mid ana.czi
	Background	PICH	1	0.2	2628.6	103.8	2386	2875.4	3.8				13	0.3	6113.5	958.8	4081	8001.7	-48.4	3.9				3	0.2	4367.1	468.7	3748.2	5479.3	-12.5	2.7				1	0.2	2621.2	323.2	1985	3105.2	-135.4	3.6
	Background	BLM	2	0.2	7413.3	206.8	7070.2	7916.1	3.8				14	0.3	9657.4	723.4	8180.8	11031.5	-48.4	3.9				4	0.2	9147.9	220.5	8590	9498.7	-12.5	2.7				2	0.2	7197.8	379	6526.3	7869.7	-135.4	3.6
		PICH	3	0.2	5365.5	660.7	3709	6602.7	2.6				15	0.1	6222.3	457.9	5373	7159.1	-53.5	2				5	0.1	4863.7	236.9	4389.5	5257.1	-13.8	1.6				3	0.2	5805.1	738.8	4172.5	7229	45.4	3.1
		BLM	4	0.2	9108.4	542.4	7823	9812.4	2.6				16	0.1	8888.8	274.8	8287	9339.7	-53.5	2				6	0.1	8706.2	236.9	8296	9073.8	-13.8	1.6				4	0.2	7512.5	272.5	6936.5	8067.7	45.4	3.1
		PICH	5	0.1	3954.7	460.9	3270	4736.3	1.9				17	0.2	4947	497.9	4157	5843.5	-43.5	2.6				7	0.1	4248.5	451.1	3532	4965.1	-2.9	1.3				5	0.2	4880.5	401.9	3824	5570.5	35.1	3.2
		BLM	6	0.1	8268.4	351.8	7502	8867.2	1.9				18	0.2	8614.9	239.7	8109	9099.5	-43.5	2.6				8	0.1	8906.3	176.7	8430	9182.1	-2.9	1.3				6	0.2	7489.6	290.3	6766.3	7933.2	35.1	3.2
		PICH	7	0.2	4129.2	1096.8	2609	6722.5	2.8				19	0.1	6473.5	1431.1	4123.5	8484.4	-43.5	1.7				9	0.1	4920.3	593.9	3467.5	5596.4	-19.2	1.5				7	0.2	4887.9	894	3703.3	6694.7	-140.8	3
		BLM	8	0.2	7330.3	393.3	6740.2	8128.3	2.8				20	0.1	8773.8	686.8	7471.8	9486.6	-43.5	1.7				10	0.1	8215.9	364.2	7419.5	8720.8	-19.2	1.5				8	0.2	7439.3	177.2	7008	7770.1	-140.8	3
		PICH	9	0.3	4831.9	1133.1	3070	8240.5	4				21	0.1	5100	396.2	4337	5747	-45.6	2				11	0.1	3828.7	215.4	3370.9	4125.8	-19.2	1.6				9	0.3	4606.9	1205.1	3062.3	8303.1	39.1	4.9
		BLM	10	0.3	8102.9	512.7	7151.8	8899.7	4				22	0.1	8801.7	332.3	8217	9349.6	-45.6	2				12	0.1	8045	225	7634.5	8383.8	-19.2	1.6				10	0.3	7030.3	392.3	6248.3	8022.3	39.1	4.9
		PICH	11	0.2	4823.7	872.4	2927	6450.5	2.7															13	0.1	3969.7	215	3553	4328.8	-7.4	1				11	0	4423.7	425.5	3674	4831.9	-155	0.5
		BLM	12	0.2	8836.7	405.5	7933	9319.9	2.7		deltaBLM + GFP-BLM-delta51_ICRF_GFP-PICH-CEN-60 ana-like.czi													14	0.1	8493.8	157.5	8203	8760.7	-7.4	1				12	0	7073.8	112.6	6890	7243.2	-155	0.5
		PICH	13	0.3	5913.1	994.2	3539	7989.7	4.1				1	0.2	2642.4	309.6	2264	3325	-90	2.5															13	0.2	3253.3	246.4	2553	3635.6	-144.7	2.3
		BLM	14	0.3	10299.6	523.6	8992	11218	4.1				2	0.2	5563.1	160.1	5267	5949	-90	2.5		deltaBLM + GFP-BLM-delta13_ICRF_GFP-PICH-CEN-74 meta-like.czi													14	0.2	6607.5	191.7	6130	6950	-144.7	2.3
		PICH	15	0.2	6416.1	1016	4122	8126.4	2.9				3	0.1	4364	608.2	3497.8	5638.6	-80.4	2.1				1	0.1	2885.5	69.7	2710.5	2987.2	-142	1.3
		BLM	16	0.2	9449.8	693.9	7747.2	10152.2	2.9				4	0.1	5052.1	138.2	4749.9	5247.1	-80.4	2.1				2	0.1	7857.5	286	7526.6	8417	-142	1.3		deltaBLM + GFP-BLM-NN_ICRF_GFP-PICH-CEN-56 metaphase-like.czi
		PICH	17	0.1	7256.7	566	5587	8006.3	2				5	0.2	4726.5	357	3969	5529.5	-95	3.8				3	0.2	4656.8	851.4	3243	6341.4	-128.4	2.4				1	0.2	2442.8	240.5	2091.3	2999	131.9	3.4
		BLM	18	0.1	10044.8	371.5	9244	10598.5	2				6	0.2	5441.9	172.9	5011.5	5786.8	-95	3.8				4	0.2	6698	277.6	6037.6	7090.6	-128.4	2.4				2	0.2	11530.9	691.6	10310.9	12676	131.9	3.4
		PICH	19	0.4	4686.2	1136.6	2872.8	6620.7	5.9				7	0.1	4727.3	248.9	4118	5120.9	-94.5	2.1				5	0.2	5264.6	713.5	4277.4	6866.9	-143.4	3				3	0.2	4589.1	743.6	3511.5	6205.3	39.9	2.3
		BLM	20	0.4	8374.8	961.1	6671	9876.4	5.9				8	0.1	5478	186.6	5132.1	5946.4	-94.5	2.1				6	0.2	6935	269.3	6389.5	7429.8	-143.4	3				4	0.2	10438.5	461.5	9268	11191.3	39.9	2.3
		PICH	21	0.2	4406.7	664.1	3288.1	5626.5	2.7				9	0.1	7084.2	1008	5474.8	9113.6	112.6	1.7				7	0.1	6356.8	1011.5	4386	7515.6	-144.9	2.1				5	0.2	4274.4	830.4	3124.2	5942	-130.7	3
		BLM	22	0.2	8461.5	368.5	7945.8	9267.2	2.7				10	0.1	5527.3	201.4	5225	5904.6	112.6	1.7				8	0.1	7691.7	539.4	6641	8535.4	-144.9	2.1				6	0.2	10082.4	600.6	9030.4	10921.8	-130.7	3
		PICH	23	0.5	3837	467.9	3117.7	5771.5	7.7				11	0.2	6613.5	560.1	5178.5	7415.4	-78.4	2.3				9	0.1	5237	732.9	3895.8	6289.4	-138.5	1.9				7	0.1	5219.3	472.3	4525	6266	-126.9	1.3
		BLM	24	0.5	7685.3	314.9	6911	8565.9	7.7				12	0.2	5772.4	118.3	5405.7	5945.4	-78.4	2.3				10	0.1	8192.8	275.9	7754	8593	-138.5	1.9				8	0.1	10981.3	264.6	10360	11320	-126.9	1.3
		PICH	25	0.1	7275.6	449.9	6258	7783.5	0.7				13	0.3	5707.2	1208.9	3731	7902.2	-83.2	4.1				11	0	5764.4	604.9	4739	6663.7	-129.1	0.7				9	0.1	5561.2	762.8	4056	7086.4	-124.8	1.9
		BLM	26	0.1	10518.2	161.7	10349.2	10822.9	0.7				14	0.3	5591.2	161.2	5277.3	5927.1	-83.2	4.1				12	0	7640.4	187.6	7367.7	7977	-129.1	0.7				10	0.1	11641.3	419.9	10538	12115.3	-124.8	1.9
		PICH	27	0.3	3437.4	612.8	2638.3	5070	4.4				15	0.3	4375.5	526	3354.8	5367.5	-89.6	4.7				13	0.2	4429.1	894.3	3209.2	6059.8	-134	2.6				11	0.2	4109.8	817	2560.5	5676.2	61.6	2.3
		BLM	28	0.3	8173.1	495	7357.7	9254	4.4				16	0.3	5627	198.9	5088	5932.4	-89.6	4.7				14	0.2	8272	277.1	7684.6	8766.4	-134	2.6				12	0.2	12859.8	684.1	11863.1	14092.5	61.6	2.3
		PICH	29	0.1	4894.6	800.1	3169	6167.8	2.1				17	0.2	3924.8	879.9	3012	6519.9	-98.6	2.4				15	0.1	6197.4	481.5	5375	7046.6	-128.7	1.2				13	0.1	4665.2	1294.1	2840	6739.6	-128.9	1.5
		BLM	30	0.1	8487.7	255.1	8068.9	8933.3	2.1				18	0.2	5413.2	186.2	5099.2	5839.5	-98.6	2.4				16	0.1	8483.7	290.7	8050	8920.4	-128.7	1.2				14	0.1	9819.3	482.8	9110.9	10656.7	-128.9	1.5
		PICH	31	0.4	4211.7	707.3	2356	6124.9	6.8				19	0.1	3812.2	225.2	3389.4	4184.9	-76.4	1.1				17	0	5188.4	510.1	4707.8	6080.5	-143.7	0.6				15	0.2	4950.2	716.8	3620.7	6398.1	47.8	3.2
		BLM	32	0.4	8071.3	483.2	6218	8960.3	6.8				20	0.1	5298.2	106.9	5176.8	5589.3	-76.4	1.1				18	0	7179.8	126	7004.7	7405.4	-143.7	0.6				16	0.2	11237.7	542.6	10488	12255.2	47.8	3.2
		PICH	33	0.4	3471	860.6	2556	5360.8	5.7				21	0.1	6323	864.7	5298.4	8070.1	135	1.2				19	0.1	6181.9	538.3	5383	6938.2	-126.6	1.4				17	0.1	5079.7	1156.9	3332.5	7248.5	-109.1	1.7
		BLM	34	0.4	6867.4	404.3	5880	7810	5.7				22	0.1	6013.4	149.1	5769.4	6224	135	1.2				20	0.1	7781.9	363.2	7149.9	8421.2	-126.6	1.4				18	0.1	12101.3	433.9	11366	12822.3	-109.1	1.7
		PICH	35	0.2	3883.7	689.1	2779	5551	3.5				23	0.1	4453.7	731.7	3502	5968.3	94.8	1.2				21	0.1	4954.2	598	4394	6072.3	58.6	1.6				19	0.2	3975.8	1338.6	2746.4	6792.5	54.5	2.8
		BLM	36	0.2	7015.8	542.2	6360.7	8555.4	3.5				24	0.1	4937.9	118.1	4758.8	5151	94.8	1.2				22	0.1	8500.6	364.6	7909.6	9107.9	58.6	1.6				20	0.2	10059.3	590.1	8875	11204.5	54.5	2.8
											deltaBLM + GFP-BLM-delta51_ICRF_GFP-PICH-CEN-58 metaphase-like.czi											deltaBLM + GFP-BLM-delta13_ICRF_GFP-PICH-CEN-73 early ana.czi											deltaBLM + GFP-BLM-NN_ICRF_GFP-PICH-CEN-54 metaphase-like.czi
	deltaBLM + GFP-BLM-WT_ICRF_GFP-PICH-CEN-78 late ana.czi												1	0.1	2816.5	134.6	2579.6	3070.4	-71	2				1	0.2	2041.9	84.8	1866.5	2216.2	-90	2.6				1	0.1	2283.5	88	2149.1	2454.8	58.1	1.7
	Background	PICH	1	0.3	2877.4	161.2	2558.5	3366.4	4.3				2	0.1	5693.1	143.1	5248	5880	-71	2				2	0.2	16602	738.9	14818	17705.7	-90	2.6				2	0.1	5249.8	269.1	4790.1	5670.4	58.1	1.7
	Background	BLM	2	0.3	4971.3	172.4	4508.5	5289.7	4.3				3	0.2	5321.5	1305	3484.2	7528.7	20.2	2.6				3	0.2	3380.1	467.6	2729.8	4160.3	-148.8	2.9				3	0.1	4366.2	663.3	3261	5461.5	90	1.4
		PICH	3	0.4	4365	507.7	3118	5780.6	6				4	0.2	5293.5	253	4801.1	5646	20.2	2.6				4	0.2	15291.5	469.7	14007.5	15907	-148.8	2.9				4	0.1	4749.5	89.9	4602.5	5014	90	1.4
		BLM	4	0.4	5337.6	305.2	4546	5752.6	6				5	0.1	7985.5	1887.5	4820	10245.4	14.6	1.5				5	0.2	3832.7	275.4	3332.1	4389.7	-152.4	2.5				5	0.1	5413	348.3	4451	5886.8	-104.7	1.4
		PICH	5	0.1	4810.3	745.6	3100	5915.3	1.6				6	0.1	5573.2	307.9	5154	5986	14.6	1.5				6	0.2	16580.7	477.7	15890.3	17498.6	-152.4	2.5				6	0.1	5400.3	140.9	5132.1	5649.2	-104.7	1.4
		BLM	6	0.1	6275.4	415.7	5499	6792.2	1.6				7	0.1	8770.3	1182.1	6267	10032	80.5	0.8				7	0.1	3375.4	408.1	2829.7	4409.6	37.6	2.1				7	0.1	4993	712.6	4272.5	6235	90	0.7
													8	0.1	5859.8	406.8	5192	6437.7	80.5	0.8				8	0.1	16409.5	887.4	15291.9	17748.8	37.6	2.1				8	0.1	5280.5	81.1	5165.7	5436.5	90	0.7
	deltaBLM + GFP-BLM-WT_ICRF_GFP-PICH-CEN-76 late ana.czi												9	0.1	5909.3	764.4	4462	6802.9	12.1	0.9				9	0.2	4222.9	324.4	3564	4942.7	20.8	3.3				9	0.1	4494.2	447.2	3699.4	5100.2	-104.9	1
	Background	PICH	1	0.2	2572.6	83	2362.6	2721.5	3				10	0.1	5602.5	223.6	5236	5856.5	12.1	0.9				10	0.2	17321.7	1000.3	14344.2	18435.2	20.8	3.3				10	0.1	5257.4	144	5028.6	5494.2	-104.9	1
	Background	BLM	2	0.2	9119.3	343.7	8633.7	9868.7	3				11	0.1	6720	1560.6	4349	9717	21.3	1.3				11	0.2	4369.7	424.3	3357.2	5276.9	-147.7	2.6				11	0.1	4837.8	1219.9	3144.8	7014.9	-81.9	1.6
		PICH	3	0.3	4886.1	914.2	3203.6	6382.5	4.2				12	0.1	5681.7	263.9	5159	6202	21.3	1.3				12	0.2	16677.3	1268	13750.2	18378.4	-147.7	2.6				12	0.1	5575	215.5	5015.5	6142	-81.9	1.6
		BLM	4	0.3	10308.9	961.6	8270	11788.8	4.2				13	0.1	6087.3	639.8	5096.6	7295.5	33.7	1.9				13	0.3	4226.7	596.8	3086.5	5205.1	-157.1	4.1				13	0.1	3671.9	781.4	2458	5118.6	-81.4	1.7
		PICH	5	0.2	6277.5	2327.7	3583.1	10360.8	3.3				14	0.1	5289.9	252.7	4826.6	5865.9	33.7	1.9				14	0.3	15670.1	1553.2	13049	18005.1	-157.1	4.1				14	0.1	5351.7	196.7	4938	5640.1	-81.4	1.7
		BLM	6	0.2	9484	1088.3	7980.7	11246.6	3.3				15	0.1	4789.3	510.4	3957.8	5796.2	21.4	2				15	0.1	3552.2	261.5	2988.5	4002	-152.3	2.2				15	0.2	3875.9	324	3415.5	4539.3	88.5	2.5
		PICH	7	0.2	3567.9	601.8	2479.2	4849	2.5				16	0.1	5966.9	183.8	5658.5	6287	21.4	2				16	0.1	16887.2	1000.9	14692.5	17997.8	-152.3	2.2				16	0.2	5261.6	99	5067.9	5444	88.5	2.5
		BLM	8	0.2	9380.5	962.8	7390	10370.5	2.5				17	0.1	5626.7	687.2	4841.9	6796.3	23.2	1				17	0.1	4819.2	763.4	3245	5641.8	165.4	0.8				17	0.1	4805.6	598.2	3743.5	5731.6	-108.8	1.6
													18	0.1	5834.2	118.1	5599.8	5988.3	23.2	1				18	0.1	15102.4	399	14154	15594.5	165.4	0.8				18	0.1	5485.1	181	5163	5891.5	-108.8	1.6
	deltaBLM + GFP-BLM-WT_ICRF_GFP-PICH-CEN-75 late ana.czi												19	0	5704.1	678	4742	6534.9	23.2	0.5				19	0.2	3408.2	632.8	2382.2	4971	-150.6	3.2				19	0.1	6230.7	1252.7	4225	7674.7	-99.5	0.8
	Background	PICH	1	0.3	2158.9	88.4	1929	2339.4	4.7				20	0	4917.4	128.3	4755.4	5109	23.2	0.5				20	0.2	14898.5	1026.7	13070.6	16563.6	-150.6	3.2				20	0.1	5712.9	78.6	5544.8	5815	-99.5	0.8
	Background	BLM	2	0.3	8236.6	285.4	7478.1	8771	4.7				21	0.1	4411.7	515.3	3376	5156.7	33	1.6
		PICH	3	0.5	3807.2	694.2	2782.5	5658.7	7.2				22	0.1	5499.1	208.6	4815	5744.5	33	1.6		deltaBLM + GFP-BLM-delta13_ICRF_GFP-PICH-CEN-72 ana-like.czi											deltaBLM + GFP-BLM-NN_ICRF_GFP-PICH-CEN-53 mid ana.czi
		BLM	4	0.5	9258.6	500.3	8273.7	9873.4	7.2				23	0.1	7005.7	1322	5262	9575.3	22.8	1.3				1	0.2	1941	69.3	1777	2143.3	-100.6	3.2				1	0.1	4300.4	461	3478	5180	-100.3	1.5
		PICH	5	0.3	3815.3	1244.6	2524.3	6078.1	5.2				24	0.1	5794.2	215.7	5483	6199.4	22.8	1.3				2	0.2	5272.3	219.3	4676	5635.6	-100.6	3.2				2	0.1	5893.3	366	4986.5	6347	-100.3	1.5
		BLM	6	0.3	10097.9	356.6	8739	10990.3	5.2															3	0.2	4106.9	526	2990	5054.4	-7.4	3				3	0.2	7141	686.2	5611	8510.6	78.4	2.3
		PICH	7	0.4	4217.9	867	3061	6756.4	5.7		deltaBLM + GFP-BLM-delta51_ICRF_GFP-PICH-CEN-56 early ana.czi													4	0.2	5776.8	298.9	5033.8	6379	-7.4	3				4	0.2	6241.5	304.6	5477.5	6694.9	78.4	2.3
		BLM	8	0.4	9972.3	547.4	8981.7	11421.5	5.7				1	0.1	3995	352.6	3402.2	4467.9	-73.8	1.2				5	0.2	4259.8	676.9	3408	5655	0	3.5				5	0.1	8688.1	1212.1	6486	10164.6	-106.9	0.8
													2	0.1	4222.6	120.2	4073.3	4496.2	-73.8	1.2				6	0.2	6469.9	692.3	5255	7465	0	3.5				6	0.1	5824	176.1	5475	6091.3	-106.9	0.8
	deltaBLM + GFP-BLM-WT_ICRF_GFP-PICH-CEN-74 early ana.czi												3	0.2	9416	1606.6	5267.6	12183.6	-21.2	2.6				7	0.3	4258.7	588.2	3152.2	5513	9.9	4.6				7	0.1	8580.7	2027.4	5958	12745.1	73	2.1
	Background	PICH	1	0.2	2992.9	193.6	2709.7	3425.9	2.8				4	0.2	5164.4	220.5	4711.1	5638.7	-21.2	2.6				8	0.3	6071.2	422.4	5182.4	6749.8	9.9	4.6				8	0.1	5978.7	228.6	5564.4	6469	73	2.1
	Background	BLM	2	0.2	9124.1	302.4	8506.4	9663.7	2.8				5	0.2	8753.2	1572.2	6606.1	12529.2	-37.6	2.3				9	0.1	5379.5	747.5	3919	6255.8	-14.5	2.1				9	0.1	8347.9	1908	6732.2	13276.7	107.8	1.9
		PICH	3	0.3	3863.6	588.9	2892	5216.5	3.9				6	0.2	4966.6	276.1	4527	5387	-37.6	2.3				10	0.1	5731.6	338.6	5155	6185	-14.5	2.1				10	0.1	5932	290	5325.2	6465.4	107.8	1.9
		BLM	4	0.3	9459	484.9	8404.1	10231.1	3.9				7	0.2	6104.8	877.4	4548	7626.5	-30.2	2.3				11	0.1	5266.6	615.5	4456.5	6281.2	-175.6	0.8				11	0.1	7396.3	1524.4	5817.5	11028.5	87.1	1.3
		PICH	5	0.2	4698.6	432.1	3616.9	5270.6	2.9				8	0.2	4700	153.9	4436	5022.6	-30.2	2.3				12	0.1	5397.9	355.6	4921.2	5901.7	-175.6	0.8				12	0.1	5723.9	132.9	5545.2	6015	87.1	1.3
		BLM	6	0.2	9858.1	468.1	8951	10435.8	2.9				9	0.1	12009.1	3069.6	6341.1	16153.8	-47.5	2.1				13	0.1	6094	260	5672	6557	151.4	0.8				13	0.3	6042.9	755.3	4249	8063.7	88.5	5
		PICH	7	0.3	5083.9	730	3417	6360	4.2				10	0.1	5196.6	417	4309	5857.3	-47.5	2.1				14	0.1	5996	138.7	5646	6157.2	151.4	0.8				14	0.3	5246	289	4572.1	5608	88.5	5
		BLM	8	0.3	10839.7	756.8	9135.1	12314.2	4.2				11	0.2	6821.1	431.1	6032.7	7683.9	-45.4	2.5				15	0.3	4902	806.6	3547.4	6650.8	173.4	4.5				15	0.1	7894.9	750.9	6409	8961.5	80.1	1.3
		PICH	9	0.3	5034.9	702.9	3594	7671.3	4.6				12	0.2	4421.3	112	4193.1	4696.6	-45.4	2.5				16	0.3	6603.8	694	5334.6	7771.9	173.4	4.5				16	0.1	5294.5	162.1	4939.8	5543.8	80.1	1.3
		BLM	10	0.3	10807.2	563.5	9316	12382.4	4.6				13	0.1	7746	1440.1	5649.2	10179.9	-47	1.3															17	0.1	8640.5	948.1	5965.5	9875	78.9	1.9
		PICH	11	0.3	4787.9	1061.4	3093	8236.4	4.9				14	0.1	4426.4	97.5	4176	4585.7	-47	1.3		deltaBLM + GFP-BLM-delta13_ICRF_GFP-PICH-CEN-70 mid ana.czi													18	0.1	5662	191.7	5104	5968.4	78.9	1.9
		BLM	12	0.3	9462.9	623.4	7834	10757.6	4.9				15	0.1	5417.5	750.3	4367.6	6434.7	-41.9	1.4				1	0.2	2989.2	133.3	2767	3294	180	2.8				19	0.1	5855.5	853.2	4433	7523.3	97.9	1.4
		PICH	13	0.1	4523.8	502.6	3870.8	5529.5	1.5				16	0.1	4477.4	203.8	4122	4843	-41.9	1.4				2	0.2	14034.7	389.2	13498	15034	180	2.8				20	0.1	4946.3	134.1	4683	5186.1	97.9	1.4
		BLM	14	0.1	10205	255.5	9662	10643.8	1.5															3	0.2	6106	664.7	4462	7187.6	7.8	2.9
		PICH	15	0.2	5790.5	807.3	4076	6930.5	2.2		deltaBLM + GFP-BLM-delta51_ICRF_GFP-PICH-CEN-51 early ana.czi													4	0.2	14185.7	647.6	12826	15317.2	7.8	2.9		deltaBLM + GFP-BLM-NN_ICRF_GFP-PICH-CEN-52 early ana.czi
		BLM	16	0.2	10279.8	492.9	9319.2	11014.9	2.2				1	0.1	2816.5	258.3	2338.6	3192.7	-123	2.2				5	0.1	5133.8	471.3	4159	6040.5	171.5	1.3				1	0.1	2427.2	173.6	2066	2744.8	130.4	2
		PICH	17	0.3	5068.9	1168.5	3438	8334	3.8				2	0.1	5692.7	187.6	5199.5	5926.1	-123	2.2				6	0.1	12826.4	449.3	11749	13455.8	171.5	1.3				2	0.1	4795	118.9	4459	5046.2	130.4	2
		BLM	18	0.3	11557.1	563.3	10764	12859	3.8				3	0.3	3660.1	602	2780.2	4849.1	-138.6	4.8															3	0.2	10369	2208.1	7444	14767.3	52.8	3.1
		PICH	19	0.2	4463.6	429.4	3586	5479.4	3.7				4	0.3	5123.8	383.2	4206	5820.9	-138.6	4.8		deltaBLM + GFP-BLM-delta13_ICRF_GFP-PICH-CEN-69 early ana.czi													4	0.2	5397.1	527	4454	6232.8	52.8	3.1
		BLM	20	0.2	9602.6	271.6	8851	10095.6	3.7				5	0.1	4407	283.5	3859.9	5018.5	-137.9	1.8				1	0.1	2809.9	75.2	2592.8	2918.1	-125.7	1.6				5	0.2	8901.3	1449.5	6917.9	11807.8	39.3	2.6
		PICH	21	0.1	3636.6	519.3	2784	4873	2.1				6	0.1	5296.8	319.3	4942.1	5924.9	-137.9	1.8				2	0.1	7153.4	173.6	6645.8	7427.3	-125.7	1.6				6	0.2	5028.6	312.1	4492.9	5593.4	39.3	2.6
		BLM	22	0.1	9300.2	496.7	8175	10446	2.1				7	0.1	5045.5	443.3	4297	5758	-124.4	0.7				3	0.1	4735.2	388.7	4207.9	5400.7	53.7	2.1				7	0.2	8045.5	1827.6	4940.6	11275.6	52.7	3.6
		PICH	23	0.2	5222.5	1171.4	3343	8749	3.6				8	0.1	5441.4	261.2	5082.1	5897.8	-124.4	0.7				4	0.1	6905.7	251.6	6439.3	7396.5	53.7	2.1				8	0.2	5167.2	397.2	4437.7	5825.3	52.7	3.6
		BLM	24	0.2	12181.1	478.6	11392	13309	3.6				9	0.2	3857.9	408.5	3066.4	4665.8	50.3	3.5				5	0.2	4744.2	749.3	3431.6	6165.2	-121.1	3.5				9	0.1	8052.8	747.9	6985	9547.3	-132.8	1.8
		PICH	25	0.4	4104.4	555.2	2721	4837.8	5.5				10	0.2	5601.9	222.2	5160.7	5949.2	50.3	3.5				6	0.2	7249.8	415	6338	7847.7	-121.1	3.5				10	0.1	5036.6	229.7	4580.5	5362.7	-132.8	1.8
		BLM	26	0.4	10922	715.7	9054	11751.7	5.5				11	0.2	4080.3	423.2	3448.4	5002.3	46.1	2.4				7	0.2	5759.7	933.7	3876.6	7053.9	-138.5	2.6				11	0.2	9660	1800.1	6188	11776.7	46.5	2.7
													12	0.2	5810.4	192.2	5308	6197.2	46.1	2.4				8	0.2	7731.3	823.7	6091.5	8860.5	-138.5	2.6				12	0.2	5090.9	473.9	4317.5	5926	46.5	2.7
	deltaBLM + GFP-BLM-WT_ICRF_GFP-PICH-CEN-73 mid ana.czi												13	0.1	4864.4	1082.7	3609.8	7640.6	-135.6	2				9	0.1	5951.1	355.7	5109.5	6536.3	-106.2	1				13	0.2	10626.4	1923.3	8069.8	13254.1	42.8	3.1
	Background	PICH	1	0.3	2321.9	348.6	1766	2903.9	4.1				14	0.1	5351.7	240.9	5009.9	5975.6	-135.6	2				10	0.1	7931	377.2	7464.4	8487.7	-106.2	1				14	0.2	4969.8	375.9	4491	5627.9	42.8	3.1
	Background	BLM	2	0.3	9006.2	562.9	7627.5	9919.3	4.1				15	0.1	4627.5	1077.1	3343.8	7153.3	-134.3	2				11	0.2	5278.7	916	3172	6802.6	-117.2	2.8				15	0.2	9171.3	3775.5	4955.7	17383.3	-146.1	3.2
		PICH	3	0.4	3599.4	893.6	2576.3	5708.6	5.9				16	0.1	5446.3	209.2	4931.9	5682.4	-134.3	2				12	0.2	8245.8	689.9	6601	9236.3	-117.2	2.8				16	0.2	4616.1	507.7	3858.4	5287	-146.1	3.2
		BLM	4	0.4	9530.9	941	7934.2	11391.2	5.9				17	0.1	3401	597.1	2421.5	4484	-148.1	2				13	0	8481.6	1313.2	6823	10346.1	36.3	0.6				17	0.2	8962.6	2792.5	5535.3	16263	-132.3	2.4
		PICH	5	0.1	4706.1	418.4	3995.5	5246.1	1				18	0.1	5774.8	148.8	5261	5966.3	-148.1	2				14	0	7898.9	238.8	7454.5	8191.8	36.3	0.6				18	0.2	4587.5	406.1	3986.9	5275.1	-132.3	2.4
		BLM	6	0.1	11372.4	155.7	11085.8	11657.7	1															15	0.2	5473.8	412.3	4692.4	6428.3	47.1	2.5				19	0.1	3887.5	496.7	3096	4990.4	-142.7	1.9
		PICH	7	0.2	4266.2	526.5	2733	5019.1	3.2		deltaBLM + GFP-BLM-delta51_ICRF_GFP-PICH-CEN-50 ana-like.czi													16	0.2	6858.4	421.4	5943.9	7581.2	47.1	2.5				20	0.1	4082.7	114.8	3842.9	4306.3	-142.7	1.9
		BLM	8	0.2	11297.4	475.7	10295	12107.1	3.2				1	0.1	2532.5	123.6	2260.6	2773.9	15	1.9															21	0.2	8072.5	1529.8	4776	10212.8	-131.6	3.1
		PICH	9	0.2	3949.9	411.6	2921	4501.1	2.6				2	0.1	6921.7	128.7	6609	7089.9	15	1.9		deltaBLM + GFP-BLM-delta13_ICRF_GFP-PICH-CEN-68 ana-like.czi													22	0.2	4873	405.2	4150	5517.1	-131.6	3.1
		BLM	10	0.2	11022.3	400.1	9842.4	11499.8	2.6				3	0.1	4533.3	627	3328.8	5639.7	16.3	1.4				1	0.2	1869.5	68.9	1701.3	2003.5	-111.3	2.9
		PICH	11	0.1	4618	252.4	3873	5054	1.6				4	0.1	6793.1	352.6	6292.5	7257.7	16.3	1.4				2	0.2	9493.7	287	9000.7	9936.8	-111.3	2.9		deltaBLM + GFP-BLM-NN_ICRF_GFP-PICH-CEN-51 early ana.czi
		BLM	12	0.1	11344.9	416.7	10415	11934.6	1.6				5	0	4686.9	773.8	3316	5560.5	47.1	0.6				3	0.3	3019	494.6	2243.1	4144.7	-112.2	4.6				1	0.2	1716.4	173.7	1382.2	1972.7	-132.3	2.9
		PICH	13	0.2	3619.6	355.4	2891.7	4174.2	2.7				6	0	7554.9	165.7	7247.5	7755.4	47.1	0.6				4	0.3	8877.9	1675.4	6800	11544.4	-112.2	4.6				2	0.2	11221.6	977.2	9332.4	12158.4	-132.3	2.9
		BLM	14	0.2	12055.6	314.7	11422	12656.7	2.7				7	0.1	4068.4	304.3	3336.5	4432.8	-20	0.8				5	0.1	5236.2	1726.9	2828	7589	-99.5	0.8				3	0.2	3903.5	540.1	2840	4987.4	57.5	3
		PICH	15	0.4	3937.5	521.9	2917.5	4965.5	6.6				8	0.1	6916.7	152.9	6715	7118.9	-20	0.8				6	0.1	9075.9	555.9	7798	9809	-99.5	0.8				4	0.2	11966	222.4	11424.7	12275.9	57.5	3
		BLM	16	0.4	12002.5	760.9	9807	13214.9	6.6				9	0.1	4730.1	677	3618.2	5981.7	18.2	2.1				7	0.2	3751.1	611.4	2158.9	4537.6	-103.1	2.9				5	0.2	4501.2	1223.7	2856.5	7254.5	-144.4	2.7
		PICH	17	0.3	3286.7	480.6	2620.4	4642.1	3.9				10	0.1	7231	515.7	6275.5	7969.1	18.2	2.1				8	0.2	11674.9	372.6	10967.5	12347.9	-103.1	2.9				6	0.2	11578.8	458	10263	12272.4	-144.4	2.7
		BLM	18	0.3	11086.5	679.6	9267	12141	3.9				11	0.3	3842.5	715.1	2986.3	6201.7	20.1	4.5				9	0.2	3475.2	373.4	2890.3	4356.2	-113	2.8				7	0.2	4897.5	1125.2	3514.2	6978.7	-136	2.6
													12	0.3	6575.2	471.7	5765.4	7555.2	20.1	4.5				10	0.2	9396.1	1056.3	7638	11323	-113	2.8				8	0.2	11029	593.9	10029.9	11916.7	-136	2.6
	deltaBLM + GFP-BLM-WT_ICRF_GFP-PICH-CEN-72 mid ana.czi												13	0.1	3519.9	272.6	3051.2	3796.3	31.4	0.7				11	0.1	4157.4	769.3	3017.8	5406.1	-126.9	1				9	0.2	3947.6	569.2	2959	5270.3	-144.5	3.1
	Background	PICH	1	0.3	3411.5	274.3	2715	3924.8	4.2				14	0.1	6398.7	107.7	6212	6513.4	31.4	0.7				12	0.1	10574.5	154.7	10199	10789	-126.9	1				10	0.2	10943.5	481.1	10220.2	11851.2	-144.5	3.1
	Background	BLM	2	0.3	9229.8	511.7	8233	10437.6	4.2				15	0	3122.3	328.4	2722.2	3583.4	-106.7	0.7				13	0.1	3884.3	1017.8	2201	5238	180	0.9				11	0.1	6217.1	1395.3	4387	8595.9	-134.4	2.2
		PICH	3	0.1	4957.2	701.1	3353	5946.3	1.8				16	0	6047.8	111.1	5887.8	6252.8	-106.7	0.7				14	0.1	7225.3	334.7	6652	7729	180	0.9				12	0.1	12662.6	618.2	11542.8	13825.7	-134.4	2.2
		BLM	4	0.1	9863	395.3	8897	10434.8	1.8															15	0.1	4113.8	684	2705	5196.2	-46.7	1.5				13	0.2	5656.6	1177.9	4096.7	8132.7	-143.4	2.3
		PICH	5	0.3	4294	361.9	3264	4939	4.7		deltaBLM + GFP-BLM-delta51_ICRF_GFP-PICH-CEN-49 metaphase-like.czi													16	0.1	8414.9	261.4	7958	8900	-46.7	1.5				14	0.2	12660.4	790.4	11193.2	13971.4	-143.4	2.3
		BLM	6	0.3	9972.2	305.3	9290	10617.2	4.7				1	0.2	3314.2	80.5	3156.6	3529.2	-16.4	2.3															15	0.1	4338.5	985.6	3342.4	7309	-105.4	2
		PICH	7	0.1	4428.4	396.1	3743	5409.7	1.5				2	0.2	3690.3	207.3	3304.8	4030.4	-16.4	2.3		deltaBLM + GFP-BLM-delta13_ICRF_GFP-PICH-CEN-67 meta-like.czi													16	0.1	11402.1	536.6	10510.5	12261.3	-105.4	2
		BLM	8	0.1	10298.1	186.9	9995.2	10641	1.5				3	0.1	4582.8	444.4	3497	5236.4	-16.4	1.2				1	0.5	1624.8	101.5	1449.7	1863.8	63.8	7.1				17	0.2	4442.3	1307.9	2924.7	8218.7	-121.4	2.7
		PICH	9	0.1	5105.5	353.4	4197	5489	1				4	0.1	3417.1	83.3	3265.8	3604	-16.4	1.2				2	0.5	10686.3	1016.8	8986.9	12296.6	63.8	7.1				18	0.2	10772	833.3	9899.8	12503.7	-121.4	2.7
		BLM	10	0.1	10445.2	274.1	9957	10844	1				5	0.1	5037.6	613.4	4118	5844.3	-38.2	1.2				3	0.1	2991.2	479.6	2289.1	3600.1	60.3	0.8				19	0.1	5040.7	552.2	4149	5776	-126.9	0.8
		PICH	11	0.2	5506.3	934.8	4111	7546.6	3.1				6	0.1	3356.8	76.8	3244	3473.2	-38.2	1.2				4	0.1	8553.8	321.1	8009.2	8868.9	60.3	0.8				20	0.1	12032.5	322.6	11459.2	12462.1	-126.9	0.8
		BLM	12	0.2	10889.1	838.4	9177	12112.3	3.1				7	0.2	4966.9	771.4	3502.1	6715.7	4.9	3.1				5	0	4545.5	841	3157	5524.8	-96	0.6
		PICH	13	0.1	4631	666.2	3521	6024.1	1.9				8	0.2	3737.8	113	3551	3979.8	4.9	3.1				6	0	9584.8	107.6	9389	9707.5	-96	0.6		deltaBLM + GFP-BLM-NN_ICRF_GFP-PICH-CEN-49 ana-like.czi
		BLM	14	0.1	10192	767.5	9067.6	11867.5	1.9				9	0.1	6103.4	524.4	5097	6805.7	26.6	0.9				7	0.1	3773.4	424.4	2795	4424.6	-128	1.7				1	0.1	1765	137.6	1552	1984.8	132.1	1.4
		PICH	15	0.2	5178.4	663	3963.7	6550.8	3.8				10	0.1	3960.7	97.9	3835	4234	26.6	0.9				8	0.1	9601.4	318.7	9119.8	10219.5	-128	1.7				2	0.1	4704.5	172	4344	4955.2	132.1	1.4
		BLM	16	0.2	11185.3	543.3	9858	12257.3	3.8				11	0.2	6856.2	619.4	5605	7939.8	14.8	2.3				9	0.1	4845.2	508.4	3824.5	5450.7	-114.6	0.9				3	0.3	5293.1	598.5	3891	6476.4	88.6	4
		PICH	17	0.4	4505.2	740.6	3215.1	6020	6.1				12	0.2	3762.6	139.2	3551.8	4139	14.8	2.3				10	0.1	9389.2	109.9	9188.1	9569.1	-114.6	0.9				4	0.3	5097.8	168.6	4703	5413.6	88.6	4
		BLM	18	0.4	11112	868.4	8942	12512.1	6.1				13	0.1	7877.5	1326.6	5618	9823.7	4.1	0.9				11	0.1	4835.7	710.3	3409.5	5828.8	73.4	1.9				5	0.2	4506.2	748.3	3656	6491.9	-92.4	3.1
		PICH	19	0.3	4679.3	473.4	3688	5630.4	3.9				14	0.1	3932.1	171.1	3599.9	4158.1	4.1	0.9				12	0.1	11767.7	622.8	10246.5	12592.7	73.4	1.9				6	0.2	4884	155.9	4638.2	5431.5	-92.4	3.1
		BLM	20	0.3	11230.1	618.9	10122.7	12073.7	3.9				15	0.1	5268.8	715.4	3971	6468.6	11.3	2				13	0.2	3895.9	443.6	3059.7	4917.8	72.2	2.7				7	0.1	5591.6	331.1	5024.6	6257.7	93.4	2.2
		PICH	21	0.1	3918.3	561.5	3045	5303.1	2.1				16	0.1	3533.5	76.2	3383.2	3696.9	11.3	2				14	0.2	11936	438.4	11124	12688.1	72.2	2.7				8	0.1	5028	161.2	4754.5	5363.4	93.4	2.2
		BLM	22	0.1	10177.9	898.9	9047.7	12406.1	2.1				17	0.1	4110.2	305.8	3686	4571	0	1				15	0.1	5058.9	652.8	3815	5810.3	-130	1.1				9	0.2	7313.8	553.2	5770	8341.5	75.8	3.1
													18	0.1	3608.6	94.7	3419	3735	0	1				16	0.1	9529.7	246.7	9160.9	9929.2	-130	1.1				10	0.2	5054.2	266.9	4374.5	5408.8	75.8	3.1
	deltaBLM + GFP-BLM-WT_ICRF_GFP-PICH-CEN-71 mid ana.czi												19	0.1	7520	1054.9	5873	9028	17.5	1.3				17	0.2	3323.2	314.7	2600	3911.1	-128	2.6				11	0.2	8307.9	1153.1	5567.5	9961.3	98.2	2.5
	Background	PICH	1	0.2	3261.1	379.3	2475	4013.2	3.6				20	0.1	3747.9	106.4	3595.8	3977	17.5	1.3				18	0.2	9715.4	517.2	8817	10792.7	-128	2.6				12	0.2	5037.9	261.2	4332.5	5376.5	98.2	2.5
	Background	BLM	2	0.2	6645	688.4	5109	7494.3	3.6				21	0.1	6169.8	1008.4	4843.4	7627.7	31.8	1.6				19	0.2	3528.2	1078.7	2459.5	6511.5	-118.6	2.9				13	0.2	8486.8	701.2	6881	9962.7	79.7	2.9
		PICH	3	0.3	5029.3	858.5	3804.7	7232	4.3				22	0.1	3825.5	74.3	3724.3	4011.4	31.8	1.6				20	0.2	11989.5	547.8	11209.9	13479.8	-118.6	2.9				14	0.2	4890.7	140.3	4553	5226.8	79.7	2.9
		BLM	4	0.3	8122.9	416.6	6722	8997.6	4.3																										15	0.1	8916.2	1404.7	6206	10782	-90	1.1
		PICH	5	0.1	3649.4	195.7	3133	3999.8	1.5		deltaBLM + GFP-BLM-delta51_ICRF_GFP-PICH-CEN-48 metaphase-like.czi											deltaBLM + GFP-BLM-delta13_ICRF_GFP-PICH-CEN-66 ana-like.czi													16	0.1	4959.2	135.8	4633	5169	-90	1.1
		BLM	6	0.1	7946.6	217	7431	8410.8	1.5				1	0.1	2582.9	154.8	2376.2	2981.8	-30	1.7				1	0.3	1988.4	129.4	1769	2325.4	-47.9	4.1				17	0.2	7280.4	894.5	5581	9072.9	84.9	2.6
		PICH	7	0.1	4952.4	348.2	4264	5480.9	1.3				2	0.1	4786.2	98.9	4667	4988.3	-30	1.7				2	0.3	10270	740.3	9225	11722.7	-47.9	4.1				18	0.2	4835.8	142.8	4517.3	5079.9	84.9	2.6
		BLM	8	0.1	7685.4	222.9	7108	7956.8	1.3				3	0.1	3924.2	384.9	3297.5	4586.4	-86.2	1				3	0.1	6648.2	942.3	5332	7977.7	145	0.8				19	0.2	9867.1	1410.3	7450	12614.8	-92.8	2.7
		PICH	9	0.2	5231.8	1067.7	3570.8	7567.2	3.4				4	0.1	4695.6	171.8	4402.6	4971.8	-86.2	1				4	0.1	11903.2	277.8	11385	12266.9	145	0.8				20	0.2	4964.3	166.2	4731.3	5249.4	-92.8	2.7
		BLM	10	0.2	7963.8	426.3	7197.9	8612.8	3.4				5	0.1	5037	649.8	3844	6293.2	-70.8	1.5				5	0.3	4998.7	998.4	3701	7252	120.1	4.3				21	0.1	7319.2	1056.6	6153.8	9706	-105.9	2.1
		PICH	11	0.1	4907	741.4	3699.2	6094.5	1.4				6	0.1	4493.6	119.8	4167	4718.9	-70.8	1.5				6	0.3	11421.2	691.3	10387	12966.5	120.1	4.3				22	0.1	4831.6	195.1	4539.8	5273.9	-105.9	2.1
		BLM	12	0.1	8326.5	569.5	6780	8902.4	1.4				7	0.1	3955.3	445.9	3287.6	4797.3	-82.1	2.1				7	0.2	3370.4	224.8	2729	3679	-67	2.3				23	0.2	9005.1	834.7	7349.5	10417.4	-90	2.6
		PICH	13	0.1	4813.9	777.5	3342	6120	1.2				8	0.1	4357	73.2	4201.1	4496.5	-82.1	2.1				8	0.2	9990.2	162.7	9680.3	10326.4	-67	2.3				24	0.2	4724.9	138.7	4442.4	4913.6	-90	2.6
		BLM	14	0.1	8555.3	411.8	7612	9011	1.2				9	0.1	4233.3	434.4	3245.5	5167.5	-65.6	1.9				9	0.3	4521.8	541	3309.5	5573.5	-55.8	3.9				25	0.2	7353.8	610.7	5986.3	8415.2	91.5	2.6
		PICH	15	0.2	4382.5	459	3555.2	5370.3	2.6				10	0.1	4825.6	173.5	4434.6	5156.6	-65.6	1.9				10	0.3	10898.2	533.5	9936.1	12018.8	-55.8	3.9				26	0.2	4766.3	132.7	4521.5	5005.4	91.5	2.6
		BLM	16	0.2	8562.5	612.5	6986	9495.8	2.6				11	0.1	4154.3	517.3	3307.5	4968	-72.8	1				11	0.1	5395.7	778.4	3631.5	6379.3	108.4	1.2				27	0.2	6585.3	586.2	5547	7502.6	-91.2	3.1
		PICH	17	0.2	5186.5	824.9	4208.1	7302.5	3.7				12	0.1	4813.8	201.1	4566.5	5177.3	-72.8	1				12	0.1	11093.9	786.5	9984.1	12402	108.4	1.2				28	0.2	4635.1	150.2	4310.6	4957.8	-91.2	3.1
		BLM	18	0.2	9199.4	562.6	8315	10289.4	3.7				13	0.1	4725.2	349.7	4204.6	5394.5	101.8	1.6				13	0.3	5279.4	1386.8	2556	8269.2	122.7	4.5				29	0.4	7368.2	1112.9	5931.3	10601.3	-13.5	6
													14	0.1	5185.9	214.3	4816.5	5541.8	101.8	1.6				14	0.3	11222.5	1176.7	9223.2	13377	122.7	4.5				30	0.4	4826.9	264.2	4393.4	5612.4	-13.5	6
	deltaBLM + GFP-BLM-WT_ICRF_GFP-PICH-CEN-69 mid ana.czi												15	0.1	5389.5	597	4335	6137	67.8	0.8				15	0.1	5441.6	299	4830	5940.9	115.3	0.7
	Background	PICH	1	0.3	4669.9	620.5	3276	6040.4	4.6				16	0.1	4759	132.4	4532.5	4935.2	67.8	0.8				16	0.1	10862.9	340.2	10309	11283.2	115.3	0.7		deltaBLM + GFP-BLM-NN_ICRF_GFP-PICH-CEN-48 metaphase-like.czi
	Background	BLM	2	0.3	7398.9	422.3	6484.6	8057	4.6				17	0.1	5166.1	1420.9	3624.8	7852.2	-57.9	1.7															1	0.2	1713	200	1452.1	2274	-42.3	3.5
		PICH	3	0.1	4567.7	479	3437	5455.7	2				18	0.1	4473.9	158.4	4268	4772.5	-57.9	1.7		deltaBLM + GFP-BLM-delta13_ICRF_GFP-PICH-CEN-64 meta-like.czi													2	0.2	5947.6	462.5	5175.4	6781	-42.3	3.5
		BLM	4	0.1	8219.7	442.8	7543.1	9021.9	2				19	0.1	4734.8	319.3	4190	5376.1	-81.3	1.9				1	0.5	1651.3	162.2	1357.7	2091	62.4	8.1				3	0.1	4207.2	867	3079.5	5662	-135.6	2
		PICH	5	0.2	5437.7	491.1	4348	6898.9	3.7				20	0.1	4469.6	126.9	4166.8	4665.7	-81.3	1.9				2	0.5	8268.3	1124.4	6715.5	10561.5	62.4	8.1				4	0.1	5220.3	232.6	4818.6	5664.9	-135.6	2
		BLM	6	0.2	8201.2	630.7	7013	10321.3	3.7				21	0.1	4987.8	432.4	4402.5	5745	-83.3	1.1				3	0.1	3922.7	309.4	3309.5	4463.4	105	1.9				5	0.1	4342.9	570.1	3290.1	5162.2	38	1.3
		PICH	7	0.3	5727.8	1592.7	3477.2	10852.2	4.8				22	0.1	5019.4	113.1	4806.5	5209.3	-83.3	1.1				4	0.1	9060	304.1	8369	9376.7	105	1.9				6	0.1	5264.5	279.8	4828.5	5683.8	38	1.3
		BLM	8	0.3	8095.7	906.2	6086	9822.1	4.8															5	0.2	3575.2	534.8	2636.8	4768.4	119.3	2.7				7	0.1	4898.6	788.6	3770	6838.6	-138.2	1.7
		PICH	9	0.2	5544.9	564.7	4126	6564.3	2.7		deltaBLM + GFP-BLM-delta51_ICRF_GFP-PICH-CEN-45 early ana.czi													6	0.2	9543.6	436.9	8851.8	10421.3	119.3	2.7				8	0.1	6243	139.1	6014.8	6480.2	-138.2	1.7
		BLM	10	0.2	8289.3	353.9	7501	8971.3	2.7				1	0.2	3749.2	554	2700	4727.5	-7.4	3				7	0.1	3632	462.5	2592	4275.2	-87.5	1.5				9	0.2	3837.1	676.3	2569.3	4976.8	51.3	3.6
		PICH	11	0.2	6222.9	637.9	4848.7	7468.3	2.8				2	0.2	5427.9	437.7	4458	6136	-7.4	3				8	0.1	6575.4	207.1	6215.6	6985.3	-87.5	1.5				10	0.2	6198.1	202.3	5748.4	6649.2	51.3	3.6
		BLM	12	0.2	7931.7	436.5	6826	8535.2	2.8				3	0.2	5373.2	738.3	4184.5	7106.8	-2.8	2.6				9	0.1	3072.9	265.4	2448	3530.2	-58.1	1.7				11	0.1	3753.8	940.9	2418.5	5352	-151.8	1.5
		PICH	13	0.3	6051.1	705.9	4437	7645.3	4.5				4	0.2	5304.2	359.3	4793.5	5842.7	-2.8	2.6				10	0.1	6302.5	217.4	5903.8	6675	-58.1	1.7				12	0.1	6125.5	159.2	5801	6298.8	-151.8	1.5
		BLM	14	0.3	8214.6	660.4	6977	9667.8	4.5				5	0.1	6560.5	855.1	4955	7647	170.5	1.2				11	0.1	3733.3	520.6	2631.2	4459.4	85	1.1				13	0.1	4756.6	512.4	3416.8	5472.2	-132.5	1.1
		PICH	15	0.2	7229.3	1953.8	4457.2	11158	2.6				6	0.1	4839.5	230.9	4523	5254	170.5	1.2				12	0.1	6482.9	287.5	6143.9	7251.5	85	1.1				14	0.1	5707.1	188.1	5319.5	5973.9	-132.5	1.1
		BLM	16	0.2	8299.1	593.6	7247.2	9320.2	2.6				7	0.1	8576	1296.8	5919	10837.1	-11.1	2				13	0.2	3600.3	640.5	2624.2	5151.6	118.4	3.2				15	0.1	3950.8	1011.1	2045.5	5166.6	-143.3	2.1
		PICH	17	0.2	6421.9	807	5154	8056.6	3.1				8	0.1	5964.3	414.1	4987	6442	-11.1	2				14	0.2	9360.1	462	8832.5	10390.1	118.4	3.2				16	0.1	4986	351.2	4247.5	5531.6	-143.3	2.1
		BLM	18	0.2	7603.2	546	6521	8965.5	3.1				9	0.2	8740.4	774	6903.8	9906.2	-15.4	2.3															17	0.1	3383	691.3	2232.2	4254.9	-164.5	1.2
													10	0.2	5640.5	335.8	4966.3	6118.9	-15.4	2.3		deltaBLM + GFP-BLM-delta13_ICRF_GFP-PICH-CEN-62 early ana.czi													18	0.1	6285.5	250	5766.2	6611.6	-164.5	1.2
	deltaBLM + GFP-BLM-WT_ICRF_GFP-PICH-CEN-68 early ana.czi												11	0.2	6542.2	1956	4416.7	9919.1	-15.3	2.5				1	0.3	2051.4	69.1	1903.5	2210.8	-145.8	4.7				19	0.1	5066.9	926.8	3669	7427.1	-139.3	1.8
	Background	PICH	1	0.3	3005.4	138.6	2716.4	3421	4.1				12	0.2	6103.1	510.7	5396	6878.6	-15.3	2.5				2	0.3	6552.4	237.7	5979.5	6996	-145.8	4.7				20	0.1	6284.6	142.5	5866.3	6561.3	-139.3	1.8
	Background	BLM	2	0.3	7217	344.4	6717	8327	4.1				13	0.1	6568.3	1513.2	4534	9841.7	-8.5	2.2				3	0.1	3575.4	338.2	3018.5	4135.4	-140.5	1.7
		PICH	3	0.2	3939	812.2	2659.4	5238.9	3.1				14	0.1	5022.2	455.6	4249.6	5809.5	-8.5	2.2				4	0.1	6614	193.1	6345.6	7022.2	-140.5	1.7		deltaBLM + GFP-BLM-NN_ICRF_GFP-PICH-CEN-46 metaphase-like.czi
		BLM	4	0.2	6621.2	312.4	6093	7353	3.1				15	0.1	4943.4	748.8	3569.2	5937.1	-8	1.6				5	0.1	3493.9	412.7	2761	4202.4	-146.7	1.5				1	0.1	1158.4	86.8	1659.9	1995.8	-81.6	1.1
		PICH	5	0.2	4553.8	799.9	3238	5926	2.6				16	0.1	5285.7	186.7	4738.5	5599.6	-8	1.6				6	0.1	7119	223.8	6662.8	7451.2	-146.7	1.5				2	0.1	3566.4	74.6	3448.2	3656.8	-81.6	1.1
		BLM	6	0.2	6450.6	248.6	5780	6985	2.6				17	0.1	7164.3	785.8	5327	8281.4	-9.8	1.7				7	0.1	4744.3	413.4	4039	5372.7	42.8	1.2				3	0.1	7288.2	1753.7	3517	9050.8	-160	0.8
		PICH	7	0.4	5664.7	816.6	3659.3	8259	5.4				18	0.1	5598.3	407.2	4707	6073.9	-9.8	1.7				8	0.1	7403.2	296.3	6911.6	7869	42.8	1.2				4	0.1	3625.6	136.8	3401.1	3831.8	-160	0.8
		BLM	8	0.4	7520.6	608.4	6491.6	9547	5.4				19	0.2	7624	1406	4736.8	9532	-10.5	2.8				9	0.1	4280.9	468	3299	4999.4	-141.6	1				5	0.1	5919.7	1391.5	3583	8442.2	-109.2	1.5
		PICH	9	0.2	5930.5	682.6	4714	7285	3				20	0.2	5428.7	407.5	4691.8	6137.5	-10.5	2.8				10	0.1	7582.9	258.1	6999	8017	-141.6	1				6	0.1	3568.8	132.2	3293.9	3769.8	-109.2	1.5
		BLM	10	0.2	9184.6	399.1	8557.3	10187	3															11	0.3	3493.2	297.4	2983.5	4064.8	-136.7	4.8				7	0.1	5942	587.9	4807.5	6986.8	-105	1.4
		PICH	11	0.3	5622.1	922.2	3357.5	7661.2	5.2		deltaBLM + GFP-BLM-delta51_ICRF_GFP-PICH-CEN-44 ana-like.czi													12	0.3	6633.5	520.8	5397.1	7372.5	-136.7	4.8				8	0.1	3797.1	144.3	3474	4082.8	-105	1.4
		BLM	12	0.3	8816.4	474.3	7335	9687.3	5.2				1	0.1	3379.7	102.9	3152.3	3661.6	35.3	1.9				13	0.2	4053.7	721.6	2762	5214.1	-131	2.3				9	0.1	5633.9	896.3	4117	7382.4	64.2	2.2
		PICH	13	0.3	6035.5	510	5186	7414.4	4.3				2	0.1	4546.6	179.2	4192.4	4813	35.3	1.9				14	0.2	6913.6	639.2	5746.5	7888.9	-131	2.3				10	0.1	3543.9	57.3	3424.9	3654.5	64.2	2.2
		BLM	14	0.3	7825.9	381.2	7230.7	8744.6	4.3				3	0.1	8392.1	2233.8	4878.5	11882	30.6	1.7				15	0.1	4146	219.5	3545	4521.7	-139.8	1.7				11	0.1	6279.4	620.8	4795	7285	-123.1	1.7
		PICH	15	0.3	6683.7	590.2	5411	8031.9	4.6				4	0.1	3937.3	167.3	3608.9	4220	30.6	1.7				16	0.1	7013.8	176.6	6577	7370.5	-139.8	1.7				12	0.1	3651.9	94.5	3489.5	3850.2	-123.1	1.7
		BLM	16	0.3	8513.5	491.6	7425	9380.8	4.6				5	0.2	6223.5	2567.8	3932.1	12004.7	32.5	3.5															13	0.1	4721.6	499.1	3838	5515.8	-121.9	1.4
		PICH	17	0.3	5841.1	601.5	4843	7305.4	4.8				6	0.2	3843.4	184.6	3489.3	4185.4	32.5	3.5		deltaBLM + GFP-BLM-delta13_ICRF_GFP-PICH-CEN-61 early ana.czi													14	0.1	4254.5	102.3	4067.2	4420.2	-121.9	1.4
		BLM	18	0.3	9933.3	394	9291.6	10777.4	4.8				7	0.1	5562.5	977.7	4050.5	7147.4	-138.7	2.1				1	0.5	1673.1	80.5	1497.2	1879.3	68	7.5				15	0.1	5664.7	1998.7	2738.5	8852.4	-129.5	1.7
		PICH	19	0.2	7776.2	1137.9	6618.7	10860.9	3				8	0.1	4189.6	193.5	3828.3	4519.7	-138.7	2.1				2	0.5	12891.6	1821.4	10430.5	15863.1	68	7.5				16	0.1	3469.2	209.6	3117.5	3741.4	-129.5	1.7
		BLM	20	0.2	8836.4	489.4	8204.5	10072.5	3				9	0.2	6015.8	1331.2	4052.4	8197.5	-133.1	2.8				3	0.1	3768.4	494.5	2853.4	4626.9	-118.7	2
		PICH	21	0.2	6821.5	1961.7	4434	10577.7	2.9				10	0.2	4264.6	197.9	4008.6	4665.8	-133.1	2.8				4	0.1	11240.7	448.6	10470.2	11993.6	-118.7	2		deltaBLM + GFP-BLM-NN_ICRF_GFP-PICH-CEN-44 mid ana.czi
		BLM	22	0.2	8723.1	341.4	8288.1	9669.6	2.9				11	0.1	7554.2	1181.2	5364.5	8937.1	-138	0.9				5	0.1	3818.9	372.2	2968	4285.6	-113.4	1.6				1	0.1	1649.4	179.1	1406.1	1999.4	-123.5	2.2
		PICH	23	0.2	5063.1	717.3	4180.1	6660.9	2.6				12	0.1	4385.5	104.7	4145.5	4544.4	-138	0.9				6	0.1	10792.3	469.8	9893	11646.5	-113.4	1.6				2	0.1	11256.4	189.2	10853	11580.1	-123.5	2.2
		BLM	24	0.2	8337.1	356	7876.2	9162	2.6				13	0.1	7435.9	1139	5088	9179.7	-134	1.3				7	0.2	3224.8	346.7	2690.1	3867.6	72.5	3.1				3	0.4	2750.9	533.8	1933.3	4130.4	32.8	6.2
													14	0.1	4638.5	232.6	4321.4	5103.4	-134	1.3				8	0.2	13208.6	223.4	12626.3	13580.5	72.5	3.1				4	0.4	11381.1	1153.4	8821.8	12686.4	32.8	6.2
	deltaBLM + GFP-BLM-WT_ICRF_GFP-PICH-CEN-66 late ana.czi												15	0.1	4826.5	371.5	4187.7	5439.8	-127.3	1.6				9	0.1	3104.8	154.4	2751	3326.3	76.9	1.9				5	0.1	4151.7	1147.6	2618	6241.7	-154.2	1.1
	Background	PICH	1	0.3	1845.6	131.5	1531.3	2095.8	5.1				16	0.1	4851.8	82.5	4701.6	5059.2	-127.3	1.6				10	0.1	13075.1	334.2	12499.1	13868.7	76.9	1.9				6	0.1	12739.4	832	11103	13625.4	-154.2	1.1
	Background	BLM	2	0.3	16254.2	1253.6	14406.3	18480.7	5.1				17	0.1	6965.4	1393.9	4113	9049.2	-143.4	1.4				11	0.2	3170.6	314.5	2409	3852.4	65.7	3				7	0.1	3966.8	701.4	2849.4	4683.7	-140.3	1.7
		PICH	3	0.3	4828	999.1	3286	8055.1	4.6				18	0.1	4486.6	222.1	4194.8	4848.1	-143.4	1.4				12	0.2	12450.4	538.7	10877.5	13288.5	65.7	3				8	0.1	12098.6	616.3	10704	12810.8	-140.3	1.7
		BLM	4	0.3	17526.2	661.2	16529.2	19206.1	4.6				19	0.1	4418.3	725.5	2848	5291	-86.2	1				13	0.1	4081.2	484.9	3525.5	5059	-117.3	1.1
		PICH	5	0.4	4449.4	807.4	3113.2	6520.7	5.6				20	0.1	4339.7	73.9	4208.2	4444.4	-86.2	1				14	0.1	12794.1	581.3	12094.5	13824.6	-117.3	1.1		deltaBLM + GFP-BLM-NN_ICRF_GFP-PICH-CEN-43 ana-like.czi
		BLM	6	0.4	18102	823.1	16693	19920.3	5.6				21	0	8827.6	1458.4	5920	10293.1	-62.1	0.6				15	0.1	3560.1	536.4	2796	4549.7	-122.7	1.1				1	0.2	1673.8	79.9	1445.5	1808.7	-167.7	3.2
		PICH	7	0.2	5790.7	678.5	4483.6	7353.8	3.6				22	0	4075.3	225.6	3805	4433.7	-62.1	0.6				16	0.1	12125.4	486.1	11479.1	12796.3	-122.7	1.1				2	0.2	10857	395.7	9993	11550	-167.7	3.2
		BLM	8	0.2	17743.9	727	16722	19708.3	3.6															17	0.1	3654.3	719.1	2838	5152.5	-119.5	1.1				3	0.2	3295.8	539.9	2234.3	4073.1	-175.5	2.5
		PICH	9	0.7	5271.7	1915.3	3137.9	11318.5	10.2		deltaBLM + GFP-BLM-delta51_ICRF_GFP-PICH-CEN-43 mid ana.czi													18	0.1	11505	299.7	10669	11885.6	-119.5	1.1				4	0.2	10681.9	939.4	9007.5	12014.4	-175.5	2.5
		BLM	10	0.7	18062.7	1352.1	15050	21140.3	10.2				1	0.1	4362	223.1	4001.8	4918	107.2	2															5	0.1	3356.9	620.8	2201.2	4446.3	6.2	2.1
													2	0.1	6343.3	224.2	6028.2	6899.9	107.2	2		deltaBLM + GFP-BLM-delta13_ICRF_GFP-PICH-CEN-58 metaphase-like.czi													6	0.1	10754.5	911.3	8847	11889.8	6.2	2.1
	deltaBLM + GFP-BLM-WT_ICRF_GFP-PICH-CEN-65 mid ana.czi												3	0.3	6328.8	915.7	4671	8397.1	-74.7	4.9				1	0.4	2340	115.5	2077.2	2697.7	-95.9	6.6				7	0.1	3509.6	372.7	2962.5	4419.5	13.8	1.6
	Background	PICH	1	0.2	4173.7	286	3753.1	4891.6	2.8				4	0.3	5972.3	348.8	5206	6542.2	-74.7	4.9				2	0.4	5594.4	434.9	4774	6344.6	-95.9	6.6				8	0.1	11932.3	210.4	11501	12379.2	13.8	1.6
	Background	BLM	2	0.2	7850.5	315.7	7200	8368.8	2.8				5	0.2	5974.6	1063.4	4596	8537.9	-77	2.6				3	0.2	5632.8	548.3	4773.4	7057.6	86.2	3				9	0.4	2780.6	602.4	1786.7	4410.6	10.8	5.9
		PICH	3	0.4	6254.4	959.3	4895.6	9284.4	6.5				6	0.2	6296	243.2	5773	6633.8	-77	2.6				4	0.2	5969.9	230.4	5356	6413.1	86.2	3				10	0.4	10238.8	1374.6	8119	12384.5	10.8	5.9
		BLM	4	0.4	8806.3	752.2	6836	10977.8	6.5				7	0.2	6924.8	1227.2	5277.7	9724.6	102.2	2.5				5	0.2	5822.6	901.6	4514	8312.6	82.3	2.4				11	0.1	3657.7	303.8	3141.2	4363.9	-177.4	2.1
		PICH	5	0.4	5951	1034.3	4390.1	8144.1	5.3				8	0.2	6582.9	174.7	6157	6872	102.2	2.5				6	0.2	6158.4	190.1	5728	6529.4	82.3	2.4				12	0.1	10878.4	595.2	9504	11870.4	-177.4	2.1
		BLM	6	0.4	8438.7	679.3	7218.9	10242.9	5.3				9	0.1	5790.9	1191.9	3594	8093.1	-74.9	1.8				7	0.1	5359.7	586.9	4380.9	6437.8	-68.8	1.7				13	0.1	3082.3	304.2	2663.8	3618.2	-178	1.9
		PICH	7	0.1	7352.3	1191.2	5094	9318	1.9				10	0.1	6369.6	306.8	5385	6763.8	-74.9	1.8				8	0.1	6082.2	171.2	5799.7	6313.9	-68.8	1.7				14	0.1	11105.8	557.9	9692	11822.8	-178	1.9
		BLM	8	0.1	8530.4	670.5	7163.8	9365.6	1.9				11	0.1	7678	1926.8	3940	10076.6	-55	0.8				9	0.1	5988.7	923.3	4572.8	7120.6	-117.3	1.1				15	0.1	3172.5	888.2	1717	4283.2	-140.4	1
		PICH	9	0.1	7405.3	1376.8	4748	9600.5	2.1				12	0.1	5866.3	321.8	5231	6331.8	-55	0.8				10	0.1	6080	199.3	5695	6444.9	-117.3	1.1				16	0.1	10480.1	391.9	9678	10947.8	-140.4	1
		BLM	10	0.1	8836.6	738.7	7548	10549.5	2.1				13	0.5	5979	1241.6	2956	8763.9	-71.1	7.8				11	0.1	5063.5	356.3	4171	5650.3	-106.2	1.9
		PICH	11	0.2	4269.1	822.4	3115	5880	2.4				14	0.5	5093.4	366.1	4320	5659.8	-71.1	7.8				12	0.1	6240	171.4	5983.5	6683	-106.2	1.9		deltaBLM + GFP-BLM-NN_ICRF_GFP-PICH-CEN-42 ana-like.czi
		BLM	12	0.2	6879.9	244.5	6359	7307.8	2.4				15	0.1	6728	995.7	5075	8322.6	-81.9	1.4				13	0.1	4443.6	449	3661.7	5073.8	109.8	2.2				1	0.2	1986.1	191.5	1667.5	2486	-116.6	2.3
													16	0.1	5082.3	198.9	4727.7	5479	-81.9	1.4				14	0.1	5673.5	196.1	5406.2	6161.5	109.8	2.2				2	0.2	7323.2	344	6855.5	8036.6	-116.6	2.3
	deltaBLM + GFP-BLM-WT_ICRF_GFP-PICH-CEN-63 late ana.czi																							15	0.2	5360.7	748.8	4190.8	6702.2	89.2	2.3				3	0.2	4828	1444.4	2827.9	7665	-0.6	3.2
	Background	PICH	1	0.3	2483.1	223.1	2111.1	2950.6	4.6		deltaBLM + GFP-BLM-delta51_ICRF_GFP-PICH-CEN-42 mid ana.czi													16	0.2	5540.7	449.3	4979.3	6487.5	89.2	2.3				4	0.2	7997	1096.6	6269	9715.9	-0.6	3.2
	Background	BLM	2	0.3	8106.7	368.5	7400.1	9192.2	4.6				1	0.1	3648.2	316.9	2977	4230	-65.6	1.9				17	0.1	4836.4	498.2	3507	5627	-90	1.3				5	0.2	5634.9	1005.3	3796.5	7802	0	2.3
		PICH	3	0.3	4040	805.7	3066.6	6386.2	4.4				2	0.1	4984.4	131.1	4719.5	5270.4	-65.6	1.9				18	0.1	5346.2	335.9	4729	5771	-90	1.3				6	0.2	8796.3	610.9	7552.8	9793.4	0	2.3
		BLM	4	0.3	9786.3	686.3	8252	11841.7	4.4				3	0.3	4727.1	933.1	3449	7247.5	-52.4	4.3				19	0.1	3247	220.3	2882	3669.7	-84.8	1.4				7	0.3	4651.2	692.9	3496.8	6425.6	1.2	4.8
		PICH	5	0.3	3755.6	911.6	2564.9	6228.6	4.4				4	0.3	4479.2	356.1	3807.8	5253.3	-52.4	4.3				20	0.1	5239.9	88.1	5103.5	5446.3	-84.8	1.4				8	0.3	7153.9	560.7	6094.6	8058.4	1.2	4.8
		BLM	6	0.3	8455.6	431.8	7039.7	9121.5	4.4				5	0.1	7812.9	1709.9	4361	11433	-43.7	2.1				21	0.2	5781.6	707.3	4883.8	7537.4	85.2	2.7				9	0.3	5429.2	836.7	3823.6	7227.2	1.4	3.9
													6	0.1	5345.6	374.5	4435.5	5874	-43.7	2.1				22	0.2	5981.3	179.5	5710.9	6413.6	85.2	2.7				10	0.3	8202.2	938	7107.5	10045.9	1.4	3.9
													7	0.1	6723.7	1993.7	3476	9644.7	-69.1	1.2															11	0.3	5104.4	743.1	3503.5	6314.9	4.4	3.8
	deltaBLM + GFP-BLM-WT_ICRF_GFP-PICH-CEN-61 mid ana.czi												8	0.1	5407.4	394.5	4656.5	5790.7	-69.1	1.2		deltaBLM + GFP-BLM-delta13_ICRF_GFP-PICH-CEN-57 ana-like.czi													12	0.3	7769.4	688.3	5944	8722.9	4.4	3.8
	Background	PICH	1	0.3	3628.5	570	2724.9	4495.4	4.9				9	0.2	7622.9	1600.8	4115.5	10976.6	-54.1	3.5				1	0.2	2484.8	180	2187.8	2901.7	-52	3.8				13	0.1	6841.3	1769.2	4070	9054.9	-19.8	0.9
	Background	BLM	2	0.3	8886.9	1114.2	7417.4	10755.3	4.9				10	0.2	4959	447.9	3871.7	5534.4	-54.1	3.5				2	0.2	8308.7	350.9	7529	8930	-52	3.8				14	0.1	8713.8	910.7	7090	9827.6	-19.8	0.9
		PICH	3	0.4	6374.4	1056.5	4841	9145.4	6.2				11	0.3	6016.4	1335.6	3618.2	8387.6	-58.8	4.5				3	0.2	4726.2	768.7	3774.7	7136.1	143.6	3.1				15	0.2	4554	557.5	3680.5	5779.1	8.1	3.2
		BLM	4	0.4	11569.7	910.3	10166	13765.1	6.2				12	0.3	4589.9	482.2	3646.2	5414	-58.8	4.5				4	0.2	8866.2	215.6	8551	9488.8	143.6	3.1				16	0.2	8225.6	891.4	6156	9342.6	8.1	3.2
		PICH	5	0.4	6079.7	1038.5	4747.6	8454.9	5.4				13	0.3	4510.9	1009.6	2737	6919.1	-57.8	4.6				5	0.2	4192.8	439.4	3337	5008.9	-49.3	3.1
		BLM	6	0.4	10618	928.9	8788	12317	5.4				14	0.3	4724.5	445.3	3987	5669.5	-57.8	4.6				6	0.2	8648.5	142.6	8262	9015.5	-49.3	3.1		deltaBLM + GFP-BLM-NN_ICRF_GFP-PICH-CEN-41 mid ana.czi
		PICH	7	0.1	8012.9	1035	6365	10125.5	1.6				15	0.2	5272.5	858.3	3647	6697.9	120	2.4				7	0.1	4425.1	393.5	3601	4928.7	111	0.9				1	0.1	1712.1	58.5	1566	1801.6	-98.7	2.1
		BLM	8	0.1	11239.5	581.7	10130	12249.2	1.6				16	0.2	5018.3	484.4	4101	5606.3	120	2.4				8	0.1	8606	235	8055	8860.8	111	0.9				2	0.1	9400.1	473.1	8575.6	10185.9	-98.7	2.1
		PICH	9	0.1	6161.5	509.9	5079	7285.5	1.8				17	0.3	7200	1889	3651	11008	-55.3	4				9	0.2	2942.4	333.8	2460.2	3677.2	-59.3	2.4				3	0.1	3437	332.1	2594	4084	90	1.4
		BLM	10	0.1	10256.7	529.6	9095	11408.2	1.8				18	0.3	4861.2	511.7	3706.5	5487.3	-55.3	4				10	0.2	7376.7	236.2	7056.8	7797.1	-59.3	2.4				4	0.1	10034	438.6	9049	10673	90	1.4
													19	0.1	8393	1147.6	6126	10981.3	-51.3	1.9															5	0.1	4635.4	1483.8	2141.5	6816.9	-96.1	1.5
	deltaBLM + GFP-BLM-WT_ICRF_GFP-PICH-CEN-60 mid ana.czi												20	0.1	5640.7	257.2	5122.8	6049.3	-51.3	1.9		deltaBLM + GFP-BLM-delta13_ICRF_GFP-PICH-CEN-56 early ana.czi													6	0.1	9949.7	843.4	8829	11358.8	-96.1	1.5
	Background	PICH	1	0.1	2860.6	72.6	2731.2	2977.9	2.1															1	0.2	3507.8	271.9	2837	3943.6	122.6	2.8				7	0.1	4314.5	720.3	2516.5	5328	-83.5	1.1
	Background	BLM	2	0.1	13965.4	393.2	12942	14501	2.1		deltaBLM + GFP-BLM-delta51_ICRF_GFP-PICH-CEN-41 early ana.czi													2	0.2	25205.9	2269.2	19720.2	28005.6	122.6	2.8				8	0.1	9468.9	444.7	8374	9962.3	-83.5	1.1
		PICH	3	0.2	5115.8	730.7	3467	6286.3	3.7				1	0.1	6658	689.4	5405	7671.8	-73.9	1.3				3	0.2	5407.8	392.4	4435.5	5943.5	-63.8	2.6
		BLM	4	0.2	14539	750.6	12439	15995	3.7				2	0.1	4709	68.3	4590.5	4866	-73.9	1.3				4	0.2	24953.3	1092.1	23469.6	27068	-63.8	2.6		deltaBLM + GFP-BLM-NN_ICRF_GFP-PICH-CEN-40 metaphase-like.czi
		PICH	5	0.2	5389.5	439.7	4805.6	6392	2.9				3	0.2	9519.1	2060	5538.8	13448	98.3	3.6				5	0.2	5430.1	833.9	3906.2	7018.7	-59.4	2.7				1	0.2	1435.5	62	1994.8	2244.5	-31.3	2.8
		BLM	6	0.2	15051.5	675.7	13120	16120.7	2.9				4	0.2	4834.4	403.7	4093.2	5430.9	98.3	3.6				6	0.2	24630.1	891.5	23590	26892.4	-59.4	2.7				2	0.2	12944.6	376.2	12018	13407.2	-31.3	2.8
		PICH	8	0.1	6229.7	405.1	5323	6686.9	2.1				5	0.2	12008.3	3125	6590.2	17284.3	90.5	3.7				7	0.2	3906.6	363.4	3477	5441.5	110.4	2.7				3	0.1	6849.8	1118.5	5181	8982.7	-145	1.6
		BLM	9	0.1	15470.2	756.7	14163	16688.1	2.1				6	0.2	5140.9	552.7	4222	5930.7	90.5	3.7				8	0.2	22008.2	1507	20284.4	25531	110.4	2.7				4	0.1	11471.9	317.9	10729	12030.3	-145	1.6
		PICH	10	0.1	5692.7	665.6	4380.8	6406.5	1				7	0.3	11677.7	3364.9	6010	17078.5	98.2	3.9				9	0.1	5488.2	680.2	4430.7	6970	113.2	2.2				5	0.2	7401.9	1333.2	5611.6	10600.5	-146.9	2.7
		BLM	11	0.1	15042.2	259.4	14589.5	15460.8	1				8	0.3	5244.6	731.9	3762	6299.6	98.2	3.9				10	0.1	24396.1	1731.6	22094	26826.6	113.2	2.2				6	0.2	12715.8	399.9	12093	13727.1	-146.9	2.7
		PICH	12	0.1	4905.8	422.9	4307.9	5760.4	1.9				9	0.2	12157.1	2529.2	7046	16809.4	88.5	2.4				11	0.2	4842.7	1112.2	3367.8	6898.5	-80	3				7	0.2	6625.7	1375.7	4608.9	9177.1	-147.8	3.4
		BLM	13	0.1	15100.6	255.8	14586	15607.5	1.9				10	0.2	4984.6	339.4	4119.5	5397	88.5	2.4				12	0.2	24212.2	1568.3	22171.5	26812.1	-80	3				8	0.2	13826.1	822.9	12352.7	14832.1	-147.8	3.4
		PICH	14	0.1	5320.8	236	4899.7	5643.8	1.2				11	0.2	12093.9	2092.3	8803.4	15073.7	98.1	3				13	0.1	5406.2	704.7	4023.5	6729.1	119	1.7				9	0.2	9246.4	1092.2	7677	11462.5	-147.4	2.8
		BLM	15	0.1	16121.8	259.8	15568	16546.7	1.2				12	0.2	4942.7	385.9	4306	5617.2	98.1	3				14	0.1	24484.2	1660.6	22129.3	26862	119	1.7				10	0.2	13423.3	594.1	12338.8	14376.8	-147.4	2.8
		PICH	16	0.2	5771.6	339.7	4980	6462.6	3.1				13	0.3	9143.7	2615.4	4562	13753.1	99.3	4.6															11	0.3	5970.2	1286.1	4061	8302.9	-146.9	4.9
		BLM	17	0.2	15042.1	727.7	13480	16079.7	3.1				14	0.3	4541.8	469.6	3632.9	5343.2	99.3	4.6		deltaBLM + GFP-BLM-delta13_ICRF_GFP-PICH-CEN-55 late ana.czi													12	0.3	14634	708.4	13452.4	15810.4	-146.9	4.9
													15	0.2	9190.3	1934.7	5151.5	11885.8	-78.1	3.2				1	0.1	2824.8	151.7	2534.8	3092	120.5	2.1				13	0.2	7487.7	1458.1	4981.8	10538.3	28.5	3
													16	0.2	4561.8	549.8	3670.8	5442.9	-78.1	3.2				2	0.1	23049.7	326.5	22380	23716	120.5	2.1				14	0.2	13225.4	438.7	12201.8	13834.2	28.5	3
	deltaBLM + GFP-BLM-WT_ICRF_GFP-PICH-CEN-58 late ana.czi												17	0.2	12362.7	3216.8	7174.5	17272.1	95	3.4				3	0.2	4318.7	587.4	3531.3	5920.7	121.7	2.9				15	0.2	7658.4	877	5922	8800.7	-160.9	2.6
	Background	PICH	1	0.2	2107.4	108	1852.8	2466	3.5				18	0.2	5340.3	607.3	4174.5	6314.9	95	3.4				4	0.2	22542.5	2407.5	18013.5	25084.1	121.7	2.9				16	0.2	13084.2	287.9	12488.7	13643	-160.9	2.6
	Background	BLM	2	0.2	10463.3	488.4	9513	11760.1	3.5															5	0.2	3723.5	669	2857.8	5273.8	127.6	2.9				17	0.2	7139.7	743.2	6033	8903.9	-148.1	2.8
		PICH	3	0.2	3530.4	551.6	2609.3	4950.7	3.4		deltaBLM + GFP-BLM-delta51_ICRF_GFP-PICH-CEN-40 metaphase-like.czi													6	0.2	22717.8	1071.3	20005.5	24240.1	127.6	2.9				18	0.2	12947	130.3	12552	13165.4	-148.1	2.8
		BLM	4	0.2	10794.2	353.7	10247.5	11702.8	3.4				1	0.2	1914.2	79	1658.2	2066.6	-57.6	2.7				7	0.1	4600.2	399.5	3982.8	5291.6	-74.3	1.1						9359.1
		PICH	5	0.1	2653.1	312.1	2094.5	3021.8	1.2				2	0.2	2630.5	70.7	2485.5	2820	-57.6	2.7				8	0.1	19273.1	1305.5	16442	20799.5	-74.3	1.1				20	0.2	12903.9	1734.4	6851.2	12821.6	-142.8	2.5
		BLM	6	0.1	12609.9	377.2	11580	13158.9	1.2				3	0.1	2257.2	130.5	2031	2558.4	-59.5	2.1				9	0.2	3768	508.3	2893.1	4759.7	-50.8	3.6				21	0.2	7008.1	645.8	11440.5	14209.7	-142.8	2.5
													4	0.1	2561.2	57.2	2468.2	2701.5	-59.5	2.1				10	0.2	21926	1381.9	18599.5	24271.3	-50.8	3.6				22	0.2	12541.9	539	6034.1	8030.6	-147.8	2.4
	deltaBLM + GFP-BLM-WT_ICRF_GFP-PICH-CEN-57 late ana.czi												5	0.1	3334	343.2	2539	3733.5	-60.8	2.2															23	0.2	5050	472.7	12058.2	13768.5	-147.8	2.4
	Background	PICH	1	0.2	2897.1	180.2	2602	3342	2.6				6	0.1	2610.1	65.3	2469.1	2717.2	-60.8	2.2		deltaBLM + GFP-BLM-delta13_ICRF_GFP-PICH-CEN-51 mid ana.czi													24	0.1	13861.9	457.9	3506.5	5615.3	-16.6	1.6
	Background	BLM	2	0.2	6610.3	148.7	6352	6909	2.6				7	0.1	2925.4	403.2	2185.9	3388.8	-66.9	1.7				1	0.1	2236.4	81.2	2071.1	2427.8	-127.6	2.1				25	0.1	9815.4	436	13273	14736.8	-16.6	1.6
		PICH	3	0.2	9598.9	2483.3	6276.3	14463.1	2.7				8	0.1	2920.8	71.8	2790.1	3045.8	-66.9	1.7				2	0.1	3753.8	147.6	3356	3955.6	-127.6	2.1				26	0.1	13154.3	1589.7	7265	13112	-110.2	1.7
		BLM	4	0.2	9174.6	1409.7	7614	12683	2.7				9	0.1	3555	315.7	2800.2	4017.9	-60.4	1.9				3	0.1	6350.4	969.7	4155	7611.5	-142.8	1				27	0.1		352	12219	13817.2	-110.2	1.7
		PICH	5	0.3	9737.6	1770.6	6484	12807.3	4.4				10	0.1	2661.4	89.8	2501.4	2844.7	-60.4	1.9				4	0.1	4606.3	326.1	3994.5	4986.3	-142.8	1
		BLM	6	0.3	8028.9	910.1	6604	10201.4	4.4				11	0.1	3244.8	310.9	2577	3764.6	-55.8	1				5	0.3	4246.5	978.9	3155	6586.2	-138	5.3		deltaBLM + GFP-BLM-NN_ICRF_GFP-PICH-CEN-35 mid ana.czi
		PICH	7	0.3	5079.9	442.2	4278	6248.2	5				12	0.1	2660.3	68.8	2526	2791.1	-55.8	1				6	0.3	3841.3	404.1	3217.9	4527.4	-138	5.3				1	0.2	1106.3	193.8	1801	2567.3	-157.4	2.5
		BLM	8	0.3	6687.8	140.8	6363.9	7013.8	5				13	0.2	2925.5	232.5	2465.5	3233.1	-72.4	2.7				7	0.1	5781	648.5	4776.5	7075.3	-137.7	1.4				2	0.2	6012	137.6	5782	6259.8	-157.4	2.5
													14	0.2	2981.6	70.2	2806.1	3099.8	-72.4	2.7				8	0.1	4349.5	181	3751	4512	-137.7	1.4				3	0.2	5230.5	1203.4	3769	7654.4	-152.7	2.3
	deltaBLM + GFP-BLM-WT_ICRF_GFP-PICH-CEN-56 late ana.czi												15	0.2	2529.9	247	2049	3075.5	-72.8	2.8				9	0.1	5893.6	433.8	4992.8	6630.9	-126.6	1.6				4	0.2	6605.7	463.8	5754.4	7180.7	-152.7	2.3
	Background	PICH	1	0.2	2089.6	94.5	1912	2285.7	3				16	0.2	2838.9	75.4	2697	2996	-72.8	2.8				10	0.1	4709.9	226.9	4246.5	5123.3	-126.6	1.6				5	0.2	4150.7	1158.3	2905.7	7342.2	-172	3.3
	Background	BLM	2	0.2	19013.7	287.2	18394	19553	3				17	0.1	3224.7	377.5	2380.5	3742.7	-62.6	1				11	0.3	4584.3	962.2	3027.2	6674	-133.3	4.6				6	0.2	5936.3	608.7	4988	7207.9	-172	3.3
		PICH	3	0.2	4987.5	2847.2	2344.8	10781	3.4				18	0.1	2667.2	53.1	2575	2750.3	-62.6	1				12	0.3	4274.6	601.3	3153.5	5647.6	-133.3	4.6				7	0.2	4998.6	583.1	3970.2	5970	36.3	2.4
		BLM	4	0.2	20205.2	1697.5	18130.6	23695.3	3.4				19	0.1	3163.4	334.1	2379.5	3566.2	-52.3	1.3				13	0.1	5746.7	1508.8	4018	8125.5	-141.5	1.4				8	0.2	7527.3	334.1	6760	8123.9	36.3	2.4
		PICH	5	0.1	5338.6	668.7	4313	6113.3	0.8				20	0.1	3021.8	80.2	2871	3135.7	-52.3	1.3				14	0.1	4459.7	541	3624	5143.3	-141.5	1.4				9	0.3	4702.1	606.6	3500	6543.1	10.7	3.8
		BLM	6	0.1	21118.5	964.5	19289	22240.3	0.8															15	0.1	5294.6	2136.6	3095	8956.1	-121.8	1.1				10	0.3	6459.1	454.7	5433	7177.5	10.7	3.8
											deltaBLM + GFP-BLM-delta51_ICRF_GFP-PICH-CEN-38 early ana.czi													16	0.1	4112.7	529.5	3512	5041.7	-121.8	1.1				11	0.2	3561.4	870.4	2300.9	4854.9	-175.9	2.7
	deltaBLM + GFP-BLM-WT_ICRF_GFP-PICH-CEN-55 mid ana.czi												1	0.1	2403.2	83.4	2263.4	2556.2	-126	2.2															12	0.2	5840.6	603.6	5046.1	7277	-175.9	2.7
	Background	PICH	1	0.2	2428.4	142.6	2081	2703.7	3.7				2	0.1	5120	125.2	4934.1	5337.5	-126	2.2		deltaBLM + GFP-BLM-delta13_ICRF_GFP-PICH-CEN-50 ana-like.czi
	Background	BLM	2	0.2	6230.7	418.2	5332	6839	3.7				3	0.2	7956.5	1437.6	5025.5	10834.1	38.9	2.4				1	0.3	2480.1	156.8	2139.2	2808	-158.3	4.6		deltaBLM + GFP-BLM-NN_ICRF_GFP-PICH-CEN-34 ana.czi
		PICH	3	0.3	4839.6	931.6	3243.6	6993.4	5				4	0.2	5681.7	435.9	4872	6426.2	38.9	2.4				2	0.3	10380.1	373.7	9876.1	11192.6	-158.3	4.6				1	0.1	999.1	70.4	1569	1818	154.2	2.1
		BLM	4	0.3	7733.1	556.3	6320.2	8958.2	5				5	0.2	5903.8	952.6	4118	7653.3	31.9	2.8				3	0.1	8357.7	689.9	6717	9211.8	-68.6	0.8				2	0.1	9798.3	156	9431	10094.9	154.2	2.1
		PICH	5	0.1	4368.8	930.9	3206	7023	1.8				6	0.2	5221.7	289.3	4748.9	5832.9	31.9	2.8				4	0.1	10635	379.3	9807	11103.6	-68.6	0.8				3	0.1	2379.9	341.9	1899.6	3003.1	105.4	2
		BLM	6	0.1	6514.9	532.7	5859.5	8111.9	1.8				7	0.1	6467.4	758.3	5610.8	7956.4	27.1	1.5				5	0.2	5825.1	1908.2	3437.7	9087.5	-73	2.8				4	0.1	7724.5	147.2	7488	8017	105.4	2
		PICH	7	0.1	3701.7	320.1	3194	4117	1.1				8	0.1	5746.2	315.1	5227.5	6304.4	27.1	1.5				6	0.2	10125.8	734.4	9229.5	11493	-73	2.8				5	0.2	4263.5	882.9	2968	5761.1	100.4	2.3
		BLM	8	0.1	7224.4	378.3	6501	7824	1.1				9	0.2	5938.9	790.6	4195.2	7159.2	26.3	2.7				7	0.1	5890.3	1007.4	4834.4	8781	-104	1.7				6	0.2	8850.1	150.8	8589.4	9193	100.4	2.3
		PICH	9	0.1	3553.9	573.3	2868.9	5220	1.5				10	0.2	5753.7	552.5	4877.2	6932.2	26.3	2.7				8	0.1	9907.3	272.5	9565.9	10694	-104	1.7				7	0.1	4430.2	675	3362	5145.3	91.6	1.2
		BLM	10	0.1	6701.1	487.2	6305.3	8207	1.5				11	0.2	4618	944.3	3141.3	6079.3	-140.5	2.7				9	0.1	6141.7	837	5073	8204.2	108.7	2.1				8	0.1	8846.3	95.8	8597.9	8973.3	91.6	1.2
		PICH	11	0.1	3707.6	438.2	3024	4383	0.8				12	0.2	6152	540.3	4911.8	6871.8	-140.5	2.7				10	0.1	9629.8	593.3	8632	10450.1	108.7	2.1				9	0.1	3664.5	462.3	3006.5	4348.9	108.4	1.4
		BLM	12	0.1	6969	375.7	5928	7387	0.8				13	0.2	6194.1	1717.5	2223	8195.1	-144.7	3.3				11	0.1	5417.7	685.5	4268.1	6122.8	-91.3	1.4				10	0.1	9821.5	355.8	9402.2	10462	108.4	1.4
		PICH	13	0.3	4761.8	491.3	3853	6085.6	4.5				14	0.2	6160.3	861.1	4140.9	7238.7	-144.7	3.3				12	0.1	9344.3	314.9	8803.5	9864	-91.3	1.4				11	0.2	5561.7	988.8	3760	7352.3	-67.5	2.5
		BLM	14	0.3	7246.2	623.2	5617	8186.4	4.5				15	0.2	5851.3	1860.2	2896.5	8377.5	-139	2.3				13	0.1	5883.1	849.4	4799.5	7332.2	-126.4	1.7				12	0.2	10875.5	417.7	10108.3	11738.3	-67.5	2.5
		PICH	15	0.2	4453.8	346.5	4001.2	5430.7	3.7				16	0.2	5818.3	748.3	4322.5	6751.4	-139	2.3				14	0.1	11530.8	242.6	10995	12169.3	-126.4	1.7				13	0.2	5015.1	383.9	4440.4	5875.6	-79.6	3.1
		BLM	16	0.2	7129.2	696.7	5837	8187.2	3.7															15	0.1	5221.6	567.7	4037	6221.4	-97.7	2.2				14	0.2	11185	224.2	10671.3	11640.8	-79.6	3.1
		PICH	17	0.3	4513.5	983.3	3064.8	6970.7	4.1		deltaBLM + GFP-BLM-delta51_ICRF_GFP-PICH-CEN-36 ana-like.czi													16	0.1	11670.2	642.1	10143.5	12347.4	-97.7	2.2				15	0.1	5311.7	1257.4	3539.3	7416.9	-82.6	1.5
		BLM	18	0.3	6594.1	578.5	5537.7	7630.7	4.1				1	0.1	3587.5	208.5	3239	3928.4	-103.1	2				17	0.1	6260.1	636.4	4668.5	7257.4	84.2	1.6				16	0.1	10051.5	466.6	9414.6	10937.9	-82.6	1.5
		PICH	19	0.1	5014.3	714.8	3776.8	6221.4	2.2				2	0.1	5543.8	168.4	5179.7	5793	-103.1	2				18	0.1	9735.9	701.2	8784.2	10874.1	84.2	1.6				17	0.2	4582.8	822.4	3015	6417	116.9	2.5
		BLM	20	0.1	6905	387.7	6184.7	7493.1	2.2				3	0.1	4152.3	521.9	2962	4887.3	-98.1	1.6				19	0.2	5189.9	799.9	3795.5	6631.6	-82.9	2.6				18	0.2	9715	403.8	9149.1	10743	116.9	2.5
													4	0.1	5080.8	145.2	4736	5307.2	-98.1	1.6				20	0.2	9738.9	616.4	8840	10943.5	-82.9	2.6				19	0.2	4167.3	646.7	2959.5	5109.5	119.4	2.6
	deltaBLM + GFP-BLM-WT_ICRF_GFP-PICH-CEN-53 mid ana.czi												5	0.1	4635.2	325.1	4053.5	5211.2	-66.4	1.4				21	0.1	7186.8	953.9	5450	8388	-40.6	0.9				20	0.2	9601.3	374.2	9057.2	10501.9	119.4	2.6
	Background	PICH	1	0.3	3898.7	302.9	3399.7	5047	5.1				6	0.1	5868.3	208.6	5517.2	6157.4	-66.4	1.4				22	0.1	11078.7	338.2	10374.2	11415.1	-40.6	0.9				21	0.1	3438.5	549.6	2685.6	4549.7	118.4	1.8
	Background	BLM	2	0.3	8649.1	517.2	7760.5	9585.4	5.1				7	0.2	5233.2	784.5	3364.8	6009.1	86.9	2.4															22	0.1	8778.9	386.5	8172.4	9531.6	118.4	1.8
		PICH	3	0.2	4063.1	847.1	2918.8	6257	3.6				8	0.2	5003.9	146.7	4665.8	5330	86.9	2.4		deltaBLM + GFP-BLM-delta13_ICRF_GFP-PICH-CEN-47 mid ana.czi													23	0.3	4364.6	1054.2	2598.6	7149.6	-19.8	4.4
		BLM	4	0.2	9280.6	420.1	8324	9943.5	3.6				9	0.1	7193.8	782.6	5780	8181.5	-103.8	1.9				1	0.1	2566.7	167.8	2251	2888.9	-64.3	2				24	0.3	10466.1	603.2	8788	11828	-19.8	4.4
		PICH	5	0.1	5471.9	660.1	4088.4	6464	1.8				10	0.1	5163.9	211.1	4797	5461.6	-103.8	1.9				2	0.1	15489.2	1008.8	13234	16630.9	-64.3	2
		BLM	6	0.1	9294.6	506.9	8269.9	9978	1.8				11	0.2	7283	1768.4	3829.5	9861.1	-98.1	3.4				3	0.1	4020.9	366	3302	4451	-87.2	1.3		deltaBLM + GFP-BLM-NN_ICRF_GFP-PICH-CEN-33 mid ana.czi
		PICH	7	0.2	4430.8	937.9	3235.3	6335	3.8				12	0.2	5535.6	484	4803.8	6401.8	-98.1	3.4				4	0.1	14732	290.8	13917	15170.6	-87.2	1.3				1	0.1	1228.2	108	1643.3	1975.8	163.1	1.1
		BLM	8	0.2	8707.6	548.7	7643.9	9624	3.8				13	0.1	6770.7	798.1	5576.1	8214.8	-94.2	1.8				5	0.3	4520.8	506	3432	6065.9	-96.3	4.4				2	0.1	4340.2	198	4045	4797.5	163.1	1.1
		PICH	9	0.2	6423.8	490.7	5331.2	7085.1	2.7				14	0.1	5001.2	289.6	4469.1	5419	-94.2	1.8				6	0.3	14845.8	781.6	12791	16706.1	-96.3	4.4				3	0.2	3663.6	536.5	2850.2	4601.3	-14.4	2.5
		BLM	10	0.2	9040.8	168	8619.6	9436.8	2.7				15	0.1	7229	574.2	6102.5	8263.5	-118.3	1				7	0	5215.6	300.4	4689.5	5605.5	-90	0.7				4	0.2	4320.8	204.1	3844	4709.7	-14.4	2.5
		PICH	11	0.4	5620	1316.4	2934	8000.4	6.2				16	0.1	5385.3	213	5095.5	5812.5	-118.3	1				8	0	15513.6	563.8	14746.2	16270.8	-90	0.7				5	0.3	3861.8	482.4	2940	4652.8	150.6	4.1
		BLM	12	0.4	8827.2	1199.3	6859	11008.8	6.2				17	0.2	5114.5	585.7	3453.5	6009.2	-96	2.8				9	0.1	5186.3	459.7	3888	5737.5	-106.1	2				6	0.3	4666.6	189.9	4125	5129.4	150.6	4.1
													18	0.2	4980.1	152.2	4669.7	5228.1	-96	2.8				10	0.1	14630.6	570.6	13287	15408.1	-106.1	2				7	0.1	3779.2	445.7	2827.8	4403.4	-14.4	1.2
	deltaBLM + GFP-BLM-WT_ICRF_GFP-PICH-CEN-52 early ana.czi												19	0.3	5309.5	896.7	2964.5	6512.7	-96.7	3.9				11	0.2	4716.5	590.2	3622.8	5739.5	90	2.5				8	0.1	5018.5	142.5	4755.8	5181.3	-14.4	1.2
	Background	PICH	1	0.2	2606.9	67.7	2403.8	2765	2.8				20	0.3	4768.3	277.5	3956.5	5343.3	-96.7	3.9				12	0.2	13933.6	1419.5	11351	15824.8	90	2.5				9	0.4	3441.6	496.8	2331	4338.3	-3.9	5.7
	Background	BLM	2	0.2	4569.2	168.2	4264.2	4890	2.8				21	0.3	5502.6	1923.8	2953.1	8523.7	-92.9	3.8				13	0.1	4995.4	868.9	3628.5	6236.8	103	0.9				10	0.4	4537.4	231.3	4088.6	5027.1	-3.9	5.7
		PICH	3	0.2	6318.7	895.5	4589.6	7606.7	3.6				22	0.3	4636.9	512.6	3842.8	5561.2	-92.9	3.8				14	0.1	16986.4	792.6	16116	18397.9	103	0.9				11	0.2	3665	354.6	2806	4232.6	-3.9	2.8
		BLM	4	0.2	5465.1	457.8	4669	6910	3.6				23	0	7774.7	1990.9	4670.2	9972.1	90	0.6				15	0	4875.1	772.7	3626.8	5747.6	-156.4	0.6				12	0.2	4648.8	186.6	4252.1	5032.6	-3.9	2.8
		PICH	5	0.2	8333.4	1948.2	4353	11538.5	3.2				24	0	4892.9	294.3	4398	5172.6	90	0.6				16	0	13763.3	356.4	13197.8	14252.9	-156.4	0.6				13	0.1	3492.9	430.8	2934	4442.9	-11.3	1.7
		BLM	6	0.2	5239.5	338.4	4639	5860.4	3.2				25	0.1	5491.6	509.6	4716.5	6425.9	98.5	1.3															14	0.1	4251.5	112.2	3994	4432.5	-11.3	1.7
		PICH	7	0.2	7721	1040.3	6308	10515.5	3.4				26	0.1	5308.1	193.9	4974	5637.1	98.5	1.3		deltaBLM + GFP-BLM-delta13_ICRF_GFP-PICH-CEN-45 early ana.czi
		BLM	8	0.2	5163	162.5	4870	5498.1	3.4				27	0.1	9235.6	1433	7259	11165.2	84.8	0.7				1	0.2	2546.9	100.9	2333.3	2785.2	172.5	3.2		deltaBLM + GFP-BLM-NN_ICRF_GFP-PICH-CEN-31 metaphase-like.czi
		PICH	9	0.3	7618.3	741.5	5126	9452.2	4.2				28	0.1	5386.3	356.8	4843.5	6008.8	84.8	0.7				2	0.2	9679.2	190.1	9204.4	9983.2	172.5	3.2				1	0.1	1666.9	48	1552	1777	169.2	1.4
		BLM	10	0.3	5061.6	152.6	4769.7	5345	4.2															3	0.3	7669.3	1876	4360.5	10287.7	-70.2	4.7				2	0.1	5325.8	315.4	4777	5873	169.2	1.4
		PICH	11	0.2	7815	896.5	6469.1	10237.9	3.3		deltaBLM + GFP-BLM-delta51_ICRF_GFP-PICH-CEN-34 early ana.czi													4	0.3	10532.4	758.8	8310	11914.1	-70.2	4.7				3	0.1	3639.6	371.9	3147.8	4282.8	151.9	1.7
		BLM	12	0.2	5194.5	135.4	4936.4	5449.7	3.3				1	0.2	3806.7	460.2	2937	4579.8	-26.6	2.8				5	0.2	6148	896.6	4778	7812.4	112.8	3.3				4	0.1	4313.4	118.1	4066.1	4543.9	151.9	1.7
		PICH	13	0.3	6944.8	2428.2	3741.8	11481.5	4.2				2	0.2	4383.7	199.1	3967	4765.9	-26.6	2.8				6	0.2	10243.9	547.2	9159.5	11274.8	112.8	3.3				5	0.1	2813.3	409.2	2131.8	3541.9	-10	1.9
		BLM	14	0.3	5047.8	359.1	4401.4	5548.6	4.2				3	0.3	4760.9	547.9	3651.2	6081.9	-20.9	4				7	0.1	4981	548.8	4127.3	5905.5	119.9	1.5				6	0.1	4490	318.6	4085.9	5097.5	-10	1.9
		PICH	15	0.2	7919.6	918.2	6006.2	9389.3	3.1				4	0.3	4385.4	211.4	3918.5	4796.9	-20.9	4				8	0.1	10150.5	345.1	9511.5	10723.9	119.9	1.5				7	0.1	4401.3	1162.4	2218.2	5687	-40.6	1.2
		BLM	16	0.2	5136.9	224.1	4666.7	5554.1	3.1				5	0.2	6578.6	1278.7	4063.2	8387.6	-35.1	2.5				9	0.2	6048.2	738.9	5198.6	7800	114.8	2.4				8	0.1	5509.5	180.7	5210.5	5809.1	-40.6	1.2
		PICH	17	0.3	6754.1	1532.6	4199.3	9841.6	4.8				6	0.2	4712.8	302.6	4033.8	5189.6	-35.1	2.5				10	0.2	10078.4	465.1	9610	11200.9	114.8	2.4				9	0.1	3914.9	337.7	3423.1	4498	154.2	1
		BLM	18	0.3	5028.5	219.3	4507.9	5467.7	4.8				7	0.2	7680.1	1362.1	4752	9484.6	-20.8	2.5				11	0.2	7133.5	1270.6	5191	9172.5	116.6	2.4				10	0.1	4665.7	185.1	4389.1	5034	154.2	1
		PICH	19	0.3	7343.9	1445	4796	10692.4	4.3				8	0.2	5105.7	268.5	4465.2	5566.9	-20.8	2.5				12	0.2	9937.8	679.6	8403	10899	116.6	2.4				11	0.2	3620.8	424.7	3068.8	4465.2	155.4	2.6
		BLM	20	0.3	5411.3	190.8	5005.3	5840.4	4.3				9	0.2	8353.2	2503.1	4516	12758	-25.1	3.5				13	0.2	6635.7	1004.6	4826.1	8420.6	125.3	2.3				12	0.2	4881.5	376.9	4477.7	5692.9	155.4	2.6
		PICH	21	0.2	6665.5	1779.3	3547	9422.5	2.9				10	0.2	4576.2	516.2	3717.5	5797.5	-25.1	3.5				14	0.2	10183.7	598.4	8949.3	11157.6	125.3	2.3				13	0.1	3342.8	582.6	2273.2	4040.2	-35.5	0.8
		BLM	22	0.2	5160	259.4	4394	5513	2.9				11	0.1	8549.9	1793.5	5624.5	10743.2	-19.7	1.3				15	0.1	11222.9	1084.9	9609	13419.9	116.6	1.6				14	0.1	5567.7	151.5	5273.2	5747.1	-35.5	0.8
		PICH	23	0.3	7456.9	2107.5	4086	10417.5	4.5				12	0.1	5064.5	418	4504.5	5733.6	-19.7	1.3				16	0.1	11517.3	446.1	10689.5	12133.2	116.6	1.6				15	0.1	3574.4	635.5	2354.5	4466.2	-60.8	0.9
		BLM	24	0.3	5071.2	308.1	4509	5579.1	4.5				13	0.2	8282.3	2594.5	3714	12750.8	-21	3															16	0.1	5580.4	156.8	5377.5	5835.2	-60.8	0.9
		PICH	25	0.3	5766.8	719.4	4718.7	7376.7	4.3				14	0.2	4835.3	562.7	3791.4	5645.4	-21	3		deltaBLM + GFP-BLM-delta13_ICRF_GFP-PICH-CEN-44 mid ana.czi													17	0	3476.5	422.6	3010	4138.4	-33.7	0.6
		BLM	26	0.3	5640.4	158.1	5295	5913.2	4.3				15	0.2	8015.2	2635.9	4510.5	13198.1	-26.3	3				1	0.1	2594.4	71.6	2441.2	2721.8	178	1.9				18	0	5105.9	63.3	5004.7	5226.4	-33.7	0.6
		PICH	27	0.2	5579.1	521.3	4367	6865.2	2.5				16	0.2	5316.9	495.4	4584.5	6051.3	-26.3	3				2	0.1	18164.2	702.9	17110.3	19178.4	178	1.9				19	0.1	3419.6	173.2	3108.5	3762.2	-22	1.5
		BLM	28	0.2	5502.3	139.4	5123	5816.4	2.5				17	0.1	9720.7	2603.2	5780	13810.1	-9.1	1.6				3	0.3	4071.6	424.7	3159.2	4840.5	-179.6	5.2				20	0.1	4613.5	134.1	4386.3	4816.4	-22	1.5
													18	0.1	5648	392.3	4866.6	6180.4	-9.1	1.6				4	0.3	16760.4	2144.5	12165.3	18761.1	-179.6	5.2				21	0.1	4043.8	469	3259.5	4809	166	1.1
													19	0.2	8071.4	2575.2	4003	11857	159.3	2.8				5	0.1	4718.6	554.4	3878.3	5620.4	166.4	1.1				22	0.1	4513.5	168.7	4281.5	4820	166	1.1
	deltaBLM + GFP-BLM-WT_ICRF_GFP-PICH-CEN-51 mid ana.czi												20	0.2	4675.9	538.7	3882.3	5474.8	159.3	2.8				6	0.1	18394.6	242.9	18053.3	18855.6	166.4	1.1				23	0.1	4098.4	511.6	3356	4844.5	154.7	0.7
	Background	PICH	1	0.3	3016.2	148.1	2635	3354.8	3.8				21	0.1	6592.7	1353.3	4652	9027.7	-27.7	2.2				7	0.1	4711.8	839.4	3666	6293.6	-168.7	1.2				24	0.1	4542.1	103.7	4390	4706.7	154.7	0.7
	Background	BLM	2	0.3	14480.2	523.2	13132.1	15217.8	3.8				22	0.1	5184	290.3	4653	5715.6	-27.7	2.2				8	0.1	17805.1	524.8	16969.4	18854.8	-168.7	1.2				25	0	3906.9	159.5	3741	4221.3	144.8	0.7
		PICH	3	0.3	5107.8	1315.8	3006	8888.4	5.2															9	0.1	4198.6	469.1	3146	4897.7	-162.3	1.6				26	0	5090.9	130.8	4862.4	5247.4	144.8	0.7
		BLM	4	0.3	16225	1719.2	11804	19781.5	5.2		deltaBLM + GFP-BLM-delta51_ICRF_GFP-PICH-CEN-33 mid ana.czi													10	0.1	18830.6	1188	16523.5	20195.9	-162.3	1.6
		PICH	5	0.2	5548.4	1608.1	3961.2	8724.7	2.9				1	0.2	4215	358.9	3398.5	4828.9	-33.5	2.8													deltaBLM + GFP-BLM-NN_ICRF_GFP-PICH-CEN-30 mid ana.czi
		BLM	6	0.2	15330.5	804.4	12679	16788.9	2.9				2	0.2	5629.1	257	5066	6003.3	-33.5	2.8		deltaBLM + GFP-BLM-delta13_ICRF_GFP-PICH-CEN-40 mid ana.czi													1	0.1	1167.5	92	1979.9	2371.4	-169.3	2
		PICH	7	0.2	5149.7	607.7	4405	7027.6	3.3				3	0.1	5993.9	497	5305.6	7011.6	-21.4	1.8				1	0.2	2640.4	90.4	2455.5	2827	-74.6	2.3				2	0.1	11467.6	283	10796	11932.1	-169.3	2
		BLM	8	0.2	15501.4	883.9	13731	17862.8	3.3				4	0.1	5854.6	91.1	5602.7	6115.4	-21.4	1.8				2	0.2	8270.8	431.7	7337.5	8800.4	-74.6	2.3				3	0.1	5125	617.1	3833.3	5928.6	160.6	0.8
													5	0.1	6146.7	708.9	5133.1	7708.5	-30.7	1.7				3	0.2	5322.6	508.6	4440.8	6535	-44.6	3.3				4	0.1	12214.1	536.4	11511.5	12993.8	160.6	0.8
													6	0.1	5862.7	243.2	5293.5	6307.4	-30.7	1.7				4	0.2	8523.6	565.7	7304	9479.7	-44.6	3.3				5	0.1	6953.8	1431	4285.1	9147.4	-33.1	1.1
	deltaBLM + GFP-BLM-WT_ICRF_GFP-PICH-CEN-50 mid ana.czi												7	0.3	7397.1	1948.9	4144.1	10666.4	-22.5	4.6				5	0.2	5854	519.9	4765	6904.5	120	3.1				6	0.1	12443.7	551.2	11328.6	13213	-33.1	1.1
	Background	PICH	1	0.3	3478.1	457.8	3073.7	5085.5	4.4				8	0.3	6143.9	616.5	4992.9	7094	-22.5	4.6				6	0.2	8215.1	469.3	7068.5	8854.8	120	3.1				7	0.1	7646.7	1578.1	5452	10380.7	159.4	1.3
	Background	BLM	2	0.3	7454.5	442.7	6418	8267	4.4				9	0.4	6954.7	1840.8	3916.3	9980.5	-29.2	6				7	0.1	4936.6	673	3808.5	6175.2	118.3	1.9				8	0.1	13583.8	476.7	12544.8	14430	159.4	1.3
		PICH	3	0.1	5207.8	1172.6	3741	7318	1.3				10	0.4	6055.7	733.7	4869.2	6964.9	-29.2	6				8	0.1	7755.1	880.9	6126.8	9029.8	118.3	1.9				9	0.1	5870.8	1240.6	4440.4	7748	168	1.8
		BLM	4	0.1	8284.5	534.1	7173	9063	1.3				11	0.2	7192.5	1649.6	3698.8	9539.1	-30.7	3.5				9	0.1	5143.3	917.8	3491	7173.3	-90.9	2.1				10	0.1	12582.4	932.6	11087.1	13964.2	168	1.8
		PICH	5	0.2	6285.4	717.6	5305	7404	3.4				12	0.2	6073.2	565.5	5119.2	6743.3	-30.7	3.5				10	0.1	8865.7	474.5	7793	9390.6	-90.9	2.1				11	0.1	6130.6	1043.9	4140.1	7933.4	-178.4	0.8
		BLM	6	0.2	8935.7	478	8019	10028.4	3.4				13	0.1	8142.8	1014.3	5691.7	9420.8	-5.4	1.6															12	0.1	13510.4	649	11958.3	14242.8	-178.4	0.8
		PICH	7	0.2	6296.4	828.5	4039.2	7622.7	2.8				14	0.1	6197.4	245.5	5533.4	6547.3	-5.4	1.6		deltaBLM + GFP-BLM-delta13_ICRF_GFP-PICH-CEN-39 mid ana.czi													13	0	4727.9	546.8	3768.5	5577.5	152.4	0.6
		BLM	8	0.2	8549.5	725.1	6782.7	9589.8	2.8				15	0.3	6682.2	1625.3	3921.1	9937.6	-30.2	4.3				1	0.1	2799.4	65.3	2690.5	2915.1	-90	1.1				14	0	12202.3	239.7	11907.8	12554.9	152.4	0.6
		PICH	9	0.1	6163.5	868.6	4281	7483.2	1.5				16	0.3	5309.9	264.4	4900	5810.5	-30.2	4.3				2	0.1	13123.3	440	12531.4	14039.5	-90	1.1
		BLM	10	0.1	8483.9	849.8	6800	10114.5	1.5				17	0.2	6459.6	1960.1	4268.3	10024.1	-20.4	2.7				3	0.3	4944.3	979.5	3210.1	6690.9	75.5	3.9
		PICH	11	0.2	5355.6	962.6	3366	7177.5	2.6				18	0.2	5284	251.8	4904.2	5740.2	-20.4	2.7				4	0.3	14729.4	581.2	13465.2	15675.5	75.5	3.9		deltaBLM + GFP-BLM-NN_ICRF_GFP-PICH-CEN-29 early ana.czi
		BLM	12	0.2	7498.1	682.2	5874	8501.3	2.6				19	0.3	6968.3	2154.2	3351	12004.8	-29.6	5.3				5	0.3	4882.2	1529.6	2784.1	8688.9	-106	4.8				1	0.1	1484	55.2	1330.2	1561	-102	2
													20	0.3	5647.2	438.7	5077.5	6600.5	-29.6	5.3				6	0.3	14599.2	1348.9	11628	16129.1	-106	4.8				2	0.1	7359.6	379.7	6792.4	8075	-102	2
																																			3	0.2	5934.1	635.2	4365.5	7003.4	63.9	3.3
	deltaBLM + GFP-BLM-WT_ICRF_GFP-PICH-CEN-49 mid ana.czi										deltaBLM + GFP-BLM-delta51_ICRF_GFP-PICH-CEN-32 ana-like.czi											deltaBLM + GFP-BLM-delta13_ICRF_GFP-PICH-CEN-38 mid ana.czi													4	0.2	8827.9	338.8	7972.8	9408.6	63.9	3.3
	Background	PICH	1	0.3	2126.9	106.9	1798.2	2341.1	4.2				1	0.2	3373.6	651.2	2256.2	4379.9	-94	3.2				1	0.1	2060.4	96	1828.9	2236.8	-69.2	2				5	0.2	4843.1	735.3	3402.3	6414.7	-121.8	2.5
	Background	BLM	2	0.3	4422.4	326	3752.1	4881.9	4.2				2	0.2	5854.1	237.6	5404.8	6439.8	-94	3.2				2	0.1	4439.3	159.3	3898	4669.2	-69.2	2				6	0.2	8428	930.3	6386.5	9559	-121.8	2.5
		PICH	3	0.2	3671.3	410	2993	4396.3	2.7				3	0.2	4353.9	1126.3	2800.8	6874.6	-106.8	2.6				3	0.1	3763.7	458.2	2766	4490.2	96.7	2.2				7	0.1	6190.8	935.9	3459.5	7229.8	-98.8	1.5
		BLM	4	0.2	5503.2	265.1	4839	6028.4	2.7				4	0.2	5163.1	211.8	4852.8	5683.8	-106.8	2.6				4	0.1	4415	153.9	4106.5	4679.4	96.7	2.2				8	0.1	8666	572.5	7009	9195.9	-98.8	1.5
		PICH	5	0.2	4195.1	754.1	2515	5316.1	3.2				5	0.2	5900.3	919.3	4567.5	8106.6	-83.3	2.5				5	0.1	3761.4	666	2335	4773	-74.9	1.8				9	0.2	3795.4	322.1	3311.6	4688	53.6	2.5
		BLM	6	0.2	6057.6	447.3	5006	6965.4	3.2				6	0.2	5468.1	377	4982.7	6293.6	-83.3	2.5				6	0.1	4720.4	190.3	4298	5023.8	-74.9	1.8				10	0.2	8492.6	335.4	7421	8890.2	53.6	2.5
		PICH	7	0.1	5003.6	801.9	3582	6833.8	1.8				7	0.2	6648.8	1765.4	3092	9905.1	-90.6	3.1				7	0.1	4630.7	753.7	3333	5496.4	-63.4	0.9				11	0.1	4509.5	832.6	3085.5	5741.9	-144.6	1.5
		BLM	8	0.1	6086.5	401.3	5368	6944.6	1.8				8	0.2	6217	490.7	5055.1	6848.2	-90.6	3.1				8	0.1	4235.4	97.6	3975	4349.6	-63.4	0.9				12	0.1	8010	891.7	6724	9344.5	-144.6	1.5
		PICH	9	0.1	6517.6	859.4	5423	8171	1.1				9	0.2	5374.5	901.4	3626.8	7111.8	-84.7	2.5				9	0.1	4828.8	553.2	3503	5674.5	-84.5	2				13	0.1	4876.8	374.7	4318.1	5588.4	64.6	1.4
		BLM	10	0.1	6584.3	505.1	5911.4	7478.5	1.1				10	0.2	6443.4	428.3	5499.8	7056.4	-84.7	2.5				10	0.1	4526.1	138.7	4225.5	4857.4	-84.5	2				14	0.1	7971.3	432.3	7195.2	8561.5	64.6	1.4
		PICH	11	0.1	3902.4	844.4	2445	5125	1.3				11	0.1	3936	256.3	3429	4309.7	-100.7	1.9															15	0.1	5714.2	590.2	4537	6299.2	-143.1	1
		BLM	12	0.1	5057	153.1	4777	5298	1.3				12	0.1	5404.6	307.9	4943.3	6149.1	-100.7	1.9		deltaBLM + GFP-BLM-delta13_ICRF_GFP-PICH-CEN-37 metaphase-like.czi													16	0.1	8347.5	257.1	8005.5	8876.6	-143.1	1
													13	0.2	5230.3	1144.8	3318	7179.9	-94.7	2.8				1	0.2	2016.7	68	1890.3	2154.3	-134.3	2.6
	deltaBLM + GFP-BLM-WT_ICRF_GFP-PICH-CEN-48 early ana.czi												14	0.2	5291.2	171.2	4887	5605.4	-94.7	2.8				2	0.2	13470.8	473.5	12701.5	14250.9	-134.3	2.6		deltaBLM + GFP-BLM-NN_ICRF_GFP-PICH-CEN-28 early ana.czi
	Background	PICH	1	0.2	4103	228.7	3823	4707.7	2.5				15	0.1	4525.6	614.8	3249.5	5647.8	-82.3	1.7				3	0.1	3357.6	329.2	2870.5	3826.3	-39.1	1.2				1	0.1	1122.8	156.8	1431.5	1997.7	-124.8	1.8
	Background	BLM	2	0.2	7840.2	189.6	7458.4	8238	2.5				16	0.1	5272	134.1	4882.5	5509	-82.3	1.7				4	0.1	13542.4	492.8	12722.4	14419.4	-39.1	1.2				2	0.1	5279.5	150.2	5001	5533.3	-124.8	1.8
		PICH	3	0.1	10037.4	1232.3	7691	12097.1	1.3				17	0.2	4247.9	751.5	2896	5767	-94.4	3				5	0.1	3479.2	389.6	2556	4077.7	-22.6	1.7				3	0.1	3979	1462	2742.1	6938.1	-103.7	1.4
		BLM	4	0.1	9890.8	246.7	9437	10243.5	1.3				18	0.2	5128.4	185.2	4741	5611.1	-94.4	3				6	0.1	13311.5	403	12592	13936.4	-22.6	1.7				4	0.1	5700.4	333.8	5327.7	6455.4	-103.7	1.4
		PICH	5	0.1	9084.3	1406.7	6614	12543.4	2.2				19	0.2	4242.1	800.5	2628.1	5781.5	-106.6	3.8				7	0	3474.9	302.5	2941.8	3780.2	155.4	0.6				5	0.2	4552	1239	2538	7345.6	-101.5	3.4
		BLM	6	0.1	9587.3	373.4	9044	10468.7	2.2				20	0.2	4895.9	222.8	4458.5	5374.1	-106.6	3.8				8	0	13007.1	109.4	12829.7	13166	155.4	0.6				6	0.2	6300.5	339.3	5485	6734.5	-101.5	3.4
		PICH	7	0.1	11321.3	891.7	9055.2	12624	2.1															9	0.1	3424.4	275.8	3135.9	3927.3	168.4	1.8				7	0.1	5186.5	1386.1	2864	6971.9	-151.6	0.9
		BLM	8	0.1	9259.4	315.7	8383	9784.5	2.1		deltaBLM + GFP-BLM-delta51_ICRF_GFP-PICH-CEN-31 mid ana.czi													10	0.1	11885.3	553.7	11230.8	13119.8	168.4	1.8				8	0.1	6189.5	366.6	5629.5	6649.5	-151.6	0.9
		PICH	9	0.1	10033.1	337.9	9241	10408.6	1.2				1	0.2	4226.7	873.1	2461	5368.5	-133.7	3.1				11	0.1	2953.7	201.4	2659.8	3300.2	142.3	1.5				9	0.1	5085.7	335.7	4236.5	5605.2	90	1.8
		BLM	10	0.1	8208.3	171.7	7830.5	8489.9	1.2				2	0.2	3933.1	250.8	3430	4388.3	-133.7	3.1				12	0.1	13052	1754.7	10427.9	16242.7	142.3	1.5				10	0.1	6895.1	209.3	6526.2	7263	90	1.8
		PICH	11	0.2	7765.9	1032.8	6517.5	10486.5	3				3	0.3	6674.9	1756.8	4388.9	10212.7	-134.2	4.9				13	0.1	3651	219.8	3130.4	3847.2	143.8	0.7				11	0.2	3740.9	735	2632.2	4944.8	-107.7	3.4
		BLM	12	0.2	9068	330.3	8537.9	9711.6	3				4	0.3	3866.1	344.9	3273.5	4626.2	-134.2	4.9				14	0.1	11695.1	520.1	11071.1	12461.5	143.8	0.7				12	0.2	6209	529.1	5347	7226.5	-107.7	3.4
		PICH	13	0.1	7757.9	593	6085	8709.5	2				5	0.2	9193.5	2728.9	5413	14592	-136.9	3.4				15	0.1	4663	394.7	3970.8	5384.1	161.6	0.7				13	0.1	4145.2	588.9	3091.5	5346.6	76.3	1.5
		BLM	14	0.1	8917.3	188.5	8510.5	9352.9	2				6	0.2	4610.1	549	3612.5	5561.3	-136.9	3.4				16	0.1	11710.6	395.8	11041.7	12158.5	161.6	0.7				14	0.1	7310.5	350.6	6531	7869.9	76.3	1.5
		PICH	15	0.3	9852.8	1595.3	7826	13008.3	4.1				7	0.2	5294.9	881	3805.3	7028.2	-131.9	3.8															15	0.1	4921.7	1046.4	3322.5	6229.6	-123	0.8
		BLM	16	0.3	9378.5	651.4	8242.9	10479.5	4.1				8	0.2	3492.3	287	3079.7	4048.1	-131.9	3.8		deltaBLM + GFP-BLM-delta13_ICRF_GFP-PICH-CEN-37 metaphase-like.czi													16	0.1	6518.2	382.5	5940.9	7010	-123	0.8
		PICH	17	0.2	11436	1476.8	8267.5	15067.4	2.4				9	0.1	7386.6	1414.9	4976.5	9869.8	-122.5	2.2				1	0.2	2143.7	97.1	1980.4	2343	-8.7	2.6				17	0.1	4056.9	613.9	3326.5	5109.2	-128.4	1.2
		BLM	18	0.2	8957.8	750.7	7768.3	9987.9	2.4				10	0.1	4204.6	241.8	3716	4532.6	-122.5	2.2				2	0.2	11391.1	1095.3	10033	13582	-8.7	2.6				18	0.1	6348.1	211.4	5926.9	6740.3	-128.4	1.2
		PICH	19	0.1	10391.7	1217.4	8525	12475.7	1.8				11	0.1	7941.9	2170.4	5179.2	13486.2	-119.7	2.1				3	0.2	3791.4	409.8	3087	4656.4	9	2.5
		BLM	20	0.1	10560.8	511.5	9451	11295	1.8				12	0.1	3919.1	330.1	3292.2	4589	-119.7	2.1				4	0.2	11105.9	768.9	9985	12969.7	9	2.5		deltaBLM + GFP-BLM-NN_ICRF_GFP-PICH-CEN-26 ana-like.czi
		PICH	21	0.2	7014.8	1042.1	4974.2	8924.5	2.9				13	0.2	4850.2	618.4	3944	6227.5	-140.5	2.4				5	0.1	3855.6	420.8	2962	4302.8	-141.3	0.8				1	0.1	1440.4	79.1	2365.7	2617	133.7	1
		BLM	22	0.2	9180.3	516	8121	10229.4	2.9				14	0.2	3990.7	254.5	3505.6	4487.8	-140.5	2.4				6	0.1	10640.5	569.2	9696	11525	-141.3	0.8				2	0.1	8469.8	281.2	8132.6	8977.4	133.7	1
		PICH	23	0.2	7073.9	864.4	4963	8275.3	2.8				15	0.1	11452.9	2016.1	8209.5	14807.4	46.8	1.4				7	0.1	3938.2	473	3313.7	4692.5	-151.9	1.1				3	0.2	6129.5	734.4	4991.1	7520.9	103.1	2.4
		BLM	24	0.2	9468.2	367.3	8750	10076.2	2.8				16	0.1	4443.8	357.3	3795.1	4876.9	46.8	1.4				8	0.1	9402.7	350.5	8709	9822.1	-151.9	1.1				4	0.2	8904.6	369	8434.7	9708.1	103.1	2.4
		PICH	25	0.1	6207.1	769	5043.8	7388.9	1.5															9	0.1	3773	391.7	3071	4397.6	-176.3	2				5	0.2	6330.2	994.5	4847.1	7732.6	102.5	2.7
		BLM	26	0.1	10026.6	517.3	9028	10614.1	1.5		deltaBLM + GFP-BLM-delta51_ICRF_GFP-PICH-CEN-30 ana-like.czi													10	0.1	9832.6	283.4	9270.9	10270.2	-176.3	2				6	0.2	9168.8	445.8	8653.2	10102.1	102.5	2.7
		PICH	27	0.1	6294.6	510.5	5041	7293	2				1	0.2	3050.5	394.7	2437	3764	-114.4	3.1				11	0.3	3525.4	484.9	2760	4571.9	14.9	4				7	0.1	8547.3	821.5	6845	9967.6	-88.3	1.1
		BLM	28	0.1	8997.4	218.4	8698.3	9405.2	2				2	0.2	5619.8	122.9	5390	5893.1	-114.4	3.1				12	0.3	10679.3	749.5	9779.3	12204	14.9	4				8	0.1	8285.6	119.5	8082.2	8504.1	-88.3	1.1
		PICH	29	0.2	8188.7	1052.5	6500.5	11412.1	3.4				3	0.2	7803	2098.6	4832	11497.9	-117.8	2.6				13	0.1	4137.8	865.3	2905.2	5249.7	17.1	1.8				9	0.1	5242.4	400.7	4431.7	5674.8	-86.1	0.9
		BLM	30	0.2	8040	286.7	7535.9	8613.5	3.4				4	0.2	6144.4	629.4	5029.5	7050.5	-117.8	2.6				14	0.1	11651.8	467.8	10911.6	12908	17.1	1.8				10	0.1	7992.6	162.8	7740.3	8266	-86.1	0.9
		PICH	31	0.1	4986.6	289.8	4540.2	5547.1	1.1				5	0.2	7107.7	1747.5	4530.5	10838.8	81.7	2.7															11	0.2	7061.9	1971.5	3831	11010.4	-85.4	2.8
		BLM	32	0.1	8504.2	336.5	7983.4	9075	1.1				6	0.2	6221.5	496.2	5212.2	6930.8	81.7	2.7		deltaBLM + GFP-BLM-delta13_ICRF_GFP-PICH-CEN-31 metaphase-like.czi													12	0.2	9618.3	530.8	8583.2	10367	-85.4	2.8
													7	0.2	4917.7	1175.9	3131	7566.9	-128.2	2.9				1	0.1	1961.3	57.4	1812.8	2038.1	-121.3	1.8				13	0.2	6653.5	2032.2	4315	10107	90.6	3.1
													8	0.2	5654.2	307.2	4996	6089.9	-128.2	2.9				2	0.1	6358.4	427.3	5909.6	7213.6	-121.3	1.8				14	0.2	9206.9	481.6	8470.7	10097.4	90.6	3.1
	deltaBLM + GFP-BLM-WT_ICRF_GFP-PICH-CEN-47 mid ana.czi												9	0.1	5553.9	659.4	4266	6691.9	-110.6	1.7				3	0.1	4478.4	226.3	4175.6	4945	136.8	1.4				15	0.2	6420.6	1889.2	4186.4	9768.6	-86.8	3.5
	Background	PICH	1	0.2	3158.9	161.5	2822	3533.2	3.6				10	0.1	5430.5	361.1	4821	5890.2	-110.6	1.7				4	0.1	6593.8	127.8	6364	6887	136.8	1.4				16	0.2	8647.5	307.2	8065	9345.7	-86.8	3.5
	Background	BLM	2	0.2	5354	221.8	4795	5699.1	3.6				11	0.2	4897	792.7	3732	6222.5	-101.3	2.3				5	0.1	3015.3	388.3	2441.9	3984.1	-30.3	1.8				17	0.1	8379.8	819	7282	9755.5	-85.2	1.2
		PICH	3	0.1	5030.6	458.1	4183	5816	1.9				12	0.2	5894.4	248.4	5349.5	6266.6	-101.3	2.3				6	0.1	6385.2	184.2	6147.4	6796	-30.3	1.8				18	0.1	8665.7	204	8451.2	9129.5	-85.2	1.2
		BLM	4	0.1	6121.7	211	5748.6	6697.9	1.9				13	0.1	9292.2	1880.8	6417.2	12921.2	52.7	1.9				7	0.1	4001.4	526.2	3093	4874.6	146.3	1.4				19	0.3	4729	703.7	3614.5	6543.9	93.9	3.8
		PICH	5	0.1	5626.2	731	4344	7050	1.5				14	0.1	6380	367	5713.2	6999.1	52.7	1.9				8	0.1	6681	145.4	6401.6	6873.6	146.3	1.4				20	0.3	7863.8	506.9	7088.9	8827.6	93.9	3.8
		BLM	6	0.1	6504.4	430.6	5880.2	7300	1.5				15	0.3	6327.7	2794.4	2908.5	11760	-119.1	4.3				9	0.1	4359.2	369.9	3666	4793.5	-32.7	1.1				21	0.3	4926.9	570.6	3291	6237.1	-74.6	4.9
		PICH	7	0.2	5886.9	1164.5	4613.5	8686.4	2.8				16	0.3	5465.6	895.5	4221.5	7177.2	-119.1	4.3				10	0.1	6883.6	111.3	6638	7055	-32.7	1.1				22	0.3	8654.9	436.5	7526	9425.8	-74.6	4.9
		BLM	8	0.2	6327.3	288.2	5789.3	6994.4	2.8				17	0.2	3833.5	485.1	2844	4829.2	-110.2	3.3				11	0.1	4117.6	269	3364	4411.2	131.2	0.7				23	0.3	5286.1	964	2806	6996.5	-65	4.9
		PICH	9	0.1	4425.8	622.7	3539	5335.5	0.8				18	0.2	6371.1	220.3	5787.5	6866.4	-110.2	3.3				12	0.1	7044.6	246.7	6785.7	7544	131.2	0.7				24	0.3	8946	537.1	7612.6	9990.2	-65	4.9
		BLM	10	0.1	6147.5	331.3	5445	6505.8	0.8															13	0.1	5170.6	623.7	3824	5847.8	143.1	1.6				25	0.1	3513.4	577.1	2737	4522.2	-88.6	1.3
		PICH	11	0.1	6300	771.5	4360.5	6915.8	1		deltaBLM + GFP-BLM-delta51_ICRF_GFP-PICH-CEN-29 mid ana.czi													14	0.1	6123.1	135.3	5770	6400	143.1	1.6				26	0.1	7284.8	150.9	6980.8	7484.4	-88.6	1.3
		BLM	12	0.1	6503	509.6	5459.5	7136.1	1				1	0.2	3036.9	244	2680.5	3590.2	-66.7	2.4				15	0.1	4314.3	757.1	2927	5267	-31	0.8				27	0.1	6892.4	1631.4	4794	9822.8	-16.3	2.2
		PICH	13	0.1	4968	357.1	4209.5	5586.6	1.6				2	0.2	4850.8	134.6	4539.7	5113.7	-66.7	2.4				16	0.1	7097.1	234.2	6711	7394	-31	0.8				28	0.1	8703.5	564.1	7784	9693.9	-16.3	2.2
		BLM	14	0.1	6055.3	254.8	5623	6603.3	1.6				3	0.2	6877.8	2543.7	3352.3	11111.4	-69.5	3.3
													4	0.2	5055.4	596.7	3981.5	6219.1	-69.5	3.3		deltaBLM + GFP-BLM-delta13_ICRF_GFP-PICH-CEN-28 ana-like.czi											deltaBLM + GFP-BLM-NN_ICRF_GFP-PICH-CEN-25 early ana.czi
	deltaBLM + GFP-BLM-WT_ICRF_GFP-PICH-CEN-46 mid ana.czi												5	0.1	8959.4	1512	6266.4	11357.3	-23.6	0.8				1	0.1	2509.9	91.9	2363.7	2778	172.2	1.4				1	0.2	1692.6	94.3	1511	1876.3	-107	2.8
	Background	PICH	1	0.2	2880.1	389.5	2292	3928.3	3.7				6	0.1	5516.5	246.1	5018.5	5821.5	-23.6	0.8				2	0.1	4146	134.3	4724.4	5177.5	172.2	1.4				2	0.2	5753.4	151.2	5435.6	6187	-107	2.8
	Background	BLM	2	0.2	11311.7	470.1	10451.3	11966.4	3.7				7	0.2	5967.3	855.2	4168.9	7289.1	-47.2	2.4				3	0.1	6692.2	1120	4619	8251.1	-43	1.3				3	0.3	6309.1	1174.9	4158	8795.2	-99.5	4.3
		PICH	3	0.1	3977.9	487.3	3041	4704.8	2.1				8	0.2	4683.8	290.4	4106.4	5038.1	-47.2	2.4				4	0.1	4217.6	109.4	4031.4	4407	-43	1.3				4	0.3	6146.2	729	5283.7	7473.8	-99.5	4.3
		BLM	4	0.1	11424.7	344.4	10764.3	12017.3	2.1				9	0.1	5412.3	742	3793.3	6792.6	-23.3	1.9				5	0.1	6914.5	2068.3	4580	10232.7	-33.7	0.9				5	0.2	6511.2	1136.2	4493.2	8535.3	-100.5	3.6
		PICH	5	0.3	4472.9	770.8	3089	6371.3	4				10	0.1	4842.7	414.7	4053.1	5464.9	-23.3	1.9				6	0.1	4483.9	119.2	4212	4637.9	-33.7	0.9				6	0.2	6329.3	620	5301.7	7324.1	-100.5	3.6
		BLM	6	0.3	11885.7	527.1	10650	12871.3	4				11	0.1	4553.6	658.5	2972.4	5392.3	-46.8	1				7	0.1	6611.9	925.5	4660.5	7747.5	137.5	2.1				7	0.4	6041.3	1845.9	2953	9738.8	-98.4	6
		PICH	7	0.1	4452.4	934.6	3001	5878	1				12	0.1	4713.9	321.5	4188.6	5228.5	-46.8	1				8	0.1	4194.7	128.8	3967.5	4460.9	137.5	2.1				8	0.4	5897.5	841.6	4745	7694.8	-98.4	6
		BLM	8	0.1	11197.4	287.3	10419	11529	1															9	0.1	9716.1	1665.1	7358	12371.2	57.5	0.8				9	0.2	6340	1089.7	4142.2	8238.3	-96.2	3.3
		PICH	9	0.1	5887	800.9	4457	7464	1		deltaBLM + GFP-BLM-delta51_ICRF_GFP-PICH-CEN-28 mid ana.czi													10	0.1	4478.7	93.5	4318	4674.1	57.5	0.8				10	0.2	6305.4	512.1	5501	6997.8	-96.2	3.3
		BLM	10	0.1	14072	672.5	12600	14840.5	1				1	0.3	2631.2	335.2	1923	3314	0	4.4				11	0.1	5494.6	836.2	4186	6650.4	148	1.8				11	0.1	5512.3	713.4	4428.5	7186.2	-104.6	1.5
		PICH	11	0.1	5358.5	876.6	3428	6585.4	1.1				2	0.3	3651.9	189.7	3058.5	3840.5	0	4.4				12	0.1	4144.9	183.9	3822.8	4506.5	148	1.8				12	0.1	6185	135.4	5956.5	6421.6	-104.6	1.5
		BLM	12	0.1	11543.3	423.6	10546.7	11955.4	1.1				3	0.2	5511.3	1006.2	3082	6778.9	-169.4	2.6				13	0.1	5684.1	1859.8	3750	9908.9	-35.5	1.7				13	0.4	4255.1	816.4	3257.5	6028.6	75.8	5.8
		PICH	13	0.1	4492.1	581	3115	5536	1.5				4	0.2	3794.2	135.1	3521.3	3984	-169.4	2.6				14	0.1	4386.9	135.4	4158	4629.7	-35.5	1.7				14	0.4	5451.1	503.2	4713.7	6368.7	75.8	5.8
		BLM	14	0.1	11306.8	397.7	10262	11805	1.5				5	0.2	6027.8	670.8	4631.5	6966.8	-166.9	2.3															15	0.3	6361.1	1677.3	3507	9534	-19.1	4.2
													6	0.2	3616	172.9	3181.1	3896.1	-166.9	2.3		deltaBLM + GFP-BLM-delta13_ICRF_GFP-PICH-CEN-27 late ana.czi													16	0.3	6555.4	570.4	5476.4	7755.6	-19.1	4.2
	deltaBLM + GFP-BLM-WT_ICRF_GFP-PICH-CEN-45 early ana.czi												7	0.1	4891.5	553.9	3714	5909.5	-174.6	2.1				1	0.2	2840.4	81.2	2618.5	3001.7	-66.4	2.3
	Background	PICH	1	0.4	2537.7	275.1	2107.9	3272.5	6.1				8	0.1	3686.7	162.1	3413.9	4022.1	-174.6	2.1				2	0.2	7244.4	182.8	6961.1	7557.3	-66.4	2.3		deltaBLM + GFP-BLM-NN_ICRF_GFP-PICH-CEN-24 ana-like.czi
	Background	BLM	2	0.4	7775.9	320.4	6769	8371.1	6.1				9	0.1	6064.4	775	4036	7166.2	2.8	2				3	0.1	5146.5	398.7	4467	5890.3	102.6	1.9				1	0.1	1175.9	74.6	2011	2347	-90	1.5
		PICH	3	0.4	4476.8	535.4	3549.4	5891.8	5.7				10	0.1	3825.4	130.8	3529.7	4017.8	2.8	2				4	0.1	7589.1	104.7	7401.1	7808.5	102.6	1.9				2	0.1	8280.7	219.2	7891	8764.1	-90	1.5
		BLM	4	0.4	8963.8	500	7949.4	9706.1	5.7				11	0.1	5838	1467.5	3442.5	7826.4	4.6	0.8				5	0.1	5596.2	550.9	3984.5	6545.1	100.2	2				3	0.1	3621.7	362.1	2736.5	4104.5	-104	1.3
		PICH	5	0.1	6954.3	742.7	5723.5	8465	1.5				12	0.1	3763.1	122	3551	3913.8	4.6	0.8				6	0.1	8067.2	240.2	7540	8534.9	100.2	2				4	0.1	7010.2	179.4	6688.2	7318.9	-104	1.3
		BLM	6	0.1	11213.8	207	10824	11634.7	1.5															7	0.1	5136.3	357.8	4464.5	5907.4	-77.2	1.5				5	0.3	5722.4	1098.8	3128	8029.5	-84.4	4.6
		PICH	7	0.4	6384	567	5318.1	7767.7	5.5		deltaBLM + GFP-BLM-delta51_ICRF_GFP-PICH-CEN-27 metaphase-like.czi													8	0.1	7230.5	124.5	7097	7487.6	-77.2	1.5				6	0.3	9182.4	649.2	7883.5	10582.7	-84.4	4.6
		BLM	8	0.4	10288.9	661.4	8719	11265.1	5.5				1	0.2	4521.4	834.3	3023.3	5664.5	5	2.3															7	0.1	6592.2	862.5	5293	7885.1	-83.1	2.2
		PICH	9	0.1	6496.3	1247.7	5018	9030.6	2				2	0.2	4284.6	99.8	4054.5	4480	5	2.3		deltaBLM + GFP-BLM-delta13_ICRF_GFP-PICH-CEN-23 early ana.czi													8	0.1	9646.7	499.2	8745.8	10568.7	-83.1	2.2
		BLM	10	0.1	10629.7	1127.5	8999.5	12478.1	2				3	0.1	7681.1	773.3	5691.2	8659.4	18.8	1.6				1	0.1	2982.5	111.7	2762.1	3171.6	-29.3	2.1				9	0.2	4938.5	398	4238.8	5748.2	-77.2	2.5
		PICH	11	0.3	7216.1	651.4	5677	8686.7	4.4				4	0.1	4593.5	149.7	4217.2	4855.5	18.8	1.6				2	0.1	13385.7	162.6	13001.1	13647.7	-29.3	2.1				10	0.2	8868.6	192.3	8461.2	9226.3	-77.2	2.5
		BLM	12	0.3	10999	554.1	10186.7	12265.9	4.4				5	0.3	8379.4	1850.7	4517	11338.5	-3.4	3.8				3	0.3	6682.5	691.1	5507	8332.9	63.8	4.1				11	0.2	4866.5	596.7	3524.5	5949.3	-90.7	2.5
		PICH	13	0.3	7590.6	1799.9	4936.5	10987.6	4.7				6	0.3	4730.4	243.9	4376.1	5373	-3.4	3.8				4	0.3	13502.5	683.6	11784	14951.3	63.8	4.1				12	0.2	8185.1	373.1	7408.5	8804.6	-90.7	2.5
		BLM	14	0.3	10674.1	954.7	8907.7	12360.8	4.7				7	0.3	6678.5	1352.7	4753.4	9388.6	12.5	4.1				5	0.1	6549.9	651	5522.6	7504.5	64.5	1.6				13	0.4	4760.5	1248.7	2868.4	7842	4.6	5.7
		PICH	15	0.2	6470.4	841.3	4311	7853.6	2.7				8	0.3	4854.3	155	4527	5163.8	12.5	4.1				6	0.1	13456	263.4	12917.2	13830.4	64.5	1.6				14	0.4	8544.6	432	7917.9	9724.3	4.6	5.7
		BLM	16	0.2	9368.1	737.4	8005	10523.9	2.7				9	0.2	8156.8	1528.2	5451	10642.5	9.5	2.4				7	0.2	7597	1690.2	5117.6	10148.9	68	3.6
		PICH	17	0.3	6555.9	1082	4346.5	8894	4.3				10	0.2	5340.4	193.3	5073.5	5678.8	9.5	2.4				8	0.2	14522.8	805.6	13226.2	16068.1	68	3.6		deltaBLM + GFP-BLM-NN_ICRF_GFP-PICH-CEN-23 early ana.czi
		BLM	18	0.3	9256.3	790	7958.8	10778.6	4.3				11	0.1	13475.7	1061.9	10807	14303.8	-13.1	1				9	0.1	5774.4	501	5017.9	6440.1	-168.3	1				1	0.1	1600.3	54.4	1492.6	1706.5	-59	2.1
		PICH	19	0.1	5754.1	530.6	4319.5	6353	1.5				12	0.1	5370.2	188.5	5052	5658.7	-13.1	1				10	0.1	12346.4	483.3	11454	13029.4	-168.3	1				2	0.1	8586.8	440.7	7761	9304.7	-59	2.1
		BLM	20	0.1	8630.5	170.4	8252	9015.4	1.5				13	0.3	8881.4	2198.4	5428	12555.9	-3.2	4.6				11	0.2	6497.4	1082.6	4822.5	9191.8	78	3.3				3	0.1	3005.6	420.4	2326.4	3807.4	-93.9	1.9
		PICH	21	0.2	5656.6	962.6	4209.4	7381.6	3.4				14	0.3	5282.9	254.5	4865.1	5850.4	-3.2	4.6				12	0.2	14527.6	454.5	13409	15526.1	78	3.3				4	0.1	8256.8	389.4	7731	9024.9	-93.9	1.9
		BLM	22	0.2	8238.6	190.3	7807.4	8644	3.4				15	0.1	8572.4	2052.3	4991	12422.8	-17.6	2.1				13	0.2	6520.5	1286.3	4955.6	9159.8	61.9	3.2				5	0.1	2516.9	356.8	1899	3339.8	-109.6	2
		PICH	23	0.4	5666	483.5	4253.5	6473	6.6				16	0.1	5133.6	298.2	4764.7	5599.4	-17.6	2.1				14	0.2	14274.7	884.2	12593.5	15970.4	61.9	3.2				6	0.1	7675	275.2	7240.5	8253	-109.6	2
		BLM	24	0.4	8554.5	304.5	7525	9018	6.6				17	0.1	12076.1	1198.5	9158	13623.3	41.6	1.2				15	0.2	8207	1381	5525	11032	-104.6	3.7				7	0.1	4313.8	1051.5	2814	6415.7	83	2.1
													18	0.1	5560.9	246.2	5265.3	6032.2	41.6	1.2				16	0.2	14365.7	1024.4	11925	15741.1	-104.6	3.7				8	0.1	8944.3	620.5	7816.7	9957	83	2.1
	deltaBLM + GFP-BLM-WT_ICRF_GFP-PICH-CEN-44 early ana.czi												19	0.2	9888.6	1335.8	6206	11838.4	-10	2.4				17	0.2	7317.5	1351.3	5349	10848.5	67.1	3.6				9	0.1	5042.4	662.4	3883.5	6184.1	58.8	1.3
	Background	PICH	1	0.4	3431.1	705.7	2605	6075.2	6.4				20	0.2	5037.6	184.8	4761.9	5461.6	-10	2.4				18	0.2	14451.8	868.6	12738.6	15831	67.1	3.6				10	0.1	9435	231.1	9077.3	9845.7	58.8	1.3
	Background	BLM	2	0.4	6581.1	340.7	6017.2	7214.2	6.4				21	0.2	8363.5	785.5	6053.5	9622	-2.5	3				19	0.2	6607.3	333.5	5871.7	7147.5	64.5	2.3				11	0.3	3704.4	882.9	2184	5049.8	-97.6	5.1
		PICH	3	0.2	4755.2	1049.9	3648.1	7170.1	2.6				22	0.2	4588.6	166.2	4376.2	5014	-2.5	3				20	0.2	13140	842.4	11393.8	14312.3	64.5	2.3				12	0.3	9031.8	778.8	7532.2	10296.2	-97.6	5.1
		BLM	4	0.2	6851.9	478.8	6134	7753.6	2.6				23	0.2	8246.9	722.8	6875	9816.3	3.5	3.2				21	0.1	5673.6	316.9	5257.8	6421.7	55	2				13	0.3	4968.1	545.7	3335	6083	-96.8	4.4
		PICH	5	0.4	6098.1	1361.6	3320.5	8479	5.7				24	0.2	4666.3	125.7	4456	4890.5	3.5	3.2				22	0.1	13783.4	502.6	12754.5	14387	55	2				14	0.3	9386.4	546.1	8215	10508.1	-96.8	4.4
		BLM	6	0.4	7282.8	648.7	6062.5	8865.8	5.7				25	0.1	7520.4	1197.8	5757	10256	-162.5	1.3				23	0.1	5697.5	709	4845.1	6878.2	54.5	1.1				15	0.3	4557.3	1221.8	1901.8	6389.3	-96.2	4.5
		PICH	7	0.1	6530.7	548.5	5688.5	7625.9	1.9				26	0.1	4660.1	122.5	4487.5	4894.5	-162.5	1.3				24	0.1	13426.5	141.4	13000.5	13613.7	54.5	1.1				16	0.3	9638.2	1149.1	7454	11712	-96.2	4.5
		BLM	8	0.1	6917.8	185.3	6538.4	7409.2	1.9															25	0.3	6259.2	1071	4351	8334.1	70.4	4.1				17	0.1	4538.8	914	2695	6129.6	-99.2	2.2
		PICH	9	0.1	7037.7	836.5	5744.5	8120	1.5		deltaBLM + GFP-BLM-delta51_ICRF_GFP-PICH-CEN-26 metaphase-like.czi													26	0.3	12084.6	1321.5	9476	14141.9	70.4	4.1				18	0.1	8501.5	603.7	7426	9284.4	-99.2	2.2
		BLM	10	0.1	7240	298.2	6786	7811.6	1.5				1	0.1	3424.9	77.3	3196.8	3567.6	-15.3	2.2				27	0.1	3520.9	465.6	2948.8	4508.1	-118	1.7				19	0.2	4469.8	802.1	3499	5810.1	65.8	2.8
		PICH	11	0.1	6271.1	872.9	4655.5	7753.8	1.8				2	0.1	4478.6	80.9	4320	4628.2	-15.3	2.2				28	0.1	11512.4	340.4	10732	11942.8	-118	1.7				20	0.2	8398.8	570.7	7498.8	9343.3	65.8	2.8
		BLM	12	0.1	8182.1	765.1	6594.1	9028.6	1.8				3	0.2	8789.8	1546.3	6626	12006.8	-95.9	2.5				29	0.6	6452.9	1020.1	4384	8848.5	-29.9	8.7
		PICH	13	0.1	5158.1	739.7	4135.5	6450.4	2.2				4	0.2	4594.2	231	4064.5	4911.2	-95.9	2.5				30	0.6	14035.3	688.2	12320	15737.9	-29.9	8.7		deltaBLM + GFP-BLM-NN_ICRF_GFP-PICH-CEN-22 mid ana.czi
		BLM	14	0.1	7346.2	168.1	6941.4	7617	2.2				5	0.1	13801.5	2833.5	7123	16989	-78.7	1.7															1	0.1	1885.7	143.4	1664.2	2227	-83.6	2
		PICH	15	0.2	5440.4	791.7	3724.5	6871	3.4				6	0.1	5029	421	4283.5	5598.6	-78.7	1.7		deltaBLM + GFP-BLM-delta13_ICRF_GFP-PICH-CEN-21 mid ana.czi													2	0.1	6048.3	231.8	5691.5	6362.8	-83.6	2
		BLM	16	0.2	7271	474.6	6040.5	7997.9	3.4				7	0.2	9176.5	1684.6	5341	11698.7	-91.8	3.2				1	0.2	2374.1	89.4	2182.4	2577	-50.3	3				3	0.2	3863.5	622.4	1982	4840.4	-92.2	3.4
		PICH	17	0.2	5829.2	816.4	4781.1	7361.2	2.9				8	0.2	4852.1	266.5	4316.5	5484.2	-91.8	3.2				2	0.2	26950.4	589.3	30374.1	33019.6	-50.3	3				4	0.2	6321.2	403.1	5131	6756.6	-92.2	3.4
		BLM	18	0.2	7409.2	575.5	6421.5	8443.6	2.9				9	0.2	9818	3226	6212	15322	-88.3	2.2				3	0.3	4554.1	1084	2743.1	6530.5	66.3	4.7				5	0.1	3136.8	468.5	2208.2	3869.5	-86.4	1.6
		PICH	19	0.1	6126.7	1006.3	4054	7980.4	1.7				10	0.2	4984.8	420.9	4409	5839.8	-88.3	2.2				4	0.3	27247.1	3520.7	21097.2	32449.5	66.3	4.7				6	0.1	5996.2	375.2	5219	6442.5	-86.4	1.6
		BLM	20	0.1	7791.3	355.9	6920	8152.7	1.7				11	0.1	9035.9	2399	4931.8	12042.6	-87.3	1.4				5	0.1	3919.5	551.5	3021	5022.8	-120.5	1.3				7	0.1	3903.9	429.7	2884.5	4487.2	-48.5	1.1
		PICH	21	0.3	4368.8	684.8	3405	5865	4.1				12	0.1	4872.4	589.2	4049.7	5756.4	-87.3	1.4				6	0.1	27106	711	25737.5	28210.9	-120.5	1.3				8	0.1	6479.2	116.4	6270.5	6681.9	-48.5	1.1
		BLM	22	0.3	7093.8	402.1	6200	7753.4	4.1				13	0.1	6682	555.6	5763	8067	76	1.5
		PICH	23	0.1	5949.9	1148.4	3777	7303.3	1				14	0.1	4225	173.5	4012	4522.5	76	1.5		deltaBLM + GFP-BLM-delta13_ICRF_GFP-PICH-CEN-20 early ana.czi											deltaBLM + GFP-BLM-NN_ICRF_GFP-PICH-CEN-20 ana-like.czi
		BLM	24	0.1	7554.5	310.5	6892.5	7858.3	1				15	0.1	7959.1	893.1	6024.5	9323	-103.6	2.1				1	0.1	2992.9	255.4	2697.8	3492	-84.4	1.7				1	0.2	1543.5	207	1681.8	2652.8	-90	3.8
		PICH	25	0.1	4535.9	468.9	3390	5231.7	1				16	0.1	4180	259.8	3836.5	4698.1	-103.6	2.1				2	0.1	8085.4	214.8	7719.8	8441.1	-84.4	1.7				2	0.2	14651.7	641.3	12799.5	15997.2	-90	3.8
		BLM	26	0.1	6851.3	106.2	6655	7019.6	1				17	0.1	9576	1090.3	7574	11304.3	-100.3	1.8				3	0.1	10379	1445.6	8344	13113.9	52.7	1.6				3	0.3	3160.6	370.7	2295.2	3675.3	-77.3	4
		PICH	27	0.1	7531.5	891.8	5462	8365.1	0.7				18	0.1	4490.9	217.2	4136.3	4917.5	-100.3	1.8				4	0.1	8892.4	478.6	8008.3	9504.9	52.7	1.6				4	0.3	14369.5	984.5	11868.8	15714	-77.3	4
		BLM	28	0.1	7422.9	851.6	6070	8244.9	0.7				19	0.1	11105.8	980.5	9161.5	12626.8	67.4	1.3				5	0.1	10257.4	1161.8	8487	12540.2	85.6	0.8				5	0.2	3832.8	681.1	2941	5546.5	-88.2	3
													20	0.1	4633.1	161.2	4375	4891.6	67.4	1.3				6	0.1	8757.7	265.4	8200	9096	85.6	0.8				6	0.2	15855.9	898.6	13425.5	17166.9	-88.2	3
	deltaBLM + GFP-BLM-WT_ICRF_GFP-PICH-CEN-43 late ana.czi												21	0.1	8353.9	1256.8	5393.8	10229.3	-85.2	1.6				7	0.2	9666.6	2703.5	5687.6	15063.2	52.1	3.2				7	0.2	3628.4	625.5	2381.4	4729.2	-94.8	3.1
	Background	PICH	1	0.3	1739.3	79.3	1585.3	1899.3	4.1				22	0.1	4523.8	231.6	4101.8	4941.6	-85.2	1.6				8	0.2	8674	861.8	7590.7	10572.9	52.1	3.2				8	0.2	15554.8	1025.9	13077	16593.8	-94.8	3.1
	Background	BLM	2	0.3	3393.6	229.4	2763.9	3737.4	4.1				23	0.2	7532.9	1487.8	5468.5	10250	-90	2.2				9	0.2	9709.5	1487.2	7440.7	12325.6	42.2	3.3				9	0.1	3959.3	426.9	2910	4518.5	-90	1.3
		PICH	3	0.3	4394.9	966.6	3023.8	6670.1	3.8				24	0.2	4149.8	257.7	3819.2	4650.1	-90	2.2				10	0.2	8014.1	575.6	7054	9300.3	42.2	3.3				10	0.1	15886.7	412.6	15053	16495	-90	1.3
		BLM	4	0.3	3759.9	391	3128.5	4485.3	3.8				25	0.2	6055.4	1026	4022	7821.9	89.4	3.2				11	0.2	9661	2006.2	7310	15190.1	-161.6	2.8				11	0.1	3876.1	507.7	2632.5	4500.3	-97.4	1.5
		PICH	5	0.1	5225.3	499	4046.8	5894	1.1				26	0.2	3845.8	238.5	3481.3	4221.9	89.4	3.2				12	0.2	7945.7	451.4	6869	8883.3	-161.6	2.8				12	0.1	12821.1	933.4	11516	14053.2	-97.4	1.5
		BLM	6	0.1	3957.2	233.3	3526.6	4264	1.1				27	0.1	8744.1	1476.3	6547.9	10900	-138.2	1.7				13	0.1	8578.5	783.7	7530.7	10036	46.9	2.1
		PICH	7	0.2	5401.2	706.9	4137.1	6794	3.1				28	0.1	4503.2	172.1	4226.9	4832	-138.2	1.7				14	0.1	7639.2	286.6	7091	8146.9	46.9	2.1		deltaBLM + GFP-BLM-NN_ICRF_GFP-PICH-CEN-19 late ana.czi
		BLM	8	0.2	4249.1	321.8	3845.9	4941.2	3.1															15	0.1	6867.2	1248.8	4876	9191.2	47.4	2.2				1	0.1	1985.2	138.1	1737.2	2252.5	-38.7	1.7
		PICH	9	0.2	4288.4	791.3	3271.6	6396.2	3		deltaBLM + GFP-BLM-delta51_ICRF_GFP-PICH-CEN-20 meta-like.czi													16	0.1	7165	398	6675.6	8149.6	47.4	2.2				2	0.1	7565.4	625.2	6224.5	8276.3	-38.7	1.7
		BLM	10	0.2	3952	184.6	3712.2	4427.2	3				1	0.2	3661.5	238.8	3114	4081.7	-110.7	2.6				17	0.1	7034.3	585.7	6144.3	7827.8	-146.9	0.9				3	0.1	5324.1	1235.6	2987.5	7360.6	-48.5	1.9
		PICH	11	0.1	4075.6	627.6	2868	5218.8	1.7				2	0.2	4985	341.1	4506.5	5581.7	-110.7	2.6				18	0.1	8093.6	424.5	7499.5	8743.9	-146.9	0.9				4	0.1	8338.4	415.5	7414.5	9073.1	-48.5	1.9
		BLM	12	0.1	3713	366.3	3046	4149.6	1.7				3	0.2	6264.5	1095.3	4311	8194.9	-97.8	2.4				19	0.2	9938.4	1981.2	6914.4	14716.8	136.2	3.2				5	0.1	5412.4	1132.8	3765.4	7401.2	156.9	1.7
													4	0.2	4989.9	203.4	4508	5383.6	-97.8	2.4				20	0.2	8722.8	761.2	7275	10718	136.2	3.2				6	0.1	8393.6	319.1	7775.3	9004.9	156.9	1.7
	deltaBLM + GFP-BLM-WT_ICRF_GFP-PICH-CEN-40 mid ana.czi												5	0.1	5145.8	618.5	3549.5	5822	-100.7	1.2				21	0.3	8366.7	1936.2	4748.6	12913.6	-72.4	4.7				7	0.2	4369	1220	3171	7780.6	-45	2.8
	Background	PICH	1	0.2	2153.3	106.5	1937	2411.9	2.7				6	0.1	4792	97.4	4596.7	4965.3	-100.7	1.2				22	0.3	8106.4	862.6	6633.9	10356.1	-72.4	4.7				8	0.2	7783.5	602	6674.5	8765.4	-45	2.8
	Background	BLM	2	0.2	10690.2	254.7	10296.3	11317.2	2.7				7	0.2	4882	248.8	4302.9	5430.1	-109.1	2.5				23	0.1	10022.3	2373.3	6030	13677.3	39.2	1.6				9	0.1	4274.4	396.5	3657.2	4978.9	-52.7	1.6
		PICH	3	0.2	3551.2	628.9	2448.5	4731.3	3.7				8	0.2	5070.7	242.9	4654.9	5442.3	-109.1	2.5				24	0.1	8684	985.7	7161	10296.7	39.2	1.6				10	0.1	8432.6	215.4	7916.5	8745.7	-52.7	1.6
		BLM	4	0.2	11893.3	495.7	10896.2	12723.1	3.7				9	0.1	5154.3	688.2	3458	6228.5	-96.2	2.1
		PICH	5	0.4	3898.1	501.1	2713.5	5329.4	5.3				10	0.1	4669.3	188.9	4357.4	5064.2	-96.2	2.1		deltaBLM + GFP-BLM-delta13_ICRF_GFP-PICH-CEN-17 ana-like.czi											deltaBLM + GFP-BLM-NN_ICRF_GFP-PICH-CEN-16 early ana.czi
		BLM	6	0.4	12007.1	550.7	10865.3	12924.3	5.3				11	0.1	5484.8	1000.2	4343	7263	-70	0.8				1	0.1	2349.4	125.6	2144.6	2616.7	43.6	1.9				1	0.1	1948.1	273.4	1620.8	2515.3	-69.8	1.7
		PICH	7	0.2	3308.7	417.3	2604.3	4073.9	2.3				12	0.1	4976.3	45.6	4900.2	5057	-70	0.8				2	0.1	11787.8	364.4	11104.4	12412.1	43.6	1.9				2	0.1	10196.2	423.2	9518	10896.4	-69.8	1.7
		BLM	8	0.2	12071.9	623.2	10565	12900.6	2.3				13	0.1	5458	661.7	4076	6423.7	-53.1	1.3				3	0.2	5412.5	1098.1	3414	6977.4	79	2.4				3	0.2	3423.8	625.3	2325.5	4665.4	-130.8	3.4
													14	0.1	5294.2	261.3	4780	5656	-53.1	1.3				4	0.2	11788.3	1232.4	9729.6	13627.2	79	2.4				4	0.2	8903.6	445.8	8082.2	9631.8	-130.8	3.4
	deltaBLM + GFP-BLM-WT_ICRF_GFP-PICH-CEN-39 late ana.czi												15	0.2	4479.3	308.9	3664	4909.4	-103.2	2.3				5	0.1	3455.1	190.3	2850	3838.5	77.2	1.5				5	0.2	3951.7	1022	2771.2	6227.1	-125.3	3.5
	Background	PICH	1	0.2	2576.9	241.6	2330	3236.6	3.7				16	0.2	4338.5	74.3	4174	4504.5	-103.2	2.3				6	0.1	10971.6	322.7	10403	11489.5	77.2	1.5				6	0.2	10123	589.5	8894	11282.1	-125.3	3.5
	Background	BLM	2	0.2	10862.8	300.5	10307.6	11619	3.7				17	0.2	5285.7	1010	3571	6804.2	79.2	3.1				7	0.2	5624	1315.8	2916	7354.6	85.1	3.1				7	0.1	5722.6	1218.6	4139.5	7892.7	-118.1	1.6
		PICH	3	0.3	4562.1	925.5	3244.4	6960	4.9				18	0.2	4877.4	195	4386.7	5173.2	79.2	3.1				8	0.2	12819.6	989	10465	14728	85.1	3.1				8	0.1	11741.3	352	10800	12181.8	-118.1	1.6
		BLM	4	0.3	11843.3	1010.8	9770.4	13154	4.9															9	0.1	6121.8	360.8	5310	6757.9	-105.9	0.9				9	0.2	5716.2	1708.8	3920.3	9108.4	45	2.3
		PICH	5	0.2	3856	1051.9	2966.7	7069.5	3.5		deltaBLM + GFP-BLM-delta51_ICRF_GFP-PICH-CEN-19 ana-like.czi													10	0.1	11139	393.2	10511.3	11746.8	-105.9	0.9				10	0.2	10945	682.4	9847	11962.7	45	2.3
		BLM	6	0.2	11788.5	552.6	10691.3	12542.5	3.5				1	0.1	4033.6	198	3719.1	4430.2	-12.5	2.1				11	0.3	5647.7	541.4	4400.5	6531.1	75.3	3.8				11	0.1	3474.8	321.3	2856	4162.8	-121	2.1
													2	0.1	4897	75.1	4762	5039.9	-12.5	2.1				12	0.3	11716.6	940	10066.1	13159.8	75.3	3.8				12	0.1	12265.9	759.5	11074.9	13525.8	-121	2.1
	deltaBLM + GFP-BLM-WT_ICRF_GFP-PICH-CEN-35 mid ana.czi												3	0.1	9168.8	582.9	8058.8	10474.9	16.1	2.2				13	0.1	4700.4	947.5	2953	6625.2	64.2	2.1				13	0.2	3282	448.1	2590.8	4323.2	-146.1	2.3
	Background	PICH	1	0.2	3583.7	310.6	3090.1	4412.3	3.5				4	0.1	4977.1	191.3	4347	5303.6	16.1	2.2				14	0.1	10572.4	809.4	9306	11651	64.2	2.1				14	0.2	9173.2	357.4	8459.5	9673.9	-146.1	2.3
	Background	BLM	2	0.2	17355.6	475.4	16484	18182.7	3.5				5	0.1	5633.2	1389.3	4244.3	8827	-178.6	1.4				15	0.3	5256.4	463.6	4138	6119.8	48.8	4.1
		PICH	3	0.5	4994.1	505.5	3804.2	6118	7.2				6	0.1	4520.6	116.2	4179.5	4739.2	-178.6	1.4				16	0.3	11797.4	667.3	10565.8	13023	48.8	4.1		deltaBLM + GFP-BLM-NN_ICRF_GFP-PICH-CEN-15 mid ana.czi
		BLM	4	0.5	17405.8	1121.8	14621.7	19019.2	7.2				7	0.1	9429.2	903	7708.8	11235.1	6.6	1.7				17	0.1	3955.3	560.4	3182.7	4842.3	-99.5	1.2				1	0.2	1852.1	84.8	1726.8	2079	-35.7	2.3
		PICH	5	0.2	5716.1	1265.3	4240.7	9076.5	3				8	0.1	5235.4	339.5	4815.2	5841.2	6.6	1.7				18	0.1	9212.1	312.9	8687.5	9791.2	-99.5	1.2				2	0.2	5578.2	179.3	5201	5872.7	-35.7	2.3
		BLM	6	0.2	18709.4	615.4	17573.3	19949.7	3				9	0.1	7916.6	1528.5	5418	10380.6	13.7	1.5				19	0.1	5031.1	695.1	4096	6532	66	1.9				3	0.1	3682.1	451.5	2706.2	4257.4	-42.8	1.8
		PICH	7	0.3	5097.1	1030.6	3893.1	7829.1	4.4				10	0.1	5231.9	205.2	4866	5450	13.7	1.5				20	0.1	10874	897.1	9287.7	11904	66	1.9				4	0.1	5489.6	165.4	5223	5845.8	-42.8	1.8
		BLM	8	0.3	17753.2	1007.1	16442.8	21761.8	4.4				11	0.2	9445.2	1881.7	6032.2	12248.6	6.4	2.9															5	0.3	4486.3	1000.8	2589.5	6779.2	-41.2	5.1
													12	0.2	5049.3	153.8	4823.7	5519.8	6.4	2.9		deltaBLM + GFP-BLM-delta13_ICRF_GFP-PICH-CEN-15 mid ana.czi													6	0.3	5454.3	819.8	4225.7	6886.9	-41.2	5.1
	deltaBLM + GFP-BLM-WT_ICRF_GFP-PICH-CEN-34 mid ana.czi												13	0.2	7516.8	891.1	6469.2	9423.1	-177.3	3.5				1	0.2	3149.5	142.9	2829	3409	-129.2	2.3				7	0.3	4341.8	832.8	3032	6165	-42.5	4.2
	Background	PICH	1	0.3	4323.9	604.5	3605	5704.3	4.7				14	0.2	4983.5	114.8	4729.4	5264.5	-177.3	3.5				2	0.2	11628.7	256.8	11083	12027.3	-129.2	2.3				8	0.3	5690.1	605.5	4521	6694.7	-42.5	4.2
	Background	BLM	2	0.3	12471.3	1293	10664	14774	4.7				15	0.2	8513.3	954.2	6955.5	10545.5	-172.6	3				3	0.2	7293	1451.8	5043.7	10245.1	-132.6	3.3				9	0.2	6167.5	627.1	4959.2	7557.9	-41.1	3.1
		PICH	3	0.3	4847.2	737.5	3847.1	6856.9	4.3				16	0.2	5233.4	225.8	4624	5566.6	-172.6	3				4	0.2	12463.3	1347.1	10309	14507.4	-132.6	3.3				10	0.2	5765.5	645.7	4530	6707.8	-41.1	3.1
		BLM	4	0.3	13080.6	398	12161	13633.7	4.3				17	0.2	8705.8	1016.9	6549.5	10838.8	-171	2.7				5	0.2	6433.6	639.9	4997	7866.7	-160	2.3				11	0.2	5859.5	794	4312	7134.8	-44.4	2.3
		PICH	5	0.5	4962.6	679	3474.1	6017.4	6.9				18	0.2	5224.7	222	4705	5542.2	-171	2.7				6	0.2	11681.5	368.5	10867	12307.9	-160	2.3				12	0.2	5372.4	373.9	4656.6	5977.9	-44.4	2.3
		BLM	6	0.5	14237.8	946.2	12301.9	15673.7	6.9				19	0.2	8706.2	941	6548	9904.5	13.6	2.9				7	0.1	6576.7	900.1	5183	7891.7	-152.4	1.7				13	0.2	5507.8	1192.4	3587.8	7799.7	-43.4	3.3
		PICH	7	0.3	5031.4	1627.8	3605.8	11171	5.2				20	0.2	5173.9	328.4	4399	5643.8	13.6	2.9				8	0.1	12355.9	489.2	11320	13002.4	-152.4	1.7				14	0.2	5651.5	434	4795.5	6254.3	-43.4	3.3
		BLM	8	0.3	14569.9	931.9	13071.8	17369.6	5.2				21	0.2	9483.7	1758.8	5602.5	12204.7	13.7	3				9	0.2	7091.8	701.6	5894.5	8688	49.1	2.6				15	0.1	6718.4	612	5042.5	7766.3	-36.5	2
		PICH	9	0.2	6149.6	1014.8	4381.8	7685	3.3				22	0.2	5386.1	322.5	4536.5	5976.9	13.7	3				10	0.2	13041.8	473	12012	13906.7	49.1	2.6				16	0.1	5932.5	233.3	5372.5	6253.8	-36.5	2
		BLM	10	0.2	15058.6	1715	12533.1	17917.8	3.3				23	0.1	7685.7	1027.2	5885	9703.3	-176.4	1.6
		PICH	11	0.3	5303.4	371.5	4554	5962	5.1				24	0.1	5051.3	178.9	4634.4	5293.1	-176.4	1.6		deltaBLM + GFP-BLM-delta13_ICRF_GFP-PICH-CEN-09 mid ana.czi											deltaBLM + GFP-BLM-NN_ICRF_GFP-PICH-CEN-14 ana-like.czi
		BLM	12	0.3	13579.5	496.7	12206.7	14207.3	5.1				25	0.2	6447.1	729.2	4854	8273.2	15.2	3.5				1	0.1	1785.6	78.7	1651	2013	180	1.3				1	0.1	1782.9	85.9	1663	1950.8	-64	1.4
		PICH	13	0.2	4771.2	480.6	3874	5933.5	3.6				26	0.2	4981.3	243.5	4350	5414.3	15.2	3.5				2	0.1	12130	446.1	11416	12742	180	1.3				2	0.1	10503.2	275.9	9960	11012.7	-64	1.4
		BLM	14	0.2	12538.2	1093.6	10672.4	14106.6	3.6															3	0.3	3161.8	928.9	1933.5	5035.4	68.7	5				3	0.3	4290.3	770	2914.2	5786.7	-22.2	4.7
											deltaBLM + GFP-BLM-delta51_ICRF_GFP-PICH-CEN-18 mid ana.czi													4	0.3	13268.8	831.5	10657	14534.7	68.7	5				4	0.3	10434.3	440	9142	11147.5	-22.2	4.7
	deltaBLM + GFP-BLM-WT_ICRF_GFP-PICH-CEN-32 late ana.czi												1	0.2	2998.4	315.8	2255.3	3495.8	-117	3.7															5	0.3	4161.6	543.5	2800	4946.2	-25.3	3.9
	Background	PICH	1	0.2	3442.4	344.8	2852.1	4230	2.8				2	0.2	7268.1	223.7	6302	7694.9	-117	3.7		deltaBLM + GFP-BLM-delta13_ICRF_GFP-PICH-CEN-08 early ana.czi													6	0.3	10717.2	730.7	9364.2	11800	-25.3	3.9
	Background	BLM	2	0.2	12966.8	721.1	11797.1	13837.5	2.8				3	0.1	3270.8	287.7	2653	3680.5	-106.2	2.1				1	0.2	2717.2	168.8	2445	3143.4	153.7	3.1				7	0.2	4957.6	1372.2	3123.2	7676.4	155.3	2.6
		PICH	3	0.1	4565.8	534.3	3501	5344.3	1.8				4	0.1	6063.8	132.3	5779	6356.4	-106.2	2.1				2	0.2	19069.4	1216.1	19223.8	23392.2	153.7	3.1				8	0.2	11422.1	539.5	10425.7	12281.9	155.3	2.6
		BLM	4	0.1	13580.2	315.1	13070.1	14011.7	1.8				5	0.1	4662.9	462	3416	5399.5	-112	2.2				3	0.1	3881.9	369.3	3072	4431.6	-43.9	1.2				9	0.1	5972.3	986.1	4653	7716.2	168.4	1.5
		PICH	5	0.3	5649.4	1383.3	3735.7	8919.6	4				6	0.1	7001.8	301.1	6552	7606.2	-112	2.2				4	0.1	20261.6	570.7	19142	20925.5	-43.9	1.2				10	0.1	11618.8	553.1	10739.5	12629.1	168.4	1.5
		BLM	6	0.3	13738.5	809.5	11870.5	15305.6	4				7	0.1	4820.1	833.7	3509.5	6097.4	-123.2	2				5	0.2	4197.6	765.6	2757.8	5247.7	-23	2.3				11	0.2	4959.6	492.8	3993.4	5883.5	-38.4	2.6
		PICH	7	0.2	6080.6	982.2	4893.9	8182.7	3.4				8	0.1	7383	109	7160.3	7673.8	-123.2	2				6	0.2	20046.6	752.8	18867.2	21350	-23	2.3				12	0.2	9822.4	439.5	9261.8	10628.5	-38.4	2.6
		BLM	8	0.2	13756.5	866.3	12023	14758.5	3.4				9	0.5	4451.8	720.2	3224.5	6528.5	64.7	7.8				7	0.1	4256.1	460.4	3519.5	5004.5	132.6	1.7				13	0.2	3969.2	501.8	2869.5	5030.5	-22.5	3.7
		PICH	9	0.1	5944.6	1755.2	4446.3	10890.2	2				10	0.5	7104.5	482.8	6210.2	8238.6	64.7	7.8				8	0.1	20611.3	932	19272.6	22316	132.6	1.7				14	0.2	10388	386.3	9288.6	11114.8	-22.5	3.7
		BLM	10	0.1	13356.9	1312.3	11529.1	15986.7	2				11	0.2	4402.3	916.5	2854	5717.3	-119.7	2.4				9	0.1	3602.2	669.6	2877.7	4933	-19.4	1.8				15	0.1	4646.8	1064.6	3046.2	6177.1	-1.5	1.2
		PICH	11	0.1	5786.3	1171.5	3950	8012.7	2.1				12	0.2	7338.3	414.9	6588	8011.8	-119.7	2.4				10	0.1	16854.3	757	15420.7	17910.3	-19.4	1.8				16	0.1	10220.3	617.1	9130.4	10900.6	-1.5	1.2
		BLM	12	0.1	15346.2	1094	12988	16965	2.1				13	0.2	4807.6	447.2	3876	5620.1	58.3	3.4				11	0.1	4599.4	887.7	3556.5	6160.9	-14.9	1				17	0.2	4413.6	738.1	3410.1	6488.1	-35	2.7
		PICH	13	0.2	5044.7	740.1	3772.3	6382.1	2.9				14	0.2	7125.6	205.5	6611.4	7412.5	58.3	3.4				12	0.1	16832.1	423.7	16044	17410.5	-14.9	1				18	0.2	10176	249.7	9789.8	10846	-35	2.7
		BLM	14	0.2	14909	329.2	14302.3	15641.2	2.9				15	0.1	5095.8	487.8	3861	6087.4	-106.7	2				13	0.1	5360.6	650.6	4047	6189.2	-22.2	0.9				19	0.4	4808.3	853.9	3325.6	7204.2	-113.7	5.3
													16	0.1	6890.7	365	6128	7386.1	-106.7	2				14	0.1	16744.4	484.4	15906	17344.4	-22.2	0.9				20	0.4	10598.1	526.4	9671.5	11906.5	-113.7	5.3
	deltaBLM + GFP-BLM-WT_ICRF_GFP-PICH-CEN-31 mid ana.czi																							15	0.1	3749.4	400.6	2681.8	4292.8	-10.3	1.5
	Background	PICH	1	0.3	3329.2	314.3	2784.6	4143.2	3.8		deltaBLM + GFP-BLM-delta51_ICRF_GFP-PICH-CEN-17 mid ana.czi													16	0.1	15968	447.1	15456.9	16989	-10.3	1.5		deltaBLM + GFP-BLM-NN_ICRF_GFP-PICH-CEN-12 early ana.czi
	Background	BLM	2	0.3	10523.1	476.9	9522	11239	3.8				1	0.2	3462.6	387.7	2811.2	4084.8	23.3	2.3															1	0.1	1881.7	77	1733	1997.9	156.3	1.5
		PICH	3	0.1	5573	977.3	3507	7073.6	2.1				2	0.2	7556.9	277.4	6892	8016.3	23.3	2.3		deltaBLM + GFP-BLM-delta13_ICRF_GFP-PICH-CEN-07 mid ana.czi													2	0.1	3303.7	64.6	3132.6	3441.6	156.3	1.5
		BLM	4	0.1	11119.2	536.6	9723	12123.6	2.1				3	0.2	7598.6	822.9	5343	8739.2	-166.2	2.3				1	0.1	2359.4	112.4	2112.3	2558	-78.1	1.7				3	0.1	4633.6	1228.9	2931	6369.6	-160.6	1.9
		PICH	5	0.2	5490.7	950.6	3534	7300.7	2.4				4	0.2	8048.4	504	6524	8571.2	-166.2	2.3				2	0.1	6590.1	137.5	6238.5	6874.1	-78.1	1.7				4	0.1	3364.4	100	3136.2	3535.5	-160.6	1.9
		BLM	6	0.2	12287.9	553.8	11119	13263.8	2.4				5	0.1	4406.6	334	3545.5	4730.7	-135	1.1				3	0.1	4906.1	700.2	3571	5636.2	-48.4	0.8				5	0.2	5051.9	411.5	4175	5886.6	-137.5	3.1
		PICH	7	0.2	6121.9	915.8	5008.4	8227	3.1				6	0.1	7435.8	189.9	6985	7695.5	-135	1.1				4	0.1	6214.4	65.7	6115.2	6337.7	-48.4	0.8				6	0.2	3295.1	83.3	3152.6	3482.3	-137.5	3.1
		BLM	8	0.2	12367.4	395.5	11760	13036.7	3.1				7	0.2	4776.4	565.5	3790.9	6105.9	29.2	3.5				5	0.1	4074	951.3	2807	5606.8	-82.7	1.8				7	0.1	7596	1415.4	5024	9505.3	-132.2	1.4
		PICH	9	0.1	6158	628.3	5160	7200.8	1.8				8	0.2	7752.5	338.8	7082.3	8250.3	29.2	3.5				6	0.1	5808.9	401.4	5004	6398.1	-82.7	1.8				8	0.1	3345	80.9	3188.3	3481.4	-132.2	1.4
		BLM	10	0.1	12824.2	291.2	12346	13307.2	1.8				9	0.2	6137.7	1337	4324	9469.1	-172	2.3				7	0.1	4302.7	715.6	3131.5	5551.4	100.2	1.7				9	0.1	6777.3	846.1	4609	7577.7	-157.2	1.1
		PICH	11	0.4	5550.1	588	4050	6626.7	5.3				10	0.2	7487.6	601.6	6438	8379.1	-172	2.3				8	0.1	7042.5	290.5	6186	7406.2	100.2	1.7				10	0.1	3524.1	65.6	3360.6	3636.3	-157.2	1.1
		BLM	12	0.4	12911.9	632.1	10503	13807.6	5.3				11	0.1	5895.7	1716.1	3631.9	8533.3	14.8	1.8				9	0.1	5207.5	866.8	3388.5	6714.4	-83.3	2.2				11	0.2	4024.2	1375.9	2811	6993.3	-166.1	3.4
		PICH	13	0.2	5660.2	617.5	4285	6598	2.3				12	0.1	7420.9	554.6	6519.7	8436.8	14.8	1.8				10	0.1	6431.2	410.8	5481	7046.6	-83.3	2.2				12	0.2	3358.7	97.7	3188.3	3564.5	-166.1	3.4
		BLM	14	0.2	11089	417.2	10065	11636.6	2.3				13	0.1	5376.8	647.1	4284.2	6286.9	-174.9	1.8				11	0.1	6055.4	1060.9	3894.5	7167.6	-65.8	0.7				13	0.2	5208.8	1264.9	3666	7597.1	-145.1	2.9
		PICH	15	0.4	6070	990.8	3917.7	8365.2	5.4				14	0.1	7657.2	462.5	6834	8383.2	-174.9	1.8				12	0.1	6599.9	317.3	6049.2	6958.8	-65.8	0.7				14	0.2	3422.1	120	3215.4	3662	-145.1	2.9
		BLM	16	0.4	11448.1	1171.6	9239.5	13230.4	5.4				15	0.2	6033.9	879.3	4776.2	8522.6	-172.2	2.6															15	0.1	6769.4	1567.1	4240	8654.9	-166.6	1.4
		PICH	17	0.2	4972.9	541.8	4090	6306.4	3.4				16	0.2	7530.1	606.2	6361.2	8686.3	-172.2	2.6		deltaBLM + GFP-BLM-delta13_ICRF_GFP-PICH-CEN-06 early ana.czi													16	0.1	3146	73.4	3003	3268.8	-166.6	1.4
		BLM	18	0.2	11814.2	361.5	11129	12596.8	3.4															1	0.2	1807.2	91	1595.8	2019.5	-121.2	3.4				17	0.3	5890.1	1469.1	3666.9	9380.7	-68.2	3.9
		PICH	19	0.2	4832.7	788.6	3587	6430.3	2.8		deltaBLM + GFP-BLM-delta51_ICRF_GFP-PICH-CEN-16 metaphase-like.czi													2	0.2	9505.5	344.4	9434.2	10735.9	-121.2	3.4				18	0.3	3415.4	100.4	3240.6	3719.5	-68.2	3.9
		BLM	20	0.2	12082.3	348.1	11163	12736.5	2.8				1	0.2	4702.6	412.7	4058.2	5411.4	-69.5	2.9				3	0	3743.8	361.6	2945	4062.4	140.9	0.7
		PICH	21	0.2	4844.9	846.6	3216	6325.6	3.5				2	0.2	4678.3	76.1	4508.5	4853.3	-69.5	2.9				4	0	8341.4	197.7	8099.2	8710	140.9	0.7		deltaBLM + GFP-BLM-NN_ICRF_GFP-PICH-CEN-11 early ana.czi
		BLM	22	0.2	11363.1	489.9	10118	12158.8	3.5				3	0.3	7085.2	769.7	5329.5	8849.6	-65.7	4.3				5	0.1	3885.2	294.9	3279.5	4370.5	-29.6	1.9				1	0.2	1338.8	72.7	1595.7	1937.9	-159.3	2.3
													4	0.3	5014.3	175	4716.7	5438.4	-65.7	4.3				6	0.1	7989	290	7344.2	8498.2	-29.6	1.9				2	0.2	16194.3	389.9	15229.5	16911	-159.3	2.3
	deltaBLM + GFP-BLM-WT_ICRF_GFP-PICH-CEN-30 late ana.czi												5	0.2	10008.3	1735.6	6571	13520.7	110.7	3.1				7	0.3	3111.6	610.8	2209	4364.3	-37.4	4.7				3	0.2	4267	691.9	2869	5640.5	-114.5	2.8
	Background	PICH	1	0.2	1988.7	85.1	1763	2177.8	3.7				6	0.2	4816.5	189.8	4533	5149.6	110.7	3.1				8	0.3	8558.2	390.3	7899.5	9392.3	-37.4	4.7				4	0.2	17702.7	1066.6	14937	18865.5	-114.5	2.8
	Background	BLM	2	0.2	13049.6	264.9	12613.5	13794	3.7				7	0.2	10132.7	427.9	8935.8	11023.6	-51	2.4				9	0.1	5137	773.1	3775.8	6362.5	145.8	1.8				5	0.1	3672.2	310.5	2925.5	4241.9	-117	1.9
		PICH	3	0.4	3203.4	518	2471.4	4829.7	6.3				8	0.2	4863.8	130.6	4498.4	5114.9	-51	2.4				10	0.1	10135.1	502.1	9294.5	11076.4	145.8	1.8				6	0.1	15425.9	1650.5	12804.8	17896.5	-117	1.9
		BLM	4	0.4	13771.4	865.4	11448.3	14975.7	6.3				9	0.2	8361.3	1085.6	6449	10059.8	99	2.5				11	0.1	5445.7	976.5	3581	7526.7	-37.6	2.1				7	0.2	3545.3	882.9	2234.9	5237.4	71.9	3.5
		PICH	5	0.2	3100.7	571.3	2425.8	4255.3	3.4				10	0.2	4861.3	127.7	4601	5158	99	2.5				12	0.1	10076.1	363.4	9017.8	10453.8	-37.6	2.1				8	0.2	16876.2	1813.6	13342	19306.4	71.9	3.5
		BLM	6	0.2	13249.8	1516.8	10543	16185.4	3.4				11	0.2	9541	939.5	6930	11259.6	-65	2.6				13	0.1	6039.9	1037.6	4454.5	7712.3	-13.3	1.8				9	0.2	3530.8	371.8	3038.9	4467.2	21.8	3.2
		PICH	7	0.1	4021	415.5	3262	4702.4	1				12	0.2	5082.1	93.6	4888.2	5250.6	-65	2.6				14	0.1	9604.6	422.7	8550	10258.2	-13.3	1.8				10	0.2	17588.7	858.9	15272	18613.6	21.8	3.2
		BLM	8	0.1	14792.5	797.1	13045	15686.8	1				13	0.3	7235	746.7	5891.5	9044.8	-67.1	4.3				15	0.3	3940.5	950.1	2539.3	5431.7	-32.5	4.5				11	0.2	3421.9	364.6	2719.3	4246.7	-119.9	2.7
													14	0.3	5036.4	185.2	4718.7	5436.5	-67.1	4.3				16	0.3	8966.8	782.4	7839.1	10650.1	-32.5	4.5				12	0.2	16398.7	1256.9	14169.9	18298.9	-119.9	2.7
	deltaBLM + GFP-BLM-WT_ICRF_GFP-PICH-CEN-29 mid ana.czi												15	0.1	8001.8	959.2	5561.5	9205.3	-79	2.2				17	0.2	5220	714.2	4055	6956.5	-37.2	2.4				13	0.1	3198.6	434.6	2730	4379.2	-112.4	2.2
	Background	PICH	1	0.2	2678.8	162.7	2313.8	2998.9	2.7				16	0.1	4827.1	108.9	4641	5006.1	-79	2.2				18	0.2	10224.7	678.4	9105	11459.5	-37.2	2.4				14	0.1	16031	1000.7	14156.2	17165.9	-112.4	2.2
	Background	BLM	2	0.2	6401.4	189.7	6035.4	6807.2	2.7				17	0.1	8412.1	1286.2	6124.5	10394.3	-77.9	1.9				19	0.2	4996.8	715	3568	6016.8	-38.8	3.4
		PICH	3	0.2	5208.3	1728.5	2896.3	8265	2.9				18	0.1	4484.2	117.1	4137.9	4629.2	-77.9	1.9				20	0.2	9164.9	538.5	8258.8	10419.5	-38.8	3.4		deltaBLM + GFP-BLM-NN_ICRF_GFP-PICH-CEN-10 early ana.czi
		BLM	4	0.2	7183.3	834.7	5898.7	8217.7	2.9				19	0.2	7134.4	1120	5133.5	9445.9	-77.4	2.8				21	0.2	4147	350.5	3236.8	4680.8	-36.9	3.1				1	0.1	1975.1	82.8	1840.2	2197.5	-45	2.1
		PICH	5	0.2	4591.8	1202.7	2845.9	6904.6	3.8				20	0.2	4492.1	87.5	4323.3	4649.6	-77.4	2.8				22	0.2	9902.7	765.3	8665.2	10866.8	-36.9	3.1				2	0.1	11431.3	482.5	10466.2	12221	-45	2.1
		BLM	6	0.2	7291.7	725.4	6055.9	8548.2	3.8				21	0.1	8969.7	938	7388.5	11019.3	-96.3	1.8				23	0.1	4702.4	565.1	3868.7	5895.1	-39.9	1.8				3	0.2	6948.7	1603.7	4648.8	10509.4	-137.5	2.6
		PICH	7	0.1	7646.5	1215.7	6335.3	9951.7	1.6				22	0.1	4549	90.2	4401.4	4688	-96.3	1.8				24	0.1	8861.3	189.2	8465	9234.8	-39.9	1.8				4	0.2	11767.1	933.9	10591.7	13321.5	-137.5	2.6
		BLM	8	0.1	8745.1	432.4	8237.8	9618.6	1.6				23	0.2	8308.6	1072.7	6424	10181.9	98.6	2.4				25	0.1	6256.1	703.1	4912	7337.7	-35.8	1				5	0.1	4722.7	785.3	3904.4	6399.8	-161.6	2
		PICH	9	0.2	7224.5	938.9	5255.1	8915.2	2.9				24	0.2	4751.9	77.5	4603.3	4943	98.6	2.4				26	0.1	10120	183.6	9704	10439.7	-35.8	1				6	0.1	10348.9	759.7	8937	11456.5	-161.6	2
		BLM	10	0.2	7332	557.3	6377.2	8255.7	2.9				25	0.2	6597.9	740.2	5322	7878.5	102.9	2.3				27	0.4	4439.6	927.6	3205.2	8348.6	54.6	5.8				7	0.2	7343.6	714.2	5926.5	8853	-142.9	3.3
		PICH	11	0.3	6639.6	528.4	5641.5	7477.7	4.5				26	0.2	4754.6	98.8	4544	4997.5	102.9	2.3				28	0.4	9315.9	590.5	8281.2	10551.1	54.6	5.8				8	0.2	12748.1	749.8	11212.5	13632.4	-142.9	3.3
		BLM	12	0.3	7817.5	337.3	7026.6	8457.8	4.5																										9	0.2	7249.4	1072.9	5438.2	9218.5	-144.5	3.4
		PICH	13	0.2	5982.3	861	4760.6	8106.9	3.6		deltaBLM + GFP-BLM-delta51_ICRF_GFP-PICH-CEN-15 early ana.czi											deltaBLM + GFP-BLM-delta13_ICRF_GFP-PICH-CEN-05 early ana.czi													10	0.2	12352.2	670.7	10569.5	13387.6	-144.5	3.4
		BLM	14	0.2	8316.8	303.4	7791.7	8921.7	3.6				1	0.2	3340.5	263.6	2821.5	3818.3	-65.3	2.7				1	0.3	1808.6	58.3	1644.4	1926.8	-101.6	3.9				11	0.1	6786.1	838.2	5186	7838.4	-136.4	1.8
		PICH	15	0.1	5603.9	414.8	4864.5	6568.7	1.9				2	0.2	7961.8	307.2	7367.5	8340.1	-65.3	2.7				2	0.3	4614.6	257.9	4579.1	5536.7	-101.6	3.9				12	0.1	13089.6	743.7	11483	14137.3	-136.4	1.8
		BLM	16	0.1	8207.6	291.5	7701	8721.5	1.9				3	0.1	5237.2	713.2	3893.5	6594.3	-69	2.1				3	0.1	2718.6	327.5	2342.7	3336.5	167	1.3				13	0.2	4926.6	1705.1	3204	8807.5	-168.1	2.4
		PICH	17	0.2	5808.6	388.4	5151.5	6603.5	2.5				4	0.1	8147.2	600.3	6884	8804.8	-69	2.1				4	0.1	4605.7	215.4	4269.5	5072.8	167	1.3				14	0.2	11147.2	667.9	10318.7	12407.1	-168.1	2.4
		BLM	18	0.2	7122	628.3	6265.5	8290.8	2.5				5	0.2	5517.5	1137	3307.2	7434.1	-58.8	3.8				5	0.1	2700.8	273.3	2222	3130.8	0	0.8				15	0.1	5906.2	657.8	4897.5	7385	-163	1.7
		PICH	19	0.3	7384.1	1448.2	4284.8	9556.1	4.5				6	0.2	8159.4	628.9	6901.8	9290.8	-58.8	3.8				6	0.1	4584.9	29.8	4541.5	4630.2	0	0.8				16	0.1	11782.2	231.2	11478.4	12362	-163	1.7
		BLM	20	0.3	7444.4	1160.9	5255.5	9014.3	4.5				7	0.2	5761.7	724.1	4624	7394.6	113.3	3				7	0.2	3042.6	933.7	1758	4978.4	-16.6	3				17	0.1	5917.3	910.2	4429.5	7448.8	-154.3	1.9
		PICH	21	0.1	7167.5	598.2	6300	8127.6	1.4				8	0.2	8112.2	477.2	7053	9131.8	113.3	3				8	0.2	4621.6	373.3	4101.9	5442.4	-16.6	3				18	0.1	11584	114.9	11242.8	11817.6	-154.3	1.9
		BLM	22	0.1	7848.7	451	6984.5	8506.6	1.4				9	0.1	5495.2	829.8	4195	7252.9	103.8	2				9	0.1	3813.3	439.7	2780.5	4414.8	-49.5	1.5
		PICH	23	0.1	7846.4	654.9	7104.3	9102.9	1.2				10	0.1	8024	368.5	7113.5	8505.6	103.8	2				10	0.1	4491	246.1	3909	4845	-49.5	1.5		deltaBLM + GFP-BLM-NN_ICRF_GFP-PICH-CEN-05 ana-like.czi
		BLM	24	0.1	8835.8	523.7	8293.7	9929.1	1.2				11	0.1	6638.5	1391.7	4125.8	8117.8	107.1	1.8				11	0.1	2940.7	977.9	1722.5	4703.3	-20.6	1.1				1	0.2	1758.1	60	1649.5	1893.8	-146.3	2.3
		PICH	25	0.1	5851.4	502.5	5272.4	6604.5	0.7				12	0.1	8151.1	538.5	7001.5	8978.4	107.1	1.8				12	0.1	4266.6	349.5	3870.5	4885.7	-20.6	1.1				2	0.2	8671.9	607	7881.6	9727.2	-146.3	2.3
		BLM	26	0.1	8839.9	231.3	8350.7	9127	0.7				13	0.1	5333.6	353.1	4417.5	5869.5	114.9	1.5				13	0.1	4183.1	1290.9	2691	6606.1	-20.1	1.8				3	0.1	4171.5	453.7	3645.4	5012.8	-169.7	1.1
		PICH	27	0.2	5693.8	600	4449	7176.2	3.3				14	0.1	7711.3	256.9	7377.7	8136.5	114.9	1.5				14	0.1	4733.8	376.5	4149.5	5436.6	-20.1	1.8				4	0.1	9262.4	178.5	8831	9553	-169.7	1.1
		BLM	28	0.2	6760.7	376.1	6034.9	7348.7	3.3				15	0.1	5263.2	908.3	3303	6443.4	-76	1.5				15	0.2	2744	428.1	1919.5	3610.8	-15.8	3.1				5	0.1	4780.4	658.2	3610.2	5913.5	-172.9	1.8
		PICH	29	0.1	5014.4	255.3	4660.9	5595	1.9				16	0.1	8486.5	316	7803	8828	-76	1.5				16	0.2	5256.4	193.9	4977.5	5622	-15.8	3.1				6	0.1	9570	302.9	8896.5	9897.8	-172.9	1.8
		BLM	30	0.1	6506.9	415.7	5743	7158	1.9				17	0.1	5323.4	1583.5	2884	7603.4	-72.8	1				17	0.1	2836.4	206.8	2459.8	3271.5	-15.1	1.8				7	0.3	5098	1340.4	3831	9218.8	-178.2	4
		PICH	31	0.1	5323.2	566.5	4279.9	6100.6	1.5				18	0.1	8454.2	344.8	7714	8889.9	-72.8	1				18	0.1	4869.1	125.3	4621.7	5080	-15.1	1.8				8	0.3	9430.4	582.8	8423.8	10846.7	-178.2	4
		BLM	32	0.1	7160.8	222.3	6677	7583.7	1.5															19	0	5965	788.4	4729	6943.5	-7.1	0.5				9	0.1	9077.9	486.7	8458.1	10401.7	-177.8	1.7
		PICH	33	0.1	6289.8	639.7	4932.3	6919.6	2		deltaBLM + GFP-BLM-delta51_ICRF_GFP-PICH-CEN-14 metaphase-like.czi													20	0	5346.8	161.3	5092	5575.4	-7.1	0.5				10	0.1	10556.5	323.6	9841	11157.1	-177.8	1.7
		BLM	34	0.1	6701.2	797.5	5567.5	7700.2	2				1	0.2	2516.3	94.4	2331.5	2684.5	8.5	2.9															11	0.1	5980.1	1360.2	4233.7	8348.3	-7.6	2
													2	0.2	6207	316.1	5645.5	6774.3	8.5	2.9		deltaBLM + GFP-BLM-delta13_ICRF_GFP-PICH-CEN-03 ana-like.czi													12	0.1	9632.1	897.4	8288.7	10944.5	-7.6	2
	deltaBLM + GFP-BLM-WT_ICRF_GFP-PICH-CEN-28 late ana.czi												3	0.3	5040.1	1092.5	3670.5	7441.2	-62.7	4.3				1	0.1	2946.3	195	2494	3267.8	-93.2	1.2				13	0.2	6302.3	2133.6	3445.5	11228.1	170.2	2.7
	Background	PICH	1	0.3	2390.2	111.8	2199.6	2610.8	3.9				4	0.3	5737.8	292.4	5341.8	6653	-62.7	4.3				2	0.1	28720.8	1392.7	27447	31910	-93.2	1.2				14	0.2	9431.6	537.2	8300	10393.1	170.2	2.7
	Background	BLM	2	0.3	14882.5	203.9	14373.7	15227.1	3.9				5	0.2	4050.4	463.1	3143.5	4750.8	-61	3.5				3	0.1	4450	730.5	3143	5446.5	101.7	1
		PICH	3	0.2	3865.9	346.6	3216.3	4408.9	2.8				6	0.2	5340	139.6	4937.8	5618.5	-61	3.5				4	0.1	23873.4	880.8	22506.5	25101.8	101.7	1		deltaBLM + GFP-BLM-NN_ICRF_GFP-PICH-CEN-04 mid ana.czi
		BLM	4	0.2	16917.1	594.2	15359	17991	2.8				7	0.1	5541.5	1014	3805	7361.3	103	2.2				5	0.1	3909.1	406.4	3025.5	4306.8	-107	1.2				1	0.1	1947.5	61.8	1841	2079.6	-163.8	2.1
		PICH	5	0.4	4212.6	488.1	3260	5326.1	6.6				8	0.1	6211.9	189.8	5900.1	6560.5	103	2.2				6	0.1	24487.6	538.8	23416	25194.1	-107	1.2				2	0.1	12798.8	555.3	11782.7	13535.1	-163.8	2.1
		BLM	6	0.4	17363	1627.1	12816.7	19740.8	6.6				9	0.2	4398.5	772.7	3032	5630.2	127	2.5				7	0.1	5443.3	909.8	4025	6914	72	1.3				3	0.1	3125.3	380.9	2506.1	3711.7	-154.3	1
													10	0.2	5672.6	152	5283	5971.7	127	2.5				8	0.1	26652.8	801.6	25426.5	27733.2	72	1.3				4	0.1	10901.3	247.8	10489.4	11422.9	-154.3	1
	deltaBLM + GFP-BLM-WT_ICRF_GFP-PICH-CEN-26 mid ana.czi												11	0.1	4971.6	875.6	3576	6073.2	113.6	2				9	0.1	5951.7	761.1	4425.5	7253	93.9	1.4				5	0.2	4002.5	663.8	2304	4846.5	-132.5	3.2
	Background	PICH	1	0.1	2042.1	89.9	1852.3	2260.8	2.2				12	0.1	5604.2	184.9	5103	6037.8	113.6	2				10	0.1	27601	396.9	26933	28343.7	93.9	1.4				6	0.2	12174.7	496.7	10967	13025.1	-132.5	3.2
	Background	BLM	2	0.1	10088.3	182.6	9722.7	10380.4	2.2				13	0.1	3943.6	311.4	3286.5	4338.5	-82.1	1.2				11	0.1	4812.1	572.5	3445.8	5439.1	-87.9	0.9				7	0.3	4280.6	1015.5	2517.8	6713.1	-145.4	3.9
		PICH	3	0.2	3208.3	228	2676.7	3783.5	3.8				14	0.1	5827.8	163.6	5644.2	6125	-82.1	1.2				12	0.1	23557.5	919.3	21928.2	24749	-87.9	0.9				8	0.3	12225.4	896	9428	13521.7	-145.4	3.9
		BLM	4	0.2	11690.3	310.9	10297	12263.2	3.8				15	0.2	3852.3	592	2936.9	4811.7	106.9	3.5				13	0.1	4750.5	552.4	3773	5511.4	84.3	1.6				9	0.1	3977.9	387.3	3291.5	4589.6	-136.6	0.8
		PICH	5	0.3	3043.6	375.1	2348.6	4022.7	4.6				16	0.2	5721.3	113.2	5351	6027.3	106.9	3.5				14	0.1	25185.4	838.7	23352	26527.4	84.3	1.6				10	0.1	13279.7	193	12932.5	13563.5	-136.6	0.8
		BLM	6	0.3	10967.8	662.2	9734	11981.8	4.6															15	0.1	5352.9	1423.1	2996	7140.1	94.6	0.8
		PICH	7	0.1	2919.9	398.2	2116.2	3773.8	2		deltaBLM + GFP-BLM-delta51_ICRF_GFP-PICH-CEN-13 early ana.czi													16	0.1	29044.5	1121.8	27122.5	30493.9	94.6	0.8		deltaBLM + GFP-BLM-NN_ICRF_GFP-PICH-CEN-02 ana-like.czi
		BLM	8	0.1	10645.6	717.7	9633.8	11827	2				1	0.1	3671	530	2777.2	4360.9	-35	2				17	0.1	5211.4	1464.7	2852	7139.4	-88	0.9				1	0.2	998.2	104.3	1026.5	1361.5	147.4	2.4
		PICH	9	0.3	3162	485.1	2271.4	3837.1	4.7				2	0.1	7106.4	151.8	6894.9	7374.2	-35	2				18	0.1	28961.1	1005.7	26990	30343.3	-88	0.9				2	0.2	4208.2	281.9	3816.8	4698.5	147.4	2.4
		BLM	10	0.3	10970.9	1020.7	9248.5	12848.9	4.7				3	0.2	5871	794.4	4246.2	7012.1	-31.5	2.4				19	0.1	5493	1049.1	3673	6992.5	-80.1	1.5				3	0.2	2135.6	474.6	1431.3	2943.3	-28.8	3
		PICH	11	0.3	3047.6	278.3	2353.6	3433.1	4.5				4	0.2	7097.8	124.4	6845.9	7364.1	-31.5	2.4				20	0.1	29256	728.4	27658.7	30383.3	-80.1	1.5				4	0.2	3991.4	97.8	3767.7	4228	-28.8	3
		BLM	12	0.3	11766.3	363.4	10346.5	12454.6	4.5				5	0.1	7073.7	543.1	6017	8043.5	-45	1.5				21	0.1	5485.3	442.7	4619.5	6349.1	-102.6	1.9				5	0.2	2140.1	370	1688.8	2956.1	-35.5	2.9
													6	0.1	7212.8	144.3	6981.5	7550	-45	1.5				22	0.1	29398.7	2183.5	25402.6	32837.1	-102.6	1.9				6	0.2	4266.2	87.6	4091.9	4458.5	-35.5	2.9
	deltaBLM + GFP-BLM-WT_ICRF_GFP-PICH-CEN-16 mid ana.czi												7	0.1	6458.4	570.3	5515.8	7502.2	137.3	1.1				23	0.1	3856.7	537.2	3058.5	4737.4	-92.9	2				7	0.1	3385.2	625.5	2238	4569	-21.1	1.5
	Background	PICH	1	0.2	2433.1	108.1	2218.3	2668.6	3.1				8	0.1	7073.7	115.5	6840.5	7246.3	137.3	1.1				24	0.1	25065.5	791.6	23239.6	26020.8	-92.9	2				8	0.1	4679.5	119	4374	4880	-21.1	1.5
	Background	BLM	2	0.2	9297.4	332.7	8570.3	9963.2	3.1				9	0.2	6243.8	858.2	4899.8	7578.1	-38.4	2.4				25	0.6	4069.2	813.3	2557.8	5903.5	0.6	8.9				9	0.2	2226.6	450.1	1635	3135.4	-21.8	2.6
		PICH	3	0.2	4181.4	287.3	3206.2	4599	2.6				10	0.2	6964.6	310.1	6359.5	7452.5	-38.4	2.4				26	0.6	25394.3	2746.3	20562	30873.9	0.6	8.9				10	0.2	4249.6	163.4	3879.6	4582.7	-21.8	2.6
		BLM	4	0.2	11324.9	647.8	9787	12458.4	2.6				11	0.2	6544.1	980.5	4257.7	8093.9	-33.4	2.6				27	0.1	5808.9	577.5	4870	6770.5	68.2	1.1				11	0.1	2546	259.3	2107.1	2915.3	-35.5	1.1
		PICH	5	0.1	3775.1	455.9	3071.3	4490.5	1.5				12	0.2	7277.5	302.4	6523.3	7682.6	-33.4	2.6				28	0.1	25803	207.6	25366	26144.9	68.2	1.1				12	0.1	3921.4	80.5	3813.7	4043.6	-35.5	1.1
		BLM	6	0.1	10733.4	254.5	10137	11107.5	1.5				13	0.2	5950.4	651.2	4205.7	7355.5	-44.5	3.4
		PICH	7	0.1	4250.4	436.4	3177	4828.5	0.9				14	0.2	7549.3	214.4	7054.6	7921.4	-44.5	3.4		deltaBLM + GFP-BLM-delta13_ICRF_GFP-PICH-CEN-02 mid ana.czi
		BLM	8	0.1	11484	190.6	10970	11643.9	0.9				15	0.2	5147.7	620	4080.9	6576.8	-35.6	2.3				1	0.1	2584.5	91.3	2410.3	2769	-99.8	1.9
		PICH	9	0	4523.7	447.3	3579.5	4855.7	0.6				16	0.2	7423.6	249.4	6984	7864.1	-35.6	2.3				2	0.1	16703.8	290.4	16277.7	17284.2	-99.8	1.9
		BLM	10	0	13007.5	164.5	12781.5	13286.2	0.6				17	0.2	6156.4	784.9	4564.6	7917.5	-29.6	2.5				3	0.1	4591.1	595.2	3531	5396.3	-122	1.8
		PICH	11	0.1	4107.3	293.1	3481	4641.8	1.8				18	0.2	7512.6	141.9	7049.3	7726	-29.6	2.5				4	0.1	17808.8	252.2	17112	18313.2	-122	1.8
		BLM	12	0.1	12318.6	388.1	11646.6	12849.6	1.8
		PICH	13	0.1	3297.5	212.6	2934.8	3677	1.1		deltaBLM + GFP-BLM-delta51_ICRF_GFP-PICH-CEN-12 metaphase-like.czi
		BLM	14	0.1	11115.7	271.8	10545	11402.5	1.1				1	0.2	4973.9	724.5	3729.6	5986	169.3	2.3
													2	0.2	4323.5	104.8	4141.2	4620.2	169.3	2.3
	deltaBLM + GFP-BLM-WT_ICRF_GFP-PICH-CEN-15 early ana.czi												3	0.2	6066.7	791.1	4528.4	7255.6	-15.4	3.3
	Background	PICH	1	0.3	5581	862.4	4563.4	7186.1	4.3				4	0.2	4439.2	124.7	4245.1	4721.7	-15.4	3.3
	Background	BLM	2	0.3	9627.6	728.5	8407.7	10598.6	4.3				5	0.1	6389.9	1026.1	4580.5	8178.2	156.6	2.1
		PICH	3	0.3	8680.2	1544.8	6356.5	12325.3	4.2				6	0.1	4412.2	110.7	4258	4629.2	156.6	2.1
		BLM	4	0.3	10473.2	755.9	9427.8	12206.4	4.2				7	0.1	6396.8	519.7	5204	7332.3	-26.6	1.5
		PICH	5	0.1	8947.5	934.5	7529	10567.5	2.1				8	0.1	4523	87.2	4330.5	4684	-26.6	1.5
		BLM	6	0.1	10345.7	277.1	9682	10696.3	2.1				9	0.1	6325.8	963.3	4616.5	7447.3	-19.2	1.5
		PICH	7	0.2	9254.4	1086.8	7184.5	11231.3	2.4				10	0.1	4468.5	127.4	4302.3	4744.9	-19.2	1.5
		BLM	8	0.2	10094.5	383.1	9433	10938	2.4				11	0.1	8987.2	1305.8	6812.5	10522.8	-24.4	1.2
		PICH	9	0.1	7761.4	913.1	6491	9844.1	1.6				12	0.1	4584	86.8	4413.2	4706.2	-24.4	1.2
		BLM	10	0.1	9534.8	231	9111	10028.8	1.6				13	0.1	7524.2	668.6	5711	8459.8	-23.8	2.1
		PICH	11	0.3	7937.8	1185.9	5907.4	10100.5	4.4				14	0.1	4548.3	135.1	4225.9	4741.3	-23.8	2.1
		BLM	12	0.3	10666.5	663.7	9387	12059.2	4.4				15	0.1	7578.1	1600.2	5257	9723	-34.7	1
													16	0.1	4431.7	81.2	4254.6	4542.6	-34.7	1
	deltaBLM + GFP-BLM-WT_ICRF_GFP-PICH-CEN-13 early ana.czi												17	0.2	5730.5	420.3	4823.5	6603.7	-14.8	3.4
	Background	PICH	1	0.3	4266.8	192.4	3976.1	4794.9	4				18	0.2	4349.8	70.5	4189.7	4499.4	-14.8	3.4
	Background	BLM	2	0.3	30052.7	789.9	28327	31303.8	4				19	0.2	6734.6	1348.4	4352.2	8462.2	-22.9	2.9
		PICH	3	0.3	4651	831	3524	7241	4				20	0.2	4505.1	135.3	4187	4766.3	-22.9	2.9
		BLM	4	0.3	27969.9	1477.3	25947.5	30832.7	4
		PICH	5	0.1	4721.3	741.1	3362.7	6010.4	2		deltaBLM + GFP-BLM-delta51_ICRF_GFP-PICH-CEN-09 ana-like.czi
		BLM	6	0.1	26912.7	694.7	25644.5	28066.1	2				1	0.1	5032.8	568.6	4228.2	5844.4	166.8	1.7
		PICH	7	0.1	6219.4	1139.9	4648.5	8321.5	2.1				2	0.1	6439.2	317	5973.5	7034.5	166.8	1.7
		BLM	8	0.1	32195.2	1048.6	30348	33836.6	2.1				3	0.1	8225.4	767.1	6520.5	9432.6	175.1	1.9
		PICH	9	0.4	6245.2	648.9	4688	7424	5.8				4	0.1	6588.1	258.8	6154.4	7035.5	175.1	1.9
		BLM	10	0.4	31040.5	1197.9	28289	33265.9	5.8				5	0.1	9672.4	2430.7	7077.7	13291.2	175.2	1.2
		PICH	11	0.1	5908.9	735.9	4359.6	7031.9	2				6	0.1	6546.1	160.2	6301.1	6842.2	175.2	1.2
		BLM	12	0.1	30405.4	547.6	28971.5	31409.7	2				7	0.1	10813	1424	7262	12416.9	-175.5	1.2
		PICH	13	0.2	5162.9	946.5	3134.5	6714.9	2.7				8	0.1	7130.5	125.6	6940.1	7370.7	-175.5	1.2
		BLM	14	0.2	30512.8	1346.6	27427.5	32761	2.7				9	0.1	9753.7	1244.6	7452	12024.8	-13.4	1.4
		PICH	15	0.1	4883.6	610.8	3944.2	6141.2	1.4				10	0.1	6679.1	325.6	6261	7223.9	-13.4	1.4
		BLM	16	0.1	26758.2	804.1	24257.5	27439.3	1.4				11	0.1	10487.5	1880.7	6896	12990.8	162.3	1.5
													12	0.1	6337.7	139	5996.9	6564.4	162.3	1.5
	deltaBLM + GFP-BLM-WT_ICRF_GFP-PICH-CEN-12 late ana.czi												13	0.1	11187.8	1657	8566	13558	-166	0.8
	Background	PICH	1	0.3	2690.5	111.5	2471.3	2967	4.4				14	0.1	6625.8	228.2	6332.6	6954.5	-166	0.8
	Background	BLM	2	0.3	12751.8	485.5	11982.6	13771	4.4				15	0.1	11836.7	1115.6	9819.5	13601	8.5	1.3
		PICH	3	0.2	5238.4	580.6	3899	6642.7	3.6				16	0.1	6821.7	100.3	6606.8	6948.1	8.5	1.3
		BLM	4	0.2	15317.6	634.8	12911	16023.8	3.6				17	0.1	13405.2	2115.5	8696.5	16265.5	-28.8	1.9
		PICH	5	0.3	9414.9	2305.1	5957	15240.1	4.9				18	0.1	6510.1	241.8	6081	6904.1	-28.8	1.9
		BLM	6	0.3	17335.2	2343.8	13332	22546.2	4.9				19	0.1	8863.4	943.2	6959.5	10296.8	-152.7	1.1
		PICH	7	0.2	5799.8	1029.7	4164	7711.2	2.4				20	0.1	6316.2	143.7	6052.5	6552.9	-152.7	1.1
		BLM	8	0.2	14121.8	1039.9	12326	16425.3	2.4				21	0.1	8393.7	1045.7	6703	10065.2	30.1	1.2
		PICH	9	0.1	5611.8	598.7	4307	6387.5	0.9				22	0.1	5691	137	5374.5	5920	30.1	1.2
		BLM	10	0.1	14243.2	870	12309	15224	0.9				23	0.1	10397.6	1370.7	8850.3	13445.2	-29.6	1.4
													24	0.1	5105.1	74.6	4974.6	5296	-29.6	1.4
	deltaBLM + GFP-BLM-WT_ICRF_GFP-PICH-CEN-09 mid ana.czi												25	0.2	8418.1	2631.5	5938.1	15280.9	173.5	3.5
	Background	PICH	1	0.3	3338.2	326.3	2428	3868.2	4.7				26	0.2	6650.3	281.3	6172.5	7187.2	173.5	3.5
	Background	BLM	2	0.3	11391	584.8	9618	12289.5	4.7
		PICH	3	0.4	3431.1	358.4	2983.7	4656	5.5		deltaBLM + GFP-BLM-delta51_ICRF_GFP-PICH-CEN-08 ana-like.czi
		BLM	4	0.4	11277.4	441.2	10084	11971.3	5.5				1	0.1	3032.1	286.3	2434.8	3508.6	-65.1	2
		PICH	5	0.1	4674.3	622.3	3995.8	5911.1	1.3				2	0.1	6283.4	314.7	5816	6800.6	-65.1	2
		BLM	6	0.1	12760.8	368.4	12226.1	13338.4	1.3				3	0.2	7895.4	1774.5	5199	11070.7	-75.8	2.6
		PICH	7	0.3	7479.3	2030.8	3622	11117.9	4.1				4	0.2	7040	487.3	6311.7	7865.5	-75.8	2.6
		BLM	8	0.3	13393.5	1442.6	10505.9	15803	4.1				5	0.1	8736.8	1224.2	6145.5	10620.4	-90	1.3
		PICH	9	0.2	4517	464.1	3798	5725.2	2.8				6	0.1	7204.5	395.6	6495.8	7687	-90	1.3
		BLM	10	0.2	12300.6	697.6	10724.1	13150.4	2.8				7	0.1	8658.1	787.8	7283.5	10059.8	-59	1.3
		PICH	11	0.2	4681.7	1277.1	2411	7424.7	3.2				8	0.1	6909.1	220.5	6608.3	7240.6	-59	1.3
		BLM	12	0.2	10780.3	497.3	9716.2	11844.7	3.2				9	0.1	8456.5	1656.4	5425.5	11859.4	-63.8	2.2
		PICH	13	0.2	5487.8	706.1	4253.8	6902.4	2.8				10	0.1	6658.7	204.2	6328.5	7128.7	-63.8	2.2
		BLM	14	0.2	13760.1	540.1	11952	14782.4	2.8				11	0.1	8148.2	1338.6	6243	10643.7	114.4	1.6
		PICH	15	0.2	4774.8	937.9	3670	6651.8	2.8				12	0.1	6903.6	383.1	6280	7503.8	114.4	1.6
		BLM	16	0.2	12514.4	621.2	10693	13445.9	2.8				13	0.1	7955.7	2240.2	4381.5	11698.4	-68	2
		PICH	17	0.1	4036.1	956.1	2326	5707.9	2				14	0.1	6762.4	237	6436.5	7297.2	-68	2
		BLM	18	0.1	12729.2	660.9	11755	13625.3	2				15	0.1	9587.8	1456.9	6930	11975.2	100.2	1.3
													16	0.1	7258.6	261.3	6800.5	7753.3	100.2	1.3
	deltaBLM + GFP-BLM-WT_ICRF_GFP-PICH-CEN-02 early ana.czi
	Background	PICH	1	0.2	3866.7	384.6	3357.3	4807	3.3		deltaBLM + GFP-BLM-delta51_ICRF_GFP-PICH-CEN-05 ana-like.czi
	Background	BLM	2	0.2	6074.5	249.5	5670	6734	3.3				1	0.2	2891.4	365.4	2484.6	3662	-83.7	2.4
		PICH	3	0.2	5108.9	977.2	3297.2	7358.4	2.8				2	0.2	6230.6	179.4	5939.6	6714.2	-83.7	2.4
		BLM	4	0.2	7197.6	176.8	6780	7600.6	2.8				3	0.2	5411.1	1509.8	3291	8624	-93.6	3.1
		PICH	5	0.1	5841.1	747	4803.6	6974.8	1.4				4	0.2	5688.3	344	5080.5	6456.4	-93.6	3.1
		BLM	6	0.1	7382.6	312.4	6757	8000	1.4				5	0.1	4939.2	1009.3	2930	6554.7	-72.9	1.8
		PICH	7	0.1	6119.6	585.3	4712.5	6750.5	1.3				6	0.1	5849	412.4	5051.2	6576.1	-72.9	1.8
		BLM	8	0.1	7034.3	262.8	6651.5	7596.5	1.3				7	0.2	6524.5	914.5	4138	8436.9	96.3	3.5
		PICH	9	0.3	5998.8	902.7	4750.9	8891.7	4.1				8	0.2	6218.1	252.4	5649.7	6704.6	96.3	3.5
		BLM	10	0.3	6636.1	417	5929	7346.3	4.1				9	0.2	5199.8	948.8	3426	7431.2	100.1	3.7
		PICH	11	0.2	6101.8	533.6	5260	6976.5	2.5				10	0.2	5502.6	308.2	4823	6112.3	100.1	3.7
		BLM	12	0.2	6633	248.1	6150.3	7067.6	2.5				11	0.1	6462	1904.6	3544	9280.6	116.6	2
		PICH	13	0.2	5960.6	911.2	4041	7624.1	3				12	0.1	7003.8	270.5	6514.2	7347.1	116.6	2
		BLM	14	0.2	7115.4	372.8	6532.3	7851.4	3				13	0.2	5765.2	1303.3	3607	8314.8	116.6	2.3
		PICH	15	0.2	5500.2	620	4600	6951.6	3.6				14	0.2	6714.7	272.8	6306.7	7246	116.6	2.3
		BLM	16	0.2	6907.7	248.2	6434.5	7388.6	3.6				15	0.2	5825.9	1001.3	4296.6	8313.3	-83.2	2.7
		PICH	17	0.1	5903.9	269.8	5348	6282.1	1.8				16	0.2	6832.3	261.2	6317	7313.4	-83.2	2.7
		BLM	18	0.1	7458.4	225.4	7016	7891.5	1.8				17	0.1	5330.6	638.1	4020	6293.6	95.7	2
		PICH	19	0.1	4881.1	297.5	4334.5	5546.6	1.6				18	0.1	5830.6	211.1	5541	6234	95.7	2
		BLM	20	0.1	6917.7	154.7	6593	7161.1	1.6				19	0.2	7227.2	1084.6	4674	9009.5	81.5	2.6
		PICH	21	0.2	4095.5	352.6	3360.2	5233.2	3.2				20	0.2	6319.3	461.8	5318	7070.5	81.5	2.6
		BLM	22	0.2	7014.1	360.2	6355.2	7621.6	3.2
											deltaBLM + GFP-BLM-delta51_ICRF_GFP-PICH-CEN-04 early ana.czi
													1	0.1	2849.2	246.3	2506.5	3308.8	-89.1	2.1
													2	0.1	5230.4	157.9	4885	5501.4	-89.1	2.1
													3	0.1	5288.6	636.2	4186	6345.4	-87.8	1.7
													4	0.1	5277.2	123.9	5050.6	5517	-87.8	1.7
													5	0.1	5214.6	968.7	3540.5	6929.5	-87.3	1.4
													6	0.1	5497	142.1	5207.5	5685.8	-87.3	1.4
													7	0.1	5867	1035.6	3432.5	7125.4	-5.2	1.1
													8	0.1	5545.9	134.7	5349.6	5753.6	-5.2	1.1
													9	0.1	4609.8	656.2	2978.2	5353.4	-91.4	1.4
													10	0.1	5196.6	83.2	5080	5367.5	-91.4	1.4
													11	0.1	5108.3	679.3	3875.5	5989.8	-148.4	1
													12	0.1	5336.3	96.9	5153	5514.4	-148.4	1
													13	0.1	6190.5	1008.5	4260	7764.1	78.7	1.3
													14	0.1	5057.2	183.1	4664.5	5419.1	78.7	1.3
													15	0.1	6305.5	964.5	4815	8241.4	-77.6	1.4
													16	0.1	4886.2	294.2	4410	5221.7	-77.6	1.4
													17	0.1	4133.5	656.9	3144	5336.9	-114.4	1.2
													18	0.1	4203	64.6	4111.2	4341.5	-114.4	1.2
													19	0.1	4710.1	424.4	4044.2	5315	-108.9	1.3
													20	0.1	4431.3	84.5	4280.1	4611.2	-108.9	1.3
													21	0.1	4170.2	320.8	3562.8	4804.8	98.4	1.8
													22	0.1	4551.5	137.5	4262.9	4833.8	98.4	1.8
											deltaBLM + GFP-BLM-delta51_ICRF_GFP-PICH-CEN-03 meta-like.czi
													1	0.1	4464.2	426.6	3749	5060	30.3	1.5
													2	0.1	8705.3	238.3	8247	9089.4	30.3	1.5
													3	0.1	7343.4	1079.8	5265	8856.2	-44.3	1.8
													4	0.1	7743.5	325.9	6993	8270.2	-44.3	1.8
													5	0.2	8745.7	1060.5	6386	11272	-42.3	2.4
													6	0.2	8876.9	471.8	8246.2	9836.2	-42.3	2.4
													7	0.1	7828.2	1331.5	5354.5	10134.7	-53.3	2.2
													8	0.1	8693.8	740.7	7365.5	9599.4	-53.3	2.2
													9	0.3	7005.6	853.4	5240	8869.8	-50.4	4.1
													10	0.3	8258.6	329.6	7547.3	8828.7	-50.4	4.1
													11	0.1	9060	1351.2	6886	11024.7	-44.3	2
													12	0.1	7802.3	341.4	7481.8	8572.1	-44.3	2
													13	0.1	7872.7	634.7	7162.5	9165.5	130	2.1
													14	0.1	8781.3	436.3	7905.2	9474.8	130	2.1
													15	0.1	6110.1	1064.8	4367.5	7664.6	141.7	1.6
													16	0.1	8536	185.9	8191.3	8852.2	141.7	1.6
											deltaBLM + GFP-BLM-delta51_ICRF_GFP-PICH-CEN-02 early ana.czi
													1	0.2	3704.1	423.7	2977	4481.1	-125.5	3.4
													2	0.2	4754.1	118.4	4549	4992.6	-125.5	3.4
													3	0.1	5127.3	440	4055.5	5738.3	54.1	1.6
													4	0.1	4722.9	99.8	4494	4915.4	54.1	1.6
													5	0.3	4219.1	265.5	3693.5	4808.7	-119.7	4.7
													6	0.3	4721	108.2	4545.7	5023.8	-119.7	4.7
													7	0.2	6087.2	1285.2	4405.7	8089	-116.6	3.4
													8	0.2	4917.6	108.1	4717.8	5156.1	-116.6	3.4
													9	0.1	7224.8	819.3	5515.5	8319	56.8	2
													10	0.1	4996.2	135.5	4692.5	5292	56.8	2
													11	0.2	4430.7	520.8	3386.5	5262.9	-110.8	3.3
													12	0.2	4947.6	121.8	4695.7	5121.5	-110.8	3.3
													13	0.2	4848.6	638.6	3952.8	6538.3	-119.8	2.8
													14	0.2	4949.5	110.4	4660	5212.1	-119.8	2.8
													15	0.3	4842.7	375	4017	5596	65.6	3.9
													16	0.3	4824.8	98.8	4651.5	5077.6	65.6	3.9
													17	0.1	5349.6	794.4	3997	6764.6	-115	1.1
													18	0.1	4809.9	97.8	4660.5	5011.5	-115	1.1
													19	0.1	4475.6	347.2	3519	4963.5	-106.1	1.5
													20	0.1	4708.7	72.7	4578	4825.4	-106.1	1.5
											deltaBLM + GFP-BLM-delta51_ICRF_GFP-PICH-CEN early ana.czi
													1	0.1	3883.4	722.7	2737.5	5045.2	117.3	2.2
													2	0.1	5762.5	180	5337.9	6160	117.3	2.2
													3	0.1	5445.5	873.5	3999.8	7084.1	102.9	2
													4	0.1	5522.2	284.3	4708	6008.7	102.9	2
													5	0.2	8122.1	1014.1	5262	10148.4	106.3	2.8
													6	0.2	6346.6	284.9	5706	6859.4	106.3	2.8
													7	0.3	6590	1347.7	3834.2	8584.8	111.5	4.6
													8	0.3	6252.9	351.1	5636	6991.4	111.5	4.6
													9	0.2	5507.7	620.6	3843.5	6533.8	107.6	3.5
													10	0.2	6171.3	217.5	5683.6	6551.7	107.6	3.5
													11	0.2	5667.8	741	4329	7479.9	112.6	3.1
													12	0.2	6397.1	320	5583	6914.1	112.6	3.1
													13	0.2	4963.2	328.1	4516.7	5754.3	112.5	2.9
													14	0.2	6255.2	319.4	5542.7	6760.4	112.5	2.9
													15	0.1	5499.6	680.9	4144	6485	104.6	1.5
													16	0.1	6190.6	386	5661.1	6732.5	104.6	1.5

## Sheet: GFP-BLM Analysis
	GFP-BLM WT
	deltaBLM + GFP-BLM-WT_ICRF_GFP-PICH-CEN-83 late ana			Mean			Background correction					PICH and BLM
	Background	PICH		2719.6		Background	PICH		2719.6				PICH		BLM		PICH	BLM
	Background	BLM		2751.5			PICH		5201.6	2482		PICH	2482	BLM	224.8		2482	224.8
		PICH		5201.6			PICH		5653.8	2934.2		PICH	2934.2	BLM	346.7		2934.2	346.7
		BLM		2976.3			PICH		5806.3	3086.7		PICH	3086.7	BLM	698		3086.7	698
		PICH		5653.8			PICH		5637.7	2918.1		PICH	2918.1	BLM	449.1		2918.1	449.1
		BLM		3098.2			PICH		5837.7	3118.1		PICH	3118.1	BLM	754.6		3118.1	754.6
		PICH		5806.3			PICH		5623.5	2903.9		PICH	2903.9	BLM	436.5		2903.9	436.5
		BLM		3449.5			PICH		5561.2	2841.6		PICH	2841.6	BLM	461.2		2841.6	461.2
		PICH		5637.7			PICH		4347.2	1627.6		PICH	1627.6	BLM	222.7		1627.6	222.7
		BLM		3200.6			PICH		4110.9	1391.3		PICH	1391.3	BLM	261.4		1391.3	261.4
		PICH		5837.7			PICH		3269.7	550.1		PICH	550.1	BLM	42.8		550.1	42.8
		BLM		3506.1			PICH		4363.7	1644.1		PICH	1644.1	BLM	326.1		1644.1	326.1
		PICH		5623.5			PICH		4376.7	1657.1		PICH	1657.1	BLM	785.4		1657.1	785.4
		BLM		3188		Background	BLM		2751.5
		PICH		5561.2			BLM		2976.3	224.8		PICH	2467.7	BLM	1726		2467.7	1726
		BLM		3212.7			BLM		3098.2	346.7		PICH	878.6	BLM	680.2		878.6	680.2
		PICH		4347.2			BLM		3449.5	698
		BLM		2974.2			BLM		3200.6	449.1		PICH	2841.1	BLM	865.2		2841.1	865.2
		PICH		4110.9			BLM		3506.1	754.6		PICH	1270.1	BLM	1227.4		1270.1	1227.4
		BLM		3012.9			BLM		3188	436.5		PICH	1956.6	BLM	27		1956.6	27
		PICH		3269.7			BLM		3212.7	461.2		PICH	1209.3	BLM	649.9		1209.3	649.9
		BLM		2794.3			BLM		2974.2	222.7		PICH	2396	BLM	1175		2396	1175
		PICH		4363.7			BLM		3012.9	261.4		PICH	2282.7	BLM	1341.3		2282.7	1341.3
		BLM		3077.6			BLM		2794.3	42.8		PICH	2999.6	BLM	727.6		2999.6	727.6
		PICH		4376.7			BLM		3077.6	326.1		PICH	3292.2	BLM	1003.9		3292.2	1003.9
		BLM		3536.9			BLM		3536.9	785.4		PICH	1667.9	BLM	0		1667.9	0
												PICH	3965.5	BLM	3058.8		3965.5	3058.8
	deltaBLM + GFP-BLM-WT_ICRF_GFP-PICH-CEN-82 late ana.czi
	Background	PICH		2020.1		Background	PICH		2020.1			PICH	986.7	BLM	17.1		986.7	17.1
	Background	BLM		4113			PICH		4487.8	2467.7		PICH	3477.2	BLM	736.2		3477.2	736.2
		PICH		4487.8			PICH		2898.7	878.6		PICH	3014.3	BLM	660.3		3014.3	660.3
		BLM		5839		Background	BLM		4113			PICH	3156	BLM	965.9		3156	965.9
		PICH		2898.7			BLM		5839	1726		PICH	4545.7	BLM	1396.5		4545.7	1396.5
		BLM		4793.2			BLM		4793.2	680.2		PICH	4171.2	BLM	1425		4171.2	1425
												PICH	3186.2	BLM	1568.7		3186.2	1568.7
	deltaBLM + GFP-BLM-WT_ICRF_GFP-PICH-CEN-81 mid ana.czi											PICH	3738.8	BLM	1380.3		3738.8	1380.3
	Background	PICH		2638.3		Background	PICH		2638.3			PICH	2079.2	BLM	734.1		2079.2	734.1
	Background	BLM		7366.3			PICH		5479.4	2841.1		PICH	4271.4	BLM	1000.2		4271.4	1000.2
		PICH		5479.4			PICH		3908.4	1270.1		PICH	1663.5	BLM	495.8		1663.5	495.8
		BLM		8231.5			PICH		4594.9	1956.6		PICH	3633.9	BLM	443.8		3633.9	443.8
		PICH		3908.4			PICH		3847.6	1209.3		PICH	2227.5	BLM	628.1		2227.5	628.1
		BLM		8593.7			PICH		5034.3	2396
		PICH		4594.9			PICH		4921	2282.7		PICH	2736.9	BLM	1695.1		2736.9	1695.1
		BLM		7393.3			PICH		5637.9	2999.6		PICH	1326.1	BLM	855.1		1326.1	855.1
		PICH		3847.6			PICH		5930.5	3292.2		PICH	1500.6	BLM	0		1500.6	0
		BLM		8016.2			PICH		4306.2	1667.9		PICH	2203.3	BLM	689.6		2203.3	689.6
		PICH		5034.3			PICH		6603.8	3965.5		PICH	2195.1	BLM	1423.4		2195.1	1423.4
		BLM		8541.3		Background	BLM		7366.3			PICH	3284.5	BLM	2886.3		3284.5	2886.3
		PICH		4921			BLM		8231.5	865.2		PICH	3787.5	BLM	2036.5		3787.5	2036.5
		BLM		8707.6			BLM		8593.7	1227.4		PICH	4628.1	BLM	2631.5		4628.1	2631.5
		PICH		5637.9			BLM		7393.3	27		PICH	2057.6	BLM	961.5		2057.6	961.5
		BLM		8093.9			BLM		8016.2	649.9		PICH	1778.1	BLM	1048.2		1778.1	1048.2
		PICH		5930.5			BLM		8541.3	1175		PICH	1208.4	BLM	272		1208.4	272
		BLM		8370.2			BLM		8707.6	1341.3		PICH	4647	BLM	3104.9		4647	3104.9
		PICH		4306.2			BLM		8093.9	727.6		PICH	808.8	BLM	759.8		808.8	759.8
		BLM		7058.3			BLM		8370.2	1003.9		PICH	2266	BLM	1074.4		2266	1074.4
		PICH		6603.8			BLM		7058.3	0		PICH	1583.1	BLM	658		1583.1	658
		BLM		10425.1			BLM		10425.1	3058.8		PICH	842.4	BLM	0		842.4	0
												PICH	1255.1	BLM	0		1255.1	0
	deltaBLM + GFP-BLM-WT_ICRF_GFP-PICH-CEN-80 early ana.czi
	Background	PICH		3353.9		Background	PICH		3353.9			PICH	1487.6	BLM	366.3		1487.6	366.3
	Background	BLM		3975.3			PICH		4340.6	986.7		PICH	1932.9	BLM	1304.1		1932.9	1304.1
		PICH		4340.6			PICH		6831.1	3477.2
		BLM		3992.4			PICH		6368.2	3014.3		PICH	2313.5	BLM	1189.6		2313.5	1189.6
		PICH		6831.1			PICH		6509.9	3156		PICH	3704.9	BLM	364.7		3704.9	364.7
		BLM		4711.5			PICH		7899.6	4545.7		PICH	995.3	BLM	261.2		995.3	261.2
		PICH		6368.2			PICH		7525.1	4171.2
		BLM		4635.6			PICH		6540.1	3186.2		PICH	1648.3	BLM	1022		1648.3	1022
		PICH		6509.9			PICH		7092.7	3738.8		PICH	1656.4	BLM	1861.3		1656.4	1861.3
		BLM		4941.2			PICH		5433.1	2079.2		PICH	2059	BLM	1735.7		2059	1735.7
		PICH		7899.6			PICH		7625.3	4271.4
		BLM		5371.8			PICH		5017.4	1663.5		PICH	870.7	BLM	334.9		870.7	334.9
		PICH		7525.1			PICH		6987.8	3633.9		PICH	1705.7	BLM	734		1705.7	734
		BLM		5400.3			PICH		5581.4	2227.5		PICH	2091	BLM	1715.6		2091	1715.6
		PICH		6540.1		Background	BLM		3975.3			PICH	2042	BLM	1683.1		2042	1683.1
		BLM		5544			BLM		3992.4	17.1		PICH	1795	BLM	338.8		1795	338.8
		PICH		7092.7			BLM		4711.5	736.2		PICH	1530.9	BLM	1080.9		1530.9	1080.9
		BLM		5355.6			BLM		4635.6	660.3		PICH	2797.6	BLM	1155.7		2797.6	1155.7
		PICH		5433.1			BLM		4941.2	965.9		PICH	2076	BLM	2433		2076	2433
		BLM		4709.4			BLM		5371.8	1396.5		PICH	1470.7	BLM	478.5		1470.7	478.5
		PICH		7625.3			BLM		5400.3	1425		PICH	643.7	BLM	176.1		643.7	176.1
		BLM		4975.5			BLM		5544	1568.7		PICH	2229.6	BLM	3057		2229.6	3057
		PICH		5017.4			BLM		5355.6	1380.3		PICH	1111.5	BLM	1797.9		1111.5	1797.9
		BLM		4471.1			BLM		4709.4	734.1
		PICH		6987.8			BLM		4975.5	1000.2		PICH	1277.5	BLM	524.7		1277.5	524.7
		BLM		4419.1			BLM		4471.1	495.8		PICH	2384.2	BLM	2366.2		2384.2	2366.2
		PICH		5581.4			BLM		4419.1	443.8		PICH	1944.3	BLM	2291.2		1944.3	2291.2
		BLM		4603.4			BLM		4603.4	628.1		PICH	1628	BLM	2016.1		1628	2016.1
												PICH	2296.1	BLM	2338.7		2296.1	2338.7
	eltaBLM + GFP-BLM-WT_ICRF_GFP-PICH-CEN-79 early ana											PICH	1297.7	BLM	3049.4		1297.7	3049.4
	Background	PICH		2628.6		Background	PICH		2628.6			PICH	1615.6	BLM	2996.3		1615.6	2996.3
	Background	BLM		7413.3			PICH		5365.5	2736.9		PICH	964.8	BLM	2080.3		964.8	2080.3
		PICH		5365.5			PICH		3954.7	1326.1
		BLM		9108.4			PICH		4129.2	1500.6		PICH	1545.7	BLM	633.2		1545.7	633.2
		PICH		3954.7			PICH		4831.9	2203.3		PICH	882.5	BLM	742.4		882.5	742.4
		BLM		8268.4			PICH		4823.7	2195.1		PICH	1016.9	BLM	1068.3		1016.9	1068.3
		PICH		4129.2			PICH		5913.1	3284.5		PICH	1694	BLM	1215.4		1694	1215.4
		BLM		7330.3			PICH		6416.1	3787.5		PICH	2094.8	BLM	1659.3		2094.8	1659.3
		PICH		4831.9			PICH		7256.7	4628.1		PICH	1219.5	BLM	962.2		1219.5	962.2
		BLM		8102.9			PICH		4686.2	2057.6		PICH	1766.9	BLM	1955.5		1766.9	1955.5
		PICH		4823.7			PICH		4406.7	1778.1		PICH	1093.7	BLM	1882.2		1093.7	1882.2
		BLM		8836.7			PICH		3837	1208.4		PICH	1267.8	BLM	2000.3		1267.8	2000.3
		PICH		5913.1			PICH		7275.6	4647		PICH	506.8	BLM	948.1		506.8	948.1
		BLM		10299.6			PICH		3437.4	808.8
		PICH		6416.1			PICH		4894.6	2266		PICH	1768.2	BLM	1477.9		1768.2	1477.9
		BLM		9449.8			PICH		4211.7	1583.1		PICH	388.3	BLM	1301.6		388.3	1301.6
		PICH		7256.7			PICH		3471	842.4		PICH	1691.3	BLM	1040.4		1691.3	1040.4
		BLM		10044.8			PICH		3883.7	1255.1		PICH	1970.7	BLM	1318.8		1970.7	1318.8
		PICH		4686.2		Background	BLM		7413.3			PICH	1645.9	BLM	1681.5		1645.9	1681.5
		BLM		8374.8			BLM		9108.4	1695.1		PICH	1552.8	BLM	1910.3		1552.8	1910.3
		PICH		4406.7			BLM		8268.4	855.1		PICH	1121.4	BLM	1917.5		1121.4	1917.5
		BLM		8461.5			BLM		7330.3	0		PICH	1925.4	BLM	2554.4		1925.4	2554.4
		PICH		3837			BLM		8102.9	689.6
		BLM		7685.3			BLM		8836.7	1423.4		PICH	0	BLM	820.8		0	820.8
		PICH		7275.6			BLM		10299.6	2886.3		PICH	767.8	BLM	802.3		767.8	802.3
		BLM		10518.2			BLM		9449.8	2036.5		PICH	1057.9	BLM	696.8		1057.9	696.8
		PICH		3437.4			BLM		10044.8	2631.5		PICH	875	BLM	890.4		875	890.4
		BLM		8173.1			BLM		8374.8	961.5		PICH	1553	BLM	532.8		1553	532.8
		PICH		4894.6			BLM		8461.5	1048.2		PICH	1381.2	BLM	815.7		1381.2	815.7
		BLM		8487.7			BLM		7685.3	272		PICH	2559.4	BLM	900.2		2559.4	900.2
		PICH		4211.7			BLM		10518.2	3104.9		PICH	1752	BLM	204.3		1752	204.3
		BLM		8071.3			BLM		8173.1	759.8
		PICH		3471			BLM		8487.7	1074.4		PICH	933.6	BLM	0		933.6	0
		BLM		6867.4			BLM		8071.3	658		PICH	1548.4	BLM	0		1548.4	0
		PICH		3883.7			BLM		6867.4	0		PICH	2659.3	BLM	303.6		2659.3	303.6
		BLM		7015.8			BLM		7015.8	0		PICH	2925.1	BLM	1967.6		2925.1	1967.6
												PICH	2616.7	BLM	1599.4		2616.7	1599.4
												PICH	3030.1	BLM	608.9		3030.1	608.9
	deltaBLM + GFP-BLM-WT_ICRF_GFP-PICH-CEN-78 late ana.czi											PICH	3678.3	BLM	1296.5		3678.3	1296.5
	Background	PICH		2877.4		Background	PICH		2877.4			PICH	2835.7	BLM	2716.3		2835.7	2716.3
	Background	BLM		4971.3			PICH		4365	1487.6		PICH	4770.8	BLM	1619.4		4770.8	1619.4
		PICH		4365			PICH		4810.3	1932.9		PICH	3816.1	BLM	1506.1		3816.1	1506.1
		BLM		5337.6		Background	BLM		4971.3			PICH	2057.7	BLM	1120.1		2057.7	1120.1
		PICH		4810.3			BLM		5337.6	366.3
		BLM		6275.4			BLM		6275.4	1304.1		PICH	2982.4	BLM	1272		2982.4	1272
												PICH	2603.8	BLM	1847.8		2603.8	1847.8
	deltaBLM + GFP-BLM-WT_ICRF_GFP-PICH-CEN-76 late ana.czi											PICH	3945.1	BLM	1489.7		3945.1	1489.7
	Background	PICH		2572.6		Background	PICH		2572.6			PICH	3426.1	BLM	1808.5		3426.1	1808.5
	Background	BLM		9119.3			PICH		4886.1	2313.5
		PICH		4886.1			PICH		6277.5	3704.9		PICH	2080.7	BLM	955.8		2080.7	955.8
		BLM		10308.9			PICH		3567.9	995.3		PICH	1777.3	BLM	588.2		1777.3	588.2
		PICH		6277.5		Background	BLM		9119.3			PICH	3178.6	BLM	679.9		3178.6	679.9
		BLM		9484			BLM		10308.9	1189.6		PICH	3231.6	BLM	986.1		3231.6	986.1
		PICH		3567.9			BLM		9484	364.7		PICH	95.4	BLM	0		95.4	0
		BLM		9380.5			BLM		9380.5	261.2
												PICH	1556.9	BLM	1679.6		1556.9	1679.6
	deltaBLM + GFP-BLM-WT_ICRF_GFP-PICH-CEN-75 late ana.czi											PICH	1272.5	BLM	348.9		1272.5	348.9
	Background	PICH		2158.9		Background	PICH		2158.9
	Background	BLM		8236.6			PICH		3807.2	1648.3		PICH	2745.9	BLM	2682.8		2745.9	2682.8
		PICH		3807.2			PICH		3815.3	1656.4		PICH	2451.2	BLM	1731.1		2451.2	1731.1
		BLM		9258.6			PICH		4217.9	2059		PICH	4384.4	BLM	2352.6		4384.4	2352.6
		PICH		3815.3		Background	BLM		8236.6			PICH	2533	BLM	1369.8		2533	1369.8
		BLM		10097.9			BLM		9258.6	1022
		PICH		4217.9			BLM		10097.9	1861.3		PICH	5115.8	BLM	573.6		5115.8	573.6
		BLM		9972.3			BLM		9972.3	1735.7		PICH	5389.5	BLM	1086.1		5389.5	1086.1
												PICH	6229.7	BLM	1504.8		6229.7	1504.8
	deltaBLM + GFP-BLM-WT_ICRF_GFP-PICH-CEN-74 early ana.czi											PICH	5692.7	BLM	1076.8		5692.7	1076.8
	Background	PICH		2992.9		Background	PICH		2992.9			PICH	4905.8	BLM	1135.2		4905.8	1135.2
	Background	BLM		9124.1			PICH		3863.6	870.7		PICH	5320.8	BLM	2156.4		5320.8	2156.4
		PICH		3863.6			PICH		4698.6	1705.7		PICH	5771.6	BLM	1076.7		5771.6	1076.7
		BLM		9459			PICH		5083.9	2091
		PICH		4698.6			PICH		5034.9	2042		PICH	1423	BLM	330.9		1423	330.9
		BLM		9858.1			PICH		4787.9	1795		PICH	545.7	BLM	2146.6		545.7	2146.6
		PICH		5083.9			PICH		4523.8	1530.9
		BLM		10839.7			PICH		5790.5	2797.6		PICH	6701.8	BLM	2564.3		6701.8	2564.3
		PICH		5034.9			PICH		5068.9	2076		PICH	6840.5	BLM	1418.6		6840.5	1418.6
		BLM		10807.2			PICH		4463.6	1470.7		PICH	2182.8	BLM	77.5		2182.8	77.5
		PICH		4787.9			PICH		3636.6	643.7
		BLM		9462.9			PICH		5222.5	2229.6		PICH	2897.9	BLM	1191.5		2897.9	1191.5
		PICH		4523.8			PICH		4104.4	1111.5		PICH	3249	BLM	2104.8		3249	2104.8
		BLM		10205		Background	BLM		9124.1
		PICH		5790.5			BLM		9459	334.9		PICH	2411.2	BLM	1502.4		2411.2	1502.4
		BLM		10279.8			BLM		9858.1	734		PICH	1940.4	BLM	284.2		1940.4	284.2
		PICH		5068.9			BLM		10839.7	1715.6		PICH	1273.3	BLM	993.7		1273.3	993.7
		BLM		11557.1			BLM		10807.2	1683.1		PICH	1125.5	BLM	470.4		1125.5	470.4
		PICH		4463.6			BLM		9462.9	338.8		PICH	1279.2	BLM	738.3		1279.2	738.3
		BLM		9602.6			BLM		10205	1080.9		PICH	2333.4	BLM	1015.5		2333.4	1015.5
		PICH		3636.6			BLM		10279.8	1155.7		PICH	2025.4	BLM	898.5		2025.4	898.5
		BLM		9300.2			BLM		11557.1	2433		PICH	2085.1	BLM	363.4		2085.1	363.4
		PICH		5222.5			BLM		9602.6	478.5		PICH	2585.9	BLM	674.3		2585.9	674.3
		BLM		12181.1			BLM		9300.2	176.1
		PICH		4104.4			BLM		12181.1	3057		PICH	164.4	BLM	631.5		164.4	631.5
		BLM		10922			BLM		10922	1797.9		PICH	1573.2	BLM	645.5		1573.2	645.5
												PICH	532.1	BLM	58.5		532.1	58.5
	deltaBLM + GFP-BLM-WT_ICRF_GFP-PICH-CEN-73 mid ana.czi											PICH	2525.1	BLM	391.7		2525.1	391.7
	Background	PICH		2321.9		Background	PICH		2321.9			PICH	1721.3	BLM	178.1		1721.3	178.1
	Background	BLM		9006.2			PICH		3599.4	1277.5
		PICH		3599.4			PICH		4706.1	2384.2		PICH	3711.8	BLM	895.9		3711.8	895.9
		BLM		9530.9			PICH		4266.2	1944.3		PICH	5726.5	BLM	670.3		5726.5	670.3
		PICH		4706.1			PICH		3949.9	1628		PICH	5114.1	BLM	593.8		5114.1	593.8
		BLM		11372.4			PICH		4618	2296.1		PICH	5011.4	BLM	492.4		5011.4	492.4
		PICH		4266.2			PICH		3619.6	1297.7		PICH	5208.1	BLM	625.3		5208.1	625.3
		BLM		11297.4			PICH		3937.5	1615.6		PICH	4337.9	BLM	478.6		4337.9	478.6
		PICH		3949.9			PICH		3286.7	964.8		PICH	5312.7	BLM	567.7		5312.7	567.7
		BLM		11022.3		Background	BLM		9006.2			PICH	4147.2	BLM	459.3		4147.2	459.3
		PICH		4618			BLM		9530.9	524.7		PICH	4737	BLM	842.1		4737	842.1
		BLM		11344.9			BLM		11372.4	2366.2		PICH	4058.6	BLM	590.8		4058.6	590.8
		PICH		3619.6			BLM		11297.4	2291.2		PICH	4850	BLM	502		4850	502
		BLM		12055.6			BLM		11022.3	2016.1		PICH	3159.9	BLM	1071.2		3159.9	1071.2
		PICH		3937.5			BLM		11344.9	2338.7		PICH	2972.2	BLM	933.1		2972.2	933.1
		BLM		12002.5			BLM		12055.6	3049.4
		PICH		3286.7			BLM		12002.5	2996.3		PICH	2091.6	BLM	1744.8		2091.6	1744.8
		BLM		11086.5			BLM		11086.5	2080.3		PICH	2532.2	BLM	850.3		2532.2	850.3
												PICH	2133.5	BLM	1021.2		2133.5	1021.2
	deltaBLM + GFP-BLM-WT_ICRF_GFP-PICH-CEN-72 mid ana.czi
	Background	PICH		3411.5		Background	PICH		3411.5			PICH	1729.7	BLM	830		1729.7	830
	Background	BLM		9229.8			PICH		4957.2	1545.7		PICH	2807.3	BLM	1481.2		2807.3	1481.2
		PICH		4957.2			PICH		4294	882.5		PICH	2818.3	BLM	1095		2818.3	1095
		BLM		9863			PICH		4428.4	1016.9		PICH	2685.4	BLM	1029.4		2685.4	1029.4
		PICH		4294			PICH		5105.5	1694		PICH	1877.5	BLM	43.6		1877.5	43.6
		BLM		9972.2			PICH		5506.3	2094.8
		PICH		4428.4			PICH		4631	1219.5		PICH	1544.4	BLM	1080.8		1544.4	1080.8
		BLM		10298.1			PICH		5178.4	1766.9		PICH	2068.2	BLM	1635.2		2068.2	1635.2
		PICH		5105.5			PICH		4505.2	1093.7		PICH	2876.7	BLM	1664.1		2876.7	1664.1
		BLM		10445.2			PICH		4679.3	1267.8		PICH	4390.7	BLM	2161.9		4390.7	2161.9
		PICH		5506.3			PICH		3918.3	506.8		PICH	1775.5	BLM	634.6		1775.5	634.6
		BLM		10889.1		Background	BLM		9229.8
		PICH		4631			BLM		9863	633.2		PICH	5934.4	BLM	2050.6		5934.4	2050.6
		BLM		10192			BLM		9972.2	742.4		PICH	4981.3	BLM	1747.1		4981.3	1747.1
		PICH		5178.4			BLM		10298.1	1068.3		PICH	7218.3	BLM	1419.2		7218.3	1419.2
		BLM		11185.3			BLM		10445.2	1215.4		PICH	5930.1	BLM	368.1		5930.1	368.1
		PICH		4505.2			BLM		10889.1	1659.3		PICH	3662.9	BLM	1227.8		3662.9	1227.8
		BLM		11112			BLM		10192	962.2		PICH	3654.9	BLM	1077.1		3654.9	1077.1
		PICH		4679.3			BLM		11185.3	1955.5		PICH	5749.8	BLM	1538.3		5749.8	1538.3
		BLM		11230.1			BLM		11112	1882.2		PICH	7333	BLM	1117.6		7333	1117.6
		PICH		3918.3			BLM		11230.1	2000.3		PICH	6288.7	BLM	2720.6		6288.7	2720.6
		BLM		10177.9			BLM		10177.9	948.1		PICH	2911.8	BLM	1340.1		2911.8	1340.1
												PICH	2970.9	BLM	1628		2970.9	1628
	deltaBLM + GFP-BLM-WT_ICRF_GFP-PICH-CEN-71 mid ana.czi											PICH	2104.1	BLM	2186.4		2104.1	2186.4
	Background	PICH		3261.1		Background	PICH		3261.1			PICH	2191.6	BLM	1157.2		2191.6	1157.2
	Background	BLM		6645			PICH		5029.3	1768.2		PICH	4085.7	BLM	199.8		4085.7	199.8
		PICH		5029.3			PICH		3649.4	388.3		PICH	883.6	BLM	664		883.6	664
		BLM		8122.9			PICH		4952.4	1691.3
		PICH		3649.4			PICH		5231.8	1970.7		PICH	1871.7	BLM	767.7		1871.7	767.7
		BLM		7946.6			PICH		4907	1645.9		PICH	2467.3	BLM	1150.4		2467.3	1150.4
		PICH		4952.4			PICH		4813.9	1552.8		PICH	2728	BLM	973.3		2728	973.3
		BLM		7685.4			PICH		4382.5	1121.4		PICH	1266.9	BLM	793.5		1266.9	793.5
		PICH		5231.8			PICH		5186.5	1925.4		PICH	3141.1	BLM	1149		3141.1	1149
		BLM		7963.8		Background	BLM		6645			PICH	1809.1	BLM	701.3		1809.1	701.3
		PICH		4907			BLM		8122.9	1477.9
		BLM		8326.5			BLM		7946.6	1301.6		PICH	1097.8	BLM	113		1097.8	113
		PICH		4813.9			BLM		7685.4	1040.4		PICH	1592.8	BLM	574		1592.8	574
		BLM		8555.3			BLM		7963.8	1318.8		PICH	1572.3	BLM	0		1572.3	0
		PICH		4382.5			BLM		8326.5	1681.5		PICH	3006.9	BLM	2760.3		3006.9	2760.3
		BLM		8562.5			BLM		8555.3	1910.3		PICH	2478.4	BLM	231.6		2478.4	231.6
		PICH		5186.5			BLM		8562.5	1917.5		PICH	1612	BLM	0		1612	0
		BLM		9199.4			BLM		9199.4	2554.4
												PICH	1939.1	BLM	1187.9		1939.1	1187.9
	deltaBLM + GFP-BLM-WT_ICRF_GFP-PICH-CEN-69 mid ana.czi											PICH	4416.6	BLM	3437.9		4416.6	3437.9
	Background	PICH		4669.9		Background	PICH		4669.9			PICH	3846.3	BLM	2513		3846.3	2513
	Background	BLM		7398.9			PICH		4567.7	0		PICH	3958.6	BLM	2853.8		3958.6	2853.8
		PICH		4567.7			PICH		5437.7	767.8		PICH	4678.4	BLM	3223.1		4678.4	3223.1
		BLM		8219.7			PICH		5727.8	1057.9		PICH	5052.9	BLM	2898.2		5052.9	2898.2
		PICH		5437.7			PICH		5544.9	875		PICH	3932.7	BLM	1592.2		3932.7	1592.2
		BLM		8201.2			PICH		6222.9	1553		PICH	4018.2	BLM	1480.4		4018.2	1480.4
		PICH		5727.8			PICH		6051.1	1381.2		PICH	3216.4	BLM	854.6		3216.4	854.6
		BLM		8095.7			PICH		7229.3	2559.4		PICH	3118.9	BLM	462.7		3118.9	462.7
		PICH		5544.9			PICH		6421.9	1752		PICH	3128.3	BLM	778.6		3128.3	778.6
		BLM		8289.3		Background	BLM		7398.9
		PICH		6222.9			BLM		8219.7	820.8		PICH	1324.1	BLM	270.8		1324.1	270.8
		BLM		7931.7			BLM		8201.2	802.3		PICH	2667	BLM	701.7		2667	701.7
		PICH		6051.1			BLM		8095.7	696.8		PICH	3099.6	BLM	336.7		3099.6	336.7
		BLM		8214.6			BLM		8289.3	890.4		PICH	3606.6	BLM	658.9		3606.6	658.9
		PICH		7229.3			BLM		7931.7	532.8		PICH	2840	BLM	1601		2840	1601
		BLM		8299.1			BLM		8214.6	815.7		PICH	1727	BLM	765.1		1727	765.1
		PICH		6421.9			BLM		8299.1	900.2		PICH	2009.3	BLM	689.9		2009.3	689.9
		BLM		7603.2			BLM		7603.2	204.3		PICH	2398.1	BLM	828.1		2398.1	828.1
												PICH	2695.6	BLM	1210.2		2695.6	1210.2
	deltaBLM + GFP-BLM-WT_ICRF_GFP-PICH-CEN-68 early ana.czi											PICH	937.7	BLM	512.7		937.7	512.7
	Background	PICH		3005.4		Background	PICH		3005.4			PICH	2518.8	BLM	973.4		2518.8	973.4
	Background	BLM		7217			PICH		3939	933.6		PICH	1104.8	BLM	270.2		1104.8	270.2
		PICH		3939			PICH		4553.8	1548.4		PICH	4100.4	BLM	841.8		4100.4	841.8
		BLM		6621.2			PICH		5664.7	2659.3
		PICH		4553.8			PICH		5930.5	2925.1		PICH	2655.6	BLM	366.3		2655.6	366.3
		BLM		6450.6			PICH		5622.1	2616.7		PICH	3486	BLM	563.6		3486	563.6
		PICH		5664.7			PICH		6035.5	3030.1		PICH	3661.9	BLM	855.5		3661.9	855.5
		BLM		7520.6			PICH		6683.7	3678.3		PICH	2549.1	BLM	558.4		2549.1	558.4
		PICH		5930.5			PICH		5841.1	2835.7		PICH	2336.3	BLM	319.4		2336.3	319.4
		BLM		9184.6			PICH		7776.2	4770.8
		PICH		5622.1			PICH		6821.5	3816.1		PICH	1397.9	BLM	1203.1		1397.9	1203.1
		BLM		8816.4			PICH		5063.1	2057.7		PICH	1744.8	BLM	1316.9		1744.8	1316.9
		PICH		6035.5		Background	BLM		7217			PICH	1155.4	BLM	1381.7		1155.4	1381.7
		BLM		7825.9			BLM		6621.2	0
		PICH		6683.7			BLM		6450.6	0		PICH	1985.2	BLM	980.5		1985.2	980.5
		BLM		8513.5			BLM		7520.6	303.6		PICH	1279.1	BLM	925.7		1279.1	925.7
		PICH		5841.1			BLM		9184.6	1967.6
		BLM		9933.3			BLM		8816.4	1599.4		PICH	1410.4	BLM	50.2		1410.4	50.2
		PICH		7776.2			BLM		7825.9	608.9		PICH	2132.4	BLM	1353.8		2132.4	1353.8
		BLM		8836.4			BLM		8513.5	1296.5		PICH	1513.4	BLM	397.6		1513.4	397.6
		PICH		6821.5			BLM		9933.3	2716.3
		BLM		8723.1			BLM		8836.4	1619.4		PICH	523.3	BLM	609.3		523.3	609.3
		PICH		5063.1			BLM		8723.1	1506.1		PICH	638.7	BLM	1766.5		638.7	1766.5
		BLM		8337.1			BLM		8337.1	1120.1		PICH	707.5	BLM	2098.6		707.5	2098.6
												PICH	1825.7	BLM	2587.3		1825.7	2587.3
	deltaBLM + GFP-BLM-WT_ICRF_GFP-PICH-CEN-66 late ana.czi											PICH	979.5	BLM	1108.2		979.5	1108.2
	Background	PICH		1845.6		Background	PICH		1845.6			PICH	447.3	BLM	66.9		447.3	66.9
	Background	BLM		16254.2			PICH		4828	2982.4
		PICH		4828			PICH		4449.4	2603.8		PICH	1123.4	BLM	613.4		1123.4	613.4
		BLM		17526.2			PICH		5790.7	3945.1		PICH	2207	BLM	771.7		2207	771.7
		PICH		4449.4			PICH		5271.7	3426.1		PICH	2638.2	BLM	789.7		2638.2	789.7
		BLM		18102		Background	BLM		16254.2			PICH	2502.2	BLM	390.1		2502.2	390.1
		PICH		5790.7			BLM		17526.2	1272		PICH	2343.9	BLM	2379.4		2343.9	2379.4
		BLM		17743.9			BLM		18102	1847.8		PICH	1602.3	BLM	1942.2		1602.3	1942.2
		PICH		5271.7			BLM		17743.9	1489.7
		BLM		18062.7			BLM		18062.7	1808.5		PICH	2243.8	BLM	596.1		2243.8	596.1
												PICH	2161.5	BLM	1764.8		2161.5	1764.8
	deltaBLM + GFP-BLM-WT_ICRF_GFP-PICH-CEN-65 mid ana.czi											PICH	2792.7	BLM	1844.3		2792.7	1844.3
	Background	PICH		4173.7		Background	PICH		4173.7			PICH	2828.8	BLM	2301.1		2828.8	2301.1
	Background	BLM		7850.5			PICH		6254.4	2080.7		PICH	2220.9	BLM	2388.8		2220.9	2388.8
		PICH		6254.4			PICH		5951	1777.3		PICH	2331	BLM	565.9		2331	565.9
		BLM		8806.3			PICH		7352.3	3178.6		PICH	2740.8	BLM	925		2740.8	925
		PICH		5951			PICH		7405.3	3231.6		PICH	1643.7	BLM	1291.1		1643.7	1291.1
		BLM		8438.7			PICH		4269.1	95.4		PICH	1503.5	BLM	1559.2		1503.5	1559.2
		PICH		7352.3		Background	BLM		7850.5			PICH	1515.7	BLM	840		1515.7	840
		BLM		8530.4			BLM		8806.3	955.8
		PICH		7405.3			BLM		8438.7	588.2		PICH	1214.7	BLM	721.8		1214.7	721.8
		BLM		8836.6			BLM		8530.4	679.9		PICH	1112	BLM	200.2		1112	200.2
		PICH		4269.1			BLM		8836.6	986.1		PICH	2032.3	BLM	1742.9		2032.3	1742.9
		BLM		6879.9			BLM		6879.9	0
												PICH	2529.5	BLM	781.9		2529.5	781.9
	deltaBLM + GFP-BLM-WT_ICRF_GFP-PICH-CEN-63 late ana.czi											PICH	1913	BLM	890.3		1913	890.3
	Background	PICH		2483.1		Background	PICH		2483.1			PICH	4967.7	BLM	2343.7		4967.7	2343.7
	Background	BLM		8106.7			PICH		4040	1556.9		PICH	4545.7	BLM	930.6		4545.7	930.6
		PICH		4040			PICH		3755.6	1272.5		PICH	3960.8	BLM	1416.1		3960.8	1416.1
		BLM		9786.3		Background	BLM		8106.7			PICH	3303.5	BLM	1915.4		3303.5	1915.4
		PICH		3755.6			BLM		9786.3	1679.6		PICH	2925.1	BLM	1806.2		2925.1	1806.2
		BLM		8455.6			BLM		8455.6	348.9		PICH	3129.8	BLM	720.6		3129.8	720.6
												PICH	4705.3	BLM	1043		4705.3	1043
												PICH	4488.7	BLM	1447.3		4488.7	1447.3
	deltaBLM + GFP-BLM-WT_ICRF_GFP-PICH-CEN-61 mid ana.czi											PICH	5167.6	BLM	2434.4		5167.6	2434.4
	Background	PICH		3628.5		Background	PICH		3628.5			PICH	3172.6	BLM	2438.5		3172.6	2438.5
	Background	BLM		8886.9			PICH		6374.4	2745.9		PICH	3015	BLM	359.3		3015	359.3
		PICH		6374.4			PICH		6079.7	2451.2		PICH	2335.6	BLM	105.5		2335.6	105.5
		BLM		11569.7			PICH		8012.9	4384.4		PICH	2644.4	BLM	759.4		2644.4	759.4
		PICH		6079.7			PICH		6161.5	2533		PICH	3611	BLM	299.8		3611	299.8
		BLM		10618		Background	BLM		8886.9
		PICH		8012.9			BLM		11569.7	2682.8		PICH	1475.7	BLM	2034.6		1475.7	2034.6
		BLM		11239.5			BLM		10618	1731.1		PICH	1822.4	BLM	2480.5		1822.4	2480.5
		PICH		6161.5			BLM		11239.5	2352.6
		BLM		10256.7			BLM		10256.7	1369.8		PICH	1166.2	BLM	1602		1166.2	1602
												PICH	1001.5	BLM	879.5		1001.5	879.5
	deltaBLM + GFP-BLM-WT_ICRF_GFP-PICH-CEN-60 mid ana.czi											PICH	877.8	BLM	557.3		877.8	557.3
	Background	PICH		2860.6		Background	PICH		2860.6			PICH	1119.9	BLM	882.6		1119.9	882.6
	Background	BLM		13965.4			PICH		5115.8	5115.8		PICH	1005.5	BLM	1678		1005.5	1678
		PICH		5115.8			PICH		5389.5	5389.5
		BLM		14539			PICH		6229.7	6229.7		PICH	1748.3	BLM	2027.5		1748.3	2027.5
		PICH		5389.5			PICH		5692.7	5692.7		PICH	1342	BLM	1436		1342	1436
		BLM		15051.5			PICH		4905.8	4905.8		PICH	1817.3	BLM	2186.6		1817.3	2186.6
		PICH		6229.7			PICH		5320.8	5320.8		PICH	2090.6	BLM	3710.1		2090.6	3710.1
		BLM		15470.2			PICH		5771.6	5771.6		PICH	1674.2	BLM	3021.2		1674.2	3021.2
		PICH		5692.7		Background	BLM		13965.4			PICH	864.4	BLM	1818.3		864.4	1818.3
		BLM		15042.2			BLM		14539	573.6
		PICH		4905.8			BLM		15051.5	1086.1		PICH	3099.2	BLM	845.6		3099.2	845.6
		BLM		15100.6			BLM		15470.2	1504.8		PICH	3366.5	BLM	718.1		3366.5	718.1
		PICH		5320.8			BLM		15042.2	1076.8		PICH	3673.4	BLM	466.9		3673.4	466.9
		BLM		16121.8			BLM		15100.6	1135.2		PICH	2180.4	BLM	-92.8		2180.4	0
		PICH		5771.6			BLM		16121.8	2156.4		PICH	2356.8	BLM	1038.9		2356.8	1038.9
		BLM		15042.1			BLM		15042.1	1076.7
												PICH	384.2	BLM	0		384.2	0
												PICH	454.5	BLM	0		454.5	0
	deltaBLM + GFP-BLM-WT_ICRF_GFP-PICH-CEN-58 late ana.czi											PICH	1952.6	BLM	2142.5		1952.6	2142.5
	Background	PICH		2107.4		Background	PICH		2107.4			PICH	1978.4	BLM	987.8		1978.4	987.8
	Background	BLM		10463.3			PICH		3530.4	1423		PICH	1642.1	BLM	352.7		1642.1	352.7
		PICH		3530.4			PICH		2653.1	545.7		PICH	896.1	BLM	460.1		896.1	460.1
		BLM		10794.2		Background	BLM		10463.3			PICH	616.8	BLM	0		616.8	0
		PICH		2653.1			BLM		10794.2	330.9
		BLM		12609.9			BLM		12609.9	2146.6		PICH	2547.9	BLM	2565.8		2547.9	2565.8
												PICH	6724.4	BLM	4583.4		6724.4	4583.4
	deltaBLM + GFP-BLM-WT_ICRF_GFP-PICH-CEN-57 late ana.czi											PICH	3109.3	BLM	1370		3109.3	1370
	Background	PICH		2897.1		Background	PICH		2897.1			PICH	2921.3	BLM	1491.4		2921.3	1491.4
	Background	BLM		6610.3			PICH		9598.9	6701.8
		PICH		9598.9			PICH		9737.6	6840.5		PICH	92.9	BLM	0		92.9	0
		BLM		9174.6			PICH		5079.9	2182.8		PICH	1336.1	BLM	1369.8		1336.1	1369.8
		PICH		9737.6		Background	BLM		6610.3			PICH	4141.1	BLM	2002.5		4141.1	2002.5
		BLM		8028.9			BLM		9174.6	2564.3		PICH	1178.8	BLM	909.6		1178.8	909.6
		PICH		5079.9			BLM		8028.9	1418.6		PICH	1343.5	BLM	-610.7		1343.5	0
		BLM		6687.8			BLM		6687.8	77.5		PICH	2149.6	BLM	2369.1		2149.6	2369.1
												PICH	1436.6	BLM	1123.4		1436.6	1123.4
	deltaBLM + GFP-BLM-WT_ICRF_GFP-PICH-CEN-56 late ana.czi											PICH	697.9	BLM	1338.2		697.9	1338.2
	Background	PICH		2089.6		Background	PICH		2089.6
	Background	BLM		19013.7			PICH		4987.5	2897.9		PICH	1242.2	BLM	1123.1		1242.2	1123.1
		PICH		4987.5			PICH		5338.6	3249		PICH	1974.4	BLM	1308.1		1974.4	1308.1
		BLM		20205.2		Background	BLM		19013.7			PICH	2252.9	BLM	959.8		2252.9	959.8
		PICH		5338.6			BLM		20205.2	1191.5		PICH	2132.1	BLM	561.6		2132.1	561.6
		BLM		21118.5			BLM		21118.5	2104.8		PICH	2235.1	BLM	558.5		2235.1	558.5
												PICH	2093.9	BLM	1040.9		2093.9	1040.9
	deltaBLM + GFP-BLM-WT_ICRF_GFP-PICH-CEN-55 mid ana.czi											PICH	1633.5	BLM	833.2		1633.5	833.2
	Background	PICH		2428.4		Background	PICH		2428.4			PICH	2037.2	BLM	1383.9		2037.2	1383.9
	Background	BLM		6230.7			PICH		4839.6	2411.2		PICH	1014.4	BLM	843.2		1014.4	843.2
		PICH		4839.6			PICH		4368.8	1940.4		PICH	228.8	BLM	939.6		228.8	939.6
		BLM		7733.1			PICH		3701.7	1273.3
		PICH		4368.8			PICH		3553.9	1125.5
		BLM		6514.9			PICH		3707.6	1279.2
		PICH		3701.7			PICH		4761.8	2333.4
		BLM		7224.4			PICH		4453.8	2025.4
		PICH		3553.9			PICH		4513.5	2085.1
		BLM		6701.1			PICH		5014.3	2585.9
		PICH		3707.6		Background	BLM		6230.7
		BLM		6969			BLM		7733.1	1502.4
		PICH		4761.8			BLM		6514.9	284.2
		BLM		7246.2			BLM		7224.4	993.7
		PICH		4453.8			BLM		6701.1	470.4
		BLM		7129.2			BLM		6969	738.3
		PICH		4513.5			BLM		7246.2	1015.5
		BLM		6594.1			BLM		7129.2	898.5
		PICH		5014.3			BLM		6594.1	363.4
		BLM		6905			BLM		6905	674.3
	deltaBLM + GFP-BLM-WT_ICRF_GFP-PICH-CEN-53 mid ana.czi
	Background	PICH		3898.7		Background	PICH		3898.7
	Background	BLM		8649.1			PICH		4063.1	164.4
		PICH		4063.1			PICH		5471.9	1573.2
		BLM		9280.6			PICH		4430.8	532.1
		PICH		5471.9			PICH		6423.8	2525.1
		BLM		9294.6			PICH		5620	1721.3
		PICH		4430.8		Background	BLM		8649.1
		BLM		8707.6			BLM		9280.6	631.5
		PICH		6423.8			BLM		9294.6	645.5
		BLM		9040.8			BLM		8707.6	58.5
		PICH		5620			BLM		9040.8	391.7
		BLM		8827.2			BLM		8827.2	178.1
	deltaBLM + GFP-BLM-WT_ICRF_GFP-PICH-CEN-52 early ana.czi
	Background	PICH		2606.9		Background	PICH		2606.9
	Background	BLM		4569.2			PICH		6318.7	3711.8
		PICH		6318.7			PICH		8333.4	5726.5
		BLM		5465.1			PICH		7721	5114.1
		PICH		8333.4			PICH		7618.3	5011.4
		BLM		5239.5			PICH		7815	5208.1
		PICH		7721			PICH		6944.8	4337.9
		BLM		5163			PICH		7919.6	5312.7
		PICH		7618.3			PICH		6754.1	4147.2
		BLM		5061.6			PICH		7343.9	4737
		PICH		7815			PICH		6665.5	4058.6
		BLM		5194.5			PICH		7456.9	4850
		PICH		6944.8			PICH		5766.8	3159.9
		BLM		5047.8			PICH		5579.1	2972.2
		PICH		7919.6		Background	BLM		4569.2
		BLM		5136.9			BLM		5465.1	895.9
		PICH		6754.1			BLM		5239.5	670.3
		BLM		5028.5			BLM		5163	593.8
		PICH		7343.9			BLM		5061.6	492.4
		BLM		5411.3			BLM		5194.5	625.3
		PICH		6665.5			BLM		5047.8	478.6
		BLM		5160			BLM		5136.9	567.7
		PICH		7456.9			BLM		5028.5	459.3
		BLM		5071.2			BLM		5411.3	842.1
		PICH		5766.8			BLM		5160	590.8
		BLM		5640.4			BLM		5071.2	502
		PICH		5579.1			BLM		5640.4	1071.2
		BLM		5502.3			BLM		5502.3	933.1
	deltaBLM + GFP-BLM-WT_ICRF_GFP-PICH-CEN-51 mid ana.czi
	Background	PICH		3016.2		Background	PICH		3016.2
	Background	BLM		14480.2			PICH		5107.8	2091.6
		PICH		5107.8			PICH		5548.4	2532.2
		BLM		16225			PICH		5149.7	2133.5
		PICH		5548.4		Background	BLM		14480.2
		BLM		15330.5			BLM		16225	1744.8
		PICH		5149.7			BLM		15330.5	850.3
		BLM		15501.4			BLM		15501.4	1021.2
	deltaBLM + GFP-BLM-WT_ICRF_GFP-PICH-CEN-50 mid ana.czi
	Background	PICH		3478.1		Background	PICH		3478.1
	Background	BLM		7454.5			PICH		5207.8	1729.7
		PICH		5207.8			PICH		6285.4	2807.3
		BLM		8284.5			PICH		6296.4	2818.3
		PICH		6285.4			PICH		6163.5	2685.4
		BLM		8935.7			PICH		5355.6	1877.5
		PICH		6296.4		Background	BLM		7454.5
		BLM		8549.5			BLM		8284.5	830
		PICH		6163.5			BLM		8935.7	1481.2
		BLM		8483.9			BLM		8549.5	1095
		PICH		5355.6			BLM		8483.9	1029.4
		BLM		7498.1			BLM		7498.1	43.6
	deltaBLM + GFP-BLM-WT_ICRF_GFP-PICH-CEN-49 mid ana.czi
	Background	PICH		2126.9		Background	PICH		2126.9
	Background	BLM		4422.4			PICH		3671.3	1544.4
		PICH		3671.3			PICH		4195.1	2068.2
		BLM		5503.2			PICH		5003.6	2876.7
		PICH		4195.1			PICH		6517.6	4390.7
		BLM		6057.6			PICH		3902.4	1775.5
		PICH		5003.6		Background	BLM		4422.4
		BLM		6086.5			BLM		5503.2	1080.8
		PICH		6517.6			BLM		6057.6	1635.2
		BLM		6584.3			BLM		6086.5	1664.1
		PICH		3902.4			BLM		6584.3	2161.9
		BLM		5057			BLM		5057	634.6
	deltaBLM + GFP-BLM-WT_ICRF_GFP-PICH-CEN-48 early ana.czi
	Background	PICH		4103		Background	PICH		4103
	Background	BLM		7840.2			PICH		10037.4	5934.4
		PICH		10037.4			PICH		9084.3	4981.3
		BLM		9890.8			PICH		11321.3	7218.3
		PICH		9084.3			PICH		10033.1	5930.1
		BLM		9587.3			PICH		7765.9	3662.9
		PICH		11321.3			PICH		7757.9	3654.9
		BLM		9259.4			PICH		9852.8	5749.8
		PICH		10033.1			PICH		11436	7333
		BLM		8208.3			PICH		10391.7	6288.7
		PICH		7765.9			PICH		7014.8	2911.8
		BLM		9068			PICH		7073.9	2970.9
		PICH		7757.9			PICH		6207.1	2104.1
		BLM		8917.3			PICH		6294.6	2191.6
		PICH		9852.8			PICH		8188.7	4085.7
		BLM		9378.5			PICH		4986.6	883.6
		PICH		11436		Background	BLM		7840.2
		BLM		8957.8			BLM		9890.8	2050.6
		PICH		10391.7			BLM		9587.3	1747.1
		BLM		10560.8			BLM		9259.4	1419.2
		PICH		7014.8			BLM		8208.3	368.1
		BLM		9180.3			BLM		9068	1227.8
		PICH		7073.9			BLM		8917.3	1077.1
		BLM		9468.2			BLM		9378.5	1538.3
		PICH		6207.1			BLM		8957.8	1117.6
		BLM		10026.6			BLM		10560.8	2720.6
		PICH		6294.6			BLM		9180.3	1340.1
		BLM		8997.4			BLM		9468.2	1628
		PICH		8188.7			BLM		10026.6	2186.4
		BLM		8040			BLM		8997.4	1157.2
		PICH		4986.6			BLM		8040	199.8
		BLM		8504.2			BLM		8504.2	664
	deltaBLM + GFP-BLM-WT_ICRF_GFP-PICH-CEN-47 mid ana.czi
	Background	PICH		3158.9		Background	PICH		3158.9
	Background	BLM		5354			PICH		5030.6	1871.7
		PICH		5030.6			PICH		5626.2	2467.3
		BLM		6121.7			PICH		5886.9	2728
		PICH		5626.2			PICH		4425.8	1266.9
		BLM		6504.4			PICH		6300	3141.1
		PICH		5886.9			PICH		4968	1809.1
		BLM		6327.3		Background	BLM		5354
		PICH		4425.8			BLM		6121.7	767.7
		BLM		6147.5			BLM		6504.4	1150.4
		PICH		6300			BLM		6327.3	973.3
		BLM		6503			BLM		6147.5	793.5
		PICH		4968			BLM		6503	1149
		BLM		6055.3			BLM		6055.3	701.3
	deltaBLM + GFP-BLM-WT_ICRF_GFP-PICH-CEN-46 mid ana.czi
	Background	PICH		2880.1		Background	PICH		2880.1
	Background	BLM		11311.7			PICH		3977.9	1097.8
		PICH		3977.9			PICH		4472.9	1592.8
		BLM		11424.7			PICH		4452.4	1572.3
		PICH		4472.9			PICH		5887	3006.9
		BLM		11885.7			PICH		5358.5	2478.4
		PICH		4452.4			PICH		4492.1	1612
		BLM		11197.4		Background	BLM		11311.7
		PICH		5887			BLM		11424.7	113
		BLM		14072			BLM		11885.7	574
		PICH		5358.5			BLM		11197.4	0
		BLM		11543.3			BLM		14072	2760.3
		PICH		4492.1			BLM		11543.3	231.6
		BLM		11306.8			BLM		11306.8	0
	deltaBLM + GFP-BLM-WT_ICRF_GFP-PICH-CEN-45 early ana.czi
	Background	PICH		2537.7		Background	PICH		2537.7
	Background	BLM		7775.9			PICH		4476.8	1939.1
		PICH		4476.8			PICH		6954.3	4416.6
		BLM		8963.8			PICH		6384	3846.3
		PICH		6954.3			PICH		6496.3	3958.6
		BLM		11213.8			PICH		7216.1	4678.4
		PICH		6384			PICH		7590.6	5052.9
		BLM		10288.9			PICH		6470.4	3932.7
		PICH		6496.3			PICH		6555.9	4018.2
		BLM		10629.7			PICH		5754.1	3216.4
		PICH		7216.1			PICH		5656.6	3118.9
		BLM		10999			PICH		5666	3128.3
		PICH		7590.6		Background	BLM		7775.9
		BLM		10674.1			BLM		8963.8	1187.9
		PICH		6470.4			BLM		11213.8	3437.9
		BLM		9368.1			BLM		10288.9	2513
		PICH		6555.9			BLM		10629.7	2853.8
		BLM		9256.3			BLM		10999	3223.1
		PICH		5754.1			BLM		10674.1	2898.2
		BLM		8630.5			BLM		9368.1	1592.2
		PICH		5656.6			BLM		9256.3	1480.4
		BLM		8238.6			BLM		8630.5	854.6
		PICH		5666			BLM		8238.6	462.7
		BLM		8554.5			BLM		8554.5	778.6
	deltaBLM + GFP-BLM-WT_ICRF_GFP-PICH-CEN-44 early ana.czi
	Background	PICH		3431.1		Background	PICH		3431.1
	Background	BLM		6581.1			PICH		4755.2	1324.1
		PICH		4755.2			PICH		6098.1	2667
		BLM		6851.9			PICH		6530.7	3099.6
		PICH		6098.1			PICH		7037.7	3606.6
		BLM		7282.8			PICH		6271.1	2840
		PICH		6530.7			PICH		5158.1	1727
		BLM		6917.8			PICH		5440.4	2009.3
		PICH		7037.7			PICH		5829.2	2398.1
		BLM		7240			PICH		6126.7	2695.6
		PICH		6271.1			PICH		4368.8	937.7
		BLM		8182.1			PICH		5949.9	2518.8
		PICH		5158.1			PICH		4535.9	1104.8
		BLM		7346.2			PICH		7531.5	4100.4
		PICH		5440.4		Background	BLM		6581.1
		BLM		7271			BLM		6851.9	270.8
		PICH		5829.2			BLM		7282.8	701.7
		BLM		7409.2			BLM		6917.8	336.7
		PICH		6126.7			BLM		7240	658.9
		BLM		7791.3			BLM		8182.1	1601
		PICH		4368.8			BLM		7346.2	765.1
		BLM		7093.8			BLM		7271	689.9
		PICH		5949.9			BLM		7409.2	828.1
		BLM		7554.5			BLM		7791.3	1210.2
		PICH		4535.9			BLM		7093.8	512.7
		BLM		6851.3			BLM		7554.5	973.4
		PICH		7531.5			BLM		6851.3	270.2
		BLM		7422.9			BLM		7422.9	841.8
	deltaBLM + GFP-BLM-WT_ICRF_GFP-PICH-CEN-43 late ana.czi
	Background	PICH		1739.3		Background	PICH		1739.3
	Background	BLM		3393.6			PICH		4394.9	2655.6
		PICH		4394.9			PICH		5225.3	3486
		BLM		3759.9			PICH		5401.2	3661.9
		PICH		5225.3			PICH		4288.4	2549.1
		BLM		3957.2			PICH		4075.6	2336.3
		PICH		5401.2		Background	BLM		3393.6
		BLM		4249.1			BLM		3759.9	366.3
		PICH		4288.4			BLM		3957.2	563.6
		BLM		3952			BLM		4249.1	855.5
		PICH		4075.6			BLM		3952	558.4
		BLM		3713			BLM		3713	319.4
	deltaBLM + GFP-BLM-WT_ICRF_GFP-PICH-CEN-40 mid ana.czi
	Background	PICH		2153.3		Background	PICH		2153.3
	Background	BLM		10690.2			PICH		3551.2	1397.9
		PICH		3551.2			PICH		3898.1	1744.8
		BLM		11893.3			PICH		3308.7	1155.4
		PICH		3898.1		Background	BLM		10690.2
		BLM		12007.1			BLM		11893.3	1203.1
		PICH		3308.7			BLM		12007.1	1316.9
		BLM		12071.9			BLM		12071.9	1381.7
	deltaBLM + GFP-BLM-WT_ICRF_GFP-PICH-CEN-39 late ana.czi
	Background	PICH		2576.9		Background	PICH		2576.9
	Background	BLM		10862.8			PICH		4562.1	1985.2
		PICH		4562.1			PICH		3856	1279.1
		BLM		11843.3		Background	BLM		10862.8
		PICH		3856			BLM		11843.3	980.5
		BLM		11788.5			BLM		11788.5	925.7
	deltaBLM + GFP-BLM-WT_ICRF_GFP-PICH-CEN-35 mid ana.czi
	Background	PICH		3583.7		Background	PICH		3583.7
	Background	BLM		17355.6			PICH		4994.1	1410.4
		PICH		4994.1			PICH		5716.1	2132.4
		BLM		17405.8			PICH		5097.1	1513.4
		PICH		5716.1		Background	BLM		17355.6
		BLM		18709.4			BLM		17405.8	50.2
		PICH		5097.1			BLM		18709.4	1353.8
		BLM		17753.2			BLM		17753.2	397.6
	deltaBLM + GFP-BLM-WT_ICRF_GFP-PICH-CEN-34 mid ana.czi
	Background	PICH		4323.9		Background	PICH		4323.9
	Background	BLM		12471.3			PICH		4847.2	523.3
		PICH		4847.2			PICH		4962.6	638.7
		BLM		13080.6			PICH		5031.4	707.5
		PICH		4962.6			PICH		6149.6	1825.7
		BLM		14237.8			PICH		5303.4	979.5
		PICH		5031.4			PICH		4771.2	447.3
		BLM		14569.9		Background	BLM		12471.3
		PICH		6149.6			BLM		13080.6	609.3
		BLM		15058.6			BLM		14237.8	1766.5
		PICH		5303.4			BLM		14569.9	2098.6
		BLM		13579.5			BLM		15058.6	2587.3
		PICH		4771.2			BLM		13579.5	1108.2
		BLM		12538.2			BLM		12538.2	66.9
	deltaBLM + GFP-BLM-WT_ICRF_GFP-PICH-CEN-32 late ana.czi
	Background	PICH		3442.4		Background	PICH		3442.4
	Background	BLM		12966.8			PICH		4565.8	1123.4
		PICH		4565.8			PICH		5649.4	2207
		BLM		13580.2			PICH		6080.6	2638.2
		PICH		5649.4			PICH		5944.6	2502.2
		BLM		13738.5			PICH		5786.3	2343.9
		PICH		6080.6			PICH		5044.7	1602.3
		BLM		13756.5		Background	BLM		12966.8
		PICH		5944.6			BLM		13580.2	613.4
		BLM		13356.9			BLM		13738.5	771.7
		PICH		5786.3			BLM		13756.5	789.7
		BLM		15346.2			BLM		13356.9	390.1
		PICH		5044.7			BLM		15346.2	2379.4
		BLM		14909			BLM		14909	1942.2
	deltaBLM + GFP-BLM-WT_ICRF_GFP-PICH-CEN-31 mid ana.czi
	Background	PICH		3329.2		Background	PICH		3329.2
	Background	BLM		10523.1			PICH		5573	2243.8
		PICH		5573			PICH		5490.7	2161.5
		BLM		11119.2			PICH		6121.9	2792.7
		PICH		5490.7			PICH		6158	2828.8
		BLM		12287.9			PICH		5550.1	2220.9
		PICH		6121.9			PICH		5660.2	2331
		BLM		12367.4			PICH		6070	2740.8
		PICH		6158			PICH		4972.9	1643.7
		BLM		12824.2			PICH		4832.7	1503.5
		PICH		5550.1			PICH		4844.9	1515.7
		BLM		12911.9		Background	BLM		10523.1
		PICH		5660.2			BLM		11119.2	596.1
		BLM		11089			BLM		12287.9	1764.8
		PICH		6070			BLM		12367.4	1844.3
		BLM		11448.1			BLM		12824.2	2301.1
		PICH		4972.9			BLM		12911.9	2388.8
		BLM		11814.2			BLM		11089	565.9
		PICH		4832.7			BLM		11448.1	925
		BLM		12082.3			BLM		11814.2	1291.1
		PICH		4844.9			BLM		12082.3	1559.2
		BLM		11363.1			BLM		11363.1	840
	deltaBLM + GFP-BLM-WT_ICRF_GFP-PICH-CEN-30 late ana.czi
	Background	PICH		1988.7		Background	PICH		1988.7
	Background	BLM		13049.6			PICH		3203.4	1214.7
		PICH		3203.4			PICH		3100.7	1112
		BLM		13771.4			PICH		4021	2032.3
		PICH		3100.7		Background	BLM		13049.6
		BLM		13249.8			BLM		13771.4	721.8
		PICH		4021			BLM		13249.8	200.2
		BLM		14792.5			BLM		14792.5	1742.9
	deltaBLM + GFP-BLM-WT_ICRF_GFP-PICH-CEN-29 mid ana.czi
	Background	PICH		2678.8		Background	PICH		2678.8
	Background	BLM		6401.4			PICH		5208.3	2529.5
		PICH		5208.3			PICH		4591.8	1913
		BLM		7183.3			PICH		7646.5	4967.7
		PICH		4591.8			PICH		7224.5	4545.7
		BLM		7291.7			PICH		6639.6	3960.8
		PICH		7646.5			PICH		5982.3	3303.5
		BLM		8745.1			PICH		5603.9	2925.1
		PICH		7224.5			PICH		5808.6	3129.8
		BLM		7332			PICH		7384.1	4705.3
		PICH		6639.6			PICH		7167.5	4488.7
		BLM		7817.5			PICH		7846.4	5167.6
		PICH		5982.3			PICH		5851.4	3172.6
		BLM		8316.8			PICH		5693.8	3015
		PICH		5603.9			PICH		5014.4	2335.6
		BLM		8207.6			PICH		5323.2	2644.4
		PICH		5808.6			PICH		6289.8	3611
		BLM		7122		Background	BLM		6401.4
		PICH		7384.1			BLM		7183.3	781.9
		BLM		7444.4			BLM		7291.7	890.3
		PICH		7167.5			BLM		8745.1	2343.7
		BLM		7848.7			BLM		7332	930.6
		PICH		7846.4			BLM		7817.5	1416.1
		BLM		8835.8			BLM		8316.8	1915.4
		PICH		5851.4			BLM		8207.6	1806.2
		BLM		8839.9			BLM		7122	720.6
		PICH		5693.8			BLM		7444.4	1043
		BLM		6760.7			BLM		7848.7	1447.3
		PICH		5014.4			BLM		8835.8	2434.4
		BLM		6506.9			BLM		8839.9	2438.5
		PICH		5323.2			BLM		6760.7	359.3
		BLM		7160.8			BLM		6506.9	105.5
		PICH		6289.8			BLM		7160.8	759.4
		BLM		6701.2			BLM		6701.2	299.8
	deltaBLM + GFP-BLM-WT_ICRF_GFP-PICH-CEN-28 late ana.czi
	Background	PICH		2390.2		Background	PICH		2390.2
	Background	BLM		14882.5			PICH		3865.9	1475.7
		PICH		3865.9			PICH		4212.6	1822.4
		BLM		16917.1		Background	BLM		14882.5
		PICH		4212.6			BLM		16917.1	2034.6
		BLM		17363			BLM		17363	2480.5
	deltaBLM + GFP-BLM-WT_ICRF_GFP-PICH-CEN-26 mid ana.czi
	Background	PICH		2042.1		Background	PICH		2042.1
	Background	BLM		10088.3			PICH		3208.3	1166.2
		PICH		3208.3			PICH		3043.6	1001.5
		BLM		11690.3			PICH		2919.9	877.8
		PICH		3043.6			PICH		3162	1119.9
		BLM		10967.8			PICH		3047.6	1005.5
		PICH		2919.9		Background	BLM		10088.3
		BLM		10645.6			BLM		11690.3	1602
		PICH		3162			BLM		10967.8	879.5
		BLM		10970.9			BLM		10645.6	557.3
		PICH		3047.6			BLM		10970.9	882.6
		BLM		11766.3			BLM		11766.3	1678
	deltaBLM + GFP-BLM-WT_ICRF_GFP-PICH-CEN-16 mid ana.czi
	Background	PICH		2433.1		Background	PICH		2433.1
	Background	BLM		9297.4			PICH		4181.4	1748.3
		PICH		4181.4			PICH		3775.1	1342
		BLM		11324.9			PICH		4250.4	1817.3
		PICH		3775.1			PICH		4523.7	2090.6
		BLM		10733.4			PICH		4107.3	1674.2
		PICH		4250.4			PICH		3297.5	864.4
		BLM		11484		Background	BLM		9297.4
		PICH		4523.7			BLM		11324.9	2027.5
		BLM		13007.5			BLM		10733.4	1436
		PICH		4107.3			BLM		11484	2186.6
		BLM		12318.6			BLM		13007.5	3710.1
		PICH		3297.5			BLM		12318.6	3021.2
		BLM		11115.7			BLM		11115.7	1818.3
	deltaBLM + GFP-BLM-WT_ICRF_GFP-PICH-CEN-15 early ana.czi
	Background	PICH		5581		Background	PICH		5581
	Background	BLM		9627.6			PICH		8680.2	3099.2
		PICH		8680.2			PICH		8947.5	3366.5
		BLM		10473.2			PICH		9254.4	3673.4
		PICH		8947.5			PICH		7761.4	2180.4
		BLM		10345.7			PICH		7937.8	2356.8
		PICH		9254.4		Background	BLM		9627.6
		BLM		10094.5			BLM		10473.2	845.6
		PICH		7761.4			BLM		10345.7	718.1
		BLM		9534.8			BLM		10094.5	466.9
		PICH		7937.8			BLM		9534.8	-92.8
		BLM		10666.5			BLM		10666.5	1038.9
	deltaBLM + GFP-BLM-WT_ICRF_GFP-PICH-CEN-13 early ana.czi
	Background	PICH		4266.8		Background	PICH		4266.8
	Background	BLM		30052.7			PICH		4651	384.2
		PICH		4651			PICH		4721.3	454.5
		BLM		27969.9			PICH		6219.4	1952.6
		PICH		4721.3			PICH		6245.2	1978.4
		BLM		26912.7			PICH		5908.9	1642.1
		PICH		6219.4			PICH		5162.9	896.1
		BLM		32195.2			PICH		4883.6	616.8
		PICH		6245.2		Background	BLM		30052.7
		BLM		31040.5			BLM		27969.9	0
		PICH		5908.9			BLM		26912.7	0
		BLM		30405.4			BLM		32195.2	2142.5
		PICH		5162.9			BLM		31040.5	987.8
		BLM		30512.8			BLM		30405.4	352.7
		PICH		4883.6			BLM		30512.8	460.1
		BLM		26758.2			BLM		26758.2	0
	deltaBLM + GFP-BLM-WT_ICRF_GFP-PICH-CEN-12 late ana.czi
	Background	PICH		2690.5		Background	PICH		2690.5
	Background	BLM		12751.8			PICH		5238.4	2547.9
		PICH		5238.4			PICH		9414.9	6724.4
		BLM		15317.6			PICH		5799.8	3109.3
		PICH		9414.9			PICH		5611.8	2921.3
		BLM		17335.2		Background	BLM		12751.8
		PICH		5799.8			BLM		15317.6	2565.8
		BLM		14121.8			BLM		17335.2	4583.4
		PICH		5611.8			BLM		14121.8	1370
		BLM		14243.2			BLM		14243.2	1491.4
	deltaBLM + GFP-BLM-WT_ICRF_GFP-PICH-CEN-09 mid ana.czi
	Background	PICH		3338.2		Background	PICH		3338.2
	Background	BLM		11391			PICH		3431.1	92.9
		PICH		3431.1			PICH		4674.3	1336.1
		BLM		11277.4			PICH		7479.3	4141.1
		PICH		4674.3			PICH		4517	1178.8
		BLM		12760.8			PICH		4681.7	1343.5
		PICH		7479.3			PICH		5487.8	2149.6
		BLM		13393.5			PICH		4774.8	1436.6
		PICH		4517			PICH		4036.1	697.9
		BLM		12300.6		Background	BLM		11391
		PICH		4681.7			BLM		11277.4	0
		BLM		10780.3			BLM		12760.8	1369.8
		PICH		5487.8			BLM		13393.5	2002.5
		BLM		13760.1			BLM		12300.6	909.6
		PICH		4774.8			BLM		10780.3	-610.7
		BLM		12514.4			BLM		13760.1	2369.1
		PICH		4036.1			BLM		12514.4	1123.4
		BLM		12729.2			BLM		12729.2	1338.2
	deltaBLM + GFP-BLM-WT_ICRF_GFP-PICH-CEN-02 early ana.czi
	Background	PICH		3866.7		Background	PICH		3866.7
	Background	BLM		6074.5			PICH		5108.9	1242.2
		PICH		5108.9			PICH		5841.1	1974.4
		BLM		7197.6			PICH		6119.6	2252.9
		PICH		5841.1			PICH		5998.8	2132.1
		BLM		7382.6			PICH		6101.8	2235.1
		PICH		6119.6			PICH		5960.6	2093.9
		BLM		7034.3			PICH		5500.2	1633.5
		PICH		5998.8			PICH		5903.9	2037.2
		BLM		6636.1			PICH		4881.1	1014.4
		PICH		6101.8			PICH		4095.5	228.8
		BLM		6633		Background	BLM		6074.5
		PICH		5960.6			BLM		7197.6	1123.1
		BLM		7115.4			BLM		7382.6	1308.1
		PICH		5500.2			BLM		7034.3	959.8
		BLM		6907.7			BLM		6636.1	561.6
		PICH		5903.9			BLM		6633	558.5
		BLM		7458.4			BLM		7115.4	1040.9
		PICH		4881.1			BLM		6907.7	833.2
		BLM		6917.7			BLM		7458.4	1383.9
		PICH		4095.5			BLM		6917.7	843.2
		BLM		7014.1			BLM		7014.1	939.6

## Sheet: GFP-delta51 Analysis
	deltaBLM + GFP-BLM-delta51_ICRF_GFP-PICH-CEN-64 early ana.czi			Mean			Background correction									PICH and BLM
	Background	PICH	1	3447.6			PICH	3447.6					if negative zero			PICH	BLM
	Background	BLM	2	5838			PICH	5742.1	2294.5		PICH	2294.5	2294.5			2294.5	729.8
		PICH	3	5742.1			PICH	4696.8	1249.2		PICH	1249.2	1249.2			1249.2	528.8
		BLM	4	6567.8			PICH	5223.8	1776.2		PICH	1776.2	1776.2			1776.2	383.7
		PICH	5	4696.8			PICH	4139.2	691.6		PICH	691.6	691.6			691.6	0
		BLM	6	6366.8			PICH	5438.1	1990.5		PICH	1990.5	1990.5			1990.5	0
		PICH	7	5223.8			PICH	4472.7	1025.1		PICH	1025.1	1025.1			1025.1	0
		BLM	8	6221.7			PICH	6473.9	3026.3		PICH	3026.3	3026.3			3026.3	0
		PICH	9	4139.2			PICH	6621.5	3173.9		PICH	3173.9	3173.9			3173.9	0
		BLM	10	5683.6			BLM	5838			BLM
		PICH	11	5438.1			BLM	6567.8	729.8		BLM	729.8	729.8			0	0
		BLM	12	5550.7			BLM	6366.8	528.8		BLM	528.8	528.8			903.7	0
		PICH	13	4472.7			BLM	6221.7	383.7		BLM	383.7	383.7			441.7	0
		BLM	14	5266.8			BLM	5683.6	-154.4		BLM	-154.4	0			1789.8	168.1
		PICH	15	6473.9			BLM	5550.7	-287.3		BLM	-287.3	0			1381.2	215
		BLM	16	5623.3			BLM	5266.8	-571.2		BLM	-571.2	0			1983.4	223
		PICH	17	6621.5			BLM	5623.3	-214.7		BLM	-214.7	0			802	27.6
		BLM	18	5547.3			BLM	5547.3	-290.7		BLM	-290.7	0			409.4	223.3
																428.3	142.7
	deltaBLM + GFP-BLM-delta51_ICRF_GFP-PICH-CEN-63 metaphase-like.czi															305.6	0
	Background	PICH	1	4405.5			PICH	4405.5			PICH					1242.5	0
	Background	BLM	2	4999.2			PICH	4094.8	-310.7		PICH	-310.7	0			2374.4	0
		PICH	3	4094.8			PICH	5309.2	903.7		PICH	903.7	903.7			2960.6	0
		BLM	4	4665			PICH	4847.2	441.7		PICH	441.7	441.7			1398.8	189.2
		PICH	5	5309.2			PICH	6195.3	1789.8		PICH	1789.8	1789.8
		BLM	6	4959.6			PICH	5786.7	1381.2		PICH	1381.2	1381.2			2126.3	0
		PICH	7	4847.2			PICH	6388.9	1983.4		PICH	1983.4	1983.4			2655.3	79.8
		BLM	8	4894.2			PICH	5207.5	802		PICH	802	802			1296.7	0
		PICH	9	6195.3			PICH	4814.9	409.4		PICH	409.4	409.4			3426	460.7
		BLM	10	5167.3			PICH	4833.8	428.3		PICH	428.3	428.3			1384.8	65.6
		PICH	11	5786.7			PICH	4711.1	305.6		PICH	305.6	305.6			0	0
		BLM	12	5214.2			PICH	5648	1242.5		PICH	1242.5	1242.5			3179.8	293.5
		PICH	13	6388.9			PICH	6779.9	2374.4		PICH	2374.4	2374.4			4413.9	79.9
		BLM	14	5222.2			PICH	7366.1	2960.6		PICH	2960.6	2960.6			2593.4	0
		PICH	15	5207.5			PICH	5804.3	1398.8		PICH	1398.8	1398.8			2210.2	0
		BLM	16	5026.8			BLM	4999.2			BLM					1513.7	0
		PICH	17	4814.9			BLM	4665	-334.2		BLM	-334.2	0
		BLM	18	5222.5			BLM	4959.6	-39.6		BLM	-39.6	0			2646	246.1
		PICH	19	4833.8			BLM	4894.2	-105		BLM	-105	0			1440.9	0
		BLM	20	5141.9			BLM	5167.3	168.1		BLM	168.1	168.1			1270.9	0
		PICH	21	4711.1			BLM	5214.2	215		BLM	215	215			3030.9	271
		BLM	22	4875.5			BLM	5222.2	223		BLM	223	223			3940.5	524.2
		PICH	23	5648			BLM	5026.8	27.6		BLM	27.6	27.6			2708.4	1012.7
		BLM	24	4433			BLM	5222.5	223.3		BLM	223.3	223.3			2817.2	244.1
		PICH	25	6779.9			BLM	5141.9	142.7		BLM	142.7	142.7			1541.9	0
		BLM	26	4771			BLM	4875.5	-123.7		BLM	-123.7	0			3068.4	129.1
		PICH	27	7366.1			BLM	4433	-566.2		BLM	-566.2	0			1694.9	157
		BLM	28	4820.1			BLM	4771	-228.2		BLM	-228.2	0
		PICH	29	5804.3			BLM	4820.1	-179.1		BLM	-179.1	0			1721.6	0
		BLM	30	5188.4			BLM	5188.4	189.2		BLM	189.2	189.2			2084.1	0
																2084.9	0
	deltaBLM + GFP-BLM-delta51_ICRF_GFP-PICH-CEN-62 early ana.czi															4441.8	0
	Background	PICH	1	2959.5			PICH	2959.5			PICH					3971.1	209.3
	Background	BLM	2	5105			PICH	5085.8	2126.3		PICH	2126.3	2126.3			3064.8	28.1
		PICH	3	5085.8			PICH	5614.8	2655.3		PICH	2655.3	2655.3			1733.1	63.9
		BLM	4	4793.5			PICH	4256.2	1296.7		PICH	1296.7	1296.7			1282.4	0
		PICH	5	5614.8			PICH	6385.5	3426		PICH	3426	3426			1169.8	0
		BLM	6	5184.8			PICH	4344.3	1384.8		PICH	1384.8	1384.8			3680.6	450.3
		PICH	7	4256.2			PICH	2566.7	-392.8		PICH	-392.8	0			1811.3	0
		BLM	8	5088.5			PICH	6139.3	3179.8		PICH	3179.8	3179.8
		PICH	9	6385.5			PICH	7373.4	4413.9		PICH	4413.9	4413.9			2505	0
		BLM	10	5565.7			PICH	5552.9	2593.4		PICH	2593.4	2593.4			5169	0
		PICH	11	4344.3			PICH	5169.7	2210.2		PICH	2210.2	2210.2			5953.8	166.7
		BLM	12	5170.6			PICH	4473.2	1513.7		PICH	1513.7	1513.7			3092.8	0
		PICH	13	2566.7			BLM	5105			BLM					3903.5	0
		BLM	14	4733.7			BLM	4793.5	-311.5		BLM	-311.5	0			3270.8	0
		PICH	15	6139.3			BLM	5184.8	79.8		BLM	79.8	79.8			1972.8	273.8
		BLM	16	5398.5			BLM	5088.5	-16.5		BLM	-16.5	0			2810.2	141.1
		PICH	17	7373.4			BLM	5565.7	460.7		BLM	460.7	460.7			2887.6	0
		BLM	18	5184.9			BLM	5170.6	65.6		BLM	65.6	65.6			1595.2	0
		PICH	19	5552.9			BLM	4733.7	-371.3		BLM	-371.3	0			4189.2	101.1
		BLM	20	4918.3			BLM	5398.5	293.5		BLM	293.5	293.5
		PICH	21	5169.7			BLM	5184.9	79.9		BLM	79.9	79.9			5421	941.8
		BLM	22	4643.9			BLM	4918.3	-186.7		BLM	-186.7	0			4758.2	744
		PICH	23	4473.2			BLM	4643.9	-461.1		BLM	-461.1	0			2109.8	477.4
		BLM	24	4327.7			BLM	4327.7	-777.3		BLM	-777.3	0			8014.1	974
																2826.1	198.7
	deltaBLM + GFP-BLM-delta51_ICRF_GFP-PICH-CEN-61 early ana.czi															3751	203.8
	Background	PICH	1	3405.1			PICH	3405.1			PICH					1422.5	254.8
	Background	BLM	2	8644.7			PICH	6051.1	2646		PICH	2646	2646
		PICH	3	6051.1			PICH	4846	1440.9		PICH	1440.9	1440.9			843.6	0
		BLM	4	8890.8			PICH	4676	1270.9		PICH	1270.9	1270.9			1590.5	0
		PICH	5	4846			PICH	6436	3030.9		PICH	3030.9	3030.9			2229	0
		BLM	6	7740.1			PICH	7345.6	3940.5		PICH	3940.5	3940.5			1041.4	0
		PICH	7	4676			PICH	6113.5	2708.4		PICH	2708.4	2708.4			1263.8	117.7
		BLM	8	8124.2			PICH	6222.3	2817.2		PICH	2817.2	2817.2			2047.9	0
		PICH	9	6436			PICH	4947	1541.9		PICH	1541.9	1541.9			1811	0
		BLM	10	8915.7			PICH	6473.5	3068.4		PICH	3068.4	3068.4			584.5	82.1
		PICH	11	7345.6			PICH	5100	1694.9		PICH	1694.9	1694.9
		BLM	12	9168.9			BLM	8644.7			BLM					2000.8	0
		PICH	13	6113.5			BLM	8890.8	246.1		BLM	246.1	246.1			2154.4	633.2
		BLM	14	9657.4			BLM	7740.1	-904.6		BLM	-904.6	0			1535.9	0
		PICH	15	6222.3			BLM	8124.2	-520.5		BLM	-520.5	0			2197.6	309.3
		BLM	16	8888.8			BLM	8915.7	271		BLM	271	271			1310	0
		PICH	17	4947			BLM	9168.9	524.2		BLM	524.2	524.2			987.4	0
		BLM	18	8614.9			BLM	9657.4	1012.7		BLM	1012.7	1012.7			589.8	0
		PICH	19	6473.5			BLM	8888.8	244.1		BLM	244.1	244.1
		BLM	20	8773.8			BLM	8614.9	-29.8		BLM	-29.8	0			1268.6	0
		PICH	21	5100			BLM	8773.8	129.1		BLM	129.1	129.1			1723.4	0
		BLM	22	8801.7			BLM	8801.7	157		BLM	157	157			1652.7	47.5
																2789.2	270.4
	deltaBLM + GFP-BLM-delta51_ICRF_GFP-PICH-CEN-60 ana-like.czi															3542	72.3
	Background	PICH	1	2642.4			PICH	2642.4			PICH					4563.3	241.8
	Background	BLM	2	5563.1			PICH	4364	1721.6		PICH	1721.6	1721.6			1954.6	0
		PICH	3	4364			PICH	4726.5	2084.1		PICH	2084.1	2084.1			796	0
		BLM	4	5052.1			PICH	4727.3	2084.9		PICH	2084.9	2084.9			4205.8	57.6
		PICH	5	4726.5			PICH	7084.2	4441.8		PICH	4441.8	4441.8			2855.6	135.2
		BLM	6	5441.9			PICH	6613.5	3971.1		PICH	3971.1	3971.1
		PICH	7	4727.3			PICH	5707.2	3064.8		PICH	3064.8	3064.8			1341.3	0
		BLM	8	5478			PICH	4375.5	1733.1		PICH	1733.1	1733.1			2454.1	0
		PICH	9	7084.2			PICH	3924.8	1282.4		PICH	1282.4	1282.4			1372.4	0
		BLM	10	5527.3			PICH	3812.2	1169.8		PICH	1169.8	1169.8			1650.4	39.4
		PICH	11	6613.5			PICH	6323	3680.6		PICH	3680.6	3680.6			1571.4	27.6
		BLM	12	5772.4			PICH	4453.7	1811.3		PICH	1811.3	1811.3			2142.3	399.7
		PICH	13	5707.2			BLM	5563.1			BLM					2806.6	0
		BLM	14	5591.2			BLM	5052.1	-511		BLM	-511	0			2583.2	0
		PICH	15	4375.5			BLM	5441.9	-121.2		BLM	-121.2	0			2151.9	0
		BLM	16	5627			BLM	5478	-85.1		BLM	-85.1	0			2404.9	233.2
		PICH	17	3924.8			BLM	5527.3	-35.8		BLM	-35.8	0
		BLM	18	5413.2			BLM	5772.4	209.3		BLM	209.3	209.3			1624	0
		PICH	19	3812.2			BLM	5591.2	28.1		BLM	28.1	28.1			2811.3	0
		BLM	20	5298.2			BLM	5627	63.9		BLM	63.9	63.9			4826.8	536.4
		PICH	21	6323			BLM	5413.2	-149.9		BLM	-149.9	0			4991.2	212.6
		BLM	22	6013.4			BLM	5298.2	-264.9		BLM	-264.9	0			2793	675.2
		PICH	23	4453.7			BLM	6013.4	450.3		BLM	450.3	450.3			2819.1	0
		BLM	24	4937.9			BLM	4937.9	-625.2		BLM	-625.2	0			1194.2	0
																3415.1	170.4
	deltaBLM + GFP-BLM-delta51_ICRF_GFP-PICH-CEN-58 metaphase-like.czi															3874.8	0.8
	Background	PICH	1	2816.5			PICH	2816.5			PICH
	Background	BLM	2	5693.1			PICH	5321.5	2505		PICH	2505	2505			5012.4	0
		PICH	3	5321.5			PICH	7985.5	5169		PICH	5169	5169			2843.8	0
		BLM	4	5293.5			PICH	8770.3	5953.8		PICH	5953.8	5953.8			2182.8	0
		PICH	5	7985.5			PICH	5909.3	3092.8		PICH	3092.8	3092.8			2636.1	0
		BLM	6	5573.2			PICH	6720	3903.5		PICH	3903.5	3903.5			4174.5	0
		PICH	7	8770.3			PICH	6087.3	3270.8		PICH	3270.8	3270.8			4056.2	91.9
		BLM	8	5859.8			PICH	4789.3	1972.8		PICH	1972.8	1972.8			1446.8	305.2
		PICH	9	5909.3			PICH	5626.7	2810.2		PICH	2810.2	2810.2			3585.7	0
		BLM	10	5602.5			PICH	5704.1	2887.6		PICH	2887.6	2887.6			1038.6	0
		PICH	11	6720			PICH	4411.7	1595.2		PICH	1595.2	1595.2			5447.9	0
		BLM	12	5681.7			PICH	7005.7	4189.2		PICH	4189.2	4189.2
		PICH	13	6087.3			BLM	5693.1			BLM					1966.8	0
		BLM	14	5289.9			BLM	5293.5	-399.6		BLM	-399.6	0			1612.6	0
		PICH	15	4789.3			BLM	5573.2	-119.9		BLM	-119.9	0			2562.8	239.6
		BLM	16	5966.9			BLM	5859.8	166.7		BLM	166.7	166.7			1428.9	26.3
		PICH	17	5626.7			BLM	5602.5	-90.6		BLM	-90.6	0			3316	0
		BLM	18	5834.2			BLM	5681.7	-11.4		BLM	-11.4	0			1617	0
		PICH	19	5704.1			BLM	5289.9	-403.2		BLM	-403.2	0			2366	0
		BLM	20	4917.4			BLM	5966.9	273.8		BLM	273.8	273.8
		PICH	21	4411.7			BLM	5834.2	141.1		BLM	141.1	141.1			1078.9	0
		BLM	22	5499.1			BLM	4917.4	-775.7		BLM	-775.7	0			4164.7	361.2
		PICH	23	7005.7			BLM	5499.1	-194		BLM	-194	0			3075.5	423
		BLM	24	5794.2			BLM	5794.2	101.1		BLM	101.1	101.1			3974.7	0
																2368.2	0
	deltaBLM + GFP-BLM-delta51_ICRF_GFP-PICH-CEN-56 early ana.czi															862.7	0
	Background	PICH	1	3995			PICH	3995			PICH					1624.3	33.9
	Background	BLM	2	4222.6			PICH	9416	5421		PICH	5421	5421			3551.8	0
		PICH	3	9416			PICH	8753.2	4758.2		PICH	4758.2	4758.2			4744.8	656.3
		BLM	4	5164.4			PICH	6104.8	2109.8		PICH	2109.8	2109.8
		PICH	5	8753.2			PICH	12009.1	8014.1		PICH	8014.1	8014.1			2861.1	125.4
		BLM	6	4966.6			PICH	6821.1	2826.1		PICH	2826.1	2826.1			5350.3	431.9
		PICH	7	6104.8			PICH	7746	3751		PICH	3751	3751			5019.7	535.6
		BLM	8	4700			PICH	5417.5	1422.5		PICH	1422.5	1422.5			5499.1	275.6
		PICH	9	12009.1			BLM	4222.6			BLM					5435.9	233.7
		BLM	10	5196.6			BLM	5164.4	941.8		BLM	941.8	941.8			2485.7	0
		PICH	11	6821.1			BLM	4966.6	744		BLM	744	744			2532.3	0
		BLM	12	4421.3			BLM	4700	477.4		BLM	477.4	477.4			5704.7	631.3
		PICH	13	7746			BLM	5196.6	974		BLM	974	974
		BLM	14	4426.4			BLM	4421.3	198.7		BLM	198.7	198.7			343	0
		PICH	15	5417.5			BLM	4426.4	203.8		BLM	203.8	203.8			1419.8	0
		BLM	16	4477.4			BLM	4477.4	254.8		BLM	254.8	254.8			1011.2	290.3
																1640.8	30.9
	deltaBLM + GFP-BLM-delta51_ICRF_GFP-PICH-CEN-51 early ana.czi															1330.6	29.8
	Background	PICH	1	2816.5			PICH	2816.5			PICH					1011.3	351.1
	Background	BLM	2	5692.7			PICH	3660.1	843.6		PICH	843.6	843.6			615.7	208.4
		PICH	3	3660.1			PICH	4407	1590.5		PICH	1590.5	1590.5			1310.5	36.7
		BLM	4	5123.8			PICH	5045.5	2229		PICH	2229	2229			1249.2	391.3
		PICH	5	4407			PICH	3857.9	1041.4		PICH	1041.4	1041.4				0
		BLM	6	5296.8			PICH	4080.3	1263.8		PICH	1263.8	1263.8			5553.3	561.7
		PICH	7	5045.5			PICH	4864.4	2047.9		PICH	2047.9	2047.9			3500.6	101.7
		BLM	8	5441.4			PICH	4627.5	1811		PICH	1811	1811			4064.2	626.2
		PICH	9	3857.9			PICH	3401	584.5		PICH	584.5	584.5			3535.7	633.7
		BLM	10	5601.9			BLM	5692.7			BLM					2214.8	1032
		PICH	11	4080.3			BLM	5123.8	-568.9		BLM	-568.9	0			3790.9	1040.3
		BLM	12	5810.4			BLM	5296.8	-395.9		BLM	-395.9	0			3448.1	698.3
		PICH	13	4864.4			BLM	5441.4	-251.3		BLM	-251.3	0
		BLM	14	5351.7			BLM	5601.9	-90.8		BLM	-90.8	0			564.8	0
		PICH	15	4627.5			BLM	5810.4	117.7		BLM	117.7	117.7			1047.7	324.5
		BLM	16	5446.3			BLM	5351.7	-341		BLM	-341	0			1645.7	0
		PICH	17	3401			BLM	5446.3	-246.4		BLM	-246.4	0			3606.3	0
		BLM	18	5774.8			BLM	5774.8	82.1		BLM	82.1	82.1			3695.5	0
	deltaBLM + GFP-BLM-delta51_ICRF_GFP-PICH-CEN-50 ana-like.czi
	Background	PICH	1	2532.5			PICH	2532.5			PICH					1527	0
	Background	BLM	2	6921.7			PICH	4533.3	2000.8		PICH	2000.8	2000.8			1722	0
		PICH	3	4533.3			PICH	4686.9	2154.4		PICH	2154.4	2154.4			1915.1	0
		BLM	4	6793.1			PICH	4068.4	1535.9		PICH	1535.9	1535.9			4187.2	0
		PICH	5	4686.9			PICH	4730.1	2197.6		PICH	2197.6	2197.6			1904.1	0
		BLM	6	7554.9			PICH	3842.5	1310		PICH	1310	1310			5648.1	0
		PICH	7	4068.4			PICH	3519.9	987.4		PICH	987.4	987.4
		BLM	8	6916.7			PICH	3122.3	589.8		PICH	589.8	589.8			954.2	1.7
		PICH	9	4730.1			BLM	6921.7			BLM					2771.9	329.1
		BLM	10	7231			BLM	6793.1	-128.6		BLM	-128.6	0			3873.4	722
		PICH	11	3842.5			BLM	7554.9	633.2		BLM	633.2	633.2			4546.5	192.5
		BLM	12	6575.2			BLM	6916.7	-5		BLM	-5	0			4743.2	680.8
		PICH	13	3519.9			BLM	7231	309.3		BLM	309.3	309.3			4475.6	451.6
		BLM	14	6398.7			BLM	6575.2	-346.5		BLM	-346.5	0			4208.5	933.2
		PICH	15	3122.3			BLM	6398.7	-523		BLM	-523	0			5914	1264.3
		BLM	16	6047.8			BLM	6047.8	-873.9		BLM	-873.9	0			4264.7	292.2
																2786	800.3
	deltaBLM + GFP-BLM-delta51_ICRF_GFP-PICH-CEN-49 metaphase-like.czi
	Background	PICH	1	3314.2			PICH	3314.2			PICH					1778.9	1702.3
	Background	BLM	2	3690.3			PICH	4582.8	1268.6		PICH	1268.6	1268.6			1931.7	1710.4
		PICH	3	4582.8			PICH	5037.6	1723.4		PICH	1723.4	1723.4			3182.1	1991.6
		BLM	4	3417.1			PICH	4966.9	1652.7		PICH	1652.7	1652.7			2739.7	1903.4
		PICH	5	5037.6			PICH	6103.4	2789.2		PICH	2789.2	2789.2			2977.5	1920.9
		BLM	6	3356.8			PICH	6856.2	3542		PICH	3542	3542			3927.8	2045.1
		PICH	7	4966.9			PICH	7877.5	4563.3		PICH	4563.3	4563.3			2467.2	1157.6
		BLM	8	3737.8			PICH	5268.8	1954.6		PICH	1954.6	1954.6			2244.6	1131.7
		PICH	9	6103.4			PICH	4110.2	796		PICH	796	796			2753.3	1494.9
		BLM	10	3960.7			PICH	7520	4205.8		PICH	4205.8	4205.8
		PICH	11	6856.2			PICH	6169.8	2855.6		PICH	2855.6	2855.6			980.3	0
		BLM	12	3762.6			BLM	3690.3			BLM					2526.7	0
		PICH	13	7877.5			BLM	3417.1	-273.2		BLM	-273.2	0			3275.2	362.9
		BLM	14	3932.1			BLM	3356.8	-333.5		BLM	-333.5	0			2000.9	589.3
		PICH	15	5268.8			BLM	3737.8	47.5		BLM	47.5	47.5			562.4	0
		BLM	16	3533.5			BLM	3960.7	270.4		BLM	270.4	270.4			1856.7	0
		PICH	17	4110.2			BLM	3762.6	72.3		BLM	72.3	72.3			1152	0
		BLM	18	3608.6			BLM	3932.1	241.8		BLM	241.8	241.8			874.3	0
		PICH	19	7520			BLM	3533.5	-156.8		BLM	-156.8	0			868.5	0
		BLM	20	3747.9			BLM	3608.6	-81.7		BLM	-81.7	0
		PICH	21	6169.8			BLM	3747.9	57.6		BLM	57.6	57.6			2448.2	0
		BLM	22	3825.5			BLM	3825.5	135.2		BLM	135.2	135.2			4966.8	677
																1068.2	0
	deltaBLM + GFP-BLM-delta51_ICRF_GFP-PICH-CEN-48 metaphase-like.czi															3159.9	271.5
	Background	PICH	1	2582.9			PICH	2582.9			PICH					3715.2	0
	Background	BLM	2	4786.2			PICH	3924.2	1341.3		PICH	1341.3	1341.3			623.5	57.6
		PICH	3	3924.2			PICH	5037	2454.1		PICH	2454.1	2454.1			7226.2	510.7
		BLM	4	4695.6			PICH	3955.3	1372.4		PICH	1372.4	1372.4
		PICH	5	5037			PICH	4233.3	1650.4		PICH	1650.4	1650.4			4752.5	524.6
		BLM	6	4493.6			PICH	4154.3	1571.4		PICH	1571.4	1571.4			4057.2	601.7
		PICH	7	3955.3			PICH	4725.2	2142.3		PICH	2142.3	2142.3			1867.2	34.4
		BLM	8	4357			PICH	5389.5	2806.6		PICH	2806.6	2806.6			2503.4	0
		PICH	9	4233.3			PICH	5166.1	2583.2		PICH	2583.2	2583.2			1846.5	274.6
		BLM	10	4825.6			PICH	4734.8	2151.9		PICH	2151.9	2151.9			6241.7	760.2
		PICH	11	4154.3			PICH	4987.8	2404.9		PICH	2404.9	2404.9			3277.2	0
		BLM	12	4813.8			BLM	4786.2			BLM					783	751.3
		PICH	13	4725.2			BLM	4695.6	-90.6		BLM	-90.6	0
		BLM	14	5185.9			BLM	4493.6	-292.6		BLM	-292.6	0			3840.9	204.6
		PICH	15	5389.5			BLM	4357	-429.2		BLM	-429.2	0			5922.5	665.7
		BLM	16	4759			BLM	4825.6	39.4		BLM	39.4	39.4			2930.4	0
		PICH	17	5166.1			BLM	4813.8	27.6		BLM	27.6	27.6			2375.4	0
		BLM	18	4473.9			BLM	5185.9	399.7		BLM	399.7	399.7			1516.7	0
		PICH	19	4734.8			BLM	4759	-27.2		BLM	-27.2	0
		BLM	20	4469.6			BLM	4473.9	-312.3		BLM	-312.3	0			2880.1	142.3
		PICH	21	4987.8			BLM	4469.6	-316.6		BLM	-316.6	0			3396.6	0
		BLM	22	5019.4			BLM	5019.4	233.2		BLM	233.2	233.2			2260.3	34.8
																3433.2	173.5
	deltaBLM + GFP-BLM-delta51_ICRF_GFP-PICH-CEN-45 early ana.czi															3206.8	111.2
	Background	PICH	1	3749.2			PICH	3749.2			PICH
	Background	BLM	2	5427.9			PICH	5373.2	1624		PICH	1624	1624			3159.7	308.9
		PICH	3	5373.2			PICH	6560.5	2811.3		PICH	2811.3	2811.3			3858	445.8
		BLM	4	5304.2			PICH	8576	4826.8		PICH	4826.8	4826.8			2157.1	569.7
		PICH	5	6560.5			PICH	8740.4	4991.2		PICH	4991.2	4991.2			3635.4	1055.8
		BLM	6	4839.5			PICH	6542.2	2793		PICH	2793	2793			8954.3	1085.6
		PICH	7	8576			PICH	6568.3	2819.1		PICH	2819.1	2819.1			4360	998.3
		BLM	8	5964.3			PICH	4943.4	1194.2		PICH	1194.2	1194.2			4051	849
		PICH	9	8740.4			PICH	7164.3	3415.1		PICH	3415.1	3415.1			7554.7	1276.3
		BLM	10	5640.5			PICH	7624	3874.8		PICH	3874.8	3874.8			5367.2	753
		PICH	11	6542.2			BLM	5427.9			BLM					3842.1	304
		BLM	12	6103.1			BLM	5304.2	-123.7		BLM	-123.7	0			3725.5	381.7
		PICH	13	6568.3			BLM	4839.5	-588.4		BLM	-588.4	0			2999	375.5
		BLM	14	5022.2			BLM	5964.3	536.4		BLM	536.4	536.4
		PICH	15	4943.4			BLM	5640.5	212.6		BLM	212.6	212.6			2603	4.9
		BLM	16	5285.7			BLM	6103.1	675.2		BLM	675.2	675.2			1484.3	0
		PICH	17	7164.3			BLM	5022.2	-405.7		BLM	-405.7	0			1220.5	85.7
		BLM	18	5598.3			BLM	5285.7	-142.2		BLM	-142.2	0			1492.8	0
		PICH	19	7624			BLM	5598.3	170.4		BLM	170.4	170.4			1823.3	0
		BLM	20	5428.7			BLM	5428.7	0.8		BLM	0.8	0.8			1796.5	309.2
																817.8	0
	deltaBLM + GFP-BLM-delta51_ICRF_GFP-PICH-CEN-44 ana-like.czi															1624.2	0
	Background	PICH	1	3379.7			PICH	3379.7			PICH
	Background	BLM	2	4546.6			PICH	8392.1	5012.4		PICH	5012.4	5012.4			5135.2	80.1
		PICH	3	8392.1			PICH	6223.5	2843.8		PICH	2843.8	2843.8			1599.6	0
		BLM	4	3937.3			PICH	5562.5	2182.8		PICH	2182.8	2182.8			5395.6	338.4
		PICH	5	6223.5			PICH	6015.8	2636.1		PICH	2636.1	2636.1			3883	334.9
		BLM	6	3843.4			PICH	7554.2	4174.5		PICH	4174.5	4174.5			5411.6	152.3
		PICH	7	5562.5			PICH	7435.9	4056.2		PICH	4056.2	4056.2			3483.2	86.5
		BLM	8	4189.6			PICH	4826.5	1446.8		PICH	1446.8	1446.8			4479.7	336.4
		PICH	9	6015.8			PICH	6965.4	3585.7		PICH	3585.7	3585.7			4672.2	327.7
		BLM	10	4264.6			PICH	4418.3	1038.6		PICH	1038.6	1038.6			4672.6	276.9
		PICH	11	7554.2			PICH	8827.6	5447.9		PICH	5447.9	5447.9			5450.1	489.1
		BLM	12	4385.5			BLM	4546.6			BLM		0			3652.1	154.3
		PICH	13	7435.9			BLM	3937.3	-609.3		BLM	-609.3	0			2413.5	84.3
		BLM	14	4638.5			BLM	3843.4	-703.2		BLM	-703.2	0
		PICH	15	4826.5			BLM	4189.6	-357		BLM	-357	0			272.4	0
		BLM	16	4851.8			BLM	4264.6	-282		BLM	-282	0			1664.5	0
		PICH	17	6965.4			BLM	4385.5	-161.1		BLM	-161.1	0			1821.7	114.9
		BLM	18	4486.6			BLM	4638.5	91.9		BLM	91.9	91.9			1453.4	0
		PICH	19	4418.3			BLM	4851.8	305.2		BLM	305.2	305.2			1403.9	70.2
		BLM	20	4339.7			BLM	4486.6	-60		BLM	-60	0			1809.2	0
		PICH	21	8827.6			BLM	4339.7	-206.9		BLM	-206.9	0			2097.4	0
		BLM	22	4075.3			BLM	4075.3	-471.3		BLM	-471.3	0
																4136	491.5
	deltaBLM + GFP-BLM-delta51_ICRF_GFP-PICH-CEN-43 mid ana.czi															944	0
	Background	PICH	1	4362			PICH	4362			PICH					1313.8	195.6
	Background	BLM	2	6343.3			PICH	6328.8	1966.8		PICH	1966.8	1966.8			2675.1	0
		PICH	3	6328.8			PICH	5974.6	1612.6		PICH	1612.6	1612.6			2433.1	0
		BLM	4	5972.3			PICH	6924.8	2562.8		PICH	2562.8	2562.8			1914.2	100.3
		PICH	5	5974.6			PICH	5790.9	1428.9		PICH	1428.9	1428.9			2571.3	0
		BLM	6	6296			PICH	7678	3316		PICH	3316	3316
		PICH	7	6924.8			PICH	5979	1617		PICH	1617	1617			2382.6	336
		BLM	8	6582.9			PICH	6728	2366		PICH	2366	2366			5305.7	138.2
		PICH	9	5790.9			BLM	6343.3			BLM					5430.1	185.5
		BLM	10	6369.6			BLM	5972.3	-371		BLM	-371	0			3658.7	183
		PICH	11	7678			BLM	6296	-47.3		BLM	-47.3	0			4838.4	403.8
		BLM	12	5866.3			BLM	6582.9	239.6		BLM	239.6	239.6			2532.4	358.1
		PICH	13	5979			BLM	6369.6	26.3		BLM	26.3	26.3			3299.2	148.8
		BLM	14	5093.4			BLM	5866.3	-477		BLM	-477	0			3709.5	0
		PICH	15	6728			BLM	5093.4	-1249.9		BLM	-1249.9	0			2431.8	0
		BLM	16	5082.3			BLM	5082.3	-1261		BLM	-1261	0			4267.1	0
																3606	73.6
	deltaBLM + GFP-BLM-delta51_ICRF_GFP-PICH-CEN-42 mid ana.czi															1895.3	76.3
	Background	PICH	1	3648.2			PICH	3648.2			PICH
	Background	BLM	2	4984.4			PICH	4727.1	1078.9		PICH	1078.9	1078.9			1896.7	185.4
		PICH	3	4727.1			PICH	7812.9	4164.7		PICH	4164.7	4164.7			2177	197.6
		BLM	4	4479.2			PICH	6723.7	3075.5		PICH	3075.5	3075.5			2421.2	150.4
		PICH	5	7812.9			PICH	7622.9	3974.7		PICH	3974.7	3974.7			2154.7	62.2
		BLM	6	5345.6			PICH	6016.4	2368.2		PICH	2368.2	2368.2			3298	189.3
		PICH	7	6723.7			PICH	4510.9	862.7		PICH	862.7	862.7			1993.1	0
		BLM	8	5407.4			PICH	5272.5	1624.3		PICH	1624.3	1624.3			1922.7	524.7
		PICH	9	7622.9			PICH	7200	3551.8		PICH	3551.8	3551.8			1982.9	492.4
		BLM	10	4959			PICH	8393	4744.8		PICH	4744.8	4744.8				0
		PICH	11	6016.4			BLM	4984.4			BLM					2523.8	0
		BLM	12	4589.9			BLM	4479.2	-505.2		BLM	-505.2	0			1534.1	0
		PICH	13	4510.9			BLM	5345.6	361.2		BLM	361.2	361.2			3025.2	4.9
		BLM	14	4724.5			BLM	5407.4	423		BLM	423	423			1882.2	0
		PICH	15	5272.5			BLM	4959	-25.4		BLM	-25.4	0			2455.3	0
		BLM	16	5018.3			BLM	4589.9	-394.5		BLM	-394.5	0			1427.3	0
		PICH	17	7200			BLM	4724.5	-259.9		BLM	-259.9	0			1336	0
		BLM	18	4861.2			BLM	5018.3	33.9		BLM	33.9	33.9
		PICH	19	8393			BLM	4861.2	-123.2		BLM	-123.2	0			2200	0
		BLM	20	5640.7			BLM	5640.7	656.3		BLM	656.3	656.3			3402.7	106.4
																2787.4	0
	deltaBLM + GFP-BLM-delta51_ICRF_GFP-PICH-CEN-41 early ana.czi															2572.8	0
	Background	PICH	1	6658			PICH	6658			PICH					2873.1	171.1
	Background	BLM	2	4709			PICH	9519.1	2861.1		PICH	2861.1	2861.1			2279.4	442.9
		PICH	3	9519.1			PICH	12008.3	5350.3		PICH	5350.3	5350.3			1476.7	317.2
		BLM	4	4834.4			PICH	11677.7	5019.7		PICH	5019.7	5019.7			2485.4	406.2
		PICH	5	12008.3			PICH	12157.1	5499.1		PICH	5499.1	5499.1
		BLM	6	5140.9			PICH	12093.9	5435.9		PICH	5435.9	5435.9			1092.8	115.7
		PICH	7	11677.7			PICH	9143.7	2485.7		PICH	2485.7	2485.7			1416	88.7
		BLM	8	5244.6			PICH	9190.3	2532.3		PICH	2532.3	2532.3			1422.9	199.5
		PICH	9	12157.1			PICH	12362.7	5704.7		PICH	5704.7	5704.7			1351.9	145
		BLM	10	4984.6			BLM	4709			BLM					4013.3	260.5
		PICH	11	12093.9			BLM	4834.4	125.4		BLM	125.4	125.4			2550.3	224.8
		BLM	12	4942.7			BLM	5140.9	431.9		BLM	431.9	431.9			2604.2	108.2
		PICH	13	9143.7			BLM	5244.6	535.6		BLM	535.6	535.6			756.6	26.3
		BLM	14	4541.8			BLM	4984.6	275.6		BLM	275.6	275.6			1760.7	181.6
		PICH	15	9190.3			BLM	4942.7	233.7		BLM	233.7	233.7
		BLM	16	4561.8			BLM	4541.8	-167.2		BLM	-167.2	0			3192.6	148.9
		PICH	17	12362.7			BLM	4561.8	-147.2		BLM	-147.2	0			4639.6	106.9
		BLM	18	5340.3			BLM	5340.3	631.3		BLM	631.3	631.3			5780.2	691.3
																4720.9	239.9
	deltaBLM + GFP-BLM-delta51_ICRF_GFP-PICH-CEN-40 metaphase-like.czi															5454.7	0
	Background	PICH	1	1914.2			PICH	1914.2			PICH					6155	186.6
	Background	BLM	2	2630.5			PICH	2257.2	343		PICH	343	343			6803.9	382.5
		PICH	3	2257.2			PICH	3334	1419.8		PICH	1419.8	1419.8			8372.4	70.9
		BLM	4	2561.2			PICH	2925.4	1011.2		PICH	1011.2	1011.2			3830.6	0
		PICH	5	3334			PICH	3555	1640.8		PICH	1640.8	1640.8			3360.9	0
		BLM	6	2610.1			PICH	3244.8	1330.6		PICH	1330.6	1330.6			5364.8	0
		PICH	7	2925.4			PICH	2925.5	1011.3		PICH	1011.3	1011.3			3385.3	211.1
		BLM	8	2920.8			PICH	2529.9	615.7		PICH	615.7	615.7
		PICH	9	3555			PICH	3224.7	1310.5		PICH	1310.5	1310.5			4863.3	756.6
		BLM	10	2661.4			PICH	3163.4	1249.2		PICH	1249.2	1249.2			5704.7	921.1
		PICH	11	3244.8			BLM	2630.5			BLM					5626	625.7
		BLM	12	2660.3			BLM	2561.2	-69.3		BLM	-69.3	0			5424.4	375.3
		PICH	13	2925.5			BLM	2610.1	-20.4		BLM	-20.4	0			5116.1	620.2
		BLM	14	2981.6			BLM	2920.8	290.3		BLM	290.3	290.3			4923.6	479
		PICH	15	2529.9			BLM	2661.4	30.9		BLM	30.9	30.9			6555.7	975.2
		BLM	16	2838.9			BLM	2660.3	29.8		BLM	29.8	29.8				0
		PICH	17	3224.7			BLM	2981.6	351.1		BLM	351.1	351.1			2519.7	0
		BLM	18	2667.2			BLM	2838.9	208.4		BLM	208.4	208.4			2047.8	0
		PICH	19	3163.4			BLM	2667.2	36.7		BLM	36.7	36.7			3633.1	0
		BLM	20	3021.8			BLM	3021.8	391.3		BLM	391.3	391.3			2308.4	0
																3570.6	773.2
	deltaBLM + GFP-BLM-delta51_ICRF_GFP-PICH-CEN-38 early ana.czi															2873.8	484.1
	Background	PICH	1	2403.2			PICH	2403.2			PICH					2934.5	601.7
	Background	BLM	2	5120			PICH	7956.5	5553.3		PICH	5553.3	5553.3			2439.2	0
		PICH	3	7956.5			PICH	5903.8	3500.6		PICH	3500.6	3500.6			4335.8	88.7
		BLM	4	5681.7			PICH	6467.4	4064.2		PICH	4064.2	4064.2
		PICH	5	5903.8			PICH	5938.9	3535.7		PICH	3535.7	3535.7			2439.4	46.8
		BLM	6	5221.7			PICH	4618	2214.8		PICH	2214.8	2214.8			2365.4	266.6
		PICH	7	6467.4			PICH	6194.1	3790.9		PICH	3790.9	3790.9			3017.8	315.5
		BLM	8	5746.2			PICH	5851.3	3448.1		PICH	3448.1	3448.1			1760.6	0
		PICH	9	5938.9			BLM	5120			BLM		0			2259.1	105.9
		BLM	10	5753.7			BLM	5681.7	561.7		BLM	561.7	561.7			3341.3	0
		PICH	11	4618			BLM	5221.7	101.7		BLM	101.7	101.7			3456.3	0
		BLM	12	6152			BLM	5746.2	626.2		BLM	626.2	626.2			1284.3	0
		PICH	13	6194.1			BLM	5753.7	633.7		BLM	633.7	633.7			1860.9	0
		BLM	14	6160.3			BLM	6152	1032		BLM	1032	1032			1321	0
		PICH	15	5851.3			BLM	6160.3	1040.3		BLM	1040.3	1040.3
		BLM	16	5818.3			BLM	5818.3	698.3		BLM	698.3	698.3			0	0
																0	171.6
	deltaBLM + GFP-BLM-delta51_ICRF_GFP-PICH-CEN-36 ana-like.czi															0	0
	Background	PICH	1	3587.5			PICH	3587.5			PICH					0	0
	Background	BLM	2	5543.8			PICH	4152.3	564.8		PICH	564.8	564.8			314.3	0
		PICH	3	4152.3			PICH	4635.2	1047.7		PICH	1047.7	1047.7			0	76
		BLM	4	5080.8			PICH	5233.2	1645.7		PICH	1645.7	1645.7			0	0
		PICH	5	4635.2			PICH	7193.8	3606.3		PICH	3606.3	3606.3
		BLM	6	5868.3			PICH	7283	3695.5		PICH	3695.5	3695.5			1423.2	0
		PICH	7	5233.2			PICH	6770.7	3183.2		PICH	3183.2	3183.2			515	0
		BLM	8	5003.9			PICH	7229	3641.5		PICH	3641.5	3641.5			2383.1	163.5
		PICH	9	7193.8			PICH	5114.5	1527		PICH	1527	1527			3520.7	242.1
		BLM	10	5163.9			PICH	5309.5	1722		PICH	1722	1722			726.6	193.5
		PICH	11	7283			PICH	5502.6	1915.1		PICH	1915.1	1915.1			1144.5	195.4
		BLM	12	5535.6			PICH	7774.7	4187.2		PICH	4187.2	4187.2			1138.6	70.7
		PICH	13	6770.7			PICH	5491.6	1904.1		PICH	1904.1	1904.1			1645.5	55.8
		BLM	14	5001.2			PICH	9235.6	5648.1		PICH	5648.1	5648.1			771.5	0
		PICH	15	7229			BLM	5543.8			BLM
		BLM	16	5385.3			BLM	5080.8	-463		BLM	-463	0			1562.1	0
		PICH	17	5114.5			BLM	5868.3	324.5		BLM	324.5	324.5			4238.7	584.1
		BLM	18	4980.1			BLM	5003.9	-539.9		BLM	-539.9	0			2706.6	490.4
		PICH	19	5309.5			BLM	5163.9	-379.9		BLM	-379.9	0			1624.3	408.8
		BLM	20	4768.3			BLM	5535.6	-8.2		BLM	-8.2	0			1784.4	634.6
		PICH	21	5502.6			BLM	5001.2	-542.6		BLM	-542.6	0			1079.8	492.7
		BLM	22	4636.9			BLM	5385.3	-158.5		BLM	-158.5	0			1616.2	428.1
		PICH	23	7774.7			BLM	4980.1	-563.7		BLM	-563.7	0
		BLM	24	4892.9			BLM	4768.3	-775.5		BLM	-775.5	0
		PICH	25	5491.6			BLM	4636.9	-906.9		BLM	-906.9	0
		BLM	26	5308.1			BLM	4892.9	-650.9		BLM	-650.9	0
		PICH	27	9235.6			BLM	5308.1	-235.7		BLM	-235.7	0
		BLM	28	5386.3			BLM	5386.3	-157.5		BLM	-157.5	0
	deltaBLM + GFP-BLM-delta51_ICRF_GFP-PICH-CEN-34 early ana.czi
	Background	PICH	1	3806.7			PICH	3806.7			PICH
	Background	BLM	2	4383.7			PICH	4760.9	954.2		PICH	954.2	954.2
		PICH	3	4760.9			PICH	6578.6	2771.9		PICH	2771.9	2771.9
		BLM	4	4385.4			PICH	7680.1	3873.4		PICH	3873.4	3873.4
		PICH	5	6578.6			PICH	8353.2	4546.5		PICH	4546.5	4546.5
		BLM	6	4712.8			PICH	8549.9	4743.2		PICH	4743.2	4743.2
		PICH	7	7680.1			PICH	8282.3	4475.6		PICH	4475.6	4475.6
		BLM	8	5105.7			PICH	8015.2	4208.5		PICH	4208.5	4208.5
		PICH	9	8353.2			PICH	9720.7	5914		PICH	5914	5914
		BLM	10	4576.2			PICH	8071.4	4264.7		PICH	4264.7	4264.7
		PICH	11	8549.9			PICH	6592.7	2786		PICH	2786	2786
		BLM	12	5064.5			BLM	4383.7			BLM
		PICH	13	8282.3			BLM	4385.4	1.7		BLM	1.7	1.7
		BLM	14	4835.3			BLM	4712.8	329.1		BLM	329.1	329.1
		PICH	15	8015.2			BLM	5105.7	722		BLM	722	722
		BLM	16	5316.9			BLM	4576.2	192.5		BLM	192.5	192.5
		PICH	17	9720.7			BLM	5064.5	680.8		BLM	680.8	680.8
		BLM	18	5648			BLM	4835.3	451.6		BLM	451.6	451.6
		PICH	19	8071.4			BLM	5316.9	933.2		BLM	933.2	933.2
		BLM	20	4675.9			BLM	5648	1264.3		BLM	1264.3	1264.3
		PICH	21	6592.7			BLM	4675.9	292.2		BLM	292.2	292.2
		BLM	22	5184			BLM	5184	800.3		BLM	800.3	800.3
	deltaBLM + GFP-BLM-delta51_ICRF_GFP-PICH-CEN-33 mid ana.czi
	Background	PICH	1	4215			PICH	4215			PICH
	Background	BLM	2	5629.1			PICH	5993.9	1778.9		PICH	1778.9	1778.9
		PICH	3	5993.9			PICH	6146.7	1931.7		PICH	1931.7	1931.7
		BLM	4	5854.6			PICH	7397.1	3182.1		PICH	3182.1	3182.1
		PICH	5	6146.7			PICH	6954.7	2739.7		PICH	2739.7	2739.7
		BLM	6	5862.7			PICH	7192.5	2977.5		PICH	2977.5	2977.5
		PICH	7	7397.1			PICH	8142.8	3927.8		PICH	3927.8	3927.8
		BLM	8	6143.9			PICH	6682.2	2467.2		PICH	2467.2	2467.2
		PICH	9	6954.7			PICH	6459.6	2244.6		PICH	2244.6	2244.6
		BLM	10	6055.7			PICH	6968.3	2753.3		PICH	2753.3	2753.3
		PICH	11	7192.5			BLM	5629.1			BLM
		BLM	12	6073.2			BLM	5854.6	1702.3		BLM	1702.3	1702.3
		PICH	13	8142.8			BLM	5862.7	1710.4		BLM	1710.4	1710.4
		BLM	14	6197.4			BLM	6143.9	1991.6		BLM	1991.6	1991.6
		PICH	15	6682.2			BLM	6055.7	1903.4		BLM	1903.4	1903.4
		BLM	16	5309.9			BLM	6073.2	1920.9		BLM	1920.9	1920.9
		PICH	17	6459.6			BLM	6197.4	2045.1		BLM	2045.1	2045.1
		BLM	18	5284			BLM	5309.9	1157.6		BLM	1157.6	1157.6
		PICH	19	6968.3			BLM	5284	1131.7		BLM	1131.7	1131.7
		BLM	20	5647.2			BLM	5647.2	1494.9		BLM	1494.9	1494.9
	deltaBLM + GFP-BLM-delta51_ICRF_GFP-PICH-CEN-32 ana-like.czi
	Background	PICH	1	3373.6			PICH	3373.6			PICH
	Background	BLM	2	5854.1			PICH	4353.9	980.3		PICH	980.3	980.3
		PICH	3	4353.9			PICH	5900.3	2526.7		PICH	2526.7	2526.7
		BLM	4	5163.1			PICH	6648.8	3275.2		PICH	3275.2	3275.2
		PICH	5	5900.3			PICH	5374.5	2000.9		PICH	2000.9	2000.9
		BLM	6	5468.1			PICH	3936	562.4		PICH	562.4	562.4
		PICH	7	6648.8			PICH	5230.3	1856.7		PICH	1856.7	1856.7
		BLM	8	6217			PICH	4525.6	1152		PICH	1152	1152
		PICH	9	5374.5			PICH	4247.9	874.3		PICH	874.3	874.3
		BLM	10	6443.4			PICH	4242.1	868.5		PICH	868.5	868.5
		PICH	11	3936			BLM	5854.1			BLM
		BLM	12	5404.6			BLM	5163.1	-691		BLM	-691	0
		PICH	13	5230.3			BLM	5468.1	-386		BLM	-386	0
		BLM	14	5291.2			BLM	6217	362.9		BLM	362.9	362.9
		PICH	15	4525.6			BLM	6443.4	589.3		BLM	589.3	589.3
		BLM	16	5272			BLM	5404.6	-449.5		BLM	-449.5	0
		PICH	17	4247.9			BLM	5291.2	-562.9		BLM	-562.9	0
		BLM	18	5128.4			BLM	5272	-582.1		BLM	-582.1	0
		PICH	19	4242.1			BLM	5128.4	-725.7		BLM	-725.7	0
		BLM	20	4895.9			BLM	4895.9	-958.2		BLM	-958.2	0
	deltaBLM + GFP-BLM-delta51_ICRF_GFP-PICH-CEN-31 mid ana.czi
	Background	PICH	1	4226.7			PICH	4226.7			PICH
	Background	BLM	2	3933.1			PICH	6674.9	2448.2		PICH	2448.2	2448.2
		PICH	3	6674.9			PICH	9193.5	4966.8		PICH	4966.8	4966.8
		BLM	4	3866.1			PICH	5294.9	1068.2		PICH	1068.2	1068.2
		PICH	5	9193.5			PICH	7386.6	3159.9		PICH	3159.9	3159.9
		BLM	6	4610.1			PICH	7941.9	3715.2		PICH	3715.2	3715.2
		PICH	7	5294.9			PICH	4850.2	623.5		PICH	623.5	623.5
		BLM	8	3492.3			PICH	11452.9	7226.2		PICH	7226.2	7226.2
		PICH	9	7386.6			BLM	3933.1			BLM		0
		BLM	10	4204.6			BLM	3866.1	-67		BLM	-67	0
		PICH	11	7941.9			BLM	4610.1	677		BLM	677	677
		BLM	12	3919.1			BLM	3492.3	-440.8		BLM	-440.8	0
		PICH	13	4850.2			BLM	4204.6	271.5		BLM	271.5	271.5
		BLM	14	3990.7			BLM	3919.1	-14		BLM	-14	0
		PICH	15	11452.9			BLM	3990.7	57.6		BLM	57.6	57.6
		BLM	16	4443.8			BLM	4443.8	510.7		BLM	510.7	510.7
	deltaBLM + GFP-BLM-delta51_ICRF_GFP-PICH-CEN-30 ana-like.czi
	Background	PICH	1	3050.5			PICH	3050.5			PICH
	Background	BLM	2	5619.8			PICH	7803	4752.5		PICH	4752.5	4752.5
		PICH	3	7803			PICH	7107.7	4057.2		PICH	4057.2	4057.2
		BLM	4	6144.4			PICH	4917.7	1867.2		PICH	1867.2	1867.2
		PICH	5	7107.7			PICH	5553.9	2503.4		PICH	2503.4	2503.4
		BLM	6	6221.5			PICH	4897	1846.5		PICH	1846.5	1846.5
		PICH	7	4917.7			PICH	9292.2	6241.7		PICH	6241.7	6241.7
		BLM	8	5654.2			PICH	6327.7	3277.2		PICH	3277.2	3277.2
		PICH	9	5553.9			PICH	3833.5	783		PICH	783	783
		BLM	10	5430.5			BLM	5619.8			BLM		0
		PICH	11	4897			BLM	6144.4	524.6		BLM	524.6	524.6
		BLM	12	5894.4			BLM	6221.5	601.7		BLM	601.7	601.7
		PICH	13	9292.2			BLM	5654.2	34.4		BLM	34.4	34.4
		BLM	14	6380			BLM	5430.5	-189.3		BLM	-189.3	0
		PICH	15	6327.7			BLM	5894.4	274.6		BLM	274.6	274.6
		BLM	16	5465.6			BLM	6380	760.2		BLM	760.2	760.2
		PICH	17	3833.5			BLM	5465.6	-154.2		BLM	-154.2	0
		BLM	18	6371.1			BLM	6371.1	751.3		BLM	751.3	751.3
	deltaBLM + GFP-BLM-delta51_ICRF_GFP-PICH-CEN-29 mid ana.czi
	Background	PICH	1	3036.9			PICH	3036.9			PICH
	Background	BLM	2	4850.8			PICH	6877.8	3840.9		PICH	3840.9	3840.9
		PICH	3	6877.8			PICH	8959.4	5922.5		PICH	5922.5	5922.5
		BLM	4	5055.4			PICH	5967.3	2930.4		PICH	2930.4	2930.4
		PICH	5	8959.4			PICH	5412.3	2375.4		PICH	2375.4	2375.4
		BLM	6	5516.5			PICH	4553.6	1516.7		PICH	1516.7	1516.7
		PICH	7	5967.3			BLM	4850.8			BLM		0
		BLM	8	4683.8			BLM	5055.4	204.6		BLM	204.6	204.6
		PICH	9	5412.3			BLM	5516.5	665.7		BLM	665.7	665.7
		BLM	10	4842.7			BLM	4683.8	-167		BLM	-167	0
		PICH	11	4553.6			BLM	4842.7	-8.1		BLM	-8.1	0
		BLM	12	4713.9			BLM	4713.9	-136.9		BLM	-136.9	0
	deltaBLM + GFP-BLM-delta51_ICRF_GFP-PICH-CEN-28 mid ana.czi
	Background	PICH	1	2631.2			PICH	2631.2			PICH
	Background	BLM	2	3651.9			PICH	5511.3	2880.1		PICH	2880.1	2880.1
		PICH	3	5511.3			PICH	6027.8	3396.6		PICH	3396.6	3396.6
		BLM	4	3794.2			PICH	4891.5	2260.3		PICH	2260.3	2260.3
		PICH	5	6027.8			PICH	6064.4	3433.2		PICH	3433.2	3433.2
		BLM	6	3616			PICH	5838	3206.8		PICH	3206.8	3206.8
		PICH	7	4891.5			BLM	3651.9			BLM		0
		BLM	8	3686.7			BLM	3794.2	142.3		BLM	142.3	142.3
		PICH	9	6064.4			BLM	3616	-35.9		BLM	-35.9	0
		BLM	10	3825.4			BLM	3686.7	34.8		BLM	34.8	34.8
		PICH	11	5838			BLM	3825.4	173.5		BLM	173.5	173.5
		BLM	12	3763.1			BLM	3763.1	111.2		BLM	111.2	111.2
	deltaBLM + GFP-BLM-delta51_ICRF_GFP-PICH-CEN-27 metaphase-like.czi
	Background	PICH	1	4521.4			PICH	4521.4			PICH
	Background	BLM	2	4284.6			PICH	7681.1	3159.7		PICH	3159.7	3159.7
		PICH	3	7681.1			PICH	8379.4	3858		PICH	3858	3858
		BLM	4	4593.5			PICH	6678.5	2157.1		PICH	2157.1	2157.1
		PICH	5	8379.4			PICH	8156.8	3635.4		PICH	3635.4	3635.4
		BLM	6	4730.4			PICH	13475.7	8954.3		PICH	8954.3	8954.3
		PICH	7	6678.5			PICH	8881.4	4360		PICH	4360	4360
		BLM	8	4854.3			PICH	8572.4	4051		PICH	4051	4051
		PICH	9	8156.8			PICH	12076.1	7554.7		PICH	7554.7	7554.7
		BLM	10	5340.4			PICH	9888.6	5367.2		PICH	5367.2	5367.2
		PICH	11	13475.7			PICH	8363.5	3842.1		PICH	3842.1	3842.1
		BLM	12	5370.2			PICH	8246.9	3725.5		PICH	3725.5	3725.5
		PICH	13	8881.4			PICH	7520.4	2999		PICH	2999	2999
		BLM	14	5282.9			BLM	4284.6			BLM		0
		PICH	15	8572.4			BLM	4593.5	308.9		BLM	308.9	308.9
		BLM	16	5133.6			BLM	4730.4	445.8		BLM	445.8	445.8
		PICH	17	12076.1			BLM	4854.3	569.7		BLM	569.7	569.7
		BLM	18	5560.9			BLM	5340.4	1055.8		BLM	1055.8	1055.8
		PICH	19	9888.6			BLM	5370.2	1085.6		BLM	1085.6	1085.6
		BLM	20	5037.6			BLM	5282.9	998.3		BLM	998.3	998.3
		PICH	21	8363.5			BLM	5133.6	849		BLM	849	849
		BLM	22	4588.6			BLM	5560.9	1276.3		BLM	1276.3	1276.3
		PICH	23	8246.9			BLM	5037.6	753		BLM	753	753
		BLM	24	4666.3			BLM	4588.6	304		BLM	304	304
		PICH	25	7520.4			BLM	4666.3	381.7		BLM	381.7	381.7
		BLM	26	4660.1			BLM	4660.1	375.5		BLM	375.5	375.5
	deltaBLM + GFP-BLM-delta51_ICRF_GFP-PICH-CEN-20 meta-like.czi
	Background	PICH	1	3661.5			PICH	3661.5			PICH
	Background	BLM	2	4985			PICH	6264.5	2603		PICH	2603	2603
		PICH	3	6264.5			PICH	5145.8	1484.3		PICH	1484.3	1484.3
		BLM	4	4989.9			PICH	4882	1220.5		PICH	1220.5	1220.5
		PICH	5	5145.8			PICH	5154.3	1492.8		PICH	1492.8	1492.8
		BLM	6	4792			PICH	5484.8	1823.3		PICH	1823.3	1823.3
		PICH	7	4882			PICH	5458	1796.5		PICH	1796.5	1796.5
		BLM	8	5070.7			PICH	4479.3	817.8		PICH	817.8	817.8
		PICH	9	5154.3			PICH	5285.7	1624.2		PICH	1624.2	1624.2
		BLM	10	4669.3			BLM	4985			BLM
		PICH	11	5484.8			BLM	4989.9	4.9		BLM	4.9	4.9
		BLM	12	4976.3			BLM	4792	-193		BLM	-193	0
		PICH	13	5458			BLM	5070.7	85.7		BLM	85.7	85.7
		BLM	14	5294.2			BLM	4669.3	-315.7		BLM	-315.7	0
		PICH	15	4479.3			BLM	4976.3	-8.7		BLM	-8.7	0
		BLM	16	4338.5			BLM	5294.2	309.2		BLM	309.2	309.2
		PICH	17	5285.7			BLM	4338.5	-646.5		BLM	-646.5	0
		BLM	18	4877.4			BLM	4877.4	-107.6		BLM	-107.6	0
	deltaBLM + GFP-BLM-delta51_ICRF_GFP-PICH-CEN-19 ana-like.czi
	Background	PICH	1	4033.6			PICH	4033.6			PICH
	Background	BLM	2	4897			PICH	9168.8	5135.2		PICH	5135.2	5135.2
		PICH	3	9168.8			PICH	5633.2	1599.6		PICH	1599.6	1599.6
		BLM	4	4977.1			PICH	9429.2	5395.6		PICH	5395.6	5395.6
		PICH	5	5633.2			PICH	7916.6	3883		PICH	3883	3883
		BLM	6	4520.6			PICH	9445.2	5411.6		PICH	5411.6	5411.6
		PICH	7	9429.2			PICH	7516.8	3483.2		PICH	3483.2	3483.2
		BLM	8	5235.4			PICH	8513.3	4479.7		PICH	4479.7	4479.7
		PICH	9	7916.6			PICH	8705.8	4672.2		PICH	4672.2	4672.2
		BLM	10	5231.9			PICH	8706.2	4672.6		PICH	4672.6	4672.6
		PICH	11	9445.2			PICH	9483.7	5450.1		PICH	5450.1	5450.1
		BLM	12	5049.3			PICH	7685.7	3652.1		PICH	3652.1	3652.1
		PICH	13	7516.8			PICH	6447.1	2413.5		PICH	2413.5	2413.5
		BLM	14	4983.5			BLM	4897			BLM
		PICH	15	8513.3			BLM	4977.1	80.1		BLM	80.1	80.1
		BLM	16	5233.4			BLM	4520.6	-376.4		BLM	-376.4	0
		PICH	17	8705.8			BLM	5235.4	338.4		BLM	338.4	338.4
		BLM	18	5224.7			BLM	5231.9	334.9		BLM	334.9	334.9
		PICH	19	8706.2			BLM	5049.3	152.3		BLM	152.3	152.3
		BLM	20	5173.9			BLM	4983.5	86.5		BLM	86.5	86.5
		PICH	21	9483.7			BLM	5233.4	336.4		BLM	336.4	336.4
		BLM	22	5386.1			BLM	5224.7	327.7		BLM	327.7	327.7
		PICH	23	7685.7			BLM	5173.9	276.9		BLM	276.9	276.9
		BLM	24	5051.3			BLM	5386.1	489.1		BLM	489.1	489.1
		PICH	25	6447.1			BLM	5051.3	154.3		BLM	154.3	154.3
		BLM	26	4981.3			BLM	4981.3	84.3		BLM	84.3	84.3
	deltaBLM + GFP-BLM-delta51_ICRF_GFP-PICH-CEN-18 mid ana.czi
	Background	PICH	1	2998.4			PICH	2998.4			PICH
	Background	BLM	2	7268.1			PICH	3270.8	272.4		PICH	272.4	272.4
		PICH	3	3270.8			PICH	4662.9	1664.5		PICH	1664.5	1664.5
		BLM	4	6063.8			PICH	4820.1	1821.7		PICH	1821.7	1821.7
		PICH	5	4662.9			PICH	4451.8	1453.4		PICH	1453.4	1453.4
		BLM	6	7001.8			PICH	4402.3	1403.9		PICH	1403.9	1403.9
		PICH	7	4820.1			PICH	4807.6	1809.2		PICH	1809.2	1809.2
		BLM	8	7383			PICH	5095.8	2097.4		PICH	2097.4	2097.4
		PICH	9	4451.8			BLM	7268.1			BLM		0
		BLM	10	7104.5			BLM	6063.8	-1204.3		BLM	-1204.3	0
		PICH	11	4402.3			BLM	7001.8	-266.3		BLM	-266.3	0
		BLM	12	7338.3			BLM	7383	114.9		BLM	114.9	114.9
		PICH	13	4807.6			BLM	7104.5	-163.6		BLM	-163.6	0
		BLM	14	7125.6			BLM	7338.3	70.2		BLM	70.2	70.2
		PICH	15	5095.8			BLM	7125.6	-142.5		BLM	-142.5	0
		BLM	16	6890.7			BLM	6890.7	-377.4		BLM	-377.4	0
	deltaBLM + GFP-BLM-delta51_ICRF_GFP-PICH-CEN-17 mid ana.czi
	Background	PICH	1	3462.6			PICH	3462.6			PICH
	Background	BLM	2	7556.9			PICH	7598.6	4136		PICH	4136	4136
		PICH	3	7598.6			PICH	4406.6	944		PICH	944	944
		BLM	4	8048.4			PICH	4776.4	1313.8		PICH	1313.8	1313.8
		PICH	5	4406.6			PICH	6137.7	2675.1		PICH	2675.1	2675.1
		BLM	6	7435.8			PICH	5895.7	2433.1		PICH	2433.1	2433.1
		PICH	7	4776.4			PICH	5376.8	1914.2		PICH	1914.2	1914.2
		BLM	8	7752.5			PICH	6033.9	2571.3		PICH	2571.3	2571.3
		PICH	9	6137.7			BLM	7556.9			BLM		0
		BLM	10	7487.6			BLM	8048.4	491.5		BLM	491.5	491.5
		PICH	11	5895.7			BLM	7435.8	-121.1		BLM	-121.1	0
		BLM	12	7420.9			BLM	7752.5	195.6		BLM	195.6	195.6
		PICH	13	5376.8			BLM	7487.6	-69.3		BLM	-69.3	0
		BLM	14	7657.2			BLM	7420.9	-136		BLM	-136	0
		PICH	15	6033.9			BLM	7657.2	100.3		BLM	100.3	100.3
		BLM	16	7530.1			BLM	7530.1	-26.8		BLM	-26.8	0
	deltaBLM + GFP-BLM-delta51_ICRF_GFP-PICH-CEN-16 metaphase-like.czi
	Background	PICH	1	4702.6			PICH	4702.6			PICH
	Background	BLM	2	4678.3			PICH	7085.2	2382.6		PICH	2382.6	2382.6
		PICH	3	7085.2			PICH	10008.3	5305.7		PICH	5305.7	5305.7
		BLM	4	5014.3			PICH	10132.7	5430.1		PICH	5430.1	5430.1
		PICH	5	10008.3			PICH	8361.3	3658.7		PICH	3658.7	3658.7
		BLM	6	4816.5			PICH	9541	4838.4		PICH	4838.4	4838.4
		PICH	7	10132.7			PICH	7235	2532.4		PICH	2532.4	2532.4
		BLM	8	4863.8			PICH	8001.8	3299.2		PICH	3299.2	3299.2
		PICH	9	8361.3			PICH	8412.1	3709.5		PICH	3709.5	3709.5
		BLM	10	4861.3			PICH	7134.4	2431.8		PICH	2431.8	2431.8
		PICH	11	9541			PICH	8969.7	4267.1		PICH	4267.1	4267.1
		BLM	12	5082.1			PICH	8308.6	3606		PICH	3606	3606
		PICH	13	7235			PICH	6597.9	1895.3		PICH	1895.3	1895.3
		BLM	14	5036.4			BLM	4678.3			BLM		0
		PICH	15	8001.8			BLM	5014.3	336		BLM	336	336
		BLM	16	4827.1			BLM	4816.5	138.2		BLM	138.2	138.2
		PICH	17	8412.1			BLM	4863.8	185.5		BLM	185.5	185.5
		BLM	18	4484.2			BLM	4861.3	183		BLM	183	183
		PICH	19	7134.4			BLM	5082.1	403.8		BLM	403.8	403.8
		BLM	20	4492.1			BLM	5036.4	358.1		BLM	358.1	358.1
		PICH	21	8969.7			BLM	4827.1	148.8		BLM	148.8	148.8
		BLM	22	4549			BLM	4484.2	-194.1		BLM	-194.1	0
		PICH	23	8308.6			BLM	4492.1	-186.2		BLM	-186.2	0
		BLM	24	4751.9			BLM	4549	-129.3		BLM	-129.3	0
		PICH	25	6597.9			BLM	4751.9	73.6		BLM	73.6	73.6
		BLM	26	4754.6			BLM	4754.6	76.3		BLM	76.3	76.3
	deltaBLM + GFP-BLM-delta51_ICRF_GFP-PICH-CEN-15 early ana.czi
	Background	PICH	1	3340.5			PICH	3340.5			PICH
	Background	BLM	2	7961.8			PICH	5237.2	1896.7		PICH	1896.7	1896.7
		PICH	3	5237.2			PICH	5517.5	2177		PICH	2177	2177
		BLM	4	8147.2			PICH	5761.7	2421.2		PICH	2421.2	2421.2
		PICH	5	5517.5			PICH	5495.2	2154.7		PICH	2154.7	2154.7
		BLM	6	8159.4			PICH	6638.5	3298		PICH	3298	3298
		PICH	7	5761.7			PICH	5333.6	1993.1		PICH	1993.1	1993.1
		BLM	8	8112.2			PICH	5263.2	1922.7		PICH	1922.7	1922.7
		PICH	9	5495.2			PICH	5323.4	1982.9		PICH	1982.9	1982.9
		BLM	10	8024			BLM	7961.8			BLM		0
		PICH	11	6638.5			BLM	8147.2	185.4		BLM	185.4	185.4
		BLM	12	8151.1			BLM	8159.4	197.6		BLM	197.6	197.6
		PICH	13	5333.6			BLM	8112.2	150.4		BLM	150.4	150.4
		BLM	14	7711.3			BLM	8024	62.2		BLM	62.2	62.2
		PICH	15	5263.2			BLM	8151.1	189.3		BLM	189.3	189.3
		BLM	16	8486.5			BLM	7711.3	-250.5		BLM	-250.5	0
		PICH	17	5323.4			BLM	8486.5	524.7		BLM	524.7	524.7
		BLM	18	8454.2			BLM	8454.2	492.4		BLM	492.4	492.4
	deltaBLM + GFP-BLM-delta51_ICRF_GFP-PICH-CEN-14 metaphase-like.czi
	Background	PICH	1	2516.3			PICH	2516.3			PICH
	Background	BLM	2	6207			PICH	5040.1	2523.8		PICH	2523.8	2523.8
		PICH	3	5040.1			PICH	4050.4	1534.1		PICH	1534.1	1534.1
		BLM	4	5737.8			PICH	5541.5	3025.2		PICH	3025.2	3025.2
		PICH	5	4050.4			PICH	4398.5	1882.2		PICH	1882.2	1882.2
		BLM	6	5340			PICH	4971.6	2455.3		PICH	2455.3	2455.3
		PICH	7	5541.5			PICH	3943.6	1427.3		PICH	1427.3	1427.3
		BLM	8	6211.9			PICH	3852.3	1336		PICH	1336	1336
		PICH	9	4398.5			BLM	6207			BLM		0
		BLM	10	5672.6			BLM	5737.8	-469.2		BLM	-469.2	0
		PICH	11	4971.6			BLM	5340	-867		BLM	-867	0
		BLM	12	5604.2			BLM	6211.9	4.9		BLM	4.9	4.9
		PICH	13	3943.6			BLM	5672.6	-534.4		BLM	-534.4	0
		BLM	14	5827.8			BLM	5604.2	-602.8		BLM	-602.8	0
		PICH	15	3852.3			BLM	5827.8	-379.2		BLM	-379.2	0
		BLM	16	5721.3			BLM	5721.3	-485.7		BLM	-485.7	0
	deltaBLM + GFP-BLM-delta51_ICRF_GFP-PICH-CEN-13 early ana.czi
	Background	PICH	1	3671			PICH	3671			PICH
	Background	BLM	2	7106.4			PICH	5871	2200		PICH	2200	2200
		PICH	3	5871			PICH	7073.7	3402.7		PICH	3402.7	3402.7
		BLM	4	7097.8			PICH	6458.4	2787.4		PICH	2787.4	2787.4
		PICH	5	7073.7			PICH	6243.8	2572.8		PICH	2572.8	2572.8
		BLM	6	7212.8			PICH	6544.1	2873.1		PICH	2873.1	2873.1
		PICH	7	6458.4			PICH	5950.4	2279.4		PICH	2279.4	2279.4
		BLM	8	7073.7			PICH	5147.7	1476.7		PICH	1476.7	1476.7
		PICH	9	6243.8			PICH	6156.4	2485.4		PICH	2485.4	2485.4
		BLM	10	6964.6			BLM	7106.4			BLM
		PICH	11	6544.1			BLM	7097.8	-8.6		BLM	-8.6	0
		BLM	12	7277.5			BLM	7212.8	106.4		BLM	106.4	106.4
		PICH	13	5950.4			BLM	7073.7	-32.7		BLM	-32.7	0
		BLM	14	7549.3			BLM	6964.6	-141.8		BLM	-141.8	0
		PICH	15	5147.7			BLM	7277.5	171.1		BLM	171.1	171.1
		BLM	16	7423.6			BLM	7549.3	442.9		BLM	442.9	442.9
		PICH	17	6156.4			BLM	7423.6	317.2		BLM	317.2	317.2
		BLM	18	7512.6			BLM	7512.6	406.2		BLM	406.2	406.2
	deltaBLM + GFP-BLM-delta51_ICRF_GFP-PICH-CEN-12 metaphase-like.czi
	Background	PICH	1	4973.9			PICH	4973.9			PICH
	Background	BLM	2	4323.5			PICH	6066.7	1092.8		PICH	1092.8	1092.8
		PICH	3	6066.7			PICH	6389.9	1416		PICH	1416	1416
		BLM	4	4439.2			PICH	6396.8	1422.9		PICH	1422.9	1422.9
		PICH	5	6389.9			PICH	6325.8	1351.9		PICH	1351.9	1351.9
		BLM	6	4412.2			PICH	8987.2	4013.3		PICH	4013.3	4013.3
		PICH	7	6396.8			PICH	7524.2	2550.3		PICH	2550.3	2550.3
		BLM	8	4523			PICH	7578.1	2604.2		PICH	2604.2	2604.2
		PICH	9	6325.8			PICH	5730.5	756.6		PICH	756.6	756.6
		BLM	10	4468.5			PICH	6734.6	1760.7		PICH	1760.7	1760.7
		PICH	11	8987.2			BLM	4323.5			BLM
		BLM	12	4584			BLM	4439.2	115.7		BLM	115.7	115.7
		PICH	13	7524.2			BLM	4412.2	88.7		BLM	88.7	88.7
		BLM	14	4548.3			BLM	4523	199.5		BLM	199.5	199.5
		PICH	15	7578.1			BLM	4468.5	145		BLM	145	145
		BLM	16	4431.7			BLM	4584	260.5		BLM	260.5	260.5
		PICH	17	5730.5			BLM	4548.3	224.8		BLM	224.8	224.8
		BLM	18	4349.8			BLM	4431.7	108.2		BLM	108.2	108.2
		PICH	19	6734.6			BLM	4349.8	26.3		BLM	26.3	26.3
		BLM	20	4505.1			BLM	4505.1	181.6		BLM	181.6	181.6
	deltaBLM + GFP-BLM-delta51_ICRF_GFP-PICH-CEN-09 ana-like.czi
	Background	PICH	1	5032.8			PICH	5032.8			PICH
	Background	BLM	2	6439.2			PICH	8225.4	3192.6		PICH	3192.6	3192.6
		PICH	3	8225.4			PICH	9672.4	4639.6		PICH	4639.6	4639.6
		BLM	4	6588.1			PICH	10813	5780.2		PICH	5780.2	5780.2
		PICH	5	9672.4			PICH	9753.7	4720.9		PICH	4720.9	4720.9
		BLM	6	6546.1			PICH	10487.5	5454.7		PICH	5454.7	5454.7
		PICH	7	10813			PICH	11187.8	6155		PICH	6155	6155
		BLM	8	7130.5			PICH	11836.7	6803.9		PICH	6803.9	6803.9
		PICH	9	9753.7			PICH	13405.2	8372.4		PICH	8372.4	8372.4
		BLM	10	6679.1			PICH	8863.4	3830.6		PICH	3830.6	3830.6
		PICH	11	10487.5			PICH	8393.7	3360.9		PICH	3360.9	3360.9
		BLM	12	6337.7			PICH	10397.6	5364.8		PICH	5364.8	5364.8
		PICH	13	11187.8			PICH	8418.1	3385.3		PICH	3385.3	3385.3
		BLM	14	6625.8			BLM	6439.2			BLM
		PICH	15	11836.7			BLM	6588.1	148.9		BLM	148.9	148.9
		BLM	16	6821.7			BLM	6546.1	106.9		BLM	106.9	106.9
		PICH	17	13405.2			BLM	7130.5	691.3		BLM	691.3	691.3
		BLM	18	6510.1			BLM	6679.1	239.9		BLM	239.9	239.9
		PICH	19	8863.4			BLM	6337.7	-101.5		BLM	-101.5	0
		BLM	20	6316.2			BLM	6625.8	186.6		BLM	186.6	186.6
		PICH	21	8393.7			BLM	6821.7	382.5		BLM	382.5	382.5
		BLM	22	5691			BLM	6510.1	70.9		BLM	70.9	70.9
		PICH	23	10397.6			BLM	6316.2	-123		BLM	-123	0
		BLM	24	5105.1			BLM	5691	-748.2		BLM	-748.2	0
		PICH	25	8418.1			BLM	5105.1	-1334.1		BLM	-1334.1	0
		BLM	26	6650.3			BLM	6650.3	211.1		BLM	211.1	211.1
	deltaBLM + GFP-BLM-delta51_ICRF_GFP-PICH-CEN-08 ana-like.czi
	Background	PICH	1	3032.1			PICH	3032.1			PICH
	Background	BLM	2	6283.4			PICH	7895.4	4863.3		PICH	4863.3	4863.3
		PICH	3	7895.4			PICH	8736.8	5704.7		PICH	5704.7	5704.7
		BLM	4	7040			PICH	8658.1	5626		PICH	5626	5626
		PICH	5	8736.8			PICH	8456.5	5424.4		PICH	5424.4	5424.4
		BLM	6	7204.5			PICH	8148.2	5116.1		PICH	5116.1	5116.1
		PICH	7	8658.1			PICH	7955.7	4923.6		PICH	4923.6	4923.6
		BLM	8	6909.1			PICH	9587.8	6555.7		PICH	6555.7	6555.7
		PICH	9	8456.5			BLM	6283.4			BLM
		BLM	10	6658.7			BLM	7040	756.6		BLM	756.6	756.6
		PICH	11	8148.2			BLM	7204.5	921.1		BLM	921.1	921.1
		BLM	12	6903.6			BLM	6909.1	625.7		BLM	625.7	625.7
		PICH	13	7955.7			BLM	6658.7	375.3		BLM	375.3	375.3
		BLM	14	6762.4			BLM	6903.6	620.2		BLM	620.2	620.2
		PICH	15	9587.8			BLM	6762.4	479		BLM	479	479
		BLM	16	7258.6			BLM	7258.6	975.2		BLM	975.2	975.2
	deltaBLM + GFP-BLM-delta51_ICRF_GFP-PICH-CEN-05 ana-like.czi
	Background	PICH	1	2891.4			PICH	2891.4			PICH
	Background	BLM	2	6230.6			PICH	5411.1	2519.7		PICH	2519.7	2519.7
		PICH	3	5411.1			PICH	4939.2	2047.8		PICH	2047.8	2047.8
		BLM	4	5688.3			PICH	6524.5	3633.1		PICH	3633.1	3633.1
		PICH	5	4939.2			PICH	5199.8	2308.4		PICH	2308.4	2308.4
		BLM	6	5849			PICH	6462	3570.6		PICH	3570.6	3570.6
		PICH	7	6524.5			PICH	5765.2	2873.8		PICH	2873.8	2873.8
		BLM	8	6218.1			PICH	5825.9	2934.5		PICH	2934.5	2934.5
		PICH	9	5199.8			PICH	5330.6	2439.2		PICH	2439.2	2439.2
		BLM	10	5502.6			PICH	7227.2	4335.8		PICH	4335.8	4335.8
		PICH	11	6462			BLM	6230.6			BLM		0
		BLM	12	7003.8			BLM	5688.3	-542.3		BLM	-542.3	0
		PICH	13	5765.2			BLM	5849	-381.6		BLM	-381.6	0
		BLM	14	6714.7			BLM	6218.1	-12.5		BLM	-12.5	0
		PICH	15	5825.9			BLM	5502.6	-728		BLM	-728	0
		BLM	16	6832.3			BLM	7003.8	773.2		BLM	773.2	773.2
		PICH	17	5330.6			BLM	6714.7	484.1		BLM	484.1	484.1
		BLM	18	5830.6			BLM	6832.3	601.7		BLM	601.7	601.7
		PICH	19	7227.2			BLM	5830.6	-400		BLM	-400	0
		BLM	20	6319.3			BLM	6319.3	88.7		BLM	88.7	88.7
	deltaBLM + GFP-BLM-delta51_ICRF_GFP-PICH-CEN-04 early ana.czi
	Background	PICH	1	2849.2			PICH	2849.2			PICH
	Background	BLM	2	5230.4			PICH	5288.6	2439.4		PICH	2439.4	2439.4
		PICH	3	5288.6			PICH	5214.6	2365.4		PICH	2365.4	2365.4
		BLM	4	5277.2			PICH	5867	3017.8		PICH	3017.8	3017.8
		PICH	5	5214.6			PICH	4609.8	1760.6		PICH	1760.6	1760.6
		BLM	6	5497			PICH	5108.3	2259.1		PICH	2259.1	2259.1
		PICH	7	5867			PICH	6190.5	3341.3		PICH	3341.3	3341.3
		BLM	8	5545.9			PICH	6305.5	3456.3		PICH	3456.3	3456.3
		PICH	9	4609.8			PICH	4133.5	1284.3		PICH	1284.3	1284.3
		BLM	10	5196.6			PICH	4710.1	1860.9		PICH	1860.9	1860.9
		PICH	11	5108.3			PICH	4170.2	1321		PICH	1321	1321
		BLM	12	5336.3			BLM	5230.4			BLM
		PICH	13	6190.5			BLM	5277.2	46.8		BLM	46.8	46.8
		BLM	14	5057.2			BLM	5497	266.6		BLM	266.6	266.6
		PICH	15	6305.5			BLM	5545.9	315.5		BLM	315.5	315.5
		BLM	16	4886.2			BLM	5196.6	-33.8		BLM	-33.8	0
		PICH	17	4133.5			BLM	5336.3	105.9		BLM	105.9	105.9
		BLM	18	4203			BLM	5057.2	-173.2		BLM	-173.2	0
		PICH	19	4710.1			BLM	4886.2	-344.2		BLM	-344.2	0
		BLM	20	4431.3			BLM	4203	-1027.4		BLM	-1027.4	0
		PICH	21	4170.2			BLM	4431.3	-799.1		BLM	-799.1	0
		BLM	22	4551.5			BLM	4551.5	-678.9		BLM	-678.9	0
	deltaBLM + GFP-BLM-delta51_ICRF_GFP-PICH-CEN-03 meta-like.czi
	Background	PICH	1	4464.2			PICH	4464.2			PICH
	Background	BLM	2	8705.3			PICH	7343.4	-1402.3		PICH	-1402.3	0
		PICH	3	7343.4			PICH	8745.7	0		PICH	0	0
		BLM	4	7743.5			PICH	7828.2	-917.5		PICH	-917.5	0
		PICH	5	8745.7			PICH	7005.6	-1740.1		PICH	-1740.1	0
		BLM	6	8876.9			PICH	9060	314.3		PICH	314.3	314.3
		PICH	7	7828.2			PICH	7872.7	-873		PICH	-873	0
		BLM	8	8693.8			PICH	6110.1	-2635.6		PICH	-2635.6	0
		PICH	9	7005.6			BLM	8705.3			BLM
		BLM	10	8258.6			BLM	7743.5	-961.8		BLM	-961.8	0
		PICH	11	9060			BLM	8876.9	171.6		BLM	171.6	171.6
		BLM	12	7802.3			BLM	8693.8	-11.5		BLM	-11.5	0
		PICH	13	7872.7			BLM	8258.6	-446.7		BLM	-446.7	0
		BLM	14	8781.3			BLM	7802.3	-903		BLM	-903	0
		PICH	15	6110.1			BLM	8781.3	76		BLM	76	76
		BLM	16	8536			BLM	8536	-169.3		BLM	-169.3	0
	deltaBLM + GFP-BLM-delta51_ICRF_GFP-PICH-CEN-02 early ana.czi
	Background	PICH	1	3704.1			PICH	3704.1			PICH
	Background	BLM	2	4754.1			PICH	5127.3	1423.2		PICH	1423.2	1423.2
		PICH	3	5127.3			PICH	4219.1	515		PICH	515	515
		BLM	4	4722.9			PICH	6087.2	2383.1		PICH	2383.1	2383.1
		PICH	5	4219.1			PICH	7224.8	3520.7		PICH	3520.7	3520.7
		BLM	6	4721			PICH	4430.7	726.6		PICH	726.6	726.6
		PICH	7	6087.2			PICH	4848.6	1144.5		PICH	1144.5	1144.5
		BLM	8	4917.6			PICH	4842.7	1138.6		PICH	1138.6	1138.6
		PICH	9	7224.8			PICH	5349.6	1645.5		PICH	1645.5	1645.5
		BLM	10	4996.2			PICH	4475.6	771.5		PICH	771.5	771.5
		PICH	11	4430.7			BLM	4754.1			BLM
		BLM	12	4947.6			BLM	4722.9	-31.2		BLM	-31.2	0
		PICH	13	4848.6			BLM	4721	-33.1		BLM	-33.1	0
		BLM	14	4949.5			BLM	4917.6	163.5		BLM	163.5	163.5
		PICH	15	4842.7			BLM	4996.2	242.1		BLM	242.1	242.1
		BLM	16	4824.8			BLM	4947.6	193.5		BLM	193.5	193.5
		PICH	17	5349.6			BLM	4949.5	195.4		BLM	195.4	195.4
		BLM	18	4809.9			BLM	4824.8	70.7		BLM	70.7	70.7
		PICH	19	4475.6			BLM	4809.9	55.8		BLM	55.8	55.8
		BLM	20	4708.7			BLM	4708.7	-45.4		BLM	-45.4	0
	deltaBLM + GFP-BLM-delta51_ICRF_GFP-PICH-CEN early ana.czi
	Background	PICH	1	3883.4			PICH	3883.4			PICH
	Background	BLM	2	5762.5			PICH	5445.5	1562.1		PICH	1562.1	1562.1
		PICH	3	5445.5			PICH	8122.1	4238.7		PICH	4238.7	4238.7
		BLM	4	5522.2			PICH	6590	2706.6		PICH	2706.6	2706.6
		PICH	5	8122.1			PICH	5507.7	1624.3		PICH	1624.3	1624.3
		BLM	6	6346.6			PICH	5667.8	1784.4		PICH	1784.4	1784.4
		PICH	7	6590			PICH	4963.2	1079.8		PICH	1079.8	1079.8
		BLM	8	6252.9			PICH	5499.6	1616.2		PICH	1616.2	1616.2
		PICH	9	5507.7			BLM	5762.5			BLM
		BLM	10	6171.3			BLM	5522.2	-240.3		BLM	-240.3	0
		PICH	11	5667.8			BLM	6346.6	584.1		BLM	584.1	584.1
		BLM	12	6397.1			BLM	6252.9	490.4		BLM	490.4	490.4
		PICH	13	4963.2			BLM	6171.3	408.8		BLM	408.8	408.8
		BLM	14	6255.2			BLM	6397.1	634.6		BLM	634.6	634.6
		PICH	15	5499.6			BLM	6255.2	492.7		BLM	492.7	492.7
		BLM	16	6190.6			BLM	6190.6	428.1		BLM	428.1	428.1

## Sheet: GFP-delta13 Analysis
																PICH and BLM
	GFP-BLM delta13					Background correction										PICH	BLM
	deltaBLM + GFP-BLM-delta13_ICRF_GFP-PICH-CEN-79 mid ana.czi			Mean			PICH	4054				PICH	1323.3			1323.3	0
	Background	PICH	1	4054			PICH	5377.3	1323.3	1323.3		PICH	2424.6			2424.6	439.4
	Background	BLM	2	14795.5			PICH	6478.6	2424.6	2424.6		PICH	1995.8			1995.8	1812.5
		PICH	3	5377.3			PICH	6049.8	1995.8	1995.8		PICH	2709.6			2709.6	523.7
		BLM	4	12440.6			PICH	6763.6	2709.6	2709.6		PICH	1527			1527	0
		PICH	5	6478.6			PICH	5581	1527	1527		PICH	2508.3			2508.3	415.2
		BLM	6	15234.9			PICH	6562.3	2508.3	2508.3		PICH	573.9			573.9	0
		PICH	7	6049.8			PICH	4627.9	573.9	573.9		PICH	717			717	489.8
		BLM	8	16608			PICH	4771	717	717		PICH	2108.7			2108.7	0
		PICH	9	6763.6			PICH	6162.7	2108.7	2108.7		PICH
		BLM	10	15319.2			BLM	14795.5				PICH	3152.7			3152.7	0
		PICH	11	5581			BLM	12440.6	-2354.9	0		PICH	3744.5			3744.5	0
		BLM	12	14722.1			BLM	15234.9	439.4	439.4		PICH	2854.2			2854.2	1955.8
		PICH	13	6562.3			BLM	16608	1812.5	1812.5		PICH	4079.1			4079.1	995.7
		BLM	14	15210.7			BLM	15319.2	523.7	523.7		PICH	2718.3			2718.3	1835
		PICH	15	4627.9			BLM	14722.1	-73.4	0		PICH	5384.1			5384.1	0
		BLM	16	13617.8			BLM	15210.7	415.2	415.2		PICH	3138.4			3138.4	1132.3
		PICH	17	4771			BLM	13617.8	-1177.7	0		PICH	2387.1			2387.1	0
		BLM	18	15285.3			BLM	15285.3	489.8	489.8		PICH	2380.8			2380.8	0
		PICH	19	6162.7			BLM	12667.2	-2128.3	0		PICH	1975.9			1975.9	0
		BLM	20	12667.2
												PICH	0			0
												PICH	3311.8			3311.8	0
												PICH	3079.8			3079.8	1661
	deltaBLM + GFP-BLM-delta13_ICRF_GFP-PICH-CEN-78 early ana.czi											PICH	4554.6			4554.6	2092.3
		PICH	1	3830.8			PICH	3830.8				PICH	3606.3			3606.3	1216.8
		BLM	2	20495.9			PICH	6983.5	3152.7	3152.7		PICH	2836.9			2836.9	1606.1
		PICH	3	6983.5			PICH	7575.3	3744.5	3744.5		PICH	3799.3			3799.3	1476.7
		BLM	4	19477.5			PICH	6685	2854.2	2854.2		PICH	2457.7			2457.7	0
		PICH	5	7575.3			PICH	7909.9	4079.1	4079.1		PICH	1605.5			1605.5	0
		BLM	6	20479.5			PICH	6549.1	2718.3	2718.3		PICH
		PICH	7	6685			PICH	9214.9	5384.1	5384.1		PICH	2560.1			2560.1	0
		BLM	8	22451.7			PICH	6969.2	3138.4	3138.4		PICH	2704.3			2704.3	0
		PICH	9	7909.9			PICH	6217.9	2387.1	2387.1		PICH	4316.7			4316.7	330.6
		BLM	10	21491.6			PICH	6211.6	2380.8	2380.8		PICH	3054.7			3054.7	0
		PICH	11	6549.1			PICH	5806.7	1975.9	1975.9		PICH	2787.9			2787.9	0
		BLM	12	22330.9								PICH	1786.9			1786.9	0
		PICH	13	9214.9			BLM	20495.9				PICH	5257.5			5257.5	973.9
		BLM	14	20128.9			BLM	19477.5	-1018.4	0		PICH
		PICH	15	6969.2			BLM	20479.5	-16.4	0		PICH	1585.9			1585.9	419.1
		BLM	16	21628.2			BLM	22451.7	1955.8	1955.8		PICH	2082.5			2082.5	0
		PICH	17	6217.9			BLM	21491.6	995.7	995.7		PICH	1467.3			1467.3	177.5
		BLM	18	20072.1			BLM	22330.9	1835	1835		PICH	2139.1			2139.1	0
		PICH	19	6211.6			BLM	20128.9	-367	0		PICH	1047.5			1047.5	0
		BLM	20	20311.1			BLM	21628.2	1132.3	1132.3		PICH	1188.5			1188.5	0
		PICH	21	5806.7			BLM	20072.1	-423.8	0		PICH
		BLM	22	19483.9			BLM	20311.1	-184.8	0		PICH	1771.3			1771.3	0
							BLM	19483.9	-1012	0		PICH	2379.1			2379.1	0
												PICH	3471.3			3471.3	0
												PICH	2351.5			2351.5	335.3
	deltaBLM + GFP-BLM-delta13_ICRF_GFP-PICH-CEN-77 early ana.czi											PICH	2878.9			2878.9	0
		PICH	1	2836			PICH	2836		0		PICH	1543.6			1543.6	414.5
		BLM	2	22138			PICH	6147.8	3311.8	3311.8		PICH	3311.9			3311.9	626.2
		PICH	3	6147.8			PICH	5915.8	3079.8	3079.8		PICH	2302.9			2302.9	0
		BLM	4	20735.8			PICH	7390.6	4554.6	4554.6		PICH	3296.4			3296.4	0
		PICH	5	5915.8			PICH	6442.3	3606.3	3606.3		PICH	2068.7			2068.7	643.1
		BLM	6	23799			PICH	5672.9	2836.9	2836.9		PICH
		PICH	7	7390.6			PICH	6635.3	3799.3	3799.3		PICH	1338.2			1338.2	0
		BLM	8	24230.3			PICH	5293.7	2457.7	2457.7		PICH	1790.8			1790.8	0
		PICH	9	6442.3			PICH	4441.5	1605.5	1605.5		PICH	1333.5			1333.5	0
		BLM	10	23354.8			BLM	22138				PICH	2181			2181	719.7
		PICH	11	5672.9			BLM	20735.8	-1402.2	0		PICH	2327.8			2327.8	75.3
		BLM	12	23744.1			BLM	23799	1661	1661		PICH	2184.8			2184.8	0
		PICH	13	6635.3			BLM	24230.3	2092.3	2092.3		PICH	1510.3			1510.3	285.2
		BLM	14	23614.7			BLM	23354.8	1216.8	1216.8		PICH	2777.3			2777.3	0
		PICH	15	5293.7			BLM	23744.1	1606.1	1606.1		PICH	1366.3			1366.3	0
		BLM	16	19433.6			BLM	23614.7	1476.7	1476.7		PICH
		PICH	17	4441.5			BLM	19433.6	-2704.4	0		PICH	2165.9			2165.9	504.5
		BLM	18	21104.5			BLM	21104.5	-1033.5	0		PICH	2318.8			2318.8	1197.6
												PICH	2317.7			2317.7	798.9
	deltaBLM + GFP-BLM-delta13_ICRF_GFP-PICH-CEN-76 early ana.czi											PICH	3438.5			3438.5	459.3
		PICH	1	2929.7			PICH	2929.7				PICH	3325.6			3325.6	125.6
		BLM	2	13594.9			PICH	5489.8	2560.1	2560.1		PICH	4153			4153	723.7
		PICH	3	5489.8			PICH	5634	2704.3	2704.3		PICH	2961			2961	1331.5
		BLM	4	11885.8			PICH	7246.4	4316.7	4316.7		PICH
		PICH	5	5634			PICH	5984.4	3054.7	3054.7		PICH	3116.8			3116.8	151
		BLM	6	13127.5			PICH	5717.6	2787.9	2787.9		PICH	2144.6			2144.6	0
		PICH	7	7246.4			PICH	4716.6	1786.9	1786.9		PICH
		BLM	8	13925.5			PICH	8187.2	5257.5	5257.5		PICH	1925.3			1925.3	0
		PICH	9	5984.4			BLM	13594.9				PICH	1934.3			1934.3	96.4
		BLM	10	13087.1			BLM	11885.8	-1709.1	0		PICH	2949.8			2949.8	577.9
		PICH	11	5717.6			BLM	13127.5	-467.4	0		PICH	3141.2			3141.2	777.6
		BLM	12	13529.7			BLM	13925.5	330.6	330.6		PICH	2468.8			2468.8	1092.4
		PICH	13	4716.6			BLM	13087.1	-507.8	0		PICH	5671.7			5671.7	745.5
		BLM	14	12279.7			BLM	13529.7	-65.2	0		PICH	2663.9			2663.9	0
		PICH	15	8187.2			BLM	12279.7	-1315.2	0		PICH
		BLM	16	14568.8			BLM	14568.8	973.9	973.9		PICH	1149.5			1149.5	0
												PICH	3366.7			3366.7	0
	deltaBLM + GFP-BLM-delta13_ICRF_GFP-PICH-CEN-75 ana-like.czi											PICH	1881.6			1881.6	2181.2
		PICH	1	2781.2			PICH	2781.2				PICH	1605.7			1605.7	0
		BLM	2	8728.8			PICH	4367.1	1585.9	1585.9		PICH	2287.9			2287.9	1080.8
		PICH	3	4367.1			PICH	4863.7	2082.5	2082.5		PICH	2014.8			2014.8	0
		BLM	4	9147.9			PICH	4248.5	1467.3	1467.3		PICH	2244.3			2244.3	0
		PICH	5	4863.7			PICH	4920.3	2139.1	2139.1		PICH
		BLM	6	8706.2			PICH	3828.7	1047.5	1047.5		PICH	1366.4			1366.4	0
		PICH	7	4248.5			PICH	3969.7	1188.5	1188.5		PICH	2920.7			2920.7	0
		BLM	8	8906.3			BLM	8728.8				PICH	2148.6			2148.6	0
		PICH	9	4920.3			BLM	9147.9	419.1	419.1		PICH	3220.4			3220.4	0
		BLM	10	8215.9			BLM	8706.2	-22.6	0		PICH	3210.9			3210.9	1081.4
		PICH	11	3828.7			BLM	8906.3	177.5	177.5		PICH	2271.1			2271.1	1249.7
		BLM	12	8045			BLM	8215.9	-512.9	0		PICH	3434.1			3434.1	0
		PICH	13	3969.7			BLM	8045	-683.8	0		PICH	1698.4			1698.4	0
		BLM	14	8493.8			BLM	8493.8	-235	0		PICH	1903.4			1903.4	1303.2
												PICH
	deltaBLM + GFP-BLM-delta13_ICRF_GFP-PICH-CEN-74 meta-like.czi											PICH	4659.8			4659.8	1633.2
		PICH	1	2885.5			PICH	2885.5				PICH	3010.3			3010.3	1151.2
		BLM	2	7857.5			PICH	4656.8	1771.3	1771.3		PICH	1382			1382	0
		PICH	3	4656.8			PICH	5264.6	2379.1	2379.1		PICH	2533.4			2533.4	628.2
		BLM	4	6698			PICH	6356.8	3471.3	3471.3		PICH	3407.3			3407.3	823.9
		PICH	5	5264.6			PICH	5237	2351.5	2351.5		PICH	3291			3291	952.5
		BLM	6	6935			PICH	5764.4	2878.9	2878.9		PICH	3453.2			3453.2	592.9
		PICH	7	6356.8			PICH	4429.1	1543.6	1543.6		PICH
		BLM	8	7691.7			PICH	6197.4	3311.9	3311.9		PICH	2271.4			2271.4	791.7
		PICH	9	5237			PICH	5188.4	2302.9	2302.9		PICH	1923.9			1923.9	1275.3
		BLM	10	8192.8			PICH	6181.9	3296.4	3296.4		PICH	1980.7			1980.7	0
		PICH	11	5764.4			PICH	4954.2	2068.7	2068.7		PICH	1421.6			1421.6	0
		BLM	12	7640.4			BLM	7857.5				PICH	2082			2082	0
		PICH	13	4429.1			BLM	6698	-1159.5	0		PICH	1949			1949	1091.8
		BLM	14	8272			BLM	6935	-922.5	0		PICH
		PICH	15	6197.4			BLM	7691.7	-165.8	0		PICH	1524			1524	61.6
		BLM	16	8483.7			BLM	8192.8	335.3	335.3		PICH	1442.5			1442.5	566.6
		PICH	17	5188.4			BLM	7640.4	-217.1	0		PICH	2692.9			2692.9	850.8
		BLM	18	7179.8			BLM	8272	414.5	414.5		PICH	2229.5			2229.5	1030.5
		PICH	19	6181.9			BLM	8483.7	626.2	626.2		PICH	1441.8			1441.8	81.1
		BLM	20	7781.9			BLM	7179.8	-677.7	0		PICH	2002.3			2002.3	361.2
		PICH	21	4954.2			BLM	7781.9	-75.6	0		PICH	2094.6			2094.6	461.4
		BLM	22	8500.6			BLM	8500.6	643.1	643.1		PICH
												PICH	2095.3			2095.3	0
	deltaBLM + GFP-BLM-delta13_ICRF_GFP-PICH-CEN-73 early ana.czi											PICH	2145.8			2145.8	0
		PICH	1	2041.9			PICH	2041.9				PICH	1551.7			1551.7	317
		BLM	2	16602			PICH	3380.1	1338.2	1338.2		PICH	1431.7			1431.7	183.5
		PICH	3	3380.1			PICH	3832.7	1790.8	1790.8		PICH	1497.5			1497.5	0
		BLM	4	15291.5			PICH	3375.4	1333.5	1333.5		PICH	2408.1			2408.1	0
		PICH	5	3832.7			PICH	4222.9	2181	2181		PICH	1887			1887	0
		BLM	6	16580.7			PICH	4369.7	2327.8	2327.8		PICH	1981.2			1981.2	0
		PICH	7	3375.4			PICH	4226.7	2184.8	2184.8		PICH
		BLM	8	16409.5			PICH	3552.2	1510.3	1510.3		PICH	3292.8			3292.8	375.5
		PICH	9	4222.9			PICH	4819.2	2777.3	2777.3		PICH	3482.6			3482.6	564
		BLM	10	17321.7			PICH	3408.2	1366.3	1366.3		PICH	3019.7			3019.7	487.8
		PICH	11	4369.7			BLM	16602				PICH	3648.7			3648.7	485.6
		BLM	12	16677.3			BLM	15291.5	-1310.5	0		PICH	2723.5			2723.5	645.6
		PICH	13	4226.7			BLM	16580.7	-21.3	0		PICH	2103.6			2103.6	79.1
		BLM	14	15670.1			BLM	16409.5	-192.5	0		PICH	3020.7			3020.7	0
		PICH	15	3552.2			BLM	17321.7	719.7	719.7		PICH	2496.4			2496.4	0
		BLM	16	16887.2			BLM	16677.3	75.3	75.3		PICH	907			907	0
		PICH	17	4819.2			BLM	15670.1	-931.9	0		PICH	3441.6			3441.6	386.9
		BLM	18	15102.4			BLM	16887.2	285.2	285.2		PICH
		PICH	19	3408.2			BLM	15102.4	-1499.6	0		PICH	2241.4			2241.4	557.5
		BLM	20	14898.5			BLM	14898.5	-1703.5	0		PICH	1708			1708	339.8
												PICH	1940.3			1940.3	297.3
	deltaBLM + GFP-BLM-delta13_ICRF_GFP-PICH-CEN-72 ana-like.czi											PICH	457.6			457.6	0
		PICH	1	1941			PICH	1941				PICH
		BLM	2	5272.3			PICH	4106.9	2165.9	2165.9		PICH	1900			1900	0
		PICH	3	4106.9			PICH	4259.8	2318.8	2318.8		PICH	1922.3			1922.3	0
		BLM	4	5776.8			PICH	4258.7	2317.7	2317.7		PICH	398.8			398.8	0
		PICH	5	4259.8			PICH	5379.5	3438.5	3438.5		PICH	1980.4			1980.4	0
		BLM	6	6469.9			PICH	5266.6	3325.6	3325.6		PICH	1334.9			1334.9	0
		PICH	7	4258.7			PICH	6094	4153	4153		PICH	1898.4			1898.4	0
		BLM	8	6071.2			PICH	4902	2961	2961		PICH
		PICH	9	5379.5			BLM	5272.3				PICH	1493.9			1493.9	0
		BLM	10	5731.6			BLM	5776.8	504.5	504.5		PICH	898.7			898.7	0
		PICH	11	5266.6			BLM	6469.9	1197.6	1197.6		PICH	1775.4			1775.4	0
		BLM	12	5397.9			BLM	6071.2	798.9	798.9		PICH	943.2			943.2	0
		PICH	13	6094			BLM	5731.6	459.3	459.3		PICH
		BLM	14	5996			BLM	5397.9	125.6	125.6		PICH	4114			4114	852.5
		PICH	15	4902			BLM	5996	723.7	723.7		PICH	2010.1			2010.1	87.5
		BLM	16	6603.8			BLM	6603.8	1331.5	1331.5		PICH	3544.6			3544.6	595.7
												PICH	3657.2			3657.2	956.1
	deltaBLM + GFP-BLM-delta13_ICRF_GFP-PICH-CEN-70 mid ana.czi											PICH	2347.9			2347.9	520.8
		PICH	1	2989.2			PICH	2989.2				PICH	3510.3			3510.3	705.9
		BLM	2	14034.7			PICH	6106	3116.8	3116.8		PICH	3058.2			3058.2	358.9
		PICH	3	6106			PICH	5133.8	2144.6	2144.6		PICH
		BLM	4	14185.7			BLM	14034.7				PICH	5877.6			5877.6	254.9
		PICH	5	5133.8			BLM	14185.7	151	151		PICH	3345			3345	0
		BLM	6	12826.4			BLM	12826.4	-1208.3	0		PICH	3410.2			3410.2	0
												PICH	3661.6			3661.6	0
	deltaBLM + GFP-BLM-delta13_ICRF_GFP-PICH-CEN-69 early ana.czi											PICH	2937.6			2937.6	0
		PICH	1	2809.9			PICH	2809.9				PICH	3403			3403	1150.7
		BLM	2	7153.4			PICH	4735.2	1925.3	1925.3		PICH	2741.5			2741.5	1290.1
		PICH	3	4735.2			PICH	4744.2	1934.3	1934.3		PICH	3780			3780	0
		BLM	4	6905.7			PICH	5759.7	2949.8	2949.8		PICH	2709.8			2709.8	0
		PICH	5	4744.2			PICH	5951.1	3141.2	3141.2		PICH	4706.7			4706.7	698.6
		BLM	6	7249.8			PICH	5278.7	2468.8	2468.8		PICH
		PICH	7	5759.7			PICH	8481.6	5671.7	5671.7		PICH	1454.2			1454.2	0
		BLM	8	7731.3			PICH	5473.8	2663.9	2663.9		PICH	1954.1			1954.1	0
		PICH	9	5951.1			BLM	7153.4				PICH	2648.9			2648.9	24.4
		BLM	10	7931			BLM	6905.7	-247.7	0		PICH	2619.6			2619.6	0
		PICH	11	5278.7			BLM	7249.8	96.4	96.4		PICH	2149.8			2149.8	0
		BLM	12	8245.8			BLM	7731.3	577.9	577.9		PICH	2428.7			2428.7	1497.2
		PICH	13	8481.6			BLM	7931	777.6	777.6		PICH	2308.4			2308.4	0
		BLM	14	7898.9			BLM	8245.8	1092.4	1092.4		PICH
		PICH	15	5473.8			BLM	7898.9	745.5	745.5		PICH	5122.4			5122.4	853.2
		BLM	16	6858.4			BLM	6858.4	-295	0		PICH	3601.1			3601.1	564.7
												PICH	2434.1			2434.1	471.3
	deltaBLM + GFP-BLM-delta13_ICRF_GFP-PICH-CEN-68 ana-like.czi											PICH	3501.3			3501.3	399.2
		PICH	1	1869.5			PICH	1869.5				PICH	4586.6			4586.6	258.6
		BLM	2	9493.7			PICH	3019	1149.5	1149.5		PICH	4088.8			4088.8	504.5
		PICH	3	3019			PICH	5236.2	3366.7	3366.7		PICH	8676			8676	1838.1
		BLM	4	8877.9			PICH	3751.1	1881.6	1881.6		PICH
		PICH	5	5236.2			PICH	3475.2	1605.7	1605.7		PICH	1477.2			1477.2	0
		BLM	6	9075.9			PICH	4157.4	2287.9	2287.9		PICH	2124.2			2124.2	230.4
		PICH	7	3751.1			PICH	3884.3	2014.8	2014.8		PICH	2117.4			2117.4	0
		BLM	8	11674.9			PICH	4113.8	2244.3	2244.3		PICH	1604.2			1604.2	666.4
		PICH	9	3475.2			BLM	9493.7				PICH
		BLM	10	9396.1			BLM	8877.9	-615.8	0		PICH	2682.2			2682.2	252.8
		PICH	11	4157.4			BLM	9075.9	-417.8	0		PICH	3213.6			3213.6	0
		BLM	12	10574.5			BLM	11674.9	2181.2	2181.2		PICH	2296.2			2296.2	0
		PICH	13	3884.3			BLM	9396.1	-97.6	0		PICH	2502.9			2502.9	594.9
		BLM	14	7225.3			BLM	10574.5	1080.8	1080.8		PICH
		PICH	15	4113.8			BLM	7225.3	-2268.4	0		PICH	2144.9			2144.9	1606.1
		BLM	16	8414.9			BLM	8414.9	-1078.8	0		PICH	2082.8			2082.8	1475.9
												PICH
	deltaBLM + GFP-BLM-delta13_ICRF_GFP-PICH-CEN-67 meta-like.czi											PICH	1703.3			1703.3	0
		PICH	1	1624.8			PICH	1624.8				PICH	1701			1701	281.1
		BLM	2	10686.3			PICH	2991.2	1366.4	1366.4		PICH	2570.3			2570.3	0
		PICH	3	2991.2			PICH	4545.5	2920.7	2920.7		PICH	2768.4			2768.4	86.8
		BLM	4	8553.8			PICH	3773.4	2148.6	2148.6		PICH
		PICH	5	4545.5			PICH	4845.2	3220.4	3220.4		PICH	1340.9			1340.9	71.6
		BLM	6	9584.8			PICH	4835.7	3210.9	3210.9		PICH	1462.5			1462.5	0
		PICH	7	3773.4			PICH	3895.9	2271.1	2271.1		PICH	1458.2			1458.2	0
		BLM	8	9601.4			PICH	5058.9	3434.1	3434.1		PICH	1407.7			1407.7	0
		PICH	9	4845.2			PICH	3323.2	1698.4	1698.4		PICH	937			937	0
		BLM	10	9389.2			PICH	3528.2	1903.4	1903.4		PICH	1634.3			1634.3	0
		PICH	11	4835.7			BLM	10686.3				PICH	2646.3			2646.3	0
		BLM	12	11767.7			BLM	8553.8	-2132.5	0		PICH
		PICH	13	3895.9			BLM	9584.8	-1101.5	0		PICH	1647.7			1647.7	0
		BLM	14	11936			BLM	9601.4	-1084.9	0		PICH	1711.9			1711.9	0
		PICH	15	5058.9			BLM	9389.2	-1297.1	0		PICH	1794.5			1794.5	0
		BLM	16	9529.7			BLM	11767.7	1081.4	1081.4		PICH	1629.3			1629.3	0
		PICH	17	3323.2			BLM	11936	1249.7	1249.7		PICH	1381.7			1381.7	0
		BLM	18	9715.4			BLM	9529.7	-1156.6	0		PICH	1994.1			1994.1	260.7
		PICH	19	3528.2			BLM	9715.4	-970.9	0		PICH
		BLM	20	11989.5			BLM	11989.5	1303.2	1303.2		PICH	2517.1			2517.1	235.4
												PICH	1054			1054	26.8
	deltaBLM + GFP-BLM-delta13_ICRF_GFP-PICH-CEN-66 ana-like.czi											PICH	2040.1			2040.1	322.6
		PICH	1	1988.4			PICH	1988.4				PICH	2397.9			2397.9	525.2
		BLM	2	10270			PICH	6648.2	4659.8	4659.8		PICH	2156.3			2156.3	686.2
		PICH	3	6648.2			PICH	4998.7	3010.3	3010.3		PICH	3209.3			3209.3	0
		BLM	4	11903.2			PICH	3370.4	1382	1382		PICH	2353			2353	738.7
		PICH	5	4998.7			PICH	4521.8	2533.4	2533.4		PICH
		BLM	6	11421.2			PICH	5395.7	3407.3	3407.3		PICH	4182.3			4182.3	71.6
		PICH	7	3370.4			PICH	5279.4	3291	3291		PICH	4404.6			4404.6	337.9
		BLM	8	9990.2			PICH	5441.6	3453.2	3453.2		PICH	4102			4102	48.7
		PICH	9	4521.8			BLM	10270				PICH	7206.2			7206.2	332.7
		BLM	10	10898.2			BLM	11903.2	1633.2	1633.2		PICH	2984.7			2984.7	0
		PICH	11	5395.7			BLM	11421.2	1151.2	1151.2		PICH	3174.2			3174.2	240.9
		BLM	12	11093.9			BLM	9990.2	-279.8	0		PICH					0
		PICH	13	5279.4			BLM	10898.2	628.2	628.2		PICH	2306.1			2306.1	344.7
		BLM	14	11222.5			BLM	11093.9	823.9	823.9		PICH	2755.8			2755.8	822.8
		PICH	15	5441.6			BLM	11222.5	952.5	952.5		PICH	2295.9			2295.9	0
		BLM	16	10862.9			BLM	10862.9	592.9	592.9		PICH
												PICH	3752.8			3752.8	116.8
	deltaBLM + GFP-BLM-delta13_ICRF_GFP-PICH-CEN-64 meta-like.czi											PICH	3620.2			3620.2	70.3
		PICH	1	1651.3			PICH	1651.3				PICH	4667.3			4667.3	1137.1
		BLM	2	8268.3			PICH	3922.7	2271.4	2271.4		PICH	2844.7			2844.7	0
		PICH	3	3922.7			PICH	3575.2	1923.9	1923.9		PICH	3567.7			3567.7	1141.9
		BLM	4	9060			PICH	3632	1980.7	1980.7		PICH	3590.8			3590.8	889
		PICH	5	3575.2			PICH	3072.9	1421.6	1421.6		PICH	5277.3			5277.3	980
		BLM	6	9543.6			PICH	3733.3	2082	2082		PICH	4387.8			4387.8	1066.1
		PICH	7	3632			PICH	3600.3	1949	1949		PICH	3677.6			3677.6	0
		BLM	8	6575.4			BLM	8268.3				PICH	2743.9			2743.9	397.7
		PICH	9	3072.9			BLM	9060	791.7	791.7		PICH	2767.8			2767.8	40.8
		BLM	10	6302.5			BLM	9543.6	1275.3	1275.3		PICH	3329.5			3329.5	0
		PICH	11	3733.3			BLM	6575.4	-1692.9	0		PICH	591.2			591.2	0
		BLM	12	6482.9			BLM	6302.5	-1965.8	0		PICH	3523.2			3523.2	649.6
		PICH	13	3600.3			BLM	6482.9	-1785.4	0		PICH
		BLM	14	9360.1			BLM	9360.1	1091.8	1091.8		PICH	2180			2180	296.7
												PICH	1545.4			1545.4	155.6
	deltaBLM + GFP-BLM-delta13_ICRF_GFP-PICH-CEN-62 early ana.czi											PICH
		PICH	1	2051.4			PICH	2051.4				PICH	7386.1			7386.1	807
		BLM	2	6552.4			PICH	3575.4	1524	1524		PICH	7264.5			7264.5	672.3
		PICH	3	3575.4			PICH	3493.9	1442.5	1442.5		PICH	6673.7			6673.7	588.6
		BLM	4	6614			PICH	4744.3	2692.9	2692.9		PICH	6716.6			6716.6	0
		PICH	5	3493.9			PICH	4280.9	2229.5	2229.5		PICH	6668.1			6668.1	0
		BLM	6	7119			PICH	3493.2	1441.8	1441.8		PICH	5585.6			5585.6	0
		PICH	7	4744.3			PICH	4053.7	2002.3	2002.3		PICH	3874.3			3874.3	0
		BLM	8	7403.2			PICH	4146	2094.6	2094.6		PICH	4041.4			4041.4	8.2
		PICH	9	4280.9			BLM	6552.4				PICH	6945.5			6945.5	637.4
		BLM	10	7582.9			BLM	6614	61.6	61.6		PICH	5373.8			5373.8	21
		PICH	11	3493.2			BLM	7119	566.6	566.6		PICH	7029.4			7029.4	598.6
		BLM	12	6633.5			BLM	7403.2	850.8	850.8		PICH
		PICH	13	4053.7			BLM	7582.9	1030.5	1030.5		PICH	3063.1			3063.1	0.5
		BLM	14	6913.6			BLM	6633.5	81.1	81.1		PICH	1105.7			1105.7	0
		PICH	15	4146			BLM	6913.6	361.2	361.2		PICH	3274.6			3274.6	1031.8
		BLM	16	7013.8			BLM	7013.8	461.4	461.4		PICH	3772.4			3772.4	0
												PICH	3298.3			3298.3	0
	deltaBLM + GFP-BLM-delta13_ICRF_GFP-PICH-CEN-61 early ana.czi											PICH	2351			2351	0
		PICH	1	1673.1			PICH	1673.1				PICH	2907			2907	9.6
		BLM	2	12891.6			PICH	3768.4	2095.3	2095.3		PICH	1605.9			1605.9	0
		PICH	3	3768.4			PICH	3818.9	2145.8	2145.8		PICH	2681.7			2681.7	0
		BLM	4	11240.7			PICH	3224.8	1551.7	1551.7		PICH
		PICH	5	3818.9			PICH	3104.8	1431.7	1431.7		PICH	4143.5			4143.5	834.6
		BLM	6	10792.3			PICH	3170.6	1497.5	1497.5		PICH	3284.1			3284.1	52.8
		PICH	7	3224.8			PICH	4081.2	2408.1	2408.1		PICH	3427.2			3427.2	727.2
		BLM	8	13208.6			PICH	3560.1	1887	1887		PICH	3942.3			3942.3	1413.1
		PICH	9	3104.8			PICH	3654.3	1981.2	1981.2		PICH
		BLM	10	13075.1			BLM	12891.6				PICH	1376.2			1376.2	1138.8
		PICH	11	3170.6			BLM	11240.7	-1650.9	0		PICH
		BLM	12	12450.4			BLM	10792.3	-2099.3	0		PICH	1164.7			1164.7	1192.2
		PICH	13	4081.2			BLM	13208.6	317	317		PICH	1480.4			1480.4	977.2
		BLM	14	12794.1			BLM	13075.1	183.5	183.5		PICH	1538.9			1538.9	1541.9
		PICH	15	3560.1			BLM	12450.4	-441.2	0		PICH	885			885	0
		BLM	16	12125.4			BLM	12794.1	-97.5	0		PICH	1882.2			1882.2	0
		PICH	17	3654.3			BLM	12125.4	-766.2	0		PICH	2643.4			2643.4	0
		BLM	18	11505			BLM	11505	-1386.6	0		PICH	1032.2			1032.2	0
												PICH
	deltaBLM + GFP-BLM-delta13_ICRF_GFP-PICH-CEN-58 metaphase-like.czi											PICH	2546.7			2546.7	0
		PICH	1	2340			PICH	2340				PICH	1714.6			1714.6	0
		BLM	2	5594.4			PICH	5632.8	3292.8	3292.8		PICH	1943.3			1943.3	452.4
		PICH	3	5632.8			PICH	5822.6	3482.6	3482.6		PICH	2848.1			2848.1	0
		BLM	4	5969.9			PICH	5359.7	3019.7	3019.7		PICH	3696			3696	9.8
		PICH	5	5822.6			PICH	5988.7	3648.7	3648.7		PICH
		BLM	6	6158.4			PICH	5063.5	2723.5	2723.5		PICH	1936.6			1936.6	0
		PICH	7	5359.7			PICH	4443.6	2103.6	2103.6		PICH	2078			2078	0
		BLM	8	6082.2			PICH	5360.7	3020.7	3020.7		PICH	1304.4			1304.4	0
		PICH	9	5988.7			PICH	4836.4	2496.4	2496.4		PICH	3329.8			3329.8	629.6
		BLM	10	6080			PICH	3247	907	907		PICH	3638.5			3638.5	570.6
		PICH	11	5063.5			PICH	5781.6	3441.6	3441.6		PICH	4232.7			4232.7	99.1
		BLM	12	6240			BLM	5594.4				PICH	2133.3			2133.3	0
		PICH	13	4443.6			BLM	5969.9	375.5	375.5		PICH	3412.8			3412.8	719.2
		BLM	14	5673.5			BLM	6158.4	564	564		PICH	3189.6			3189.6	0
		PICH	15	5360.7			BLM	6082.2	487.8	487.8		PICH	2339.8			2339.8	397.2
		BLM	16	5540.7			BLM	6080	485.6	485.6		PICH	2895.2			2895.2	0
		PICH	17	4836.4			BLM	6240	645.6	645.6		PICH	4448.9			4448.9	614.5
		BLM	18	5346.2			BLM	5673.5	79.1	79.1		PICH	2632.4			2632.4	0
		PICH	19	3247			BLM	5540.7	-53.7	0		PICH
		BLM	20	5239.9			BLM	5346.2	-248.2	0		PICH	910			910	0
		PICH	21	5781.6			BLM	5239.9	-354.5	0		PICH	892.2			892.2	0
		BLM	22	5981.3			BLM	5981.3	386.9	386.9		PICH	1234			1234	7
												PICH	2004.7			2004.7	0
	deltaBLM + GFP-BLM-delta13_ICRF_GFP-PICH-CEN-57 ana-like.czi											PICH	1132.1			1132.1	0
		PICH	1	2484.8			PICH	2484.8				PICH	2374.5			2374.5	119.2
		BLM	2	8308.7			PICH	4726.2	2241.4	2241.4		PICH	935.4			935.4	641.8
		PICH	3	4726.2			PICH	4192.8	1708	1708		PICH	1027.8			1027.8	254.5
		BLM	4	8866.2			PICH	4425.1	1940.3	1940.3		PICH	4156.4			4156.4	732.2
		PICH	5	4192.8			PICH	2942.4	457.6	457.6		PICH
		BLM	6	8648.5			BLM	8308.7				PICH	1503.7			1503.7	0
		PICH	7	4425.1			BLM	8866.2	557.5	557.5		PICH	962.8			962.8	0
		BLM	8	8606			BLM	8648.5	339.8	339.8		PICH	2497			2497	0
		PICH	9	2942.4			BLM	8606	297.3	297.3		PICH	3005.4			3005.4	0
		BLM	10	7376.7			BLM	7376.7	-932	0		PICH	1865.8			1865.8	0
												PICH	1804.2			1804.2	0
	deltaBLM + GFP-BLM-delta13_ICRF_GFP-PICH-CEN-56 early ana.czi											PICH	2406.6			2406.6	323.7
		PICH	1	3507.8			PICH	3507.8				PICH	2265.1			2265.1	240.3
		BLM	2	25205.9			PICH	5407.8	1900	1900		PICH	2546.7			2546.7	535.2
		PICH	3	5407.8			PICH	5430.1	1922.3	1922.3		PICH	2539			2539	677.9
		BLM	4	24953.3			PICH	3906.6	398.8	398.8		PICH	910.4			910.4	0
		PICH	5	5430.1			PICH	5488.2	1980.4	1980.4		PICH	1122.9			1122.9	0
		BLM	6	24630.1			PICH	4842.7	1334.9	1334.9		PICH	2862.6			2862.6	0
		PICH	7	3906.6			PICH	5406.2	1898.4	1898.4		PICH
		BLM	8	22008.2			BLM	25205.9				PICH	2006.6			2006.6	1105
		PICH	9	5488.2			BLM	24953.3	-252.6	0		BLM
		BLM	10	24396.1			BLM	24630.1	-575.8	0		BLM	0
		PICH	11	4842.7			BLM	22008.2	-3197.7	0		BLM	439.4
		BLM	12	24212.2			BLM	24396.1	-809.8	0		BLM	1812.5
		PICH	13	5406.2			BLM	24212.2	-993.7	0		BLM	523.7
		BLM	14	24484.2			BLM	24484.2	-721.7	0		BLM	0
												BLM	415.2
	deltaBLM + GFP-BLM-delta13_ICRF_GFP-PICH-CEN-55 late ana.czi											BLM	0
		PICH	1	2824.8			PICH	2824.8				BLM	489.8
		BLM	2	23049.7			PICH	4318.7	1493.9	1493.9		BLM	0
		PICH	3	4318.7			PICH	3723.5	898.7	898.7		BLM
		BLM	4	22542.5			PICH	4600.2	1775.4	1775.4		BLM	0
		PICH	5	3723.5			PICH	3768	943.2	943.2		BLM	0
		BLM	6	22717.8			BLM	23049.7				BLM	1955.8
		PICH	7	4600.2			BLM	22542.5	-507.2	0		BLM	995.7
		BLM	8	19273.1			BLM	22717.8	-331.9	0		BLM	1835
		PICH	9	3768			BLM	19273.1	-3776.6	0		BLM	0
		BLM	10	21926			BLM	21926	-1123.7	0		BLM	1132.3
												BLM	0
	deltaBLM + GFP-BLM-delta13_ICRF_GFP-PICH-CEN-51 mid ana.czi											BLM	0
		PICH	1	2236.4			PICH	2236.4				BLM	0
		BLM	2	3753.8			PICH	6350.4	4114	4114		BLM	3380.7
		PICH	3	6350.4			PICH	4246.5	2010.1	2010.1		BLM
		BLM	4	4606.3			PICH	5781	3544.6	3544.6		BLM	0
		PICH	5	4246.5			PICH	5893.6	3657.2	3657.2		BLM	1661
		BLM	6	3841.3			PICH	4584.3	2347.9	2347.9		BLM	2092.3
		PICH	7	5781			PICH	5746.7	3510.3	3510.3		BLM	1216.8
		BLM	8	4349.5			PICH	5294.6	3058.2	3058.2		BLM	1606.1
		PICH	9	5893.6			BLM	3753.8				BLM	1476.7
		BLM	10	4709.9			BLM	4606.3	852.5	852.5		BLM	0
		PICH	11	4584.3			BLM	3841.3	87.5	87.5		BLM	0
		BLM	12	4274.6			BLM	4349.5	595.7	595.7		BLM
		PICH	13	5746.7			BLM	4709.9	956.1	956.1		BLM	0
		BLM	14	4459.7			BLM	4274.6	520.8	520.8		BLM	0
		PICH	15	5294.6			BLM	4459.7	705.9	705.9		BLM	330.6
		BLM	16	4112.7			BLM	4112.7	358.9	358.9		BLM	0
												BLM	0
	deltaBLM + GFP-BLM-delta13_ICRF_GFP-PICH-CEN-50 ana-like.czi											BLM	0
		PICH	1	2480.1			PICH	2480.1				BLM	973.9
		BLM	2	10380.1			PICH	8357.7	5877.6	5877.6		BLM
		PICH	3	8357.7			PICH	5825.1	3345	3345		BLM	419.1
		BLM	4	10635			PICH	5890.3	3410.2	3410.2		BLM	0
		PICH	5	5825.1			PICH	6141.7	3661.6	3661.6		BLM	177.5
		BLM	6	10125.8			PICH	5417.7	2937.6	2937.6		BLM	0
		PICH	7	5890.3			PICH	5883.1	3403	3403		BLM	0
		BLM	8	9907.3			PICH	5221.6	2741.5	2741.5		BLM	0
		PICH	9	6141.7			PICH	6260.1	3780	3780		BLM
		BLM	10	9629.8			PICH	5189.9	2709.8	2709.8		BLM	0
		PICH	11	5417.7			PICH	7186.8	4706.7	4706.7		BLM	0
		BLM	12	9344.3			BLM	10380.1				BLM	0
		PICH	13	5883.1			BLM	10635	254.9	254.9		BLM	335.3
		BLM	14	11530.8			BLM	10125.8	-254.3	0		BLM	0
		PICH	15	5221.6			BLM	9907.3	-472.8	0		BLM	414.5
		BLM	16	11670.2			BLM	9629.8	-750.3	0		BLM	626.2
		PICH	17	6260.1			BLM	9344.3	-1035.8	0		BLM	0
		BLM	18	9735.9			BLM	11530.8	1150.7	1150.7		BLM	0
		PICH	19	5189.9			BLM	11670.2	1290.1	1290.1		BLM	643.1
		BLM	20	9738.9			BLM	9735.9	-644.2	0		BLM
		PICH	21	7186.8			BLM	9738.9	-641.2	0		BLM	0
		BLM	22	11078.7			BLM	11078.7	698.6	698.6		BLM	0
												BLM	0
	deltaBLM + GFP-BLM-delta13_ICRF_GFP-PICH-CEN-47 mid ana.czi											BLM	719.7
		PICH	1	2566.7			PICH	2566.7				BLM	75.3
		BLM	2	15489.2			PICH	4020.9	1454.2	1454.2		BLM	0
		PICH	3	4020.9			PICH	4520.8	1954.1	1954.1		BLM	285.2
		BLM	4	14732			PICH	5215.6	2648.9	2648.9		BLM	0
		PICH	5	4520.8			PICH	5186.3	2619.6	2619.6		BLM	0
		BLM	6	14845.8			PICH	4716.5	2149.8	2149.8		BLM
		PICH	7	5215.6			PICH	4995.4	2428.7	2428.7		BLM	504.5
		BLM	8	15513.6			PICH	4875.1	2308.4	2308.4		BLM	1197.6
		PICH	9	5186.3			BLM	15489.2				BLM	798.9
		BLM	10	14630.6			BLM	14732	-757.2	0		BLM	459.3
		PICH	11	4716.5			BLM	14845.8	-643.4	0		BLM	125.6
		BLM	12	13933.6			BLM	15513.6	24.4	24.4		BLM	723.7
		PICH	13	4995.4			BLM	14630.6	-858.6	0		BLM	1331.5
		BLM	14	16986.4			BLM	13933.6	-1555.6	0		BLM
		PICH	15	4875.1			BLM	16986.4	1497.2	1497.2		BLM	151
		BLM	16	13763.3			BLM	13763.3	-1725.9	0		BLM	0
												BLM
	deltaBLM + GFP-BLM-delta13_ICRF_GFP-PICH-CEN-45 early ana.czi											BLM	0
		PICH	1	2546.9			PICH	2546.9				BLM	96.4
		BLM	2	9679.2			PICH	7669.3	5122.4	5122.4		BLM	577.9
		PICH	3	7669.3			PICH	6148	3601.1	3601.1		BLM	777.6
		BLM	4	10532.4			PICH	4981	2434.1	2434.1		BLM	1092.4
		PICH	5	6148			PICH	6048.2	3501.3	3501.3		BLM	745.5
		BLM	6	10243.9			PICH	7133.5	4586.6	4586.6		BLM	0
		PICH	7	4981			PICH	6635.7	4088.8	4088.8		BLM
		BLM	8	10150.5			PICH	11222.9	8676	8676		BLM	0
		PICH	9	6048.2			BLM	9679.2				BLM	0
		BLM	10	10078.4			BLM	10532.4	853.2	853.2		BLM	2181.2
		PICH	11	7133.5			BLM	10243.9	564.7	564.7		BLM	0
		BLM	12	9937.8			BLM	10150.5	471.3	471.3		BLM	1080.8
		PICH	13	6635.7			BLM	10078.4	399.2	399.2		BLM	0
		BLM	14	10183.7			BLM	9937.8	258.6	258.6		BLM	0
		PICH	15	11222.9			BLM	10183.7	504.5	504.5		BLM
		BLM	16	11517.3			BLM	11517.3	1838.1	1838.1		BLM	0
												BLM	0
	deltaBLM + GFP-BLM-delta13_ICRF_GFP-PICH-CEN-44 mid ana.czi											BLM	0
		PICH	1	2594.4			PICH	2594.4				BLM	0
		BLM	2	18164.2			PICH	4071.6	1477.2	1477.2		BLM	1081.4
		PICH	3	4071.6			PICH	4718.6	2124.2	2124.2		BLM	1249.7
		BLM	4	16760.4			PICH	4711.8	2117.4	2117.4		BLM	0
		PICH	5	4718.6			PICH	4198.6	1604.2	1604.2		BLM	0
		BLM	6	18394.6			BLM	18164.2				BLM	1303.2
		PICH	7	4711.8			BLM	16760.4	-1403.8	0		BLM
		BLM	8	17805.1			BLM	18394.6	230.4	230.4		BLM	1633.2
		PICH	9	4198.6			BLM	17805.1	-359.1	0		BLM	1151.2
		BLM	10	18830.6			BLM	18830.6	666.4	666.4		BLM	0
												BLM	628.2
	deltaBLM + GFP-BLM-delta13_ICRF_GFP-PICH-CEN-40 mid ana.czi											BLM	823.9
		PICH	1	2640.4			PICH	2640.4				BLM	952.5
		BLM	2	8270.8			PICH	5322.6	2682.2	2682.2		BLM	592.9
		PICH	3	5322.6			PICH	5854	3213.6	3213.6		BLM
		BLM	4	8523.6			PICH	4936.6	2296.2	2296.2		BLM	791.7
		PICH	5	5854			PICH	5143.3	2502.9	2502.9		BLM	1275.3
		BLM	6	8215.1			BLM	8270.8				BLM	0
		PICH	7	4936.6			BLM	8523.6	252.8	252.8		BLM	0
		BLM	8	7755.1			BLM	8215.1	-55.7	0		BLM	0
		PICH	9	5143.3			BLM	7755.1	-515.7	0		BLM	1091.8
		BLM	10	8865.7			BLM	8865.7	594.9	594.9		BLM
												BLM	61.6
	deltaBLM + GFP-BLM-delta13_ICRF_GFP-PICH-CEN-39 mid ana.czi											BLM	566.6
		PICH	1	2799.4			PICH	2799.4				BLM	850.8
		BLM	2	13123.3			PICH	4944.3	2144.9	2144.9		BLM	1030.5
		PICH	3	4944.3			PICH	4882.2	2082.8	2082.8		BLM	81.1
		BLM	4	14729.4			BLM	13123.3				BLM	361.2
		PICH	5	4882.2			BLM	14729.4	1606.1	1606.1		BLM	461.4
		BLM	6	14599.2			BLM	14599.2	1475.9	1475.9		BLM
												BLM	0
	deltaBLM + GFP-BLM-delta13_ICRF_GFP-PICH-CEN-38 mid ana.czi											BLM	0
		PICH	1	2060.4			PICH	2060.4				BLM	317
		BLM	2	4439.3			PICH	3763.7	1703.3	1703.3		BLM	183.5
		PICH	3	3763.7			PICH	3761.4	1701	1701		BLM	0
		BLM	4	4415			PICH	4630.7	2570.3	2570.3		BLM	0
		PICH	5	3761.4			PICH	4828.8	2768.4	2768.4		BLM	0
		BLM	6	4720.4			BLM	4439.3				BLM	0
		PICH	7	4630.7			BLM	4415	-24.3	0		BLM
		BLM	8	4235.4			BLM	4720.4	281.1	281.1		BLM	375.5
		PICH	9	4828.8			BLM	4235.4	-203.9	0		BLM	564
		BLM	10	4526.1			BLM	4526.1	86.8	86.8		BLM	487.8
												BLM	485.6
	deltaBLM + GFP-BLM-delta13_ICRF_GFP-PICH-CEN-37 metaphase-like.czi											BLM	645.6
		PICH	1	2016.7			PICH	2016.7				BLM	79.1
		BLM	2	13470.8			PICH	3357.6	1340.9	1340.9		BLM	0
		PICH	3	3357.6			PICH	3479.2	1462.5	1462.5		BLM	0
		BLM	4	13542.4			PICH	3474.9	1458.2	1458.2		BLM	0
		PICH	5	3479.2			PICH	3424.4	1407.7	1407.7		BLM	386.9
		BLM	6	13311.5			PICH	2953.7	937	937		BLM
		PICH	7	3474.9			PICH	3651	1634.3	1634.3		BLM	557.5
		BLM	8	13007.1			PICH	4663	2646.3	2646.3		BLM	339.8
		PICH	9	3424.4			BLM	13470.8				BLM	297.3
		BLM	10	11885.3			BLM	13542.4	71.6	71.6		BLM	0
		PICH	11	2953.7			BLM	13311.5	-159.3	0		BLM
		BLM	12	13052			BLM	13007.1	-463.7	0		BLM	0
		PICH	13	3651			BLM	11885.3	-1585.5	0		BLM	0
		BLM	14	11695.1			BLM	13052	-418.8	0		BLM	0
		PICH	15	4663			BLM	11695.1	-1775.7	0		BLM	0
		BLM	16	11710.6			BLM	11710.6	-1760.2	0		BLM	0
												BLM	0
	deltaBLM + GFP-BLM-delta13_ICRF_GFP-PICH-CEN-37 metaphase-like.czi											BLM
		PICH	1	2143.7			PICH	2143.7				BLM	0
		BLM	2	11391.1			PICH	3791.4	1647.7	1647.7		BLM	0
		PICH	3	3791.4			PICH	3855.6	1711.9	1711.9		BLM	0
		BLM	4	11105.9			PICH	3938.2	1794.5	1794.5		BLM	0
		PICH	5	3855.6			PICH	3773	1629.3	1629.3		BLM
		BLM	6	10640.5			PICH	3525.4	1381.7	1381.7		BLM	852.5
		PICH	7	3938.2			PICH	4137.8	1994.1	1994.1		BLM	87.5
		BLM	8	9402.7			BLM	11391.1				BLM	595.7
		PICH	9	3773			BLM	11105.9	-285.2	0		BLM	956.1
		BLM	10	9832.6			BLM	10640.5	-750.6	0		BLM	520.8
		PICH	11	3525.4			BLM	9402.7	-1988.4	0		BLM	705.9
		BLM	12	10679.3			BLM	9832.6	-1558.5	0		BLM	358.9
		PICH	13	4137.8			BLM	10679.3	-711.8	0		BLM
		BLM	14	11651.8			BLM	11651.8	260.7	260.7		BLM	254.9
												BLM	0
	deltaBLM + GFP-BLM-delta13_ICRF_GFP-PICH-CEN-31 metaphase-like.czi											BLM	0
		PICH	1	1961.3			PICH	1961.3				BLM	0
		BLM	2	6358.4			PICH	4478.4	2517.1	2517.1		BLM	0
		PICH	3	4478.4			PICH	3015.3	1054	1054		BLM	1150.7
		BLM	4	6593.8			PICH	4001.4	2040.1	2040.1		BLM	1290.1
		PICH	5	3015.3			PICH	4359.2	2397.9	2397.9		BLM	0
		BLM	6	6385.2			PICH	4117.6	2156.3	2156.3		BLM	0
		PICH	7	4001.4			PICH	5170.6	3209.3	3209.3		BLM	698.6
		BLM	8	6681			PICH	4314.3	2353	2353		BLM
		PICH	9	4359.2			BLM	6358.4				BLM	0
		BLM	10	6883.6			BLM	6593.8	235.4	235.4		BLM	0
		PICH	11	4117.6			BLM	6385.2	26.8	26.8		BLM	24.4
		BLM	12	7044.6			BLM	6681	322.6	322.6		BLM	0
		PICH	13	5170.6			BLM	6883.6	525.2	525.2		BLM	0
		BLM	14	6123.1			BLM	7044.6	686.2	686.2		BLM	1497.2
		PICH	15	4314.3			BLM	6123.1	-235.3	0		BLM	0
		BLM	16	7097.1			BLM	7097.1	738.7	738.7		BLM
												BLM	853.2
	deltaBLM + GFP-BLM-delta13_ICRF_GFP-PICH-CEN-28 ana-like.czi											BLM	564.7
		PICH	1	2509.9			PICH	2509.9				BLM	471.3
		BLM	2	4146			PICH	6692.2	4182.3	4182.3		BLM	399.2
		PICH	3	6692.2			PICH	6914.5	4404.6	4404.6		BLM	258.6
		BLM	4	4217.6			PICH	6611.9	4102	4102		BLM	504.5
		PICH	5	6914.5			PICH	9716.1	7206.2	7206.2		BLM	1838.1
		BLM	6	4483.9			PICH	5494.6	2984.7	2984.7		BLM
		PICH	7	6611.9			PICH	5684.1	3174.2	3174.2		BLM	0
		BLM	8	4194.7			BLM	4146				BLM	230.4
		PICH	9	9716.1			BLM	4217.6	71.6	71.6		BLM	0
		BLM	10	4478.7			BLM	4483.9	337.9	337.9		BLM	666.4
		PICH	11	5494.6			BLM	4194.7	48.7	48.7		BLM
		BLM	12	4144.9			BLM	4478.7	332.7	332.7		BLM	252.8
		PICH	13	5684.1			BLM	4144.9	-1.1	0		BLM	0
		BLM	14	4386.9			BLM	4386.9	240.9	240.9		BLM	0
												BLM	594.9
	deltaBLM + GFP-BLM-delta13_ICRF_GFP-PICH-CEN-27 late ana.czi											BLM
		PICH	1	2840.4			PICH	2840.4				BLM	1606.1
		BLM	2	7244.4			PICH	5146.5	2306.1	2306.1		BLM	1475.9
		PICH	3	5146.5			PICH	5596.2	2755.8	2755.8		BLM
		BLM	4	7589.1			PICH	5136.3	2295.9	2295.9		BLM	0
		PICH	5	5596.2			BLM	7244.4		0		BLM	281.1
		BLM	6	8067.2			BLM	7589.1	344.7	344.7		BLM	0
		PICH	7	5136.3			BLM	8067.2	822.8	822.8		BLM	86.8
		BLM	8	7230.5			BLM	7230.5	-13.9	0		BLM
												BLM	71.6
	deltaBLM + GFP-BLM-delta13_ICRF_GFP-PICH-CEN-23 early ana.czi											BLM	0
		PICH	1	2982.5			PICH	2982.5				BLM	0
		BLM	2	13385.7			PICH	6682.5	3752.8	3752.8		BLM	0
		PICH	3	6682.5			PICH	6549.9	3620.2	3620.2		BLM	0
		BLM	4	13502.5			PICH	7597	4667.3	4667.3		BLM	0
		PICH	5	6549.9			PICH	5774.4	2844.7	2844.7		BLM	0
		BLM	6	13456			PICH	6497.4	3567.7	3567.7		BLM
		PICH	7	7597			PICH	6520.5	3590.8	3590.8		BLM	0
		BLM	8	14522.8			PICH	8207	5277.3	5277.3		BLM	0
		PICH	9	5774.4			PICH	7317.5	4387.8	4387.8		BLM	0
		BLM	10	12346.4			PICH	6607.3	3677.6	3677.6		BLM	0
		PICH	11	6497.4			PICH	5673.6	2743.9	2743.9		BLM	0
		BLM	12	14527.6			PICH	5697.5	2767.8	2767.8		BLM	260.7
		PICH	13	6520.5			PICH	6259.2	3329.5	3329.5		BLM
		BLM	14	14274.7			PICH	3520.9	591.2	591.2		BLM	235.4
		PICH	15	8207			PICH	6452.9	3523.2	3523.2		BLM	26.8
		BLM	16	14365.7			BLM	13385.7				BLM	322.6
		PICH	17	7317.5			BLM	13502.5	116.8	116.8		BLM	525.2
		BLM	18	14451.8			BLM	13456	70.3	70.3		BLM	686.2
		PICH	19	6607.3			BLM	14522.8	1137.1	1137.1		BLM	0
		BLM	20	13140			BLM	12346.4	-1039.3	0		BLM	738.7
		PICH	21	5673.6			BLM	14527.6	1141.9	1141.9		BLM
		BLM	22	13783.4			BLM	14274.7	889	889		BLM	71.6
		PICH	23	5697.5			BLM	14365.7	980	980		BLM	337.9
		BLM	24	13426.5			BLM	14451.8	1066.1	1066.1		BLM	48.7
		PICH	25	6259.2			BLM	13140	-245.7	0		BLM	332.7
		BLM	26	12084.6			BLM	13783.4	397.7	397.7		BLM	0
		PICH	27	3520.9			BLM	13426.5	40.8	40.8		BLM	240.9
		BLM	28	11512.4			BLM	12084.6	-1301.1	0		BLM	0
		PICH	29	6452.9			BLM	11512.4	-1873.3	0		BLM	344.7
		BLM	30	14035.3			BLM	14035.3	649.6	649.6		BLM	822.8
												BLM	0
	deltaBLM + GFP-BLM-delta13_ICRF_GFP-PICH-CEN-21 mid ana.czi											BLM
		PICH	1	2374.1			PICH	2374.1				BLM	116.8
		BLM	2	26950.4			PICH	4554.1	2180	2180		BLM	70.3
		PICH	3	4554.1			PICH	3919.5	1545.4	1545.4		BLM	1137.1
		BLM	4	27247.1			BLM	26950.4				BLM	0
		PICH	5	3919.5			BLM	27247.1	296.7	296.7		BLM	1141.9
		BLM	6	27106			BLM	27106	155.6	155.6		BLM	889
												BLM	980
	deltaBLM + GFP-BLM-delta13_ICRF_GFP-PICH-CEN-20 early ana.czi											BLM	1066.1
		PICH	1	2992.9			PICH	2992.9				BLM	0
		BLM	2	8085.4			PICH	10379	7386.1	7386.1		BLM	397.7
		PICH	3	10379			PICH	10257.4	7264.5	7264.5		BLM	40.8
		BLM	4	8892.4			PICH	9666.6	6673.7	6673.7		BLM	0
		PICH	5	10257.4			PICH	9709.5	6716.6	6716.6		BLM	0
		BLM	6	8757.7			PICH	9661	6668.1	6668.1		BLM	649.6
		PICH	7	9666.6			PICH	8578.5	5585.6	5585.6		BLM
		BLM	8	8674			PICH	6867.2	3874.3	3874.3		BLM	296.7
		PICH	9	9709.5			PICH	7034.3	4041.4	4041.4		BLM	155.6
		BLM	10	8014.1			PICH	9938.4	6945.5	6945.5		BLM
		PICH	11	9661			PICH	8366.7	5373.8	5373.8		BLM	807
		BLM	12	7945.7			PICH	10022.3	7029.4	7029.4		BLM	672.3
		PICH	13	8578.5			BLM	8085.4				BLM	588.6
		BLM	14	7639.2			BLM	8892.4	807	807		BLM	0
		PICH	15	6867.2			BLM	8757.7	672.3	672.3		BLM	0
		BLM	16	7165			BLM	8674	588.6	588.6		BLM	0
		PICH	17	7034.3			BLM	8014.1	-71.3	0		BLM	0
		BLM	18	8093.6			BLM	7945.7	-139.7	0		BLM	8.2
		PICH	19	9938.4			BLM	7639.2	-446.2	0		BLM	637.4
		BLM	20	8722.8			BLM	7165	-920.4	0		BLM	21
		PICH	21	8366.7			BLM	8093.6	8.2	8.2		BLM	598.6
		BLM	22	8106.4			BLM	8722.8	637.4	637.4		BLM
		PICH	23	10022.3			BLM	8106.4	21	21		BLM	0.5
		BLM	24	8684			BLM	8684	598.6	598.6		BLM	0
												BLM	1031.8
	deltaBLM + GFP-BLM-delta13_ICRF_GFP-PICH-CEN-17 ana-like.czi											BLM	0
		PICH	1	2349.4			PICH	2349.4				BLM	0
		BLM	2	11787.8			PICH	5412.5	3063.1	3063.1		BLM	0
		PICH	3	5412.5			PICH	3455.1	1105.7	1105.7		BLM	9.6
		BLM	4	11788.3			PICH	5624	3274.6	3274.6		BLM	0
		PICH	5	3455.1			PICH	6121.8	3772.4	3772.4		BLM	0
		BLM	6	10971.6			PICH	5647.7	3298.3	3298.3		BLM
		PICH	7	5624			PICH	4700.4	2351	2351		BLM	834.6
		BLM	8	12819.6			PICH	5256.4	2907	2907		BLM	52.8
		PICH	9	6121.8			PICH	3955.3	1605.9	1605.9		BLM	727.2
		BLM	10	11139			PICH	5031.1	2681.7	2681.7		BLM	1413.1
		PICH	11	5647.7			BLM	11787.8				BLM	10344.4
		BLM	12	11716.6			BLM	11788.3	0.5	0.5		BLM	11483.2
		PICH	13	4700.4			BLM	10971.6	-816.2	0		BLM
		BLM	14	10572.4			BLM	12819.6	1031.8	1031.8		BLM	1192.2
		PICH	15	5256.4			BLM	11139	-648.8	0		BLM	977.2
		BLM	16	11797.4			BLM	11716.6	-71.2	0		BLM	1541.9
		PICH	17	3955.3			BLM	10572.4	-1215.4	0		BLM	0
		BLM	18	9212.1			BLM	11797.4	9.6	9.6		BLM	0
		PICH	19	5031.1			BLM	9212.1	-2575.7	0		BLM	0
		BLM	20	10874			BLM	10874	-913.8	0		BLM	0
												BLM
	deltaBLM + GFP-BLM-delta13_ICRF_GFP-PICH-CEN-15 mid ana.czi											BLM	0
		PICH	1	3149.5			PICH	3149.5				BLM	0
		BLM	2	11628.7			PICH	7293	4143.5	4143.5		BLM	452.4
		PICH	3	7293			PICH	6433.6	3284.1	3284.1		BLM	0
		BLM	4	12463.3			PICH	6576.7	3427.2	3427.2		BLM	9.8
		PICH	5	6433.6			PICH	7091.8	3942.3	3942.3		BLM
		BLM	6	11681.5			BLM	11628.7				BLM	0
		PICH	7	6576.7			BLM	12463.3	834.6	834.6		BLM	0
		BLM	8	12355.9			BLM	11681.5	52.8	52.8		BLM	0
		PICH	9	7091.8			BLM	12355.9	727.2	727.2		BLM	629.6
		BLM	10	13041.8			BLM	13041.8	1413.1	1413.1		BLM	570.6
												BLM	99.1
	deltaBLM + GFP-BLM-delta13_ICRF_GFP-PICH-CEN-09 mid ana.czi											BLM	0
		PICH	1	1785.6			PICH	1785.6				BLM	719.2
		BLM	2	12130			PICH	3161.8	1376.2	1376.2		BLM	0
		PICH	3	3161.8			BLM	12130		0		BLM	397.2
		BLM	4	13268.8			BLM	13268.8	1138.8	1138.8		BLM	0
												BLM	614.5
	deltaBLM + GFP-BLM-delta13_ICRF_GFP-PICH-CEN-08 early ana.czi											BLM	0
		PICH	1	2717.2			PICH	2717.2				BLM
		BLM	2	19069.4			PICH	3881.9	1164.7	1164.7		BLM	0
		PICH	3	3881.9			PICH	4197.6	1480.4	1480.4		BLM	0
		BLM	4	20261.6			PICH	4256.1	1538.9	1538.9		BLM	7
		PICH	5	4197.6			PICH	3602.2	885	885		BLM	0
		BLM	6	20046.6			PICH	4599.4	1882.2	1882.2		BLM	0
		PICH	7	4256.1			PICH	5360.6	2643.4	2643.4		BLM	119.2
		BLM	8	20611.3			PICH	3749.4	1032.2	1032.2		BLM	641.8
		PICH	9	3602.2			BLM	19069.4				BLM	254.5
		BLM	10	16854.3			BLM	20261.6	1192.2	1192.2		BLM	732.2
		PICH	11	4599.4			BLM	20046.6	977.2	977.2		BLM
		BLM	12	16832.1			BLM	20611.3	1541.9	1541.9		BLM	0
		PICH	13	5360.6			BLM	16854.3	-2215.1	0		BLM	0
		BLM	14	16744.4			BLM	16832.1	-2237.3	0		BLM	0
		PICH	15	3749.4			BLM	16744.4	-2325	0		BLM	0
		BLM	16	15968			BLM	15968	-3101.4	0		BLM	0
												BLM	0
	deltaBLM + GFP-BLM-delta13_ICRF_GFP-PICH-CEN-07 mid ana.czi											BLM	323.7
		PICH	1	2359.4			PICH	2359.4				BLM	240.3
		BLM	2	6590.1			PICH	4906.1	2546.7	2546.7		BLM	535.2
		PICH	3	4906.1			PICH	4074	1714.6	1714.6		BLM	677.9
		BLM	4	6214.4			PICH	4302.7	1943.3	1943.3		BLM	0
		PICH	5	4074			PICH	5207.5	2848.1	2848.1		BLM	0
		BLM	6	5808.9			PICH	6055.4	3696	3696		BLM	0
		PICH	7	4302.7			BLM	6590.1				BLM
		BLM	8	7042.5			BLM	6214.4	-375.7	0		BLM	1105
		PICH	9	5207.5			BLM	5808.9	-781.2	0
		BLM	10	6431.2			BLM	7042.5	452.4	452.4
		PICH	11	6055.4			BLM	6431.2	-158.9	0
		BLM	12	6599.9			BLM	6599.9	9.8	9.8
	deltaBLM + GFP-BLM-delta13_ICRF_GFP-PICH-CEN-06 early ana.czi
		PICH	1	1807.2			PICH	1807.2
		BLM	2	9505.5			PICH	3743.8	1936.6	1936.6
		PICH	3	3743.8			PICH	3885.2	2078	2078
		BLM	4	8341.4			PICH	3111.6	1304.4	1304.4
		PICH	5	3885.2			PICH	5137	3329.8	3329.8
		BLM	6	7989			PICH	5445.7	3638.5	3638.5
		PICH	7	3111.6			PICH	6039.9	4232.7	4232.7
		BLM	8	8558.2			PICH	3940.5	2133.3	2133.3
		PICH	9	5137			PICH	5220	3412.8	3412.8
		BLM	10	10135.1			PICH	4996.8	3189.6	3189.6
		PICH	11	5445.7			PICH	4147	2339.8	2339.8
		BLM	12	10076.1			PICH	4702.4	2895.2	2895.2
		PICH	13	6039.9			PICH	6256.1	4448.9	4448.9
		BLM	14	9604.6			PICH	4439.6	2632.4	2632.4
		PICH	15	3940.5			BLM	9505.5
		BLM	16	8966.8			BLM	8341.4	-1164.1	0
		PICH	17	5220			BLM	7989	-1516.5	0
		BLM	18	10224.7			BLM	8558.2	-947.3	0
		PICH	19	4996.8			BLM	10135.1	629.6	629.6
		BLM	20	9164.9			BLM	10076.1	570.6	570.6
		PICH	21	4147			BLM	9604.6	99.1	99.1
		BLM	22	9902.7			BLM	8966.8	-538.7	0
		PICH	23	4702.4			BLM	10224.7	719.2	719.2
		BLM	24	8861.3			BLM	9164.9	-340.6	0
		PICH	25	6256.1			BLM	9902.7	397.2	397.2
		BLM	26	10120			BLM	8861.3	-644.2	0
		PICH	27	4439.6			BLM	10120	614.5	614.5
		BLM	28	9315.9			BLM	9315.9	-189.6	0
	deltaBLM + GFP-BLM-delta13_ICRF_GFP-PICH-CEN-05 early ana.czi
		PICH	1	1808.6			PICH	1808.6
		BLM	2	4614.6			PICH	2718.6	910	910
		PICH	3	2718.6			PICH	2700.8	892.2	892.2
		BLM	4	4605.7			PICH	3042.6	1234	1234
		PICH	5	2700.8			PICH	3813.3	2004.7	2004.7
		BLM	6	4584.9			PICH	2940.7	1132.1	1132.1
		PICH	7	3042.6			PICH	4183.1	2374.5	2374.5
		BLM	8	4621.6			PICH	2744	935.4	935.4
		PICH	9	3813.3			PICH	2836.4	1027.8	1027.8
		BLM	10	4491			PICH	5965	4156.4	4156.4
		PICH	11	2940.7			BLM	4614.6
		BLM	12	4266.6			BLM	4605.7	-8.9	0
		PICH	13	4183.1			BLM	4584.9	-29.7	0
		BLM	14	4733.8			BLM	4621.6	7	7
		PICH	15	2744			BLM	4491	-123.6	0
		BLM	16	5256.4			BLM	4266.6	-348	0
		PICH	17	2836.4			BLM	4733.8	119.2	119.2
		BLM	18	4869.1			BLM	5256.4	641.8	641.8
		PICH	19	5965			BLM	4869.1	254.5	254.5
		BLM	20	5346.8			BLM	5346.8	732.2	732.2
	deltaBLM + GFP-BLM-delta13_ICRF_GFP-PICH-CEN-03 ana-like.czi
		PICH	1	2946.3			PICH	2946.3
		BLM	2	28720.8			PICH	4450	1503.7	1503.7
		PICH	3	4450			PICH	3909.1	962.8	962.8
		BLM	4	23873.4			PICH	5443.3	2497	2497
		PICH	5	3909.1			PICH	5951.7	3005.4	3005.4
		BLM	6	24487.6			PICH	4812.1	1865.8	1865.8
		PICH	7	5443.3			PICH	4750.5	1804.2	1804.2
		BLM	8	26652.8			PICH	5352.9	2406.6	2406.6
		PICH	9	5951.7			PICH	5211.4	2265.1	2265.1
		BLM	10	27601			PICH	5493	2546.7	2546.7
		PICH	11	4812.1			PICH	5485.3	2539	2539
		BLM	12	23557.5			PICH	3856.7	910.4	910.4
		PICH	13	4750.5			PICH	4069.2	1122.9	1122.9
		BLM	14	25185.4			PICH	5808.9	2862.6	2862.6
		PICH	15	5352.9			BLM	28720.8
		BLM	16	29044.5			BLM	23873.4	-4847.4	0
		PICH	17	5211.4			BLM	24487.6	-4233.2	0
		BLM	18	28961.1			BLM	26652.8	-2068	0
		PICH	19	5493			BLM	27601	-1119.8	0
		BLM	20	29256			BLM	23557.5	-5163.3	0
		PICH	21	5485.3			BLM	25185.4	-3535.4	0
		BLM	22	29398.7			BLM	29044.5	323.7	323.7
		PICH	23	3856.7			BLM	28961.1	240.3	240.3
		BLM	24	25065.5			BLM	29256	535.2	535.2
		PICH	25	4069.2			BLM	29398.7	677.9	677.9
		BLM	26	25394.3			BLM	25065.5	-3655.3	0
		PICH	27	5808.9			BLM	25394.3	-3326.5	0
		BLM	28	25803			BLM	25803	-2917.8	0
	deltaBLM + GFP-BLM-delta13_ICRF_GFP-PICH-CEN-02 mid ana.czi
		PICH	1	2584.5			PICH	2584.5
		BLM	2	16703.8			PICH	4591.1	2006.6	2006.6
		PICH	3	4591.1			BLM	16703.8
		BLM	4	17808.8			BLM	17808.8	1105	1105

## Sheet: GFP-NN Analysis
	GFP-BLM deltaNN
	deltaBLM + GFP-BLM-NN_ICRF_GFP-PICH-CEN-62 mid-ana.czi			Mean									PICH and BLM
	Background	PICH	1	2861.5			PICH	2861.5					PICH	BLM
	Background	BLM	2	7912.3			PICH	7101.8	4240.3	4240.3			4240.3	725
		PICH	3	7101.8			PICH	6484.3	3622.8	3622.8			3622.8	387.7
		BLM	4	8637.3			PICH	10521.5	7660	7660			7660	1790
		PICH	5	6484.3			BLM	7912.3
		BLM	6	8300			BLM	8637.3	725	725			4533.6	0
		PICH	7	10521.5			BLM	8300	387.7	387.7			5450	0
		BLM	8	9702.3			BLM	9702.3	1790	1790			2721	0
													5424.5	938.8
	deltaBLM + GFP-BLM-NN_ICRF_GFP-PICH-CEN-61 ana-like.czi												4908.8	0
		PICH	1	2122.9			PICH	2122.9					5931.1	910
		BLM	2	11828.8			PICH	6656.5	4533.6	4533.6			6910.7	342.6
		PICH	3	6656.5			PICH	7572.9	5450	5450			3797.6	0
		BLM	4	10740.2			PICH	4843.9	2721	2721			5400.9	36.4
		PICH	5	7572.9			PICH	7547.4	5424.5	5424.5
		BLM	6	11310.3			PICH	7031.7	4908.8	4908.8			2536	67.7
		PICH	7	4843.9			PICH	8054	5931.1	5931.1			2698.9	183.9
		BLM	8	10993.5			PICH	9033.6	6910.7	6910.7			3426.1	1010.2
		PICH	9	7547.4			PICH	5920.5	3797.6	3797.6			3274.3	396.6
		BLM	10	12767.6			PICH	7523.8	5400.9	5400.9			3359	1770.4
		PICH	11	7031.7			BLM	11828.8					3395.1	2220
		BLM	12	11575.7			BLM	10740.2	-1088.6	0			2478.5	460.8
		PICH	13	8054			BLM	11310.3	-518.5	0			4064.6	1272.1
		BLM	14	12738.8			BLM	10993.5	-835.3	0			4382.9	998.9
		PICH	15	9033.6			BLM	12767.6	938.8	938.8
		BLM	16	12171.4			BLM	11575.7	-253.1	0			5705.6	322.3
		PICH	17	5920.5			BLM	12738.8	910	910			3238.5	0
		BLM	18	11122.6			BLM	12171.4	342.6	342.6			7078.7	141.6
		PICH	19	7523.8			BLM	11122.6	-706.2	0			5343.1	729.8
		BLM	20	11865.2			BLM	11865.2	36.4	36.4			5608.7	508.4
													5951.3	0
	deltaBLM + GFP-BLM-NN_ICRF_GFP-PICH-CEN-60 early ana.czi												3167	425.7
		PICH	1	2318.2			PICH	2318.2					3113.9	97.4
		BLM	2	9610.2			PICH	4854.2	2536	2536			4869.2	105.9
		PICH	3	4854.2			PICH	5017.1	2698.9	2698.9			4187.6	230.2
		BLM	4	9677.9			PICH	5744.3	3426.1	3426.1			4628.3	410.8
		PICH	5	5017.1			PICH	5592.5	3274.3	3274.3			4304.2	0
		BLM	6	9794.1			PICH	5677.2	3359	3359			5603.4	0
		PICH	7	5744.3			PICH	5713.3	3395.1	3395.1			2991.2	0
		BLM	8	10620.4			PICH	4796.7	2478.5	2478.5			3974.7	0
		PICH	9	5592.5			PICH	6382.8	4064.6	4064.6			6595.3	0
		BLM	10	10006.8			PICH	6701.1	4382.9	4382.9
		PICH	11	5677.2			BLM	9610.2					3183.9	314.7
		BLM	12	11380.6			BLM	9677.9	67.7	67.7			2259.3	291.8
		PICH	13	5713.3			BLM	9794.1	183.9	183.9			2266.7	241.5
		BLM	14	11830.2			BLM	10620.4	1010.2	1010.2			1985.7	0
		PICH	15	4796.7			BLM	10006.8	396.6	396.6			1802.5	0
		BLM	16	10071			BLM	11380.6	1770.4	1770.4			632.1	0
		PICH	17	6382.8			BLM	11830.2	2220	2220
		BLM	18	10882.3			BLM	10071	460.8	460.8			2146.3	0
		PICH	19	6701.1			BLM	10882.3	1272.1	1272.1			1831.6	0
		BLM	20	10609.1			BLM	10609.1	998.9	998.9			2776.5	0
													3118.4	110.4
	deltaBLM + GFP-BLM-NN_ICRF_GFP-PICH-CEN-58 ana-like.czi												1667	1328.9
		PICH	1	3068.3			PICH	3068.3					2222.4	0
		BLM	2	7641.7			PICH	8773.9	5705.6	5705.6			2507.4	0
		PICH	3	8773.9			PICH	6306.8	3238.5	3238.5			2636.9	570.4
		BLM	4	7964			PICH	10147	7078.7	7078.7			1533	0
		PICH	5	6306.8			PICH	8411.4	5343.1	5343.1
		BLM	6	6398.5			PICH	8677	5608.7	5608.7			2082.7	0
		PICH	7	10147			PICH	9019.6	5951.3	5951.3			3129.5	0
		BLM	8	7783.3			PICH	6235.3	3167	3167			2709.5	0
		PICH	9	8411.4			PICH	6182.2	3113.9	3113.9			2210.7	0
		BLM	10	8371.5			PICH	7937.5	4869.2	4869.2			2554.3	0
		PICH	11	8677			PICH	7255.9	4187.6	4187.6			1388.4	0
		BLM	12	8150.1			PICH	7696.6	4628.3	4628.3			1592.4	0
		PICH	13	9019.6			PICH	7372.5	4304.2	4304.2			2522.1	0
		BLM	14	7252.5			PICH	8671.7	5603.4	5603.4			3947.2	0
		PICH	15	6235.3			PICH	6059.5	2991.2	2991.2
		BLM	16	8067.4			PICH	7043	3974.7	3974.7			2840.6	348.2
		PICH	17	6182.2			PICH	9663.6	6595.3	6595.3			4387.7	0
		BLM	18	7739.1			BLM	7641.7					4280.3	85.4
		PICH	19	7937.5			BLM	7964	322.3	322.3			4047.5	38.7
		BLM	20	7747.6			BLM	6398.5	-1243.2	0			3095.9	0
		PICH	21	7255.9			BLM	7783.3	141.6	141.6			1742.5	0
		BLM	22	7871.9			BLM	8371.5	729.8	729.8			3594.5	0
		PICH	23	7696.6			BLM	8150.1	508.4	508.4			4340.1	0
		BLM	24	8052.5			BLM	7252.5	-389.2	0			1555.1	0
		PICH	25	7372.5			BLM	8067.4	425.7	425.7
		BLM	26	6762.6			BLM	7739.1	97.4	97.4			7941.8	602.1
		PICH	27	8671.7			BLM	7747.6	105.9	105.9			6474.1	233.6
		BLM	28	7578.5			BLM	7871.9	230.2	230.2			5618.3	372.2
		PICH	29	6059.5			BLM	8052.5	410.8	410.8			5625.6	241.6
		BLM	30	6937.8			BLM	6762.6	-879.1	0			7232.8	295.9
		PICH	31	7043			BLM	7578.5	-63.2	0			8199.2	174.8
		BLM	32	6593.2			BLM	6937.8	-703.9	0			6744.1	0
		PICH	33	9663.6			BLM	6593.2	-1048.5	0			6535.4	0
		BLM	34	6884.6			BLM	6884.6	-757.1	0			1460.3	0
													5645.3	78
	deltaBLM + GFP-BLM-NN_ICRF_GFP-PICH-CEN-57 mid ana.czi
		PICH	1	2621.2			PICH	2621.2					2187.1	744.4
		BLM	2	7197.8			PICH	5805.1	3183.9	3183.9			2784.8	357.2
		PICH	3	5805.1			PICH	4880.5	2259.3	2259.3			3181.1	0
		BLM	4	7512.5			PICH	4887.9	2266.7	2266.7			2231.2	0
		PICH	5	4880.5			PICH	4606.9	1985.7	1985.7			4500.7	1441
		BLM	6	7489.6			PICH	4423.7	1802.5	1802.5			3940.2	1438.8
		PICH	7	4887.9			PICH	3253.3	632.1	632.1			2622.1	180.5
		BLM	8	7439.3			BLM	7197.8					2725.9	0
		PICH	9	4606.9			BLM	7512.5	314.7	314.7			3324.3	810.9
		BLM	10	7030.3			BLM	7489.6	291.8	291.8
		PICH	11	4423.7			BLM	7439.3	241.5	241.5			3528.1	393.3
		BLM	12	7073.8			BLM	7030.3	-167.5	0			2741.2	179.5
		PICH	13	3253.3			BLM	7073.8	-124	0			3826.6	323.5
		BLM	14	6607.5			BLM	6607.5	-590.3	0			5548.8	349.7
													6542.9	333.4
	deltaBLM + GFP-BLM-NN_ICRF_GFP-PICH-CEN-56 metaphase-like.czi												6721.8	186.2
		PICH	1	2442.8			PICH	2442.8					7151.2	254.7
		BLM	2	11530.9			PICH	4589.1	2146.3	2146.3			5515.4	131.3
		PICH	3	4589.1			PICH	4274.4	1831.6	1831.6			8102.1	259.8
		BLM	4	10438.5			PICH	5219.3	2776.5	2776.5			5554.2	127.1
		PICH	5	4274.4			PICH	5561.2	3118.4	3118.4			7240.1	20.4
		BLM	6	10082.4			PICH	4109.8	1667	1667			5588.8	61.8
		PICH	7	5219.3			PICH	4665.2	2222.4	2222.4			4820.3	0
		BLM	8	10981.3			PICH	4950.2	2507.4	2507.4			5603.2	122.4
		PICH	9	5561.2			PICH	5079.7	2636.9	2636.9
		BLM	10	11641.3			PICH	3975.8	1533	1533			2494.2	0
		PICH	11	4109.8			BLM	11530.9					2629.9	0
		BLM	12	12859.8			BLM	10438.5	-1092.4	0			3185.6	295.4
		PICH	13	4665.2			BLM	10082.4	-1448.5	0			2124.1	250.5
		BLM	14	9819.3			BLM	10981.3	-549.6	0			2040.8	177.9
		PICH	15	4950.2			BLM	11641.3	110.4	110.4			3043.6	0
		BLM	16	11237.7			BLM	12859.8	1328.9	1328.9			2237.8	0
		PICH	17	5079.7			BLM	9819.3	-1711.6	0			1670	337.9
		BLM	18	12101.3			BLM	11237.7	-293.2	0			3353.9	337
		PICH	19	3975.8			BLM	12101.3	570.4	570.4
		BLM	20	10059.3			BLM	10059.3	-1471.6	0			6129.8	59.2
													4761.3	2.4
	deltaBLM + GFP-BLM-NN_ICRF_GFP-PICH-CEN-54 metaphase-like.czi												4783.6	230.7
		PICH	1	2283.5			PICH	2283.5					4475.5	0
		BLM	2	5249.8			PICH	4366.2	2082.7	2082.7			5121	85.5
		PICH	3	4366.2			PICH	5413	3129.5	3129.5			3563.2	688.1
		BLM	4	4749.5			PICH	4993	2709.5	2709.5			4506.3	0
		PICH	5	5413			PICH	4494.2	2210.7	2210.7
		BLM	6	5400.3			PICH	4837.8	2554.3	2554.3			1101.5	124.7
		PICH	7	4993			PICH	3671.9	1388.4	1388.4			2502.3	1483
		BLM	8	5280.5			PICH	3875.9	1592.4	1592.4			2317.4	842.2
		PICH	9	4494.2			PICH	4805.6	2522.1	2522.1
		BLM	10	5257.4			PICH	6230.7	3947.2	3947.2			1622	0
		PICH	11	4837.8			BLM	5249.8					1683.1	0
		BLM	12	5575			BLM	4749.5	-963.8	0			1835.8	1075.3
		PICH	13	3671.9			BLM	5400.3	-313	0			1106.8	0
		BLM	14	5351.7			BLM	5280.5	-432.8	0			1983.9	21.4
		PICH	15	3875.9			BLM	5257.4	-455.9	0			1408.5	248.8
		BLM	16	5261.6			BLM	5575	-138.3	0			1498.7	0
		PICH	17	4805.6			BLM	5351.7	-361.6	0
		BLM	18	5485.1			BLM	5261.6	-451.7	0			2841.9	673.8
		PICH	19	6230.7			BLM	5485.1	-228.2	0			3648.8	1473.1
		BLM	20	5712.9			BLM	5712.9	-0.4	0			2665.1	0
													3443.1	879
	deltaBLM + GFP-BLM-NN_ICRF_GFP-PICH-CEN-53 mid ana.czi												3118.3	446.2
		PICH	1	4300.4			PICH	4300.4					4855.2	1390.6
		BLM	2	5893.3			PICH	7141	2840.6	2840.6			2567.9	902.4
		PICH	3	7141			PICH	8688.1	4387.7	4387.7
		BLM	4	6241.5			PICH	8580.7	4280.3	4280.3			1724.9	633.9
		PICH	5	8688.1			PICH	8347.9	4047.5	4047.5			2923.3	549.6
		BLM	6	5824			PICH	7396.3	3095.9	3095.9			2602.4	68.8
		PICH	7	8580.7			PICH	6042.9	1742.5	1742.5
		BLM	8	5978.7			PICH	7894.9	3594.5	3594.5			5414.3	0
		PICH	9	8347.9			PICH	8640.5	4340.1	4340.1			5966.4	0
		BLM	10	5932			PICH	5855.5	1555.1	1555.1			5190.2	881.5
		PICH	11	7396.3			BLM	5893.3					7810.9	478.7
		BLM	12	5723.9			BLM	6241.5	348.2	348.2			4534.7	1689.4
		PICH	13	6042.9			BLM	5824	-69.3	0			6052.2	280.8
		BLM	14	5246			BLM	5978.7	85.4	85.4			6222.9	139.6
		PICH	15	7894.9			BLM	5932	38.7	38.7			5704.2	2.4
		BLM	16	5294.5			BLM	5723.9	-169.4	0			7923.6	0
		PICH	17	8640.5			BLM	5246	-647.3	0			5572.6	0
		BLM	18	5662			BLM	5294.5	-598.8	0			3614.5	917.3
		PICH	19	5855.5			BLM	5662	-231.3	0			8379.9	209.7
		BLM	20	4946.3			BLM	4946.3	-947	0
													4124.2	593.7
	deltaBLM + GFP-BLM-NN_ICRF_GFP-PICH-CEN-52 early ana.czi												3044.4	0
		PICH	1	2427.2			PICH	2427.2					3892.3	1515.3
		BLM	2	4795			PICH	10369	7941.8	7941.8			3595.8	447.1
		PICH	3	10369			PICH	8901.3	6474.1	6474.1			2455.1	0
		BLM	4	5397.1			PICH	8045.5	5618.3	5618.3
		PICH	5	8901.3			PICH	8052.8	5625.6	5625.6			1380.8	0
		BLM	6	5028.6			PICH	9660	7232.8	7232.8			3264.4	0
		PICH	7	8045.5			PICH	10626.4	8199.2	8199.2			3431.1	0
		BLM	8	5167.2			PICH	9171.3	6744.1	6744.1			2665.4	23.2
		PICH	9	8052.8			PICH	8962.6	6535.4	6535.4			4562.6	1077.2
		BLM	10	5036.6			PICH	3887.5	1460.3	1460.3			4016	1386.7
		PICH	11	9660			PICH	8072.5	5645.3	5645.3			4312.6	253.2
		BLM	12	5090.9			BLM	4795					3583.7	0
		PICH	13	10626.4			BLM	5397.1	602.1	602.1			3168.2	0
		BLM	14	4969.8			BLM	5028.6	233.6	233.6			2439.4	0
		PICH	15	9171.3			BLM	5167.2	372.2	372.2			3365.5	667.8
		BLM	16	4616.1			BLM	5036.6	241.6	241.6
		PICH	17	8962.6			BLM	5090.9	295.9	295.9			2435.4	0
		BLM	18	4587.5			BLM	4969.8	174.8	174.8			2633.6	326.4
		PICH	19	3887.5			BLM	4616.1	-178.9	0			2551	678.3
		BLM	20	4082.7			BLM	4587.5	-207.5	0			2213.4	197.2
		PICH	21	8072.5			BLM	4082.7	-712.3	0			2436.8	308.6
		BLM	22	4873			BLM	4873	78	78			2264.7	0
	deltaBLM + GFP-BLM-NN_ICRF_GFP-PICH-CEN-51 early ana.czi												1972.7	0
		PICH	1	1716.4			PICH	1716.4					1146.4	0
		BLM	2	11221.6			PICH	3903.5	2187.1	2187.1			2734.4	183.7
		PICH	3	3903.5			PICH	4501.2	2784.8	2784.8			2248	0
		BLM	4	11966			PICH	4897.5	3181.1	3181.1			1953.9	0
		PICH	5	4501.2			PICH	3947.6	2231.2	2231.2			1675.9	241.9
		BLM	6	11578.8			PICH	6217.1	4500.7	4500.7			1907.5	254.6
		PICH	7	4897.5			PICH	5656.6	3940.2	3940.2			1809.6	0
		BLM	8	11029			PICH	4338.5	2622.1	2622.1			1752.7	0
		PICH	9	3947.6			PICH	4442.3	2725.9	2725.9			2376.9	0
		BLM	10	10943.5			PICH	5040.7	3324.3	3324.3			2431.5	0
		PICH	11	6217.1			BLM	11221.6					2240	0
		BLM	12	12662.6			BLM	11966	744.4	744.4
		PICH	13	5656.6			BLM	11578.8	357.2	357.2			3957.5	746.5
		BLM	14	12660.4			BLM	11029	-192.6	0			5786.3	976.1
		PICH	15	4338.5			BLM	10943.5	-278.1	0			6479.2	2116.2
		BLM	16	11402.1			BLM	12662.6	1441	1441			4703.3	1114.8
		PICH	17	4442.3			BLM	12660.4	1438.8	1438.8			4963.1	2042.8
		BLM	18	10772			BLM	11402.1	180.5	180.5			3560.4	734.7
		PICH	19	5040.7			BLM	10772	-449.6	0
		BLM	20	12032.5			BLM	12032.5	810.9	810.9			4450.1	1468.3
													3359.1	1068.4
	deltaBLM + GFP-BLM-NN_ICRF_GFP-PICH-CEN-49 ana-like.czi												4706.8	1306.4
		PICH	1	1765			PICH	1765					2311.4	1133
		BLM	2	4704.5			PICH	5293.1	3528.1	3528.1			3025.5	650.4
		PICH	3	5293.1			PICH	4506.2	2741.2	2741.2			3392.8	611.7
		BLM	4	5097.8			PICH	5591.6	3826.6	3826.6			4230.2	987.9
		PICH	5	4506.2			PICH	7313.8	5548.8	5548.8
		BLM	6	4884			PICH	8307.9	6542.9	6542.9			2856.2	420.9
		PICH	7	5591.6			PICH	8486.8	6721.8	6721.8			3429.2	1021
		BLM	8	5028			PICH	8916.2	7151.2	7151.2			4063.7	910
		PICH	9	7313.8			PICH	7280.4	5515.4	5515.4			3962.9	1615.6
		BLM	10	5054.2			PICH	9867.1	8102.1	8102.1			2618.1	929.5
		PICH	11	8307.9			PICH	7319.2	5554.2	5554.2			3022.4	2031
		BLM	12	5037.9			PICH	9005.1	7240.1	7240.1			3798.9	1238.7
		PICH	13	8486.8			PICH	7353.8	5588.8	5588.8			2934.1	1068.6
		BLM	14	4890.7			PICH	6585.3	4820.3	4820.3
		PICH	15	8916.2			PICH	7368.2	5603.2	5603.2			4689.1	434.8
		BLM	16	4959.2			BLM	4704.5					4889.8	699
		PICH	17	7280.4			BLM	5097.8	393.3	393.3			7106.9	0
		BLM	18	4835.8			BLM	4884	179.5	179.5			3802	0
		PICH	19	9867.1			BLM	5028	323.5	323.5			5621.5	1148.5
		BLM	20	4964.3			BLM	5054.2	349.7	349.7			5213.1	737.1
		PICH	21	7319.2			BLM	5037.9	333.4	333.4			4980.2	177.7
		BLM	22	4831.6			BLM	4890.7	186.2	186.2			6939.4	195.9
		PICH	23	9005.1			BLM	4959.2	254.7	254.7			3288.6	0
		BLM	24	4724.9			BLM	4835.8	131.3	131.3			3486.5	185.1
		PICH	25	7353.8			BLM	4964.3	259.8	259.8			3845.7	476.2
		BLM	26	4766.3			BLM	4831.6	127.1	127.1			2073	0
		PICH	27	6585.3			BLM	4724.9	20.4	20.4			5452	233.7
		BLM	28	4635.1			BLM	4766.3	61.8	61.8
		PICH	29	7368.2			BLM	4635.1	-69.4	0			4616.5	392.8
		BLM	30	4826.9			BLM	4826.9	122.4	122.4			4818.6	575.9
													4348.7	144.1
	deltaBLM + GFP-BLM-NN_ICRF_GFP-PICH-CEN-48 metaphase-like.czi												4647.4	552
		PICH	1	1713			PICH	1713					3819.7	431.6
		BLM	2	5947.6			PICH	4207.2	2494.2	2494.2			2562.5	0
		PICH	3	4207.2			PICH	4342.9	2629.9	2629.9			4668.5	802
		BLM	4	5220.3			PICH	4898.6	3185.6	3185.6
		PICH	5	4342.9			PICH	3837.1	2124.1	2124.1			2445.8	0
		BLM	6	5264.5			PICH	3753.8	2040.8	2040.8			4546.5	901.7
		PICH	7	4898.6			PICH	4756.6	3043.6	3043.6			5416.3	1366
		BLM	8	6243			PICH	3950.8	2237.8	2237.8			3762.6	587.9
		PICH	9	3837.1			PICH	3383	1670	1670			3690.6	0
		BLM	10	6198.1			PICH	5066.9	3353.9	3353.9			3584.6	263.9
		PICH	11	3753.8			BLM	5947.6
		BLM	12	6125.5			BLM	5220.3	-727.3	0			1405.3	0
		PICH	13	4756.6			BLM	5264.5	-683.1	0			916.6	0
		BLM	14	5707.1			BLM	6243	295.4	295.4			2713.5	357.5
		PICH	15	3950.8			BLM	6198.1	250.5	250.5			3442.1	848.2
		BLM	16	4986			BLM	6125.5	177.9	177.9			2104.1	445
		PICH	17	3383			BLM	5707.1	-240.5	0			3367.8	799.6
		BLM	18	6285.5			BLM	4986	-961.6	0			2957	1051.4
		PICH	19	5066.9			BLM	6285.5	337.9	337.9			2938.5	0
		BLM	20	6284.6			BLM	6284.6	337	337			2869.5	0
	deltaBLM + GFP-BLM-NN_ICRF_GFP-PICH-CEN-46 metaphase-like.czi												1977.8	272.9
		PICH	1	1158.4			PICH	1158.4					1251.1	0
		BLM	2	3566.4			PICH	7288.2	6129.8	6129.8			2018.2	430.9
		PICH	3	7288.2			PICH	5919.7	4761.3	4761.3
		BLM	4	3625.6			PICH	5942	4783.6	4783.6			1617.1	0
		PICH	5	5919.7			PICH	5633.9	4475.5	4475.5			2289.3	1204.2
		BLM	6	3568.8			PICH	6279.4	5121	5121			2084.9	903.1
		PICH	7	5942			PICH	4721.6	3563.2	3563.2			2415.8	1235
		BLM	8	3797.1			PICH	5664.7	4506.3	4506.3			2332.6	0
		PICH	9	5633.9			BLM	3566.4
		BLM	10	3543.9			BLM	3625.6	59.2	59.2			3338.9	773
		PICH	11	6279.4			BLM	3568.8	2.4	2.4			3427.2	828.2
		BLM	12	3651.9			BLM	3797.1	230.7	230.7			2383.8	218.1
		PICH	13	4721.6			BLM	3543.9	-22.5	0			2289.2	867.2
		BLM	14	4254.5			BLM	3651.9	85.5	85.5
		PICH	15	5664.7			BLM	4254.5	688.1	688.1			1475.7	0
		BLM	16	3469.2			BLM	3469.2	-97.2	0			2003.6	0
													3774.5	1545.1
	deltaBLM + GFP-BLM-NN_ICRF_GFP-PICH-CEN-44 mid ana.czi												3768.1	748.8
		PICH	1	1649.4			PICH	1649.4					1526.7	2069.7
		BLM	2	11256.4			PICH	2750.9	1101.5	1101.5			1333.9	0
		PICH	3	2750.9			PICH	4151.7	2502.3	2502.3
		BLM	4	11381.1			PICH	3966.8	2317.4	2317.4			1830	0
		PICH	5	4151.7			BLM	11256.4					2634.2	0
		BLM	6	12739.4			BLM	11381.1	124.7	124.7			2489.7	111.9
		PICH	7	3966.8			BLM	12739.4	1483	1483			4315.4	187.3
		BLM	8	12098.6			BLM	12098.6	842.2	842.2			4007.4	0
													3655.7	73.3
	deltaBLM + GFP-BLM-NN_ICRF_GFP-PICH-CEN-43 ana-like.czi												4866.3	354.3
		PICH	1	1673.8			PICH	1673.8
		BLM	2	10857			PICH	3295.8	1622	1622			2507.4	0
		PICH	3	3295.8			PICH	3356.9	1683.1	1683.1			2378.7	214
		BLM	4	10681.9			PICH	3509.6	1835.8	1835.8			3174.7	918.9
		PICH	5	3356.9			PICH	2780.6	1106.8	1106.8			4189.4	1115.6
		BLM	6	10754.5			PICH	3657.7	1983.9	1983.9			3176.7	0
		PICH	7	3509.6			PICH	3082.3	1408.5	1408.5			2186.3	0
		BLM	8	11932.3			PICH	3172.5	1498.7	1498.7			2863.9	0
		PICH	9	2780.6			BLM	10857					2630.7	0
		BLM	10	10238.8			BLM	10681.9	-175.1	0			3025.4	94.9
		PICH	11	3657.7			BLM	10754.5	-102.5	0
		BLM	12	10878.4			BLM	11932.3	1075.3	1075.3			2751.9	60.7
		PICH	13	3082.3			BLM	10238.8	-618.2	0			3170.2	0
		BLM	14	11105.8			BLM	10878.4	21.4	21.4			5714.3	41.3
		PICH	15	3172.5			BLM	11105.8	248.8	248.8			4895.6	220.4
		BLM	16	10480.1			BLM	10480.1	-376.9	0			2142.5	55
													3327.1	118.4
	deltaBLM + GFP-BLM-NN_ICRF_GFP-PICH-CEN-42 ana-like.czi												4887.7	0
		PICH	1	1986.1			PICH	1986.1					4008.4	111.7
		BLM	2	7323.2			PICH	4828	2841.9	2841.9
		PICH	3	4828			PICH	5634.9	3648.8	3648.8			2928.2	1508.4
		BLM	4	7997			PICH	4651.2	2665.1	2665.1			2333.4	0
		PICH	5	5634.9			PICH	5429.2	3443.1	3443.1			2206.5	681.9
		BLM	6	8796.3			PICH	5104.4	3118.3	3118.3			2192	1394.4
		PICH	7	4651.2			PICH	6841.3	4855.2	4855.2			2083.1	204.4
		BLM	8	7153.9			PICH	4554	2567.9	2567.9			1859.8	0
		PICH	9	5429.2			BLM	7323.2
		BLM	10	8202.2			BLM	7997	673.8	673.8			4973.6	335.8
		PICH	11	5104.4			BLM	8796.3	1473.1	1473.1			2747.6	0
		BLM	12	7769.4			BLM	7153.9	-169.3	0			5368.5	1316.8
		PICH	13	6841.3			BLM	8202.2	879	879			5274.3	920.9
		BLM	14	8713.8			BLM	7769.4	446.2	446.2			4811	1658.3
		PICH	15	4554			BLM	8713.8	1390.6	1390.6			2951.5	0
		BLM	16	8225.6			BLM	8225.6	902.4	902.4			3931.1	350.9
													3942.2	152.7
	deltaBLM + GFP-BLM-NN_ICRF_GFP-PICH-CEN-41 mid ana.czi
		PICH	1	1712.1			PICH	1712.1					2413.4	590.5
		BLM	2	9400.1			PICH	3437	1724.9	1724.9			3022.3	898.1
		PICH	3	3437			PICH	4635.4	2923.3	2923.3			3339.9	758.5
		BLM	4	10034			PICH	4314.5	2602.4	2602.4			7319.8	1884.6
		PICH	5	4635.4			BLM	9400.1					4222	960.2
		BLM	6	9949.7			BLM	10034	633.9	633.9			4544.2	759.7
		PICH	7	4314.5			BLM	9949.7	549.6	549.6
		BLM	8	9468.9			BLM	9468.9	68.8	68.8			1177.8	0
													2055	0
	deltaBLM + GFP-BLM-NN_ICRF_GFP-PICH-CEN-40 metaphase-like.czi												2333.1	0
		PICH	1	1435.5			PICH	1435.5					2030.4	480.9
		BLM	2	12944.6			PICH	6849.8	5414.3	5414.3
		PICH	3	6849.8			PICH	7401.9	5966.4	5966.4			1137.4	0
		BLM	4	11471.9			PICH	6625.7	5190.2	5190.2			1141.9	58
		PICH	5	7401.9			PICH	9246.4	7810.9	7810.9			2387	471.3
		BLM	6	12715.8			PICH	5970.2	4534.7	4534.7			1228.4	41.4
		PICH	7	6625.7			PICH	7487.7	6052.2	6052.2			1547.8	0
		BLM	8	13826.1			PICH	7658.4	6222.9	6222.9
		PICH	9	9246.4			PICH	7139.7	5704.2	5704.2
		BLM	10	13423.3			PICH	9359.1	7923.6	7923.6
		PICH	11	5970.2			PICH	7008.1	5572.6	5572.6
		BLM	12	14634			PICH	5050	3614.5	3614.5
		PICH	13	7487.7			PICH	9815.4	8379.9	8379.9
		BLM	14	13225.4			BLM	12944.6
		PICH	15	7658.4			BLM	11471.9	-1472.7	0
		BLM	16	13084.2			BLM	12715.8	-228.8	0
		PICH	17	7139.7			BLM	13826.1	881.5	881.5
		BLM	18	12947			BLM	13423.3	478.7	478.7
		PICH	19	9359.1			BLM	14634	1689.4	1689.4
		BLM	20	12903.9			BLM	13225.4	280.8	280.8
		PICH	21	7008.1			BLM	13084.2	139.6	139.6
		BLM	22	12541.9			BLM	12947	2.4	2.4
		PICH	23	5050			BLM	12903.9	-40.7	0
		BLM	24	13861.9			BLM	12541.9	-402.7	0
		PICH	25	9815.4			BLM	13861.9	917.3	917.3
		BLM	26	13154.3			BLM	13154.3	209.7	209.7
	deltaBLM + GFP-BLM-NN_ICRF_GFP-PICH-CEN-35 mid ana.czi
		PICH	1	1106.3			PICH	1106.3
		BLM	2	6012			PICH	5230.5	4124.2	4124.2
		PICH	3	5230.5			PICH	4150.7	3044.4	3044.4
		BLM	4	6605.7			PICH	4998.6	3892.3	3892.3
		PICH	5	4150.7			PICH	4702.1	3595.8	3595.8
		BLM	6	5936.3			PICH	3561.4	2455.1	2455.1
		PICH	7	4998.6			BLM	6012
		BLM	8	7527.3			BLM	6605.7	593.7	593.7
		PICH	9	4702.1			BLM	5936.3	-75.7	0
		BLM	10	6459.1			BLM	7527.3	1515.3	1515.3
		PICH	11	3561.4			BLM	6459.1	447.1	447.1
		BLM	12	5840.6			BLM	5840.6	-171.4	0
	deltaBLM + GFP-BLM-NN_ICRF_GFP-PICH-CEN-34 ana.czi
		PICH	1	999.1			PICH	999.1
		BLM	2	9798.3			PICH	2379.9	1380.8	1380.8
		PICH	3	2379.9			PICH	4263.5	3264.4	3264.4
		BLM	4	7724.5			PICH	4430.2	3431.1	3431.1
		PICH	5	4263.5			PICH	3664.5	2665.4	2665.4
		BLM	6	8850.1			PICH	5561.7	4562.6	4562.6
		PICH	7	4430.2			PICH	5015.1	4016	4016
		BLM	8	8846.3			PICH	5311.7	4312.6	4312.6
		PICH	9	3664.5			PICH	4582.8	3583.7	3583.7
		BLM	10	9821.5			PICH	4167.3	3168.2	3168.2
		PICH	11	5561.7			PICH	3438.5	2439.4	2439.4
		BLM	12	10875.5			PICH	4364.6	3365.5	3365.5
		PICH	13	5015.1			BLM	9798.3
		BLM	14	11185			BLM	7724.5	-2073.8	0
		PICH	15	5311.7			BLM	8850.1	-948.2	0
		BLM	16	10051.5			BLM	8846.3	-952	0
		PICH	17	4582.8			BLM	9821.5	23.2	23.2
		BLM	18	9715			BLM	10875.5	1077.2	1077.2
		PICH	19	4167.3			BLM	11185	1386.7	1386.7
		BLM	20	9601.3			BLM	10051.5	253.2	253.2
		PICH	21	3438.5			BLM	9715	-83.3	0
		BLM	22	8778.9			BLM	9601.3	-197	0
		PICH	23	4364.6			BLM	8778.9	-1019.4	0
		BLM	24	10466.1			BLM	10466.1	667.8	667.8
	deltaBLM + GFP-BLM-NN_ICRF_GFP-PICH-CEN-33 mid ana.czi
		PICH	1	1228.2			PICH	1228.2
		BLM	2	4340.2			PICH	3663.6	2435.4	2435.4
		PICH	3	3663.6			PICH	3861.8	2633.6	2633.6
		BLM	4	4320.8			PICH	3779.2	2551	2551
		PICH	5	3861.8			PICH	3441.6	2213.4	2213.4
		BLM	6	4666.6			PICH	3665	2436.8	2436.8
		PICH	7	3779.2			PICH	3492.9	2264.7	2264.7
		BLM	8	5018.5			BLM	4340.2
		PICH	9	3441.6			BLM	4320.8	-19.4	0
		BLM	10	4537.4			BLM	4666.6	326.4	326.4
		PICH	11	3665			BLM	5018.5	678.3	678.3
		BLM	12	4648.8			BLM	4537.4	197.2	197.2
		PICH	13	3492.9			BLM	4648.8	308.6	308.6
		BLM	14	4251.5			BLM	4251.5	-88.7	0
	deltaBLM + GFP-BLM-NN_ICRF_GFP-PICH-CEN-31 metaphase-like.czi
		PICH	1	1666.9			PICH	1666.9
		BLM	2	5325.8			PICH	3639.6	1972.7	1972.7
		PICH	3	3639.6			PICH	2813.3	1146.4	1146.4
		BLM	4	4313.4			PICH	4401.3	2734.4	2734.4
		PICH	5	2813.3			PICH	3914.9	2248	2248
		BLM	6	4490			PICH	3620.8	1953.9	1953.9
		PICH	7	4401.3			PICH	3342.8	1675.9	1675.9
		BLM	8	5509.5			PICH	3574.4	1907.5	1907.5
		PICH	9	3914.9			PICH	3476.5	1809.6	1809.6
		BLM	10	4665.7			PICH	3419.6	1752.7	1752.7
		PICH	11	3620.8			PICH	4043.8	2376.9	2376.9
		BLM	12	4881.5			PICH	4098.4	2431.5	2431.5
		PICH	13	3342.8			PICH	3906.9	2240	2240
		BLM	14	5567.7			BLM	5325.8
		PICH	15	3574.4			BLM	4313.4	-1012.4	0
		BLM	16	5580.4			BLM	4490	-835.8	0
		PICH	17	3476.5			BLM	5509.5	183.7	183.7
		BLM	18	5105.9			BLM	4665.7	-660.1	0
		PICH	19	3419.6			BLM	4881.5	-444.3	0
		BLM	20	4613.5			BLM	5567.7	241.9	241.9
		PICH	21	4043.8			BLM	5580.4	254.6	254.6
		BLM	22	4513.5			BLM	5105.9	-219.9	0
		PICH	23	4098.4			BLM	4613.5	-712.3	0
		BLM	24	4542.1			BLM	4513.5	-812.3	0
		PICH	25	3906.9			BLM	4542.1	-783.7	0
		BLM	26	5090.9			BLM	5090.9	-234.9	0
	deltaBLM + GFP-BLM-NN_ICRF_GFP-PICH-CEN-30 mid ana.czi
		PICH	1	1167.5			PICH	1167.5
		BLM	2	11467.6			PICH	5125	3957.5	3957.5
		PICH	3	5125			PICH	6953.8	5786.3	5786.3
		BLM	4	12214.1			PICH	7646.7	6479.2	6479.2
		PICH	5	6953.8			PICH	5870.8	4703.3	4703.3
		BLM	6	12443.7			PICH	6130.6	4963.1	4963.1
		PICH	7	7646.7			PICH	4727.9	3560.4	3560.4
		BLM	8	13583.8			BLM	11467.6
		PICH	9	5870.8			BLM	12214.1	746.5	746.5
		BLM	10	12582.4			BLM	12443.7	976.1	976.1
		PICH	11	6130.6			BLM	13583.8	2116.2	2116.2
		BLM	12	13510.4			BLM	12582.4	1114.8	1114.8
		PICH	13	4727.9			BLM	13510.4	2042.8	2042.8
		BLM	14	12202.3			BLM	12202.3	734.7	734.7
	deltaBLM + GFP-BLM-NN_ICRF_GFP-PICH-CEN-29 early ana.czi
		PICH	1	1484			PICH	1484
		BLM	2	7359.6			PICH	5934.1	4450.1	4450.1
		PICH	3	5934.1			PICH	4843.1	3359.1	3359.1
		BLM	4	8827.9			PICH	6190.8	4706.8	4706.8
		PICH	5	4843.1			PICH	3795.4	2311.4	2311.4
		BLM	6	8428			PICH	4509.5	3025.5	3025.5
		PICH	7	6190.8			PICH	4876.8	3392.8	3392.8
		BLM	8	8666			PICH	5714.2	4230.2	4230.2
		PICH	9	3795.4			BLM	7359.6
		BLM	10	8492.6			BLM	8827.9	1468.3	1468.3
		PICH	11	4509.5			BLM	8428	1068.4	1068.4
		BLM	12	8010			BLM	8666	1306.4	1306.4
		PICH	13	4876.8			BLM	8492.6	1133	1133
		BLM	14	7971.3			BLM	8010	650.4	650.4
		PICH	15	5714.2			BLM	7971.3	611.7	611.7
		BLM	16	8347.5			BLM	8347.5	987.9	987.9
	deltaBLM + GFP-BLM-NN_ICRF_GFP-PICH-CEN-28 early ana.czi
		PICH	1	1122.8			PICH	1122.8
		BLM	2	5279.5			PICH	3979	2856.2	2856.2
		PICH	3	3979			PICH	4552	3429.2	3429.2
		BLM	4	5700.4			PICH	5186.5	4063.7	4063.7
		PICH	5	4552			PICH	5085.7	3962.9	3962.9
		BLM	6	6300.5			PICH	3740.9	2618.1	2618.1
		PICH	7	5186.5			PICH	4145.2	3022.4	3022.4
		BLM	8	6189.5			PICH	4921.7	3798.9	3798.9
		PICH	9	5085.7			PICH	4056.9	2934.1	2934.1
		BLM	10	6895.1			BLM	5279.5
		PICH	11	3740.9			BLM	5700.4	420.9	420.9
		BLM	12	6209			BLM	6300.5	1021	1021
		PICH	13	4145.2			BLM	6189.5	910	910
		BLM	14	7310.5			BLM	6895.1	1615.6	1615.6
		PICH	15	4921.7			BLM	6209	929.5	929.5
		BLM	16	6518.2			BLM	7310.5	2031	2031
		PICH	17	4056.9			BLM	6518.2	1238.7	1238.7
		BLM	18	6348.1			BLM	6348.1	1068.6	1068.6
	deltaBLM + GFP-BLM-NN_ICRF_GFP-PICH-CEN-26 ana-like.czi
		PICH	1	1440.4			PICH	1440.4
		BLM	2	8469.8			PICH	6129.5	4689.1	4689.1
		PICH	3	6129.5			PICH	6330.2	4889.8	4889.8
		BLM	4	8904.6			PICH	8547.3	7106.9	7106.9
		PICH	5	6330.2			PICH	5242.4	3802	3802
		BLM	6	9168.8			PICH	7061.9	5621.5	5621.5
		PICH	7	8547.3			PICH	6653.5	5213.1	5213.1
		BLM	8	8285.6			PICH	6420.6	4980.2	4980.2
		PICH	9	5242.4			PICH	8379.8	6939.4	6939.4
		BLM	10	7992.6			PICH	4729	3288.6	3288.6
		PICH	11	7061.9			PICH	4926.9	3486.5	3486.5
		BLM	12	9618.3			PICH	5286.1	3845.7	3845.7
		PICH	13	6653.5			PICH	3513.4	2073	2073
		BLM	14	9206.9			PICH	6892.4	5452	5452
		PICH	15	6420.6			BLM	8469.8
		BLM	16	8647.5			BLM	8904.6	434.8	434.8
		PICH	17	8379.8			BLM	9168.8	699	699
		BLM	18	8665.7			BLM	8285.6	-184.2	0
		PICH	19	4729			BLM	7992.6	-477.2	0
		BLM	20	7863.8			BLM	9618.3	1148.5	1148.5
		PICH	21	4926.9			BLM	9206.9	737.1	737.1
		BLM	22	8654.9			BLM	8647.5	177.7	177.7
		PICH	23	5286.1			BLM	8665.7	195.9	195.9
		BLM	24	8946			BLM	7863.8	-606	0
		PICH	25	3513.4			BLM	8654.9	185.1	185.1
		BLM	26	7284.8			BLM	8946	476.2	476.2
		PICH	27	6892.4			BLM	7284.8	-1185	0
		BLM	28	8703.5			BLM	8703.5	233.7	233.7
	deltaBLM + GFP-BLM-NN_ICRF_GFP-PICH-CEN-25 early ana.czi
		PICH	1	1692.6			PICH	1692.6
		BLM	2	5753.4			PICH	6309.1	4616.5	4616.5
		PICH	3	6309.1			PICH	6511.2	4818.6	4818.6
		BLM	4	6146.2			PICH	6041.3	4348.7	4348.7
		PICH	5	6511.2			PICH	6340	4647.4	4647.4
		BLM	6	6329.3			PICH	5512.3	3819.7	3819.7
		PICH	7	6041.3			PICH	4255.1	2562.5	2562.5
		BLM	8	5897.5			PICH	6361.1	4668.5	4668.5
		PICH	9	6340			BLM	5753.4
		BLM	10	6305.4			BLM	6146.2	392.8	392.8
		PICH	11	5512.3			BLM	6329.3	575.9	575.9
		BLM	12	6185			BLM	5897.5	144.1	144.1
		PICH	13	4255.1			BLM	6305.4	552	552
		BLM	14	5451.1			BLM	6185	431.6	431.6
		PICH	15	6361.1			BLM	5451.1	-302.3	0
		BLM	16	6555.4			BLM	6555.4	802	802
	deltaBLM + GFP-BLM-NN_ICRF_GFP-PICH-CEN-24 ana-like.czi
		PICH	1	1175.9			PICH	1175.9
		BLM	2	8280.7			PICH	3621.7	2445.8	2445.8
		PICH	3	3621.7			PICH	5722.4	4546.5	4546.5
		BLM	4	7010.2			PICH	6592.2	5416.3	5416.3
		PICH	5	5722.4			PICH	4938.5	3762.6	3762.6
		BLM	6	9182.4			PICH	4866.5	3690.6	3690.6
		PICH	7	6592.2			PICH	4760.5	3584.6	3584.6
		BLM	8	9646.7			BLM	8280.7
		PICH	9	4938.5			BLM	7010.2	-1270.5	0
		BLM	10	8868.6			BLM	9182.4	901.7	901.7
		PICH	11	4866.5			BLM	9646.7	1366	1366
		BLM	12	8185.1			BLM	8868.6	587.9	587.9
		PICH	13	4760.5			BLM	8185.1	-95.6	0
		BLM	14	8544.6			BLM	8544.6	263.9	263.9
	deltaBLM + GFP-BLM-NN_ICRF_GFP-PICH-CEN-23 early ana.czi
		PICH	1	1600.3			PICH	1600.3
		BLM	2	8586.8			PICH	3005.6	1405.3	1405.3
		PICH	3	3005.6			PICH	2516.9	916.6	916.6
		BLM	4	8256.8			PICH	4313.8	2713.5	2713.5
		PICH	5	2516.9			PICH	5042.4	3442.1	3442.1
		BLM	6	7675			PICH	3704.4	2104.1	2104.1
		PICH	7	4313.8			PICH	4968.1	3367.8	3367.8
		BLM	8	8944.3			PICH	4557.3	2957	2957
		PICH	9	5042.4			PICH	4538.8	2938.5	2938.5
		BLM	10	9435			PICH	4469.8	2869.5	2869.5
		PICH	11	3704.4			BLM	8586.8
		BLM	12	9031.8			BLM	8256.8	-330	0
		PICH	13	4968.1			BLM	7675	-911.8	0
		BLM	14	9386.4			BLM	8944.3	357.5	357.5
		PICH	15	4557.3			BLM	9435	848.2	848.2
		BLM	16	9638.2			BLM	9031.8	445	445
		PICH	17	4538.8			BLM	9386.4	799.6	799.6
		BLM	18	8501.5			BLM	9638.2	1051.4	1051.4
		PICH	19	4469.8			BLM	8501.5	-85.3	0
		BLM	20	8398.8			BLM	8398.8	-188	0
	deltaBLM + GFP-BLM-NN_ICRF_GFP-PICH-CEN-22 mid ana.czi
		PICH	1	1885.7			PICH	1885.7
		BLM	2	6048.3			PICH	3863.5	1977.8	1977.8
		PICH	3	3863.5			PICH	3136.8	1251.1	1251.1
		BLM	4	6321.2			PICH	3903.9	2018.2	2018.2
		PICH	5	3136.8			BLM	6048.3
		BLM	6	5996.2			BLM	6321.2	272.9	272.9
		PICH	7	3903.9			BLM	5996.2	-52.1	0
		BLM	8	6479.2			BLM	6479.2	430.9	430.9
	deltaBLM + GFP-BLM-NN_ICRF_GFP-PICH-CEN-20 ana-like.czi
		PICH	1	1543.5			PICH	1543.5
		BLM	2	14651.7			PICH	3160.6	1617.1	1617.1
		PICH	3	3160.6			PICH	3832.8	2289.3	2289.3
		BLM	4	14369.5			PICH	3628.4	2084.9	2084.9
		PICH	5	3832.8			PICH	3959.3	2415.8	2415.8
		BLM	6	15855.9			PICH	3876.1	2332.6	2332.6
		PICH	7	3628.4			BLM	14651.7
		BLM	8	15554.8			BLM	14369.5	-282.2	0
		PICH	9	3959.3			BLM	15855.9	1204.2	1204.2
		BLM	10	15886.7			BLM	15554.8	903.1	903.1
		PICH	11	3876.1			BLM	15886.7	1235	1235
		BLM	12	12821.1			BLM	12821.1	-1830.6	0
	deltaBLM + GFP-BLM-NN_ICRF_GFP-PICH-CEN-19 late ana.czi
		PICH	1	1985.2			PICH	1985.2
		BLM	2	7565.4			PICH	5324.1	3338.9	3338.9
		PICH	3	5324.1			PICH	5412.4	3427.2	3427.2
		BLM	4	8338.4			PICH	4369	2383.8	2383.8
		PICH	5	5412.4			PICH	4274.4	2289.2	2289.2
		BLM	6	8393.6			BLM	7565.4
		PICH	7	4369			BLM	8338.4	773	773
		BLM	8	7783.5			BLM	8393.6	828.2	828.2
		PICH	9	4274.4			BLM	7783.5	218.1	218.1
		BLM	10	8432.6			BLM	8432.6	867.2	867.2
	deltaBLM + GFP-BLM-NN_ICRF_GFP-PICH-CEN-16 early ana.czi
		PICH	1	1948.1			PICH	1948.1
		BLM	2	10196.2			PICH	3423.8	1475.7	1475.7
		PICH	3	3423.8			PICH	3951.7	2003.6	2003.6
		BLM	4	8903.6			PICH	5722.6	3774.5	3774.5
		PICH	5	3951.7			PICH	5716.2	3768.1	3768.1
		BLM	6	10123			PICH	3474.8	1526.7	1526.7
		PICH	7	5722.6			PICH	3282	1333.9	1333.9
		BLM	8	11741.3			BLM	10196.2
		PICH	9	5716.2			BLM	8903.6	-1292.6	0
		BLM	10	10945			BLM	10123	-73.2	0
		PICH	11	3474.8			BLM	11741.3	1545.1	1545.1
		BLM	12	12265.9			BLM	10945	748.8	748.8
		PICH	13	3282			BLM	12265.9	2069.7	2069.7
		BLM	14	9173.2			BLM	9173.2	-1023	0
	deltaBLM + GFP-BLM-NN_ICRF_GFP-PICH-CEN-15 mid ana.czi
		PICH	1	1852.1			PICH	1852.1
		BLM	2	5578.2			PICH	3682.1	1830	1830
		PICH	3	3682.1			PICH	4486.3	2634.2	2634.2
		BLM	4	5489.6			PICH	4341.8	2489.7	2489.7
		PICH	5	4486.3			PICH	6167.5	4315.4	4315.4
		BLM	6	5454.3			PICH	5859.5	4007.4	4007.4
		PICH	7	4341.8			PICH	5507.8	3655.7	3655.7
		BLM	8	5690.1			PICH	6718.4	4866.3	4866.3
		PICH	9	6167.5			BLM	5578.2
		BLM	10	5765.5			BLM	5489.6	-88.6	0
		PICH	11	5859.5			BLM	5454.3	-123.9	0
		BLM	12	5372.4			BLM	5690.1	111.9	111.9
		PICH	13	5507.8			BLM	5765.5	187.3	187.3
		BLM	14	5651.5			BLM	5372.4	-205.8	0
		PICH	15	6718.4			BLM	5651.5	73.3	73.3
		BLM	16	5932.5			BLM	5932.5	354.3	354.3
	deltaBLM + GFP-BLM-NN_ICRF_GFP-PICH-CEN-14 ana-like.czi
		PICH	1	1782.9			PICH	1782.9
		BLM	2	10503.2			PICH	4290.3	2507.4	2507.4
		PICH	3	4290.3			PICH	4161.6	2378.7	2378.7
		BLM	4	10434.3			PICH	4957.6	3174.7	3174.7
		PICH	5	4161.6			PICH	5972.3	4189.4	4189.4
		BLM	6	10717.2			PICH	4959.6	3176.7	3176.7
		PICH	7	4957.6			PICH	3969.2	2186.3	2186.3
		BLM	8	11422.1			PICH	4646.8	2863.9	2863.9
		PICH	9	5972.3			PICH	4413.6	2630.7	2630.7
		BLM	10	11618.8			PICH	4808.3	3025.4	3025.4
		PICH	11	4959.6			BLM	10503.2
		BLM	12	9822.4			BLM	10434.3	-68.9	0
		PICH	13	3969.2			BLM	10717.2	214	214
		BLM	14	10388			BLM	11422.1	918.9	918.9
		PICH	15	4646.8			BLM	11618.8	1115.6	1115.6
		BLM	16	10220.3			BLM	9822.4	-680.8	0
		PICH	17	4413.6			BLM	10388	-115.2	0
		BLM	18	10176			BLM	10220.3	-282.9	0
		PICH	19	4808.3			BLM	10176	-327.2	0
		BLM	20	10598.1			BLM	10598.1	94.9	94.9
	deltaBLM + GFP-BLM-NN_ICRF_GFP-PICH-CEN-12 early ana.czi
		PICH	1	1881.7			PICH	1881.7
		BLM	2	3303.7			PICH	4633.6	2751.9	2751.9
		PICH	3	4633.6			PICH	5051.9	3170.2	3170.2
		BLM	4	3364.4			PICH	7596	5714.3	5714.3
		PICH	5	5051.9			PICH	6777.3	4895.6	4895.6
		BLM	6	3295.1			PICH	4024.2	2142.5	2142.5
		PICH	7	7596			PICH	5208.8	3327.1	3327.1
		BLM	8	3345			PICH	6769.4	4887.7	4887.7
		PICH	9	6777.3			PICH	5890.1	4008.4	4008.4
		BLM	10	3524.1			BLM	3303.7
		PICH	11	4024.2			BLM	3364.4	60.7	60.7
		BLM	12	3358.7			BLM	3295.1	-8.6	0
		PICH	13	5208.8			BLM	3345	41.3	41.3
		BLM	14	3422.1			BLM	3524.1	220.4	220.4
		PICH	15	6769.4			BLM	3358.7	55	55
		BLM	16	3146			BLM	3422.1	118.4	118.4
		PICH	17	5890.1			BLM	3146	-157.7	0
		BLM	18	3415.4			BLM	3415.4	111.7	111.7
	deltaBLM + GFP-BLM-NN_ICRF_GFP-PICH-CEN-11 early ana.czi
		PICH	1	1338.8			PICH	1338.8
		BLM	2	16194.3			PICH	4267	2928.2	2928.2
		PICH	3	4267			PICH	3672.2	2333.4	2333.4
		BLM	4	17702.7			PICH	3545.3	2206.5	2206.5
		PICH	5	3672.2			PICH	3530.8	2192	2192
		BLM	6	15425.9			PICH	3421.9	2083.1	2083.1
		PICH	7	3545.3			PICH	3198.6	1859.8	1859.8
		BLM	8	16876.2			BLM	16194.3
		PICH	9	3530.8			BLM	17702.7	1508.4	1508.4
		BLM	10	17588.7			BLM	15425.9	-768.4	0
		PICH	11	3421.9			BLM	16876.2	681.9	681.9
		BLM	12	16398.7			BLM	17588.7	1394.4	1394.4
		PICH	13	3198.6			BLM	16398.7	204.4	204.4
		BLM	14	16031			BLM	16031	-163.3	0
	deltaBLM + GFP-BLM-NN_ICRF_GFP-PICH-CEN-10 early ana.czi
		PICH	1	1975.1			PICH	1975.1
		BLM	2	11431.3			PICH	6948.7	4973.6	4973.6
		PICH	3	6948.7			PICH	4722.7	2747.6	2747.6
		BLM	4	11767.1			PICH	7343.6	5368.5	5368.5
		PICH	5	4722.7			PICH	7249.4	5274.3	5274.3
		BLM	6	10348.9			PICH	6786.1	4811	4811
		PICH	7	7343.6			PICH	4926.6	2951.5	2951.5
		BLM	8	12748.1			PICH	5906.2	3931.1	3931.1
		PICH	9	7249.4			PICH	5917.3	3942.2	3942.2
		BLM	10	12352.2			BLM	11431.3
		PICH	11	6786.1			BLM	11767.1	335.8	335.8
		BLM	12	13089.6			BLM	10348.9	-1082.4	0
		PICH	13	4926.6			BLM	12748.1	1316.8	1316.8
		BLM	14	11147.2			BLM	12352.2	920.9	920.9
		PICH	15	5906.2			BLM	13089.6	1658.3	1658.3
		BLM	16	11782.2			BLM	11147.2	-284.1	0
		PICH	17	5917.3			BLM	11782.2	350.9	350.9
		BLM	18	11584			BLM	11584	152.7	152.7
	deltaBLM + GFP-BLM-NN_ICRF_GFP-PICH-CEN-05 ana-like.czi
		PICH	1	1758.1			PICH	1758.1
		BLM	2	8671.9			PICH	4171.5	2413.4	2413.4
		PICH	3	4171.5			PICH	4780.4	3022.3	3022.3
		BLM	4	9262.4			PICH	5098	3339.9	3339.9
		PICH	5	4780.4			PICH	9077.9	7319.8	7319.8
		BLM	6	9570			PICH	5980.1	4222	4222
		PICH	7	5098			PICH	6302.3	4544.2	4544.2
		BLM	8	9430.4			BLM	8671.9
		PICH	9	9077.9			BLM	9262.4	590.5	590.5
		BLM	10	10556.5			BLM	9570	898.1	898.1
		PICH	11	5980.1			BLM	9430.4	758.5	758.5
		BLM	12	9632.1			BLM	10556.5	1884.6	1884.6
		PICH	13	6302.3			BLM	9632.1	960.2	960.2
		BLM	14	9431.6			BLM	9431.6	759.7	759.7
	deltaBLM + GFP-BLM-NN_ICRF_GFP-PICH-CEN-04 mid ana.czi
		PICH	1	1947.5			PICH	1947.5
		BLM	2	12798.8			PICH	3125.3	1177.8	1177.8
		PICH	3	3125.3			PICH	4002.5	2055	2055
		BLM	4	10901.3			PICH	4280.6	2333.1	2333.1
		PICH	5	4002.5			PICH	3977.9	2030.4	2030.4
		BLM	6	12174.7			BLM	12798.8
		PICH	7	4280.6			BLM	10901.3	-1897.5	0
		BLM	8	12225.4			BLM	12174.7	-624.1	0
		PICH	9	3977.9			BLM	12225.4	-573.4	0
		BLM	10	13279.7			BLM	13279.7	480.9	480.9
	deltaBLM + GFP-BLM-NN_ICRF_GFP-PICH-CEN-02 ana-like.czi
		PICH	1	998.2			PICH	998.2
		BLM	2	4208.2			PICH	2135.6	1137.4	1137.4
		PICH	3	2135.6			PICH	2140.1	1141.9	1141.9
		BLM	4	3991.4			PICH	3385.2	2387	2387
		PICH	5	2140.1			PICH	2226.6	1228.4	1228.4
		BLM	6	4266.2			PICH	2546	1547.8	1547.8
		PICH	7	3385.2			BLM	4208.2
		BLM	8	4679.5			BLM	3991.4	-216.8	0
		PICH	9	2226.6			BLM	4266.2	58	58
		BLM	10	4249.6			BLM	4679.5	471.3	471.3
		PICH	11	2546			BLM	4249.6	41.4	41.4
		BLM	12	3921.4			BLM	3921.4	-286.8	0

## Sheet: Analysis combined
	WT			delta51			delta13			NN				Ratio BLM/PICH					Ratio BLM/PICH (0=0.0001)
	PICH	BLM	Ratio	PICH	BLM	Ratio	PICH	BLM	Ratio	PICH	BLM	Ratio		WT	∆51	∆13	N7A, N8A		WT	∆51	∆13	N7A, N8A
	2482	224.8	0.0905721	2294.5	729.8	0.318065	1323.3	0	0	4240.3	725	0.170978		0.0905721	0.318065	0	0.170978		0.0905721	0.318065	0.0001	0.170978
	2934.2	346.7	0.118158	1249.2	528.8	0.423311	2424.6	439.4	0.181226	3622.8	387.7	0.107017		0.118158	0.423311	0.181226	0.107017		0.118158	0.423311	0.181226	0.107017
	3086.7	698	0.226131	1776.2	383.7	0.216023	1995.8	1812.5	0.908157	7660	1790	0.233681		0.226131	0.216023	0.908157	0.233681		0.226131	0.216023	0.908157	0.233681
	2918.1	449.1	0.153902	691.6	0	0	2709.6	523.7	0.193276					0.153902	0	0.193276			0.153902	0.0001	0.193276
	3118.1	754.6	0.242006	1990.5	0	0	1527	0	0	4533.6	0	0		0.242006	0	0	0		0.242006	0.0001	0.0001	0.0001
	2903.9	436.5	0.150315	1025.1	0	0	2508.3	415.2	0.16553	5450	0	0		0.150315	0	0.16553	0		0.150315	0.0001	0.16553	0.0001
	2841.6	461.2	0.162303	3026.3	0	0	573.9	0	0	2721	0	0		0.162303	0	0	0		0.162303	0.0001	0.0001	0.0001
	1627.6	222.7	0.136827	3173.9	0	0	717	489.8	0.683124	5424.5	938.8	0.173067		0.136827	0	0.683124	0.173067		0.136827	0.0001	0.683124	0.173067
	1391.3	261.4	0.187882				2108.7	0	0	4908.8	0	0		0.187882		0	0		0.187882		0.0001	0.0001
	550.1	42.8	0.077804							5931.1	910	0.153429		0.077804			0.153429		0.077804			0.153429
	1644.1	326.1	0.198346	903.7	0	0	3152.7	0	0	6910.7	342.6	0.0495753		0.198346	0	0	0.0495753		0.198346	0.0001	0.0001	0.0495753
	1657.1	785.4	0.473961	441.7	0	0	3744.5	0	0	3797.6	0	0		0.473961	0	0	0		0.473961	0.0001	0.0001	0.0001
				1789.8	168.1	0.0939211	2854.2	1955.8	0.685236	5400.9	36.4	0.00673962			0.0939211	0.685236	0.00673962			0.0939211	0.685236	0.00673962
	2467.7	1726	0.699437	1381.2	215	0.155662	4079.1	995.7	0.244098					0.699437	0.155662	0.244098			0.699437	0.155662	0.244098
	878.6	680.2	0.774186	1983.4	223	0.112433	2718.3	1835	0.675054	2536	67.7	0.0266956		0.774186	0.112433	0.675054	0.0266956		0.774186	0.112433	0.675054	0.0266956
				802	27.6	0.034414	5384.1	0	0	2698.9	183.9	0.0681389			0.034414	0	0.0681389		0.0001	0.034414	0.0001	0.0681389
	2841.1	865.2	0.30453	409.4	223.3	0.545432	3138.4	1132.3	0.360789	3426.1	1010.2	0.294854		0.30453	0.545432	0.360789	0.294854		0.30453	0.545432	0.360789	0.294854
	1270.1	1227.4	0.966381	428.3	142.7	0.333178	2387.1	0	0	3274.3	396.6	0.121125		0.966381	0.333178	0	0.121125		0.966381	0.333178	0.0001	0.121125
	1956.6	27	0.0137994	305.6	0	0	2380.8	0	0	3359	1770.4	0.527062		0.0137994	0	0	0.527062		0.0137994	0.0001	0.0001	0.527062
	1209.3	649.9	0.537418	1242.5	0	0	1975.9	0	0	3395.1	2220	0.653884		0.537418	0	0	0.653884		0.537418	0.0001	0.0001	0.653884
	2396	1175	0.490401	2374.4	0	0				2478.5	460.8	0.185919		0.490401	0		0.185919		0.490401	0.0001		0.185919
	2282.7	1341.3	0.587594	2960.6	0	0	0			4064.6	1272.1	0.312971		0.587594	0		0.312971		0.587594	0.0001		0.312971
	2999.6	727.6	0.242566	1398.8	189.2	0.135259	3311.8	0	0	4382.9	998.9	0.227908		0.242566	0.135259	0	0.227908		0.242566	0.135259	0.0001	0.227908
	3292.2	1003.9	0.304933				3079.8	1661	0.539321					0.304933		0.539321			0.304933		0.539321
	1667.9	0	0	2126.3	0	0	4554.6	2092.3	0.459382	5705.6	322.3	0.0564884			0	0.459382	0.0564884			0.0001	0.459382	0.0564884
	3965.5	3058.8	0.771353	2655.3	79.8	0.0300531	3606.3	1216.8	0.33741	3238.5	0	0		0.771353	0.0300531	0.33741	0		0.771353	0.0300531	0.33741	0.0001
				1296.7	0	0	2836.9	1606.1	0.566146	7078.7	141.6	0.0200037			0	0.566146	0.0200037			0.0001	0.566146	0.0200037
	986.7	17.1	0.0173305	3426	460.7	0.134472	3799.3	1476.7	0.388677	5343.1	729.8	0.136587		0.0173305	0.134472	0.388677	0.136587		0.0173305	0.134472	0.388677	0.136587
	3477.2	736.2	0.211722	1384.8	65.6	0.0473715	2457.7	0	0	5608.7	508.4	0.0906449		0.211722	0.0473715	0	0.0906449		0.211722	0.0473715	0.0001	0.0906449
	3014.3	660.3	0.219056				1605.5	0	0	5951.3	0	0		0.219056		0	0		0.219056		0.0001	0.0001
	3156	965.9	0.306052	3179.8	293.5	0.0923014				3167	425.7	0.134417		0.306052	0.0923014		0.134417		0.306052	0.0923014		0.134417
	4545.7	1396.5	0.307213	4413.9	79.9	0.0181019	2560.1	0	0	3113.9	97.4	0.0312791		0.307213	0.0181019	0	0.0312791		0.307213	0.0181019	0.0001	0.0312791
	4171.2	1425	0.341628	2593.4	0	0	2704.3	0	0	4869.2	105.9	0.021749		0.341628	0	0	0.021749		0.341628	0.0001	0.0001	0.021749
	3186.2	1568.7	0.492342	2210.2	0	0	4316.7	330.6	0.0765863	4187.6	230.2	0.0549718		0.492342	0	0.0765863	0.0549718		0.492342	0.0001	0.0765863	0.0549718
	3738.8	1380.3	0.369183	1513.7	0	0	3054.7	0	0	4628.3	410.8	0.0887583		0.369183	0	0	0.0887583		0.369183	0.0001	0.0001	0.0887583
	2079.2	734.1	0.353068				2787.9	0	0	4304.2	0	0		0.353068		0	0		0.353068		0.0001	0.0001
	4271.4	1000.2	0.234162	2646	246.1	0.0930083	1786.9	0	0	5603.4	0	0		0.234162	0.0930083	0	0		0.234162	0.0930083	0.0001	0.0001
	1663.5	495.8	0.298046	1440.9	0	0	5257.5	973.9	0.18524	2991.2	0	0		0.298046	0	0.18524	0		0.298046	0.0001	0.18524	0.0001
	3633.9	443.8	0.122128	1270.9	0	0				3974.7	0	0		0.122128	0		0		0.122128	0.0001		0.0001
	2227.5	628.1	0.281975	3030.9	271	0.0894124	1585.9	419.1	0.264266	6595.3	0	0		0.281975	0.0894124	0.264266	0		0.281975	0.0894124	0.264266	0.0001
				3940.5	524.2	0.133029	2082.5	0	0						0.133029	0			0.0001	0.133029	0.0001
	2736.9	1695.1	0.61935	2708.4	1012.7	0.373911	1467.3	177.5	0.12097	3183.9	314.7	0.098841		0.61935	0.373911	0.12097	0.098841		0.61935	0.373911	0.12097	0.098841
	1326.1	855.1	0.644823	2817.2	244.1	0.0866463	2139.1	0	0	2259.3	291.8	0.129155		0.644823	0.0866463	0	0.129155		0.644823	0.0866463	0.0001	0.129155
	1500.6	0	0	1541.9	0	0	1047.5	0	0	2266.7	241.5	0.106543			0	0	0.106543			0.0001	0.0001	0.106543
	2203.3	689.6	0.312985	3068.4	129.1	0.042074	1188.5	0	0	1985.7	0	0		0.312985	0.042074	0	0		0.312985	0.042074	0.0001	0.0001
	2195.1	1423.4	0.648444	1694.9	157	0.0926308				1802.5	0	0		0.648444	0.0926308		0		0.648444	0.0926308		0.0001
	3284.5	2886.3	0.878764				1771.3	0	0	632.1	0	0		0.878764		0	0		0.878764		0.0001	0.0001
	3787.5	2036.5	0.53769	1721.6	0	0	2379.1	0	0					0.53769	0	0			0.53769	0.0001	0.0001
	4628.1	2631.5	0.568592	2084.1	0	0	3471.3	0	0	2146.3	0	0		0.568592	0	0	0		0.568592	0.0001	0.0001	0.0001
	2057.6	961.5	0.467292	2084.9	0	0	2351.5	335.3	0.14259	1831.6	0	0		0.467292	0	0.14259	0		0.467292	0.0001	0.14259	0.0001
	1778.1	1048.2	0.589506	4441.8	0	0	2878.9	0	0	2776.5	0	0		0.589506	0	0	0		0.589506	0.0001	0.0001	0.0001
	1208.4	272	0.225091	3971.1	209.3	0.0527058	1543.6	414.5	0.268528	3118.4	110.4	0.0354028		0.225091	0.0527058	0.268528	0.0354028		0.225091	0.0527058	0.268528	0.0354028
	4647	3104.9	0.668151	3064.8	28.1	0.00916862	3311.9	626.2	0.189076	1667	1328.9	0.797181		0.668151	0.00916862	0.189076	0.797181		0.668151	0.00916862	0.189076	0.797181
	808.8	759.8	0.939416	1733.1	63.9	0.0368703	2302.9	0	0	2222.4	0	0		0.939416	0.0368703	0	0		0.939416	0.0368703	0.0001	0.0001
	2266	1074.4	0.474139	1282.4	0	0	3296.4	0	0	2507.4	0	0		0.474139	0	0	0		0.474139	0.0001	0.0001	0.0001
	1583.1	658	0.41564	1169.8	0	0	2068.7	643.1	0.310872	2636.9	570.4	0.216315		0.41564	0	0.310872	0.216315		0.41564	0.0001	0.310872	0.216315
	842.4	0	0	3680.6	450.3	0.122344				1533	0	0		0	0.122344		0		0.0001	0.122344		0.0001
	1255.1	0	0	1811.3	0	0	1338.2	0	0					0	0	0			0.0001	0.0001	0.0001
							1790.8	0	0	2082.7	0	0				0	0				0.0001	0.0001
	1487.6	366.3	0.246236	2505	0	0	1333.5	0	0	3129.5	0	0		0.246236	0	0	0		0.246236	0.0001	0.0001	0.0001
	1932.9	1304.1	0.674686	5169	0	0	2181	719.7	0.329986	2709.5	0	0		0.674686	0	0.329986	0		0.674686	0.0001	0.329986	0.0001
				5953.8	166.7	0.0279989	2327.8	75.3	0.0323481	2210.7	0	0			0.0279989	0.0323481	0		0.0001	0.0279989	0.0323481	0.0001
	2313.5	1189.6	0.514199	3092.8	0	0	2184.8	0	0	2554.3	0	0		0.514199	0	0	0		0.514199	0.0001	0.0001	0.0001
	3704.9	364.7	0.0984372	3903.5	0	0	1510.3	285.2	0.188837	1388.4	0	0		0.0984372	0	0.188837	0		0.0984372	0.0001	0.188837	0.0001
	995.3	261.2	0.262433	3270.8	0	0	2777.3	0	0	1592.4	0	0		0.262433	0	0	0		0.262433	0.0001	0.0001	0.0001
				1972.8	273.8	0.138788	1366.3	0	0	2522.1	0	0			0.138788	0	0		0.0001	0.138788	0.0001	0.0001
	1648.3	1022	0.620033	2810.2	141.1	0.0502099				3947.2	0	0		0.620033	0.0502099		0		0.620033	0.0502099		0.0001
	1656.4	1861.3	1.1237	2887.6	0	0	2165.9	504.5	0.232929					1.1237	0	0.232929			1.1237	0.0001	0.232929
	2059	1735.7	0.842982	1595.2	0	0	2318.8	1197.6	0.516474	2840.6	348.2	0.12258		0.842982	0	0.516474	0.12258		0.842982	0.0001	0.516474	0.12258
				4189.2	101.1	0.0241335	2317.7	798.9	0.344695	4387.7	0	0			0.0241335	0.344695	0		0.0001	0.0241335	0.344695	0.0001
	870.7	334.9	0.384633				3438.5	459.3	0.133576	4280.3	85.4	0.0199519		0.384633		0.133576	0.0199519		0.384633		0.133576	0.0199519
	1705.7	734	0.430322	5421	941.8	0.173732	3325.6	125.6	0.0377676	4047.5	38.7	0.00956146		0.430322	0.173732	0.0377676	0.00956146		0.430322	0.173732	0.0377676	0.00956146
	2091	1715.6	0.820469	4758.2	744	0.156362	4153	723.7	0.17426	3095.9	0	0		0.820469	0.156362	0.17426	0		0.820469	0.156362	0.17426	0.0001
	2042	1683.1	0.824241	2109.8	477.4	0.226277	2961	1331.5	0.449679	1742.5	0	0		0.824241	0.226277	0.449679	0		0.824241	0.226277	0.449679	0.0001
	1795	338.8	0.188747	8014.1	974	0.121536				3594.5	0	0		0.188747	0.121536		0		0.188747	0.121536		0.0001
	1530.9	1080.9	0.706055	2826.1	198.7	0.0703089	3116.8	151	0.0484471	4340.1	0	0		0.706055	0.0703089	0.0484471	0		0.706055	0.0703089	0.0484471	0.0001
	2797.6	1155.7	0.413104	3751	203.8	0.0543322	2144.6	0	0	1555.1	0	0		0.413104	0.0543322	0	0		0.413104	0.0543322	0.0001	0.0001
	2076	2433	1.17197	1422.5	254.8	0.179121								1.17197	0.179121				1.17197	0.179121
	1470.7	478.5	0.325355				1925.3	0	0	7941.8	602.1	0.075814		0.325355		0	0.075814		0.325355		0.0001	0.075814
	643.7	176.1	0.273575	843.6	0	0	1934.3	96.4	0.0498372	6474.1	233.6	0.0360822		0.273575	0	0.0498372	0.0360822		0.273575	0.0001	0.0498372	0.0360822
	2229.6	3057	1.3711	1590.5	0	0	2949.8	577.9	0.195912	5618.3	372.2	0.0662478		1.3711	0	0.195912	0.0662478		1.3711	0.0001	0.195912	0.0662478
	1111.5	1797.9	1.61754	2229	0	0	3141.2	777.6	0.247549	5625.6	241.6	0.0429465		1.61754	0	0.247549	0.0429465		1.61754	0.0001	0.247549	0.0429465
				1041.4	0	0	2468.8	1092.4	0.442482	7232.8	295.9	0.0409109			0	0.442482	0.0409109			0.0001	0.442482	0.0409109
	1277.5	524.7	0.410724	1263.8	117.7	0.0931318	5671.7	745.5	0.131442	8199.2	174.8	0.0213192		0.410724	0.0931318	0.131442	0.0213192		0.410724	0.0931318	0.131442	0.0213192
	2384.2	2366.2	0.99245	2047.9	0	0	2663.9	0	0	6744.1	0	0		0.99245	0	0	0		0.99245	0.0001	0.0001	0.0001
	1944.3	2291.2	1.17842	1811	0	0				6535.4	0	0		1.17842	0		0		1.17842	0.0001		0.0001
	1628	2016.1	1.23839	584.5	82.1	0.140462	1149.5	0	0	1460.3	0	0		1.23839	0.140462	0	0		1.23839	0.140462	0.0001	0.0001
	2296.1	2338.7	1.01855				3366.7	0	0	5645.3	78	0.0138168		1.01855		0	0.0138168		1.01855		0.0001	0.0138168
	1297.7	3049.4	2.34985	2000.8	0	0	1881.6	2181.2	1.15923					2.34985	0	1.15923			2.34985	0.0001	1.15923
	1615.6	2996.3	1.85461	2154.4	633.2	0.29391	1605.7	0	0	2187.1	744.4	0.340359		1.85461	0.29391	0	0.340359		1.85461	0.29391	0.0001	0.340359
	964.8	2080.3	2.1562	1535.9	0	0	2287.9	1080.8	0.472398	2784.8	357.2	0.128268		2.1562	0	0.472398	0.128268		2.1562	0.0001	0.472398	0.128268
				2197.6	309.3	0.140744	2014.8	0	0	3181.1	0	0			0.140744	0	0			0.140744	0.0001	0.0001
	1545.7	633.2	0.409653	1310	0	0	2244.3	0	0	2231.2	0	0		0.409653	0	0	0		0.409653	0.0001	0.0001	0.0001
	882.5	742.4	0.841246	987.4	0	0				4500.7	1441	0.320172		0.841246	0		0.320172		0.841246	0.0001		0.320172
	1016.9	1068.3	1.05055	589.8	0	0	1366.4	0	0	3940.2	1438.8	0.365159		1.05055	0	0	0.365159		1.05055	0.0001	0.0001	0.365159
	1694	1215.4	0.717473				2920.7	0	0	2622.1	180.5	0.068838		0.717473		0	0.068838		0.717473		0.0001	0.068838
	2094.8	1659.3	0.792104	1268.6	0	0	2148.6	0	0	2725.9	0	0		0.792104	0	0	0		0.792104	0.0001	0.0001	0.0001
	1219.5	962.2	0.789012	1723.4	0	0	3220.4	0	0	3324.3	810.9	0.243931		0.789012	0	0	0.243931		0.789012	0.0001	0.0001	0.243931
	1766.9	1955.5	1.10674	1652.7	47.5	0.0287408	3210.9	1081.4	0.33679					1.10674	0.0287408	0.33679			1.10674	0.0287408	0.33679
	1093.7	1882.2	1.72095	2789.2	270.4	0.0969454	2271.1	1249.7	0.550262	3528.1	393.3	0.111476		1.72095	0.0969454	0.550262	0.111476		1.72095	0.0969454	0.550262	0.111476
	1267.8	2000.3	1.57777	3542	72.3	0.0204122	3434.1	0	0	2741.2	179.5	0.0654823		1.57777	0.0204122	0	0.0654823		1.57777	0.0204122	0.0001	0.0654823
	506.8	948.1	1.87076	4563.3	241.8	0.052988	1698.4	0	0	3826.6	323.5	0.0845398		1.87076	0.052988	0	0.0845398		1.87076	0.052988	0.0001	0.0845398
				1954.6	0	0	1903.4	1303.2	0.68467	5548.8	349.7	0.0630226			0	0.68467	0.0630226			0.0001	0.68467	0.0630226
	1768.2	1477.9	0.835822	796	0	0				6542.9	333.4	0.050956		0.835822	0		0.050956		0.835822	0.0001		0.050956
	388.3	1301.6	3.35205	4205.8	57.6	0.0136954	4659.8	1633.2	0.350487	6721.8	186.2	0.0277009		3.35205	0.0136954	0.350487	0.0277009		3.35205	0.0136954	0.350487	0.0277009
	1691.3	1040.4	0.615148	2855.6	135.2	0.0473456	3010.3	1151.2	0.38242	7151.2	254.7	0.0356164		0.615148	0.0473456	0.38242	0.0356164		0.615148	0.0473456	0.38242	0.0356164
	1970.7	1318.8	0.669204				1382	0	0	5515.4	131.3	0.0238061		0.669204		0	0.0238061		0.669204		0.0001	0.0238061
	1645.9	1681.5	1.02163	1341.3	0	0	2533.4	628.2	0.247967	8102.1	259.8	0.0320658		1.02163	0	0.247967	0.0320658		1.02163	0.0001	0.247967	0.0320658
	1552.8	1910.3	1.23023	2454.1	0	0	3407.3	823.9	0.241804	5554.2	127.1	0.0228836		1.23023	0	0.241804	0.0228836		1.23023	0.0001	0.241804	0.0228836
	1121.4	1917.5	1.70992	1372.4	0	0	3291	952.5	0.289426	7240.1	20.4	0.00281764		1.70992	0	0.289426	0.00281764		1.70992	0.0001	0.289426	0.00281764
	1925.4	2554.4	1.32669	1650.4	39.4	0.023873	3453.2	592.9	0.171696	5588.8	61.8	0.0110578		1.32669	0.023873	0.171696	0.0110578		1.32669	0.023873	0.171696	0.0110578
				1571.4	27.6	0.017564				4820.3	0	0			0.017564		0			0.017564		0.0001
				2142.3	399.7	0.186575	2271.4	791.7	0.348552	5603.2	122.4	0.0218447			0.186575	0.348552	0.0218447			0.186575	0.348552	0.0218447
	767.8	802.3	1.04493	2806.6	0	0	1923.9	1275.3	0.662872					1.04493	0	0.662872			1.04493	0.0001	0.662872
	1057.9	696.8	0.658663	2583.2	0	0	1980.7	0	0	2494.2	0	0		0.658663	0	0	0		0.658663	0.0001	0.0001	0.0001
	875	890.4	1.0176	2151.9	0	0	1421.6	0	0	2629.9	0	0		1.0176	0	0	0		1.0176	0.0001	0.0001	0.0001
	1553	532.8	0.343078	2404.9	233.2	0.0969687	2082	0	0	3185.6	295.4	0.0927298		0.343078	0.0969687	0	0.0927298		0.343078	0.0969687	0.0001	0.0927298
	1381.2	815.7	0.590573				1949	1091.8	0.560185	2124.1	250.5	0.117932		0.590573		0.560185	0.117932		0.590573		0.560185	0.117932
	2559.4	900.2	0.351723	1624	0	0				2040.8	177.9	0.0871717		0.351723	0		0.0871717		0.351723	0.0001		0.0871717
	1752	204.3	0.11661	2811.3	0	0	1524	61.6	0.0404199	3043.6	0	0		0.11661	0	0.0404199	0		0.11661	0.0001	0.0404199	0.0001
				4826.8	536.4	0.11113	1442.5	566.6	0.39279	2237.8	0	0			0.11113	0.39279	0			0.11113	0.39279	0.0001
	933.6	0	0	4991.2	212.6	0.042595	2692.9	850.8	0.315942	1670	337.9	0.202335		0	0.042595	0.315942	0.202335		0.0001	0.042595	0.315942	0.202335
	1548.4	0	0	2793	675.2	0.241747	2229.5	1030.5	0.462211	3353.9	337	0.10048		0	0.241747	0.462211	0.10048		0.0001	0.241747	0.462211	0.10048
	2659.3	303.6	0.114165	2819.1	0	0	1441.8	81.1	0.0562491					0.114165	0	0.0562491			0.114165	0.0001	0.0562491
	2925.1	1967.6	0.672661	1194.2	0	0	2002.3	361.2	0.180393	6129.8	59.2	0.00965774		0.672661	0	0.180393	0.00965774		0.672661	0.0001	0.180393	0.00965774
	2616.7	1599.4	0.611228	3415.1	170.4	0.049896	2094.6	461.4	0.220281	4761.3	2.4	0.000504064		0.611228	0.049896	0.220281	0.000504064		0.611228	0.049896	0.220281	0.000504064
	3030.1	608.9	0.20095	3874.8	0.8	0.000206462				4783.6	230.7	0.0482273		0.20095	0.000206462		0.0482273		0.20095	0.000206462		0.0482273
	3678.3	1296.5	0.352473				2095.3	0	0	4475.5	0	0		0.352473		0	0		0.352473		0.0001	0.0001
	2835.7	2716.3	0.957894	5012.4	0	0	2145.8	0	0	5121	85.5	0.016696		0.957894	0	0	0.016696		0.957894	0.0001	0.0001	0.016696
	4770.8	1619.4	0.33944	2843.8	0	0	1551.7	317	0.204292	3563.2	688.1	0.193113		0.33944	0	0.204292	0.193113		0.33944	0.0001	0.204292	0.193113
	3816.1	1506.1	0.39467	2182.8	0	0	1431.7	183.5	0.128169	4506.3	0	0		0.39467	0	0.128169	0		0.39467	0.0001	0.128169	0.0001
	2057.7	1120.1	0.544346	2636.1	0	0	1497.5	0	0					0.544346	0	0			0.544346	0.0001	0.0001
				4174.5	0	0	2408.1	0	0	1101.5	124.7	0.113209			0	0	0.113209			0.0001	0.0001	0.113209
	2982.4	1272	0.426502	4056.2	91.9	0.0226567	1887	0	0	2502.3	1483	0.592655		0.426502	0.0226567	0	0.592655		0.426502	0.0226567	0.0001	0.592655
	2603.8	1847.8	0.709655	1446.8	305.2	0.210948	1981.2	0	0	2317.4	842.2	0.363425		0.709655	0.210948	0	0.363425		0.709655	0.210948	0.0001	0.363425
	3945.1	1489.7	0.377608	3585.7	0	0								0.377608	0				0.377608	0.0001
	3426.1	1808.5	0.52786	1038.6	0	0	3292.8	375.5	0.114037	1622	0	0		0.52786	0	0.114037	0		0.52786	0.0001	0.114037	0.0001
				5447.9	0	0	3482.6	564	0.161948	1683.1	0	0			0	0.161948	0		0.0001	0.0001	0.161948	0.0001
	2080.7	955.8	0.459365				3019.7	487.8	0.161539	1835.8	1075.3	0.585739		0.459365		0.161539	0.585739		0.459365		0.161539	0.585739
	1777.3	588.2	0.330951	1966.8	0	0	3648.7	485.6	0.133088	1106.8	0	0		0.330951	0	0.133088	0		0.330951	0.0001	0.133088	0.0001
	3178.6	679.9	0.213899	1612.6	0	0	2723.5	645.6	0.237048	1983.9	21.4	0.0107868		0.213899	0	0.237048	0.0107868		0.213899	0.0001	0.237048	0.0107868
	3231.6	986.1	0.305143	2562.8	239.6	0.0934915	2103.6	79.1	0.0376022	1408.5	248.8	0.176642		0.305143	0.0934915	0.0376022	0.176642		0.305143	0.0934915	0.0376022	0.176642
	95.4	0	0	1428.9	26.3	0.0184058	3020.7	0	0	1498.7	0	0		0	0.0184058	0	0		0.0001	0.0184058	0.0001	0.0001
				3316	0	0	2496.4	0	0						0	0				0.0001	0.0001
	1556.9	1679.6	1.07881	1617	0	0	907	0	0	2841.9	673.8	0.237095		1.07881	0	0	0.237095		1.07881	0.0001	0.0001	0.237095
	1272.5	348.9	0.274185	2366	0	0	3441.6	386.9	0.112419	3648.8	1473.1	0.403722		0.274185	0	0.112419	0.403722		0.274185	0.0001	0.112419	0.403722
										2665.1	0	0					0					0.0001
	2745.9	2682.8	0.97702	1078.9	0	0	2241.4	557.5	0.248728	3443.1	879	0.255293		0.97702	0	0.248728	0.255293		0.97702	0.0001	0.248728	0.255293
	2451.2	1731.1	0.706226	4164.7	361.2	0.0867289	1708	339.8	0.198946	3118.3	446.2	0.143091		0.706226	0.0867289	0.198946	0.143091		0.706226	0.0867289	0.198946	0.143091
	4384.4	2352.6	0.536584	3075.5	423	0.137539	1940.3	297.3	0.153224	4855.2	1390.6	0.286415		0.536584	0.137539	0.153224	0.286415		0.536584	0.137539	0.153224	0.286415
	2533	1369.8	0.540782	3974.7	0	0	457.6	0	0	2567.9	902.4	0.351416		0.540782	0	0	0.351416		0.540782	0.0001	0.0001	0.351416
				2368.2	0	0									0
	5115.8	573.6	0.112123	862.7	0	0	1900	0	0	1724.9	633.9	0.3675		0.112123	0	0	0.3675		0.112123	0.0001	0.0001	0.3675
	5389.5	1086.1	0.201521	1624.3	33.9	0.0208705	1922.3	0	0	2923.3	549.6	0.188007		0.201521	0.0208705	0	0.188007		0.201521	0.0208705	0.0001	0.188007
	6229.7	1504.8	0.241553	3551.8	0	0	398.8	0	0	2602.4	68.8	0.0264371		0.241553	0	0	0.0264371		0.241553	0.0001	0.0001	0.0264371
	5692.7	1076.8	0.189155	4744.8	656.3	0.13832	1980.4	0	0					0.189155	0.13832	0			0.189155	0.13832	0.0001
	4905.8	1135.2	0.2314				1334.9	0	0	5414.3	0	0		0.2314		0	0		0.2314		0.0001	0.0001
	5320.8	2156.4	0.405277	2861.1	125.4	0.0438293	1898.4	0	0	5966.4	0	0		0.405277	0.0438293	0	0		0.405277	0.0438293	0.0001	0.0001
	5771.6	1076.7	0.186551	5350.3	431.9	0.0807244				5190.2	881.5	0.169839		0.186551	0.0807244		0.169839		0.186551	0.0807244		0.169839
				5019.7	535.6	0.1067	1493.9	0	0	7810.9	478.7	0.0612862			0.1067	0	0.0612862			0.1067	0.0001	0.0612862
	1423	330.9	0.232537	5499.1	275.6	0.0501173	898.7	0	0	4534.7	1689.4	0.372549		0.232537	0.0501173	0	0.372549		0.232537	0.0501173	0.0001	0.372549
	545.7	2146.6	3.93366	5435.9	233.7	0.042992	1775.4	0	0	6052.2	280.8	0.0463964		3.93366	0.042992	0	0.0463964		3.93366	0.042992	0.0001	0.0463964
				2485.7	0	0	943.2	0	0	6222.9	139.6	0.0224333			0	0	0.0224333			0.0001	0.0001	0.0224333
	6701.8	2564.3	0.382629	2532.3	0	0				5704.2	2.4	0.000420743		0.382629	0		0.000420743		0.382629	0.0001		0.000420743
	6840.5	1418.6	0.207383	5704.7	631.3	0.110663	4114	852.5	0.207219	7923.6	0	0		0.207383	0.110663	0.207219	0		0.207383	0.110663	0.207219	0.0001
	2182.8	77.5	0.0355049				2010.1	87.5	0.0435302	5572.6	0	0		0.0355049		0.0435302	0		0.0355049		0.0435302	0.0001
				343	0	0	3544.6	595.7	0.168058	3614.5	917.3	0.253783			0	0.168058	0.253783			0.0001	0.168058	0.253783
	2897.9	1191.5	0.41116	1419.8	0	0	3657.2	956.1	0.26143	8379.9	209.7	0.0250242		0.41116	0	0.26143	0.0250242		0.41116	0.0001	0.26143	0.0250242
	3249	2104.8	0.64783	1011.2	290.3	0.287085	2347.9	520.8	0.221815					0.64783	0.287085	0.221815			0.64783	0.287085	0.221815
				1640.8	30.9	0.0188323	3510.3	705.9	0.201094	4124.2	593.7	0.143955			0.0188323	0.201094	0.143955		0.0001	0.0188323	0.201094	0.143955
	2411.2	1502.4	0.623092	1330.6	29.8	0.0223959	3058.2	358.9	0.117357	3044.4	0	0		0.623092	0.0223959	0.117357	0		0.623092	0.0223959	0.117357	0.0001
	1940.4	284.2	0.146465	1011.3	351.1	0.347177				3892.3	1515.3	0.389307		0.146465	0.347177		0.389307		0.146465	0.347177		0.389307
	1273.3	993.7	0.780413	615.7	208.4	0.338477	5877.6	254.9	0.043368	3595.8	447.1	0.12434		0.780413	0.338477	0.043368	0.12434		0.780413	0.338477	0.043368	0.12434
	1125.5	470.4	0.417948	1310.5	36.7	0.0280046	3345	0	0	2455.1	0	0		0.417948	0.0280046	0	0		0.417948	0.0280046	0.0001	0.0001
	1279.2	738.3	0.577158	1249.2	391.3	0.31324	3410.2	0	0					0.577158	0.31324	0			0.577158	0.31324	0.0001
	2333.4	1015.5	0.435202				3661.6	0	0	1380.8	0	0		0.435202		0	0		0.435202		0.0001	0.0001
	2025.4	898.5	0.443616	5553.3	561.7	0.101147	2937.6	0	0	3264.4	0	0		0.443616	0.101147	0	0		0.443616	0.101147	0.0001	0.0001
	2085.1	363.4	0.174284	3500.6	101.7	0.0290522	3403	1150.7	0.338143	3431.1	0	0		0.174284	0.0290522	0.338143	0		0.174284	0.0290522	0.338143	0.0001
	2585.9	674.3	0.26076	4064.2	626.2	0.154077	2741.5	1290.1	0.470582	2665.4	23.2	0.00870413		0.26076	0.154077	0.470582	0.00870413		0.26076	0.154077	0.470582	0.00870413
				3535.7	633.7	0.179229	3780	0	0	4562.6	1077.2	0.236093			0.179229	0	0.236093			0.179229	0.0001	0.236093
	164.4	631.5	3.84124	2214.8	1032	0.465956	2709.8	0	0	4016	1386.7	0.345294		3.84124	0.465956	0	0.345294		3.84124	0.465956	0.0001	0.345294
	1573.2	645.5	0.41031	3790.9	1040.3	0.27442	4706.7	698.6	0.148427	4312.6	253.2	0.0587117		0.41031	0.27442	0.148427	0.0587117		0.41031	0.27442	0.148427	0.0587117
	532.1	58.5	0.109942	3448.1	698.3	0.202517				3583.7	0	0		0.109942	0.202517		0		0.109942	0.202517		0.0001
	2525.1	391.7	0.155123				1454.2	0	0	3168.2	0	0		0.155123		0	0		0.155123		0.0001	0.0001
	1721.3	178.1	0.103468	564.8	0	0	1954.1	0	0	2439.4	0	0		0.103468	0	0	0		0.103468	0.0001	0.0001	0.0001
				1047.7	324.5	0.309726	2648.9	24.4	0.00921137	3365.5	667.8	0.198425			0.309726	0.00921137	0.198425			0.309726	0.00921137	0.198425
	3711.8	895.9	0.241365	1645.7	0	0	2619.6	0	0					0.241365	0	0			0.241365	0.0001	0.0001
	5726.5	670.3	0.117052	3606.3	0	0	2149.8	0	0	2435.4	0	0		0.117052	0	0	0		0.117052	0.0001	0.0001	0.0001
	5114.1	593.8	0.11611	3695.5	0	0	2428.7	1497.2	0.616461	2633.6	326.4	0.123937		0.11611	0	0.616461	0.123937		0.11611	0.0001	0.616461	0.123937
	5011.4	492.4	0.098256				2308.4	0	0	2551	678.3	0.265896		0.098256		0	0.265896		0.098256		0.0001	0.265896
	5208.1	625.3	0.120063							2213.4	197.2	0.0890937		0.120063			0.0890937		0.120063			0.0890937
	4337.9	478.6	0.11033	1527	0	0	5122.4	853.2	0.166563	2436.8	308.6	0.126641		0.11033	0	0.166563	0.126641		0.11033	0.0001	0.166563	0.126641
	5312.7	567.7	0.106857	1722	0	0	3601.1	564.7	0.156813	2264.7	0	0		0.106857	0	0.156813	0		0.106857	0.0001	0.156813	0.0001
	4147.2	459.3	0.110749	1915.1	0	0	2434.1	471.3	0.193624					0.110749	0	0.193624			0.110749	0.0001	0.193624
	4737	842.1	0.177771	4187.2	0	0	3501.3	399.2	0.114015	1972.7	0	0		0.177771	0	0.114015	0		0.177771	0.0001	0.114015	0.0001
	4058.6	590.8	0.145567	1904.1	0	0	4586.6	258.6	0.0563816	1146.4	0	0		0.145567	0	0.0563816	0		0.145567	0.0001	0.0563816	0.0001
	4850	502	0.103505	5648.1	0	0	4088.8	504.5	0.123386	2734.4	183.7	0.0671811		0.103505	0	0.123386	0.0671811		0.103505	0.0001	0.123386	0.0671811
	3159.9	1071.2	0.338998				8676	1838.1	0.21186	2248	0	0		0.338998		0.21186	0		0.338998		0.21186	0.0001
	2972.2	933.1	0.313943	954.2	1.7	0.0017816				1953.9	0	0		0.313943	0.0017816		0		0.313943	0.0017816		0.0001
				2771.9	329.1	0.118727	1477.2	0	0	1675.9	241.9	0.14434			0.118727	0	0.14434			0.118727	0.0001	0.14434
	2091.6	1744.8	0.834194	3873.4	722	0.1864	2124.2	230.4	0.108464	1907.5	254.6	0.133473		0.834194	0.1864	0.108464	0.133473		0.834194	0.1864	0.108464	0.133473
	2532.2	850.3	0.335795	4546.5	192.5	0.0423403	2117.4	0	0	1809.6	0	0		0.335795	0.0423403	0	0		0.335795	0.0423403	0.0001	0.0001
	2133.5	1021.2	0.47865	4743.2	680.8	0.143532	1604.2	666.4	0.41541	1752.7	0	0		0.47865	0.143532	0.41541	0		0.47865	0.143532	0.41541	0.0001
				4475.6	451.6	0.100903				2376.9	0	0			0.100903		0			0.100903		0.0001
	1729.7	830	0.479852	4208.5	933.2	0.221742	2682.2	252.8	0.094251	2431.5	0	0		0.479852	0.221742	0.094251	0		0.479852	0.221742	0.094251	0.0001
	2807.3	1481.2	0.527624	5914	1264.3	0.213781	3213.6	0	0	2240	0	0		0.527624	0.213781	0	0		0.527624	0.213781	0.0001	0.0001
	2818.3	1095	0.388532	4264.7	292.2	0.068516	2296.2	0	0					0.388532	0.068516	0			0.388532	0.068516	0.0001
	2685.4	1029.4	0.383332	2786	800.3	0.287258	2502.9	594.9	0.237684	3957.5	746.5	0.188629		0.383332	0.287258	0.237684	0.188629		0.383332	0.287258	0.237684	0.188629
	1877.5	43.6	0.0232224							5786.3	976.1	0.168692		0.0232224			0.168692		0.0232224			0.168692
				1778.9	1702.3	0.95694	2144.9	1606.1	0.748799	6479.2	2116.2	0.326614			0.95694	0.748799	0.326614			0.95694	0.748799	0.326614
	1544.4	1080.8	0.699819	1931.7	1710.4	0.885438	2082.8	1475.9	0.708613	4703.3	1114.8	0.237025		0.699819	0.885438	0.708613	0.237025		0.699819	0.885438	0.708613	0.237025
	2068.2	1635.2	0.790639	3182.1	1991.6	0.625876			#DIV/0!	4963.1	2042.8	0.411598		0.790639	0.625876		0.411598		0.790639	0.625876		0.411598
	2876.7	1664.1	0.578475	2739.7	1903.4	0.694748	1703.3	0	0	3560.4	734.7	0.206353		0.578475	0.694748	0	0.206353		0.578475	0.694748	0.0001	0.206353
	4390.7	2161.9	0.492382	2977.5	1920.9	0.645139	1701	281.1	0.165256					0.492382	0.645139	0.165256			0.492382	0.645139	0.165256
	1775.5	634.6	0.35742	3927.8	2045.1	0.520673	2570.3	0	0	4450.1	1468.3	0.329948		0.35742	0.520673	0	0.329948		0.35742	0.520673	0.0001	0.329948
				2467.2	1157.6	0.469196	2768.4	86.8	0.0313539	3359.1	1068.4	0.318061			0.469196	0.0313539	0.318061			0.469196	0.0313539	0.318061
	5934.4	2050.6	0.345545	2244.6	1131.7	0.504188				4706.8	1306.4	0.277556		0.345545	0.504188		0.277556		0.345545	0.504188		0.277556
	4981.3	1747.1	0.350732	2753.3	1494.9	0.542948	1340.9	71.6	0.053397	2311.4	1133	0.490179		0.350732	0.542948	0.053397	0.490179		0.350732	0.542948	0.053397	0.490179
	7218.3	1419.2	0.196611				1462.5	0	0	3025.5	650.4	0.214973		0.196611		0	0.214973		0.196611		0.0001	0.214973
	5930.1	368.1	0.0620732	980.3	0	0	1458.2	0	0	3392.8	611.7	0.180294		0.0620732	0	0	0.180294		0.0620732	0.0001	0.0001	0.180294
	3662.9	1227.8	0.335199	2526.7	0	0	1407.7	0	0	4230.2	987.9	0.233535		0.335199	0	0	0.233535		0.335199	0.0001	0.0001	0.233535
	3654.9	1077.1	0.2947	3275.2	362.9	0.110802	937	0	0					0.2947	0.110802	0			0.2947	0.110802	0.0001
	5749.8	1538.3	0.26754	2000.9	589.3	0.294517	1634.3	0	0	2856.2	420.9	0.147364		0.26754	0.294517	0	0.147364		0.26754	0.294517	0.0001	0.147364
	7333	1117.6	0.152407	562.4	0	0	2646.3	0	0	3429.2	1021	0.297737		0.152407	0	0	0.297737		0.152407	0.0001	0.0001	0.297737
	6288.7	2720.6	0.432617	1856.7	0	0				4063.7	910	0.223934		0.432617	0		0.223934		0.432617	0.0001		0.223934
	2911.8	1340.1	0.460231	1152	0	0	1647.7	0	0	3962.9	1615.6	0.407681		0.460231	0	0	0.407681		0.460231	0.0001	0.0001	0.407681
	2970.9	1628	0.547982	874.3	0	0	1711.9	0	0	2618.1	929.5	0.355028		0.547982	0	0	0.355028		0.547982	0.0001	0.0001	0.355028
	2104.1	2186.4	1.03911	868.5	0	0	1794.5	0	0	3022.4	2031	0.671983		1.03911	0	0	0.671983		1.03911	0.0001	0.0001	0.671983
	2191.6	1157.2	0.528016				1629.3	0	0	3798.9	1238.7	0.326068		0.528016		0	0.326068		0.528016		0.0001	0.326068
	4085.7	199.8	0.0489023	2448.2	0	0	1381.7	0	0	2934.1	1068.6	0.3642		0.0489023	0	0	0.3642		0.0489023	0.0001	0.0001	0.3642
	883.6	664	0.751471	4966.8	677	0.136305	1994.1	260.7	0.130736					0.751471	0.136305	0.130736			0.751471	0.136305	0.130736
				1068.2	0	0				4689.1	434.8	0.0927257			0		0.0927257			0.0001		0.0927257
	1871.7	767.7	0.410162	3159.9	271.5	0.0859204	2517.1	235.4	0.0935203	4889.8	699	0.142951		0.410162	0.0859204	0.0935203	0.142951		0.410162	0.0859204	0.0935203	0.142951
	2467.3	1150.4	0.466259	3715.2	0	0	1054	26.8	0.0254269	7106.9	0	0		0.466259	0	0.0254269	0		0.466259	0.0001	0.0254269	0.0001
	2728	973.3	0.356782	623.5	57.6	0.0923817	2040.1	322.6	0.15813	3802	0	0		0.356782	0.0923817	0.15813	0		0.356782	0.0923817	0.15813	0.0001
	1266.9	793.5	0.626332	7226.2	510.7	0.0706734	2397.9	525.2	0.219025	5621.5	1148.5	0.204305		0.626332	0.0706734	0.219025	0.204305		0.626332	0.0706734	0.219025	0.204305
	3141.1	1149	0.365795				2156.3	686.2	0.31823	5213.1	737.1	0.141394		0.365795		0.31823	0.141394		0.365795		0.31823	0.141394
	1809.1	701.3	0.387651	4752.5	524.6	0.110384	3209.3	0	0	4980.2	177.7	0.0356813		0.387651	0.110384	0	0.0356813		0.387651	0.110384	0.0001	0.0356813
				4057.2	601.7	0.148304	2353	738.7	0.31394	6939.4	195.9	0.0282301			0.148304	0.31394	0.0282301			0.148304	0.31394	0.0282301
	1097.8	113	0.102933	1867.2	34.4	0.0184233				3288.6	0	0		0.102933	0.0184233		0		0.102933	0.0184233		0.0001
	1592.8	574	0.360372	2503.4	0	0	4182.3	71.6	0.0171198	3486.5	185.1	0.0530905		0.360372	0	0.0171198	0.0530905		0.360372	0.0001	0.0171198	0.0530905
	1572.3	0	0	1846.5	274.6	0.148714	4404.6	337.9	0.0767153	3845.7	476.2	0.123827		0	0.148714	0.0767153	0.123827			0.148714	0.0767153	0.123827
	3006.9	2760.3	0.917989	6241.7	760.2	0.121794	4102	48.7	0.0118723	2073	0	0		0.917989	0.121794	0.0118723	0		0.917989	0.121794	0.0118723	0.0001
	2478.4	231.6	0.0934474	3277.2	0	0	7206.2	332.7	0.0461686	5452	233.7	0.042865		0.0934474	0	0.0461686	0.042865		0.0934474	0.0001	0.0461686	0.042865
	1612	0	0	783	751.3	0.959515	2984.7	0	0					0	0.959515	0			0.0001	0.959515	0.0001
							3174.2	240.9	0.0758931	4616.5	392.8	0.0850861				0.0758931	0.0850861				0.0758931	0.0850861
	1939.1	1187.9	0.612604	3840.9	204.6	0.0532688		0		4818.6	575.9	0.119516		0.612604	0.0532688		0.119516		0.612604	0.0532688		0.119516
	4416.6	3437.9	0.778404	5922.5	665.7	0.112402	2306.1	344.7	0.149473	4348.7	144.1	0.0331363		0.778404	0.112402	0.149473	0.0331363		0.778404	0.112402	0.149473	0.0331363
	3846.3	2513	0.653355	2930.4	0	0	2755.8	822.8	0.29857	4647.4	552	0.118776		0.653355	0	0.29857	0.118776		0.653355	0.0001	0.29857	0.118776
	3958.6	2853.8	0.720911	2375.4	0	0	2295.9	0	0	3819.7	431.6	0.112993		0.720911	0	0	0.112993		0.720911	0.0001	0.0001	0.112993
	4678.4	3223.1	0.688932	1516.7	0	0				2562.5	0	0		0.688932	0		0		0.688932	0.0001		0.0001
	5052.9	2898.2	0.573572				3752.8	116.8	0.0311234	4668.5	802	0.17179		0.573572		0.0311234	0.17179		0.573572	0.0001	0.0311234	0.17179
	3932.7	1592.2	0.404862	2880.1	142.3	0.049408	3620.2	70.3	0.0194188					0.404862	0.049408	0.0194188			0.404862	0.049408	0.0194188
	4018.2	1480.4	0.368424	3396.6	0	0	4667.3	1137.1	0.243631	2445.8	0	0		0.368424	0	0.243631	0		0.368424	0.0001	0.243631	0.0001
	3216.4	854.6	0.265701	2260.3	34.8	0.0153962	2844.7	0	0	4546.5	901.7	0.198328		0.265701	0.0153962	0	0.198328		0.265701	0.0153962	0.0001	0.198328
	3118.9	462.7	0.148354	3433.2	173.5	0.0505359	3567.7	1141.9	0.320066	5416.3	1366	0.252202		0.148354	0.0505359	0.320066	0.252202		0.148354	0.0505359	0.320066	0.252202
	3128.3	778.6	0.248889	3206.8	111.2	0.0346763	3590.8	889	0.247577	3762.6	587.9	0.156248		0.248889	0.0346763	0.247577	0.156248		0.248889	0.0346763	0.247577	0.156248
							5277.3	980	0.185701	3690.6	0	0				0.185701	0				0.185701	0.0001
	1324.1	270.8	0.204516	3159.7	308.9	0.0977624	4387.8	1066.1	0.242969	3584.6	263.9	0.0736205		0.204516	0.0977624	0.242969	0.0736205		0.204516	0.0977624	0.242969	0.0736205
	2667	701.7	0.263105	3858	445.8	0.115552	3677.6	0	0					0.263105	0.115552	0			0.263105	0.115552	0.0001
	3099.6	336.7	0.108627	2157.1	569.7	0.264105	2743.9	397.7	0.14494	1405.3	0	0		0.108627	0.264105	0.14494	0		0.108627	0.264105	0.14494	0.0001
	3606.6	658.9	0.182693	3635.4	1055.8	0.290422	2767.8	40.8	0.0147409	916.6	0	0		0.182693	0.290422	0.0147409	0		0.182693	0.290422	0.0147409	0.0001
	2840	1601	0.563732	8954.3	1085.6	0.121238	3329.5	0	0	2713.5	357.5	0.131749		0.563732	0.121238	0	0.131749		0.563732	0.121238	0.0001	0.131749
	1727	765.1	0.443023	4360	998.3	0.228968	591.2	0	0	3442.1	848.2	0.246419		0.443023	0.228968	0	0.246419		0.443023	0.228968	0.0001	0.246419
	2009.3	689.9	0.343353	4051	849	0.209578	3523.2	649.6	0.184378	2104.1	445	0.211492		0.343353	0.209578	0.184378	0.211492		0.343353	0.209578	0.184378	0.211492
	2398.1	828.1	0.345315	7554.7	1276.3	0.168941				3367.8	799.6	0.237425		0.345315	0.168941		0.237425		0.345315	0.168941		0.237425
	2695.6	1210.2	0.448954	5367.2	753	0.140297	2180	296.7	0.136101	2957	1051.4	0.355563		0.448954	0.140297	0.136101	0.355563		0.448954	0.140297	0.136101	0.355563
	937.7	512.7	0.546763	3842.1	304	0.0791234	1545.4	155.6	0.100686	2938.5	0	0		0.546763	0.0791234	0.100686	0		0.546763	0.0791234	0.100686	0.0001
	2518.8	973.4	0.386454	3725.5	381.7	0.102456				2869.5	0	0		0.386454	0.102456		0		0.386454	0.102456	0.0001	0.0001
	1104.8	270.2	0.244569	2999	375.5	0.125208	7386.1	807	0.109259					0.244569	0.125208	0.109259			0.244569	0.125208	0.109259
	4100.4	841.8	0.205297	2603	4.9	0.00188244	7264.5	672.3	0.0925459	1977.8	272.9	0.137982		0.205297	0.00188244	0.0925459	0.137982		0.205297	0.00188244	0.0925459	0.137982
				1484.3	0	0	6673.7	588.6	0.088197	1251.1	0	0			0	0.088197	0			0.0001	0.088197	0.0001
	2655.6	366.3	0.137935	1220.5	85.7	0.0702171	6716.6	0	0	2018.2	430.9	0.213507		0.137935	0.0702171	0	0.213507		0.137935	0.0702171	0.0001	0.213507
	3486	563.6	0.161675	1492.8	0	0	6668.1	0	0					0.161675	0	0			0.161675	0.0001	0.0001
	3661.9	855.5	0.233622	1823.3	0	0	5585.6	0	0	1617.1	0	0		0.233622	0	0	0		0.233622	0.0001	0.0001	0.0001
	2549.1	558.4	0.219058	1796.5	309.2	0.172112	3874.3	0	0	2289.3	1204.2	0.526012		0.219058	0.172112	0	0.526012		0.219058	0.172112	0.0001	0.526012
	2336.3	319.4	0.136712	817.8	0	0	4041.4	8.2	0.002029	2084.9	903.1	0.433162		0.136712	0	0.002029	0.433162		0.136712	0.0001	0.002029	0.433162
				1624.2	0	0	6945.5	637.4	0.0917717	2415.8	1235	0.511218			0	0.0917717	0.511218			0.0001	0.0917717	0.511218
	1397.9	1203.1	0.860648			#DIV/0!	5373.8	21	0.00390785	2332.6	0	0		0.860648		0.00390785	0		0.860648		0.00390785	0.0001
	1744.8	1316.9	0.754757	5135.2	80.1	0.0155982	7029.4	598.6	0.0851566					0.754757	0.0155982	0.0851566			0.754757	0.0155982	0.0851566
	1155.4	1381.7	1.19586	1599.6	0	0				3338.9	773	0.231513		1.19586	0		0.231513		1.19586	0.0001		0.231513
				5395.6	338.4	0.0627178	3063.1	0.5	0.000163233	3427.2	828.2	0.241655			0.0627178	0.000163233	0.241655			0.0627178	0.000163233	0.241655
	1985.2	980.5	0.493905	3883	334.9	0.0862477	1105.7	0	0	2383.8	218.1	0.0914926		0.493905	0.0862477	0	0.0914926		0.493905	0.0862477	0.0001	0.0914926
	1279.1	925.7	0.723712	5411.6	152.3	0.0281432	3274.6	1031.8	0.315092	2289.2	867.2	0.378822		0.723712	0.0281432	0.315092	0.378822		0.723712	0.0281432	0.315092	0.378822
				3483.2	86.5	0.0248335	3772.4	0	0						0.0248335	0				0.0248335	0.0001
	1410.4	50.2	0.0355927	4479.7	336.4	0.0750943	3298.3	0	0	1475.7	0	0		0.0355927	0.0750943	0	0		0.0355927	0.0750943	0.0001	0.0001
	2132.4	1353.8	0.634872	4672.2	327.7	0.0701383	2351	0	0	2003.6	0	0		0.634872	0.0701383	0	0		0.634872	0.0701383	0.0001	0.0001
	1513.4	397.6	0.26272	4672.6	276.9	0.0592604	2907	9.6	0.00330237	3774.5	1545.1	0.409352		0.26272	0.0592604	0.00330237	0.409352		0.26272	0.0592604	0.00330237	0.409352
				5450.1	489.1	0.0897415	1605.9	0	0	3768.1	748.8	0.198721			0.0897415	0	0.198721			0.0897415	0.0001	0.198721
	523.3	609.3	1.16434	3652.1	154.3	0.0422497	2681.7	0	0	1526.7	2069.7	1.35567		1.16434	0.0422497	0	1.35567		1.16434	0.0422497	0.0001	1.35567
	638.7	1766.5	2.76577	2413.5	84.3	0.0349285				1333.9	0	0		2.76577	0.0349285		0		2.76577	0.0349285		0.0001
	707.5	2098.6	2.96622				4143.5	834.6	0.201424					2.96622		0.201424			2.96622		0.201424
	1825.7	2587.3	1.41716	272.4	0	0	3284.1	52.8	0.0160775	1830	0	0		1.41716	0	0.0160775	0		1.41716	0.0001	0.0160775	0.0001
	979.5	1108.2	1.13139	1664.5	0	0	3427.2	727.2	0.212185	2634.2	0	0		1.13139	0	0.212185	0		1.13139	0.0001	0.212185	0.0001
	447.3	66.9	0.149564	1821.7	114.9	0.063073	3942.3	1413.1	0.358446	2489.7	111.9	0.0449452		0.149564	0.063073	0.358446	0.0449452		0.149564	0.063073	0.358446	0.0449452
				1453.4	0	0				4315.4	187.3	0.0434027			0		0.0434027			0.0001		0.0434027
	1123.4	613.4	0.546021	1403.9	70.2	0.0500036	1376.2	1138.8	0.827496	4007.4	0	0		0.546021	0.0500036	0.827496	0		0.546021	0.0500036	0.827496	0.0001
	2207	771.7	0.34966	1809.2	0	0				3655.7	73.3	0.0200509		0.34966	0		0.0200509		0.34966	0.0001		0.0200509
	2638.2	789.7	0.299333	2097.4	0	0	1164.7	1192.2	1.02361	4866.3	354.3	0.0728069		0.299333	0	1.02361	0.0728069		0.299333	0.0001	1.02361	0.0728069
	2502.2	390.1	0.155903				1480.4	977.2	0.660092					0.155903		0.660092			0.155903		0.660092
	2343.9	2379.4	1.01515	4136	491.5	0.118835	1538.9	1541.9	1.00195	2507.4	0	0		1.01515	0.118835	1.00195	0		1.01515	0.118835	1.00195	0.0001
	1602.3	1942.2	1.21213	944	0	0	885	0	0	2378.7	214	0.0899651		1.21213	0	0	0.0899651		1.21213	0.0001	0.0001	0.0899651
				1313.8	195.6	0.148881	1882.2	0	0	3174.7	918.9	0.289445			0.148881	0	0.289445			0.148881	0.0001	0.289445
	2243.8	596.1	0.265665	2675.1	0	0	2643.4	0	0	4189.4	1115.6	0.266291		0.265665	0	0	0.266291		0.265665	0.0001	0.0001	0.266291
	2161.5	1764.8	0.81647	2433.1	0	0	1032.2	0	0	3176.7	0	0		0.81647	0	0	0		0.81647	0.0001	0.0001	0.0001
	2792.7	1844.3	0.6604	1914.2	100.3	0.0523979				2186.3	0	0		0.6604	0.0523979		0		0.6604	0.0523979		0.0001
	2828.8	2301.1	0.813454	2571.3	0	0	2546.7	0	0	2863.9	0	0		0.813454	0	0	0		0.813454	0.0001	0.0001	0.0001
	2220.9	2388.8	1.0756				1714.6	0	0	2630.7	0	0		1.0756		0	0		1.0756		0.0001	0.0001
	2331	565.9	0.242771	2382.6	336	0.141022	1943.3	452.4	0.2328	3025.4	94.9	0.0313678		0.242771	0.141022	0.2328	0.0313678		0.242771	0.141022	0.2328	0.0313678
	2740.8	925	0.337493	5305.7	138.2	0.0260475	2848.1	0	0					0.337493	0.0260475	0			0.337493	0.0260475	0.0001
	1643.7	1291.1	0.785484	5430.1	185.5	0.0341614	3696	9.8	0.00265152	2751.9	60.7	0.0220575		0.785484	0.0341614	0.00265152	0.0220575		0.785484	0.0341614	0.00265152	0.0220575
	1503.5	1559.2	1.03705	3658.7	183	0.0500178				3170.2	0	0		1.03705	0.0500178		0		1.03705	0.0500178		0.0001
	1515.7	840	0.554199	4838.4	403.8	0.0834573	1936.6	0	0	5714.3	41.3	0.00722748		0.554199	0.0834573	0	0.00722748		0.554199	0.0834573	0.0001	0.00722748
				2532.4	358.1	0.141407	2078	0	0	4895.6	220.4	0.04502			0.141407	0	0.04502			0.141407	0.0001	0.04502
	1214.7	721.8	0.594221	3299.2	148.8	0.0451018	1304.4	0	0	2142.5	55	0.0256709		0.594221	0.0451018	0	0.0256709		0.594221	0.0451018	0.0001	0.0256709
	1112	200.2	0.180036	3709.5	0	0	3329.8	629.6	0.18908	3327.1	118.4	0.0355865		0.180036	0	0.18908	0.0355865		0.180036	0.0001	0.18908	0.0355865
	2032.3	1742.9	0.8576	2431.8	0	0	3638.5	570.6	0.156823	4887.7	0	0		0.8576	0	0.156823	0		0.8576	0.0001	0.156823	0.0001
				4267.1	0	0	4232.7	99.1	0.023413	4008.4	111.7	0.0278665			0	0.023413	0.0278665			0.0001	0.023413	0.0278665
	2529.5	781.9	0.309112	3606	73.6	0.0204104	2133.3	0	0					0.309112	0.0204104	0			0.309112	0.0204104	0.0001
	1913	890.3	0.465395	1895.3	76.3	0.0402575	3412.8	719.2	0.210736	2928.2	1508.4	0.515129		0.465395	0.0402575	0.210736	0.515129		0.465395	0.0402575	0.210736	0.515129
	4967.7	2343.7	0.471788				3189.6	0	0	2333.4	0	0		0.471788		0	0		0.471788		0.0001	0.0001
	4545.7	930.6	0.204721	1896.7	185.4	0.0977487	2339.8	397.2	0.169758	2206.5	681.9	0.309041		0.204721	0.0977487	0.169758	0.309041		0.204721	0.0977487	0.169758	0.309041
	3960.8	1416.1	0.357529	2177	197.6	0.0907671	2895.2	0	0	2192	1394.4	0.636131		0.357529	0.0907671	0	0.636131		0.357529	0.0907671	0.0001	0.636131
	3303.5	1915.4	0.579809	2421.2	150.4	0.062118	4448.9	614.5	0.138124	2083.1	204.4	0.098123		0.579809	0.062118	0.138124	0.098123		0.579809	0.062118	0.138124	0.098123
	2925.1	1806.2	0.617483	2154.7	62.2	0.0288671	2632.4	0	0	1859.8	0	0		0.617483	0.0288671	0	0		0.617483	0.0288671	0.0001	0.0001
	3129.8	720.6	0.230238	3298	189.3	0.0573984								0.230238	0.0573984				0.230238	0.0573984
	4705.3	1043	0.221665	1993.1	0	0	910	0	0	4973.6	335.8	0.0675165		0.221665	0	0	0.0675165		0.221665	0.0001	0.0001	0.0675165
	4488.7	1447.3	0.322432	1922.7	524.7	0.272897	892.2	0	0	2747.6	0	0		0.322432	0.272897	0	0		0.322432	0.272897	0.0001	0.0001
	5167.6	2434.4	0.471089	1982.9	492.4	0.248323	1234	7	0.00567261	5368.5	1316.8	0.245283		0.471089	0.248323	0.00567261	0.245283		0.471089	0.248323	0.00567261	0.245283
	3172.6	2438.5	0.768612				2004.7	0	0	5274.3	920.9	0.174601		0.768612		0	0.174601		0.768612		0.0001	0.174601
	3015	359.3	0.119171	2523.8	0	0	1132.1	0	0	4811	1658.3	0.344689		0.119171	0	0	0.344689		0.119171	0.0001	0.0001	0.344689
	2335.6	105.5	0.0451704	1534.1	0	0	2374.5	119.2	0.0502	2951.5	0	0		0.0451704	0	0.0502	0		0.0451704	0.0001	0.0502	0.0001
	2644.4	759.4	0.287173	3025.2	4.9	0.00161973	935.4	641.8	0.686124	3931.1	350.9	0.0892625		0.287173	0.00161973	0.686124	0.0892625		0.287173	0.00161973	0.686124	0.0892625
	3611	299.8	0.0830241	1882.2	0	0	1027.8	254.5	0.247616	3942.2	152.7	0.0387347		0.0830241	0	0.247616	0.0387347		0.0830241	0.0001	0.247616	0.0387347
				2455.3	0	0	4156.4	732.2	0.176162						0	0.176162				0.0001	0.176162
	1475.7	2034.6	1.37874	1427.3	0	0				2413.4	590.5	0.244676		1.37874	0		0.244676		1.37874	0.0001		0.244676
	1822.4	2480.5	1.36112	1336	0	0	1503.7	0	0	3022.3	898.1	0.297158		1.36112	0	0	0.297158		1.36112	0.0001	0.0001	0.297158
							962.8	0	0	3339.9	758.5	0.227103				0	0.227103				0.0001	0.227103
	1166.2	1602	1.37369	2200	0	0	2497	0	0	7319.8	1884.6	0.257466		1.37369	0	0	0.257466		1.37369	0.0001	0.0001	0.257466
	1001.5	879.5	0.878183	3402.7	106.4	0.0312693	3005.4	0	0	4222	960.2	0.227428		0.878183	0.0312693	0	0.227428		0.878183	0.0312693	0.0001	0.227428
	877.8	557.3	0.634883	2787.4	0	0	1865.8	0	0	4544.2	759.7	0.16718		0.634883	0	0	0.16718		0.634883	0.0001	0.0001	0.16718
	1119.9	882.6	0.788106	2572.8	0	0	1804.2	0	0					0.788106	0	0			0.788106	0.0001	0.0001
	1005.5	1678	1.66882	2873.1	171.1	0.0595524	2406.6	323.7	0.134505	1177.8	0	0		1.66882	0.0595524	0.134505	0		1.66882	0.0595524	0.134505	0.0001
				2279.4	442.9	0.194306	2265.1	240.3	0.106088	2055	0	0			0.194306	0.106088	0			0.194306	0.106088	0.0001
	1748.3	2027.5	1.1597	1476.7	317.2	0.214803	2546.7	535.2	0.210154	2333.1	0	0		1.1597	0.214803	0.210154	0		1.1597	0.214803	0.210154	0.0001
	1342	1436	1.07004	2485.4	406.2	0.163434	2539	677.9	0.266995	2030.4	480.9	0.23685		1.07004	0.163434	0.266995	0.23685		1.07004	0.163434	0.266995	0.23685
	1817.3	2186.6	1.20321				910.4	0	0					1.20321		0			1.20321		0.0001	0.0001
	2090.6	3710.1	1.77466	1092.8	115.7	0.105875	1122.9	0	0	1137.4	0	0		1.77466	0.105875	0	0		1.77466	0.105875	0.0001	0.0001
	1674.2	3021.2	1.80456	1416	88.7	0.0626412	2862.6	0	0	1141.9	58	0.0507925		1.80456	0.0626412	0	0.0507925		1.80456	0.0626412	0.0001	0.0507925
	864.4	1818.3	2.10354	1422.9	199.5	0.140207				2387	471.3	0.197444		2.10354	0.140207		0.197444		2.10354	0.140207	0.0001	0.197444
				1351.9	145	0.107256	2006.6	1105	0.550683	1228.4	41.4	0.0337024			0.107256	0.550683	0.0337024			0.107256	0.550683	0.0337024
	3099.2	845.6	0.272845	4013.3	260.5	0.0649092				1547.8	0	0		0.272845	0.0649092		0		0.272845	0.0649092		0.0001
	3366.5	718.1	0.213308	2550.3	224.8	0.0881465								0.213308	0.0881465				0.213308	0.0881465
	3673.4	466.9	0.127103	2604.2	108.2	0.0415483								0.127103	0.0415483				0.127103	0.0415483
	2180.4	0	0	756.6	26.3	0.0347608								0	0.0347608				0.0001	0.0347608
	2356.8	1038.9	0.44081	1760.7	181.6	0.103141								0.44081	0.103141				0.44081	0.103141
	384.2	0	0	3192.6	148.9	0.0466391								0	0.0466391				0.0001	0.0466391
	454.5	0	0	4639.6	106.9	0.0230408								0	0.0230408				0.0001	0.0230408
	1952.6	2142.5	1.09725	5780.2	691.3	0.119598								1.09725	0.119598				1.09725	0.119598
	1978.4	987.8	0.499292	4720.9	239.9	0.0508166								0.499292	0.0508166				0.499292	0.0508166
	1642.1	352.7	0.214786	5454.7	0	0								0.214786	0				0.214786	0.0001
	896.1	460.1	0.513447	6155	186.6	0.0303168								0.513447	0.0303168				0.513447	0.0303168
	616.8	0	0	6803.9	382.5	0.0562178								0	0.0562178				0.0001	0.0562178
				8372.4	70.9	0.0084683									0.0084683					0.0084683
	2547.9	2565.8	1.00703	3830.6	0	0								1.00703	0				1.00703	0.0001
	6724.4	4583.4	0.681607	3360.9	0	0								0.681607	0				0.681607	0.0001
	3109.3	1370	0.440614	5364.8	0	0								0.440614	0				0.440614	0.0001
	2921.3	1491.4	0.510526	3385.3	211.1	0.0623578								0.510526	0.0623578				0.510526	0.0623578
	92.9	0	0	4863.3	756.6	0.155573								0	0.155573				0.0001	0.155573
	1336.1	1369.8	1.02522	5704.7	921.1	0.161463								1.02522	0.161463				1.02522	0.161463
	4141.1	2002.5	0.483567	5626	625.7	0.111216								0.483567	0.111216				0.483567	0.111216
	1178.8	909.6	0.771632	5424.4	375.3	0.0691874								0.771632	0.0691874				0.771632	0.0691874
	1343.5	0	0	5116.1	620.2	0.121225								0	0.121225				0.0001	0.121225
	2149.6	2369.1	1.10211	4923.6	479	0.0972865								1.10211	0.0972865				1.10211	0.0972865
	1436.6	1123.4	0.781985	6555.7	975.2	0.148756								0.781985	0.148756				0.781985	0.148756
	697.9	1338.2	1.91747											1.91747					1.91747
				2519.7	0	0									0					0.0001
	1242.2	1123.1	0.904122	2047.8	0	0								0.904122	0				0.904122	0.0001
	1974.4	1308.1	0.66253	3633.1	0	0								0.66253	0				0.66253	0.0001
	2252.9	959.8	0.426029	2308.4	0	0								0.426029	0				0.426029	0.0001
	2132.1	561.6	0.263402	3570.6	773.2	0.216546								0.263402	0.216546				0.263402	0.216546
	2235.1	558.5	0.249877	2873.8	484.1	0.168453								0.249877	0.168453				0.249877	0.168453
	2093.9	1040.9	0.497111	2934.5	601.7	0.205043								0.497111	0.205043				0.497111	0.205043
	1633.5	833.2	0.51007	2439.2	0	0								0.51007	0				0.51007	0.0001
	2037.2	1383.9	0.679315	4335.8	88.7	0.0204576								0.679315	0.0204576				0.679315	0.0204576
	1014.4	843.2	0.83123											0.83123					0.83123
	228.8	939.6	4.10664	2439.4	46.8	0.019185								4.10664	0.019185				4.10664	0.019185
				2365.4	266.6	0.112708									0.112708					0.112708
				3017.8	315.5	0.104546									0.104546					0.104546
				1760.6	0	0									0					0.0001
				2259.1	105.9	0.0468771									0.0468771					0.0468771
				3341.3	0	0									0					0.0001
				3456.3	0	0									0					0.0001
				1284.3	0	0									0					0.0001
				1860.9	0	0									0					0.0001
				1321	0	0									0					0.0001
				314.3	0	0									0					0.0001
				1423.2	0	0									0					0.0001
				515	0	0									0					0.0001
				2383.1	163.5	0.0686081									0.0686081					0.0686081
				3520.7	242.1	0.0687647									0.0687647					0.0687647
				726.6	193.5	0.266309									0.266309					0.266309
				1144.5	195.4	0.17073									0.17073					0.17073
				1138.6	70.7	0.0620938									0.0620938					0.0620938
				1645.5	55.8	0.0339107									0.0339107					0.0339107
				771.5	0	0									0					0.0001
				1562.1	0	0									0					0.0001
				4238.7	584.1	0.137802									0.137802					0.137802
				2706.6	490.4	0.181187									0.181187					0.181187
				1624.3	408.8	0.251678									0.251678					0.251678
				1784.4	634.6	0.355638									0.355638					0.355638
				1079.8	492.7	0.456288									0.456288					0.456288
				1616.2	428.1	0.264881									0.264881					0.264881

[truncated: 2 more sheets: Ratio normalised to mean of WT, Number of UFBs]
