# Supplementary material for: Centromere protection requires strict mitotic inactivation of the Bloom syndrome helicase complex
Source: Research Square preprint supplement (doi:10.21203/rs.3.rs-4420374/v1), 2024-05-30
Supplement: Supplementary file 13 [file Fig 3B. BTRR centromere dynamics (CENPB system).xlsx]

## Sheet: Fig 3Ba CENPB-mCherry-RMI1
													Average
	G2(A)	G2(B)	G2(C)	Prophase	Prometaphase	Metaphase	Anaphase	Telophase	G1(A)	G2(B)	G2(C)			G2(A)	G2(B)	G2(C)	Prophase	Prometaphase	Metaphase	Anaphase	Telophase	G1(A)	G1(B)	G1(C)
5A	1	1.1595	1.24897	1.1013	1.26673	1.02119	0.8291	0.979518	0.895745	1.01925	0.894201		5A	1	1.1595	1.24897	1.1013	1.26673	0.957411	0.921223	0.979518	0.895745	1.01925	0.894201
						0.886498	1.01335						5B	1	1.10639	1.10961	1.09283	1.04067	0.814358	0.76356	0.795913	0.862702	0.863464	0.939184
						0.964543							7A	1	0.907837	0.967424	0.851648	0.740837	0.792472	0.562251	0.753623	0.891674	0.895315	0.972284
5B	1	1.10639	1.10961	1.09283	1.04067	0.927948	0.623477	0.795913	0.862702	0.863464	0.939184		7B	1	0.895108	0.816431	0.778629	0.669661	0.709351	0.7382	0.738294	0.735161	0.693836	0.733478
						0.876646	0.903643						10B	1	0.909924	0.866264	0.917533	0.990283	0.824729	0.981057	0.806884	0.79115	0.579094	0.632841
						0.828809							14A	1	1.099	1.02691	0.95877	0.821015	0.581456	0.485427	0.551314	0.727396	0.722096	0.722117
						0.787165							14C	1	0.973341	0.991347	0.969328	0.858778	0.785356	1.17777	1.46971	1.36237	1.34574	1.27055
						0.79976							Mean	1	1.0073	1.00385	0.952863	0.912568	0.780733	0.804213	0.870751	0.895171	0.874114	0.880665
						0.702558							SEM	0	0.0421188	0.0550623	0.044663	0.0767886	0.0434379	0.0913774	0.110579	0.0822186	0.0959549	0.0805088
						0.777622
7A	1	0.907837	0.967424	0.851648	0.740837	0.822765	0.497415	0.753623	0.891674	0.895315	0.972284
						0.790271	0.627088
						0.764379
7B	1	0.895108	0.816431	0.778629	0.669661	0.766292	0.7382	0.738294	0.735161	0.693836	0.733478
						0.784882
						0.576879
10B	1	0.909924	0.866264	0.917533	0.990283	0.952164	0.880451	0.806884	0.79115	0.579094	0.632841
						0.805983	1.08166
						0.71604
14A	1	1.099	1.02691	0.95877	0.821015	0.719603	0.500427	0.551314	0.727396	0.722096	0.722117
						0.617951	0.470426
						0.406813
14C	1	0.973341	0.991347	0.969328	0.858778	0.769958	0.99609	1.46971	1.36237	1.34574	1.27055
						0.712251	1.35946
						0.876683
						0.739682
						0.8372
						0.776364
	5A	5B	7A	7B	10B	14A	14C	mean	SEM
G2(A)	1	1	1	1	1	1	1	1	0
G2(B)	1.1595	1.10639	0.907837	0.895108	0.909924	1.099	0.973341	1.0073	0.0464047
G2(C)	1.24897	1.10961	0.967424	0.816431	0.866264	1.02691	0.991347	1.00385	0.0635863
Prophase	1.1013	1.09283	0.851648	0.778629	0.917533	0.95877	0.969328	0.952863	0.0374197
Prometaphase	1.26673	1.04067	0.740837	0.669661	0.990283	0.821015	0.858778	0.912568	0.078985
Metaphase	0.957411	0.814358	0.792472	0.709351	0.824729	0.581456	0.785356	0.780733	0.0605404
Anaphase	0.921223	0.76356	0.562251	0.7382	0.981057	0.485427	1.17777	0.804213	0.115935
Telophase	0.979518	0.795913	0.753623	0.738294	0.806884	0.551314	1.46971	0.870751	0.153271
G1(A)	0.895745	0.862702	0.891674	0.735161	0.79115	0.727396	1.36237	0.895171	0.112462
G2(B)	1.01925	0.863464	0.895315	0.693836	0.579094	0.722096	1.34574	0.874114	0.132041
G2(C)	0.894201	0.939184	0.972284	0.733478	0.632841	0.722117	1.27055	0.880665	0.109899

## Sheet: Fig 3BbCENPB-mCherry-BLM(Q672R)
Absolute intensity values. X-axis = cell cycle phase																				Relative values. X-axis = cell cycle phase
CENPB-mCherry-BLM Q672R intensity																		CENPB-mCherry-BLM Q672R intensity
	Scene 10	Scene 17A	Scene 17B	Scene 20A	Scene 3A	Scene 3B	Scene 7	Scene 16	Scene 9New	Scene 11New	Scene 16New	Scene 21New	Scene 23New	Scene 24New	Scene 30New	Scene 38CNew			Scene 10	Scene 17A	Scene 17B	Scene 20A	Scene 3A	Scene 3B	Scene 7	Scene 16	Scene 9New	Scene 11New	Scene 16New	Scene 21New	Scene 23New	Scene 24New	Scene 30New	Scene 38CNew
G2 (A)	133.404	98.0865	74.6095	132.722	670.806	363.886	593.329	378.477		1072.83	433.422	617.572	321.035	210.951		246.785		G2 (A)
G2 (A)	146.596	110.629	86.6666	134.7	584.985	351.865	375.458	534.551	332.203	1061.88	471.876	570.557	337.809	252.57	259.245	342.163		G2 (A)	1	1	1	1	1	1	1	1	1	1	1	1	1	1	1	1
G2 (B)	139.648	140.016	75.8813	162.373	607.874	374.312	376.205	579.998	396.072	1477.38	396.918	627.448	416.478	232.072	472.281	344.153		G2 (B)	0.952604	1.26563	0.875553	1.20544	1.03913	1.06379	1.00199	1.08502	1.19226	1.39129	0.841147	1.09971	1.23288	0.918845	1.82175	1.00582
G2 (C)	169.44	101.82	70.7548	132.677	617.049	336.305	289.645	463.374	345.753	1345.91	399.074	648.056	435.398	241.618	445.082	392.856		G2 (C)	1.15583	0.920373	0.816402	0.984979	1.05481	0.955777	0.771445	0.866847	1.04079	1.26748	0.845717	1.13583	1.28889	0.95664	1.71684	1.14816
Prophase	86.0312	99.8414	73.9452	148.462	676.749	301.08	311.757	401.888	358.46	1741.91	294.258	449.814	469.184	258.024	407.734	369.717		Prophase	0.586861	0.902485	0.853214	1.10216	1.15686	0.855668	0.830337	0.751823	1.07904	1.64041	0.623592	0.788376	1.3889	1.02159	1.57277	1.08053
Prometaphase	96.0595	114.216	67.2475	103.111	521.905	325.604	259.603	524.985	415.82	1382.14	469.432	723.581	577.428	241.451	445.19	323.434		Prometaphase	0.655268	1.03242	0.775933	0.765483	0.892168	0.925366	0.69143	0.982104	1.25171	1.3016	0.994819	1.2682	1.70933	0.955976	1.71726	0.945262
Metaphase	137.431	162.417	76.515	140.196	493.95	381.457	315.122	705.555	589.396	1621.88	684.982	1106.54	740.537	302.336	784.118	709.732		Metaphase	0.937487	1.46811	0.882866	1.0408	0.84438	1.0841	0.839301	1.3199	1.77421	1.52737	1.45161	1.93941	2.19218	1.19704	3.02462	2.07425
Anaphase	175.076	129.262	70.422	97.6195	420.535	295.864	220.066	546.689	653.713	1968.66	497.882	1189.52	924.415	276.217	788.739	701.301		Anaphase	1.19428	1.16842	0.812562	0.724716	0.718882	0.840845	0.586127	1.02271	1.96781	1.85394	1.05511	2.08483	2.7365	1.09363	3.04245	2.04961
Telophase	83.9674	105.494	36.445	113.07	256.077	219.823	247.173	407.492	464.446	1927.46	337.077	437.699	595.382	201.944	366.479	686.754		Telophase	0.572782	0.953578	0.420519	0.839416	0.43775	0.624736	0.658323	0.762307	1.39808	1.81514	0.714333	0.767142	1.76248	0.799556	1.41364	2.0071
G1 (A)	78.4064	88.7169	46.2123	87.4719	281.148	213.699	166.953	330.916	473.056	1423.16	297.035	677.956	575.971	220.304	221.602	471.002		G1 (A)	0.534848	0.801929	0.533219	0.649381	0.480607	0.607333	0.444665	0.619054	1.424	1.34023	0.629476	1.18823	1.70502	0.87225	0.854797	1.37654
G1 (B)	71.4686	106.674	49.8033	78.879	227.105	250.294	184.43	279.845	447.68	1415.34	288.704	495.764	519.762	221.503	348.464	417.636		G1 (B)	0.487522	0.964244	0.574654	0.585589	0.388224	0.711335	0.491215	0.523513	1.34761	1.33287	0.61182	0.868913	1.53863	0.876997	1.34415	1.22058
G1 (C)	47.1861	74.6424	56.2697	90.7104	272.745	199.989	182.129	335.766	384.061	1056.01	310.667	468.951	403.547	194.784	250.793	425.916		G1 (C)	0.321879	0.674707	0.649266	0.673424	0.466242	0.568369	0.485085	0.628126	1.15611	0.994473	0.658366	0.821918	1.1946	0.77121	0.967398	1.24478
G1 (D)	57.1204	89.4448	48.218	89.8635	265.317	209.845	189.138	253.681	457.475	1218.39		442.796		192.727	370.153			G1 (D)
Absolute intensity values. X-axis = cell cycle phase																				Relative values. X-axis = cell cycle phase
GFP-TOP3A intensity																		GFP-TOP3A intensity
	Scene 10	Scene 17A	Scene 17B	Scene 20A	Scene 3A	Scene 3B	Scene 7	Scene 16	Scene 9New	Scene 11New	Scene 16New	Scene 21New	Scene 23New	Scene 24New	Scene 30New	Scene 38CNew			Scene 10	Scene 17A	Scene 17B	Scene 20A	Scene 3A	Scene 3B	Scene 7	Scene 16	Scene 9New	Scene 11New	Scene 16New	Scene 21New	Scene 23New	Scene 24New	Scene 30New	Scene 38CNew
G2 (A)	194.15	80.4726	242.846	204.823	1200.62	1091.73	630.385	305.429		240.752	302.248	505.416	628.19	668.203		440.535		G2 (A)
G2 (A)	236.482	61.7546	239.908	178.117	823.146	1146.99	340.979	405.144	1147.17	238.652	327.105	494.554	717.572	672.382	151.535	557.234		G2 (A)	1	1	1	1	1	1	1	1	1	1	1	1	1	1	1	1
G2 (B)	229.099	116.708	230.905	166.949	758.963	932.44	313.155	442.904	1209.93	342.418	361.2	498.641	697.251	748.705	382.857	246.559		G2 (B)	0.968779	1.88987	0.962473	0.937299	0.922027	0.812942	0.918399	1.0932	1.05471	1.4348	1.10423	1.00826	0.97168	1.11351	2.52652	0.44247
G2 (C)	282.714	73.4731	250.854	227.55	863.208	1186.8	318.599	294.711	882.212	302.998	312.331	269.432	611.608	702.635	288.648	428.044		G2 (C)	1.1955	1.18976	1.04563	1.27753	1.04867	1.0347	0.934365	0.727424	0.769032	1.26962	0.954836	0.544798	0.85233	1.04499	1.90482	0.768159
Prophase	0	75.9642	220.434	168.765	630.393	1115.68	191.68	167.822	646.275	355.714	0	410.868	634.947	859.627	297.829	368.271		Prophase	0	1.2301	0.918827	0.947494	0.765834	0.972702	0.562148	0.414227	0.563364	1.49051	0	0.830785	0.884854	1.27848	1.96541	0.660891
Prometaphase	26.2136	10.7523	127.706	2.65225	214.971	136	12.239	80.0097	427.527	134.134	0	136.195	563.855	108.14	184.531	0		Prometaphase	0.110848	0.174113	0.532312	0.0148905	0.261158	0.118571	0.0358937	0.197485	0.372679	0.56205	0	0.27539	0.785781	0.160832	1.21774	0
Metaphase	59.1073	40.2813	39.904	35.3368	298.689	479.065	61.107	103.708	166.626	144.46	53.2317	156.424	155.574	186.85	145.229	200.863		Metaphase	0.249944	0.65228	0.16633	0.198391	0.362863	0.41767	0.17921	0.255978	0.14525	0.605317	0.162736	0.316293	0.216806	0.277893	0.958381	0.360464
Anaphase	250.116	127.09	185.738	63.9045	487.859	1875.32	77.284	283.159	294.582	348.691	276.276	634.276	557.052	473.189	410.892	240.476		Anaphase	1.05765	2.05798	0.774207	0.358778	0.592676	1.63498	0.226653	0.69891	0.25679	1.46109	0.844612	1.28252	0.776301	0.70375	2.71153	0.431552
Telophase	230.117	92.0678	156.683	193.804	737.623	1721.33	265.362	469.963	779.85	427.742	275.711	658.222	643.469	457.836	383.993	597.501		Telophase	0.973081	1.49087	0.653096	1.08807	0.896102	1.50073	0.778236	1.15999	0.679802	1.79233	0.842885	1.33094	0.89673	0.680916	2.53401	1.07226
G1 (A)	253.177	103.811	191.491	154.568	596.293	1912.57	188.864	435.347	1180.33	253.664	227.201	597.758	632.966	476.03	208.101	534.387		G1 (A)	1.07059	1.68102	0.798186	0.867787	0.724408	1.66746	0.553886	1.07455	1.0289	1.0629	0.694583	1.20868	0.882094	0.707976	1.37328	0.959001
G1 (B)	232.059	98.8415	173.835	132.088	421.284	1376.99	240.534	311.531	1137.97	289.842	203.595	823.453	614.33	500.651	236.274	668.282		G1 (B)	0.981293	1.60055	0.724591	0.741579	0.511798	1.20052	0.705423	0.768939	0.991975	1.2145	0.622415	1.66504	0.856123	0.744594	1.5592	1.19928
G1 (C)	89.3342	71.009	153.095	221.49	668.373	1202.12	293.176	309.836	1100.14	275.393	356.134	458.251	625.928	518.072	299.503	903.533		G1 (C)	0.377762	1.14986	0.63814	1.24351	0.811973	1.04806	0.859808	0.764757	0.959003	1.15395	1.08875	0.926594	0.872286	0.770503	1.97645	1.62146
G1 (D)	85.3276	95.8802	219.165	74.6158	481.559	1227.91	308.683	215.362	1099.76	261.966		595.96		302.674	236.696			G1 (D)
																	Ratio	GFP-TOP3A/CENPB-mCherry-Q672R
																			Scene 10	Scene 17A	Scene 17B	Scene 20A	Scene 3A	Scene 3B	Scene 7	Scene 16	Scene 9New	Scene 11New	Scene 16New	Scene 21New	Scene 23New	Scene 24New	Scene 30New	Scene 38CNew		Mean	SEM
																		G2 (A)	1	1	1	1	1	1	1	1	1	1	1	1	1	1	1	1		1	0
																		G2 (B)	1.01698	1.49323	1.09927	0.777558	0.887309	0.764192	0.916574	1.00754	0.884627	1.03128	1.31277	0.916844	0.788138	1.21186	1.38686	0.439911		0.995934	0.0661474
																		G2 (C)	1.03432	1.29269	1.28077	1.29701	0.994177	1.08257	1.21119	0.839161	0.738893	1.00169	1.12902	0.479648	0.66129	1.09236	1.10949	0.669038		0.994583	0.062287
																		Prophase	0	1.36301	1.0769	0.859667	0.661991	1.13677	0.677011	0.550964	0.522098	0.908625	0	1.05379	0.637088	1.25146	1.24964	0.611635		0.785041	0.102158
																		Prometaphase	0.169164	0.168646	0.686028	0.0194524	0.292723	0.128134	0.0519122	0.201083	0.297736	0.431814	0	0.21715	0.4597	0.168239	0.709121	0		0.250057	0.0554376
																		Metaphase	0.26661	0.444298	0.188398	0.190614	0.429738	0.385269	0.213524	0.193938	0.0818674	0.396314	0.112107	0.163088	0.0988998	0.23215	0.31686	0.17378		0.242966	0.0295317
																		Anaphase	0.885599	1.76133	0.952797	0.495061	0.824441	1.94445	0.386696	0.683393	0.130495	0.7881	0.800495	0.615167	0.283684	0.643502	0.891232	0.210553		0.768562	0.123426
																		Telophase	1.69887	1.56344	1.55307	1.29623	2.04707	2.40218	1.18215	1.52168	0.48624	0.987435	1.17996	1.73493	0.508789	0.851618	1.79254	0.534235		1.33378	0.140383
																		G1 (A)	2.00168	2.09622	1.49692	1.33633	1.50728	2.74555	1.24563	1.7358	0.722543	0.793077	1.10343	1.01721	0.51735	0.811666	1.60656	0.696673		1.33962	0.151173
																		G1 (B)	2.01282	1.6599	1.26092	1.26638	1.31831	1.68769	1.43608	1.4688	0.736099	0.911192	1.01732	1.91623	0.55642	0.849026	1.15999	0.982554		1.26498	0.104559
																		G1 (C)	1.17362	1.70423	0.982864	1.84655	1.74153	1.84398	1.77249	1.21752	0.829512	1.16037	1.65371	1.12736	0.730189	0.999082	2.04306	1.30261		1.38304	0.103126

## Sheet: Movie 5A
Movie	5A
Timepoint	13	G2	14	G2	15	G2	16	prophase	17	prometa	18	meta	19	meta	20	meta	21	anaphase	22	late ana	23	telophase	24	G1	25	G1	26	G1
	RFP-RMI1	GFP-TOP3A
Background	921.5	7912	964.8	8523.7	1031.1	9191.3	971	8879.4	972.8	8029.4	994.4	9105.2	971.2	8678.5	950.6	8162	1001.6	8903	967.6	7895.7	995	7923	1070.4	9261.8	982.9	7806.2	964.7	8390
	1085.1	10578.4	1085.5	10397.2	1159.2	11833.4	1148.2	12432.2	1210.8	12004.3	1594.7	16653.3	1349.4	12875.7	1802.3	18159.5	1536	14358.5	1741.6	17553.1	1453	13846.8	1452.3	14552.3	1406.2	13047.8	1288.9	11932.5
	1214.7	12231.2	1420	14586	1108.1	10139.3	1226	13015.3	1292.8	11820			1708.9	17260.4	1396	13569.3					1432.8	12909.1	1397.3	12438.3	1431.6	13521.3	1318.3	11714.9
	1061.8	9734.8	1170	12450.2	1163.6	11104.6	1129.5	10529	1278.4	13037.8			1333.7	12036.7							1484.8	14269.1	1354.8	12417.8	1263	11073.9	1292.8	11296.5
	1218.9	11712.5	1459	14124	1249.5	12683.7	1129.5	10042.3	1208.6	10595.9											1586.3	15433.4	1394	12770	1386.2	12400	1293	10901.2
	1063.4	10348.2	1117.5	11438.7	1186.4	11698.6	1189.2	11217.4	1061.5	9845.1											1265.1	11161.9	1415	13093.8	1356.9	12641.5	1159	9912
	1073	9356.7	1101	10842.5	1208.6	12991	1389.4	14321.4	1305	13069.3											1606.5	15480.4	1509.8	14935.2	1214.1	11191.1	1198.8	11467.8
	1098.2	10674	1094.8	10416.8	1186	12078.8	1343.8	14514.8	1092.3	9722.4											1544.8	13680.8	1565.6	15040.5	1530.7	14906.6	1469.7	14278.3
	1130.1	10994.9	1153.5	11392	1357	13296.5	1248.3	12790.9	1119.2	11474.5											1552.7	14814.3	1381.4	11353.4	1313	11645.8	1301.5	12724.8
	1038	9490	1127.7	11462	1226.4	12201.3	1149.4	11769.8	1145.3	11476.7											1515.5	14332	1222.8	11255.6	1384.7	13133.7	1528.6	14975.6
	1132.2	10524.9	1102.8	10935.6	1090.5	11044.5	1454.5	15943.9	1383.2	14267.6											1505	14029	1487	14511	1307	12017	1432.7	14366.7
	1052	9610	1214.1	12195.7	1278.6	13447.2	1226	13511.8	1367.8	14013.6											1527.5	13880	1269.4	11630.3	1311	11991	1358	13098
	1179.2	11652.8	1196	12472	1208	13082	1300.3	13524.9	1118.8	10500.7													1495.9	14538.9	1324.8	12625.4	1426	13741
	1090	8832.5	1290	13918.9	1561	16186	1142	10250	1369	14304													1257	10867.7	1299.1	12028.6	1261.1	11646.2
	1019.5	8475	1170.6	11596.6	1122.3	11054.9	1258.8	13842	1213.9	12361.4													1539.5	14724.2	1484.8	14089.1	1354.5	12863
	1083.6	8597.4	1555.5	16982.8	1153.2	10705.1	1319	14160.5	1064.8	9686.2													1568	15494	1643	16651.6	1457	13636.1
	1345.9	13214.3	1217.1	12653.7	1545	17474	1193	10925	1233	12277													1264.5	11376.7	1284.8	11373	1494.5	14696.1
	983	8579	1189.9	11428	1234.6	12433.5	1112	9679	1516	16476.2													1308.1	12010.7	1230.2	11140	1482.1	15250.6
	1146.5	11613.8	1163.6	12045.2	1350.5	14932.9	1112	9108	1402.2	15687													1218	11167	1188	10819	1467	12513
	1103.3	10963.9	1195	12518.5	1415.2	15425.2	1038.6	9844.1	1194.8	11504.8													1246.1	10696.4	1317.5	11050.2	1187.5	10621.5
	1077.6	10053	1310.5	13006.5	1639	15629	1193.5	12738.4	1410.9	14474.8													1534	15647.3	1163.9	10627.9	1261.6	11995.2
	1035	8548	1373.2	13935.2	1460	15843	1266.5	12640.3	1398	13526													1399.6	13266.4	1303.5	12529	1324	12517
	1182.4	11156.5	1383.7	14097.3	1498.5	16004.5	1274.7	14322.6	1171.5	13138													1241.8	11450.2	1228.2	11978	1357	11899.5
	990	8748.5	1291	11735.5	1236	13338	1328.4	13960.3	1371.1	14801.3													1563.4	14968.4	1289	11953	1449	13796.4
	975	8268	1363	14984.4	1418	14644.3	1293.3	12676.6	1177	10936.5													1533.2	13978.6	1305.8	12372.9	1289.5	11303.5
	1275	12770.6	1443.4	15193.9	1500.7	15341.4	1344.6	13740.8	1421.5	15097.8													1375	12521	1410.7	12331.7	1339.6	13117.7
	1136.5	11258.2	1376.6	13854.9	1227.8	12107.2	1172.5	9990.5	1275.3	12269.7													1373	11667	1384	11809
	1305.2	13694.8	1323	14082.7	1612.5	18139	1388.3	14515.9	1264.7	12358.3													1439.5	12208	1433.4	12966.9
	1409.8	14699	1496.9	16908.8	1311	12962	1481.5	16454.6	1132.1	10187.3													1576.1	14854.6	1405.5	12577.8
	1503.8	15095.8	1347	12025	1371.5	14406.5	1236	11477	1299	11197													1495.2	13972.1	1325.5	11546.5
	1481.3	14465.7	1124	10348	1602	17927	1117	9721															1343.5	10891.5	1343	11248.5
	1379.4	14391.7	1111.8	10625.9	1187	11806	1069.5	9658															1495.1	13998.9	1244.8	10705.1
	1438	15129	1321.2	13093	1116.8	10430.2	1338.8	14934															1271.1	10986.3	1260	11444.8
	1328.6	13018.4	1073.8	10316.6	1231.9	12405.4	1251.4	12965.3															1504.6	14669.4	1244.3	10914.3
	1063.5	8814	1420.8	15200.4	1398.1	14268.4	1092.5	11513.5															1222	10089	1297.1	12584
	1098.8	10127	1098.5	9257.5	1189.5	12040.5	1338.4	13701.5															1388.4	12643	1316.1	11765.1
	1051	8910	1178.7	11313.5			1122	10314															1438.2	13515.8
	1069	8691.3	1191	11150			1106.9	10723.2															1255.7	10844.7
	1268	13175	1147.9	10809.1			1277.7	14184															1273.5	11601
	1047	8597	1197	12671			1075.4	10295
	1051	8573	1202	12477			1118.9	10849
	1064.3	10397.7					1153.3	11464.8
	1100	8654
	1352.7	13846.3
	1075.5	9180
	1383.9	14543.8
	1014	8267.7
	1057	8740.5
	1157.2	10796.7
	992.5	8390
	1039.7	9297
	1019	8744
	1123.7	10981.6
	1201.6	11087.2
	1176.5	10972.7
	1082	9082
average	1147.71	10697.3	1244.97	12523.6	1308.69	13460.1	1223.19	12299.1	1258.57	12486.6	1594.7	16653.3	1464	14057.6	1599.15	15864.4	1536	14358.5	1741.6	17553.1	1497.64	13985.2	1396.56	12859.1	1332.33	12191.5	1351.67	12650.6
Bg corr	226.207	2785.27	280.165	3999.87	277.586	4268.84	252.185	3419.69	285.769	4457.19	600.3	7548.1	492.8	5379.1	648.55	7702.4	534.4	5455.5	774	9657.4	502.636	6062.16	326.163	3597.33	349.426	4385.26	386.968	4260.6
ratio	12.3129		14.2768		15.3785		13.5602		15.5972		12.5739		10.9154		11.8763		10.2086		12.4773		12.0607		11.0292		12.5499		11.0102
Rel RFP	1		1.23853		1.22713		1.11484		1.26331		2.65376		2.17853		2.86706		2.36244		3.42164		2.22202		1.44188		1.54471		1.71068
Rel GFP	1		1.43608		1.53265		1.22777		1.60027		2.71		1.93127		2.7654		1.9587		3.46731		2.17651		1.29155		1.57445		1.52969
Rel to G2	1		1.1595		1.24897		1.1013		1.26673		1.02119		0.886498		0.964543		0.8291		1.01335		0.979518		0.895745		1.01925		0.894201
Timepoint	13	G2	14	G2	15	G2	16	prophase	17	prometa	18	meta	19	meta	20	meta	21	anaphase	22	late ana	23	telophase	24	G1	25	G1	26	G1
	RFP-RMI1	GFP-TOP3A	RFP-RMI1	GFP-TOP3A	RFP-RMI1	GFP-TOP3A	RFP-RMI1	GFP-TOP3A	RFP-RMI1	GFP-TOP3A	RFP-RMI1	GFP-TOP3A	RFP-RMI1	GFP-TOP3A	RFP-RMI1	GFP-TOP3A	RFP-RMI1	GFP-TOP3A	RFP-RMI1	GFP-TOP3A	RFP-RMI1	GFP-TOP3A	RFP-RMI1	GFP-TOP3A	RFP-RMI1	GFP-TOP3A	RFP-RMI1	GFP-TOP3A

## Sheet: Movie 5B
Movie	5B
Timepoint	9	G2	10	G2	11	G2	12	prophase	13	prometa	14	meta	15	meta	16	meta	17	meta	18	meta	19	meta	20	meta	21	anaphase	22	late ana	23	Telo	24	G1	25	G1	26	G1
	RFP-RMI1	GFP-TOP3A	RFP-RMI1	GFP-TOP3A	RFP-RMI1	GFP-TOP3A	RFP-RMI1	GFP-TOP3A	RFP-RMI1	GFP-TOP3A	RFP-RMI1	GFP-TOP3A	RFP-RMI1	GFP-TOP3A	RFP-RMI1	GFP-TOP3A	RFP-RMI1	GFP-TOP3A	RFP-RMI1	GFP-TOP3A	RFP-RMI1	GFP-TOP3A	RFP-RMI1	GFP-TOP3A	RFP-RMI1	GFP-TOP3A	RFP-RMI1	GFP-TOP3A	RFP-RMI1	GFP-TOP3A	RFP-RMI1	GFP-TOP3A	RFP-RMI1	GFP-TOP3A	RFP-RMI1	GFP-TOP3A
Background	950.8	8108.4	930.7	8139	905	7984.4	942.7	8596	876.4	7237.9	946.3	8492	946.6	8496.8	961.8	8660.8	964.9	8592.5	1043.5	9521.1	1010.9	9191.5	995.4	8867.9	946.8	8049.5	994.6	8510	1041.7	8799.4	986.7	8075.6	965	7966.3	920.6	7322.8
	1322.4	12280	1265	13182.3	1347.3	13169.3	1130.9	11088.2	1415.5	13895.5	1713.3	18277.9	1763.6	17468.6	1859	18829.4	1966.6	19416.3	1796.5	17230.4	1769.8	16809.4	1847.8	16804	1474	10034	1758.4	17081.5	1488.6	13766.8	1375.5	12431.2	1170	10033	1094.3	9494.7
	1312.5	11609.5	1137.8	11651.2	1273	13537.4	1068.5	11018.3	1432.4	13874.1	1482.2	13035	1799.2	18032.4	1617.3	14791.4	1833.8	17869.9	1642.5	15160.2	1725.7	15610	1877.8	17970.5	1524.2	13359.9			1303.6	10757.6	1366.4	13191	1138.6	10549.8	1132.3	9961.3
	1223.7	10401.7	1244.8	13078	1222	11645	1027.5	10238	1461.5	14907.3	1582.2	17604	1686	17205	1830.5	18575.7	1536.9	13203.6	1753.9	16794.5	1757	15227.4	1607.7	14677.5	1497.9	12401.8			1318.4	10902.8	1286.9	10773.6	1236.7	11798.9	1161.5	10954.2
	1330.5	12800	1271.1	13369.6	1272.6	12532.6	1179.2	11846.6	1549.5	16674.5	1594.2	15546.5	1679.5	14605.5	1643.5	14961.3	1695.2	15894.9	1720.5	16585.8	1772.8	16548	1590.6	14917.6	1411.6	11283.2			1255.6	9812.1	1160.8	9198.6	1078	9087	1162.8	10775.8
	1383.2	13697.5	1106	11858	1227.8	13321.3	1027.4	9928	1415	13997.3	1633.7	16390	1719	17818.3	1636.6	16563.1	1679	16740.8	1696	15523.2	1908.6	16952.9	1801.5	16395.3	1392.3	12186.4			1540.9	14105.9	1167	9656.2	1247.4	11656.5	1151	10118.1
	1243	12763.3	1304.7	13776.7	1127	10676.5	1326.1	13790.7	1330	15627	1590.2	15599.4	1684.9	16503.4	1677.7	15960.5	1591	12548			1657	13486	1736.9	16514.7	1485.2	12426.3			1464.4	13032.2	1454.5	13062.5	1219.9	10943.8	1148.3	10209
	1296.2	12264.2	1116	11718.3	1212.6	12687.5	1308.1	14488.3	1612.1	18357	1682	17433.3			1710.4	16020							1633	15021.5	1397	11022			1418.9	12640.3	1324.3	11901.3	1242.4	10905.4	1101.1	9570.1
	1347.9	13263.6	1459.6	15589.1	1409.8	14650.2	1196.6	12686.3	1356.5	11891	1539	13576			1660	14756							1783.3	16359.1	1535.8	12916.8			1405.3	12972.4	1397.4	12343.7	1172	10019	1176	9761
	1268.3	11185	1146	11441.1	1164.2	11047.4	1107.2	11037	1332.5	12850.5	1579.5	15450.5			1654	15760							1748.9	15553.4	1509.1	13388.4			1437.4	12954	1376.2	11460.3	1116	9230	1068.7	8440.3
	1356.3	12476.3	1264.9	12479.3	1267.9	12818.4	1315.5	12891	1196	11775	1672.7	18135													1457	11606			1594.2	14901.1	1262.7	10963.8	1246.8	10942.4	1194.6	10622
	1268.6	12004.5	1073.8	11476.5	1199	12512.5	1259.5	14370.5	1352.1	15598.6															1523.3	12727.7			1605.2	13834.8	1203.2	9714.5	1060	7888	1089.1	9321.2
	1437.1	14082.1	1248.5	12897.9	1163.8	10646.6	1247	11712	1315.5	11072.5															1520.7	12536.3			1723.7	16206.6	1346.2	12493.2	1103.2	8897.6	1110.5	9170
	1361.3	13040.8	1532	15015	1391.2	15830	1193.6	12890.8	1663	18723.2																			1512.8	13307.7	1161	10339.6	1079.8	8895.2	1176.5	9543.5
	1463	15397.9	1266.9	12339.6	1225.9	12960.8	1349.3	15131.7	1195.7	10134																			1558	13614.5	1514.5	14434.6	1152	9061	1074	10179.5
	1187.1	10983.9	1336.5	12015	1211.3	12023.5	1027.1	9260.6	1421	13081.5																			1523.8	13680.2	1442.1	13652.5	1373	13259.7	1105	9674.5
	1424.3	14503.5	1237.6	12129.2	1244.3	11927.7	1165	10926.6	1554.5	16434																					1214.5	10011.5	1365.7	11590.7	1096.5	9853.5
	1308.8	12062.8	1390.1	14456.4	1223.4	12934.6	1413.6	15057.8	1398.5	13586																							1379.7	13002.7	1232.7	11789.4
	1443.8	14399.4	1090.5	10511.6	1324.9	13903.3	1430.2	14382.2	1210.9	10910.6																							1273	11760.9	1220.9	11315.7
	1167.6	10758.2	1417.5	14482.3	1322.1	13725.1	1387.7	14304.2	1099	11578																							1301	11969.6	1172.3	10346.3
	1268.2	14127.5	1138.2	11482.2	1247.2	12185.8	1286.8	13479	1473	13590																							1285.5	10792.5	1217.8	11376.2
	1127	12006	1392.7	13942.3	1366	13946	1399	15414	1138.2	10881.8																							1159	9241	1122	9812
	1190.5	12794	1138.7	10038.7	1230.6	12819.9	1102.2	11387.4	1556	17842.4																							1466.2	13961.7	1104.1	9740.4
	1136	8750	1430.6	15588	1092.8	10907.7	1425.6	15130.7	1354	11787																							1224.3	9697.3	1071.7	9758
	1162.5	9770	1314.5	13674.5	1154.8	10845.9	1343	12710	1480	12750																							1472.8	14312	1254	9680
	1353.7	13364.7	994.6	8361.9	1388	14801.3	1425.5	15696.5	1482	14702																							1428.7	13627.2	1373	11671.7
	1174.3	11847.6	1068.2	9950.6	1058	10391.5	1412	17400	1423.3	15502.3																							1405.7	12898.7	1248	10346
	1144.8	10273.9	1054	8996	1453	16025.3	1204.6	11965.4	1440	15545.5																							1381	11888	1371	12984.5
	1294	12314.3	1033	10257.8	1017.5	9993	1332	12091	1353.3	13409.6																									1202.5	10097.2
	1039.9	10025.8	1094.9	10587.9	1127.8	10408.4	1360.5	14205.9	1485.4	14828.4																									1368	11282
	1210.8	10903.6	1194	11129	1140.8	10843.6	1385	14241	1235	11586																									1203	9767
	1113	9027	1223.6	12715.8	1109.2	11391.8	1398	14299	1461.5	15945.4																									1396.1	13496.4
	1302.8	12320	1173.7	10985.7	1134.4	11711.6	1313.6	13720	1334	11287																									1414.1	13766
	1083	10015.6	1043	9078	1048	9144	1356	12848																											1350.9	12314.5
	1214.2	12025.6	1201.3	11394	1067.4	10226.6	1309	12872																											1340	11222
	1104.6	10066.2	1117	10174.4	1160.8	11248.7	1107	11103																											1367	12773.5
	1004.8	7777.2	1213.5	11151.5	1142.6	11716.8	1153.4	11640.7
	991	8045	1068.2	9693.3	1270.2	12973.2	1086.7	11293
	1008	8046	1059.7	10830	1286.7	13752.9	1223.9	12044.7
	1092.7	10537.6					1112.5	9987.5
	1058.2	9260.9					1251.3	12088.7
average	1230.49	11581.8	1206.91	11934.2	1219.1	12312.7	1253.69	12816.7	1391.47	13894.5	1606.9	16104.8	1722.03	16938.9	1698.78	16246.4	1717.08	15945.6	1721.88	16258.8	1765.15	15772.3	1736.39	16023.7	1477.34	12157.4	1758.4	17081.5	1476.72	13099.3	1315.83	11601.8	1251.05	11033.7	1202.04	10605.4
Bg corr	279.69	3473.42	276.213	3795.18	314.103	4328.33	310.99	4220.66	515.066	6656.63	660.6	7612.76	775.433	8442.07	736.978	7585.58	752.183	7353.08	678.38	6737.72	754.25	6580.78	740.989	7155.83	530.542	4107.9	763.8	8571.5	435.02	4299.87	329.125	3526.16	286.052	3067.39	281.437	3282.56
ratio	12.4188		13.74		13.78		13.5717		12.9239		11.524		10.8869		10.2928		9.77565		9.93207		8.72494		9.65714		7.74284		11.2222		9.8843		10.7137		10.7232		11.6636
Rel RFP	1		0.987569		1.12304		1.11191		1.84156		2.3619		2.77247		2.63498		2.68935		2.42547		2.69674		2.64932		1.89689		2.73088		1.55536		1.17675		1.02275		1.00625
Rel GFP	1		1.09263		1.24613		1.21513		1.91645		2.19172		2.43048		2.18389		2.11696		1.9398		1.89461		2.06017		1.18267		2.46774		1.23794		1.01518		0.883104		0.945051
Rel to G2	1		1.10639		1.10961		1.09283		1.04067		0.927948		0.876646		0.828809		0.787165		0.79976		0.702558		0.777622		0.623477		0.903643		0.795913		0.862702		0.863464		0.939184
Timepoint	9	G2	10	G2	11	G2	12	prophase	13	prometa	14	meta	15	meta	16	meta	17	meta	18	meta	19	meta	20	meta	21	anaphase	22	late ana	23	Telo	24	G1	25	G1	26	G1
	RFP-RMI1	GFP-TOP3A	RFP-RMI1	GFP-TOP3A	RFP-RMI1	GFP-TOP3A	RFP-RMI1	GFP-TOP3A	RFP-RMI1	GFP-TOP3A	RFP-RMI1	GFP-TOP3A	RFP-RMI1	GFP-TOP3A	RFP-RMI1	GFP-TOP3A	RFP-RMI1	GFP-TOP3A	RFP-RMI1	GFP-TOP3A	RFP-RMI1	GFP-TOP3A	RFP-RMI1	GFP-TOP3A	RFP-RMI1	GFP-TOP3A	RFP-RMI1	GFP-TOP3A	RFP-RMI1	GFP-TOP3A	RFP-RMI1	GFP-TOP3A	RFP-RMI1	GFP-TOP3A	RFP-RMI1	GFP-TOP3A

## Sheet: Movie 10B
Movie	10B
Timepoint	15	G2	16	G2	17	G2	18	prophase	19	prometa	20	meta	21	meta	22	meta	23	anaphase	24	late ana	25	telophase	26	G1	27	G1	28	G1
	RFP-RMI1	GFP-TOP3A	RFP-RMI1	GFP-TOP3A	RFP-RMI1	GFP-TOP3A	RFP-RMI1	GFP-TOP3A	RFP-RMI1	GFP-TOP3A	RFP-RMI1	GFP-TOP3A	RFP-RMI1	GFP-TOP3A	RFP-RMI1	GFP-TOP3A	RFP-RMI1	GFP-TOP3A	RFP-RMI1	GFP-TOP3A	RFP-RMI1	GFP-TOP3A	RFP-RMI1	GFP-TOP3A	RFP-RMI1	GFP-TOP3A	RFP-RMI1	GFP-TOP3A
Background	866.3	6819.2	866	6797.1	851.5	6624.4	818.5	6182.1	841	6125.7	871.5	6751.9	843.9	6571.4	875.3	7410.9	873.2	6642.2	819.4	5854.2	840.2	6337.4	820.7	6046.9	820	6304.3	861	6548.8
	968.4	8223.8	1015.1	8772.9	970.6	8241	1034.7	8996.5	1153	9373.7	1144.6	10278.5	1301	11797.5	1345.7	11824.4	1166.7	9818.4	1205.6	10988.7	1031	6343	935	7016	897.7	6863.2	899.4	6563.8
	1044.9	10109.2	996	9160.6	1049.7	9758.2	1024	7995.2	1197.8	11002.1	1103.5	8744.5	1196.9	10208.6	1305	10938.3					1016.2	8473.7	904	6012	1049	8042	899.6	6236.7
	915	7322	948.5	7145.5	957.6	8122.9	1032.5	8303	1097	8914	1181.3	10620.1	1234.2	10830.8	1330.5	10195.5					1027.1	7835.6	937.3	7190.5	997.5	7735.8	922	6290
	1008.9	8672.8	945	6429	906	6050	876	6190	1083.8	9673.6	1097.5	9869.5	1191	8779	1417.7	12466.5					1189.2	10013.4	1031.5	7928.8	1006.5	7975.2	943.5	7215.8
	978	7256	1032.9	8858	983	8023	925.9	7590.5	966.9	6991.9	1178.5	10021.7			1374.4	12398.7					1109.3	9130.8	1060.5	8718.7	919.8	6312	987.8	7777.4
	977	7974	1027.2	8863	1001.4	8541	900.1	7086.8	1104.1	9598.1					1329.1	11730.1					1185	10417.8	1075.5	8725.8	1037.5	8591.7	959.3	7765
	1058.8	9198	1062.1	9070.4	967	7747.8	1055	8616.8	946	7725.4											976.4	7873	1111	7894	898.7	6576.3	889.6	6384.8
	1024.6	8995.7	1240.1	12149.5	920	8282	1122.2	10354	887.5	6617											1080.6	8992.6	1049.5	8982	980	6905.3	1043.6	8609.9
	1006.4	8767.6	1072	8662.5	1247.5	11631.2	948	7696.9	1079.5	8990.8											1026.4	7631.4	977	6921	1007.5	8388.1	917	8103
	1065.7	10009.4	1053.7	10165	959	7372	1152.7	9515.3	1044	8667											1113	10418	963.5	6471.5	944.5	6503.5	915	7276
	1038.5	9467.9	1056.5	9116.8	1019.3	8936.2	981.8	7322.9	1062	9006.1											1076	8495	925	6420	996	7307	948.4	6780.8
	956.6	7687	1204.3	11604.4	1301.8	12288.2	1109.5	9928.2	936.3	7550.2											1114	8740	1006.2	8128.8	1011.1	7982.1	962	7534
	1027.7	9471.4	1100.2	9863	919	6956	859	6279	1076.2	8422.5											1099.2	9249.9	992	8167.4	936.2	6952.2	922	7112
	937.4	7551.5	1161	8557	999.7	8066.2	1024	8499	902.5	6801											1054.5	8622	975	7516	945.7	7641.8	915	7134
	943.5	6546	972.3	7627	976	6490	1109.2	9268	1099.8	9078.4											959.5	7378.5	977.7	7830.7	1000	7146	1011.5	8186.2
	1016.8	8873.3	976.8	8096.3	1000	8312.8	1047.7	9347.6	1090.5	9439.4											1037	7893	1026.6	8096.7	916.8	6708.2	930	6383
	948.5	8612.5	1124.5	9561.5	945.8	7548.2	838	5923	1105.7	9320.2											1077	8392	976	7368	1001.4	8045.5	1009.1	8055.8
	909	8173	913	6854	983.3	7966.7	942.7	6656.3													1040.4	8644	1012	7104	908.6	6610.7	948.5	6882.5
	905	6555	981	8611.2	1092.1	9528.7	929	7730													1082.9	9462.9	973	8288	896	6122	985.8	7677.1
	930.7	7572.7	930.9	7732.4	947.3	7570	978.6	8791.7													990.6	7242.4	966	7140	947.5	7083	978.3	7824
	937.7	7852.5	906	6331	935	6884	985	8841.9													987.9	8156.4	961	7400	976	7837	993	7338
	940.1	7698.2	864.2	6214.4	969.2	7372.2	1091	10546													1025.2	8519.9	1008	8609	975.2	7416	886	6124
	895.5	7150	939	7722.5	963.3	8000.7	1002.7	8144.2													1044	8804	1006.4	8209.8	900.1	6779.9	907.8	6710.7
	867	6530	954	7175	922	6192	1002	7839													986	7193	998.6	8093.6	939	6837.9	924	7141.7
	890	6084	889.7	6642.9	905.3	7526.7	988	8184													1006	6981	969	7816	967.5	7711	885	6837
	938.7	8008.8	894	6954	1001.8	8270.5	962.9	7771.8													1004.3	7730.6	974	7397	919	6869.9	935.5	7077.1
	890	7233	951.6	8076.8	962	7564	1015.8	8490.9													997.8	8521.1	997.1	8345	883	6613.5	976	8664
	886	6986	867.7	6878.3	926.8	7414.2	988.6	8463.8															981.3	8094.4	906	6267	920	5944
	890	6579	948.1	8406.1	972.3	8303.3	926.9	6895.4															968	8689	938	7903	953.3	7303.7
	866	6275	862	6419	971.5	7284.5	944.5	7783.9															970	7755	918	6554	914.9	6787.7
			867	6551	917	6720	914.8	7094.9															1001.6	8268.3	954.2	7923.2	926.5	7695.2
			864	6948	919	8729	985.2	8098.2															1024	7507	991.9	8164	887.4	6031.6
					972.5	7593.5	961.5	7646.2															1083.4	9044.6	905.6	6804	948.9	7417.2
							948.4	7586.4															974	7844	913	6585	921	7065
							924	7185.3															972	7846.5	935.5	7113	959.2	7063.5
							950.3	7740.5															1051.9	8847.5	938.7	7048.4	974	7194
							901.6	7427.7															972.1	7724.4	878.5	6871.5	926	7278.5
							903	6906															968	6176	954.7	7060.3	881	5855
							906	7090.2															973.8	8009.9	964.8	7031	956.7	7047.7
																							942	6643	969	6726	1012.5	8563.2
																							949	6915	964.5	6560.5	944.8	7098.2
																							950.5	6800	967	6983	957.4	7199.5
																							964	6912	996.8	7866	924.2	7176.4
																							930	6783	975.1	8032.8	903.5	7013
																							935	7679	975.8	7500.7	926.5	6152.5
																							900	6182	984.4	7961.3	975.9	7434.3
																							935	7119	957	6735	970	7012
																							944.1	7058.8	985.6	7650.3	931	7526.5
																							956.8	7630.8	1025.8	8401.8	936	7539
																									1003.5	7827.2	997.2	8236.2
																									945.5	7154.5	936.7	7687
																									944.1	7730.6	889.7	7196.2
																									915.1	6944.2	992.8	7340.2
																									1003.3	8428	880	6673
																									938.2	7039.3	1001.5	8219.4
																									946	6811.5	924.2	7129.6
																									954.9	7538.3	919	6583.5
																									987	7070	924	6225
																									1057	8285.3	911	6702
																									1030	7658	966.4	7421.2
																									940	7084.3	1050	7726
																									901.5	7159	975	8204
																									880	6507	908.8	6714.3
																									928.8	7573.8	903	6640.3
																									919.5	7168.6	898	7121
																									919	6828	900	6642
																									930	6875.8	898.2	6775.4
																									916.3	6945.3	882.6	6657.2
																									908	6560
																									892	7123.5
																									900	6883
average	955.413	7914.51	988.138	8163.09	984.358	8038.99	979.303	7995.56	1048.98	8657.14	1141.08	9906.86	1230.78	10404	1350.4	11592.2	1166.7	9818.4	1205.6	10988.7	1049.5	8413.15	982.345	7618.77	952.358	7246.39	939.757	7161.4
Bg corr	89.1133	1095.31	122.138	1365.99	132.858	1414.59	160.803	1813.46	207.976	2531.44	269.58	3154.96	386.875	3832.57	475.1	4181.35	293.5	3176.2	386.2	5134.5	209.3	2075.75	161.645	1571.87	132.358	942.092	78.7574	612.604
ratio	12.2912		11.1841		10.6474		11.2776		12.1718		11.7032		9.90649		8.80099		10.8218		13.2949		9.91757		9.72419		7.11777		7.77838
Rel RFP	1		1.37059		1.49088		1.80447		2.33384		3.02514		4.34138		5.33141		3.29356		4.33381		2.34869		1.81392		1.48527		0.883789
Rel GFP	1		1.24713		1.2915		1.65566		2.31116		2.88043		3.49908		3.8175		2.89982		4.68771		1.89512		1.43509		0.860114		0.559298
Rel to G2	1		0.909924		0.866264		0.917533		0.990283		0.952164		0.805983		0.71604		0.880451		1.08166		0.806884		0.79115		0.579094		0.632841
Timepoint	15	G2	16	G2	17	G2	18	prophase	19	prometa	20	meta	21	meta	22	meta	23	anaphase	24	late ana	25	telophase	26	G1	27	G1	28	G1
	RFP-RMI1	GFP-TOP3A	RFP-RMI1	GFP-TOP3A	RFP-RMI1	GFP-TOP3A	RFP-RMI1	GFP-TOP3A	RFP-RMI1	GFP-TOP3A	RFP-RMI1	GFP-TOP3A	RFP-RMI1	GFP-TOP3A	RFP-RMI1	GFP-TOP3A	RFP-RMI1	GFP-TOP3A	RFP-RMI1	GFP-TOP3A	RFP-RMI1	GFP-TOP3A	RFP-RMI1	GFP-TOP3A	RFP-RMI1	GFP-TOP3A	RFP-RMI1	GFP-TOP3A

## Sheet: Movie 14A
Movie	14A
Timepoint	3	G2	4	G2	5	G2	6	prophase	7	prometa	8	meta	9	meta	10	meta	11	anaphase	12	late ana	13	telophase	14	G1	15	G1	16	G1
	RFP-RMI1	GFP-TOP3A
Background	902.6	6799.3	912.2	6616.8	952.1	6709	941.7	6681.7	964.4	6831.2	987	7161.9	995.9	7573	999.7	7996.4	1032.7	8607.5	1161.65	9143.85	1006.6	7923.4	798.026	5417.36	795.164	5319.44	787.632	5307.65
	963.4	7995.7	1054.2	9607.8	1029.5	9279.5	1146.5	9585.6	964.9	7357.7	1503.2	12140.6	1530.12	12254.5	1527.67	11091.1	1807	14004.1	1413	11040	1204.33	9749.47	1144.92	9320.4	1128.4	8978.2	1115	8807.09
	1091.5	9474.2	1062	9265	1079.8	8811.5	1159	9198	931	6476	1392.9	10001.9	1495.4	11409.5	1558.18	12062.3	1727	13150.6	1094.5	7149.5	1116	7468	1152.33	9016.17	1112	8498.33	1242.54	10243.8
	1221	10479	987.8	8524.2	1090	8943.5	1057.8	7927.3	1071	7440.7	1467.3	11404.4	1481.19	10857.1	1403	8762			1320	9495.5	1166.5	9135.33	1222.99	9614.11	1310.54	10325.2	1046.78	7656
	1076.4	10062	1074	8866.9	1028.5	7635.4	1107.1	9815.6	1089	7319	1342.6	9875.1	1480.41	11604	1415.67	10114			1094.5	8442.5	1284.93	10169.4	1105.36	8796.18	1203.36	8948.08	1198	8656.54
	985.6	8049.7	1091.4	9555	1130.5	8932.1	1093.6	7992.2	1260.5	10210.5	1473.7	11794.4	1537.5	11501.1	1423	9678			1620.23	13050.4	1150.1	9123	1119.83	8702	1217.57	9539.9	1305.55	10298.4
	1121.8	10454.2	1208.5	10143.5	1207.5	10404.5	1235	10417	1191	9610	1364.2	11368.9	1477.71	11717.1	1390	9400			1481.92	11775.3	1274.87	10414.3	1164.37	9390.74	1110.4	8669.8	1104.38	8707.41
	1069.6	9265.3	1032.1	7903.3	1080	8003	1418	12249.5	1304.7	11019.8	1405.5	11482.5	1424.87	12421.8	1483.71	11277.2			1662.67	13726.1	1106.2	8730.6	1314.69	10439.5	1193.17	9362.25	1266.55	9610.27
	985	6977	1171.5	10849	964	6807	1106.5	9829	1271.3	10477.3	1404	10223	1437.75	10747	1478.38	10821.3			1285.67	10151.5	1200	9550	1075.2	8295	1274.38	10231	1248.52	9971.81
	1045.3	9300.3	1063.3	8928.3	1170.5	10231.5	1225	10383	1179	8956	1359.5	10121	1430	10766	1439.33	10344.5			1146	7614	1210.14	9555.14	1154.27	8550.09	1261.18	9954.79	1137.83	9412.75
	1046.5	9053.6	1189.5	10816.5	1090.5	9590.5	1141.5	10004	1296.7	10047.3	1326	10069	1366	10462	1383	11200			1444.5	10543.2	1071.67	7040	1181.5	9385	1174.83	8923	1147.25	8823.61
	1096.7	9386	1080	9300	1123.1	9105.1	1461.2	13497	1370.5	11208	1335	11089	1433	11628					1554.88	11956.9	1418	11051.9	1125.75	8560.75	1252.36	10024.5	1184.37	9299.69
	1085	9862.3	1116	9231.9	977.5	6268	1291.9	11227.5	1362	11112.5	1502.3	12107.5	1427	11085					1350.2	10600	1205	9208	1177.17	9414.83	1167.12	8792.5	1268.8	9946.7
	1019	7145	1109.4	8725.6	996	6059	1153	9772	1356.6	11145.2	1348.7	11060.9	1329.67	10953.1					1419.4	10915.9	1212.81	9524.67	1286.8	10156	1124.19	8558.41	1188.57	9092.86
	1053.6	9852.5	1106.8	8621.2	1098.4	8734.2	1289	11473	1160.2	8813.8	1328	12569	1395.62	10918.4					1278.71	10023.6	1095	8476	1173.6	8469	1323.71	10233	1425.9	11857.4
	1195	10092	1141.7	10154	1077.9	7908.9	1384.5	12572	1363	11165	1379	11477	1441.8	11680.6							1270.8	10120.4	1287.45	10045.8	1133.08	8649.25	1039.25	7143.75
	1240.2	12036.8	1099	9231	1115.8	9344.8	1238.7	11528	1271.7	10069.3	1428	11318									1323	10777.9	1288.3	10204.7	1099.5	8935.17	1250.62	10650.8
	1414.5	15381	1163.6	10767.7	1351	11033	1206.8	10484.8	1303.3	10660.7	1436.5	11946.5									1291.2	10418.1	1306.84	10029.2	1243.52	9472.31	1096.5	8138.83
	1400.5	15086	1311	12274.4	1157	10084.6	1185.5	9938.6	1395.7	11794											1175.57	9379.43	1191.75	9048.5	1232.8	9595.87	1383.12	10779.8
	1050.3	8269	1223	12110	1098	9009.5	1117.3	8580.3	1313	10251													1158.33	8970.3	1360.52	10668.7	1281.91	9966.86
	1006.8	8498.6	1099.8	9747.2	1267	9759	1139.8	9377.8	1378.5	11344.5															1405	11130.1	1212.65	9356.08
	1282	12071	1053.1	8727.9	1165.7	10196.9	1252	10036	1250	9434															1220.83	9633.33	1373.4	10959.6
	1006.4	8028.1	1083	9527.2	1147.2	9721.5	1192.4	9283.9	1217.5	9816.2															1191.69	9430.76	1280.07	10315.6
	968.5	7237	1330	12262	1212.5	10406.2	1124.1	9132.9	1275	10502.5															1229.5	9501	1252.27	9810.97
	1011.1	8691.9	1301	11429	1231	10142	1316.4	11317.3	1222.3	8931.3															1218	8525	1206.27	9364.07
	1006.8	8304	1056.6	9252.2	1204	9960.4	1113.7	8718.5	1137.5	10102.5															1333.88	10249.9	1159.6	8896.6
	1014.5	7089	1047.4	8933.4	1138.3	10204.6	1200.4	10054.8	1310	10615															1193.67	9225.28	1184.4	8788.4
	989	7138	1056.7	8783.2	1058.9	8282.2	1040	7296	1356	10437															1146	8919.17	1280.13	10180
	994	7314	1044.2	8760.2	1132	8335	1201.8	10263	1327	11984.7															1360.9	10748.7
	1074.9	9577.4	1035.2	8374.8	1135	9163	1273.3	11165.3	1319	10269
	1042.8	8758.7	1170.6	10001.8	1042	7370.5	1248.5	10418.6	1443.9	13028.4
	1141.4	10302.2	1168.6	10170.7	1135.6	9478.2	1241.5	9811.5	1312	10501
	988	7408	1023.7	7307	1145.6	9159.5	1287	10694	1302	10378.3
	1039.4	8904.5	1127.2	9590.2	1034.3	8485.4	1242	10089.3	1248.5	11070.2
	1041.5	8902.8	990.2	8698.5	1055.2	8231	1173.7	9708.2	1234.7	9705.7
	997	7306	1061.9	9297.5	1329	11919.9	1253	10534.8	1253	10076
	1004	7744			1256.8	10705.1	1159.2	9611.9
	957	7234.8			1215.7	10160.3	1142.7	8798.7
	978	7546			997.1	8064.7	1166	9819
	958.5	7212.3			1046.1	8532.1	1137.3	9485.5
	960	7378					1189.6	9826
	944	7217					1024.7	8541
	977.8	8386.4
	980	7468
	960	6791
average	1056.46	8880.23	1112.4	9592.52	1123.45	9088.8	1198.46	10011.2	1258.34	10095.1	1399.79	11179.3	1445.87	11333.7	1450.19	10475	1767	13577.4	1369.01	10463.2	1209.78	9438.42	1191.13	9284.65	1222.22	9490.12	1217.79	9508.73
Bg corr	153.861	2080.93	200.2	2975.72	171.349	2379.8	256.763	3329.48	293.943	3263.95	412.788	4017.44	449.97	3760.68	450.493	2478.63	734.3	4969.85	207.363	1319.33	203.185	1515.02	393.103	3867.29	427.054	4170.68	430.154	4201.08
ratio	13.5247		14.8637		13.8886		12.9671		11.104		9.73244		8.35762		5.50204		6.76815		6.36239		7.45637		9.83784		9.76616		9.76644
Rel RFP	1		1.30117		1.11366		1.6688		1.91044		2.68286		2.92451		2.92792		4.77248		1.34773		1.32057		2.55492		2.77558		2.79573
Rel GFP	1		1.42999		1.14362		1.59999		1.5685		1.93059		1.80721		1.19112		2.38828		0.634007		0.728048		1.85844		2.00423		2.01884
Rel to G2	1		1.099		1.02691		0.95877		0.821015		0.719603		0.617951		0.406813		0.500427		0.470426		0.551314		0.727396		0.722096		0.722117
Timepoint	3	G2	4	G2	5	G2	6	prophase	7	prometa	8	meta	9	meta	10	meta	11	anaphase	12	late ana	13	telophase	14	G1	15	G1	16	G1
	RFP-RMI1	GFP-TOP3A

## Sheet: Movie 14C
Movie	14C
Timepoint	17	G2	18	G2	19	G2	20	prophase	21	prometa	22	meta	23	meta	24	meta	25	meta	26	meta	27	meta	28	anaphase	29	late ana	30	telophase	31	G1	32	G1	33	G1
	RFP-RMI1	GFP-TOP3A
Background	814.9	6892.93	839.768	7262.4	836.43	7236.06	827.755	7311.42	841.5	7350.2	1060.08	9856.85	1023.72	9756.94	1027.57	9612.86	1077.96	10168.6	1087.96	10399.5	1060.14	9913.61	760.36	5074.67	755.755	4860.15	753.706	4612.88	749.289	4548.37	748.03	4435.18	745.473	4430.53
	942.6	8945.8	1113	11932	1137	11777.8	1029.33	9139	1153.1	10948.1	1294.97	12280.1	1243.52	11981.9	1337.7	12864.4	1376.32	13600.1	1472.98	14796.5	1258.68	11759.1	1298.97	12997.1	1038	9575	1024	8700	1073.07	10614.3	988	7968	955	7478
	1069	9367	1149.27	11317.1	1166.25	11345	1058.46	10213.9	1134.77	10919.3	1253.49	12070.3	1308.31	12559.2	1149.55	10567.5	1384.3	12266.6	1262.04	11820	1099.2	10107.8	1226	10619.7	983.5	10022.2	964	8161	1189	10036	1006	8072	953	7480
	954.5	9907.5	881.2	7204.2	936.333	8488	981.556	8791.44	1013.25	9282	1360.5	13747.9	1057.5	9797.5	1206.83	11141.6	1277.94	12525.6	1445.85	14073.9	1466.17	14768.2	1297.98	12874.1	1080.57	10752.7	941.2	8954.4	1046.82	9758	1089.12	10070.2	978.5	7522.5
	932	8461	1201.33	11418.7	1046.45	9949.73	1186.92	11400	1099	9747	1206	9872			1241.47	12866.1	1165.62	10469	1211.83	12163.2	1280.61	12790.4	1207	10603.6	1179.29	12629.3	1019	8162	1054.33	9850.83	1065.75	9760.75	924	7095
	1019.25	10031.8	1037.67	9528.33	1078.8	10296	963	10395.3	1054	9533.29	1473.73	14982			1205.91	12125.3	1295.3	12833.1	1180.22	11859.7	1177.4	10560.6	1177.5	10297.8	1008.33	10023.7	924	8048	1044	9603.25	976	7814.5	927	7930
	1182.88	11813.4	1053	9730.5	1095	8194	1157.09	11232.3	1034.75	9157	1219.5	10926			1358.1	13477.7			1392.19	13592.9	1095.5	9638.5	1108	9426	1074	9734	942	7622	996	8502	1021.2	8794.4	972	7765
	1000.33	9677.33	1124.5	11285	1193	11082	933	8764	1024.5	8705.38					1238.67	12157.3					1372.24	13355.3	1082.75	9594.5	1123.72	12084.6	1137	11373.1	1003.5	9609	997.9	9862	927	7762
	1228.93	12117.6	1029.2	8835.2	1054.67	10321.4	1086	10557.5	1165	10753											1244.8	12034.2	1172.8	10120.4	1118.83	11812	1045.67	9870.5	1025	9370	983	9158	1068	9689.89
	1107.5	11093	1046.5	9368	1085	10187.5	1019.33	10834.2	1057.83	10166.2											1216.16	11344.6					1003	9232	1035.8	9969.5	1000	8545	1006.67	8917.33
	1032.14	9871.43	1033.27	10245.6	1149.83	11795.4	955.8	8525.8	1177.18	11272.2															940	8508	934	8820	1062.09	10064.1	936	8510	969	7888
	995.615	9179.69	963.833	8706.67	1054.5	8857	1133.5	11429.8	1227.48	12082.9															1185.25	12414.6	1163.78	12496.1	1102.2	11020	1023.67	9218.33	989.778	9462.56
	897.5	7432.75	1180.06	11714.1	1120.55	10630.8	988.714	9644.71	1221.71	12126.1															1088.4	11232.9	1089.62	11098.8			996	8831.5	1023.8	9205.2
	1240.5	12375.9	1043.5	9892.75	971	8265.2	985.091	8938	1065.5	9793															1197	12814.5	1084	10072	1026.88	10399.5	1041.38	9212.5	963.667	8656
	1162.73	11889.8	1162.38	12586.1	1084.12	11082.1	982.167	8619	1181.3	11295															1008.5	10839.5	1017	9499	970	9569	947	8048	995.5	8346.25
	1122	10051	971	10033	989.5	8079.17	1040.5	10119	1023.5	10005.5															981.556	9961	897.333	8809	1040	9145	998	8897	1032	8213
	903.5	7461	1059.5	9225	1021.17	9280.83	1095.94	10606.5																	1082.95	10881.5	1036	10460.4	1014.67	9865.67	1007	9564	965	7538
	1053.75	10324.2	1085.2	10135.8	1091.9	10851.2	1057	9116																	1035.21	10534.2	955.625	8732.75	1029	9658	942	8079	1010	9093.5
	1056.54	10645.8	1128	11286	1006.42	9832.08	982	9185.75																	1100.33	11902	950	8914			1036.83	8946	936	7203
	1015.67	8838.67	1086	10318	984.667	10010.8	1006.25	10777.4																	1110.71	10980	1178	11833.2	1132	10918.7	944	9448.5	1105.83	10165
	1013.38	9865.92	1050	8704	1249.8	12510.2	1018.85	10108.3																	1299	14540	1039.46	10684.3	1034	8976	940	8424	973	8351.5
	1130	10433.5	1164	10722	952.556	9460	1053.4	9532																	1211.67	11919	977	10048.2	1019	8228.5	996	9791.67	951	8572
	1211.4	11492	1174.14	11857.6	1119.33	11093.4	984.333	9301.67																	1081	11231	1003	9408	992	9023	1175	10466	1043.38	9616.5
	1113.67	10954.7	1044.2	9912	993.333	9892.44	978	9288.67																	1205.97	13114	919	8497	1030	10728	970.25	8909.5	992.8	8858.8
	1232.5	11910.5	1073	9708	964.667	10399.7	1015	9892																	1116	9254	978	9322.5	1053.12	9797.12	1004.45	9572.64	1015	8742.25
	1287	13212	1031	10314.8	1029.71	9594.14	1098.33	10481.2																	1071	9159	1128.75	11598.3	1208.12	11103.8	982.5	8497.5	926	7130
	1182.5	12961.2	1124.93	11427.9	901.333	8007.33	1004.57	9154.29																	1160.67	10232.3	1062.67	10811.4	1097.14	10776.6	1025.25	8954.25	1025	8836
	925	8224	898	6889	1001.33	9514	1073.2	10158.6																	975	8771	1035.67	10054	1005.67	9429.33	953	7032	929	7924
	1049.2	10136.6	1159.25	10787.2	948	8666	962.75	9111.25																	1025.4	9710.6	944.5	9168.5	1049.25	10743.5	941	6896	966	7839
	1049	11250	1045.8	9932.6	1025	10151	923.167	8597.33																	1065.67	9169.89	952	8838	1003	9457	934	7766	982.5	8447.5
	1102	10773.6	1082	9710	960.5	9999.5	980	10464.3																	1074.41	11522.8	950	8787.5	1078.5	10031.5	997.667	8177.67	1024.5	8886.5
	1152	12057	988.7	9770.4	1053	10040	974.75	9411.25																	1019	9641	971.5	9368.83	1073.89	10807.9	1010.33	9151.33	1118	10140.8
	912	8247	990	10195	993.2	9758.2	1021	9756.67																			1022.79	10383.4	1010	8727	1042.64	9607.91	1016.67	8884.17
	1004	9150	1017	9802	1102.82	10572.6	914	8358																			1008.94	10016.6	997.429	9847.71	1119.91	9696.82	926.5	7955.5
	1052.17	10400.2	998.25	10327.2	964	8915.25	1039.83	10485.2																			897.429	8044	1020.6	9106.6	934	6948	993	8341
	1001	8867	1144.6	11555.2																							1152	10974.3	1074.33	9707	1094.4	11116.8	954	7369
	896	7334																									957	8698	1033	10648	979.75	9155	986	7981.25
	893.5	7646																									1049	11134.4	1048.8	10533.8	978.333	8403.33	949	6095
	1039	9192.5																									1216	11603.2	974	9725	1116	9618	1051.33	10128.8
	1071	10065.8																									1084.66	10933.8	998	9701	1081.17	10368.5	926	7067
	1077	10147																									920	8393	1030.8	9425.4	954.5	7406	928	7975
	1032.5	9848.5																									951.5	9113	1155.36	11610.9	970.6	8852	1028.67	9078.92
	1174.17	11907.2																									934.333	8860.67	1060.43	9491.29	1076.75	9787.42	941	7439
																											929.5	8201	1127	11221.6	944	7385	997.5	8463
																											1003	10239.8	991.333	8395.33	1001.67	9655	1015.4	8772.8
																											993.385	8844.23	995	8048	986	9010	1094.24	9791.76
																											1012.72	11084.5	1020.5	9057.5	939	8501	952	7429
																											1042.56	9637.56	1013.4	9766.4	952	7527	995.714	8668.43
																											1121.78	11785.6	996	9216.75	945	8155	1008	8779
																											912.25	8026.25	968	8573	943	8929	1053.83	9366.33
																											1009	8235	991.667	9652	948	8757	943	9111
																											996.886	9279.71	977	9157	1059.71	10484	933	8548
																											987.333	8421.33	1047.67	9195	963.667	8166.67	926	6562
																											1016	8623.33	1106.25	10306	954	8579	937	7868
																											1077.38	10535.2	992	8886	1024.16	8994.26	928.5	8819
																											1018.23	10140.5	990	9549	983	7737	1093.14	10254
																											1061	10458	1006	9125.33	997.5	9735.5	975.143	8719
																											1035.38	9535	1035.38	9535	966	8513	954.5	8200.5
																											990.833	9290.5	990.833	9290.5	1058.54	9730	968	9278
																											915	8136	915	8136	994.5	9392.5	932	8136
																											967.25	9297.75	967.25	9297.75	960.25	8912.5	971	7823
																											970	8586	970	8586	965.75	9081.75	1005	8868.5
																											1033	8757	1033	8757	948.5	7609	959	6894
																											929	8759.5	929	8759.5	939	8738	935	7051
																															1101.5	10316.5	964	8387
																															1013	9958.5	958.125	8798.62
																																	923	8616
																																	1072	9565.5
																																	1028	9152
																																	929	7949
																																	937	7792.5
																																	1005.17	9831
																																	972	8656
average	1059.93	10132.4	1066.67	10182.2	1044.85	9967.64	1020.08	9776.18	1108.86	10385.7	1301.37	12313	1203.11	11446.2	1248.32	12171.4	1299.9	12338.9	1327.52	13051	1245.64	11817.6	1196.38	10816.6	1088.03	10832.2	1007.65	9547.19	1032.02	9640.81	997.909	8881	982.13	8405.83
Bg corr	245.027	3239.47	226.897	2919.8	208.415	2731.58	192.329	2464.76	267.358	3035.53	241.288	2456.19	179.393	1689.26	220.746	2558.55	221.933	2170.33	239.558	2651.54	185.5	1904.01	436.017	5741.97	332.277	5972.07	253.943	4934.32	282.729	5092.44	249.879	4445.82	236.657	3975.3
ratio	13.2209		12.8684		13.1065		12.8153		11.3538		10.1795		9.41656		11.5905		9.77922		11.0685		10.2642		13.1692		17.9732		19.4308		18.0117		17.7919		16.7978
Rel RFP	1		0.926008		0.850581		0.78493		1.09114		0.984741		0.732134		0.900904		0.905747		0.977678		0.75706		1.77946		1.35608		1.03639		1.15387		1.0198		0.965839
Rel GFP	1		0.901322		0.84322		0.760855		0.937046		0.75821		0.521463		0.789808		0.669965		0.818512		0.587755		1.77251		1.84353		1.52319		1.572		1.37239		1.22715
Rel to G2	1		0.973341		0.991347		0.969328		0.858778		0.769958		0.712251		0.876683		0.739682		0.8372		0.776364		0.99609		1.35946		1.46971		1.36237		1.34574		1.27055
Timepoint	17	G2	18	G2	19	G2	20	prophase	21	prometa	22	meta	23	meta	24	meta	25	meta	26	meta	27	meta	28	anaphase	29	late ana	30	telophase	31	G1	32	G1	33	G1
	RFP-RMI1	GFP-TOP3A

## Sheet: Movie 7A 
Movie 7A
Timepoint	4	G2	5	G2	6	G2	7	prophase	8	prometa	9	meta	10	meta	11	meta	12	anaphase	13	late ana	14	telophase	15	G1	16	G1	17	G1
	RFP-RMI1	GFP-TOP3A
Background	790.733	5295.87	796.205	5408.51	804.076	5507.57	806.782	5705.37	817.437	6020.26	955.579	7461.68	1017.5	8360.55	1071.57	8493.21	904.6	7202.9	774.541	5362.29	888.173	6996.64	808.777	5836.05	791.812	5580.37	777.41	5246.73
	891.636	7064.75	883.49	6838.63	970	8540.6	820.25	5914	1124.74	10650.5	1112.67	10758.7	1199.81	10885	1281.17	11382	1253.5	10501.9	1301.26	11698.6	909	8053	929.692	8202.77	791.4	5972.4	820.75	6428.75
	815.429	5912.5	832.1	6101.6	819.4	6065.6	954.5	8262.5	1058.4	9749.4	1219.15	11103.7	1144.98	10697.1	1232.47	10987.8			1258.31	10936.9	1096.73	10110.8	853.5	7985	842.167	6917.08	823.231	6393.62
	816.6	5996	799	5672	992.167	8370.83	912.25	7018.75	1075.15	9268.38	1121.8	10497.6	1180.25	10598.2					1224.29	10531.6	1110.47	10162.2	873.4	7288.6	833.588	6389.82	890.639	7407.92
	847.4	5956.6	904.3	7797.5	881.125	7409.5	871.8	6823.2	944.25	7867.25	949	7701.6							1209.93	10472.9	1036.2	9550.4	1032	7929.5	841.833	6672.33	849.5	7068.5
	890.25	8133.62	954.455	7817.5	960.176	8003.76	940.6	8488.6	1018.83	8099.17	1119.4	9810.4							1161.64	10382.5	1129.65	9938.7	955.571	8827.43	912.556	7846.11	829	6597.5
	911.893	7347.68	950	6938	915.267	7749.47	863.333	6288.83	970.7	8542.05	1098.35	9468.71									1101.84	9353.91	930.1	8166.4	903.111	8299.22	808.8	5856
	1047.33	9057.58	1048.54	9144.85	901.5	6917	987.629	8438.23	1004	8567	1128.5	9454.5									968.739	8318.91	914	7856.5	837.3	6654.5	859.667	7057.17
	899.471	7504.47	955	8448.7	908.474	7739	890.5	6894.5	905.526	7442.47	1176.56	10620.5									886	7863	850.75	7025.5	895.5	7648.33	902.6	7335.7
	962.143	8594.86	978	7091	1005.62	8408.54	931.083	8019.17	911.833	7035	1156.29	10619									1067.14	8989.43	926.182	7944.82	923	7760	914.318	8116.91
	946.5	8163	927.143	7734	934	8503	969	8200.33	959.125	8701.75	1077.5	9660									1076.63	9736.05	988.629	8520.53	936.545	7293.73	855.357	6586.5
	991	8356	908.476	7705.43	994	8675.83	1070.35	9290.18	883.4	7433.6											1064.42	9196.22	992.1	8045.9	949.2	8342.52	959.5	7828.83
	1030.27	9194.27	1006.39	8874	1019.86	9146.05	891.25	6661.75	998.6	8577.2											986.833	7609.17	992.857	9440.29	860.333	6714	956.955	8172.82
	1005	9459.43	938.4	8372.1	977.308	9023	907.2	8046	952.75	8518.5											894.25	7667.88	1075.54	9548.43	986.263	8561.16	897.667	7176.33
	1064.33	10064.8	940	8111.33	1069.71	9374.86	907.5	8106.5	1127	8907											1034	8579	1037	8963	931.231	7508.69	949.182	7653.73
	941.2	8845.1	971.897	8582.03	962.2	9046.2	999	8480.25	1043.5	8612.33											914.25	8024.5	1024.09	8823.7	938.5	7990.5	919.2	7520
	1099.9	10021.1	943	7341	1048.5	9395.12	996	8556.75	1029.83	8788.83											1022.38	8803	921.5	8276.5	945.714	8712.86	870.667	7203
	NaN	NaN	903.7	7164.1	943.5	8641.1	923.739	7890.3	1019.14	8860											1029.32	8917.56			1087.67	9663.17	888.737	7607.16
	920	7606	877.75	6980.94	1059.44	9562.22	925.375	8038	876	8171													959.667	8381	885	7507	989.091	8431.55
	876.667	6953.75	900.125	7652.62	NaN	NaN	984.75	7943.5	1056.47	9413.24													924	8256.5	1073	9431.67	976.182	8480.73
	898.667	7663.33	964.143	7738.43	975.45	8022.6	1094.33	10610.7	1058.14	9023.71													804.333	6524.33	865	7096.5	868	7274
	949.5	7783.33	960.444	7928.07	919	7544.17	1108.19	10329.8	1016.36	8663.21													907.25	7230.45	979	9432	871	6893
	879.15	6913.6	1012.31	9463.69	994.359	8894.64	1224.83	11778.2															818	6633.8	1001.44	9094	897	7814.25
	881.857	6646.14	840.13	6685.09	938.4	7632.65	897.273	7320.82															866.6	6902.4	886.091	7365.73	972.5	8420
	1025	8811.18	845.8	6307.2	868.889	6621.44	920.714	7395.14															908.667	8023.83	1074.6	8946.8	935.1	7750.12
	817.704	6482.04	1038.5	9339	875.042	7301.67	924.333	7490.33															912	7367.33	1012	8291	856.75	6869.5
	851	7372.67	980	8532	871	7925.67	986.857	7755															802.833	5965.83	881.333	7597.33	869.167	6803
	1021.27	9687.91	843.067	6637.4	853.448	6561.14	955.636	8341.95															876.5	8103	919	7465	866	7207.25
	975.143	9046.43	948.6	7962.2	839.467	6824.13	949	7585.25															998.263	8943.16	957.5	7127.5	815.222	6444.56
	964	7797	840.846	6618.54	808.778	6045.89	983.348	7996.43															843.733	6596.67			832.447	6350.79
	814.75	6087.58	827.5	6259.17			851.5	7197.38															926.5	7433.17	860.5	7693	782.923	5986.46
	825.333	6284.67	805.667	6204			902.031	7348.22															1002	8589	857.756	6650.02	845.733	7153.2
	834.571	6933.86					879.429	7506.29															875	7023.83	792.6	6291.2	837.429	6150.86
	837.5	6838.88					927.037	8044.04															994.5	8583.86	781.333	5846	840.083	6261.25
	861.8	6882.4					895.795	7213.41															933	8029	865.316	7223.63	973.714	8596.57
	813.625	6337.06					918.2	7425.2															977	8714.22	854.111	6759.67	943.556	8726.89
	895.625	6992.56					846.5	6523															815.429	6016.43	834	6523.25	851.5	6727
	826.875	6204.12					826.636	6608.18															1044	8542.12	779.857	5852.14	814.105	6213.84
	822.2	6406																					878.556	6984.96	1014.5	9530	1006.5	8043
																							988.778	8417.44	1091.83	9301.83	901.4	7343.6
																							833.5	7134.5	794.625	5898	946	8001.5
																							861	7271.75	834	7352	874.5	8145
																							946.667	7756.67	953.857	7852.48	929	8423.5
																							942	7430	839.2	6856.6	820.889	6130.22
																							942.116	7761.63	881.5	6977.25	982.857	8061.86
																							961.667	7851.56	973.429	8731.71	808.143	5825.14
																							827.889	6692.78	1031.71	8380.43	848.571	6804
																									854.24	6860.76	976.714	7801.14
																									805.2	6029	809.143	6150
																									978.45	7945.4	833.333	6583.78
																									860.5	7289.5	885	7984.5
																									860.333	6720.17	820.5	6516.5
																									944	7835.29	857.2	6233.4
																									1019.5	8400.25	832.125	6316
																									881	7865.5	834.25	6391.5
																									947.519	7858.74	914.969	7325.75
																									852	7206.4	919.75	7350.75
																									823.6	6425.6	916.088	7332.97
																									834.2	6542.6	792.333	5612.83
																											805	6511.67
																											813.714	5988.71
																											846.5	6934.5
average	912.232	7605.47	920.283	7549.75	939.503	7998.06	941.561	7887.31	1001.61	8613.89	1115.92	9969.46	1175.01	10726.8	1256.82	11184.9	1253.5	10501.9	1231.09	10804.5	1019.29	8874.92	925.963	7822.36	906.15	7526.3	878.816	7120.94
Bg corr	121.499	2309.59	124.078	2141.24	135.427	2490.49	134.779	2181.94	184.171	2593.62	160.343	2507.78	157.513	2366.22	185.25	2691.72	348.9	3299	456.545	5442.21	131.113	1878.29	117.186	1986.3	114.338	1945.93	101.406	1874.21
ratio	19.0092		17.2572		18.3899		16.1891		14.0827		15.6401		15.0224		14.5302		9.45543		11.9204		14.3257		16.95		17.0192		18.4823
Rel RFP	1		1.02122		1.11463		1.1093		1.51582		1.31971		1.29641		1.5247		2.87163		3.75761		1.07913		0.964504		0.941059		0.834621
Rel GFP	1		0.927105		1.07832		0.944731		1.12298		1.08581		1.02452		1.16545		1.42839		2.35635		0.813255		0.860023		0.842545		0.811489
Rel to G2	1		0.907837		0.967424		0.851648		0.740837		0.822765		0.790271		0.764379		0.497415		0.627088		0.753623		0.891674		0.895315		0.972284
Timepoint	4	G2	5	G2	6	G2	7	prophase	8	prometa	9	meta	10	meta	11	meta	12	anaphase	13	late ana	14	telophase	15	G1	16	G1	17	G1

## Sheet: Movie 7B
Movie 7B
Timepoint	2	G2	3	G2	4	G2	5	prophase	6	prometa	7	meta	8	meta	9	meta		anaphase	10	late ana	11	telophase	12	G1	13	G1	14	G1
	RFP-RMI1	GFP-TOP3A
Background	888.96	7335.24	898.512	7482.64	923.346	8042.14	947.605	8625.38	943.942	8383.38	1089.21	10029.8	1166.82	11231.5	1235.78	12643.9			861.139	6761.95	794.714	5687.89	799.015	5556.14	888.6	6829.3	780.543	5082.49
	1131.93	11501	907.5	7179.5	984.444	8918.11	1021.55	9460.27	1263.6	13076.7	1358.72	14384	1461.22	14944.8	1642.01	16513.4			1833	18897	1261	12600.3	1168.33	9746.5	1380	13313	1296.25	10561
	1095.17	10197.5	970.909	8776.73	1119.97	11804.9	1255.4	12238.4	1115	9706.8	1414.73	14388.2	1507.08	15884.4	1697.87	17282.8			1737.74	17810.3	1747.89	17691.5	1185.5	10431	1389.7	12891.9	1288.5	10264.5
			1274.07	13796	1231	12123.4	1359.5	15076.3	1301.5	13164	1520.3	17129.8	1565.74	16644.7					1762.44	17839	1766.18	17743	1433	14169	1343	11583	1405.29	13106.8
	1137.45	11525.8	1104.75	10384.1	1293.5	14087.1	1090.25	9499.25	1299	12710	1249.69	12177.4							1618.12	16291.4	1553.22	15096.1	1410	13327	1421.62	12729.1	1362.36	12595.7
	936	7876	1142.29	11103.3	1275.41	14060.6	1175.86	12823.8	1111.2	10186	1265.67	10936							1672.42	17115.6	1712	15874.5	1261.33	11372	1434.8	12881.6	1432.7	13557.9
	951.667	10059.7	980.5	9230.75	1210.8	12487.6	1218.25	12336.9	1335.5	13507.8	1446.45	13937.2									1636	15742	1487.6	13750.2	1310.75	12593.8	1459	13074.3
	1041.33	10584.7	1089.4	10311	1333.69	14947.2	1351.33	15157.3	1287.71	12883.4	1446.33	14296.3									1193	10693.5	1510.03	14321.1	1350.7	12213.3	1275.38	10905.5
	1089	10880.7	1147.14	11994.4	1086.17	10028.5	1220	12625.3	1278.5	12441.4											1361.03	13367	1372.93	12570.3			1211.6	11516.6
	1129.21	12274.4	1166	11209.5	1073.61	10287.5	1442.56	15802.2	1052	9369											1379.39	13594.2	1449.22	13823.4	1241	10489	1390.25	12585.5
	1046	8685	1228.66	13251.6	1018	8377	1303.78	13645.3	1282.27	12090.1											1258	10811	1419.32	13940.3	1295.5	11289.5	1329.95	12261.8
	1046.6	10437.5	1147.77	11642.5	1025	8663.2	1220.25	12223.8	1124.14	9978.86											1251	11501.8	1458.25	13499.8	1346	11080	1456.74	13676.1
	1089.33	10106.7	1096.32	10745.7	1169.5	12339.5	1328.6	13755.6	1304.33	12557											1263	11954.3	1466.5	13222.2	1388	10456	1407	12238
	1145.62	11346.3	1070.33	9559.83	1014	8820	1314.6	14399.3	1290	10469											1180.5	11391.5	1416	12428	1351	10689	1360.2	11093.8
	1138.31	11762.8	1123.14	11141.4	1016	10998.5	1230	10688	1368.5	13758.8											1134.2	10077	1346.4	11594.4	1247.22	10296.5	1367.5	12016.5
	1078.11	10963.7	1228.2	13010.6	1055	8979	1407	16340.7	1118	10348.8											1284	10754	1298	11463	1265.44	10164.4	1322	10407
	1151.56	12208.5	1056.5	9563.17	1222.5	12654.4	1287.45	14026.3	1185.42	11403.6											1241	11324.7	1499	12232	1208.42	11222.8	1348.73	12082.2
	1051	9208	1043	8973	1060.57	10171.9	1474.17	17651.5	1402.4	15901.7													1352.25	11230	1222.83	11087.8	1114	9055
	1182.43	13172.9	1041	10110	1063	8905	1149	11113.3	1175.2	11125.4													1440	12273.3	954	7655	1205.57	10197.1
	1078	8981	1004.4	8324.8	1343.9	14280.7	1134	9809	1302.8	13894.8													1267	10904.4	1132.13	9742.73	1140	8509
	1363.13	16587	1049	8563	1095.43	10840	1133	11057	1124.71	9638													1335.38	11579.1	1085.57	9738.57	1230.49	10277.6
	1030	9754	1159.83	10877.3	1307	14709	1180.33	11508.1	1135.1	9737.7													1120.82	9752.47	1204.73	10688.6	1045	7406
	1115.2	11849.9	1192.25	12265	1204.06	12336	1320.23	13259.8	1151.29	10445.1													1160	11758.7	1067	8672	1056.92	9150.15
	1063.62	10679.2	1221	12536	959.75	8362.25	1178	12029	NaN	NaN													1016.25	8801.25	1230.5	11562.1	1077.05	9654.47
	1078	9167	1151.25	13555	1054	8537	1114.33	10917	1004.25	8814.69													1223.83	11451	1075	10404	1193.67	10653
	1060	13098	1093.93	11756.9	1171.75	11620.6	1285.2	14234.5	1088	9673													1218.67	10004.3	1100	9525.17	1070.12	8917.25
	1089.33	10692	997	9693.88	1372.25	14355.2	1108.83	9537.17	1072.4	9255.4													1312.06	12206	1099.27	9910.09	1103	8624
	1338.17	15506.8	1037	8079	1213.44	12135.4	1282	11422.5	1045.78	9345													1246.33	10869	1269.87	11902.7	1148.58	10423.3
	1213.33	13365.8	1154.73	12041.8	1240.3	12858.6	1139	11277.7	1081.5	10123													1105.5	9787.7	1309.17	11652	1187.81	10772.3
	935.778	8077.33	1195.92	12526.8	1098	8500	1155	10292	1098.38	9718.38													1132.74	10292.4	1299.41	11692	1097.5	8996.5
	1143.6	11382.6	987.455	10182.8	1418.58	16903.6	1193.43	11243.9	1095.78	9874.56													1158.36	10670.2	1231.44	11107	1175	9161
	941	7908.8	1076	10464.5	1115.22	11048.1	1314.31	14203.3	1104.5	9724													1229	11382	1218	10310	1138.77	9833.23
	1200	13374.4	988.211	8529.42	1105.29	10363.9	1249.53	12867.2	1103.76	10179.2													1260.51	11897.1	1066	8705	1171	9780
	1085.9	11076.8	1270	12744	1037.12	9243.12	1244.27	13118.5	1115	9744.17													1317.28	12238	1216.33	11491.3	1183.5	11081
	942	7614.75	976	7676	1243.2	11481.8	1277.45	12421.3															1298.4	12220.2	1192	10678.5	1108.75	9196.5
	931.2	7130	967	7642	1318.9	15026.2	1102.12	10551.6															1264.5	11496.5	1149.11	10541.9	1237	9187
	1054.81	9576.31	1374.07	15085.5	1078.79	10643.4	1110.86	10287.3															1210.4	10763	1221.25	11417.5	1037	9567
	932	7739	903	7467	1121.1	11518.8	1262.67	13020															1216.59	11112.8	1236.56	11256.8	1043	7926
	1025.33	11324.5	958.538	9011.31	1037.33	8553	1159.29	11318.5															1253.48	11630.4	1146.25	9478.25	1234.67	11287.1
	933	6802	1011	9475.67	1001	8192	1037	9470															1258.89	11706.6	1128.67	10337	1148.33	10298
	911.5	7395	1280.24	14725	1043	7997	1161.25	10749.2															1249	10555	1111.75	9457.62	1176.75	10535.3
	1020.35	9258.65	914.5	7243.5	1033	10173.5	987.5	8508															1091.71	9448.71			1118	9343
	980.6	8924	1088	9288	1020	8374	1085	9283.4																			1173	9385
	955	7166.5	1232.67	13699.1	1111.05	10645																	1120	11199.5			1281.17	11425.8
	982.278	9435.11	1313.14	13326.3	1007	7794																					1085.45	9375.82
	1027.89	9651.44	957.667	8685.44	1052.64	10093.1																					1222.08	11418.6
	987.125	8748.75	945	7575	969	7468																					1210	10371
	979.182	9011	958	7454	1021.4	9076																					1259.14	11656.6
	910.5	7006.5	974	8368.5																							1121.62	9946.59
	919	7416	941	8326.33																							1231.67	10532.8
	902.8	7013.8																									1204.33	10371.7
			938	7469																							1166	10416
			981.467	8659.8																							1089	9309
			1027.42	9630.33
			993.5	8089
			927	6897
			931.25	7127.75
average	1052.46	10112.3	1072.51	10128.1	1128.63	10889	1215.81	12172.6	1181.8	11088.9	1385.99	13892.7	1511.35	15824.6	1669.94	16898.1			1724.75	17590.7	1388.84	13138.5	1286.68	11645.7	1229.23	10843.8	1215.35	10499.7
Bg corr	163.496	2777.11	173.995	2645.44	205.286	2846.85	268.208	3547.23	237.856	2705.55	296.776	3862.86	344.525	4593.15	434.163	4254.26			863.606	10828.7	594.125	7450.64	487.661	6089.57	340.631	4014.46	434.811	5417.18
ratio	16.9858		15.2041		13.8678		13.2257		11.3747		13.0161		13.3319		9.79876				12.5389		12.5405		12.4873		11.7854		12.4587
Rel RFP	1		1.06422		1.2556		1.64046		1.45481		1.81519		2.10724		2.6555				5.28213		3.63388		2.98271		2.08342		2.65946
Rel GFP	1		0.952589		1.02511		1.27731		0.974231		1.39097		1.65393		1.5319				3.89927		2.68288		2.19277		1.44555		1.95066
Rel to G2	1		0.895108		0.816431		0.778629		0.669661		0.766292		0.784882		0.576879				0.7382		0.738294		0.735161		0.693836		0.733478
	2	G2	3	G2	4	G2	5	prophase	6	prometa	7	meta	8	meta	9	meta		anaphase	10	late ana	11	telophase	12	G1	13	G1	14	G1
	RFP-RMI1	GFP-TOP3A
