# Supplementary material for: Centromere protection requires strict mitotic inactivation of the Bloom syndrome helicase complex
Source: Research Square preprint supplement (doi:10.21203/rs.3.rs-4420374/v1), 2024-05-30
Supplement: Supplementary file 16 [file Fig 3C. HeLa CENPBmCRMI1 BLM intensity_mitotic phases.xlsx]

## Sheet: 20230309_RIF1-mCherry-BLM
	image 16 metaphase			image 16 anaphase			image 2 metaphase			image 2 anaphase			image 5 interphase			image 5 prometa			image 5 metaphase			image 5 metaphase			image 6 interphase			image 6 metaphase			image 6 anaphase			image 7 interphase			image 7 anaphase			image 7 metaphase			image 8 interphase			image 8 anaphase			image 8 prometaphase
	mCherry	BLM	RIF1	mCherry	BLM	RIF1	mCherry	BLM	RIF1	mCherry	BLM	RIF1	mCherry	BLM	RIF1	mCherry	BLM	RIF1	mCherry	BLM	RIF1	mCherry	BLM	RIF1	mCherry	BLM	RIF1	mCherry	BLM	RIF1	mCherry	BLM	RIF1	mCherry	BLM	RIF1	mCherry	BLM	RIF1	mCherry	BLM	RIF1	mCherry	BLM	RIF1	mCherry	BLM	RIF1	mCherry
background	2077.4	5490.4	22151.2	666.8	3626.5	21837.8	540.821	3488.75	13520.7	305.347	2214.59	13490.6	3960.25	2799.59	15342.4	1325	3366.9	27859.2	2622.4	4246.7	21334.4	1024.8	4396.3	18857.1	699	3079.9	15226.2	1022.2	4463.4	22923.2	665.3	9721	26841.3	1663.85	2031.5	12642.3	1244.06	4976.34	22080.1	714.993	4320.99	19126.7	355.251	3466.62	15424.7	338.34	1234.76	7906.48	1139.42
	2709.2	5624.6	22614.6	730	4257.2	23440.2	1153.14	4340.15	13550.6	1017.11	5118.07	16357.1	7120.71	5765.65	22178.9	1568.3	3153.7	22129.1	3640.2	4768.5	22072.9	1563.3	5730.1	18653.8	951.8	3474.9	19676.2	1237.7	4903.1	24235	1555	14514.8	27963.2	4068.09	4656.35	22276.5	1950.63	7065.89	18869.4	1017.65	4419.81	20554.5	717.861	8064.71	23659.6	1553.77	2759.93	18077.1	1888.14
	2131.4	6089.1	25761.3	730	3576	21481	922.26	3730.12	12925.4	1096.2	4910.28	15046.3	6377.37	5058.62	18977.3	2172.7	3977.2	26119.9	3042.3	4443.3	22146	1595.8	6157.1	18341.2	981.3	3386	18887.8	1772.5	4200	19727.3	978.3	8926.8	19415.2	3054.88	3451.83	20508	1523	5684.27	17409.2	1306.48	5048.04	16338.1	854.577	10880	28755.4	1626.29	3259.12	19638.2	2142.69
	2412.4	5821.4	21384.5	705	4001	22598	933.857	4094.38	13253.9	1182.67	4357.5	12710	7975.4	7207.91	21844.4	1533.1	3194.9	22335.1	3342	4474.5	21473.9	2555	6545.1	16407.4	1199.3	4007.5	21067.4	1536.1	4407.1	21230.1	1302.4	12991.6	28052.3	2922.31	3365.7	20347.5	1524.9	5539.87	22077.1	1187.23	4529.05	17986.9	1145.41	12680.5	30301.3	2032.9	3335.82	25906.9	2162.14
	3147.6	6135.3	22135	1089.3	4683.8	25924.5	1084.19	4507.98	15315.2	1797.54	6020.34	14063	6496.49	5577.18	19459.9	1994.9	3877.2	28301.4	4061.7	5278.8	21129.6	1563.1	5823.7	21145.7	1831.6	6233.2	26262.5	1758.9	5170.4	24527.1	1522.7	14144	26506.6	2675.37	3391.03	19102.2	1463	5350	16816	1114.57	4834.94	21307.4	724.648	7669.96	23331.7	1424.11	2460.74	16121.2	2044.93
	3220.2	6711.6	22561.8	736.8	3328.6	20717.8	971.675	4087.44	13753.3	1237.61	5692.84	16231	6707.12	6077.98	18553.7	2031.8	3725.9	23743.1	4071.5	5177.3	21398.9	2462.8	6525.5	18247.8	1004.1	3988.6	20072.2	1436.8	4885.8	24309.9	1119.7	12423	29452.7	3756.86	4368.57	21182.7	2170.93	8646.13	23288.2	2164.47	7202.19	21883.3	655	6741	20007.3	1439.48	2865.16	18579.6	2100.3
	4133.2	6954.2	23315.3	995	4554	24991	1350.91	5221.75	16219.1	1081.95	5413.71	17245.8	6378.08	4624.75	18617.2	1215.2	3261.6	26747.2	4276.4	4737.1	19836.9	1679.4	5420.8	16252.9	1486.7	4083.1	22580.6	1578.2	5055.2	25871.3	977.1	11282.9	29402.6	2327	2710	15661	1824.48	7371.14	22001.4	1035	5149.53	23787.6	707.789	7609.14	18854.9	1569.88	2628.93	16862.5	1652.64
	3139.9	5675.7	22078.4	879	4290	22729.4	859.168	3640.18	12601.2	1018.53	4501.11	12929.7	6270.11	4905.6	20858.3	1353	3072.3	22937.6	3751.1	4484.1	20989.1	1416.9	5454.7	24415.2	1548.3	4723	22394.7	2076.5	5344.8	23599.1	1448.4	13201.6	28794.1	2984.93	3696.76	18866.8	1520	4786	22723	1539.5	5525.74	19523.8	664.9	6763.46	21388.9	1356.11	2553.13	17132.8	2302.97
	2847	6206	23438	607.9	3028.4	18782.6	937.11	3658.49	12704.3	1014.77	4963.72	13505.9	8192.4	7165.64	24493.9	2050.5	3752	26940.6	4203.4	4601.7	19813.1	2508.9	6199.4	20654.9	1710.8	5561.9	26974.2	1318.2	3225	16607.9	843.9	10875.7	25106.8	3182.74	3633.74	19831.3	1814.63	7211.05	24861.2	1240.23	5229.32	21708.4	1144.06	11940.6	31666.2	1353.84	2735.47	16092.9	1739.8
	2882.5	6248.4	23905.6	817	3747	22701.5	751.912	4265.03	15250.4	1260.41	5417.74	13744.3	6362.98	5581.14	20828.9	1708.9	3472.3	24535.1	4043.7	4536.8	20163.4	2498.8	6003.6	17423.2	1051.5	3710.5	21789.8	1993	5528.7	25916.3	1568.4	14909.9	28057.7	2569	2973	16350	2366.73	8503.25	20439.6	1124	5567	21873	765.762	7256.89	24816.5	1052.43	2266.28	14954.7	1991.95
	2482.9	6645.8	23960.9	932.7	4037.4	24840.7	825.485	3782.72	14951.4	1219.56	5451.85	14045.2	6375.14	5053.22	19886.4	2169.8	3683.9	29874.7	3386	4192.3	18852.2	1645.1	5661.6	22717.7	1882.5	5876.9	27236.7	1489	4725.5	24138.8	887	9859.9	24596.2	2704.9	3503.27	18473.3	2280.28	7698.69	21074.9	1703	6843	21744	681.811	5992.36	21360.4	1375.31	2615.94	19067.5	1766.11
	2800.5	6567	24387	646	3124	20363	759.306	4055.22	15049.6	982	3776	14269	7728.94	6526.33	19189	2443.3	3945.8	29194.8	3646.5	4676	19519	2539.1	6452.2	22823.4	1263.2	4364.5	16649.4	1379.9	3278.4	18137.3	1095	8842	22877	3548.8	4835.12	21457.3	2368.85	7767.49	18765.2	1519.1	5728.69	18289.8	644.91	5763	20475.4	1551.69	2826.25	18839.9	1870.65
	3380.7	6905.8	24095.9	1027.8	4224.8	23578.6	838.519	4250.53	16193.5	1006	4153	14938	6041.95	4592.03	20568.5	1788.2	3641.3	24370.8	3500.4	4782.5	19197.9	1772.8	5432	18759.4	1268	4299	18548	1449	3778	19337	939.4	11465.9	25148	4064.89	4985.67	24072.1	2063.69	7510	22530.8	1737	6438	20361	704.845	8842.88	24556.7	987.095	1980.89	13685.5	1638.58
	3344.3	6396.8	23338.1	903.1	4573.1	23327.5	1152.28	4202.4	13262.9	981	4094	14465	7801.54	7532.4	19652.8	2081.7	3878.7	29253.9	4961.3	5508.8	19142.1	1978.3	6778.9	25993.8	1614.6	5007.3	19040.1	1623.8	4797	23554.3	1128.3	10947.3	24091.7	3408.45	4604.81	16845	1994.29	7067.94	22134.2	1195	4222	18559	1164.62	13756.3	30904.8	1975.81	3650.05	24177.8	1703.66
	2629.9	5734.2	23257	662.5	3315	19585.5	1033.07	4843.89	16083.7	1147.17	5385.91	12285.9	5350.88	4032.28	17463.1	2201.9	3542.5	24835.9	3060.9	3756	16461.9	2894.1	6753.2	21981.3	1221.3	4424.7	18898	1499	3839	19512	1008.5	11303.1	25448.2	3080.48	3958.73	21593.7	1817	9191	19858	1093.28	4613.6	21395.7	633.67	6160.61	24314.9	1865.52	2914.69	20705.8	2355.56
	3025.1	6827.1	25826.5	611.2	3287.4	16417.2	870.935	3690.29	12433.8	1054.91	5429.65	16296.1	8596.36	8061.51	21466.2	1947.5	3486.7	27997.5	4693	5185.2	20036.4	1419.8	5589	22913.7	1251.1	4453.2	25384.7	1304.8	4348.2	20962.6	1180	12132.7	25270.6	3135.48	3621.91	19670.5	1921.08	7789.2	22382.7	1044	4487	21612	641.038	7314.09	22841.1	1022.65	2088.99	15032.6	1590.75
	4929.1	7504.3	23589.3	1048.5	3979	23369.6	698.093	3499.86	12329.8	939	3978	13498	5889.37	4950.32	18196.6	1756.3	3599.6	26001	3030	3233.7	15542.1	1526.7	5868.3	23528.7	1454.8	4749.4	19045.9	1782.1	4761.4	24548.8	926.2	10551.8	25412.1	4615.06	5937.02	24063.5	2544.83	9511.04	21489.4	1298.79	4640.68	19502.9	684.046	6155.31	22589.2	1500.36	2423.38	17530.4	1691.28
	3234.2	6416.2	24669	994	4506	24586.5	717.027	3994.03	13244.2	930.762	4603.45	12606.6	5497.41	4553.48	18670.5	1916	3515.8	26620.1	5435.9	5256.9	18708.6	1681.7	5591.7	25013.7	1231	4366	19577	2053.9	5500.4	23928.7	925	9702.3	24323.8	4286.94	5102.7	23121.8	2651.05	8998.14	22575.3	1204.5	4859.5	19416.5	875.474	8986.02	28141.5	1071.48	2440.5	15390.8	1624.73
	4724.3	7474.7	25336.7	1025	4556	24482	757.297	3909.76	14632.6	853	4860	12351	5149.59	3750.56	16862.5	1920.6	3132.2	22169.3	4696.7	4850.9	19839.7	2681.8	6441.4	19590.1	1207.3	4688.9	24491.5	1315.1	4382	22036.5	1514.9	15210.1	29896.2	3159.8	3901.39	20487	2260.88	9073.22	21540.9	1023.28	4533.88	18298.2	622.387	6068.36	21551.3	1679.27	3023.1	19975.2	1899.04
	3779	6626.4	21539.5	1002	4697	25867	679.886	2975.89	10657.7	1257.7	5166.97	14354.6	5114.79	5081.75	17508.7	1682.7	2753.8	22325	3866.9	4719.1	19859.2	2079	6146.3	21399	1678	5577.6	20341.3	1504.3	4112.1	21622.8	1101.6	11161.4	28299.8	3106.1	3797.08	22308.2	2584.27	9316.59	23241.5	1331	4567	18894	658.855	6717.35	22479.2	1286	2519.2	16770.9	1770.07
	2501.5	6547.2	26546.7	1000	4527.5	25045	701.759	3571.17	13219.2	850	3992	13118	5610.31	4351.6	18997.5	1755.1	3271.7	25227	4835	5205.7	21023.2	1457.5	5520	24429.4	1356.4	4325.1	21428.1	1789.7	5146.6	26076.7	1057.4	12766.5	27576.3	3099.8	4075.03	20515.7	2082.5	8019.67	21620	1163	4794	20847	992.189	11068	30045.5	1198.57	2388.57	15033.8	1722.21
	1909.1	5158.1	20027.7	979	4550	24312				931.25	4435.75	13917.9	6281.33	5457.55	18654.7	1846.6	3540.9	29806	4684.4	5214.1	19266.6	2675.4	6657.4	19540.7	1206.2	4131.6	22962.4	1699.5	4329.6	22519	1441.7	13741.5	29109.8	3588.6	5199.8	24409.6	1958.6	6957.87	24472.1	1355	5117	18368	1106.13	14092.9	29802.7	1276.29	2492.88	17854.3	1658.74
	3077.5	7134.3	24756	978	4288	24449				936.489	4638.31	21703.3	6032.15	4079.69	19801.7	2259.5	3319.7	26306.2	4187.8	4429.3	16824	1434.5	4652.9	16504.8	1458.9	4625.3	30635.3	1197.4	4353.1	21192.4	1054.3	10778.5	24047.8	2787	2786	17195	1588.75	5083.62	16890.1	1483.34	5452.11	16202.7	655.452	6736.01	21960.4	1526.93	2715.89	16887.3	1642.72
	2097.2	6077.7	25791.5	979	4699	25498				1081	4579	14038	7816.68	6518.36	20470.5	2169.9	3487.7	29246.3	3894.1	3746.9	15790.2	1696.2	5316.8	17246.5	945.1	3452.9	21987.7	1363.4	4411.6	22780.5	851.3	10801	23917.4	3574.5	4381.5	19383	2422.5	9104	22562	1254.87	5338	22056.2	637.039	7697.31	27658	1501.1	3253.5	20378.3	2066.9
	2628.8	6297.7	25118.4	758.5	3891	22644.3				1135.58	4899.81	14030.4	5171.26	4191.44	16811.7	1742.4	3170.5	26026.3	3908.5	5074.7	19810.3	1551.6	4192.9	16059.5	1258.8	4433.7	16646.8	1387.4	4422.2	25005.4	1503	14985.9	27551.3	2724	3563	17397	1727.04	5309.68	17381.6	1450	6026	19903	726.689	7204.51	23252.5	960.884	2118.77	14481.1	1820.69
	1903.3	4743.2	19048	662	2783	19823				1010.25	4588.75	13425.8	5385.44	4737.77	16957.3	1705.7	3026.1	23674	3180.1	4497.9	19302	2142.2	5742.4	19131.1	1127.5	4398.1	21650.2	1422.5	4564.8	24576.6	895.6	11587.2	25504.3	2708	2854	17654	2819.2	9172.17	22656	1491.36	5613.29	19631.1	658.632	6822.08	21361.8	2062.58	3263.44	22533.1	2127.45
	2286.3	5267.8	21437.5	1104	5345.2	25205.2				996	4313.5	13396.5	6539.61	5125.47	17586.5	1915.6	3067.9	20590.7	4170.8	4750.9	20067.3	1444.5	4420.4	14986.5	1425.7	5002.5	23083.7	1786	4718.8	22391.7	997.5	12183.8	25672.4	2681	3412	19019	1936.9	7265.71	24489.4	1117.52	4421.65	14742.3	659.628	7563.98	18102.2	2123.16	2662.85	20532.3	1740.41
	2016.7	5244.8	22170	722.3	3086.1	21145.2				1039	4691	13553	5719.63	5405.98	18011.6	2159.4	3327.1	25415.6	3199.1	4066	19787.4	1863.6	5952.7	20755.7	1558.1	5036.5	19470.5	1807.3	4700.8	21645	1382	13788	28019	2788.2	2944.29	19730.8	3043.87	8850.32	20838.1	1073	4681	19921	1031.15	11680.6	28218	1618.86	3170.35	21267.3	1606.1
	1768.4	4404.6	19047.7	640.4	3355.7	19580.8				1044	4446	13288	5652.63	4830.18	17986.2	2130.6	3837	26340.6	3617.2	4308.9	21364	1575.9	4808.2	17655.8	968.1	3395.2	17203.4	1502.5	4320.7	22417.7	1057.9	10209.9	21848.3	4085.52	4511.03	24484.2	1834.09	6252.55	25694.8	1158.29	4957.69	20754.8	629.135	6227	21510.8	1416.18	2523.21	16275	1809.25
				864	3823	23802				1161	4424	14636	3186.76	2336.22	13831.9	2227.3	3592.9	23047.3	3203	4465	21960.4	1595.7	4028	14813.3	969.4	3347.4	18336.7	1327.5	4745.7	24013.7	887.3	10174	24908.1	2681	3230	19338	1754	6091	26351	1048.08	4587.28	17896.9	576.333	5091.62	21165.4	1513.21	2484.29	16426.4	1598.73
				614	2961	21374				1264.35	4923.43	15209.5	5877.29	5484.65	19260.1	1546.2	2893.3	23780	3781.5	4201.8	16910.6	1470.1	4956.4	20923.1	1470.5	4283.6	17983	1422.8	4287	24085.2	1107.2	10000.5	23505.2	3523	3964	19886	1720	5938	21811	1076	4824	20533	730.576	8439.69	22901	990.677	2212.61	12562	1908.06
				1095.8	4870.1	22605.1				1242.17	5320.25	14262.2	6958.33	5823.17	23831.3	2481.4	3866.6	24023.6	3245.4	3953.6	19637.9	1939.9	6289.2	20786.7	749.6	3234.9	17189.9	1512	4274.9	21059.7	1200.7	12270.6	27381.8	2697.25	3350.25	18378.8	2852.17	9228.31	22522.8	1484.36	5566.64	20829.5	1132.05	11998.5	25111.3	1128.63	2139.05	15975.9	1862.58
				666	3052	20877				1398.71	5761.11	15918.9				2215.1	4029.7	24528.1	3639.5	4549.4	22313.5	1510.4	5398.2	21952	1067	3761	15228	1240.7	3851.4	23823.8	1029.5	11110.3	21573.7	2651	3202	19675	2452.14	8897.57	20941.9	997.966	4629.14	19969.8	734.875	7698.44	25444	1101.42	2011.03	14700.9
				1012	5005	21711				1013.85	5080.54	16290.5				2247	3035.7	20510	3397	4441.8	19588.3				1215.2	4365	19221.4	1262	4093.5	20880.1				3521	3924	19807	1860.52	7666.12	23724	1189.47	5841.19	22492.2	1060.01	11033	25394.1	1796.91	2987.66	27481.9
				660	3432	21242				1113	4795	14180							3253.5	4223.2	20484.3				1193.7	4502.3	17617.3	1298.9	4061.3	21952				3077.19	3759.68	21154	1753	6793	23786	1467.57	5222.14	19718.1	612.178	6025.55	21398.7	1152.84	2395.11	16932.6
				1021	5096	22799				1096.17	5300.07	17679.5							3234.3	4049.3	20737.4				1224	4482	16940	1316.4	4282.1	23011.2				2608.13	2718.02	18254.5	1734	6091	25426	1286	4722	14491	1538.1	18530.9	38126.3	1027.37	2147	14613.7
				1012	5043	21964				1264.93	5449.09	16954.2													780	3063	16917	1209.9	4012.8	21027.3				3348.67	4196.98	21120.4	1731	6015	22034	1295.4	4755.2	14967.2	1064.54	10454.2	26240.9	1592.48	2651.85	20809.1
				1068.9	4762.4	22668.4																			1109	3731	15944	1262.2	3925.2	19943.6				4186.81	4293.65	25672.9	1953.64	8699.79	25293.5	921	3799	15402	602.387	4883.02	22557.2	1741.36	2877.17	18781.8
				1010	4074	22346																			1551.8	5239.6	28570	1178.2	4043.8	23044.8				2508.34	2970.5	19668.2	2412	8131	23404	983	4711	19055	903.109	9747.53	24283.8	997.88	2370.95	15479
				1084.2	4626.1	21925.3																			1506.1	4679.9	18487.4	1177.2	4144.1	22921.2				4856.1	5868.07	26244.6	1709.52	6014.95	16910	1051.83	5126.58	19571.6	573.585	6319.17	16673.6	1764.13	2817.51	20167.6
				906	4098	21936																			1357.7	4528.6	26087.2							3903	5041	22538	1862.09	6334.19	20734.7	944.125	4050.75	13873.5	936.804	8486.41	26042.1	1788.33	2977.72	22552.8
				926.2	4163.4	21995.8																			998.4	3683.4	15189.7							4005.97	4367.06	27706.5	1771	5802	22692	969	4631	18361	931.551	9812.59	27368.9	1098.66	1734.22	13272.9
				1022	3825	20800																			1229.7	3529.3	18801.6							3981	4936	22139	2703.44	9273.27	20767.5	956	4823	18103	1053.31	13213.7	30094.8	1416.68	2406.47	14921.4
				1015.9	4461.9	23369.9																			1146.1	3914.9	20779.1							3914	5017	21852	2683.06	7856.1	22277.7	1206	5452	19894	1022.11	11653.8	26914.1	1193.77	2130.92	14849.3
				900.5	4022	22743																			1541	5241.4	21799.8							3912	5013	21556	1938.73	5841.45	22443.2	1036.92	4698.83	17550.5	988.8	10031	34993.4	1701.91	2844.58	20919.2
				969.7	4396.5	22623.4																			1285.2	4443.4	23342.6							4178.63	5209.9	23114.5	1894	6102	22946	1188	5108	20794	742.414	7178.38	24272.9	1188.79	2385.7	16122
				933	4530	22944																			1242.7	3993.2	22420							3905	5044	21820	1912	6004	22317	1209.5	5432	20798	1526	15919.6	37095.3	1519.02	3001.12	19446.7
				638.2	3487.9	22212.8																			871.6	2781.8	16726.1							2672.98	3411.63	18150.6	2103.35	7117.12	25743.5	1219	5174	21585	966.308	10494.3	29085.7	1274.45	2745.3	17115.2
				588	3046.5	18902																			1061	3922.2	21796.1							4392.14	5493.95	27094.1	2424	7221	24081	946.6	4963.95	19892	649.174	7747.09	20549.7	1272.56	2723.28	15488.1
				822.7	4205.4	22571.2																			1294.2	4722.3	20327							4008.62	5282.75	23978.9	2683.4	8803.06	18907				593.043	6420.04	20297.6	1412.98	2688.34	20541.9
				1138.1	4989.9	25829.6																			1046.6	3773.7	18785.8							2145	3155.88	18342.9	2486	8884	21789				953.304	11324.4	24753.6	1527.23	2595.15	16801.3
				746	3753	24216																			1090.4	3757.4	20303.5										2362.31	8028.12	21167.6				934.739	9259.57	24559.7	1632.66	3058.61	19229
				758	4068.3	22786																			1257.4	4605.3	24283.7										2287.58	8151.03	21710.2				1039.86	10367.7	30435.5	1415.36	2420.15	15710.9
				967.8	5128.8	22516.4																			1424.9	4471.7	27502.3										1813.88	7114.08	19498.3				1120.77	10522.8	24624.1	1435.06	2248.62	17150.6
				1167	5757.4	28772.1																			1826.6	6232.2	28465.3										2088.67	8627.67	22954.3				868.55	11092.2	25261.1	1228.61	2145.16	20359
				1135.8	4957.5	26120.7																			1536.5	5250.1	24339.6										1837.47	5932.08	19446.7				1029.95	12635.4	32402.5	1447.2	2391.13	17913.7
				1050.6	4697.3	23690.2																			1700.4	6035	29242.2										2216.57	9984.86	28123				1048.47	10344.5	28454.5	1533.67	2595.89	17875.5
				1112	4632	27386																			923.5	3218	21567.8										2390.57	8328.42	23314.2				881.938	9011.88	26879.7	1269.12	2375.52	18633.9
				1107.5	4783.9	25838.5																			1562.2	5575.4	25988										1889	6993	25190				1085.53	10502.6	32622	1238.92	1862.38	16027
				1005.7	4584.4	23007.1																			1141.5	3761.8	22006.7										2373.79	8413.73	21221				967.357	12479.2	25105.6	1486.05	2708.52	17866.1
				1073	4739	29256																			1729.6	6421.8	31985.7										1845.73	7786.78	20976.2				863.833	9465.17	28499.2	1112.57	1988.43	14876.8
				898	4554.5	22828																			843	3620.3	18141.5										2351.92	8386.86	21399.9							1485.65	2746.41	18332.4
				952	4938	25058																															1869.47	6264.17	25053.7							1700.79	3084.29	17877.8
				1040.5	5372.8	25460.2																															2472.84	8445.61	23995.7
				1013.9	5216.4	25271.2																															2097.44	7290.39	24958
				700.2	3581.5	21227.1																															1578.58	5959	19522.7
				993.4	5243.5	26883.4																															2665.92	8996	22960.6
				948.5	5166	26425																															1803.22	6463.64	19984.4
				981	4449	25343																															1627.4	6281.88	21683.2
				960	5188.5	24475
				955	5094	24609
				853.7	4153.7	27026.9
				978	4668	24103
				960	5007	25016
				958	4933	23960
				950	4976	24772
				996.5	4988.7	29522.3
				818	4189	26366
				975	4628	27706.5
				938	4681	27696
				971	4798	31946
				946	5045	30737
				967.8	4660	27875.3
				797.6	4355.8	21610.8
				957	4707	28550
				995.4	4400.2	25570
				789.8	4305.1	21786.5
				735	4402	23506
				705	4138	22739
				986.8	5438	24759.4
				689.4	3750.1	21792.8
				666.9	3900.5	22107.1
				607	3932	22809
				631	3630	20850
[truncated: 122 more columns]

## Sheet: Bg correction
	image 16 metaphase			image 16 anaphase			image 2 metaphase			image 2 anaphase			image 5 interphase			image 5 prometa			image 5 metaphase			image 5 metaphase			image 6 interphase			image 6 metaphase			image 6 anaphase			image 7 interphase			image 7 anaphase			image 7 metaphase			image 8 interphase			image 8 anaphase			image 8 prometaphase
	mCherry	BLM	RIF1	mCherry	BLM	RIF1	mCherry	BLM	RIF1	mCherry	BLM	RIF1	mCherry	BLM	RIF1	mCherry	BLM	RIF1	mCherry	BLM	RIF1	mCherry	BLM	RIF1	mCherry	BLM	RIF1	mCherry	BLM	RIF1	mCherry	BLM	RIF1	mCherry	BLM	RIF1	mCherry	BLM	RIF1	mCherry	BLM	RIF1	mCherry	BLM	RIF1	mCherry	BLM	RIF1	mCherry
background	2077.4	5490.4	22151.2	301.805	1453.45	10198.4	540.821	3488.75	13520.7	305.347	2214.59	13490.6	3960.25	2799.59	15342.4	1325	3366.9	27859.2	2622.4	4246.7	21334.4	1024.8	4396.3	18857.1	699	3079.9	15226.2	1022.2	4463.4	22923.2	665.3	9721	26841.3	1663.85	2031.5	12642.3	1244.06	4976.34	22080.1	714.993	4320.99	19126.7	355.251	3466.62	15424.7	338.34	1234.76	7906.48	1139.42
	631.8	134.2	463.4	428.195	2803.75	13241.8	612.321	851.408	29.9162	711.76	2903.48	2866.43	3160.46	2966.06	6836.52	243.3	-213.2	-5730.1	1017.8	521.8	738.5	538.5	1333.8	-203.3	252.8	395	4450	215.5	439.7	1311.8	889.7	4793.8	1121.9	2404.24	2624.85	9634.18	706.567	2089.55	-3210.63	302.656	98.8185	1427.73	362.611	4598.09	8234.87	1215.43	1525.17	10170.6	748.711
	54	598.7	3610.1	428.195	2122.55	11282.6	381.438	241.37	-595.312	790.849	2695.69	1555.66	2417.12	2259.03	3634.84	847.7	610.3	-1739.3	419.9	196.6	811.6	571	1760.8	-515.9	282.3	306.1	3661.6	750.3	-263.4	-3195.9	313	-794.2	-7426.1	1391.03	1420.33	7865.75	278.941	707.929	-4670.85	591.492	727.043	-2788.6	499.326	7413.39	13330.6	1287.95	2024.36	11731.7	1003.26
	335	331	-766.7	403.195	2547.55	12399.6	393.036	605.635	-266.729	877.32	2142.91	-780.685	4015.15	4408.32	6501.97	208.1	-172	-5524.1	719.6	227.8	139.5	1530.2	2148.8	-2449.7	500.3	927.6	5841.2	513.9	-56.3	-1693.1	637.1	3270.6	1211	1258.47	1334.2	7705.27	280.845	563.527	-3.00985	472.239	208.057	-1139.85	790.157	9213.88	14876.5	1694.56	2101.06	18000.4	1022.72
	1070.2	644.9	-16.2	787.495	3230.35	15726.1	543.371	1019.24	1794.53	1492.19	3805.75	572.401	2536.24	2777.59	4117.44	669.9	510.3	442.2	1439.3	1032.1	-204.8	538.3	1427.4	2288.6	1132.6	3153.3	11036.3	736.7	707	1603.9	857.4	4423	-334.7	1011.52	1359.53	6459.97	218.941	373.656	-5264.07	399.579	513.951	2180.7	369.397	4203.34	7906.92	1085.77	1225.98	8214.71	905.502
	1142.8	1221.2	410.6	434.995	1875.15	10519.4	430.853	598.694	232.636	932.265	3478.25	2740.36	2746.88	3278.39	3211.31	706.8	359	-4116.1	1449.1	930.6	64.5	1438	2129.2	-609.3	305.1	908.7	4846	414.6	422.4	1386.7	454.4	2702	2611.4	2093.02	2337.07	8540.41	926.869	3669.78	1208.11	1449.47	2881.2	2756.58	299.749	3274.39	4582.58	1101.14	1630.41	10673.1	960.871
	2055.8	1463.8	1164.1	693.195	3100.55	14792.6	810.088	1733	2698.42	776.605	3199.12	3755.16	2417.83	1825.16	3274.76	-109.8	-105.3	-1112	1654	490.4	-1497.5	654.6	1024.5	-2604.2	787.7	1003.2	7354.4	556	591.8	2948.1	311.8	1561.9	2561.3	663.154	678.5	3018.73	580.418	2394.8	-78.6934	320.007	828.534	4660.85	352.539	4142.52	3430.18	1231.54	1394.17	8956.02	513.213
	1062.5	185.3	-72.8	577.195	2836.55	12531	318.346	151.431	-919.485	713.178	2286.52	-560.94	2309.86	2106.01	5515.92	28	-294.6	-4921.6	1128.7	237.4	-345.3	392.1	1058.4	5558.1	849.3	1643.1	7168.5	1054.3	881.4	675.9	783.1	3480.6	1952.8	1321.09	1665.26	6224.55	275.941	-190.344	642.926	824.506	1204.75	397.061	309.649	3296.84	5964.19	1017.77	1318.37	9226.34	1163.55
	769.6	715.6	1286.8	306.095	1574.95	8584.24	396.289	169.747	-816.407	709.425	2749.13	15.2337	4232.15	4366.04	9151.49	725.5	385.1	-918.6	1581	355	-1521.3	1484.1	1803.1	1797.8	1011.8	2482	11748	296	-1238.4	-6315.3	178.6	1154.7	-1734.5	1518.89	1602.24	7189.02	570.576	2234.7	2781.12	525.241	908.333	2581.64	788.805	8473.96	16241.5	1015.5	1500.71	8186.43	600.377
	805.1	758	1754.4	515.195	2293.55	12503.1	211.091	776.283	1729.77	955.059	3203.15	253.654	2402.73	2781.55	5486.46	383.9	105.4	-3324.1	1421.3	290.1	-1171	1474	1607.3	-1433.9	352.5	630.6	6563.6	970.8	1065.3	2993.1	903.1	5188.9	1216.4	905.154	941.5	3707.73	1122.67	3526.91	-1640.51	409.007	1246.01	2746.27	410.511	3790.27	9391.76	714.086	1031.52	7048.2	852.53
	405.5	1155.4	1809.7	630.895	2583.95	14642.3	284.664	293.97	1430.7	914.214	3237.27	554.536	2414.9	2253.62	4543.96	844.8	317	2015.5	763.6	-54.4	-2482.2	620.3	1265.3	3860.6	1183.5	2797	12010.5	466.8	262.1	1215.6	221.7	138.9	-2245.1	1041.06	1471.77	5831.04	1036.22	2722.34	-1005.13	988.007	2522.01	2617.27	326.561	2525.74	5935.61	1036.97	1381.18	11161	626.687
	723.1	1076.6	2235.8	344.195	1670.55	10164.6	218.485	566.47	1528.97	676.653	1561.41	778.357	3768.69	3726.74	3846.6	1118.3	578.9	1335.6	1024.1	429.3	-1815.4	1514.3	2055.9	3966.3	564.2	1284.6	1423.2	357.7	-1185	-4785.9	429.7	-879	-3964.3	1884.95	2803.62	8815.04	1124.8	2791.14	-3314.84	804.105	1407.7	-836.92	289.659	2296.38	5050.63	1213.35	1591.49	10933.4	731.226
	1303.3	1415.4	1944.7	725.995	2771.35	13380.2	297.697	761.781	2672.87	700.653	1938.41	1447.36	2081.7	1792.44	5226.07	463.2	274.4	-3488.4	878	535.8	-2136.5	748	1035.7	-97.7	569	1219.1	3321.8	426.8	-685.4	-3586.2	274.1	1744.9	-1693.3	2401.05	2954.17	11429.8	819.634	2533.66	450.741	1022.01	2117.01	1234.27	349.594	5376.26	9131.91	648.755	746.138	5779.02	499.158
	1266.9	906.4	1186.9	601.295	3119.65	13129.1	611.459	713.654	-257.813	675.653	1879.41	974.357	3841.29	4732.81	4310.36	756.7	511.8	1394.7	2338.9	1262.1	-2192.3	953.5	2382.6	7136.7	915.6	1927.4	3813.9	601.6	333.6	631.1	463	1226.3	-2749.6	1744.6	2573.31	4202.71	750.227	2091.59	54.1501	480.007	-98.9923	-567.728	809.372	10289.7	15480.1	1637.47	2415.3	16271.4	564.236
	552.5	243.8	1105.8	360.695	1861.55	9387.14	492.249	1355.14	2563.03	841.826	3171.32	-1204.73	1390.63	1232.69	2120.66	876.9	175.6	-3023.3	438.5	-490.7	-4872.5	1869.3	2356.9	3124.2	522.3	1344.8	3671.8	476.8	-624.4	-3411.2	343.2	1582.1	-1393.1	1416.63	1927.23	8951.39	572.941	4214.66	-2222.07	378.288	292.604	2268.96	278.42	2693.99	8890.15	1527.18	1679.94	12799.3	1216.13
	947.7	1336.7	3675.3	309.395	1833.95	6218.84	330.114	201.544	-1086.87	749.561	3215.06	2805.43	4636.11	5261.92	6123.76	622.5	119.8	138.3	2070.6	938.5	-1298	395	1192.7	4056.6	552.1	1373.3	10158.5	282.6	-115.2	-1960.6	514.7	2411.7	-1570.7	1471.63	1590.41	7028.24	677.025	2812.86	302.609	329.007	166.008	2485.27	285.787	3847.47	7416.39	684.311	854.237	7126.07	451.323
	2851.7	2013.9	1438.1	746.695	2525.55	13171.2	157.272	11.1142	-1190.86	633.653	1763.41	7.35651	1929.13	2150.73	2854.16	431.3	232.7	-1858.2	407.6	-1013	-5792.3	501.9	1472	4671.6	755.8	1669.5	3819.7	759.9	298	1625.6	260.9	830.8	-1429.2	2951.21	3905.53	11421.2	1300.77	4534.7	-590.64	583.8	319.683	376.155	328.795	2688.69	7164.46	1162.02	1188.62	9623.93	551.854
	1156.8	925.8	2517.8	692.195	3052.55	14388.1	176.206	505.281	-276.511	625.415	2388.86	-884.001	1537.17	1753.89	3328.03	591	148.9	-1239.1	2813.5	1010.2	-2625.8	656.9	1195.4	6156.6	532	1286.1	4350.8	1031.7	1037	1005.5	259.7	-18.7	-2517.5	2623.1	3071.2	10479.5	1406.99	4021.8	495.261	489.507	538.508	289.772	520.223	5519.4	12716.8	733.144	1205.74	7484.36	485.303
	2646.9	1984.3	3185.5	723.195	3102.55	14283.6	216.476	421.01	1111.95	547.653	2645.41	-1139.64	1189.34	950.97	1520.09	595.6	-234.7	-5689.9	2074.3	604.2	-1494.7	1657	2045.1	733	508.3	1609	9265.3	292.9	-81.4	-886.7	849.6	5489.1	3054.9	1495.95	1869.89	7844.77	1016.82	4096.87	-539.15	308.285	212.883	-828.533	267.137	2601.74	6126.55	1340.93	1788.35	12068.7	759.616
	1701.6	1136	-611.7	700.195	3243.55	15668.6	139.064	-512.861	-2862.93	952.356	2952.38	864.006	1154.54	2282.16	2166.26	357.7	-613.1	-5534.2	1244.5	472.4	-1475.2	1054.2	1750	2541.9	979	2497.7	5115.1	482.1	-351.3	-1300.4	436.3	1440.4	1458.5	1442.25	1765.58	9665.94	1340.21	4340.25	1161.39	616.007	246.008	-232.728	303.605	3250.73	7054.45	947.66	1284.44	8864.38	630.646
	424.1	1056.8	4395.5	698.195	3074.05	14846.6	160.937	82.4261	-301.501	544.653	1777.41	-372.643	1650.06	1552.01	3655.08	430.1	-95.2	-2632.2	2212.6	959	-311.2	432.7	1123.7	5572.3	657.4	1245.2	6201.9	767.5	683.2	3153.5	392.1	3045.5	735	1435.95	2043.53	7873.44	838.441	3043.32	-460.074	448.007	473.008	1720.27	636.938	7601.34	14620.8	860.227	1153.81	7127.31	582.788
	-168.3	-332.3	-2123.5	677.195	3096.55	14113.6				625.903	2221.16	427.232	2321.08	2657.96	3312.23	521.6	174	1946.8	2062	967.4	-2067.8	1650.6	2261.1	683.6	507.2	1051.7	7736.2	677.3	-133.8	-404.2	776.4	4020.5	2268.5	1924.75	3168.3	11767.3	714.54	1981.53	2392.04	640.007	796.008	-758.728	750.882	10626.3	14378	937.952	1258.12	9947.78	519.311
	1000.1	1643.9	2604.8	676.195	2834.55	14250.6				631.142	2423.72	8212.67	2071.9	1280.1	4459.29	934.5	-47.2	-1553	1565.4	182.6	-4510.4	409.7	256.6	-2352.3	759.9	1545.4	15409.1	175.2	-110.3	-1730.8	389	1057.5	-2793.5	1123.15	754.5	4552.73	344.691	107.281	-5189.99	768.346	1131.12	-2924.06	300.202	3269.39	6535.68	1188.59	1481.13	8980.83	503.297
	19.8	587.3	3640.3	677.195	3245.55	15299.6				775.653	2364.41	547.357	3856.43	3718.77	5128.1	844.9	120.8	1387.1	1271.7	-499.8	-5544.2	671.4	920.5	-1610.6	246.1	373	6761.5	341.2	-51.8	-142.7	186	1080	-2923.9	1910.65	2350	6740.73	1178.44	4127.66	481.926	539.874	1017.01	2929.42	281.788	4230.69	12233.3	1162.76	2018.74	12471.8	927.471
	551.4	807.3	2967.2	456.695	2437.55	12445.9				830.236	2685.22	539.752	1211.02	1391.85	1469.25	417.4	-196.4	-1832.9	1286.1	828	-1524.1	526.8	-203.4	-2797.6	559.8	1353.8	1420.6	365.2	-41.2	2082.2	837.7	5264.9	710	1060.15	1531.5	4754.73	482.981	333.336	-4698.43	735.007	1705.01	776.272	371.438	3737.89	7827.72	622.544	884.011	6574.61	681.261
	-174.1	-747.2	-3103.2	360.195	1329.55	9624.64				704.903	2374.16	-64.8935	1425.19	1938.18	1614.89	380.7	-340.8	-4185.2	557.7	251.2	-2032.4	1117.4	1346.1	274	428.5	1318.2	6424	400.3	101.4	1653.4	230.3	1866.2	-1337	1044.15	822.5	5011.73	1575.14	4195.83	575.931	776.363	1292.3	504.389	303.382	3355.46	5937.01	1724.24	2028.69	14626.7	988.024
	208.9	-222.6	-713.7	802.195	3891.75	15006.8				690.653	2098.91	-94.1435	2579.36	2325.88	2244.11	590.6	-299	-7268.5	1548.4	504.2	-1267.1	419.7	24.1	-3870.6	726.7	1922.6	7857.5	763.8	255.4	-531.5	332.2	2462.8	-1168.9	1017.15	1380.5	6376.73	692.84	2289.37	2409.3	402.53	100.654	-4384.4	304.378	4097.36	2677.45	1784.82	1428.1	12625.8	600.981
	-60.7	-245.6	18.8	420.495	1632.65	10946.8				733.653	2476.41	62.3565	1759.39	2606.39	2669.17	834.4	-39.8	-2443.6	576.7	-180.7	-1547	838.8	1556.4	1898.6	859.1	1956.6	4244.3	785.1	237.4	-1278.2	716.7	4067	1177.7	1124.35	912.787	7088.53	1799.82	3873.98	-1241.94	358.007	360.008	794.272	675.9	8213.96	12793.3	1280.52	1935.59	13360.9	466.68
	-309	-1085.8	-3103.5	338.595	1902.25	9382.44				738.653	2231.41	-202.643	1692.38	2030.59	2643.76	805.6	470.1	-1518.6	994.8	62.2	29.6	551.1	411.9	-1201.3	269.1	315.3	1977.2	480.3	-142.7	-505.5	392.6	488.9	-4993	2421.67	2479.53	11841.9	590.027	1276.21	3614.76	443.298	636.699	1628.05	273.885	2760.38	6086.06	1077.84	1288.46	8368.51	669.825
				562.195	2369.55	13603.6				855.653	2209.41	1145.36	-773.486	-463.377	-1510.49	902.3	226	-4811.9	580.6	218.3	626	570.9	-368.3	-4043.8	270.4	267.5	3110.5	305.3	282.3	1090.5	222	453	-1933.2	1017.15	1198.5	6695.73	509.941	1114.66	4270.93	333.084	266.29	-1229.8	221.083	1625	5740.66	1174.87	1249.53	8519.89	459.31
				312.195	1507.55	11175.6				959.001	2708.84	1718.89	1917.05	2685.05	3917.68	221.2	-473.6	-4079.2	1159.1	-44.9	-4423.8	445.3	560.1	2066	771.5	1203.7	2756.8	400.6	-176.4	1162	441.9	279.5	-3336.1	1859.15	1932.5	7243.73	475.941	961.656	-269.074	361.007	503.008	1406.27	375.326	4973.08	7476.25	652.337	977.858	4655.49	768.634
				793.995	3416.65	12406.7				936.82	3105.66	771.539	2998.09	3023.57	8488.91	1156.4	499.7	-3835.6	623	-293.1	-1696.5	915.1	1892.9	1929.6	50.6	155	1963.7	489.8	-188.5	-1863.5	535.4	2549.6	540.5	1033.4	1318.75	5736.48	1608.11	4251.96	442.727	769.371	1245.64	1702.82	776.798	8531.84	9686.53	790.291	904.296	8069.45	723.156
				364.195	1598.55	10678.6				1093.37	3546.52	2428.25				890.1	662.8	-3331.1	1017.1	302.7	979.1	485.6	1001.9	3094.9	368	681.1	1.8	218.5	-612	900.6	364.2	1389.3	-5267.6	987.154	1170.5	7032.73	1208.08	3921.23	-1138.22	282.973	308.143	843.052	379.624	4231.82	10019.3	763.077	776.276	6794.38
				710.195	3551.55	11512.6				708.499	2865.95	2799.85				922	-331.2	-7349.2	774.6	195.1	-1746.1				516.2	1285.1	3995.2	239.8	-369.9	-2043.1				1857.15	1892.5	7164.73	616.461	2689.77	1643.91	474.48	1520.19	3365.49	704.762	7566.41	9969.3	1458.57	1752.9	19575.4
				358.195	1978.55	11043.6				807.653	2580.41	689.357							631.1	-23.5	-850.1				494.7	1422.4	2391.1	276.7	-402.1	-971.2				1413.34	1728.18	8511.73	508.941	1816.66	1705.93	752.579	901.151	591.415	256.928	2558.93	5973.99	814.499	1160.36	9026.11
				719.195	3642.55	12600.6				790.82	3085.48	4188.82							611.9	-197.4	-597				525	1402.1	1713.8	294.2	-181.3	88				944.283	686.517	5612.23	489.941	1114.66	3345.93	571.007	401.008	-4635.73	1182.85	15064.3	22701.6	689.025	912.243	6707.19
				710.195	3589.55	11765.6				959.588	3234.5	3463.57													81	-16.9	1690.8	187.7	-450.6	-1895.9				1684.82	2165.48	8478.12	486.941	1038.66	-46.0744	580.407	434.208	-4159.53	709.285	6987.54	10816.2	1254.14	1417.09	12902.6
				767.095	3308.95	12470																			410	651.1	717.8	240	-538.2	-2979.6				2522.96	2262.15	13030.7	709.584	3723.44	3213.38	206.007	-521.992	-3724.73	247.137	1416.4	7132.49	1403.02	1642.41	10875.3
				708.195	2620.55	12147.6																			852.8	2159.7	13343.8	156	-419.6	121.6				844.495	938.996	7025.9	1167.94	3154.66	1323.93	268.007	390.008	-71.7279	547.859	6280.91	8859.07	659.54	1136.19	7572.48
				782.395	3172.65	11726.9																			807.1	1600	3261.2	155	-319.3	-2				3192.26	3836.57	13602.3	465.465	1038.61	-5170.07	336.834	805.585	444.868	218.334	2852.55	1248.89	1425.79	1582.75	12261.1
				604.195	2644.55	11737.6																			658.7	1448.7	10861							2239.15	3009.5	9895.73	618.028	1357.85	-1345.35	229.132	-270.242	-5253.23	581.553	5019.79	10617.3	1449.99	1742.97	14646.3
				624.395	2709.95	11797.4																			299.4	603.5	-36.5							2342.12	2335.56	15064.2	526.941	825.656	611.926	254.007	310.008	-765.728	576.301	6345.97	11944.1	760.316	499.467	5366.43
				720.195	2371.55	10601.6																			530.7	449.4	3575.4							2317.15	2904.5	9496.73	1459.38	4296.93	-1312.57	241.007	502.008	-1023.73	698.057	9747.1	14670.1	1078.34	1171.71	7014.89
				714.095	3008.45	13171.5																			447.1	835	5552.9							2250.15	2985.5	9209.73	1439	2879.76	197.646	491.007	1131.01	767.272	666.861	8187.19	11489.3	855.426	896.16	6942.8
				598.695	2568.55	12544.6																			842	2161.5	6573.6							2248.15	2981.5	8913.73	694.669	865.111	363.107	321.924	377.841	-1576.23	633.549	6564.38	19568.7	1363.57	1609.82	13012.8
				667.895	2943.05	12425																			586.2	1363.5	8116.4							2514.79	3178.4	10472.2	649.941	1125.66	865.926	473.007	787.008	1667.27	387.163	3711.76	8848.15	850.452	1150.94	8215.53
				631.195	3076.55	12745.6																			543.7	913.3	7193.8							2241.15	3012.5	9177.73	667.941	1027.66	236.926	494.507	1111.01	1671.27	1170.75	12453	21670.6	1180.68	1766.36	11540.2
				336.395	2034.45	12014.4																			172.6	-298.1	1499.9							1009.13	1380.14	5508.31	859.288	2140.78	3663.39	504.007	853.008	2458.27	611.057	7027.65	13660.9	936.114	1510.54	9208.7
				286.195	1593.05	8703.64																			362	842.3	6569.9							2728.29	3462.46	14451.8	1179.94	2244.66	2000.93	231.607	642.958	765.272	293.923	4280.47	5124.99	934.218	1488.52	7581.63
				520.895	2751.95	12372.8																			595.2	1642.4	5100.8							2344.78	3251.25	11336.6	1439.35	3826.71	-3173.03				237.793	2953.43	4872.82	1074.64	1453.58	12635.4
				836.295	3536.45	15631.2																			347.6	693.8	3559.6							481.154	1124.38	5700.6	1241.94	3907.66	-291.074				598.054	7857.77	9328.82	1188.89	1360.4	8894.82
				444.195	2299.55	14017.6																			391.4	677.5	5077.3										1118.25	3051.77	-912.489				579.489	5792.95	9134.95	1294.32	1823.85	11322.5
				456.195	2614.85	12587.6																			558.4	1525.4	9057.5										1043.52	3174.68	-369.856				684.613	6901.11	15010.7	1077.02	1185.39	7804.39
				665.995	3675.35	12318																			725.9	1391.8	12276.1										569.826	2137.73	-2581.73				765.522	7056.15	9199.34	1096.72	1013.87	9244.08
				865.195	4303.95	18573.7																			1127.6	3152.3	13239.1										844.608	3651.32	874.259				513.299	7625.58	9836.35	890.273	910.404	12452.5
				833.995	3504.05	15922.3																			837.5	2170.2	9113.4										593.414	955.739	-2633.35				674.697	9168.8	16977.8	1108.86	1156.38	10007.2
				748.795	3243.85	13491.8																			1001.4	2955.1	14016										972.51	5008.52	6042.97				693.223	6877.86	13029.7	1195.33	1361.13	9969
				810.195	3178.55	17187.6																			224.5	138.1	6341.6										1146.51	3352.07	1234.17				526.687	5545.26	11454.9	930.78	1140.76	10727.4
				805.695	3330.45	15640.1																			863.2	2495.5	10761.8										644.941	2016.66	3109.93				730.283	7035.98	17197.3	900.576	627.618	8120.47
				703.895	3130.95	12808.7																			442.5	681.9	6780.5										1129.73	3437.38	-859.118				612.107	9012.6	9680.89	1147.71	1473.77	9959.66
				771.195	3285.55	19057.6																			1030.6	3341.9	16759.5										601.667	2810.44	-1103.92				508.583	5998.55	13074.5	774.231	753.672	6970.32
				596.195	3101.05	12629.6																			144	540.4	2915.3										1107.86	3410.52	-680.139							1147.31	1511.65	10425.9
				650.195	3484.55	14859.6																															625.408	1287.82	2973.66							1362.45	1849.53	9971.3
				738.695	3919.35	15261.8																															1228.78	3469.26	1915.67
				712.095	3762.95	15072.8																															853.381	2314.05	2877.93
				398.395	2128.05	11028.7																															334.52	982.656	-2557.39
				691.595	3790.05	16685																															1421.86	4019.66	880.552
				646.695	3712.55	16226.6																															559.164	1487.3	-2095.71
				679.195	2995.55	15144.6																															383.341	1305.53	-396.874
				658.195	3735.05	14276.6
				653.195	3640.55	14410.6
				551.895	2700.25	16828.5
				676.195	3214.55	13904.6
				658.195	3553.55	14817.6
				656.195	3479.55	13761.6
				648.195	3522.55	14573.6
				694.695	3535.25	19323.9
				516.195	2735.55	16167.6
				673.195	3174.55	17508.1
				636.195	3227.55	17497.6
				669.195	3344.55	21747.6
				644.195	3591.55	20538.6
				665.995	3206.55	17676.9
				495.795	2902.35	11412.4
				655.195	3253.55	18351.6
				693.595	2946.75	15371.6
				487.995	2851.65	11588.1
				433.195	2948.55	13307.6
				403.195	2684.55	12540.6
				684.995	3984.55	14561
				387.595	2296.65	11594.4
				365.095	2447.05	11908.7
				305.195	2478.55	12610.6
				329.195	2176.55	10651.6
[truncated: 122 more columns]

## Sheet: Fig 3C_Ratio mitotic phases
		RATIO					RATIO NORMALISED TO METAPHASE		1.01286			RATIO NORMALISED TO INTERPHASE		3.09395
		Interphase	Prometaphase	metaphase	anaphase		Interphase	Prometaphase	metaphase	anaphase		Interphase	Prometaphase	metaphase	anaphase
	1	1.06	0	2.7	4.97		1.04654	0	2.66573	4.90691		0.342604	0	0.872672	1.60636
	2	2.1	1.22	1.3	3.36		2.07334	1.20451	1.2835	3.31735		0.678745	0.394318	0.420175	1.08599
	3	1.22	2.29	0.14	4.12		1.20451	2.26093	0.138223	4.0677		0.394318	0.740155	0.0452496	1.33163
	4	11.29	1.58	1.6	2.85		11.1467	1.55994	1.57969	2.81382		3.64906	0.510674	0.517139	0.921153
	5	8.18	3.33	0	1.25		8.07616	3.28773	0	1.23413		2.64387	1.07629	0	0.404015
	6	2.42	1.06	1.31	1.57		2.38928	1.04654	1.29337	1.55007		0.782172	0.342604	0.423407	0.507442
	7	2.28	0.68	2.11	2.58		2.25106	0.671368	2.08322	2.54725		0.736923	0.219784	0.681977	0.833886
	8	3.4	1.27	0.21	1.57		3.35684	1.25388	0.207334	1.55007		1.09892	0.410479	0.0678745	0.507442
	9	2.9	1.21	1.38	1.78		2.86319	1.19464	1.36248	1.7574		0.937314	0.391086	0.446032	0.575317
	10	1.35	1.76	0.53	0.22		1.33286	1.73766	0.523272	0.217207		0.436336	0.568853	0.171302	0.0711066
	11	1.4		0.48	2.43		1.38223		0.473907	2.39915		0.452496		0.155142	0.785404
	12	3		0.48	1.73		2.96192		0.473907	1.70804		0.969635		0.155142	0.559156
	13	1.99		1.18			1.96474		1.16502			0.643191		0.38139
	14	2.3		0.76			2.2708		0.750353			0.743387		0.245641
	15	2.19					2.1622					0.707834
	16	2.485					2.45346					0.803181
	17	4.501					4.44386					1.45478
	18	2.477					2.44556					0.800595
	19	2.242					2.21354					0.724641

## Sheet: Fig 3C_Combined graphs
interphase		prometaphase		metaphase		anaphase
			prophase

## Sheet: Ratio
	image 16 interphase			image 16 metaphase			image 16 anaphase			image 2 metaphase			image 2 anaphase			image 5 interphase			image 5 prometa			image 5 metaphase			image 5 metaphase			image 6 interphase			image 6 metaphase			image 6 anaphase			image 7 interphase			image 7 anaphase			image 7 metaphase			image 8 interphase			image 8 anaphase
	mCherry	BLM	RIF1	mCherry	BLM	RIF1	mCherry	BLM	RIF1	mCherry	BLM	RIF1	mCherry	BLM	RIF1	mCherry	BLM	RIF1	mCherry	BLM	RIF1	mCherry	BLM	RIF1	mCherry	BLM	RIF1	mCherry	BLM	RIF1	mCherry	BLM	RIF1	mCherry	BLM	RIF1	mCherry	BLM	RIF1	mCherry	BLM	RIF1	mCherry	BLM	RIF1	mCherry	BLM	RIF1	mCherry
ratio		#REF!	#REF!		0.212409	0.73346		6.54783	30.9248		1.39046	0.0488571		4.0793	4.02724		0.938488	2.16314		-0.876284	-23.5516		0.512674	0.725585		2.47688	-0.37753		1.5625	17.6028		2.04037	6.08724		5.38811	1.26099		1.09176	4.00715		2.95732	-4.54398		0.326504	4.71734		12.6805	22.71
		#REF!	#REF!		11.087	66.8537		4.95697	26.3493		0.632789	-1.5607		3.40861	1.96707		0.934595	1.50379		0.719948	-2.05179		0.468207	1.93284		3.08371	-0.903503		1.08431	12.9706		-0.35106	-4.2595		-2.53738	-23.7256		1.02107	5.65462		2.53791	-16.7449		1.22917	-4.71452		14.8468	26.6973
		#REF!	#REF!		0.98806	-2.28866		6.31841	30.7535		1.54092	-0.678639		2.44256	-0.889852		1.09792	1.61936		-0.826526	-26.5454		0.316565	0.193858		1.40426	-1.6009		1.85409	11.6754		-0.109554	-3.29461		5.13357	1.9008		1.06018	6.12274		2.00654	-0.0107171		0.440575	-2.41371		11.6608	18.8273
		#REF!	#REF!		0.602598	-0.0151374		4.10206	19.9698		1.87577	3.3026		2.55045	0.383598		1.09516	1.62344		0.761755	0.660099		0.717085	-0.142291		2.65168	4.25153		2.78413	9.74422		0.959685	2.17714		5.15862	-0.390366		1.34405	6.3864		1.70665	-24.0433		1.28623	5.4575		11.3789	21.4049
		#REF!	#REF!		1.0686	0.359293		4.31074	24.1829		1.38955	0.539941		3.73096	2.93946		1.1935	1.16908		0.507923	-5.82357		0.642192	0.0445104		1.48067	-0.423713		2.97837	15.8833		1.01881	3.34467		5.9463	5.74692		1.1166	4.08043		3.95933	1.30343		1.98776	1.90178		10.9237	15.288
		#REF!	#REF!		0.712034	0.566252		4.47284	21.3398		2.13928	3.33102		4.11937	4.83536		0.754874	1.35442		0.959016	10.1275		0.296493	-0.905381		1.56508	-3.97831		1.27358	9.33655		1.06439	5.30234		5.0093	8.21456		1.02314	4.55207		4.12599	-0.135581		2.58911	14.5648		11.7505	9.72995
		#REF!	#REF!		0.1744	-0.0685176		4.91437	21.7102		0.475682	-2.88832		3.20609	-0.786536		0.911746	2.38799		-10.5214	-175.771		0.21033	-0.305927		2.69931	14.1752		1.93465	8.44048		0.836005	0.641089		4.44464	2.49368		1.26052	4.71169		-0.689798	2.32993		1.46117	0.481575		10.647	19.2611
		#REF!	#REF!		0.929834	1.67204		5.1453	28.0444		0.428342	-2.06013		3.87515	0.0214733		1.03164	2.16237		0.530806	-1.26616		0.224541	-0.962239		1.21495	1.21137		2.45305	11.611		-4.18378	-21.3355		6.46529	-9.71165		1.05487	4.73307		3.91658	4.87424		1.72936	4.91515		10.7428	20.59
		#REF!	#REF!		0.941498	2.17911		4.45181	24.2688		3.67748	8.19444		3.35388	0.26559		1.15766	2.28343		0.274551	-8.65877		0.204109	-0.823894		1.09043	-0.972795		1.78894	18.6201		1.09734	3.08313		5.74565	1.34692		1.04015	4.09624		3.14152	-1.46125		3.04642	6.71448		9.23305	22.8782
		#REF!	#REF!		2.84932	4.46289		4.09569	23.2088		1.03269	5.02593		3.54103	0.606571		0.933217	1.88164		0.375237	2.38577		-0.0712415	-3.25065		2.03982	6.22376		2.36333	10.1483		0.561482	2.60411		0.626522	-10.1267		1.41373	5.60108		2.62719	-0.970002		2.55262	2.64904		7.73436	18.1761
		#REF!	#REF!		1.48887	3.09197		4.8535	29.5317		2.59272	6.99804		2.30755	1.1503		0.988869	1.02067		0.517661	1.19431		0.419197	-1.77268		1.35766	2.61923		2.27685	2.52251		-3.31283	-13.3796		-2.04561	-9.22574		1.48737	4.67653		2.48147	-2.94706		1.75064	-1.04081		7.92785	17.4364
		#REF!	#REF!		1.08601	1.49214		3.81731	18.4302		2.55891	8.9785		2.76658	2.06572		0.861042	2.51047		0.592401	-7.53109		0.610251	-2.43337		1.38463	-0.130615		2.14253	5.83796		-1.6059	-8.40253		6.36592	-6.17767		1.23037	4.76034		3.09121	0.54993		2.07142	1.20769		15.3786	26.1214
		#REF!	#REF!		0.715447	0.936854		5.18822	21.8348		1.16713	-0.421636		2.78162	1.4421		1.23209	1.12211		0.676358	1.84313		0.539613	-0.937321		2.49879	7.48474		2.10507	4.16547		0.554521	1.04904		2.6486	-5.93866		1.47501	2.40898		2.78795	0.0721783		-0.206231	-1.18275		12.7132	19.126
		#REF!	#REF!		0.441267	2.00145		5.16101	26.0252		2.75296	5.20678		3.7672	-1.43109		0.886421	1.52496		0.200251	-3.44771		-1.11904	-11.1117		1.26085	1.67132		2.57477	7.03006		-1.30956	-7.15436		4.60985	-4.05915		1.36043	6.31878		7.35617	-3.87836		0.773496	5.99796		9.67602	31.9308
		#REF!	#REF!		1.41047	3.87813		5.92753	20.1		0.610529	-3.2924		4.28926	3.74277		1.13499	1.32088		0.19245	0.222169		0.45325	-0.626871		3.01949	10.2699		2.48741	18.3997		-0.407643	-6.93772		4.68564	-3.05168		1.08071	4.77581		4.15473	0.446969		0.504571	7.55385		13.4627	25.9507
		#REF!	#REF!		0.70621	0.504296		3.3823	17.6394		0.0706687	-7.57199		2.78293	0.0116097		1.11487	1.47951		0.539532	-4.30837		-2.48528	-14.2107		2.93286	9.30783		2.20892	5.05385		0.392157	2.13923		3.18436	-5.47796		1.32336	3.87001		3.48617	-0.45407		0.54759	0.644322		8.1774	21.79
		#REF!	#REF!		0.800311	2.17652		4.40996	20.7863		2.86756	-1.56925		3.81964	-1.41346		1.14099	2.16504		0.251946	-2.09662		0.359055	-0.933286		1.81976	9.3722		2.41748	8.1782		1.00514	0.974605		-0.0720062	-9.69388		1.17083	3.9951		2.85845	0.352001		1.1001	0.591967		10.6097	24.4448
		#REF!	#REF!		0.749669	1.20348		4.29006	19.7508		1.94484	5.13659		4.83045	-2.08096		0.799576	1.27809		-0.394056	-9.55322		0.291279	-0.72058		1.23422	0.442366		3.16545	18.228		-0.277911	-3.02731		6.46081	3.59569		1.24997	5.24401		4.0291	-0.530231		0.690538	-2.68756		9.73936	22.9341
		#REF!	#REF!		0.667607	-0.359485		4.63235	22.3775		-3.68794	-20.5871		3.10008	0.90723		1.97668	1.87629		-1.71401	-15.4716		0.37959	-1.18538		1.66003	2.41121		2.55128	5.22482		-0.728687	-2.69737		3.3014	3.34288		1.22418	6.70198		3.23848	0.866571		0.399358	-0.377801		10.7071	23.2356
		#REF!	#REF!		2.49187	10.3643		4.40285	21.2643		0.512163	-1.87341		3.26338	-0.684185		0.94058	2.21512		-0.221344	-6.11997		0.433427	-0.140649		2.59695	12.878		1.89413	9.43398		0.890163	4.10879		7.76715	1.87452		1.42312	5.48308		3.62974	-0.548726		1.0558	3.83983		11.9342	22.9548
		#REF!	#REF!		1.97445	12.6173		4.57261	20.8413					3.54873	0.682584		1.14514	1.42702		0.333589	3.73236		0.469156	-1.00281		1.36987	0.414152		2.07354	15.2528		-0.197549	-0.596781		5.17839	2.92182		1.64608	6.11368		2.77315	3.34767		1.24375	-1.1855		14.1517	19.1481
		#REF!	#REF!		1.64374	2.60454		4.19191	21.0748					3.84022	13.0124		0.617837	2.15226		-0.0505083	-1.66185		0.116648	-2.88131		0.626312	-5.74152		2.03369	20.2778		-0.629566	-9.879		2.71851	-7.18123		0.671769	4.05352		0.311238	-15.0569		1.47215	-3.80566		10.8906	21.771
		#REF!	#REF!		29.6616	183.854		4.79264	22.5927					3.04828	0.705672		0.964304	1.32975		0.142976	1.64173		-0.393017	-4.35968		1.37102	-2.39887		1.51564	27.4746		-0.151817	-0.41823		5.80645	-15.7199		1.22995	3.52797		3.50264	0.408952		1.88379	5.42612		15.0137	43.4129
		#REF!	#REF!		1.46409	5.38121		5.33737	27.2522					3.23428	0.650119		1.14932	1.21324		-0.470532	-4.39123		0.643807	-1.18506		-0.386105	-5.31055		2.41836	2.53769		-0.112815	5.70153		6.28495	0.847559		1.4446	4.48494		0.690163	-9.72798		2.31972	1.05614		10.0633	21.0741
		#REF!	#REF!		4.29179	17.8242		3.69119	26.7207					3.36807	-0.0920601		1.35994	1.1331		-0.895193	-10.9934		0.450421	-3.64425		1.20467	0.245212		3.07631	14.9918		0.25331	4.1304		8.10334	-5.80547		0.787719	4.79979		2.66378	0.365637		1.66456	0.649682		11.0602	19.5694
		#REF!	#REF!		-1.06558	-3.41647		4.85138	18.7072					3.03902	-0.136311		0.901725	0.870025		-0.506265	-12.307		0.325626	-0.818329		0.057422	-9.2223		2.64566	10.8126		0.334381	-0.695863		7.41361	-3.51866		1.35722	6.26918		3.30433	3.47743		0.250053	-10.8921		13.4614	8.79645
		#REF!	#REF!		4.04613	-0.30972		3.88268	26.0332					3.37545	0.0849945		1.48142	1.5171		-0.0476989	-2.92857		-0.313334	-2.6825		1.85551	2.26347		2.2775	4.9404		0.302382	-1.62807		5.67462	1.64323		0.811833	6.30454		2.15243	-0.690038		1.00559	2.21859		12.1526	18.9277
		#REF!	#REF!		3.51392	10.0437		5.61807	27.7099					3.02092	-0.274342		1.19984	1.56215		0.58354	-1.88505		0.0625251	0.0297547		0.747414	-2.17982		1.17168	7.34745		-0.297106	-1.05247		1.24529	-12.7178		1.02389	4.88999		2.16297	6.12643		1.43628	3.67259		10.0786	22.2212
		#REF!	#REF!					4.21482	24.1974					2.58213	1.33858		0.599075	1.95283		0.250471	-5.33293		0.37599	1.07819		-0.645122	-7.0832		0.989275	11.5033		0.924664	3.5719		2.04054	-8.70811		1.17829	6.5828		2.18585	8.37532		0.799467	-3.69217		7.3502	25.9661
		#REF!	#REF!					4.82887	35.797					2.82465	1.79238		1.40062	2.0436		-2.14105	-18.4412		-0.038737	-3.81658		1.2578	4.63957		1.56021	3.5733		-0.440339	2.90065		0.632496	-7.54945		1.03945	3.89625		2.02053	-0.565352		1.39334	3.89541		13.25	19.9194
		#REF!	#REF!					4.30311	15.6257					3.31511	0.823572		1.0085	2.83144		0.432117	-3.31685		-0.470465	-2.72311		2.06852	2.10862		3.06324	38.8083		-0.384851	-3.80461		4.76205	1.00953		1.27612	5.55105		2.64408	0.275309		1.61904	2.21326		10.9833	12.4698
		#REF!	#REF!					4.38927	29.3212					3.24367	2.2209					0.744635	-3.74239		0.297611	0.962639		2.06322	6.37335		1.85082	0.0048913		-2.80092	4.12174		3.81466	-14.4635		1.18573	7.12424		3.24582	-0.942167		1.08895	2.97926		11.1474	26.3926
		#REF!	#REF!					5.00081	16.2105					4.0451	3.9518					-0.359219	-7.97093		0.251872	-2.2542					2.48954	7.73964		-1.54254	-8.52002					1.01903	3.85791		4.36325	2.66669		3.20392	7.09302		10.7361	14.1456
		#REF!	#REF!					5.52367	30.8314					3.19495	0.85353								-0.0372366	-1.34701					2.87528	4.83343		-1.4532	-3.50994					1.22276	6.0224		3.56948	3.35191		1.19742	0.785851		9.95973	23.2517
		#REF!	#REF!					5.06476	17.5205					3.90162	5.29681								-0.322602	-0.97565					2.67067	3.26438		-0.616247	0.299116					0.727024	5.94337		2.27508	6.82924		0.702281	-8.11851		12.7356	19.1923
		#REF!	#REF!					5.05431	16.5668					3.37072	3.60944														-0.208642	20.8741		-2.40064	-10.1007					1.28528	5.03205		2.13302	-0.0946199		0.748109	-7.16657		9.85153	15.2494
		#REF!	#REF!					4.31361	16.2562																				1.58805	1.75073		-2.2425	-12.415					0.896624	5.16483		5.24736	4.52854		-2.53385	-18.0806		5.73123	28.8605
		#REF!	#REF!					3.70032	17.153																				2.53248	15.647		-2.68974	0.779487					1.1119	8.31965		2.70104	1.13355		1.45521	-0.267634		11.4645	16.1704
		#REF!	#REF!					4.05505	14.9885																				1.98241	4.04064		-2.06	-0.0129032					1.20184	4.26103		2.23133	-11.1073		2.39163	1.32073		13.0651	5.72009
		#REF!	#REF!					4.37698	19.4269																				2.19933	16.4885								1.34403	4.4194		2.19706	-2.17685		-1.17942	-22.9266		8.6317	18.2568
		#REF!	#REF!					4.34012	18.8942																				2.0157	-0.12191								0.997198	6.43186		1.56688	1.16128		1.22047	-3.01459		11.0116	20.7256
		#REF!	#REF!					3.29293	14.7205																				0.846806	6.73714								1.25348	4.09844		2.94435	-0.899404		2.08296	-4.2477		13.9632	21.0156
		#REF!	#REF!					4.21295	18.4451																				1.86759	12.4198								1.3268	4.09293		2.00122	0.137349		2.30344	1.56265		12.2772	17.2289
		#REF!	#REF!					4.29025	20.9533																				2.5671	7.80713								1.3262	3.96491		1.24536	0.522706		1.1737	-4.89627		10.3613	30.8873
		#REF!	#REF!					4.40645	18.6033																				2.326	13.8458								1.26389	4.16426		1.73193	1.33231		1.66384	3.52483		9.58707	22.8538
		#REF!	#REF!					4.87417	20.1929																				1.67979	13.2312								1.34417	4.09509		1.53854	0.35471		2.2467	3.37967		10.6368	18.51
		#REF!	#REF!					6.0478	35.7153																				-1.72711	8.69003								1.36765	5.45848		2.49134	4.26328		1.69245	4.87745		11.5008	22.3562
		#REF!	#REF!					5.56631	30.4116																				2.3268	18.1489								1.26909	5.29701		1.90235	1.69578		2.77607	3.30418		14.5632	17.4365
		#REF!	#REF!					5.28312	23.7531																				2.75941	8.56989								1.38659	4.83483		2.65865	-2.20449					12.4202	20.4918
		#REF!	#REF!					4.22871	18.6911																				1.99597	10.2405								2.33683	11.8478		3.14641	-0.23437					13.1389	15.5986
		#REF!	#REF!					5.17689	31.5574																				1.73097	12.9722											2.72906	-0.815996					9.99665	15.7638
		#REF!	#REF!					5.73187	27.5927																				2.73173	16.2205											3.04227	-0.35443					10.0803	21.9258
		#REF!	#REF!					5.51858	18.4957																				1.91734	16.9116											3.75155	-4.53073					9.21744	12.0171
		#REF!	#REF!					4.97454	21.4677																				2.79558	11.741											4.3231	1.03511					14.856	19.163
		#REF!	#REF!					4.20152	19.0917																				2.59128	10.8817											1.61058	-4.43762					13.5895	25.1636
		#REF!	#REF!					4.33209	18.0181																				2.95097	13.9964											5.1501	6.21379					9.92156	18.7959
		#REF!	#REF!					3.92319	21.2142																				0.615145	28.2477											2.92371	1.07645					10.5286	21.749
		#REF!	#REF!					4.13363	19.412																				2.89099	12.4673											3.12688	4.82203					9.6346	23.5488
		#REF!	#REF!					4.44803	18.197																				1.54102	15.3232											3.04265	-0.76046					14.7239	15.8157
		#REF!	#REF!					4.26033	24.7118																				3.24267	16.2619											4.67109	-1.83477					11.7946	25.7077
		#REF!	#REF!					5.2014	21.1838																				3.75278	20.2451											3.07848	-0.613922
		#REF!	#REF!					5.35924	22.8541																																2.05917	4.75475
								5.30577	20.6606																																2.82333	1.559
								5.28434	21.1669																																2.71163	3.37238
								5.34156	27.6829																																2.93751	-7.64494
								5.48016	24.1255																																2.82704	0.619294
								5.7408	25.0917																																2.65986	-3.74794
								4.41044	22.2979																																3.40566	-1.0353
								5.67468	21.6906
								5.57345	22.0618
								4.89269	30.4923
								4.75388	20.5631
								5.39893	22.5125
								5.30261	20.9719
								5.4344	22.4834
								5.08892	27.8164
								5.29945	31.3208
								4.71565	26.0075
								5.07321	27.5036
								4.99787	32.4982
								5.57525	31.8827
								4.81467	26.5422
								5.85393	23.0185
								4.96577	28.0094
								4.24852	22.1623
								5.8436	23.7464
								6.80652	30.7198
								6.65819	31.1032
								5.8169	21.2572
								5.92538	29.9138
								6.7025	32.6182
								8.1212	41.32
								6.61173	32.3567
[truncated: 110 more columns]

## Sheet: Interphase mCherryGFP
	image 5 interphase			image 6 interphase			image 7 interphase			image 8 interphase			image 10 interphase			image 11 interphase			image 12 interphase			image 14 interphase			image 19 interphase			image 19 interphase			image 3 interphase 1			image 3 interphase 2			image 3 interphase 3			image 80 interphase			image 67 interphase 1			image 67 interphase 2			image 67 interphase 3
	mCherry	BLM		mCherry	BLM		mCherry	BLM		mCherry	BLM		mCherry	BLM		mCherry	BLM		mCherry	BLM		mCherry	BLM		mCherry	BLM		mCherry	BLM		mCherry	BLM		mCherry	BLM		mCherry	BLM		mCherry	BLM		mCherry	BLM		mCherry	BLM		mCherry
	3160.46	2966.06		252.8	395		2404.24	2624.85		362.611	4598.09		781.737	6490.96		745.111	1610.55		897.619	1956.94		1655.04	5813.15		835.367	2438.73		2640.13	4042.06		1859.41	2934.32		1303.14	4472.64		1031.45	1767.34		1953.57	4510.53		1188.87	2933.96		1025.22	3203.14		741.778
	2417.12	2259.03		282.3	306.1		1391.03	1420.33		499.326	7413.39		716.096	6328.86		591.399	1523.23		844.773	1898.67		1153.26	4948.47		2657.28	8292.57		2476.15	3134.64		1157.1	2088.28		1107.29	3752		1680.52	2513.39		2580.65	6539.16		1360.7	3260.73		1162.71	2966.06		1743.95
	4015.15	4408.32		500.3	927.6		1258.47	1334.2		790.157	9213.88		499.707	4301.95		607.633	1407.89		997.747	1720.56		968.326	3840.82		1307.29	3508.69		3458.31	4570.15		1133.34	2078.32		804.666	2324.72		796.937	1879.82		1736.85	4207.35		1522.46	3036.27		1106.56	2761.06		1034.56
	2536.24	2777.59		1132.6	3153.3		1011.52	1359.53		369.397	4203.34		645.105	4785.69		823.061	1917.9		918.339	2428.08		780.356	1993.23		2094.21	6192.4		2746.04	3622.1		1161.99	1444.85		654.027	1894.43		826.23	1298.48		708.626	2181.78		2301.86	4787.86		961.547	2345.97		963.372
	2746.88	3278.39		305.1	908.7		2093.02	2337.07		299.749	3274.39		572.254	4907.97		932.547	2221.54		657.693	2120.34		1305.8	4385.3		933.652	3183.99		1008.88	1727.36		2271.9	3869.3		1198.5	2851.19		1040.85	2246.59		1917.99	5804.57		1303.32	2850.69		1504.12	3818.64		2421.66
	2417.83	1825.16		787.7	1003.2		663.154	678.5		352.539	4142.52		678.824	5315.44		859.88	2025.7		714.952	2175.67		1312.61	4592.71		1857.92	5197		2697.64	3501.58		1316.36	1696.49		586.929	1587.71		1039.97	1980.67		892.64	1041.86		622.237	1537.49		1075.04	2403.16		898.982
	2309.86	2106.01		849.3	1643.1		1321.09	1665.26		309.649	3296.84		529.312	5435.58		844.413	2417.89		765.245	1462.06		1775.63	7148.48		1932.49	5417.35		1190.82	1605.93		2333.72	3346.11		1547.07	4335.77		1627.01	3680.26		831.776	1068.91		1255.65	3307.28		1109.63	2969.51		764.171
	4232.15	4366.04		1011.8	2482		1518.89	1602.24		788.805	8473.96		673.512	5099.06		603.277	1085.81		1211.2	2305.8		1117.92	3159.21		1698.36	4564.18		887.224	970.501		495.448	756.295		1099.13	3321.79		1745.27	4013.69		697.444	916.922		1024.03	2317.75		875.27	1493.69		808.688
	2402.73	2781.55		352.5	630.6		905.154	941.5		410.511	3790.27		414.759	2952.88		770.504	1993.63		1304	3835.52		1434.59	4766.49		1046.71	1960.79		1219.85	1492.12		1627.8	2081.78		1418.47	4980.55		1150.49	2478.04		1431.44	3778.19		1280.77	3227.63		1687.38	4025.98		658.141
	2414.9	2253.62		1183.5	2797		1041.06	1471.77		326.561	2525.74		464.12	3708.26		526.384	1704.35		1364.07	3532.71		958.954	3704.14		550.117	2144.76		2127.38	3013.9		2462.67	3448.84		1262.52	3273.11		859.125	1055.47		1274.37	3423.59		979.509	2172.64		1107.29	2892.45		798.28
	3768.69	3726.74		564.2	1284.6		1884.95	2803.62		289.659	2296.38		517.68	4078.27		676.382	1773.43		905.085	2789.11		925.964	3205.07		1655.99	5563.09		1085.64	1300.44		1826.87	3642.47		1719.3	5754.52		1531.22	2925.21		1221.9	4466.48		1483.11	3387.73		1210.41	2795.86		1636.64
	2081.7	1792.44		569	1219.1		2401.05	2954.17		349.594	5376.26		1202.42	9849.17		754.495	1707.58		950.986	2477.89		1622.2	5784.05		1659.62	3779.63		1693.58	1542.2		2163.27	3136.19		1474.57	5473.18		1044.43	1850.43		1348.36	4241.47		1203.08	2154.01		911.778	2609.35		974.841
	3841.29	4732.81		915.6	1927.4		1744.6	2573.31		809.372	10289.7		801.748	8137.32		1004	2471.07		2099.39	4819.25		874.76	3135.04		1007.58	2792.64		2813.06	3831.41		2036.68	4016.99		1227.04	3595.04		905.794	2201.04		1152.29	2454.83		1487.69	3276.42		1672.3	4667.57		973.344
	1390.63	1232.69		522.3	1344.8		1416.63	1927.23		278.42	2693.99		561.41	4720.35		633.706	1247.93		900.828	1574.75		1248.75	3555.61		1303.62	3714.59		2349.28	3057.42		1497.88	1829.9		1473.15	4049.88		2497.83	5397.66		1254.75	4430.22		1898.8	3914.49		1419.6	3787.62		1228.84
	4636.11	5261.92		552.1	1373.3		1471.63	1590.41		285.787	3847.47		431.98	3840.94		612.077	1277.64		684.896	1748.76		1357.58	5346.17		1011.36	2729.93		1487.49	2212.62		1980.41	3297.66		1429.86	5144.55		1428	3384.44		894.429	1985.41		1561.67	3261.32		794.22	2079.96		1055.76
	1929.13	2150.73		755.8	1669.5		2951.21	3905.53		328.795	2688.69		495.711	3905.11		702.751	2414.42		1629.62	4321.96		970.647	2862.77		1448	4807.84		1237.47	999.632		1896.11	3099.67		1568.35	5490.98		1020.95	1709.83		1179.58	2937		1255.76	2518.06		765.47	1631.59		735.95
	1537.17	1753.89		532	1286.1		2623.1	3071.2		520.223	5519.4		956.118	8290.76		543.883	1133.77		1988.82	4151.73		1337.4	4175.75		1203	3140.25		926.405	1480.89		1023.15	1660.18		1321.81	4645.16		634.645	1354.86		1793.03	4522.79		1958.23	4045.88		1254.13	2892.27		751.61
	1189.34	950.97		508.3	1609		1495.95	1869.89		267.137	2601.74		689.062	4807.51		898.848	1985.1		1002.59	2625.53		1349.29	4551.17		1523.45	3805.91		2246.6	3906.98		2877.52	4237.55		1269.95	3741.61		1040.07	1933.24		1402.3	3951.64		2004.36	3926.55		2453.28	6444.28		832.988
	1154.54	2282.16		979	2497.7		1442.25	1765.58		303.605	3250.73		499.114	3050.41		717.907	1525.77		953.943	1487.59		1249.03	4164.47		1173.01	3928.54		1195.09	1636.41		1692.36	2126.12		974.6	2982.49		1239.97	2724.45		527.824	523.496		1695.61	3902.52		2423.62	6083.61		1015.52
	1650.06	1552.01		657.4	1245.2		1435.95	2043.53		636.938	7601.34		1209.79	10054.3		709.238	2060.58		686.336	1132.96		1461.81	4782.76		2423.89	7426.79		1651.62	2634.98		2681.13	3962.05		954.113	2989.12		1141.2	2620.17		1374.79	3025.75		1430.84	2725.29		1160.14	2768.35		1124.65
	2321.08	2657.96		507.2	1051.7		1924.75	3168.3		750.882	10626.3		503.517	3437.52		621.904	1631		573.063	900.095		1341.68	4773.09		1098.06	3295.13		1159.56	1480.92		633.713	979.445		1034.71	3377.14		990.35	1722.66		3040.91	7691.31		1893.02	3979.01		1013.4	2852.16		648.928
	2071.9	1280.1		759.9	1545.4		1123.15	754.5		300.202	3269.39		481.638	3732.07		692.404	1651.06		1488.57	2628.33		953.89	2948.66		1094.71	3866.75		1662.85	2762.91		1333.09	2218.03		2587.25	8501.66		1994.69	4395.19		2379.34	6525.3		1996.29	3445.35		1150.11	2596.31		1114.13
	3856.43	3718.77		246.1	373		1910.65	2350		281.788	4230.69		783.033	7044.49		815.48	2090.19		1416.89	3730.66		826.459	2852.13		1153.82	4005.95		3094.83	4684.11		1987.91	3031.13		1374.05	3868.04		1223.2	1793.55		2725.91	9068.16		1151.37	3207.02		1010.65	2273.77		784.562
	1211.02	1391.85		559.8	1353.8		1060.15	1531.5		371.438	3737.89		491.523	3734.62		599.495	1113.18		790.19	1838.22		1258.56	3620.99		1337.84	4183.2		1395.54	1862.52		1946.3	2520.38		1153.14	3603.29		1093.18	2283.34		1096.64	2052.31		1493.9	3189.06		930.879	2161.9		1155.79
	1425.19	1938.18		428.5	1318.2		1044.15	822.5		303.382	3355.46		437.147	2951.28		732.884	1948.52		1590.6	4215.67		1125.09	3490.15		1785.34	4976.08		1757.68	2074.4		764.338	1129.71		704.256	1254.09		1094.15	1586.36		747.047	2154.12		1402.16	2884.62		896.47	1769.59		839.931
	2579.36	2325.88		726.7	1922.6		1017.15	1380.5		304.378	4097.36		478.111	3853.85		1079.61	2400.64		1092.52	2869.85		1065.43	3612.77		1768.41	4745.33		2215.99	2867.84		1457	2255.02		1269.12	3866.37		1098.72	2345.61		1289.18	3023.79		1631.17	2900.52		1648.02	5013.22		1217.37
	1759.39	2606.39		859.1	1956.6		1124.35	912.787		675.9	8213.96		868.483	7114.24		545.94	1110.91		879.927	1193.84		1253.84	4086.36		858.746	2882.46		1311.46	2163.83		1087.23	1356.34		1096.88	3413.23		1306.5	2519.44		1201.09	4198.62		1483.26	2761.86		1061.14	2470.25		664.386
	1692.38	2030.59		269.1	315.3		2421.67	2479.53		273.885	2760.38		482.741	4697.83		741.213	1345.54		772.696	1998.53		1417.77	4883.09		1537.05	4274.58		2187.4	3451.6		754.338	1395.71		712.159	2021.71		1207.75	2648.65		305.957	99.7129		997.494	1872.47		1023.35	2341.09		897.696
	-773.486	-463.377		270.4	267.5		1017.15	1198.5		221.083	1625		948.205	7871.93		459.869	1506.45		965.628	2899.23		1256.27	4228.21		771.867	1620.13		2466.44	4070.55		951.69	1467.79		1031.03	3029.33		935.661	1646.42		976.341	2700.85		1378.85	2680.26		1939.31	4808.95		762.979
	1917.05	2685.05		771.5	1203.7		1859.15	1932.5		375.326	4973.08		447.261	3734.25		744.651	1810.42		2097.63	4145.57		1699.22	5664.57		1399.12	4361.82		2171.33	2980.71		1553.2	2323.52		1252.58	3545.7		795.573	1974.07		1006.29	3596.61		1265.94	2958.67		2377.93	5110.83		860.827
	2998.09	3023.57		50.6	155		1033.4	1318.75		776.798	8531.84		758.381	5955.94		939.364	2321.21		1171.54	2681.45		2802.58	11071.7		1560.32	4110.36		1742.17	2165.43		829.338	1248.71		982.2	2300.38		1081.09	1573.68		237.955	-206.904		962.729	1835.72		1475.87	3577.85		785.848
				368	681.1		987.154	1170.5		379.624	4231.82		499.559	3729.17		736.624	1802.54		591.663	1343.23		1257.21	4252.84		1311.79	3015.57		2014.34	2334.52		2065.32	3821.02		834.063	2859.91		1491.23	3195.93		599.4	1143.48		2164.81	4398.91		1024.86	3110.8		930.335
				516.2	1285.1		1857.15	1892.5		704.762	7566.41		556.439	3776.08		479.757	1180.15		1106.05	2275.97					1313.09	4416.43		1137.01	1538.82		751.338	854.713		1473.51	3916.81		1397.05	2754.64		312.174	1594.05		942.003	2529.42		1454.36	3961.81		901.239
				494.7	1422.4		1413.34	1728.18		256.928	2558.93		579.022	4905.53		705.861	1215.49		1073.91	2532.76					951.387	2891.57		256.203	-75.0896		1571.82	2238.49		1301.77	4076.41		1654.86	3688.22		655.776	3159.87		1608.11	3269.7		1126.04	1965.59		802.942
				525	1402.1		944.283	686.517		1182.85	15064.3		521.833	4709.5		763.051	2071.37		1263.16	2348.28					840.867	1229.48		1624.25	1957.82		1969.85	2778.58		1433.29	4591.11		773.45	1088.29		483.742	228.394		1105.93	2330.32		1089.12	3027.64		716.045
				81	-16.9		1684.82	2165.48		709.285	6987.54		667.79	8108.28		721.598	1669.04		1166.84	2666.45					1165.65	3378.26		1575.43	2134.6		1488.13	2127.91		1110.04	3667.61		1526.05	3199.55		414.401	-39.0063		1349.94	3220.38		1377.7	3410.03		712.959
				410	651.1		2522.96	2262.15		247.137	1416.4		396.085	2569.13		513.011	1293.75		614.73	1847.93					1346.94	4021.08		1258.13	2190.06		2052.64	2560.28		1026.65	2939.75		1549.33	2882.77		223.308	-28.2625		1359.32	2997.16		1203.07	3234.35		605.131
				852.8	2159.7		844.495	938.996		547.859	6280.91		818.749	6442.49		604.011	1107.04		864.545	2244.71					1203.03	4150.97		832.564	1477.06		1720.05	2480.21		1134.24	3756.31		1746.19	3313.59					1077.91	2824.2		1558.54	4461.03		583.631
				807.1	1600		3192.26	3836.57		218.334	2852.55		616.472	5092.49		730.864	1550.34		1190.22	2165.17					1154.87	3718.13		1056.52	2430.58		3580.88	6043.75		1086.64	2235.27		762.129	1627.84					814.736	1846.75		1512.59	3785.74		685.279
				658.7	1448.7		2239.15	3009.5		581.553	5019.79		512.068	5287.72		686.711	1967.98		1045.77	1564.21					1548.75	4360.1		1617.53	2598.87		1409.83	1473.31		883.259	3284.77		1074.12	2239.15					1200.35	2310.01		1116.68	2921.85		517.904
				299.4	603.5		2342.12	2335.56		576.301	6345.97		511.594	3555.42		708.204	1982.74		1591.78	3759.53					1180.81	2852.75		1148.01	836.372		682.458	767.862		1056.16	2800.18		724.95	1446.99					486.381	601.459		943.47	2083.59		650.231
				530.7	449.4		2317.15	2904.5		698.057	9747.1		783.136	6127.95		638.923	1538.91		1304.58	2871.57					1883.85	5705.07		1138.27	1042.93		1200.61	1615.45		808.819	1647.44		1179.35	2638.1					748.187	1202.33		1694.76	3349.29		584.431
				447.1	835		2250.15	2985.5		666.861	8187.19		366.971	3289.18		524.31	1148		1428.38	2493.5					1495.14	4264.2		1020.88	1280.22		2412.32	3367.27		954.765	2592.03		1254.56	3009.15					616.957	1277.09		3477.72	8380.01		496.481
				842	2161.5		2248.15	2981.5		633.549	6564.38		439.349	3441.31		604.11	1848.49		698.813	1120.86					1889.93	5514.19		1187.25	1868.65		982.338	835.713		1026.8	3504.11		672.129	1425.41					1061.59	1800.89		914.733	2459.37		646.026
				586.2	1363.5		2514.79	3178.4		387.163	3711.76		443.665	4961.32					2011.16	4798.41					942.367	2099.46					1075.15	1430.37					1961.14	4080.27					806.305	1746.24		1556.93	3215.29		563.464
				543.7	913.3		2241.15	3012.5		1170.75	12453		554.025	4157.02					1236.67	3578.42					1325.31	4024.11					1843.1	3451.74											637.572	1860.56		1895.88	5121.12		484.949
				172.6	-298.1		1009.13	1380.14		611.057	7027.65		602.086	4650.49					1221.84	2756.14					1129.29	3257.46					2035.33	2873.1											910.89	1476.04		1406.2	3403.89		495.231
				362	842.3		2728.29	3462.46		293.923	4280.47		547.588	3660.53					1258.12	2959.97					2503.44	6569.77					402.935	171.414											743.786	1732.26		1905.07	5100.79		1455.8
				595.2	1642.4		2344.78	3251.25		237.793	2953.43		1044.3	8117.05											677.427	2433.97					816.876	963.125											950.134	1780.83		2959.27	7756.63		480.256
				347.6	693.8		481.154	1124.38		598.054	7857.77		739.006	9210.39											1465.74	3818.47					1792.11	2865.33											719.09	2105.57		1387	2606.09
				391.4	677.5					579.489	5792.95		573.255	3518.03											1589.88	4890.5					1402.87	2094.88											711.99	2029.02		1596.8	3909.47
				558.4	1525.4					684.613	6901.11		814.944	5800.01											2215.8	7056					303.338	-125.287											293.914	634.877		1453.47	3465.59
				725.9	1391.8					765.522	7056.15		580.339	4404.45											1783.87	5046.13					248.338	78.7128											523.662	1763.81		1394.51	2924.84
				1127.6	3152.3					513.299	7625.58		391.119	3801.16											745.152	1885.23																	2098.42	4205.19		1331.31	3330.01
				837.5	2170.2					674.697	9168.8		620.544	5066.09											763.174	2696.63																	273.49	815.924		1374.76	4115.22
				1001.4	2955.1					693.223	6877.86		844.87	8320.86																																1155.71	3716.9
				224.5	138.1					526.687	5545.26		1048.6	8946.75																																1590.67	4152.36
				863.2	2495.5					730.283	7035.98		702.168	4035.18
				442.5	681.9					612.107	9012.6		611.684	4854.12
				1030.6	3341.9					508.583	5998.55		1011.99	7112.42
				144	540.4								872.114	6970.46
													504.479	3704.58
[truncated: 5 more columns]

## Sheet: Prometaphase mCherryGFP
image 5 prometa			image 8 prometaphase			image 11 prometaphase			image 12 prometaphase			image 14 prometaphase			image 15 prometaphase			image 19 prometaphase			image 24 prometaphase			image 27 prometaphase
mCherry	BLM		mCherry	BLM		mCherry	BLM		mCherry	BLM		mCherry	BLM		mCherry	BLM		mCherry	BLM		mCherry	BLM		mCherry	BLM
243.3	-213.2		748.711	589.297		376.467	965.521		1344.48	2307.2		354.438	835.375		1470.22	1759.19		1258.71	1729.27		1084.31	1044.08		622.999	357.486
847.7	610.3		1003.26	993.195		616.898	1765.92		671.025	1132.37		511.878	961.827		1058.57	1102.46		1064.88	1250.15		1399.14	1576.26		441.741	815.563
208.1	-172		1022.72	1382.74		301.506	770.902		858.993	1865.15		566.131	2088.69		544.336	680.189		1721.72	1658.91		1311.6	1770.83		522.879	638.378
669.9	510.3		905.502	1343.27		223.885	676.917		563.584	814.776		280.88	780.693		1701.9	1610.38		1404.44	1426.41		1766.83	2034.81		454.417	613.416
706.8	359		960.871	1234.48		447.297	1251.12		630.815	1497.7		508.23	1864.75		1094.51	1480.68		972.107	1050.04		744.39	884.511		723.758	731.397
-109.8	-105.3		513.213	1160.36		453.858	780.822		814.202	2030.22		342.792	817.052		1706.45	902.938		1569.54	929.898		1807.97	1670.53		761.417	224.416
28	-294.6		1163.55	1278.63		319.451	809.135		1393.2	2043.02		239.386	987.245		1454.61	1916.91		1447.94	1592.91		1364.68	1800.27		320.641	435.655
725.5	385.1		600.377	966.351		740.631	2192.04		1546.17	1561.56		225.75	55.5316		1102.5	1689.08		1793.16	1746.27		1049.77	1287.45		1023.11	452.868
383.9	105.4		852.53	570.711		326.632	363.036		684.979	1272.24		220.567	-181.989		1507.37	1544.71		1490.36	1162.18		518.152	778.19		357.908	557.624
844.8	317		626.687	606.29		343.004	727.741		854.14	1279.36		458.008	1553.7		3021.52	2118.57		487.279	206.455		1003.66	1605.76		536.26	668.899
1118.3	578.9		731.226	1103.66		544.861	1368.17		1640.25	2953.89		411.779	822.833		574.625	527.954		800.442	262.408		894.186	1085.9		1039.45	1178.17
463.2	274.4		499.158	902.627		393.43	1371.24		687.685	888.505		508.504	1411.42		826.826	1073.52		1560.1	1271.94		834.987	769.209		1045.49	1348.05
756.7	511.8		564.236	761.134		237.066	308.961		829.719	1181.02		461.694	1666.79		563.442	1217.22		2033.36	1387.09		840.394	786.146		521.417	420.416
876.9	175.6		1216.13	1265.34		323.089	134.339		979.764	1342.38		474.856	423.922		579.737	867.849		957.505	496.768		810.363	1132.99		673.215	1177.19
622.5	119.8		451.323	992.998		434.317	928.253		1586.65	2499.95		309.486	1076.89		635.094	81.6502		379.442	-23.5919		813.235	1334.04		452.606	938.443
431.3	232.7		551.854	230.571		340.84	667.438		912.021	1331.52		243.755	1091.15		1769.61	2249.43		1071.95	580.625		888.913	1547.26		840.553	1368.4
591	148.9		485.303	688.213		137.202	-26.9459		1138.09	2429.1		254.895	1003.54		858.88	1019.96		683.216	224.135		1073.59	935.289		448.83	376.916
595.6	-234.7		759.616	1126.89		209.485	733.945		2902.72	4863.68		380.69	1378.3		820.68	1045.37		1719.34	911.474		557.349	801.397		1210.03	709.197
357.7	-613.1		630.646	436.135		365.825	604.037		2773.46	4566.15		358.289	1694.15		749.124	277.903		1216.17	537.846		474.725	780.462		688.959	966.838
430.1	-95.2		582.788	549.523		644.222	1405.17		1571.09	2552.39		221.066	813.976		615.451	495.816		1761.47	1297.39		1036.42	1163.13		845.259	1822.38
521.6	174		519.311	832.502		170.289	460.51		1957.96	2457.19		256.89	849.3		611.492	441.058		1193.51	1138.6		550.877	937.627		432.501	166.583
934.5	-47.2		503.297	491		430.249	772.2		1314.04	1554.93		291.633	1612.77		725.638	512.485		1332.27	1078.46		1216.39	1089.25		485.616	478.738
844.9	120.8		927.471	1372.8		309.932	315.006		1754.72	2387.01		173.643	642.876		1371.66	843.839		2576.93	1777.34		467.925	1188.15		710.417	290.416
417.4	-196.4		681.261	240.879		438.065	1326.06		1369.79	3286.22		264.67	866.729		737.147	1209.18		596.216	290.993		674.108	392.533		842.261	1386.71
380.7	-340.8		988.024	967.769		240.763	342.923		497.342	725.478		398.199	586.573		1013.6	1293.7		1146.58	716.29		1086.83	724.262		659.557	778.858
590.6	-299		600.981	863.335		741.132	2018.23		1160.75	2594.78		355.236	2157.5		497.576	141.982		1213.91	837.939		845.616	941.5		1015.92	827.255
834.4	-39.8		466.68	613.624		405.193	836.618		1356.72	2446.66		325.494	1136.55		398.826	-58.359		1065.78	562.408		718.485	1563.77		958.238	761.408
805.6	470.1		669.825	1185.77		340.94	643.368		1263.57	2225.01		249.344	886.283		501.326	306.841		1704.61	1173.4		508.248	488.043		725.135	998.326
902.3	226		459.31	480.664		620.536	1845.46		1229.94	2221.86		216.268	1874.5		333.135	-130.727		1786.58	765.727		755.474	1037.29		822.587	1119
221.2	-473.6		768.634	705.759		341.918	654.263		1848.35	2532.7		315.522	1257.42		564.29	734.677		1394.29	1027.51		744.828	1338.67		580.252	1095.87
1156.4	499.7		723.156	364.615		169.592	575.171		644.652	1204.67					202.298	155.613		1115.98	653.953		1017.41	1263.01		851.417	843.416
890.1	662.8					166.044	303.238		1831.54	3069.81					1058.41	2029.56		1914.68	906.241		566.48	408.135		833.821	1077.82
922	-331.2					268.279	873.42		1466.93	2716.15					309.876	642.391		1534.96	952.413		551.844	756.181		804.642	1548.41
						310.53	690.409		813.687	1700.97					272.576	747.141		1331.05	789.223		544.632	468.793		672.822	767.029
						464.357	1579.61		1187.87	2207.08								1413.94	1012.97					877.467	987.241
						462.562	1081.92		1158.56	1516.95								1275.85	110.503					534.636	1072.69
						336.472	473.32		1932.33	3077.47								410.29	157.408					488.379	458.954
						398.463	1629.69		485.093	-167.437								865.681	1367.84					976.417	1014.42
						347.78	642.962		1622.59	1684.46														1363.89	1856.59
						400.989	939.481		1219.02	1456.49														537.88	735.305
						372.131	1083.38		716.524	1324.23														821.428	1291.07
						471.712	1347.24		1218.83	1622.46														444.417	509.416
						379.537	735.984		768.886	1051.14														840.924	919.532
						323.081	682.165		1318	2148.52														805.562	996.789
									1224.91	1513.28														702.483	561.702
									1162.21	1145														509.319	695.557
																								413.417	755.416
																								639.756	194.271

## Sheet: Metaphase mCherryGFP
Image 16 metaphase			image 2 metaphase			image 5 metaphase			image 5 metaphase			image 6 metaphase			image 7 metaphase			image 10 metaphase			image 12 metaphase			image 13 metaphase			image 14 metaphase			image 15 metaphase			image 18 metaphase			image 80 metaphase			image 80 metaphase 2
mCherry	BLM		mCherry	BLM		mCherry	BLM		mCherry	BLM		mCherry	BLM		mCherry	BLM		mCherry	BLM		mCherry	BLM		mCherry	BLM		mCherry	BLM		mCherry	BLM		mCherry	BLM		mCherry	BLM		mCherry	BLM
631.8	134.2		612.321	851.408		1017.8	521.8		538.5	1333.8		215.5	439.7		302.656	98.8185		506.951	1435.75		292.935	-32.8013		1337.2	869.688		824.385	913.968		1201.01	551.358		2150.83	910.17		253.48	504.028		303.374	711.727
54	598.7		381.438	241.37		419.9	196.6		571	1760.8		750.3	-263.4		591.492	727.043		803.016	1847.94		1069.47	368.584		1321.88	1486.86		419.667	1145.29		1351.54	877.914		1075.26	76.5427		829.869	635.616		482.349	662.851
335	331		393.036	605.635		719.6	227.8		1530.2	2148.8		513.9	-56.3		472.239	208.057		857.268	2507.53		438.492	-125.764		1474.23	1168.29		735.478	1052.13		583.163	205.776		1698.43	516.343		1414.91	561.297		595.354	622.571
1070.2	644.9		543.371	1019.24		1439.3	1032.1		538.3	1427.4		736.7	707		399.579	513.951		414.948	876.814		861.197	691.918		847.231	714.055		740.603	812.884		1216.49	955.299		563.392	203.052		618.026	667.171		1586.64	1191.73
1142.8	1221.2		430.853	598.694		1449.1	930.6		1438	2129.2		414.6	422.4		1449.47	2881.2		511.464	894.787		300.54	195.187		-51.0218	-527.409		748.603	776.884		1152.94	719.87		1470.17	672.544		1056.48	495.372		776.614	821.699
2055.8	1463.8		810.088	1733		1654	490.4		654.6	1024.5		556	591.8		320.007	828.534		672.849	1671.43		799.11	476.736		926.065	800.324		943.983	881.76		1667.71	818.414		130.82	260.836		1037.91	194.618		860.228	658.981
1062.5	185.3		318.346	151.431		1128.7	237.4		392.1	1058.4		1054.3	881.4		824.506	1204.75		538.328	1121.31		119.548	153.883		1195.4	1508.95		640.269	498.884		1500.02	850.495		2852.34	1287.75		860.82	728.935		739.334	974.182
769.6	715.6		396.289	169.747		1581	355		1484.1	1803.1		296	-1238.4		525.241	908.333		174.383	582.216		1144.06	429.479		1124.7	939.461		686.603	254.884		443.251	351.755		344.773	774.043		127.885	-102.232		454.221	769.86
805.1	758		211.091	776.283		1421.3	290.1		1474	1607.3		970.8	1065.3		409.007	1246.01		409.102	1316.96		1413.78	4.10041		1010.25	995.825		1110.27	502.601		1754.98	785.219		921.04	410.892		955.909	460.899		849.994	715.18
405.5	1155.4		284.664	293.97		763.6	-54.4		620.3	1265.3		466.8	262.1		988.007	2522.01		508.879	624.499		367.639	323.214		914.34	752.142		1254.82	1112.61		941.872	438.926		939.686	543.96		1684.74	910.774		769.689	535.202
723.1	1076.6		218.485	566.47		1024.1	429.3		1514.3	2055.9		357.7	-1185		804.105	1407.7		313.382	1007.25		699.209	229.475		1474.68	288.122		1098.14	851.389		550.912	659.535		757.064	193.962		1374.96	724.258		490.118	775.698
1303.3	1415.4		297.697	761.781		878	535.8		748	1035.7		426.8	-685.4		1022.01	2117.01		338.03	977.67		1193.18	728.329		1186.72	1663.93		1112.6	620.884		958.582	271.848		2085.21	686.298		513.485	159.784		452.351	104.816
1266.9	906.4		611.459	713.654		2338.9	1262.1		953.5	2382.6		601.6	333.6		480.007	-98.9923		191.468	171.114		74.3154	-430.141		1073.3	379.648		759.778	45.1993		898.383	21.2298		1064.47	371.865		603.032	101.286		635.334	491.621
552.5	243.8		492.249	1355.14		438.5	-490.7		1869.3	2356.9		476.8	-624.4		378.288	292.604		396.71	785.756		950.102	615.332		893.787	839.61		1112.6	1202.88		1340.96	886.116		716.561	123.278		1208.85	627.027		724.517	350.841
947.7	1336.7		330.114	201.544		2070.6	938.5		395	1192.7		282.6	-115.2		329.007	166.008		394.189	1684.84		958.896	283.813		1472.01	2084.9		545.603	-424.116		1104.41	751.025		341.439	-330.817		1592.71	579.92		1010.89	445.135
2851.7	2013.9		157.272	11.1142		407.6	-1013		501.9	1472		759.9	298		583.8	319.683		361.645	832.17		1950.65	599.027		1105.79	1301.63		517.603	-464.116		1064.14	285.998		129.241	45.2791		644.138	135.449		876.4	53.5393
1156.8	925.8		176.206	505.281		2813.5	1010.2		656.9	1195.4		1031.7	1037		489.507	538.508		239.737	264.896		1455.78	598.075		811.776	918.7		829.473	127.295		1039.59	296.349		1743.94	740.435		1352.59	416.818		960.027	735.949
2646.9	1984.3		216.476	421.01		2074.3	604.2		1657	2045.1		292.9	-81.4		308.285	212.883		462.5	1152.6		1960.2	622.527		1112.01	953.822		558.603	-163.116		986.351	-80.1891		87.7949	-1.26215		1751.53	1166.17		837.313	459.409
1701.6	1136		139.064	-512.861		1244.5	472.4		1054.2	1750		482.1	-351.3		616.007	246.008		361.974	660.759		769.211	-195.048		759.681	810.473		573.603	-361.116		623.118	19.8109		1476.14	1228.52		1147.59	281.818		939.35	456.431
424.1	1056.8		160.937	82.4261		2212.6	959		432.7	1123.7		767.5	683.2		448.007	473.008		154.972	370.462		913.185	743.799		515.092	1359.97		771.108	303.988		1245.02	829.311					440.381	799.484		739.721	112.86
-168.3	-332.3					2062	967.4		1650.6	2261.1		677.3	-133.8		640.007	796.008		206.963	120.181		1042.94	512.312		1201.22	286.141		805.603	665.884								1347.92	495.484		1345.32	193.866
1000.1	1643.9					1565.4	182.6		409.7	256.6		175.2	-110.3		768.346	1131.12		185.96	-84.7972		1644.78	883.803		609.974	496.253		687.603	701.884								1046.59	329.818		1008.53	947.402
19.8	587.3					1271.7	-499.8		671.4	920.5		341.2	-51.8		539.874	1017.01		259.913	1447.77		310.115	-133.29		483.825	1094.93		990.713	229.404								475.056	579.671		939.221	310.86
551.4	807.3					1286.1	828		526.8	-203.4		365.2	-41.2		735.007	1705.01		185.018	-265.741		806.348	487.696		505.192	605.312		775.603	-53.1158								858.07	272.09		821.923	69.1391
-174.1	-747.2					557.7	251.2		1117.4	1346.1		400.3	101.4		776.363	1292.3		429.73	133.014		837.749	528.592		1409.13	238.579		704.603	465.884								168.685	477.718		623.585	456.025
208.9	-222.6					1548.4	504.2		419.7	24.1		763.8	255.4		402.53	100.654		232.939	590.305		414.784	583.976					776.603	-27.1158								220.978	1128.1		785.221	672.86
-60.7	-245.6					576.7	-180.7		838.8	1556.4		785.1	237.4		358.007	360.008		317.77	1678.44								802.897	175.472								170.004	315.302		944.034	469.267
-309	-1085.8					994.8	62.2		551.1	411.9		480.3	-142.7		443.298	636.699		212.355	-171.534								666.122	500.917								116.585	1142.32		775.916	-177.271
						580.6	218.3		570.9	-368.3		305.3	282.3		333.084	266.29		215.823	1282.86																				1017.05	129.031
						1159.1	-44.9		445.3	560.1		400.6	-176.4		361.007	503.008		323.576	632.451																				1265.74	341.484
						623	-293.1		915.1	1892.9		489.8	-188.5		769.371	1245.64		184.475	838.019																				1456.13	883.756
						1017.1	302.7		485.6	1001.9		218.5	-612		282.973	308.143		268.038	-833.731																				444.88	690.973
						774.6	195.1					239.8	-369.9		474.48	1520.19		483.278	542.966																				435.044	781.881
						631.1	-23.5					276.7	-402.1		752.579	901.151																							390.584	200.254
						611.9	-197.4					294.2	-181.3		571.007	401.008																							463.571	403.61
												187.7	-450.6		580.407	434.208
												240	-538.2		206.007	-521.992
												156	-419.6		268.007	390.008
												155	-319.3		336.834	805.585
															229.132	-270.242
															254.007	310.008
															241.007	502.008
															491.007	1131.01
															321.924	377.841
															473.007	787.008
															494.507	1111.01
															504.007	853.008
															231.607	642.958

## Sheet: Anaphase mCherryGFP
image 16 anaphase			image 2 anaphase			image 6 anaphase			image 7 anaphase			image 8 anaphase			image 10 anaphase			image 11 anaphase			image 15 anaphase			image 19 anaphase			image 21 anaphase			image 22 anaphase			image 28 anaphase			image 28 anaphase
mCherry	BLM		mCherry	BLM		mCherry	BLM		mCherry	BLM		mCherry	BLM		mCherry	BLM		mCherry	BLM		mCherry	BLM		mCherry	BLM		mCherry	BLM		mCherry	BLM		mCherry	BLM		mCherry	BLM
428.195	2803.75		711.76	2903.48		889.7	4793.8		706.567	2089.55		1215.43	1525.17		253.443	354.733		219.857	771.541		1810.68	3011.24		690.31	1324		2490.37	1639.7		792.064	1670.65		1172.62	2249.89		1718.16	948.042
428.195	2122.55		790.849	2695.69		313	-794.2		278.941	707.929		1287.95	2024.36		494.226	1282.69		111.401	134.064		1776.94	2725.1		641.71	183.949		2687.17	1786.55		924.548	2887.3		1657.45	3889.29		1243.41	511.853
403.195	2547.55		877.32	2142.91		637.1	3270.6		280.845	563.527		1694.56	2101.06		277.663	512.356		137.85	555.601		1529.17	2359.31		1175.79	2594.58		1477.44	732.505		647.119	836.651		1434.02	2752.76		2651.21	1384.09
787.495	3230.35		1492.19	3805.75		857.4	4423		218.941	373.656		1085.77	1225.98		503.206	1090.4		136.168	382.533		1668.16	2961.81		644.41	1241.52		967.138	931.364		1217.55	5479.74		1167.51	3013.12		983.448	724.087
434.995	1875.15		932.265	3478.25		454.4	2702		926.869	3669.78		1101.14	1630.41		324.88	562.567		83.4474	442.109		1201.84	1881.87		944.339	2702.72		2221.72	766.729		419.003	1277.32		1189.24	1448.37		476.152	162.394
693.195	3100.55		776.605	3199.12		311.8	1561.9		580.418	2394.8		1231.54	1394.17		479.15	1515.21		161.737	1222.97		1347.86	1631.82		1090.7	2248.23		1207.04	448.41		671.286	3263.86		1096.29	2041.24		1049.85	456.711
577.195	2836.55		713.178	2286.52		783.1	3480.6		275.941	-190.344		1017.77	1318.37		389.396	899.551		194.24	452.843		1287.35	1647.61		777.27	2419.87		1361.46	1422.14		775.462	1578.26		1468.02	2447.76		1021.19	1221.46
306.095	1574.95		709.425	2749.13		178.6	1154.7		570.576	2234.7		1015.5	1500.71		302.194	796.987		174.065	505.518		1671.92	2652.73		1970.74	3536.1		1041.5	602.364		375.562	1488.87		1471.52	2723.26		1052.19	1231.96
515.195	2293.55		955.059	3203.15		903.1	5188.9		1122.67	3526.91		714.086	1031.52		307.319	709		129.513	302.611		841.458	1641.97		1142.42	2705.34		2582.17	1836.39		672.306	2209.95		1178.27	1910.8		1317.43	778.476
630.895	2583.95		914.214	3237.27		221.7	138.9		1036.22	2722.34		1036.97	1381.18		230.019	541.51		185.642	362.739		1034.02	1643.3		1384.9	2738.72		1752.66	1166.57		879.288	1568.59		1709.48	2404.59		21.2768	365.694
344.195	1670.55		676.653	1561.41		429.7	-879		1124.8	2791.14		1213.35	1591.49		339.284	847.002		149.678	129.702		1332.33	1680.34		990.012	1275.41		2366.63	1343.54		251.644	486.791		1518.02	2637.76		5.19247	316.959
725.995	2771.35		700.653	1938.41		274.1	1744.9		819.634	2533.66		648.755	746.138		273.761	678.428		117.306	524.221		706.252	990.559		1623.96	3464.4		1401.52	477.383		803.749	1639.02		1482.02	2392.76		-27.8075	433.959
601.295	3119.65		675.653	1879.41		463	1226.3		750.227	2091.59		1637.47	2415.3		285.802	549.633		111.85	75.6009		1343.9	1896.03		608.077	1311.15		1805.98	1012.37		554.388	992.378		1564.87	2863.39		1056.76	592.072
360.695	1861.55		841.826	3171.32		343.2	1582.1		572.941	4214.66		1527.18	1679.94		142.445	142.286		127.046	-133.372		1128.08	1527.44		913.044	1076.88		646.243	158.831		647.973	1775.39		1127.49	1529.82		1446.09	762.367
309.395	1833.95		749.561	3215.06		514.7	2411.7		677.025	2812.86		684.311	854.237		295.716	749.74		104.509	0.222136		1317.9	1418.91		1280.23	2123.44		1160.66	676.159		517.545	1097.19		1174.09	2024.31		2675.12	1317.94
746.695	2525.55		633.653	1763.41		260.9	830.8		1300.77	4534.7		1162.02	1188.62		493.968	1252.1		144.716	318.595		1432.09	2877.27		1284.13	2955.06		1470.38	1036.2		676.903	975.472		887.392	853.283		1464.12	547.397
692.195	3052.55		625.415	2388.86		259.7	-18.7		1406.99	4021.8		733.144	1205.74		267.999	452.611		168.384	486.643		1055.83	1514.85		2165.04	4583.6		1258.92	705.42		329.685	189.507		1302.41	2068.63		2165.98	487.161
723.195	3102.55		547.653	2645.41		849.6	5489.1		1016.82	4096.87		1340.93	1788.35		96.3468	173.731		120.245	286.897		1080.61	1606.7		1954.32	3418.79		2232.67	2023.22		588.154	2039.36		1320.11	2106.54		973.504	159.953
700.195	3243.55		952.356	2952.38		436.3	1440.4		1340.21	4340.25		947.66	1284.44		266.853	-37.7037					636.697	1281.03		1308.04	3270		779.9	-81.5399		460.408	367.083		1025.02	1275.76		1833.06	616.437
698.195	3074.05		544.653	1777.41		392.1	3045.5		838.441	3043.32		860.227	1153.81		167.96	207.025					1429.38	2483.81		1768.75	4088.69		1030.43	587.716		416.578	379.716		1296.39	1434.32		1632.87	841.153
677.195	3096.55		625.903	2221.16		776.4	4020.5		714.54	1981.53		937.952	1258.12		433.131	654.741					1388.31	3010.88		666.547	1317.6		1218.45	179.775		396.972	1338.23		1695.22	1342.16		1290.29	415.438
676.195	2834.55		631.142	2423.72		389	1057.5		344.691	107.281		1188.59	1481.13		78.9479	-267.659					1458.07	2810.87		389.577	890.149		885.136	176.999		638.847	2616.17		1127.69	1345.59		751.192	-315.041
677.195	3245.55		775.653	2364.41		186	1080		1178.44	4127.66		1162.76	2018.74		114.3	39.4626					913.244	1242.42		748.11	952.299		1306.78	1071.22		474.245	1518.82		1021.56	2143.68		991.192	-3.04061
456.695	2437.55		830.236	2685.22		837.7	5264.9		482.981	333.336		622.544	884.011		476.017	1002.72					1087.79	2105.4		766.973	1960.87		851.193	-417.658		360.937	176.849		1753.29	3752.55		984.885	778.421
360.195	1329.55		704.903	2374.16		230.3	1866.2		1575.14	4195.83		1724.24	2028.69		131.598	-202.259					1382.76	1932.03		1342.69	2877.03		1024.9	641.633		361.803	1244.82		864.687	855.289		523.438	651.535
802.195	3891.75		690.653	2098.91		332.2	2462.8		692.84	2289.37		1784.82	1428.1		424.352	1017.44					991.49	1040.48		758.91	1412.15		750.8	175.685		338.86	1122.2		1639.02	1768.76		1161.55	1010.62
420.495	1632.65		733.653	2476.41		716.7	4067		1799.82	3873.98		1280.52	1935.59		149.387	86.6148					947.532	1772.91		807.644	1944.27		947.113	-347.952		367.059	1346.03		1645.52	1892.76		315.642	-1.70727
338.595	1902.25		738.653	2231.41		392.6	488.9		590.027	1276.21		1077.84	1288.46		231.348	507.191					1525.73	1983.32		1341.6	2448.46		1020.26	146.628		331.234	163.031		937.928	1375.06		668.192	230.836
562.195	2369.55		855.653	2209.41		222	453		509.941	1114.66		1174.87	1249.53		423.37	517.33					939.357	1585.43		1095.01	2329.48		605.204	-478.053		303.231	1117.51		2043.85	2509.02		227.692	-22.0406
312.195	1507.55		959.001	2708.84		441.9	279.5		475.941	961.656		652.337	977.858											581.22	650.816		1300.74	321.408		334.408	583.487		809.636	1202.02		435.192	616.959
793.995	3416.65		936.82	3105.66		535.4	2549.6		1608.11	4251.96		790.291	904.296											1270.94	2689.54		720.589	-94.361		644.556	3205.13		849.512	614.007		877.141	466.821
364.195	1598.55		1093.37	3546.52		364.2	1389.3		1208.08	3921.23		763.077	776.276											640.752	1022.52		645.687	239.394		605.337	985.36		1041.23	1736.28		858.682	482.738
710.195	3551.55		708.499	2865.95					616.461	2689.77		1458.57	1752.9											501.91	483.149		723.323	-156.515		537.837	1825.42		947.187	1008.59		1216.45	540.152
358.195	1978.55		807.653	2580.41					508.941	1816.66		814.499	1160.36											494.125	415.292		703.323	271.212		406.614	1771.19		1214.8	3556.78		680.614	260.591
719.195	3642.55		790.82	3085.48					489.941	1114.66		689.025	912.243											673.369	817.358		580.959	-382.333		353.321	1277.55		1057.14	2743.35		590.935	627.428
710.195	3589.55		959.588	3234.5					486.941	1038.66		1254.14	1417.09											1086.91	2215.15		475.05	-779.515		415.231	1194.64		1541.71	2888.89		700.467	224.245
767.095	3308.95								709.584	3723.44		1403.02	1642.41											1232.04	2193.09		609.25	-122.915		344.594	651.734		934.58	2369.56		488.192	230.959
708.195	2620.55								1167.94	3154.66		659.54	1136.19											1084.91	1917.15		555.75	-404.815		358.603	-76.284		1603.49	1968.88		1805.44	737.114
782.395	3172.65								465.465	1038.61		1425.79	1582.75											504.41	65.1493		516.939	277.374		331.075	591.916		759.539	739.28		849.63	606.168
604.195	2644.55								618.028	1357.85		1449.99	1742.97											1372.62	2131.34		500.55	166.735		266.67	197.916		1180.95	3310.72		979.192	170.959
624.395	2709.95								526.941	825.656		760.316	499.467											943.114	1216.17		525.175	-21.3899		237.67	251.583		664.021	1099.01		524.85	142.293
720.195	2371.55								1459.38	4296.93		1078.34	1171.71											504.91	1106.75		1032.18	411.36		303.703	-236.884		1404.02	3149.09		1108.59	427.167
714.095	3008.45								1439	2879.76		855.426	896.16											2355.78	4865.76		804.05	-296.39		285.703	1071.12		1396.02	2774.76		795.182	284.408
598.695	2568.55								694.669	865.111		1363.57	1609.82											515.41	1143.15		644.765	352.628		240.903	586.116		1103.45	3239.46		424.192	199.959
667.895	2943.05								649.941	1125.66		850.452	1150.94											476.858	489.886		710.479	4.34228					1086.02	1634.76		1052.32	379.696
631.195	3076.55								667.941	1027.66		1180.68	1766.36											1304.42	2069.69		660.717	125.652					1243.44	2153.47		900.894	654.819
336.395	2034.45								859.288	2140.78		936.114	1510.54											452.91	-77.8507		619.55	-360.682					1106.02	1886.76		831.353	250.12
286.195	1593.05								1179.94	2244.66		934.218	1488.52											1319.8	2903.44		1980.45	1020.29					933.771	2601.01		862.704	213.006
520.895	2751.95								1439.35	3826.71		1074.64	1453.58											497.092	548.967		1227.65	-418.915					1082.02	1844.76
836.295	3536.45								1241.94	3907.66		1188.89	1360.4											1097.25	1945.4								1264.46	3205.46
444.195	2299.55								1118.25	3051.77		1294.32	1823.85											1414.91	2098.15								1745.29	2260.29
456.195	2614.85								1043.52	3174.68		1077.02	1185.39											1397.91	2308.15								1070.07	2630
665.995	3675.35								569.826	2137.73		1096.72	1013.87											1663.4	3733.7								1526.02	1814.23
865.195	4303.95								844.608	3651.32		890.273	910.404																				731.55	1615.29
833.995	3504.05								593.414	955.739		1108.86	1156.38																				1405.52	2459.69
748.795	3243.85								972.51	5008.52		1195.33	1361.13																				1183.26	2584.55
810.195	3178.55								1146.51	3352.07		930.78	1140.76																				1327.32	2071.53
805.695	3330.45								644.941	2016.66		900.576	627.618
703.895	3130.95								1129.73	3437.38		1147.71	1473.77
771.195	3285.55								601.667	2810.44		774.231	753.672
596.195	3101.05								1107.86	3410.52		1147.31	1511.65
650.195	3484.55								625.408	1287.82		1362.45	1849.53
738.695	3919.35								1228.78	3469.26
712.095	3762.95								853.381	2314.05
398.395	2128.05								334.52	982.656
691.595	3790.05								1421.86	4019.66
646.695	3712.55								559.164	1487.3
679.195	2995.55								383.341	1305.53
658.195	3735.05
653.195	3640.55
551.895	2700.25
676.195	3214.55
658.195	3553.55
656.195	3479.55
648.195	3522.55
694.695	3535.25
516.195	2735.55
673.195	3174.55
636.195	3227.55
669.195	3344.55
644.195	3591.55
665.995	3206.55
495.795	2902.35
655.195	3253.55
693.595	2946.75
487.995	2851.65
433.195	2948.55
403.195	2684.55
684.995	3984.55
387.595	2296.65
365.095	2447.05
305.195	2478.55
329.195	2176.55

## Sheet: Ratio mCherryGFP
	Mean= 3.289249072					Ratio normalised to mean interphase
	Interphase	Prometaphase	Metaphase	Anaphase		Interphase	Prometaphase	Metaphase	Anaphase
	Ratio BLM/mCherry	Ratio BLM/mCherry	Ratio BLM/mCherry	Ratio BLM/mCherry		Ratio BLM/mCherry	Ratio BLM/mCherry	Ratio BLM/mCherry	Ratio BLM/mCherry
	0.938488	0	0.212409	6.54783		0.28532	0	0.0645767	1.99068
	0.934595	0.719948	11.087	4.95697		0.284136	0.218879	3.37069	1.50702
	1.09792	0	0.98806	6.31841		0.333791	0	0.300391	1.92093
	1.09516	0.761755	0.602598	4.10206		0.332951	0.231589	0.183202	1.24711
	1.1935	0.507923	1.0686	4.31074		0.362848	0.154419	0.324878	1.31055
	0.754874	0	0.712034	4.47284		0.229497	0	0.216473	1.35984
	0.911746	0.530806	0.1744	4.91437		0.27719	0.161376	0.0530212	1.49407
	1.03164	0.274551	0.929834	5.1453		0.313639	0.0834691	0.282689	1.56428
	1.15766	0.375237	0.941498	4.45181		0.351953	0.11408	0.286235	1.35344
	0.933217	0.517661	2.84932	4.09569		0.283717	0.15738	0.866253	1.24517
	0.988869	0.592401	1.48887	4.8535		0.300637	0.180102	0.452647	1.47556
	0.861042	0.676358	1.08601	3.81731		0.261775	0.205627	0.33017	1.16054
	1.23209	0.200251	0.715447	5.18822		0.374581	0.0608804	0.217511	1.57733
	0.886421	0.19245	0.441267	5.16101		0.26949	0.0585087	0.134154	1.56905
	1.13499	0.539532	1.41047	5.92753		0.345059	0.164029	0.428811	1.80209
	1.11487	0.251946	0.70621	3.3823		0.338944	0.0765968	0.214703	1.02829
	1.14099	0	0.800311	4.40996		0.346884	0	0.243311	1.34072
	0.799576	0	0.749669	4.29006		0.243088	0	0.227915	1.30427
	1.97668	0	0.667607	4.63235		0.600952	0	0.202966	1.40833
	0.94058	0.333589	2.49187	4.40285		0.285956	0.101418	0.757579	1.33856
	1.14514	0	1.64374	4.57261		0.348146	0	0.49973	1.39017
	0.617837	0.142976	29.6616	4.19191		0.187835	0.0434675		1.27443
	0.964304	0	1.46409	4.79264		0.293169	0	0.445114	1.45706
	1.14932	0	0	5.33737		0.349418	0	0	1.62267
	1.35994	0	1.39046	3.69119		0.413451	0	0.422729	1.1222
	0.901725	0	0.632789	4.85138		0.274143	0	0.192381	1.47492
	1.48142	0.58354	1.54092	3.88268		0.450382	0.177408	0.46847	1.18042
	1.19984	0.250471	1.87577	5.61807		0.364777	0.0761484	0.570273	1.70801
	1.40062	0	1.38955	4.21482		0.425818	0	0.422453	1.28139
	1.0085	0.432117	2.13928	4.82887		0.306605	0.131373	0.650386	1.46808
	1.5625	0.744635	0.475682	4.30311		0.475032	0.226385	0.144617	1.30824
	1.08431	0	0.428342	4.38927		0.329652	0	0.130225	1.33443
	1.85409	0.787082	3.67748	5.00081		0.563681	0.239289	1.11803	1.52035
	2.78413	0.989965	1.03269	5.52367		0.846432	0.30097	0.31396	1.67931
	2.97837	1.35202	2.59272	5.06476		0.905486	0.411042	0.788241	1.53979
	1.27358	1.48346	2.55891	5.05431		0.387195	0.451001	0.777963	1.53662
	1.93465	1.28475	1.16713	4.31361		0.588174	0.390589	0.354833	1.31143
	2.45305	2.26098	2.75296	3.70032		0.745779	0.687384	0.836957	1.12497
	1.78894	1.09891	0.610529	4.05505		0.543874	0.33409	0.185613	1.23282
	2.36333	1.60957	0.0706687	4.37698		0.718501	0.489343	0.0214847	1.33069
	2.27685	0.669432	2.86756	4.34012		0.69221	0.203521	0.871799	1.31949
	2.14253	0.967453	1.94484	3.29293		0.651374	0.294126	0.591271	1.00112
	2.10507	1.50933	0	4.21295		0.639984	0.458869	0	1.28083
	2.57477	1.8083	0.512163	4.29025		0.782782	0.54976	0.155708	1.30432
	2.48741	1.34896	0.512674	4.40645		0.756225	0.410113	0.155864	1.33965
	2.20892	1.04047	0.468207	4.87417		0.671557	0.316323	0.142345	1.48185
	2.41748	2.2002	0.316565	6.0478		0.734964	0.668905	0.0962423	1.83866
	3.16545	0.417812	0.717085	5.56631		0.962364	0.127023	0.218009	1.69227
	2.55128	1.41811	0.642192	5.28312		0.775641	0.431135	0.19524	1.60618
	1.89413	1.4835	0.296493	4.22871		0.575854	0.451015	0.0901401	1.28562
	2.07354	0.691569	0.21033	5.17689		0.6304	0.210251	0.0639448	1.57388
	2.03369	0.942921	0.224541	5.73187		0.618284	0.286667	0.0682653	1.74261
	1.51564	1.60309	0.204109	5.51858		0.460787	0.487372	0.0620533	1.67776
	2.41836	0.975566	0	4.97454		0.735233	0.296592	0	1.51236
	3.07631	1.48015	0.419197	4.20152		0.935263	0.449997	0.127445	1.27735
	2.64566	0.353578	0.610251	4.33209		0.804335	0.107495	0.185529	1.31705
	2.2775	0.9795	0.539613	3.92319		0.692407	0.297788	0.164053	1.19273
	1.17168	1.43654	0	4.13363		0.356216	0.436739	0	1.25671
	0.989275	1.31487	0.45325	4.44803		0.30076	0.399748	0.137797	1.35229
	1.56021	1.77027	0	4.26033		0.474335	0.5382	0	1.29523
	3.06324	1.04649	0.359055	5.2014		0.931289	0.318155	0.10916	1.58133
	1.85082	0.918199	0.291279	5.35924		0.562686	0.279151	0.0885549	1.62932
	2.48954	0.504199	0.37959	5.30577		0.756872	0.153287	0.115403	1.61307
	2.87528	2.56469	0.433427	5.28434		0.874144	0.779718	0.131771	1.60655
	2.67067	2.86258	0.469156	5.34156		0.811938	0.870283	0.142633	1.62394
	0	2.55684	0.116648	5.48016		0	0.777333	0.0354633	1.66608
	1.58805	3.02351	0	5.7408		0.4828	0.919209	0	1.74532
	2.53248	2.79707	0.643807	4.41044		0.769927	0.850367	0.195731	1.34087
	1.98241	1.72041	0.450421	5.67468		0.602693	0.523041	0.136937	1.72522
	2.19933	2.5329	0.325626	5.57345		0.668643	0.770053	0.0989972	1.69444
	2.0157	2.9597	0	4.89269		0.612814	0.899809	0	1.48748
	0.846806	1.11145	0.0625251	4.75388		0.257447	0.337904	0.0190089	1.44528
	1.86759	2.12167	0.37599	5.39893		0.567786	0.645032	0.114309	1.64139
	2.5671	2.51105	0	5.30261		0.780452	0.763411	0	1.6121
	2.326	3.48535	0	5.4344		0.707152	1.05962	0	1.65217
	1.67979	1.30327	0.297611	5.08892		0.51069	0.396221	0.0904799	1.54714
	0	0.415796	0.251872	5.29945		0	0.126411	0.0765743	1.61114
	2.3268	2.13727	0	4.71565		0.707394	0.649774	0	1.43365
	2.75941	1.95821	0	5.07321		0.838917	0.595338	0	1.54236
	1.99597	0	2.47688	4.99787		0.606817	0	0.753023	1.51946
	1.73097	3.50357	3.08371	5.57525		0.52625	1.06516	0.937513	1.69499
	2.73173	1.65116	1.40426	4.81467		0.830504	0.501988	0.426924	1.46376
	1.91734	2.18119	2.65168	5.85393		0.582912	0.663126	0.806166	1.77972
	2.79558	2.70428	1.48067	4.96577		0.849915	0.822157	0.450154	1.5097
	2.59128	1.79477	1.56508	4.24852		0.787804	0.545648	0.475816	1.29164
	2.95097	1.01637	2.69931	5.8436		0.897156	0.308998	0.820647	1.77658
	0.615145	3.02709	1.21495	6.80652		0.187017	0.920299	0.369369	2.06932
	2.89099	1.42432	1.09043	6.65819		0.87892	0.433022	0.331515	2.02423
	1.54102	2.72317	2.03982	5.8169		0.468501	0.8279	0.620147	1.76846
	3.24267	2.06474	1.35766	5.92538		0.98584	0.627724	0.412756	1.80144
	3.75278	1.88704	1.38463	6.7025		1.14092	0.5737	0.420955	2.0377
	1.09176	2.97398	2.49879	8.1212		0.331916	0.904152	0.759685	2.46901
	1.02107	1.91351	1.26085	6.61173		0.310425	0.581746	0.383323	2.0101
	1.06018	3.39149	3.01949	4.0793		0.322317	1.03108	0.917989	1.24019
	1.34405	1.82626	2.93286	3.40861		0.408618	0.55522	0.891649	1.03629
	1.1166	3.25564	1.81976	2.44257		0.33947	0.989782	0.553245	0.74259
	1.02314	2.22333	1.23422	2.55045		0.311056	0.675937	0.375228	0.775389
	1.26052	3.40172	1.66003	3.73096		0.383224	1.03419	0.504683	1.13429
	1.05487	2.33897	2.59695	4.11937		0.320703	0.711095	0.789527	1.25237
	1.04015	1.40672	1.36987	3.20609		0.316229	0.427671	0.416468	0.974719
	1.41373	4.08994	0.626312	3.87515		0.429804	1.24343	0.190412	1.17813
	1.48737	1.84876	1.37102	3.35388		0.45219	0.562061	0.416817	1.01965
	1.23037	2.34291	0	3.54103		0.374057	0.712293	0	1.07655
	1.47501	2.91128	1.20467	2.30755		0.448435	0.88509	0.366245	0.701543
	1.36043	2.85606	0.057422	2.76658		0.413599	0.868301	0.0174575	0.841097
	1.08071	1.93916	1.85551	2.78162		0.328559	0.589546	0.564113	0.84567
	1.32336	2.11144	0.747414	3.7672		0.40233	0.64192	0.227229	1.14531
	1.17083	1.71605	0	4.28926		0.355956	0.521715	0	1.30402
	1.24997	1.68752	1.2578	2.78293		0.380016	0.513042	0.382398	0.846068
	1.22418	2.17132	2.06852	3.81964		0.372176	0.660127	0.628872	1.16125
	1.42312	1.4457	2.06322	4.83045		0.432657	0.439524	0.627262	1.46856
	1.64608	2.37423	2.04037	3.10008		0.500443	0.721817	0.620315	0.94249
	0.671769	2.49351	0	3.26338		0.204232	0.758079	0	0.992136
	1.22995	1.46642	0	3.54873		0.373929	0.445823	0	1.07889
	1.4446	1.00995	0.959685	3.84022		0.439189	0.307046	0.291764	1.16751
	0.787719	1.85735	1.01881	3.04828		0.239483	0.564672	0.30974	0.926741
	1.35722	1.49784	1.06439	3.23428		0.412623	0.455374	0.323596	0.983289
	0.811833	1.80088	0.836005	3.36807		0.246814	0.547505	0.254163	1.02396
	1.02389	1.29202	0	3.03902		0.311285	0.392802	0	0.923926
	1.17829	1.42339	1.09734	3.37545		0.358224	0.432741	0.333615	1.02621
	1.03945	1.37011	0.561482	3.02092		0.316015	0.416541	0.170702	0.918422
	1.27612	1.57561	0	2.58213		0.387968	0.479019	0	0.785022
	1.18573	1.45997	0	2.82465		0.360487	0.44386	0	0.858751
	1.01903	2.13436	0.554521	3.31511		0.309807	0.648889	0.168586	1.00786
	1.22276	1.67556	0	3.24367		0.371745	0.509405	0	0.986143
	0.727024	1.64638	0	4.0451		0.22103	0.500533	0	1.22979
	1.28528	1.6246	0.392157	3.19495		0.390753	0.493911	0.119224	0.971331
	0.896624	1.25497	1.00514	3.90162		0.272592	0.381538	0.305583	1.18617
	1.1119	1.18333	0	3.37072		0.338041	0.359756	0	1.02477
	1.20184	1.36034	0	5.38811		0.365383	0.413571	0	1.6381
	1.34403	2.39907	0.890163	0		0.408614	0.729368	0.270628	0
	0.997198	1.45871	0	5.13357		0.303169	0.443478	0	1.56071
	1.25348	2.23543	0	5.15862		0.381083	0.679619	0	1.56833
	1.3268	1.80337	0	5.9463		0.403374	0.548261	0	1.8078
	1.3262	1.7609	0	5.0093		0.403192	0.535349	0	1.52293
	1.26389	1.80647	0.25331	4.44464		0.384247	0.549206	0.0770115	1.35126
	1.34417	1.37025	0.334381	6.46529		0.408657	0.416585	0.101659	1.96558
	1.36765	1.86872	0.302382	5.74565		0.415794	0.568128	0.0919304	1.7468
	1.26909	1.67608	0	0.626522		0.385831	0.509563	0	0.190476
	1.38659	1.85159	0.924664	0		0.421553	0.562921	0.281117	0
	2.33683	2.09044	0	6.36592		0.710445	0.635538	0	1.93537
	12.6805	1.85802	0	2.6486		3.85514	0.564878	0	0.805228
	14.8468	1.30934	0	4.60985		4.51373	0.398067	0	1.40149
	11.6608	1.59262	0	4.68564		3.54513	0.484191	0	1.42453
	11.3789	0	0	3.18436		3.45943	0	0	0.968112
	10.9237	1.03813	0	0		3.32104	0.315613	0	0
	11.7505	1.19481	0	6.46081		3.5724	0.363247	0	1.96422
	10.647	1.84813	0	3.3014		3.23691	0.56187	0	1.00369
	10.7428	1.33116	0	7.76715		3.26603	0.404699	0	2.36138
	9.23305	1.3671	0	5.17839		2.80704	0.415626	0	1.57434
	7.73436	1.63013	0.326504	2.71851		2.35141	0.495593	0.0992641	0.826483
	7.92785	1.23542	1.22917	5.80645		2.41023	0.375592	0.373693	1.76528
	15.3786	0.985196	0.440575	6.28495		4.6754	0.29952	0.133944	1.91075
	12.7132	2.3569	1.28623	8.10334		3.86507	0.716547	0.391041	2.46358
	9.67602	1.87902	1.98776	7.41361		2.94171	0.57126	0.604319	2.25389
	13.4627	3.68941	2.58911	5.67462		4.09294	1.12166	0.787143	1.7252
	8.1774	2.77945	1.46117	1.24529		2.4861	0.845011	0.444227	0.378593
	10.6097	3.66911	1.72936	2.04054		3.22556	1.11549	0.525763	0.620367
	9.73936	2.38352	3.04642	0.632496		2.96097	0.72464	0.926175	0.192292
	10.7071	4.12406	2.55262	4.76205		3.25519	1.2538	0.77605	1.44776
	11.9342	0.245987	1.75064	3.81466		3.62824	0.0747853	0.532231	1.15974
	14.1517	0	2.07142	2.95732		4.30242	0	0.629755	0.899088
	10.8906	3.3923	0	2.53791		3.31098	1.03133	0	0.771578
	15.0137	1.99824	0.773496	2.00654		4.56448	0.607506	0.235159	0.610031
	10.0633	2.77563	0.504571	1.70665		3.05945	0.84385	0.1534	0.518857
	11.0602	3.61015	0.54759	3.95933		3.36252	1.09756	0.166479	1.20372
	13.4614	0.892737	1.1001	4.12599		4.09256	0.271411	0.334454	1.25439
	12.1526	3.47961	0.690538	0		3.69465	1.05787	0.209938	0
	10.0786	4.47642	0.399358	3.91658		3.06411	1.36093	0.121413	1.19072
	7.3502	3.93707	1.0558	3.14152		2.23461	1.19695	0.320986	0.955088
	13.25	3.62052	1.24375	2.62719		4.02828	1.10071	0.378125	0.79872
	10.9833	4.72843	1.47215	2.48147		3.33917	1.43754	0.447563	0.754418
	11.1474	3.68205	1.88379	3.09121		3.38904	1.11942	0.57271	0.939791
	10.7361	3.30608	2.31972	2.78795		3.264	1.00512	0.705242	0.847594
	9.95973	5.53015	1.66456	7.35617		3.02797	1.68128	0.50606	2.23643
	12.7356	3.70229	0.250053	4.15473		3.8719	1.12557	0.0760213	1.26312
	9.85153	3.27475	1.00559	3.48617		2.99507	0.995591	0.305719	1.05987
	5.73123	1.47307	1.43628	2.85845		1.74241	0.447843	0.436658	0.869027
	11.4645	6.07343	0.799467	4.0291		3.48544	1.84645	0.243054	1.22493
	13.0651	3.49178	1.39334	3.23848		3.97205	1.06157	0.423606	0.984565
	8.6317	3.55446	1.61904	3.62974		2.62422	1.08063	0.492222	1.10352
	11.0116	8.66751	1.08895	2.77315		3.34775	2.6351	0.331063	0.843097
	13.9632	3.9852	3.20392	0.311238		4.2451	1.21158	0.974057	0.0946229
	12.2772	1.19655	1.19742	3.50264		3.73253	0.363776	0.36404	1.06488
	10.3613	1.04146	0.702281	0.690163		3.15004	0.316626	0.213508	0.209824
	9.58707	1.24958	0.748109	2.66378		2.91467	0.379897	0.227441	0.809844
	10.6368	0.946226	0	3.30433		3.2338	0.287672	0	1.00458
	11.5008	1.35283	1.45521	2.15243		3.49648	0.411287	0.442415	0.654384
	14.5632	0.529133	2.39163	2.16297		4.42752	0.160868	0.727107	0.657588
	12.4202	1.31782	0	2.18585		3.77598	0.400644	0	0.664544
	13.1389	1.53205	1.22047	2.02053		3.9945	0.465775	0.371047	0.614284
	9.99665	1.02477	2.08296	2.64408		3.03919	0.311552	0.633262	0.803855
	10.0803	0.701161	2.30344	3.24582		3.06462	0.213167	0.700295	0.986797
	9.21744	0.918781	1.1737	4.36325		2.80229	0.279328	0.356828	1.32652
	14.856	1.29836	1.66384	3.56948		4.51654	0.394728	0.505841	1.0852
	13.5895	2.16034	2.2467	2.27508		4.13149	0.656787	0.683042	0.691672
	9.92156	1.49697	1.69245	2.13302		3.01636	0.45511	0.51454	0.648483
	10.5286	0.128564	2.77607	5.24736		3.2009	0.0390861	0.843982	1.59531
	9.6346	1.27115	2.83213	2.70104		2.92912	0.386455	0.861027	0.821172
	14.7239	1.18754	2.30125	2.23133		4.47637	0.361037	0.699629	0.678372
	11.7946	1.27378	2.92503	2.19706		3.58581	0.387256	0.889269	0.667953
	8.30326	0.370971	2.11307	1.56688		2.52436	0.112783	0.642418	0.476365
	8.83801	0.805614	1.74946	2.94435		2.68694	0.244924	0.531873	0.895144
	8.60894	0.721281	2.48411	2.00122		2.6173	0.219284	0.755221	0.608412
	7.41846	0.706254	2.08296	1.24536		2.25537	0.214716	0.633262	0.378614
	8.57655	0.615195	3.33872	1.73193		2.60745	0.187032	1.01504	0.526544
	7.83036	1.64035	3.21915	1.53854		2.38059	0.498699	0.978687	0.467749
	10.2692	1.27634	1.2272	2.49134		3.12204	0.388034	0.373096	0.757418
	7.57085	0.285347	3.21412	1.90235		2.3017	0.0867515	0.977159	0.578352
	7.1195	0	2.89226	2.65865		2.16448	0	0.879306	0.808284
	7.98989	0.612059	0.893693	3.14641		2.42909	0.186079	0.271701	0.956574
	7.87799	0	1.98068	2.72906		2.39507	0	0.602167	0.82969
	8.19112	1.30195	4.2742	3.04227		2.49027	0.395819	1.29945	0.924914
	10.1495	0.769228	2.30107	3.75155		3.08565	0.233861	0.699573	1.14055
	8.40803	1.91756	1.10494	4.3231		2.55622	0.582977	0.335926	1.31431
	8.89147	2.07306	2.49211	1.61058		2.70319	0.630253	0.757654	0.489649
	7.8778	2.74104	1.82543	5.1501		2.39502	0.833333	0.554969	1.56574
	8.67127	1.37385	2.3905	2.92371		2.63625	0.417679	0.726763	0.888869
	6.97688	1.17398	0.580689	3.12688		2.12112	0.356915	0.176542	0.950637
	6.11166	0.963516	0	3.04265		1.85807	0.292929	0	0.925028
	8.31076	1.01564	5.57021	4.67109		2.52664	0.308776	1.69346	1.42011
	6.82701	1.08017	0	3.07848		2.07555	0.328393	0	0.935921
	7.74871	0.592467	0.309531	2.05917		2.35577	0.180122	0.0941037	0.626031
	8.99641	1.10012	2.53417	2.82333		2.7351	0.334459	0.770439	0.858351
	7.59805	0.97385	5.28193	2.71163		2.30996	0.296071	1.60582	0.824391
	6.75122	0.779798	0	2.93751		2.05251	0.237075	0	0.893063
	8.06058	0.423689	5.94405	2.82704		2.45058	0.12881	1.80711	0.859478
	8.19158	0.327829	1.95457	2.65986		2.49041	0.0996668	0.594229	0.808651
	9.73157	0.815295	4.54271	3.40566		2.9586	0.247867	1.38108	1.03539
	8.30193	0.682165	0	1.25484		2.52396	0.207392	0	0.381497
	8.34915	0.518815	1.12351	1.57177		2.53832	0.15773	0.341569	0.47785
	7.8535	0	0	1.23989		2.38763	0	0	0.376952
	7.46491	0.541654	0.344641	1.12913		2.26949	0.164674	0.104778	0.343279
	6.78614	0.328058	0	1.48065		2.06313	0.0997366	0	0.45015
	8.47209	0.530131	0.803438	1.13205		2.57569	0.161171	0.244262	0.344168
	9.02491	0.442245	0.649454	1.29536		2.74376	0.134452	0.197448	0.393815
	12.1419	0.736536	0.596584	1.4778		3.6914	0.223922	0.181374	0.449282
	6.4863	0.953996	1.28721	1.44454		1.97197	0.290035	0.391338	0.439169
	7.8687	0.809492	0.375399	1.33195		2.39225	0.246102	0.114129	0.404939
	8.26071	0.689713	0.00290031	1.31165		2.51143	0.209687	0.000881755	0.39877
	10.3262	0.488067	0.87916	1.15011		3.13938	0.148382	0.267283	0.349656
	6.94969	0.62472	0.328192	1.47502		2.11285	0.189928	0.0997771	0.448436
	7.82488	0.690284	0.610409	1.10003		2.37893	0.209861	0.185577	0.334432
	8.96304	0.527699	0	1.24832		2.72495	0.160431	0	0.379514
	7.83274	0.688366	0.647648	1.02289		2.38132	0.209278	0.196899	0.310981
	11.1826	0.428599	0.295979	1.64462		3.39974	0.130303	0.0899838	0.499997
	7.5033	0.736937	0.307091	1.33366		2.28116	0.224044	0.0933621	0.405461
	7.72396	0.585992	0.410827	1.35539		2.34824	0.178154	0.1249	0.412065
	6.68482	0.473311	0.317584	1.34129		2.03232	0.143896	0.0965522	0.407779
	7.77269	0.620482	0	1.34135		2.36306	0.188639	0	0.407798
	12.4632	0.592931	0.81451	1.24613		3.78908	0.180263	0.247628	0.378848
	6.13694	0.716418	0.49122	1.73616		1.86576	0.217806	0.149341	0.527827
	7.11707	0.0866118	0.537338	1.42		2.16374	0.0263318	0.163362	0.431709
	7.58944	0.383651	0	1.17657		2.30735	0.116638	0	0.357702
	9.71869	1.58007	0.604821	0.800136		2.95468	0.480374	0.183878	0.243258
	8.16396	0.962891	0.630967	1.51157		2.48201	0.292739	0.191827	0.459548
	9.84868	1.12659	1.4079	1.1954		2.9942	0.342508	0.428032	0.363427
	8.53205	1.35013	0.650377	1.06354		2.59392	0.410467	0.197728	0.323339
	5.74674	1.15168	1.12481	1.49901		1.74713	0.350134	0.341965	0.455729
	7.93567	1.18824	0.792476	1.14426		2.41261	0.361248	0.240929	0.347878
	7.02814	0.923976	0.84281	1.0173		2.1367	0.280908	0.256232	0.309279
	7.9926	1.31919	#DIV/0!	1.20179		2.42992	0.401061		0.36537
	7.34338	1.22642	0.86422	1.42463		2.23254	0.372857	0.262741	0.433117
	2.1615	1.50186	1.2623	1.32396		0.657139	0.456595	0.383766	0.402512
	2.57563	1.59989	0.835296	1.12993		0.783046	0.486401	0.253947	0.343522
	2.31701	1.2144	0.985719	1.17062		0.704419	0.369203	0.299679	0.355894
	2.3302	0.921223	0.822607	1.7227		0.708431	0.280071	0.250089	0.523737
	2.38223	0.935449	0.195379	1.11009		0.724248	0.284396	0.0593993	0.33749
	2.3558	1.39813	1.40213	1.20205		0.716212	0.425061	0.426275	0.365449
	2.8634	1.64041	0.353719	0.65692		0.870533	0.49872	0.107538	0.199717
	1.79985	1.74062	0.939385	1.08659		0.547193	0.529186	0.285592	0.330345
	2.58744	0.871183	1.41636	1.04762		0.786635	0.264858	0.430602	0.318498
	3.23785	1.43787	1.17711	1.1806		0.984375	0.437143	0.357866	0.358926
	2.62194	1.64403	1.13172	1.35333		0.797124	0.499818	0.344065	0.41144
	2.26321	1.12225	0.857743	1.49605		0.688063	0.341188	0.260772	0.454832
	2.46122	1.70206	1.06686	1.61363		0.748261	0.517462	0.324347	0.490576
	1.96925	0.895483	2.64024	1.59334		0.598693	0.272245	0.802688	0.484407
	2.08738	2.53918	0.238207	1.35263		0.634607	0.771964	0.07242	0.411228
	3.43567	0.5823	0.813564	1.14426		1.04452	0.177031	0.24734	0.347878
	2.08459	0.6664	2.26307	1.40912		0.633758	0.202599	0.68802	0.428402
	2.2085	1.11339	1.19818	1.10062		0.67143	0.338493	0.364272	0.334612
	2.12531	2.17648	0.16931	0.924453		0.646137	0.661694	0.0514737	0.281053
	2.90534	0.960246	1.10867	1.02261		0.883284	0.291935	0.337058	0.310896
	2.6226	1.37303	2.72904	1.04285		0.797324	0.41743	0.829684	0.317049
	2.38453	1.79729	1.43055	1.13871		0.724947	0.546414	0.434915	0.346192
	2.56314	1.24139	1.0976	1.2256		0.779248	0.377409	0.333693	0.372608
	1.85686	0.720476	1.03778	0.696907		0.564524	0.21904	0.315506	0.211874
	2.6587	1.37028	0.934085	1.2841		0.8083	0.416594	0.283981	0.390392
	2.22361	0.860751	0.779179	0.973445		0.676025	0.261686	0.236886	0.295948
	2.03486	0.573815	0.371225	1.31757		0.61864	0.174452	0.11286	0.400568
	1.81533	1.84625	0.452682	1.35751		0.551897	0.561298	0.137625	0.41271
	3.27583	1.22089	0.886672	1.39966		0.99592	0.371176	0.269567	0.425525
	2.43124	1.3499	0.775298	2.59536		0.739147	0.410396	0.235707	0.789042
	2.47105	1.01056	0.558047	1.84524		0.751249	0.30723	0.169658	0.560992
	2.44703	0.294735	0.0594902	2.16691		0.743948	0.0896054	0.0180862	0.658785
	2.4599	1.3587	1.08114	1.73162		0.747861	0.413073	0.32869	0.526447
	1.72199	0.442638	0	3.16229		0.52352	0.134571	0	0.961401
	2.71459	1.55801	0	2.31012		0.825293	0.473667	0	0.702325
	2.31298	1.24734	0.153465	2.63733		0.703193	0.379218	0.0466564	0.801804
	2.52188	1.13345	0	2.30704		0.766704	0.344593	0	0.701389
	1.83281	1.2894	0	2.3542		0.557211	0.392005	0	0.715724
	2.12124	0.806295	0.394223	2.49644		0.6449	0.24513	0.119852	0.75897
	2.8658	1.74861	0.826567	2.47818		0.871264	0.531614	0.251293	0.753418
	2.79967	2.07342	1.02077	1.92313		0.851158	0.630363	0.310335	0.584671
	2.4086	1.62798	0.231555	0.998889		0.732266	0.494938	0.0703974	0.303683
	2.18955	0.839775	0	2.53534		0.665669	0.255309	0	0.770795
	3.05986	0.586101	0.661201	2.53478		0.930261	0.178187	0.201019	0.770626
	2.18015	1.40333	0	1.68885		0.662811	0.426642	0	0.513447
	2.24755	2.156	0.218549	1.80318		0.683302	0.655468	0.0664435	0.548206
	1.72444	0.385162	0.75199	0		0.524267	0.117097	0.22862	0
	2.64399	0.985837	0.459077	1.23259		0.803827	0.299715	0.139569	0.374733
	3.2239	0.408796	0.649566	1.51165		0.980133	0.124283	0.197482	0.459572
	3.0431	1.64641	0.352861	0		0.925165	0.500544	0.107277	0
	1.91058	1.18088	0.785292	0.345254		0.580857	0.359012	0.238745	0.104964
	1.90373	0.814289	0.62438	2.10648		0.578773	0.247561	0.189824	0.640415
	2.94135	0.794591	0.490741	0		0.894232	0.241572	0.149195	0
	2.58983	1.37675	0.566988	2.39764		0.787361	0.418559	0.172376	0.728931
	3.08159	1.36034	0.79358	0.579801		0.936869	0.413571	0.241265	0.176272
	2.6056	1.88861	0.447423	2.19233		0.792157	0.574175	0.136026	0.666514
	2.29555	0.990602	0.466015	1.22193		0.697895	0.301164	0.141678	0.371493
	1.74812	1.29263	1.19717	3.50929		0.531464	0.392986	0.363965	1.0669
	2.55332	1.92434	0.283593	1.20343		0.776263	0.58504	0.0862183	0.365868
	2.65213	1.14002	0.0236312	4.03047		0.806302	0.346589	0.00718437	1.22535
	2.08754	1.1251	0.660806	2.80927		0.634655	0.342055	0.200899	0.854077
	2.61875	2.00639	0.680023	5.29806		0.796154	0.609983	0.206741	1.61072
	1.55941	0.939751	0.268759	7.56146		0.474093	0.285704	0.0817084	2.29884
	1.65073	1.03892	0.285062	2.33136		0.501858	0.315852	0.0866649	0.708782
	1.57067	1.36125	0	2.90418		0.477517	0.413848	0	0.882932
	1.76567	1.36704	0.0317932	2.33653		0.536801	0.415609	0.0096658	0.710353
	2.63298	1.57174	0.666104	1.95397		0.800481	0.477842	0.202509	0.594049
	2.3263	1.14626	0.423172	0.866536		0.707243	0.348486	0.128653	0.263445
	2.65036	1.09348	0.071185	4.46885		0.805765	0.33244	0.0216417	1.35862
	2.62681	1.23738	0.304012	0.675913		0.798604	0.37619	0.0924259	0.205492
	1.35675	0.799595	0.360411	0		0.412479	0.243093	0.109572	0
	2.58643	1.36566	0.457459	0.00212551		0.78633	0.415189	0.139077	0.0006462
	3.00243	1.82725	1.99385	2.20152		0.912801	0.555521	0.606172	0.669308
	1.97631	0.303664	0.451472	2.89008		0.600841	0.0923201	0.137257	0.878643
	2.28882		2.24508	2.38595		0.695847		0.68255	0.725377
	2.27026		0.446117	1.66304		0.690206		0.135629	0.505599
	2.05774		0.578874	1.53359		0.625597		0.17599	0.466244
	2.35844		0.256203	1.54287		0.717014		0.0778911	0.469066
	1.85906		0.329126	1.7755		0.565191		0.100061	0.539789
	2.28518		0.349344	1.56582		0.694742		0.106208	0.476043
	3.00608		0.172041	1.21067		0.913911		0.0523039	0.36807
	2.5964		0	1.27984		0.78936		0	0.389098
	1.81914		0.350346	1.58663		0.553056		0.106512	0.48237
	1.49575		0.424576	1.95134		0.454739		0.12908	0.593247
	2.36184		0	1.58924		0.718048		0	0.483161
	2.20115		0.832248	1.2612		0.669196		0.253021	0.383431
	1.74569		1.98844	1.40256		0.530727		0.604526	0.426407
	1.60394		0.765924	1.41085		0.487632		0.232857	0.428927
	2.38589		0.396702	1.35402		0.72536		0.120606	0.411649
	2.8936		1.07952	1.07664		0.879714		0.328196	0.327322
	2.25573		0.468891	2.00914		0.685789		0.142553	0.61082
	2.35269		0.18751	1.43475		0.715268		0.0570069	0.436195
	3.51238		0.846792	1.48685		1.06784		0.257442	0.452032
	4.29085		0	2.012		1.30451		0	0.611689
	3.96645		0.482157	1.73768		1.20588		0.146586	0.528292
	2.55425		0.540602	2.16875		0.776547		0.164354	0.659345
	3.35834		0.52675	1.92779		1.021		0.160143	0.586089
	3.49892		0.311176	1.36045		1.06374		0.0946041	0.413605
	4.02589		0.167961	1.93547		1.22395		0.0510636	0.588424
	2.82596		0.518696	1.39723		0.85915		0.157694	0.424788
	3.32256		0.364109	1.04941		1.01013		0.110697	0.319042
	3.86269		0.21028	1.87108		1.17434		0.0639295	0.568847
	3.46134		0.308164	1.29992		1.05232		0.0936882	0.395201
	3.56556		0.6658	1.68779		1.084		0.202417	0.513122
	3.58388		0.245575	1.91798		1.08957		0.0746598	0.583105
	2.84733		1.81544	0.286655		0.865649		0.55193	0.087149
	3.93801		0.367592	2.20667		1.19724		0.111756	0.670872
	2.94934		0.315137	1.92661		0.89666		0.0958082	0.585728
	3.12228		1.22022	2.86202		0.949238		0.370971	0.870115
	3.37301		0.317096	2.06127		1.02547		0.0964037	0.626669
	3.33416		2.83201	3.11329		1.01365		0.86099	0.946505
	3.2718		5.10505	1.7943		0.994694		1.55204	0.545504
	3.55756		1.85467	2.36807		1.08157		0.563857	0.719943
	3.0912		9.79815	1.97756		0.939789		2.97884	0.601219
	3.45102		2.34604	1.28828		1.04918		0.713245	0.391664
	2.8771		1.37422	2.13331		0.874698		0.41779	0.648569
	3.1021		1.04572	2.15622		0.943102		0.317919	0.655536
	3.3909		0.751099	1.17944		1.0309		0.22835	0.358575
	3.25907		1.05805	1.65864		0.990826		0.32167	0.504261
	3.4442		0.766054	2.30122		1.04711		0.232896	0.699619
	3.36568		1.31765	2.1171		1.02324		0.400592	0.643643
	3.33362		1.6949	1.74935		1.01349		0.515286	0.53184
	3.95053		0.841394	2.49992		1.20104		0.255801	0.760028
	3.38277		0.695348	2.31163		1.02843		0.2114	0.702785
	2.91935		1.58268	1.97676		0.887544		0.481167	0.600977
	3.1207		0.231715	2.28491		0.948759		0.070446	0.694661
	2.68394		0.773798	1.27294		0.815975		0.235251	0.387
	2.95691		0.484242	2.55663		0.898961		0.14722	0.77727
	3.41025		0.440341	2.14273		1.03679		0.133873	0.651435
	2.79722		0.06109	1.86076		0.850412		0.0185726	0.565709
	2.8033		0.766592	2.40733		0.852262		0.23306	0.731879
	2.68741		0.548671	1.82502		0.817028		0.166807	0.554845
	1.87329		0.485901	2.12736		0.56952		0.147724	0.646761
	3.89874		0.152571	1.11974		1.1853		0.0463847	0.340425
	3.35938		0.144104	2.11619		1.02132		0.0438105	0.643366
	2.27741		0.939388	1.59581		0.692381		0.285593	0.485159
	2.77165		0.330976	0.962621		0.842638		0.100624	0.292657
	2.84945		0.0841187	0.840461		0.866292		0.0255738	0.255517
	2.69927		0.731296	1.21383		0.820635		0.222329	0.369031
	3.32032		0.856905	2.03802		1.00945		0.260517	0.619602
	2.61036		0.497086	1.78005		0.793603		0.151125	0.541171
	2.49821		0	1.7671		0.759509		0	0.537236
	3.3491		0.126868	0.129159		1.0182		0.0385706	0.0392671
	3.06399		0.269789	1.55275		0.931517		0.0820215	0.472068
	3.00087		0.606922	1.28952		0.912326		0.184517	0.392042
	3.53222		1.55317	2.19197		1.07387		0.472196	0.666405
	3.47189		1.79725	2.06545		1.05553		0.5464	0.627941
	3.12682		0.512703	2.21794		0.950619		0.155872	0.6743
	2.78719		0.870654	1.02732		0.847362		0.264697	0.312327
	2.68339			1.58667		0.815807			0.482381
	3.3566			0		1.02047			0
	2.78102			2.19991		0.845489			0.668819
	2.09898			1.10436		0.638134			0.335748
	3.11755			1.77298		0.9478			0.539024
	2.6343			1.48289		0.800882			0.450828
	2.29882			1.65114		0.698888			0.501982
	3.36338			2.24462		1.02254			0.68241
	3.03933			0.658417		0.924018			0.200172
	1.46216			0.664844		0.444526			0.202126
	2.89817			0.495794		0.881104			0.150732
	2.98534			0.963011		0.907606			0.292775
	3.45042			0.345106		1.049			0.104919
	3.21954			0.371496		0.978806			0.112943
	2.81523			1.04457		0.85589			0.317571
	2.41592			0.578359		0.73449			0.175833
	3.02841			0.711181		0.920701			0.216214
	2.85204			0.665599		0.867078			0.202356
	2.91766			0.567699		0.887031			0.172592
	2.22786			0.340617		0.677315			0.103555
	3.03636			0.560563		0.923115			0.170423
	2.88452			0.245777		0.876954			0.0747212
	2.6243			0.582565		0.79784			0.177112
	3.59297			0.704719		1.09234			0.214249
	2.60515			0.560337		0.792019			0.170354
	3.07603			0.90619		0.935176			0.275501
	3.18441			0		0.968126			0
	2.82876			0.570357		0.860003			0.1734
	2.52999			0.147544		0.76917			0.0448565
	3.53345			0.199969		1.07424			0.0607946
	1.53101			0.819737		0.465459			0.249217
	1.26593			0		0.384869			0
	1.3215			0.626043		0.401763			0.19033
	1.31902			0.233997		0.401011			0.07114
	1.71215			0		0.520529			0
	1.29802			0.143716		0.394624			0.0436925
	1.34859			0		0.409999			0
	1.09386			0.247096		0.332557			0.0751223
	1.2232			0		0.371877			0
	1.41672			0.370759		0.430713			0.112718
	1.19785			0		0.364173			0
	0.910616			0.385616		0.276846			0.117235
	1.36201			0		0.414078			0
	1.30143			0		0.395662			0
	1.48749			0		0.452228			0
	0.807803			0		0.245589			0
	1.59853			0.53657		0.485986			0.163128
	1.73906			0.333104		0.528711			0.10127
	1.36927			0		0.416288			0
	1.59539			0.398537		0.485031			0.121164
	1.27715			0		0.388279			0
	1.66155			0.54691		0.505145			0.166272
	1.51353			0.00611176		0.460143			0.0018581
	1.33463			0.190175		0.405754			0.0578171
	1.18019			0		0.358803			0
	1.29416			0.515178		0.393451			0.156625
	1.64994			0		0.501617			0
	1.57795			2.10923		0.479729			0.641251
	1.65037			3.12294		0.501748			0.949438
	1.37276			1.29289		0.417346			0.393064
	1.24295			4.50063		0.377882			1.36829
	1.15895			3.04847		0.352345			0.9268
	1.35339			4.86209		0.41146			1.47818
	0			2.03526		0			0.61876
	1.20537			3.96438		0.366458			1.20525
	1.35493			3.28711		0.411927			0.99935
	1.74073			1.78394		0.529217			0.542353
	1.77411			1.93444		0.539367			0.588111
	2.30056			2.03922		0.699417			0.619965
	1.60669			1.79004		0.488468			0.54421
	0.728543			2.73991		0.221492			0.832989
	0.916243			2.11998		0.278557			0.644519
	1.25403			1.44108		0.381251			0.438118
	1.57394			0.574812		0.478509			0.174755
	1.57809			3.46739		0.479772			1.05416
	1.80475			0.797299		0.548681			0.242395
	1.8338			0.911512		0.557513			0.277119
	1.24343			3.37109		0.378028			1.02488
	1.70311			4.09514		0.517781			1.24501
	1.28878			3.2026		0.391814			0.973658
	1.43381			0.489973		0.435908			0.148962
	1.52649			3.44059		0.464084			1.04601
	1.27889			3.31169		0.38881			1.00682
	1.40045			3.66706		0.425765			1.11486
	1.99384			0.492194		0.606167			0.149637
	1.44975			3.68534		0.440754			1.12042
	1.97232			1.74484		0.599626			0.530467
	1.22166			4.97261		0.37141			1.51178
	1.66514			1.62779		0.506237			0.494882
	1.63475			3.394		0.496999			1.03185
	1.62261			4.35595		0.493308			1.3243
	1.47264			3.61584		0.447713			1.09929
	1.25631			2.87706		0.381944			0.874686
	1.47776			1.89131		0.449269			0.574997
	1.54556			0		0.469884			0
	1.66382			1.78786		0.505837			0.543547
	1.52479			0.742176		0.463566			0.225637
	1.29496			1.05854		0.393694			0.321818
	1.47803			0		0.449351			0
	1.54771			3.74905		0.470537			1.13979
	1.24751			2.43299		0.37927			0.73968
	1.85025			1.91868		0.562514			0.58332
	1.5423			2.34656		0.468891			0.713402
	1.49596			1.91961		0.454804			0.583601
	1.50567			2.58081		0.457756			0.784619
	1.85009			1.21789		0.562464			0.370265
	1.13759			1.86196		0.34585			0.566074
	1.42414			1.66739		0.432969			0.506921
	1.41055			1.85064		0.428837			0.562634
	1.42993			1.6217		0.434727			0.493032
	1.24731			1.40662		0.379208			0.427642
	1.44194			1.73763		0.43838			0.528276
	1.68778			1.61453		0.513121			0.490849
	1.04503			1.82979		0.31771			0.556294
	1.12514			1.35684		0.342067			0.412508
	1.34552			1.72415		0.409066			0.524177
	1.39586			0.961562		0.424372			0.292335
	0.850738			1.5883		0.258642			0.482877
	1.33038			1.59574		0.404465			0.485137
	1.8728			1.24462		0.569369			0.37839
	1.41162			1.1064		0.42916			0.336369
	0.425414			0.791732		0.129335			0.240703
	1.17904			1.19323		0.358451			0.362768
	1.59886			2.09843		0.486086			0.637966
	1.49328			2.14028		0.453988			0.650691
	0			0.989131		0			0.300716
	0.316958			1.07916		0.0963618			0.328086
	3.43221			1.15025		1.04346			0.3497
	3.38846			1.46606		1.03016			0.445712
	2.88905			1.22759		0.878332			0.373214
	2.89656			1.48464		0.880615			0.451361
	2.37896			0.722776		0.723252			0.219739
	2.70511			1.66753		0.82241			0.506964
	2.80256			1.06483		0.852037			0.323731
	3.0222			2.92787		0.91881			0.890134
	3.51122			2.59508		1.06748			0.788958
	2.59253			1.87382		0.788183			0.569681
	3.34701			2.53543		1.01756			0.770822
	3.71172			1.22787		1.12844			0.373298
	2.92985			0.973326		0.890735			0.295911
	2.74913			2.80343		0.835792			0.852302
	3.59794			1.65509		1.09385			0.50318
	3.50112			2.24291		1.06441			0.681892
	3.51425			1.98762		1.0684			0.604278
	2.94628			2.93575		0.895729			0.892529
	3.06022			1.50528		0.930371			0.457635
	3.13287			1.73187		0.952459			0.526523
	3.26385			1.7059		0.992279			0.518629
	3.28598			2.78549		0.999007			0.846848
	2.81507			1.70492		0.855839			0.518332
	3.12476			2.53504		0.949993			0.770706
	1.78073			1.29508		0.541379			0.393732
	3.0465			2.45779		0.9262			0.74722
	3.11176			1.18886		0.946041			0.361439
	2.83885			2.20804		0.86307			0.671289
	2.93816			1.75002		0.893262			0.532042
	2.83072			2.18426		0.860598			0.664059
	2.34207			1.56069		0.712037			0.474483
	3.42888			0.551779		1.04245			0.167752
	2.65815			0.411654		0.808134			0.125151
	3.13143			0.52206		0.95202			0.158717
	3.20321			0.736274		0.973842			0.223843
	3.30402			0.341054		1.00449			0.103688
	2.86344			0.435024		0.870544			0.132256
	3.31173			1.19611		1.00683			0.363643
	2.05704			1.17085		0.625384			0.355963
	3.71892			0.590906		1.13063			0.179648
	2.6513			17.1875		0.80605			5.22534
	2.03685			61.0421		0.619245
	2.71484			0.560273		0.825366			0.170335
	3.41265			0.527192		1.03752			0.160277
	1.71345			0.492666		0.520925			0.149781
	1.4956			0.373875		0.454692			0.113666
	2.35881			0.224914		0.717128			0.0683787
	1.57157			0.164306		0.477791			0.0499525
	2.15842			0.336288		0.656204			0.102239
	1.90454			0.515137		0.57902			0.156612
	2.26198			0.321971		0.687687			0.0978859
	2.29975			0		0.699172			0
	2.15389			0		0.654827			0
	1.22853			0.790368		0.3735			0.240288
	1.91038			1.24472		0.580794			0.378422
	1.77171			0.870062		0.538637			0.264517
	2.42995			0		0.738756			0
	2.16094			0.345463		0.65697			0.105028
	2.37006			0		0.720547			0
	1.67475			1.41767		0.509158			0.431001
	2.13483			0.532208		0.649034			0.161802
	1.85875			0.562185		0.5651			0.170916
	2.19719			0.44404		0.667991			0.134997
	2.29599			0.382877		0.698028			0.116402
	1.73944			1.06176		0.528826			0.322796
	2.20345			0.320136		0.669894			0.0973281
	1.46628			0.473091		0.445781			0.143829
	2.08872			0.408273		0.635013			0.124124
	1.44986			0.713449		0.440787			0.216903
	2.13485			0.174592		0.649038			0.0530797
	1.92838			0.271111		0.586268			0.0824235
	2.19304			0.385325		0.666728			0.117147
	1.75963			0.357664		0.534964			0.108737
	2.48132			0.471388		0.754373			0.143312
	1.45564			0.360818		0.442546			0.109696
	2.14314			0.726855		0.65156			0.220979
	1.97176			0.300859		0.599456			0.0914673
	2.22872			0.246905		0.677578			0.0750642
	1.40706					0.427774
	2.09662					0.637417
	1.86066					0.565679
	1.89761					0.576912
	2.13591					0.64936
	2.08464					0.633774
	1.99599					0.606823
	2.23692					0.680069
	2.39858					0.729217
	2.12074					0.644748
	2.08056					0.632534
	2.30886					0.701942
	2.53392					0.770363
	2.4224					0.736459
	3.07889					0.936047
	3.02638					0.920083
	1.16717					0.354844
	1.2851					0.390696
	1.31469					0.399692
	2.63942					0.80244
	2.68649					0.816749
	3.65535					1.1113
	3.14565					0.956343
	2.1304					0.647685
	3.53076					1.07342
	2.21975					0.674851
	2.48987					0.756972
	2.52242					0.766869
	2.81796					0.856719
	0.9918					0.301528
	2.20089					0.669116
	2.52928					0.768953
	2.74249					0.833773
	3.32665					1.01137
	1.87144					0.568957
	2.88351					0.876647
	2.34551					0.713085
	3.49567					1.06276
	0.325905					0.0990818
	2.76629					0.841011
	3.57413					1.08661
	0					0
	1.9077					0.579981
	5.10627					1.55241
	4.81852					1.46493
	0.47214					0.14354
	0					0
	0					0
	2.46785					0.750278
	2.39636					0.728545
	1.99432					0.606315
	2.08					0.632362
	2.18725					0.664971
	2.47091					0.751208
	2.63393					0.800769
	2.26335					0.688104
	2.52007					0.766152
	2.21809					0.674345
	2.28421					0.694446
	1.79042					0.544324
	2.20235					0.669561
	2.06156					0.626756
	2.08836					0.634904
	2.00522					0.609627
	2.06609					0.628135
	1.959					0.595578
	2.30155					0.699718
	1.90467					0.57906
	2.10193					0.639032
	1.72587					0.524701
	2.78539					0.846818
	2.13472					0.649
	2.05728					0.625455
	1.77819					0.540607
	1.86202					0.566093
	1.87717					0.570699
	1.94384					0.590968
	2.33712					0.710534
	1.90678					0.579702
	2.032					0.617771
	2.68514					0.81634
	2.03325					0.618151
	2.10711					0.640605
	2.38556					0.725261
	2.2049					0.670335
	2.62006					0.796553
	2.26669					0.68912
	1.92445					0.585072
	1.2366					0.375953
	1.60699					0.488559
	2.06998					0.629318
	1.69641					0.515743
	2.16573					0.658427
	2.9182					0.887193
	1.62044					0.492648
	2.32898					0.708058
	1.87429					0.569824
	2.9281					0.890204
	2.84979					0.866396
	2.16008					0.656708
	3.36822					1.02401
	2.00398					0.60925
	2.98337					0.907007
	3.12434					0.949864
	2.55099					0.775555
	2.49518					0.758588
	2.43979					0.741746
	2.53878					0.771843
	2.23541					0.67961
	2.67613					0.813599
	1.70654					0.518824
	2.38594					0.725376
	2.61219					0.79416
	2.30984					0.702241
	2.86183					0.870056
	2.79111					0.848555
	2.6681					0.811157
	2.61887					0.796191
	2.13148					0.648014
	2.30621					0.701135
	2.6268					0.798601
	2.51014					0.763134
	2.38622					0.725462
	2.81445					0.85565
	2.25744					0.686309
	2.2498					0.683986
	2.32243					0.706067
	1.97395					0.600121
	3.04196					0.924818
	2.32793					0.707739
	2.28768					0.695502
	2.47973					0.753888
	2.14927					0.653424
	2.42423					0.737017
	3.03533					0.922804
	2.7241					0.828183
	1.74557					0.53069
	2.77991					0.845149
	2.47516					0.752499
	2.68841					0.817332
	2.86231					0.870202
	2.50282					0.760908
	2.61655					0.795485
	2.20843					0.671408
	1.97626					0.600823
	2.40963					0.732577
	2.68862					0.817398
	2.06515					0.627849
	2.70119					0.821218
	2.42063					0.735923
	2.67748					0.814009
	2.62113					0.796878
	1.87893					0.571234
	2.44831					0.744338
	2.38435					0.724893
	2.0974					0.637653
	2.5013					0.760446
	2.99341					0.910058
	3.21611					0.977764
	2.61044					0.793629
	5.23803					1.59247
	5.00421					1.52138
	5.16311					1.56969
	4.51769					1.37347
	5.17614					1.57365
	4.11035					1.24963
	4.40132					1.33809
	4.8574					1.47675
	3.31616					1.00818
	4.41841					1.34329
	4.36109					1.32586
	4.59447					1.39682
	4.98115					1.51437
	5.83676					1.7745
	4.09517					1.24502
	3.77136					1.14657
	4.11917					1.25231
	4.54887					1.38295
	3.96568					1.20565
	4.54939					1.38311
	5.03918					1.53201
	4.40848					1.34027
	4.95822					1.5074
	4.36436					1.32686
	3.57026					1.08543
	2.25701					0.686179
	3.73705					1.13614
	5.31978					1.61732
	5.42055					1.64796
	5.61536					1.70719
	2.54012					0.772251
	4.49611					1.36691
	4.5285					1.37676
	3.81979					1.1613
	4.84622					1.47335
	4.3106					1.31051
	5.12156					1.55706
	3.76333					1.14413
	5.89964					1.79361
	3.90527					1.18728
	4.00008					1.21611
	3.13249					0.952343
	3.5309					1.07347
	5.81114					1.76671
	4.08425					1.2417
	7.49902					2.27986
	4.93008					1.49885
	4.39587					1.33643
	4.22005					1.28298
	2.61286					0.794363
	2.34809					0.713867
	3.07718					0.935528
	1.90078					0.577876
	1.85333					0.563451
	2.1118					0.642031
	2.59194					0.788002
	2.97284					0.903804
	2.9207					0.887955
	2.15902					0.656388
	2.59928					0.790237
	2.86036					0.869609
	2.21314					0.672841
	1.94195					0.590392
	2.39843					0.729172
	2.86331					0.870507
	2.05004					0.623254
	2.1531					0.654586
	2.40408					0.730889
	2.5542					0.776531
	2.6757					0.813469
	2.03706					0.619308
	2.6596					0.808573
	2.44821					0.744306
	1.97144					0.59936
	2.63824					0.802081
	2.42063					0.735921
	2.33692					0.710471
	2.64994					0.805636
	2.1009					0.638716
	3.34425					1.01672
	2.71053					0.824058
	3.14788					0.957021
	2.9742					0.904218
	2.36701					0.719621
	2.24057					0.68118
	2.34798					0.713836
	2.65199					0.80626
	2.87973					0.875497
	2.80622					0.853149
	2.98663					0.907997
	2.68392					0.815967
	2.42259					0.736519
	2.38063					0.72376
	2.45282					0.745707
	1.88757					0.57386
	2.72714					0.829106
	2.10886					0.641138
	2.51848					0.76567
	2.64561					0.80432
	2.20228					0.669539
	2.43915					0.741552
	2.1161					0.643339
	2.30221					0.699921
	2.36359					0.71858
	2.01106					0.611405
	1.91268					0.581494
	2.17991					0.662738
	2.59435					0.788737
	1.99552					0.606678
	2.27126					0.690511
	2.47409					0.752176
	2.29664					0.698227
	2.17367					0.660841
	2.59894					0.790131
	2.82676					0.859393
	2.11874					0.64414
	2.84049					0.863568
	2.2218					0.675475
	2.63591					0.801372
	2.06251					0.627047
	2.52155					0.766604
	2.57703					0.783471
	3.26319					0.992077
	2.08096					0.632654
	2.43783					0.741152
	1.82424					0.554608
	1.85732					0.564663
	1.98589					0.60375
	2.2798					0.693108
	2.32997					0.708359
	2.4346					0.740169
	2.50169					0.760565
	2.26717					0.689267
	1.96927					0.598699
	2.69962					0.820742
	1.73023					0.526025
	2.32958					0.70824
	2.28943					0.696035
	2.51409					0.764335
	2.47117					0.751287
	2.79795					0.850633
	2.04896					0.622928
	1.90313					0.578592
	2.3658					0.719252
	2.14551					0.652278
	2.458					0.747282
	2.47186					0.751497
	1.88305					0.572487
	1.70492					0.518332
	2.06478					0.627736
	2.11129					0.641876
	2.10102					0.638752
	1.80937					0.550087
	1.65422					0.502918
	1.44637					0.439726
	2.01391					0.612271
	2.24928					0.683826

[truncated: 1 more sheets: CombinedGRAPHS mCherryGFP_]
