# Supplementary material for: Centromere protection requires strict mitotic inactivation of the Bloom syndrome helicase complex
Source: Research Square preprint supplement (doi:10.21203/rs.3.rs-4420374/v1), 2024-05-30
Supplement: Supplementary file 19 [file Fig 3D. HeLa EGFP-TOP3A_CENmCBLMQ_WT vs 7A_intensity.xlsx]

## Sheet: Fig 3D Average per cell
	HeLa EGFP-TOP3A CENPB-mCherry-BLM(Q672R)_WT vs 7A
	Wildtype				7A (S17A, T20A, S26A, S28A, S33A, T36A, S1417A)
	EGFP-TOP3A	mCh-BLM	Ratio		EGFP-TOP3A	mCh-BLM	Ratio
	95.0148	445.99	0.213042		837.324	2470.2	0.338971
	203.74	422.152	0.482623		475.47	783.346	0.606973
	36.1852	796.386	0.0454367		308.627	954.975	0.323178
	329.182	509.534	0.646045		3036	1311.96	2.31409
	300.307	350.374	0.857104		1328.32	2111.75	0.629013
	290.167	474.415	0.61163		2567.18	2853.77	0.899574
	209.122	635.883	0.328869		2832.49	947.564	2.98923
	384.785	2368.77	0.162441		2366.22	5587.49	0.423486
	140.883	240.418	0.585992		562.083	239.341	2.34846
	496.295	469.007	1.05818		1759.87	2097	0.839234
	152.979	1900.72	0.0804848		3360.76	1741.35	1.92997
	73.3624	250.467	0.292902		2228.96	1936.89	1.15079
	120.074	400.53	0.299788		863.832	722.817	1.19509
	389.035	558.974	0.695982		825.529	807.91	1.02181
	290.875	2372.91	0.122582		1876.9	968.788	1.93737
	268.153	933.531	0.287245		2117.65	1759.25	1.20372
	731.269	2299.45	0.318019		296.771	1780.87	0.166643
	1322.17	2858.21	0.462586		412.816	1976.47	0.208865
	84.2383	163.429	0.515444		362.782	677.471	0.535495
	96.059	411.382	0.233503		566.133	2487.69	0.227574
	91.1695	775.071	0.117627		573.961	1736.17	0.33059
	210.957	1333.03	0.158254		6020.46	3036.87	1.98245
	127.179	494.631	0.25712		958.06	1699.1	0.563864
	165.504	391.542	0.422697		504.328	2604.45	0.193641
	375.641	1196.79	0.313873		937.777	776.734	1.20733
	329.423	1430.83	0.230232		721.751	2015.79	0.35805
	284.838	1077.63	0.264317		896.461	2339.63	0.383164
	161.684	301.272	0.536671		1449.72	2061.66	0.703184
	464.28	1461.35	0.317706		1452.97	2129.23	0.682393
	120.81	407.036	0.296804		1826.95	3110.28	0.58739
	63.2954	2173.94	0.0291156		696.286	486.866	1.43014
	64.6284	1355.9	0.0476644		610.339	894.689	0.68218
	144.529	788.906	0.183202		359.578	269.506	1.33421
	134.945	740.667	0.182193		2001.57	909.339	2.20113
	171.273	2257.66	0.075863		612.877	686.643	0.89257
	252.91	620.511	0.407584		811.363	319.992	2.53557
	32.4003	270.228	0.1199		874.201	859.707	1.01686
	638.277	908.526	0.70254		465.202	853.779	0.544874
	309.274	801.813	0.385718
	134.717	2074.14	0.0649508
	24.4903	1779.65	0.0137612
	139.811	2588.84	0.0540052
	256.144	1952.43	0.131192

## Sheet: WT metaphase
	HeLa EGFP-TOP3A CENPB-mCherry-BLM(Q672R)_WT vs 7A
	Wildtype
	Metaphase	Image 01		Image 02		Image 04		Image 05		Image 07		Image 08		Image 10		Image 11		Image 12		Image 14		Image 15		Image 16		Image 17		Image 18		Image 19		Image 20		Image 21a		Image 21b		Image 22		Image 23		Image 25		Image 27		Image 28		Image 30
		EGFP-TOP3A	mCh-BLM	EGFP-TOP3A	mCh-BLM	EGFP-TOP3A	mCh-BLM	EGFP-TOP3A	mCh-BLM	EGFP-TOP3A	mCh-BLM	EGFP-TOP3A	mCh-BLM	EGFP-TOP3A	mCh-BLM	EGFP-TOP3A	mCh-BLM	EGFP-TOP3A	mCh-BLM	EGFP-TOP3A	mCh-BLM	EGFP-TOP3A	mCh-BLM	EGFP-TOP3A	mCh-BLM	EGFP-TOP3A	mCh-BLM	EGFP-TOP3A	mCh-BLM	EGFP-TOP3A	mCh-BLM	EGFP-TOP3A	mCh-BLM	EGFP-TOP3A	mCh-BLM	EGFP-TOP3A	mCh-BLM	EGFP-TOP3A	mCh-BLM	EGFP-TOP3A	mCh-BLM	EGFP-TOP3A	mCh-BLM	EGFP-TOP3A	mCh-BLM	EGFP-TOP3A	mCh-BLM	EGFP-TOP3A	mCh-BLM
	Background	2838.21	540.308	2254.6	620.66	21939.8	604.517	5292.87	749.816	9397	516.875	3011.59	887.968	2160.77	931.441	3035.43	1670.36	3079.19	692.063	4574.22	778.145	2189.17	2289.61	5730.4	696.387	2481.08	698.413	10912.3	899.384	3036.41	3210.48	5256.08	1143.49	8157	3878.77	9283.54	5900.38	2192.06	738.361	2395.13	778.59	2412.44	932.671	4322.87	1137.53	3214.6	810.542	4298.78	700.056
	1	2768.91	868.967	2313.09	1001.16	17719.4	1707.25	5079.76	1502.36	9248	821	2994	1206	2225.35	1814.88	3404.25	5362.52	2861	876	4506.39	1402.35	2398.41	4023.47	5281.11	950.919	2488	1155	11561.3	1314.39	3219.62	6432.79	5597.4	2038.66	8339.13	6033.54	10032.7	9068.42	2256.01	984.848	2475.18	1310.43	2526.28	1811.32	4250.4	2500.1	3266.23	1329	4380.34	1322.35
	2	2673	835	2414.07	1096.77	17467	1479	5524.87	1490.75	9176.53	829.348	2957	1224	2244.99	1583.91	3211.59	3882.46	3162.15	915.204	4984.75	1859.45	2318.71	4067.29	5831.41	957.703	2527.94	1262.62	10166.8	1412.5	3446	5483	5723.84	2313.72	7900.03	5264.01	9002.32	8896.48	2258	926	2305	1155	2458.03	1558.62	4247.85	2467.51	3032.76	1167.17	4296.25	1295.5
	3	2660.5	847.25	2491.12	1206	19392.6	1845.27	5010	1333	9521.87	868.808	3095.64	1294.7	2216.48	1343.19	3286	3822	3220	993.963	4678	1286	2211.87	3360.15	5250	854	2498.41	927.352	10875.4	1175.6	3245.45	5531.19	5462.46	1908.36	8593.5	6052.8	9584.03	8288.06	2246	924	2380.02	1231.13	2467	1561	4386.86	2563.13	3260	1226	4184	1143
	4	2785.5	840	2216	898	18397	1643	4724	1305	9779.41	898.159	3393.89	1527.87	2299.76	1516.75	3531.54	4615.65	3059.68	914.409	5123	1307	2322.52	3880.68	5403.2	883.222	2585.41	1139.46	10196	1434	3356	5537.2	5940.52	2735	9501.11	7663.21	11019.6	10250.5	2284.31	888.17	2340	1136	2453	1564	4350.39	2796.08	3055.64	1271.69	4274.72	1285.51
	5	2939	918	2405	900	17582.9	1222.96	5930.5	1292	9218	793	3193	1364	2307.36	1384.37	3350.32	4030.69	2953	919.333	5058.17	1360.77	2417.2	4378.1	5949	908	2349	1060	11049.2	1497.9	2880.45	4705.5	5649.85	1947.57	8496.8	5051.14	8845.62	8440.59	2279.88	1050.74	2498	1295	2545.8	1792.24	4479.3	2134.15	3221.95	1426.59	4523.85	1182.2
	6	3004.46	936.371	2527.89	1157.55	18897	1587.83	5911.25	1659.13	9031.1	842.067	3236	1365	2400.23	1691.75	3450.6	4571.01	3214	883	5234.25	1454.11	2223	3154	5449	868	2524.39	1147.94	11414.2	1460.19	2940.85	4465.43	5004.12	2199.32	9647.39	7540.19	10898.6	8114.05	2298	915	2482	1065	2478	1642	4385.63	2320.14	2962	1226	4488	1052
	7	2843	895	2490	1002	20433	1841.54	5576.27	1168.91	9441.5	794.731	3233	1371	2355.82	2064.21	3410.76	4590.04	3043.29	898	4849.26	1023.23	2216	3112	5856	860	2565.38	1052.06	11311	1264.15	3269.93	5559.4	5439.01	2665.99	9658	6548	10832	7207	2288.99	936.619	2585.63	1164.47	2469	1586.5	4387	2326	2917	1171	4145.74	991.524
	8	2912.95	1153.37	2346	967	19800	1537	5243	1284	9406	816	3114	1371	2431.21	1458.68	3281.93	3627.41	3047	911	5031.17	1457.39	2406.02	4608.72	5718	837.5	2517.5	903	10994	1404	3171.12	5339.52	5600	2471	8765.82	5817.88	11223.1	8729.56	2333	973.5	2551.7	1130.84	2611.82	1970.74	4474.15	2516.69	3436.75	1357.92	3847.86	1065.08
	9	2854	1010	2525.59	1035.24	20135.7	1420.02	4715.97	1154.21	9116	781	3126	1374	2214.53	1580.26	3504.5	3970.5	3203.53	890.795	4945	1296	2390	4002	5758.67	841.333	2575.5	1001	11280.3	1412	2951	4275	5488	2080	8932.89	5289.94	11282.6	9131.07	2308	984	2456	1176	2501.56	1542.2	4262	1979.5	3481.16	1625.54	4417.5	1132.14
	10	2854	1015	2562.5	1071	20473	1565	5323.06	1238.75	9808	806	3307	1373	2374	1489	3345.82	3805.31	3200.19	941.081	4809	1298	2440.42	4669.82	5918	831	2738	1160	10686	1416	3437.33	6498.37	5940	1932	9436.04	6140.18	10576.9	7855.84	2342	995	2564.03	1516.66	2513.65	1441.46	4688	2121	3476.69	1512.47	4895	1030
	11	2939	967	2490	1047	20387	1570	5384.73	1307.27	9794.03	861.034	3274.56	1255.06	2427	1516.05	3367.66	3643.78	3248	893	5109.69	1392.73	2417.44	3735.1	5905.44	865.529	2620.95	1298.81	11523.1	1494.67	3188.63	5912.37	5621.76	1819.07	9357.91	6148.89	11386	11674.3	2391	978	2478.81	1304.55	2565.18	1796.91	4279	2155	3331.04	1369.06	4658.12	1144.57
	12	2971.61	1138.53	2488	1052	21507.1	1860.94	5850.2	1679.41	9152	766	3447.79	1334.68	2429	1265	3609.81	4051.31	3093.5	900.5	5097.5	1347	2417.8	5640.73	6027	836	2578	1159	11881.3	1843.06	3365.01	6635.5	4660.46	1882.04	8549.25	5969.89	10962	8167	2219.67	846.667	2595.64	1263.72	2591.91	2066.44	4761.11	2848.08	3042	1225	4565	1058
	13	2825	1001	2485.92	1275.95	21579.9	1592.28	5708.33	1063	9879	817	3451	1458	2447.49	1588.66	3217.04	3642.25	3162	891	5449.11	1448.16	2337.2	4414.09	5755	830	2620.69	960.205	11640.1	1537.4	3192	5720	5725.73	2387.01	9117	6861.19	11426.8	8067.93	2152	975	2470	1193	2522	1825	4743.25	2790.75	3233	1309	3892	991
	14	2960.21	1015.01	2474	1052	21474	1581	5384.58	1310.35	9341	807	3328.59	1627.72	2394	1294	3426.82	4015.9	3310.51	1023.59	4812.02	1106.61	2247.55	4022.6	6079.51	1127.7	2603.13	1133.88	11615	1611	3623.6	8051.58	5855	2164	9142	5435	9987.16	7503.92	2229	874	2538.89	1148.31	2457.5	1660	4732	2844	3361	1264	4546	1034
	15	2974	1039	2456	1053	21452	1567	5744	1056	9362	780	3482.15	1410.44	2501	1493	3563.88	3364.48	3269	951	4901.69	1238.09	2446.75	4342.14	6004	844	2599	940	11182.3	1577.35	3267.02	5107.97	5183.53	1802.6	8479.23	5306.73	11447.4	9680.18	2353.67	831.333	2475	1187	2543	1812	4370.08	2213.38	3253	1311	4411.43	1119.26
	16	3001.66	1095.56	2447	987	21362.5	1576	5899.26	1566.49	9367	807	3539.85	1539.45	2443.29	1781.3	3678.02	4651.28	3293	901	4719	1047	2419.77	4312.63	4775.21	1002.31	2519	918	11731	1222	3565.53	7791.41	5728	1696	9092.31	7881.14	11338.2	7724.56	2270	903	2540.95	1289.29	2458	1662	4228.61	2217.03	3156.42	1491.35	4122.79	1026.5
	17	3125	1040	2515.79	1225.1	21745	1596	6182	1324	9458.17	818.866	3321.12	1285.46	2341.39	1542.47	3302	3471.88	3420	961	4994	1081	2265.2	4576.6	5467.96	853.681	2695.89	1383.86	11621.9	1298.94	3303.93	6181.31	4822.24	1972.2	8633.64	6202.55	11247	6900	2248.73	875.598	2559	1172	2472	1800	4331.18	2705.23	3325	1289	4456.04	1128.86
	18	3013.5	1036	2410	1008	21333.1	1149.2	5558.68	1331.9	7997	823	3605.47	1616.56	2295.76	1666.46	3546.02	4052.01	3117	897.5	4704	1053.5	2365.64	5438.33	4746	942.5	2422.61	1329.56	11340	1237	3416.8	5599.24	5484.5	1990.6	8588.31	6017.97	11158.2	10144.7	2296	886	2558	1184	2454	1699	4627	2226	3129.76	1262.47	4393	1073
	19	2870.5	923.5	2500	932	22001.2	1310.87	5471	1200	7991.94	837.6	3287	1489	2616	1559	3539.2	4026.6	3110.67	972	4857.95	1114.53	2420.98	4430.77	5671.14	976.76	2682.33	1297.21	11261.4	1438.7	3059	4565	5150	1688	8389.84	6161.97	10390	9071	2247	876	2513	1062	2474.73	1512.46	4679.39	2509.1	2943.67	1238.6	4235.5	1215.33
	20	2967	1043.5	2340.39	1117.91	20565.5	1134.08	5614.67	1233	9195	856	3584	1456	2493.46	1895.81	3472.94	3678	3213.32	1018.4	5342.12	1072.83	2364.08	4298.99	4726	971	2541	1185	11142	1576	3326.38	4755.11	5685	1800			10609.6	8904	2254.33	875	2539.66	1178.33	2499.3	1623.45	4769	2439.22	3399	1439	4570	1010.5
	21	3024	979	2498.57	1097.86	21657.3	1123.48	5836	1270	9447.81	920.905	3360	1452	2364.08	1796.04	3799.39	4692.23	3126.58	1000.56	4589.72	1281.35	2448.74	5115.4	5183.64	961.553	2647.06	1095.24	11528.6	1756.69	3456.53	5956.89	5113.03	1692.46			10883.3	9358.03	2226	866	2560.15	1332.83	2554.64	1617.39	4495	2080	3418	1403.5	4223	1018
	22	3020	1052	2581.61	1253.34	21881	1591	5838	1272	9872	817	3630.79	1550.95	2421.86	1558.57	3652.43	3214.4	3314.67	1022.58	5456.38	1276.2	2441.58	5716.24	5572	828	2779	1011	11744.3	1324.75	3427.57	6476.53	5421	1801			9418.04	7446.84	2315	872.5	2592	1264	2597	1686	4530.8	2528.7	2897	1171	4346	1044
	23	2950.2	1005.64	2459	970	22520.6	1711.06	5822.05	1213.28	10145	818	3275.17	1105.5	2457.05	1313.78	3254.1	3557.2	3246	943	4972.94	1108.54	2379.59	4200.62	5648	923	2604.68	1127.72	11699	1232	3495.95	5125	5426.87	2398.8			10658.1	11269.1	2307.54	987.466	2447.54	1125.42	2594.63	1871.51	4558.87	2620.92	3371	1437	4721.94	1278.74
	24	2888	932	2433.64	1101.95	21301	1461	5940.89	1520.35	10093.3	878.227	3311	1111.75	2273.36	1304.64	3153.96	4085.65	3234.78	996.8	4749	1036	2276.07	3361.44	5951	913	2742.27	1125.34	11090	1577	3209.67	5510.67	5098.65	2463.03			9608.47	8313.26	2338.1	922.144	2425	1218	2503.89	1662	4780.7	3411.44	3390	1316	4573	1046
	25	3054	1061	2527.5	1077.5	20968.5	1147.55	5784.61	1220.39	9916	896.5	3315.5	1074.25	2446	1209	3256	3505	3163	963	4723	1044	2382	4044	5801.5	941.5	2578	1021	11546.9	1712.79	3519.55	5260							2343	884	2541.89	1276.57	2526.35	1849.36	4554.25	2325.75	3537	1363	4552.26	1095.7
	26	3005	928	2437	1096	21572.1	1712.66	5450	1145	10106.3	955.071	3315	1123.5	2434.28	1820.43	3415.39	3829.59	3054	984	4743	1029	2426	4246	5275	920	2763.57	1051.1	11032	1515	3470.55	6484.79							2330	953	2546	1182	2534	1738	4798.05	2892.33	3528	1331	4648.67	988
	27	2918	928	2544.73	1207.51	22161.1	1615.79	5420	1126	9882	920	3442.25	1436.62	2288	1567	3278.37	3820.37	3084	942	4833	1038.83	2359.79	4135.14	6020.71	1326.02	2618	1006.5	10965	1508	3400.8	5932.6							2293.5	869.5	2549	1178	2500.52	1610.29	4573.6	2747.92	3498.67	1351.67	4356.68	1097.57
	28	2961	917	2420.62	977.055	21891	1445	5626	1110	9254	787	3182	1102	2426.5	1907.03	3596.17	3085.65	3171.79	965	4709.33	1051.33	2406	4104	5387.23	1152.65	2625.76	1049.21	11051.5	1516.5	3680.13	6307.4							2193	857	2502.18	1214.57	2536.31	1630.68	4726.81	2413.72	2980	1269	4525	1218
	29	3033.5	949.5	2579	1095	22463	1440	5170.8	1167.78	9913.48	982.673	3181	1102	2248.42	1563.27	3317.45	4365.83	3329	962	5595	1170	2299.24	3826.65	5975	919	2663.59	1050.66	11287	1558	3663.85	7085.31							2303	877	2537	1155	2538.03	1651.65	4740	2456	3466	1338	4474	1045
	30	3106.27	909.784	2436	1087	22478	1468	5703	1119	9556	880	3412.78	1470.11	2393.15	1526.3	3301	3661	3274.92	958.385	5634.84	1401.49	2377	4103	6046.7	1175.06	2847.4	1103.75	11109.7	1468.85	3371.98	5740.4							2342	867	2547	1147	2475.35	2089.83	4289.72	2042.4	3475	1264	4718	1190
	31	3032.32	948.624	2492	1070	21937.3	1688.93	5997	1143	9703.25	893	3394	1379	2318.53	1784.64	3687.47	4986.15	3269.97	986.532	5181.15	1262.49	2305.1	4095.22	6390	1068	2670.16	1086.63	11577	1810.29	3419.73	5061.79							2302	876.5	2434	1125	2424.78	1848.57	4689	2396	3007.8	1318.73	4825	1207
	32	3042	955	2557	1080	20134.7	1341.03	5906	1185	9365	866	3395	1385	2289	1315	3444.66	3988.33	3338	952	5389	1147	2367.92	4506.66	4837.38	1121.08	2582.45	1145.17	11532.6	1637.37	3471.77	6686.68							2353	952	2440.86	1364.7	2391	1779			3302	1271	4781	1007
	33	2858	892	2369	911	22275	1464	6043	1150	9564	789	3174	1360	2387.93	1527.2	3339.19	3418.12	3221	966	5220	1125	2465.6	4823	5477.92	910.077	2681	1026	11209	1344	3269.21	5594.04							2251	889	2517.5	1130	2472.07	1825.84			3068	1187	4315.39	1042.24
	34	2871.72	1044.73	2516	1095	22003	1417	5816	1302	9678	821	3405.28	1874.13			3294.3	3670.16	3258	947	5512.52	1222.09	2279.98	3694.52	5562	897	2751.58	1173.68	11412	1432.45	3540.27	7272.25							2219	883	2464.97	1228.04	2427	1578			3425.86	1245.58	4673	1012
	35	2794	1047	2466.8	1115.67	21526	1464	5517	1093	9572	779	3265.08	1176.52			3505.13	4601.4	3133	931	5052	1157	2387.98	4829.97	4516.39	982.311	2465	1059.5	11044	1475	3479.24	5900.11							2278	845	2390.2	1154.44	2650	1634			3672	1204	4680	1012
	36	3007	1048.5	2402	922	20708.3	1252.45	5588	1079	8621.21	886.518	3114.78	1276.31			3486.95	4329.4	3328	909	5352	1121	2386.9	4092.49	5490	866	2827	1079	11109.3	1255.34	3258.45	5067.61							2306.62	936.413	2479.89	1385.18	2380.67	1603			3504.92	1357.18	4523.68	1163.05
	37	3048	1037	2545	946	21617	1412	5588	1079	9544	877	3110.9	1493.98			3353.93	3839.14	3244	918	5290	1125	2318.65	4557.87	4698	1059	2662.06	1123.26	11335	1462	3232	4548							2395	835	2420.5	1017.5	2406	1584			3608	1203	4036.5	1074.09
	38	2822	963	2491.98	986.598	22258.3	1143.19	5514	1097	8980.25	959.5	3139	1354			3155.69	4423.59	3322	925.5	5480	1577.53	2375.61	4429.02	5033.86	1075.63	2544.97	999.692	11503	1335	3205.46	4732.32							2285.07	832.119	2505.33	1009					3298.25	1210	4544.89	1056.77
	39	2886	1020	2448	1070	20949.2	1434.59	5337.35	1265.74	10379	877					3418.37	3910.21	3088	946	5216.87	1348.67	2328.25	4154.42	4931	1040	2540	952	11390.4	1419.89	3306.08	5057.54							2395	872	2330	1004					3172.57	1149.24	4150	990
	40	2917	1018	2453.17	1010.02	21511	1067	5533.5	1329	9552.92	845.853					3253.83	3477.33	3284.87	980.92	4883.54	1120.42	2217.62	3485.05	5851	918	2508.23	1238.49	9755.95	1348.42	3198.15	4702.94							2282	871	2384.37	1076.3							4638	998
	41	2884.22	1141.33	2507.71	1034.64	21783	1041	5423.02	1247.3	8862	928					3586.69	5025.2	3325.19	994.792	5392.19	1470.43	2314.77	4019.13	5443.52	949.921	2605	1067	11467.5	1332.5	3236.75	4534.38							2380.26	911.103	2454	1059							4616	979.5
	42	2762.55	994.189	2464	1003	21786	1059			9107	937					3643.87	5590.7	3347	911	5485.32	1377.46	2313.75	4041.47	4946	1017	2531	1042	9105.21	1602.32	3276.21	4717.36							2324.32	964.47	2412.88	1169.53							4279.72	1102.88
	43	2904	1028	2416	1003	21414.4	1093.66			10012	859					3374.34	3731.01	3187	926	4948	1047	2261.07	4275.46	5648.45	1087.69	2581.14	1211.92			3185.56	4342.75							2290	905									4509	1013
	44	2792	1021	2434	1034	21614.5	1053			10141	892							3212.15	874.697	5527.38	1377.69	2335.21	4237.85	5863	844	2672.03	1135.12			3278.47	4366							2296	908									4271	1101
	45	2917.52	971.618	2354	1023	21727	1038			9368	807							3141	845	5143.18	1315	2279	3693	5810.99	888.139	2556	1101			3316.56	5235.21							2320	831									4167	1084
	46	2922	1044	2429	998	20233	1240			9151.65	1071.92							3162.06	861.556	5169.38	1214.38	2248.33	3516.5	6032	861	2539.44	1090.76			3122.14	4990.67							2265.89	872.43									4237	1107
	47	2806	902	2415	1006	21049.7	1292.11			9405	798							3126	881.667	5186.52	1348.88	2205	3496	6092	849	2485.31	1153.81											2255	976									4416	1017
	48			2485	923.75	19774	1390			9567	805							3048	893	5022	1192	2189.95	3867.35	4999.5	1034.5	2458	1056											2367.86	1047.82									4291	1084.5
	49			2591	912	21345.6	1203.85			10216	881							3276.15	941.868	5210	1295			4332.05	1029.32	2565	1038											2231	839									4393	1080
	50			2521.89	1141.13	21858	1134			10280	902							3399	846	5369.07	1473.05			5253	908	2467.68	1112.65											2339	839									4294	1127.5
	51			2324	905	20594.1	1225.3			10331	896							3491	959	5179	1350			4798.39	1007.18													2335	835
	52			2296.75	988.538	21089.9	1179.33			9414	808							3269.8	1013.55	5770	1316			5232.83	968.786													2271.33	998.48
	53					21613	1098			10307	903.5							3216.57	828.714	5454.15	1416.46			4724.07	886.786													2222.03	913.658
	54					20353	1253			9531.4	955.2							3231	952.5	5279	1324			5500	992													2401	946
	55					20388.2	1264			10190.5	910.579							3217	956	5201	1191			5562	906													2252	952
	56					21234.5	1490.14			10186	892							3244	881	5343	1187			5919	861													2243	917
	57					20642	1434			10412	837							3175	881	5028	1203			5456	1004													2190.83	930.449
	58					20899	1472			10499	905							3132.72	851.469	4265	997			5623	1043													2173	875
	59					20658.4	1146.54			9396.2	949							3177	884	4883.67	1293.19			5078	911													2072	877
	60					20850.5	1447			10060.3	889							3108	945	4409.24	1077.39			5551	989													2224	879
	61					20375.6	1381.94			9112.38	859.576							3116	928	5104.53	1427.42			5259	909													2152	890
	62					20527.3	1431.33			10155.5	843.5							3225	950	4654.52	1252.27			5951	870													2198.8	910.971
	63					20112	1431			10322	849							3229	967	4827.06	1254.59			4630	871.5													2314	847
	64					20922.5	1482			10004	860.5							3098	954	4691	1147			5256	929													2215	855
	65					20603.4	1686.56			8494.45	980.86							3305.4	957.8	4709.62	1229			5135.5	925													2233.54	887.349
	66					20889	1474			9445.12	917.22							3257.5	954					4432	918													2295.74	894.145
	67					19836.4	1082.93			9202.29	882.075							3179.83	960					4525.13	971.226													2245	853
	68					19506.8	1126.53			9156.21	1081.14							3358	939					4495	917													2268	856
	69					20925	1450											3155	826																			2163	860
	70					18809.5	1331.36											3290	944																			2191.37	923.145
	71					19236.7	1757.02											3180.5	937.5																			2143.5	857
	72					20219.3	1446.33											3589	940																			2184	876
	73					20274	1445											3422	935																			2167	857.5
	74					18271.6	1545.74											3300.85	1004.51																			2199	872
		0	0	0	0	0	0	0	0	0	0	0	0	0	0	0	0	0	0	0	0	0	0	0	0	0	0	0	0	0	0	0	0	0	0	0	0	0	0	0	0	0	0	0	0	0	0	0	0
	1	-69.3087	328.659	58.4877	380.499	-4220.4	1102.73	-213.108	752.546	-149	304.125	-17.5899	318.032	64.5841	883.44	368.817	3692.16	-218.195	183.937	-67.8299	624.206	209.236	1733.86	-449.295	254.532	6.9222	456.587	649.063	415.003	183.213	3222.31	341.32	895.17	182.131	2154.77	749.192	3168.04	63.9525	246.487	80.0465	531.843	113.836	878.653	-72.4668	1362.57	51.6321	518.453	81.562	622.295
	2	-165.215	294.692	159.467	476.114	-4472.83	874.483	232.007	740.932	-220.467	312.473	-54.5899	336.032	84.2283	652.467	176.156	2212.1	82.9532	223.14	410.537	1081.31	129.536	1777.69	101.003	261.317	46.8582	564.209	-745.534	513.116	409.588	2272.52	467.764	1170.24	-256.971	1385.23	-281.221	2996.1	65.94	187.639	-90.13	376.41	45.589	625.946	-75.0168	1329.97	-181.833	356.625	-2.52702	595.447
	3	-177.715	306.942	236.513	585.344	-2547.24	1240.75	-282.867	583.184	124.865	351.932	84.0544	406.737	55.7149	411.754	250.567	2151.64	140.805	301.9	103.784	507.855	22.6981	1070.54	-480.404	157.613	17.3284	228.938	-36.9009	276.216	209.035	2320.71	206.388	764.872	436.495	2174.02	300.49	2387.68	53.94	185.639	-15.1069	452.539	54.5571	628.329	63.9926	1425.6	45.4028	415.458	-114.776	442.944
	4	-52.7147	299.692	-38.6045	277.34	-3542.83	1038.48	-568.867	555.184	382.411	381.284	382.301	639.904	138.99	585.311	496.103	2945.29	-19.5131	222.346	548.784	528.855	133.352	1591.07	-327.204	186.836	104.332	441.05	-716.284	534.616	319.588	2326.72	684.447	1591.51	1344.11	3784.43	1736.06	4350.16	92.2513	149.809	-55.13	357.41	40.5571	631.329	27.5179	1658.55	-158.961	461.151	-24.0562	585.457
	5	100.785	377.692	150.395	279.34	-4356.97	618.443	637.633	542.184	-179	276.125	181.41	476.032	146.592	452.928	314.884	2360.33	-126.195	227.27	483.957	582.628	228.032	2088.49	218.596	211.613	-132.078	361.587	136.882	598.513	-155.967	1495.01	393.774	804.084	339.792	1172.37	-437.915	2540.21	87.8195	312.38	102.87	516.41	133.362	859.565	156.426	996.622	7.35642	616.048	225.078	482.145
	6	166.249	396.064	273.282	536.892	-3042.83	983.317	618.378	909.316	-365.9	325.191	224.41	477.032	239.465	760.308	415.163	2900.64	134.805	190.937	660.038	675.964	33.8276	864.393	-281.404	171.613	43.3151	449.527	501.907	560.802	-95.5616	1254.94	-251.955	1055.83	1490.39	3661.42	1615.05	2213.66	105.94	176.639	86.87	286.41	65.5571	709.329	62.7617	1182.61	-252.597	415.458	189.224	351.944
	7	4.78525	354.692	235.395	381.34	-1506.85	1237.03	283.403	419.097	44.5	277.855	221.41	483.032	195.057	1132.77	375.329	2919.68	-35.9092	205.937	275.045	245.082	26.8276	822.393	125.596	163.613	84.3068	353.648	398.672	364.769	233.521	2348.92	182.939	1522.5	1501	2669.23	1548.46	1306.62	96.9275	198.258	190.498	385.884	56.5571	653.829	64.1306	1188.47	-297.597	360.458	-153.035	291.468
	8	74.7339	613.067	91.3955	346.34	-2139.83	932.483	-49.8672	534.184	9	299.125	102.41	483.032	270.444	527.235	246.496	1957.05	-32.1949	218.937	456.952	679.241	216.843	2319.11	-12.4035	141.113	36.4222	204.587	81.7157	504.616	134.713	2129.03	343.924	1327.51	608.818	1939.1	1939.56	2829.17	140.94	235.139	156.568	352.247	199.374	1038.06	151.284	1379.16	222.153	547.381	-450.914	365.024
	9	15.7853	469.692	270.989	414.577	-1804.11	815.503	-576.894	404.391	-281	264.125	114.41	486.032	53.7688	648.822	469.067	2300.14	124.331	198.732	370.784	517.855	200.828	1712.39	28.2631	144.947	94.4222	302.587	368.049	512.616	-85.4125	1064.52	231.924	936.514	775.883	1411.16	1999.08	3230.69	115.94	245.639	60.87	397.41	89.1141	609.531	-60.8694	841.968	266.565	814.996	118.721	432.081
	10	15.7853	474.692	307.895	450.34	-1466.83	960.483	30.1928	488.938	411	289.125	295.41	485.032	213.235	557.559	310.389	2134.95	120.998	249.018	234.784	519.855	251.248	2380.21	187.596	134.613	256.922	461.587	-226.284	516.616	400.917	3287.88	683.924	788.514	1279.04	2261.41	1293.37	1955.46	149.94	256.639	168.903	738.069	101.212	508.785	365.131	983.468	262.089	701.929	596.224	329.944
	11	100.785	426.692	235.395	426.34	-1552.83	965.483	91.8661	557.45	397.034	344.159	262.97	367.092	266.235	584.607	332.227	1973.42	168.805	200.937	535.474	614.587	228.266	1445.5	175.039	169.142	139.868	600.401	610.808	595.286	152.219	2701.88	365.686	675.581	1200.91	2270.12	2102.44	5773.87	198.94	239.639	83.6821	525.956	152.734	864.235	-43.8694	1017.47	116.441	558.515	359.345	444.519
	12	133.399	598.226	233.395	431.34	-432.705	1256.42	557.332	929.589	-245	249.125	436.197	446.713	268.235	333.559	574.376	2380.95	14.3051	208.437	523.284	568.855	228.624	3351.12	296.596	139.613	96.9222	460.587	968.99	943.676	328.6	3425.02	-595.612	738.558	392.25	2091.11	1678.46	2266.62	27.6067	108.306	200.508	485.135	179.468	1133.77	438.237	1710.54	-172.597	414.458	266.224	357.944
	13	-13.2147	460.692	231.313	655.287	-359.9	987.762	415.466	313.184	482	300.125	439.41	570.032	286.73	657.219	181.608	1971.89	82.8051	198.937	874.896	670.01	148.032	2124.48	24.5965	133.613	139.615	261.792	727.846	638.021	155.588	2509.52	469.654	1243.52	959.998	2982.42	2143.25	2167.55	-40.06	236.639	74.87	414.41	109.557	892.329	420.381	1653.22	18.4028	498.458	-406.776	290.944
	14	121.997	474.707	219.395	431.34	-465.826	976.483	91.7122	560.529	-56	290.125	317.001	739.754	233.235	362.559	391.389	2345.54	231.32	331.531	237.808	328.464	58.3776	1732.99	349.11	431.309	122.048	435.47	702.716	711.616	587.19	4841.1	598.924	1020.51	984.997	1556.23	703.625	1603.54	36.94	135.639	143.756	369.717	45.0571	727.329	409.131	1706.47	146.403	453.458	247.224	333.944
	15	135.785	498.692	201.395	432.34	-487.826	962.483	451.133	306.184	-35	263.125	470.557	522.474	340.235	561.559	528.442	1694.12	189.805	258.937	327.473	459.949	257.579	2052.54	273.596	147.613	117.922	241.587	270.045	677.97	230.606	1897.49	-72.5501	659.11	322.223	1427.96	2163.89	3779.79	161.607	92.9723	79.87	408.41	130.557	879.329	47.2056	1075.85	38.4028	500.458	112.654	419.207
	16	163.445	555.256	192.395	366.34	-577.326	971.483	606.398	816.677	-30	290.125	528.264	651.481	282.527	849.855	642.591	2980.91	213.805	208.937	144.784	268.855	230.596	2023.02	-955.195	305.926	37.9222	219.587	818.716	322.616	529.114	4580.93	471.924	552.514	935.306	4002.37	2054.68	1824.17	77.94	164.639	145.817	510.7	45.5571	729.329	-94.2627	1079.5	-58.181	680.807	-175.983	326.44
	17	286.785	499.692	261.186	604.441	-194.826	991.483	889.133	574.184	61.1745	301.99	309.528	397.491	180.628	611.029	266.567	1801.51	340.805	268.937	419.784	302.855	76.0276	2286.99	-262.446	157.294	214.811	685.45	709.569	399.556	267.514	2970.83	-433.84	828.714	476.634	2323.78	1963.46	999.615	56.6665	137.237	163.87	393.41	59.5571	867.329	8.3116	1567.7	110.403	478.458	157.267	428.803
	18	175.285	495.692	155.395	387.34	-606.682	544.681	265.812	582.087	-1400	306.125	593.877	728.592	134.994	735.024	510.585	2381.65	37.8051	205.437	129.784	275.355	176.47	3148.73	-984.404	246.113	-58.471	631.142	427.716	337.616	380.392	2388.76	228.424	847.118	431.302	2139.2	1874.67	4244.3	103.94	147.639	162.87	405.41	41.5571	766.329	304.131	1088.47	-84.8391	451.926	94.2243	372.944
	19	32.2853	383.192	245.395	311.34	61.3671	706.354	178.133	450.184	-1405.06	320.725	275.41	601.032	455.235	627.559	503.767	2356.24	31.4717	279.937	283.731	336.381	231.812	2141.16	-59.2611	280.373	201.256	598.8	349.087	539.313	22.5875	1354.52	-106.076	544.514	232.837	2283.19	1106.46	3170.62	54.94	137.639	117.87	283.41	62.2904	579.788	356.524	1371.57	-270.927	428.062	-63.2757	515.278
	20	128.785	503.192	85.7868	497.253	-1374.28	529.567	321.799	483.184	-202	339.125	572.41	568.032	332.691	964.37	437.503	2007.64	134.127	326.332	767.9	294.69	174.908	2009.38	-1004.4	274.613	59.9222	486.587	229.716	676.616	289.966	1544.62	428.924	656.514	-8157	-3878.77	1326.06	3003.62	62.2733	136.639	144.53	399.736	86.862	690.781	446.128	1301.68	184.403	628.458	271.224	310.444
	21	185.785	438.692	243.962	477.204	-282.566	518.963	543.133	520.184	50.8056	404.03	348.41	564.032	203.314	864.598	763.959	3021.86	47.3884	308.492	15.5039	503.201	259.566	2825.8	-546.763	265.166	165.983	396.83	616.268	857.31	420.117	2746.4	-143.047	548.978	-8157	-3878.77	1599.8	3457.64	33.94	127.639	165.017	554.243	142.195	684.717	172.131	942.468	203.403	592.958	-75.7757	317.944
	22	181.785	511.692	327.001	632.675	-58.8264	986.483	545.133	522.184	475	300.125	619.196	662.981	261.092	627.131	616.995	1544.04	235.477	330.517	882.163	498.052	252.404	3426.63	-158.404	131.613	297.922	312.587	831.992	425.363	391.154	3266.05	164.924	657.514	-8157	-3878.77	134.502	1546.46	122.94	134.139	196.87	485.41	184.557	753.329	207.929	1391.17	-317.597	360.458	47.2243	343.944
	23	111.982	465.328	204.395	349.34	580.727	1106.54	529.179	463.464	748	301.125	263.577	217.532	296.289	382.344	218.667	1886.84	166.805	250.937	398.727	330.398	190.422	1911.01	-82.4035	226.613	123.603	429.309	786.716	332.616	459.54	1914.52	170.797	1255.31	-8157	-3878.77	1374.52	5368.68	115.477	249.105	52.4095	346.831	182.186	938.835	236.005	1483.39	156.403	626.458	423.164	578.68
	24	49.7853	391.692	179.038	481.29	-638.826	856.483	648.027	770.535	696.279	361.352	299.41	223.782	112.599	373.2	118.526	2415.28	155.588	304.737	174.784	257.855	86.8979	1071.83	220.596	216.613	261.196	426.926	177.716	677.616	173.254	2300.18	-157.426	1319.54	-8157	-3878.77	324.934	2412.87	146.036	183.783	29.87	439.41	91.446	729.329	457.827	2273.91	175.403	505.458	274.224	345.944
	25	215.785	520.692	272.895	456.84	-971.316	543.034	491.747	470.57	519	379.625	303.91	186.282	285.235	277.559	220.567	1834.64	83.8051	270.937	148.784	265.855	192.828	1754.39	71.0965	245.113	96.9222	322.587	634.579	813.411	483.137	2049.52	-5256.08	-1143.49	-8157	-3878.77	-9283.54	-5900.38	150.94	145.639	146.759	497.982	113.91	916.69	231.381	1188.22	322.403	552.458	253.488	395.646
	26	166.785	387.692	182.395	475.34	-367.774	1108.15	157.133	395.184	709.253	438.196	303.41	235.532	273.512	888.994	379.961	2159.22	-25.1949	291.937	168.784	250.855	236.828	1956.39	-455.404	223.613	282.492	352.684	119.716	615.616	434.138	3274.31	-5256.08	-1143.49	-8157	-3878.77	-9283.54	-5900.38	137.94	214.639	150.87	403.41	121.557	805.329	475.181	1754.8	313.403	520.458	349.891	287.944
	27	79.7853	387.692	290.122	586.847	221.242	1011.27	127.133	376.184	485	403.125	430.66	548.657	127.235	635.559	242.939	2150.01	4.80507	249.937	258.784	260.688	170.613	1845.54	290.306	629.631	136.922	308.087	52.7157	608.616	364.384	2722.12	-5256.08	-1143.49	-8157	-3878.77	-9283.54	-5900.38	101.44	131.139	153.87	399.41	88.0817	677.616	250.729	1610.38	284.069	541.125	57.9026	397.518
	28	122.785	376.692	166.015	356.395	-48.8264	840.483	333.133	360.184	-143	270.125	170.41	214.032	265.732	975.59	560.739	1415.28	92.5992	272.937	135.117	273.188	216.828	1814.39	-343.173	456.268	144.686	350.798	139.216	617.116	643.717	3096.92	-5256.08	-1143.49	-8157	-3878.77	-9283.54	-5900.38	0.939993	118.639	107.047	435.985	123.863	698.013	403.942	1276.19	-234.597	458.458	226.224	517.944
	29	195.285	409.192	324.395	474.34	523.174	835.483	-122.072	417.966	516.478	465.797	169.41	214.032	87.651	631.828	282.02	2695.46	249.805	269.937	1020.78	391.855	110.063	1537.04	244.596	222.613	182.51	352.242	374.716	658.616	627.434	3874.82	-5256.08	-1143.49	-8157	-3878.77	-9283.54	-5900.38	110.94	138.639	141.87	376.41	125.583	718.979	417.131	1318.47	251.403	527.458	175.224	344.944
	30	268.057	369.476	181.395	466.34	538.174	863.483	410.133	369.184	159	363.125	401.188	582.138	232.38	594.864	265.567	1990.64	195.728	266.321	1060.62	623.347	187.828	1813.39	316.294	478.671	366.322	405.334	197.394	569.467	335.571	2529.92	-5256.08	-1143.49	-8157	-3878.77	-9283.54	-5900.38	149.94	128.639	151.87	368.41	62.904	1157.16	-33.1541	904.868	260.403	453.458	419.224	489.944
	31	194.101	408.317	237.395	449.34	-2.55283	1084.42	704.133	393.184	306.25	376.125	382.41	491.032	157.766	853.198	652.034	3315.79	190.78	294.468	606.93	484.343	115.928	1805.61	659.596	371.613	189.085	388.213	664.678	910.903	383.322	1851.31	-5256.08	-1143.49	-8157	-3878.77	-9283.54	-5900.38	109.94	138.139	38.87	346.41	12.3349	915.904	366.131	1258.47	-206.8	508.19	526.224	506.944
	32	203.785	414.692	302.395	459.34	-1805.16	736.517	613.133	435.184	-32	349.125	383.41	497.032	128.235	383.559	409.223	2317.97	258.805	259.937	814.784	368.855	178.749	2217.06	-893.019	424.69	101.368	446.76	620.299	737.982	435.357	3476.2	-5256.08	-1143.49	-8157	-3878.77	-9283.54	-5900.38	160.94	213.639	45.7266	586.106	-21.4429	846.329	-4322.87	-1137.53	87.4028	460.458	482.224	306.944
	33	19.7853	351.692	114.395	290.34	335.174	859.483	750.133	400.184	167	272.125	162.41	472.032	227.165	595.763	303.759	1747.75	141.805	273.937	645.784	346.855	276.428	2533.39	-252.48	213.69	199.922	327.587	296.716	444.616	232.801	2383.56	-5256.08	-1143.49	-8157	-3878.77	-9283.54	-5900.38	58.94	150.639	122.37	351.41	59.6281	893.168	-4322.87	-1137.53	-146.597	376.458	16.6138	342.186
	34	33.5056	504.424	261.395	474.34	63.1736	812.483	523.133	552.184	281	304.125	393.687	986.162	-2160.77	-931.441	258.867	1999.79	178.805	254.937	938.299	443.947	90.8096	1404.92	-168.404	200.613	270.5	475.268	499.764	533.068	503.86	4061.76	-5256.08	-1143.49	-8157	-3878.77	-9283.54	-5900.38	26.94	144.639	69.8357	449.451	14.5571	645.329	-4322.87	-1137.53	211.266	435.037	374.224	311.944
	35	-44.2147	506.692	212.193	495.006	-413.826	859.483	224.133	343.184	175	262.125	253.487	288.551	-2160.77	-931.441	469.695	2931.04	53.8051	238.937	477.784	378.855	198.811	2540.36	-1214.01	285.925	-16.0778	361.087	131.716	575.616	442.824	2689.62	-5256.08	-1143.49	-8157	-3878.77	-9283.54	-5900.38	85.94	106.639	-4.93484	375.849	237.557	701.329	-4322.87	-1137.53	457.403	393.458	381.224	311.944
	36	168.785	508.192	147.395	301.34	-1231.48	647.932	295.133	329.184	-775.787	369.642	103.19	388.341	-2160.77	-931.441	451.514	2659.04	248.805	216.937	777.784	342.855	197.73	1802.88	-240.404	169.613	345.922	380.587	197.039	355.955	222.033	1857.12	-5256.08	-1143.49	-8157	-3878.77	-9283.54	-5900.38	114.56	198.052	84.7637	606.587	-31.7762	670.329	-4322.87	-1137.53	290.323	546.636	224.9	462.995
	37	209.785	496.692	290.395	325.34	-322.826	807.483	295.133	329.184	147	360.125	99.313	606.012	-2160.77	-931.441	318.499	2168.78	164.805	225.937	715.784	346.855	129.481	2268.27	-1032.4	362.613	180.987	424.845	422.716	562.616	195.588	1337.52	-5256.08	-1143.49	-8157	-3878.77	-9283.54	-5900.38	202.94	96.639	25.37	238.91	-6.4429	651.329	-4322.87	-1137.53	393.403	392.458	-262.276	374.037
	38	-16.2147	422.692	237.373	365.938	318.486	538.671	221.133	347.184	-416.75	442.625	127.41	466.032	-2160.77	-931.441	120.261	2753.23	242.805	233.437	905.779	799.38	186.436	2139.41	-696.546	379.24	63.8914	301.279	590.716	435.616	169.051	1521.83	-5256.08	-1143.49	-8157	-3878.77	-9283.54	-5900.38	93.0114	93.758	110.203	230.41	-2412.44	-932.671	-4322.87	-1137.53	83.6528	399.458	246.112	356.714
	39	47.7853	479.692	193.395	449.34	-990.632	830.076	44.4832	515.927	982	360.125	-3011.59	-887.968	-2160.77	-931.441	382.935	2239.85	8.80507	253.937	642.651	570.521	139.078	1864.81	-799.404	343.613	58.9222	253.587	478.101	520.506	269.667	1847.05	-5256.08	-1143.49	-8157	-3878.77	-9283.54	-5900.38	202.94	133.639	-65.13	225.41	-2412.44	-932.671	-4322.87	-1137.53	-42.0258	338.701	-148.776	289.944
	40	78.7853	477.692	198.568	389.359	-428.826	462.483	240.633	579.184	155.92	328.977	-3011.59	-887.968	-2160.77	-931.441	218.4	1806.97	205.679	288.857	309.32	342.275	28.4503	1195.45	120.596	221.613	27.1508	540.073	-1156.34	449.033	161.739	1492.45	-5256.08	-1143.49	-8157	-3878.77	-9283.54	-5900.38	89.94	132.639	-10.7615	297.708	-2412.44	-932.671	-4322.87	-1137.53	-3214.6	-810.542	339.224	297.944
	41	46.0041	601.023	253.107	413.984	-156.826	436.483	130.15	497.487	-535	411.125	-3011.59	-887.968	-2160.77	-931.441	551.259	3354.84	245.993	302.728	817.974	692.283	125.602	1729.52	-286.886	253.534	123.922	368.587	555.216	433.116	200.335	1323.9	-5256.08	-1143.49	-8157	-3878.77	-9283.54	-5900.38	188.199	172.742	58.87	280.41	-2412.44	-932.671	-4322.87	-1137.53	-3214.6	-810.542	317.224	279.444
	42	-75.6676	453.881	209.395	382.34	-153.826	454.483	-5292.87	-749.816	-290	420.125	-3011.59	-887.968	-2160.77	-931.441	608.439	3920.33	267.805	218.937	911.1	599.313	124.576	1751.86	-784.404	320.613	49.9222	343.587	-1807.07	702.94	239.802	1506.87	-5256.08	-1143.49	-8157	-3878.77	-9283.54	-5900.38	132.257	226.109	17.745	390.935	-2412.44	-932.671	-4322.87	-1137.53	-3214.6	-810.542	-19.0584	402.829
	43	65.7853	487.692	161.395	382.34	-525.426	489.141	-5292.87	-749.816	615	342.125	-3011.59	-887.968	-2160.77	-931.441	338.911	2060.65	107.805	233.937	373.784	268.855	71.8934	1985.85	-81.9541	391.299	100.059	513.509	-10912.3	-899.384	149.145	1132.27	-5256.08	-1143.49	-8157	-3878.77	-9283.54	-5900.38	97.94	166.639	-2395.13	-778.59	-2412.44	-932.671	-4322.87	-1137.53	-3214.6	-810.542	210.224	312.944
	44	-46.2147	480.692	179.395	413.34	-325.326	448.483	-5292.87	-749.816	744	375.125	-3011.59	-887.968	-2160.77	-931.441	-3035.43	-1670.36	132.957	182.634	953.164	599.545	146.033	1948.24	132.596	147.613	190.95	436.71	-10912.3	-899.384	242.054	1155.52	-5256.08	-1143.49	-8157	-3878.77	-9283.54	-5900.38	103.94	169.639	-2395.13	-778.59	-2412.44	-932.671	-4322.87	-1137.53	-3214.6	-810.542	-27.7757	400.944
	45	79.3031	431.31	99.3955	402.34	-212.826	433.483	-5292.87	-749.816	-29	290.125	-3011.59	-887.968	-2160.77	-931.441	-3035.43	-1670.36	61.8051	152.937	568.967	536.858	89.8276	1403.39	80.5858	191.752	74.9222	402.587	-10912.3	-899.384	280.149	2024.72	-5256.08	-1143.49	-8157	-3878.77	-9283.54	-5900.38	127.94	92.639	-2395.13	-778.59	-2412.44	-932.671	-4322.87	-1137.53	-3214.6	-810.542	-131.776	383.944
	46	83.7853	503.692	174.395	377.34	-1706.83	635.483	-5292.87	-749.816	-245.351	555.043	-3011.59	-887.968	-2160.77	-931.441	-3035.43	-1670.36	82.8606	169.492	595.159	436.23	59.1609	1226.89	301.596	164.613	58.3659	392.349	-10912.3	-899.384	85.7264	1780.18	-5256.08	-1143.49	-8157	-3878.77	-9283.54	-5900.38	73.8289	134.069	-2395.13	-778.59	-2412.44	-932.671	-4322.87	-1137.53	-3214.6	-810.542	-61.7757	406.944
	47	-32.2147	361.692	160.395	385.34	-890.176	687.595	-5292.87	-749.816	8	281.125	-3011.59	-887.968	-2160.77	-931.441	-3035.43	-1670.36	46.8051	189.603	612.309	570.73	15.8276	1206.39	361.596	152.613	4.22956	455.396	-10912.3	-899.384	-3036.41	-3210.48	-5256.08	-1143.49	-8157	-3878.77	-9283.54	-5900.38	62.94	237.639	-2395.13	-778.59	-2412.44	-932.671	-4322.87	-1137.53	-3214.6	-810.542	117.224	316.944
	48	-2838.21	-540.308	230.395	303.09	-2165.78	785.483	-5292.87	-749.816	170	288.125	-3011.59	-887.968	-2160.77	-931.441	-3035.43	-1670.36	-31.1949	200.937	447.784	413.855	0.780542	1577.75	-730.904	338.113	-23.0778	357.587	-10912.3	-899.384	-3036.41	-3210.48	-5256.08	-1143.49	-8157	-3878.77	-9283.54	-5900.38	175.803	309.46	-2395.13	-778.59	-2412.44	-932.671	-4322.87	-1137.53	-3214.6	-810.542	-7.7757	384.444
	49	-2838.21	-540.308	336.395	291.34	-594.19	599.332	-5292.87	-749.816	819	364.125	-3011.59	-887.968	-2160.77	-931.441	-3035.43	-1670.36	196.952	249.804	635.784	516.855	-2189.17	-2289.61	-1398.35	332.93	83.9222	339.587	-10912.3	-899.384	-3036.41	-3210.48	-5256.08	-1143.49	-8157	-3878.77	-9283.54	-5900.38	38.94	100.639	-2395.13	-778.59	-2412.44	-932.671	-4322.87	-1137.53	-3214.6	-810.542	94.2243	379.944
	50	-2838.21	-540.308	267.286	520.474	-81.8264	529.483	-5292.87	-749.816	883	385.125	-3011.59	-887.968	-2160.77	-931.441	-3035.43	-1670.36	319.805	153.937	794.854	694.902	-2189.17	-2289.61	-477.404	211.613	-13.3978	414.24	-10912.3	-899.384	-3036.41	-3210.48	-5256.08	-1143.49	-8157	-3878.77	-9283.54	-5900.38	146.94	100.639	-2395.13	-778.59	-2412.44	-932.671	-4322.87	-1137.53	-3214.6	-810.542	-4.7757	427.444
	51	-2838.21	-540.308	69.3955	284.34	-1345.7	620.788	-5292.87	-749.816	934	379.125	-3011.59	-887.968	-2160.77	-931.441	-3035.43	-1670.36	411.805	266.937	604.784	571.855	-2189.17	-2289.61	-932.016	310.797	-2481.08	-698.413	-10912.3	-899.384	-3036.41	-3210.48	-5256.08	-1143.49	-8157	-3878.77	-9283.54	-5900.38	142.94	96.639	-2395.13	-778.59	-2412.44	-932.671	-4322.87	-1137.53	-3214.6	-810.542	-4298.78	-700.056
	52	-2838.21	-540.308	42.1493	367.878	-849.887	574.813	-5292.87	-749.816	17	291.125	-3011.59	-887.968	-2160.77	-931.441	-3035.43	-1670.36	190.601	321.486	1195.78	537.855	-2189.17	-2289.61	-497.578	272.399	-2481.08	-698.413	-10912.3	-899.384	-3036.41	-3210.48	-5256.08	-1143.49	-8157	-3878.77	-9283.54	-5900.38	79.2733	260.119	-2395.13	-778.59	-2412.44	-932.671	-4322.87	-1137.53	-3214.6	-810.542	-4298.78	-700.056
	53	-2838.21	-540.308	-2254.6	-620.66	-326.826	493.483	-5292.87	-749.816	910	386.625	-3011.59	-887.968	-2160.77	-931.441	-3035.43	-1670.36	137.377	136.651	879.932	638.315	-2189.17	-2289.61	-1006.33	190.399	-2481.08	-698.413	-10912.3	-899.384	-3036.41	-3210.48	-5256.08	-1143.49	-8157	-3878.77	-9283.54	-5900.38	29.9663	175.297	-2395.13	-778.59	-2412.44	-932.671	-4322.87	-1137.53	-3214.6	-810.542	-4298.78	-700.056
	54	-2838.21	-540.308	-2254.6	-620.66	-1586.83	648.483	-5292.87	-749.816	134.4	438.325	-3011.59	-887.968	-2160.77	-931.441	-3035.43	-1670.36	151.805	260.437	704.784	545.855	-2189.17	-2289.61	-230.404	295.613	-2481.08	-698.413	-10912.3	-899.384	-3036.41	-3210.48	-5256.08	-1143.49	-8157	-3878.77	-9283.54	-5900.38	208.94	207.639	-2395.13	-778.59	-2412.44	-932.671	-4322.87	-1137.53	-3214.6	-810.542	-4298.78	-700.056
	55	-2838.21	-540.308	-2254.6	-620.66	-1551.58	659.483	-5292.87	-749.816	793.524	393.704	-3011.59	-887.968	-2160.77	-931.441	-3035.43	-1670.36	137.805	263.937	626.784	412.855	-2189.17	-2289.61	-168.404	209.613	-2481.08	-698.413	-10912.3	-899.384	-3036.41	-3210.48	-5256.08	-1143.49	-8157	-3878.77	-9283.54	-5900.38	59.94	213.639	-2395.13	-778.59	-2412.44	-932.671	-4322.87	-1137.53	-3214.6	-810.542	-4298.78	-700.056
	56	-2838.21	-540.308	-2254.6	-620.66	-705.35	885.626	-5292.87	-749.816	789	375.125	-3011.59	-887.968	-2160.77	-931.441	-3035.43	-1670.36	164.805	188.937	768.784	408.855	-2189.17	-2289.61	188.596	164.613	-2481.08	-698.413	-10912.3	-899.384	-3036.41	-3210.48	-5256.08	-1143.49	-8157	-3878.77	-9283.54	-5900.38	50.94	178.639	-2395.13	-778.59	-2412.44	-932.671	-4322.87	-1137.53	-3214.6	-810.542	-4298.78	-700.056
	57	-2838.21	-540.308	-2254.6	-620.66	-1297.83	829.483	-5292.87	-749.816	1015	320.125	-3011.59	-887.968	-2160.77	-931.441	-3035.43	-1670.36	95.8051	188.937	453.784	424.855	-2189.17	-2289.61	-274.404	307.613	-2481.08	-698.413	-10912.3	-899.384	-3036.41	-3210.48	-5256.08	-1143.49	-8157	-3878.77	-9283.54	-5900.38	-1.23007	192.088	-2395.13	-778.59	-2412.44	-932.671	-4322.87	-1137.53	-3214.6	-810.542	-4298.78	-700.056
	58	-2838.21	-540.308	-2254.6	-620.66	-1040.83	867.483	-5292.87	-749.816	1102	388.125	-3011.59	-887.968	-2160.77	-931.441	-3035.43	-1670.36	53.5238	159.405	-309.216	218.855	-2189.17	-2289.61	-107.404	346.613	-2481.08	-698.413	-10912.3	-899.384	-3036.41	-3210.48	-5256.08	-1143.49	-8157	-3878.77	-9283.54	-5900.38	-19.06	136.639	-2395.13	-778.59	-2412.44	-932.671	-4322.87	-1137.53	-3214.6	-810.542	-4298.78	-700.056
	59	-2838.21	-540.308	-2254.6	-620.66	-1281.48	542.024	-5292.87	-749.816	-0.8	432.125	-3011.59	-887.968	-2160.77	-931.441	-3035.43	-1670.36	97.8051	191.937	309.457	515.043	-2189.17	-2289.61	-652.404	214.613	-2481.08	-698.413	-10912.3	-899.384	-3036.41	-3210.48	-5256.08	-1143.49	-8157	-3878.77	-9283.54	-5900.38	-120.06	138.639	-2395.13	-778.59	-2412.44	-932.671	-4322.87	-1137.53	-3214.6	-810.542	-4298.78	-700.056
	60	-2838.21	-540.308	-2254.6	-620.66	-1089.33	842.483	-5292.87	-749.816	663.333	372.125	-3011.59	-887.968	-2160.77	-931.441	-3035.43	-1670.36	28.8051	252.937	-164.973	299.24	-2189.17	-2289.61	-179.404	292.613	-2481.08	-698.413	-10912.3	-899.384	-3036.41	-3210.48	-5256.08	-1143.49	-8157	-3878.77	-9283.54	-5900.38	31.94	140.639	-2395.13	-778.59	-2412.44	-932.671	-4322.87	-1137.53	-3214.6	-810.542	-4298.78	-700.056
	61	-2838.21	-540.308	-2254.6	-620.66	-1564.26	777.427	-5292.87	-749.816	-284.62	342.701	-3011.59	-887.968	-2160.77	-931.441	-3035.43	-1670.36	36.8051	235.937	530.316	649.272	-2189.17	-2289.61	-471.404	212.613	-2481.08	-698.413	-10912.3	-899.384	-3036.41	-3210.48	-5256.08	-1143.49	-8157	-3878.77	-9283.54	-5900.38	-40.06	151.639	-2395.13	-778.59	-2412.44	-932.671	-4322.87	-1137.53	-3214.6	-810.542	-4298.78	-700.056
	62	-2838.21	-540.308	-2254.6	-620.66	-1412.49	826.817	-5292.87	-749.816	758.5	326.625	-3011.59	-887.968	-2160.77	-931.441	-3035.43	-1670.36	145.805	257.937	80.3034	474.127	-2189.17	-2289.61	220.596	173.613	-2481.08	-698.413	-10912.3	-899.384	-3036.41	-3210.48	-5256.08	-1143.49	-8157	-3878.77	-9283.54	-5900.38	6.73999	172.61	-2395.13	-778.59	-2412.44	-932.671	-4322.87	-1137.53	-3214.6	-810.542	-4298.78	-700.056
	63	-2838.21	-540.308	-2254.6	-620.66	-1827.83	826.483	-5292.87	-749.816	925	332.125	-3011.59	-887.968	-2160.77	-931.441	-3035.43	-1670.36	149.805	274.937	252.843	476.443	-2189.17	-2289.61	-1100.4	175.113	-2481.08	-698.413	-10912.3	-899.384	-3036.41	-3210.48	-5256.08	-1143.49	-8157	-3878.77	-9283.54	-5900.38	121.94	108.639	-2395.13	-778.59	-2412.44	-932.671	-4322.87	-1137.53	-3214.6	-810.542	-4298.78	-700.056
	64	-2838.21	-540.308	-2254.6	-620.66	-1017.33	877.483	-5292.87	-749.816	607	343.625	-3011.59	-887.968	-2160.77	-931.441	-3035.43	-1670.36	18.8051	261.937	116.784	368.855	-2189.17	-2289.61	-474.404	232.613	-2481.08	-698.413	-10912.3	-899.384	-3036.41	-3210.48	-5256.08	-1143.49	-8157	-3878.77	-9283.54	-5900.38	22.94	116.639	-2395.13	-778.59	-2412.44	-932.671	-4322.87	-1137.53	-3214.6	-810.542	-4298.78	-700.056
	65	-2838.21	-540.308	-2254.6	-620.66	-1336.43	1082.04	-5292.87	-749.816	-902.55	463.984	-3011.59	-887.968	-2160.77	-931.441	-3035.43	-1670.36	226.205	265.737	135.406	450.855	-2189.17	-2289.61	-594.904	228.613	-2481.08	-698.413	-10912.3	-899.384	-3036.41	-3210.48	-5256.08	-1143.49	-8157	-3878.77	-9283.54	-5900.38	41.4822	148.988	-2395.13	-778.59	-2412.44	-932.671	-4322.87	-1137.53	-3214.6	-810.542	-4298.78	-700.056
	66	-2838.21	-540.308	-2254.6	-620.66	-1050.83	869.483	-5292.87	-749.816	48.1214	400.344	-3011.59	-887.968	-2160.77	-931.441	-3035.43	-1670.36	178.305	261.937	-4574.22	-778.145	-2189.17	-2289.61	-1298.4	221.613	-2481.08	-698.413	-10912.3	-899.384	-3036.41	-3210.48	-5256.08	-1143.49	-8157	-3878.77	-9283.54	-5900.38	103.682	155.784	-2395.13	-778.59	-2412.44	-932.671	-4322.87	-1137.53	-3214.6	-810.542	-4298.78	-700.056
	67	-2838.21	-540.308	-2254.6	-620.66	-2103.46	478.417	-5292.87	-749.816	-194.71	365.199	-3011.59	-887.968	-2160.77	-931.441	-3035.43	-1670.36	100.638	267.937	-4574.22	-778.145	-2189.17	-2289.61	-1205.27	274.839	-2481.08	-698.413	-10912.3	-899.384	-3036.41	-3210.48	-5256.08	-1143.49	-8157	-3878.77	-9283.54	-5900.38	52.94	114.639	-2395.13	-778.59	-2412.44	-932.671	-4322.87	-1137.53	-3214.6	-810.542	-4298.78	-700.056
	68	-2838.21	-540.308	-2254.6	-620.66	-2433.05	522.011	-5292.87	-749.816	-240.786	564.27	-3011.59	-887.968	-2160.77	-931.441	-3035.43	-1670.36	278.805	246.937	-4574.22	-778.145	-2189.17	-2289.61	-1235.4	220.613	-2481.08	-698.413	-10912.3	-899.384	-3036.41	-3210.48	-5256.08	-1143.49	-8157	-3878.77	-9283.54	-5900.38	75.94	117.639	-2395.13	-778.59	-2412.44	-932.671	-4322.87	-1137.53	-3214.6	-810.542	-4298.78	-700.056
	69	-2838.21	-540.308	-2254.6	-620.66	-1014.83	845.483	-5292.87	-749.816	-9397	-516.875	-3011.59	-887.968	-2160.77	-931.441	-3035.43	-1670.36	75.8051	133.937	-4574.22	-778.145	-2189.17	-2289.61	-5730.4	-696.387	-2481.08	-698.413	-10912.3	-899.384	-3036.41	-3210.48	-5256.08	-1143.49	-8157	-3878.77	-9283.54	-5900.38	-29.06	121.639	-2395.13	-778.59	-2412.44	-932.671	-4322.87	-1137.53	-3214.6	-810.542	-4298.78	-700.056
	70	-2838.21	-540.308	-2254.6	-620.66	-3130.36	726.842	-5292.87	-749.816	-9397	-516.875	-3011.59	-887.968	-2160.77	-931.441	-3035.43	-1670.36	210.805	251.937	-4574.22	-778.145	-2189.17	-2289.61	-5730.4	-696.387	-2481.08	-698.413	-10912.3	-899.384	-3036.41	-3210.48	-5256.08	-1143.49	-8157	-3878.77	-9283.54	-5900.38	-0.692485	184.784	-2395.13	-778.59	-2412.44	-932.671	-4322.87	-1137.53	-3214.6	-810.542	-4298.78	-700.056
	71	-2838.21	-540.308	-2254.6	-620.66	-2703.16	1152.5	-5292.87	-749.816	-9397	-516.875	-3011.59	-887.968	-2160.77	-931.441	-3035.43	-1670.36	101.305	245.437	-4574.22	-778.145	-2189.17	-2289.61	-5730.4	-696.387	-2481.08	-698.413	-10912.3	-899.384	-3036.41	-3210.48	-5256.08	-1143.49	-8157	-3878.77	-9283.54	-5900.38	-48.56	118.639	-2395.13	-778.59	-2412.44	-932.671	-4322.87	-1137.53	-3214.6	-810.542	-4298.78	-700.056
	72	-2838.21	-540.308	-2254.6	-620.66	-1720.49	841.817	-5292.87	-749.816	-9397	-516.875	-3011.59	-887.968	-2160.77	-931.441	-3035.43	-1670.36	509.805	247.937	-4574.22	-778.145	-2189.17	-2289.61	-5730.4	-696.387	-2481.08	-698.413	-10912.3	-899.384	-3036.41	-3210.48	-5256.08	-1143.49	-8157	-3878.77	-9283.54	-5900.38	-8.06001	137.639	-2395.13	-778.59	-2412.44	-932.671	-4322.87	-1137.53	-3214.6	-810.542	-4298.78	-700.056
	73	-2838.21	-540.308	-2254.6	-620.66	-1665.83	840.483	-5292.87	-749.816	-9397	-516.875	-3011.59	-887.968	-2160.77	-931.441	-3035.43	-1670.36	342.805	242.937	-4574.22	-778.145	-2189.17	-2289.61	-5730.4	-696.387	-2481.08	-698.413	-10912.3	-899.384	-3036.41	-3210.48	-5256.08	-1143.49	-8157	-3878.77	-9283.54	-5900.38	-25.06	119.139	-2395.13	-778.59	-2412.44	-932.671	-4322.87	-1137.53	-3214.6	-810.542	-4298.78	-700.056
	74	-2838.21	-540.308	-2254.6	-620.66	-3668.27	941.219	-5292.87	-749.816	-9397	-516.875	-3011.59	-887.968	-2160.77	-931.441	-3035.43	-1670.36	221.654	312.448	-4574.22	-778.145	-2189.17	-2289.61	-5730.4	-696.387	-2481.08	-698.413	-10912.3	-899.384	-3036.41	-3210.48	-5256.08	-1143.49	-8157	-3878.77	-9283.54	-5900.38	6.93999	133.639	-2395.13	-778.59	-2412.44	-932.671	-4322.87	-1137.53	-3214.6	-810.542	-4298.78	-700.056
	1	0	0	0	0	0	0	0	0	0	0	0	0	0	0	0	0	0	0	0	0	0	0	0	0	0	0	0	0	0	0	0	0	0	0	0	0	0	0	0	0	0	0	0	0	0	0	0	0
	2	0	328.659	58.4877	380.499	0	1102.73	0	752.546	0	304.125	0	318.032	64.5841	883.44	368.817	3692.16	0	183.937	0	624.206	209.236	1733.86	0	254.532	6.9222	456.587	649.063	415.003	183.213	3222.31	341.32	895.17	182.131	2154.77	749.192	3168.04	63.9525	246.487	80.0465	531.843	113.836	878.653	0	1362.57	51.6321	518.453	81.562	622.295
	3	0	294.692	159.467	476.114	0	874.483	232.007	740.932	0	312.473	0	336.032	84.2283	652.467	176.156	2212.1	82.9532	223.14	410.537	1081.31	129.536	1777.69	101.003	261.317	46.8582	564.209	0	513.116	409.588	2272.52	467.764	1170.24	0	1385.23	0	2996.1	65.94	187.639	0	376.41	45.589	625.946	0	1329.97	0	356.625	0	595.447
	4	0	306.942	236.513	585.344	0	1240.75	0	583.184	124.865	351.932	84.0544	406.737	55.7149	411.754	250.567	2151.64	140.805	301.9	103.784	507.855	22.6981	1070.54	0	157.613	17.3284	228.938	0	276.216	209.035	2320.71	206.388	764.872	436.495	2174.02	300.49	2387.68	53.94	185.639	0	452.539	54.5571	628.329	63.9926	1425.6	45.4028	415.458	0	442.944
	5	0	299.692	0	277.34	0	1038.48	0	555.184	382.411	381.284	382.301	639.904	138.99	585.311	496.103	2945.29	0	222.346	548.784	528.855	133.352	1591.07	0	186.836	104.332	441.05	0	534.616	319.588	2326.72	684.447	1591.51	1344.11	3784.43	1736.06	4350.16	92.2513	149.809	0	357.41	40.5571	631.329	27.5179	1658.55	0	461.151	0	585.457
	6	100.785	377.692	150.395	279.34	0	618.443	637.633	542.184	0	276.125	181.41	476.032	146.592	452.928	314.884	2360.33	0	227.27	483.957	582.628	228.032	2088.49	218.596	211.613	0	361.587	136.882	598.513	0	1495.01	393.774	804.084	339.792	1172.37	0	2540.21	87.8195	312.38	102.87	516.41	133.362	859.565	156.426	996.622	7.35642	616.048	225.078	482.145
	7	166.249	396.064	273.282	536.892	0	983.317	618.378	909.316	0	325.191	224.41	477.032	239.465	760.308	415.163	2900.64	134.805	190.937	660.038	675.964	33.8276	864.393	0	171.613	43.3151	449.527	501.907	560.802	0	1254.94	0	1055.83	1490.39	3661.42	1615.05	2213.66	105.94	176.639	86.87	286.41	65.5571	709.329	62.7617	1182.61	0	415.458	189.224	351.944
	8	4.78525	354.692	235.395	381.34	0	1237.03	283.403	419.097	44.5	277.855	221.41	483.032	195.057	1132.77	375.329	2919.68	0	205.937	275.045	245.082	26.8276	822.393	125.596	163.613	84.3068	353.648	398.672	364.769	233.521	2348.92	182.939	1522.5	1501	2669.23	1548.46	1306.62	96.9275	198.258	190.498	385.884	56.5571	653.829	64.1306	1188.47	0	360.458	0	291.468
	9	74.7339	613.067	91.3955	346.34	0	932.483	0	534.184	9	299.125	102.41	483.032	270.444	527.235	246.496	1957.05	0	218.937	456.952	679.241	216.843	2319.11	0	141.113	36.4222	204.587	81.7157	504.616	134.713	2129.03	343.924	1327.51	608.818	1939.1	1939.56	2829.17	140.94	235.139	156.568	352.247	199.374	1038.06	151.284	1379.16	222.153	547.381	0	365.024
	10	15.7853	469.692	270.989	414.577	0	815.503	0	404.391	0	264.125	114.41	486.032	53.7688	648.822	469.067	2300.14	124.331	198.732	370.784	517.855	200.828	1712.39	28.2631	144.947	94.4222	302.587	368.049	512.616	0	1064.52	231.924	936.514	775.883	1411.16	1999.08	3230.69	115.94	245.639	60.87	397.41	89.1141	609.531	0	841.968	266.565	814.996	118.721	432.081
	11	15.7853	474.692	307.895	450.34	0	960.483	30.1928	488.938	411	289.125	295.41	485.032	213.235	557.559	310.389	2134.95	120.998	249.018	234.784	519.855	251.248	2380.21	187.596	134.613	256.922	461.587	0	516.616	400.917	3287.88	683.924	788.514	1279.04	2261.41	1293.37	1955.46	149.94	256.639	168.903	738.069	101.212	508.785	365.131	983.468	262.089	701.929	596.224	329.944
	12	100.785	426.692	235.395	426.34	0	965.483	91.8661	557.45	397.034	344.159	262.97	367.092	266.235	584.607	332.227	1973.42	168.805	200.937	535.474	614.587	228.266	1445.5	175.039	169.142	139.868	600.401	610.808	595.286	152.219	2701.88	365.686	675.581	1200.91	2270.12	2102.44	5773.87	198.94	239.639	83.6821	525.956	152.734	864.235	0	1017.47	116.441	558.515	359.345	444.519
	13	133.399	598.226	233.395	431.34	0	1256.42	557.332	929.589	0	249.125	436.197	446.713	268.235	333.559	574.376	2380.95	14.3051	208.437	523.284	568.855	228.624	3351.12	296.596	139.613	96.9222	460.587	968.99	943.676	328.6	3425.02	0	738.558	392.25	2091.11	1678.46	2266.62	27.6067	108.306	200.508	485.135	179.468	1133.77	438.237	1710.54	0	414.458	266.224	357.944
	14	0	460.692	231.313	655.287	0	987.762	415.466	313.184	482	300.125	439.41	570.032	286.73	657.219	181.608	1971.89	82.8051	198.937	874.896	670.01	148.032	2124.48	24.5965	133.613	139.615	261.792	727.846	638.021	155.588	2509.52	469.654	1243.52	959.998	2982.42	2143.25	2167.55	0	236.639	74.87	414.41	109.557	892.329	420.381	1653.22	18.4028	498.458	0	290.944
	15	121.997	474.707	219.395	431.34	0	976.483	91.7122	560.529	0	290.125	317.001	739.754	233.235	362.559	391.389	2345.54	231.32	331.531	237.808	328.464	58.3776	1732.99	349.11	431.309	122.048	435.47	702.716	711.616	587.19	4841.1	598.924	1020.51	984.997	1556.23	703.625	1603.54	36.94	135.639	143.756	369.717	45.0571	727.329	409.131	1706.47	146.403	453.458	247.224	333.944
	16	135.785	498.692	201.395	432.34	0	962.483	451.133	306.184	0	263.125	470.557	522.474	340.235	561.559	528.442	1694.12	189.805	258.937	327.473	459.949	257.579	2052.54	273.596	147.613	117.922	241.587	270.045	677.97	230.606	1897.49	0	659.11	322.223	1427.96	2163.89	3779.79	161.607	92.9723	79.87	408.41	130.557	879.329	47.2056	1075.85	38.4028	500.458	112.654	419.207
	17	163.445	555.256	192.395	366.34	0	971.483	606.398	816.677	0	290.125	528.264	651.481	282.527	849.855	642.591	2980.91	213.805	208.937	144.784	268.855	230.596	2023.02	0	305.926	37.9222	219.587	818.716	322.616	529.114	4580.93	471.924	552.514	935.306	4002.37	2054.68	1824.17	77.94	164.639	145.817	510.7	45.5571	729.329	0	1079.5	0	680.807	0	326.44
	18	286.785	499.692	261.186	604.441	0	991.483	889.133	574.184	61.1745	301.99	309.528	397.491	180.628	611.029	266.567	1801.51	340.805	268.937	419.784	302.855	76.0276	2286.99	0	157.294	214.811	685.45	709.569	399.556	267.514	2970.83	0	828.714	476.634	2323.78	1963.46	999.615	56.6665	137.237	163.87	393.41	59.5571	867.329	8.3116	1567.7	110.403	478.458	157.267	428.803
	19	175.285	495.692	155.395	387.34	0	544.681	265.812	582.087	0	306.125	593.877	728.592	134.994	735.024	510.585	2381.65	37.8051	205.437	129.784	275.355	176.47	3148.73	0	246.113	0	631.142	427.716	337.616	380.392	2388.76	228.424	847.118	431.302	2139.2	1874.67	4244.3	103.94	147.639	162.87	405.41	41.5571	766.329	304.131	1088.47	0	451.926	94.2243	372.944
	20	32.2853	383.192	245.395	311.34	61.3671	706.354	178.133	450.184	0	320.725	275.41	601.032	455.235	627.559	503.767	2356.24	31.4717	279.937	283.731	336.381	231.812	2141.16	0	280.373	201.256	598.8	349.087	539.313	22.5875	1354.52	0	544.514	232.837	2283.19	1106.46	3170.62	54.94	137.639	117.87	283.41	62.2904	579.788	356.524	1371.57	0	428.062	0	515.278
	21	128.785	503.192	85.7868	497.253	0	529.567	321.799	483.184	0	339.125	572.41	568.032	332.691	964.37	437.503	2007.64	134.127	326.332	767.9	294.69	174.908	2009.38	0	274.613	59.9222	486.587	229.716	676.616	289.966	1544.62	428.924	656.514			1326.06	3003.62	62.2733	136.639	144.53	399.736	86.862	690.781	446.128	1301.68	184.403	628.458	271.224	310.444
	22	185.785	438.692	243.962	477.204	0	518.963	543.133	520.184	50.8056	404.03	348.41	564.032	203.314	864.598	763.959	3021.86	47.3884	308.492	15.5039	503.201	259.566	2825.8	0	265.166	165.983	396.83	616.268	857.31	420.117	2746.4	0	548.978			1599.8	3457.64	33.94	127.639	165.017	554.243	142.195	684.717	172.131	942.468	203.403	592.958	0	317.944
	23	181.785	511.692	327.001	632.675	0	986.483	545.133	522.184	475	300.125	619.196	662.981	261.092	627.131	616.995	1544.04	235.477	330.517	882.163	498.052	252.404	3426.63	0	131.613	297.922	312.587	831.992	425.363	391.154	3266.05	164.924	657.514			134.502	1546.46	122.94	134.139	196.87	485.41	184.557	753.329	207.929	1391.17	0	360.458	47.2243	343.944
	24	111.982	465.328	204.395	349.34	580.727	1106.54	529.179	463.464	748	301.125	263.577	217.532	296.289	382.344	218.667	1886.84	166.805	250.937	398.727	330.398	190.422	1911.01	0	226.613	123.603	429.309	786.716	332.616	459.54	1914.52	170.797	1255.31			1374.52	5368.68	115.477	249.105	52.4095	346.831	182.186	938.835	236.005	1483.39	156.403	626.458	423.164	578.68
	25	49.7853	391.692	179.038	481.29	0	856.483	648.027	770.535	696.279	361.352	299.41	223.782	112.599	373.2	118.526	2415.28	155.588	304.737	174.784	257.855	86.8979	1071.83	220.596	216.613	261.196	426.926	177.716	677.616	173.254	2300.18	0	1319.54			324.934	2412.87	146.036	183.783	29.87	439.41	91.446	729.329	457.827	2273.91	175.403	505.458	274.224	345.944
	26	215.785	520.692	272.895	456.84	0	543.034	491.747	470.57	519	379.625	303.91	186.282	285.235	277.559	220.567	1834.64	83.8051	270.937	148.784	265.855	192.828	1754.39	71.0965	245.113	96.9222	322.587	634.579	813.411	483.137	2049.52							150.94	145.639	146.759	497.982	113.91	916.69	231.381	1188.22	322.403	552.458	253.488	395.646
	27	166.785	387.692	182.395	475.34	0	1108.15	157.133	395.184	709.253	438.196	303.41	235.532	273.512	888.994	379.961	2159.22	0	291.937	168.784	250.855	236.828	1956.39	0	223.613	282.492	352.684	119.716	615.616	434.138	3274.31							137.94	214.639	150.87	403.41	121.557	805.329	475.181	1754.8	313.403	520.458	349.891	287.944
	28	79.7853	387.692	290.122	586.847	221.242	1011.27	127.133	376.184	485	403.125	430.66	548.657	127.235	635.559	242.939	2150.01	4.80507	249.937	258.784	260.688	170.613	1845.54	290.306	629.631	136.922	308.087	52.7157	608.616	364.384	2722.12							101.44	131.139	153.87	399.41	88.0817	677.616	250.729	1610.38	284.069	541.125	57.9026	397.518
	29	122.785	376.692	166.015	356.395	0	840.483	333.133	360.184	0	270.125	170.41	214.032	265.732	975.59	560.739	1415.28	92.5992	272.937	135.117	273.188	216.828	1814.39	0	456.268	144.686	350.798	139.216	617.116	643.717	3096.92							0.939993	118.639	107.047	435.985	123.863	698.013	403.942	1276.19	0	458.458	226.224	517.944
	30	195.285	409.192	324.395	474.34	523.174	835.483	0	417.966	516.478	465.797	169.41	214.032	87.651	631.828	282.02	2695.46	249.805	269.937	1020.78	391.855	110.063	1537.04	244.596	222.613	182.51	352.242	374.716	658.616	627.434	3874.82							110.94	138.639	141.87	376.41	125.583	718.979	417.131	1318.47	251.403	527.458	175.224	344.944
	31	268.057	369.476	181.395	466.34	538.174	863.483	410.133	369.184	159	363.125	401.188	582.138	232.38	594.864	265.567	1990.64	195.728	266.321	1060.62	623.347	187.828	1813.39	316.294	478.671	366.322	405.334	197.394	569.467	335.571	2529.92							149.94	128.639	151.87	368.41	62.904	1157.16	0	904.868	260.403	453.458	419.224	489.944
	32	194.101	408.317	237.395	449.34	0	1084.42	704.133	393.184	306.25	376.125	382.41	491.032	157.766	853.198	652.034	3315.79	190.78	294.468	606.93	484.343	115.928	1805.61	659.596	371.613	189.085	388.213	664.678	910.903	383.322	1851.31							109.94	138.139	38.87	346.41	12.3349	915.904	366.131	1258.47	0	508.19	526.224	506.944
	33	203.785	414.692	302.395	459.34	0	736.517	613.133	435.184	0	349.125	383.41	497.032	128.235	383.559	409.223	2317.97	258.805	259.937	814.784	368.855	178.749	2217.06	0	424.69	101.368	446.76	620.299	737.982	435.357	3476.2							160.94	213.639	45.7266	586.106	0	846.329			87.4028	460.458	482.224	306.944
	34	19.7853	351.692	114.395	290.34	335.174	859.483	750.133	400.184	167	272.125	162.41	472.032	227.165	595.763	303.759	1747.75	141.805	273.937	645.784	346.855	276.428	2533.39	0	213.69	199.922	327.587	296.716	444.616	232.801	2383.56							58.94	150.639	122.37	351.41	59.6281	893.168			0	376.458	16.6138	342.186
	35	33.5056	504.424	261.395	474.34	63.1736	812.483	523.133	552.184	281	304.125	393.687	986.162			258.867	1999.79	178.805	254.937	938.299	443.947	90.8096	1404.92	0	200.613	270.5	475.268	499.764	533.068	503.86	4061.76							26.94	144.639	69.8357	449.451	14.5571	645.329			211.266	435.037	374.224	311.944
	36	0	506.692	212.193	495.006	0	859.483	224.133	343.184	175	262.125	253.487	288.551			469.695	2931.04	53.8051	238.937	477.784	378.855	198.811	2540.36	0	285.925	0	361.087	131.716	575.616	442.824	2689.62							85.94	106.639	0	375.849	237.557	701.329			457.403	393.458	381.224	311.944
	37	168.785	508.192	147.395	301.34	0	647.932	295.133	329.184	0	369.642	103.19	388.341			451.514	2659.04	248.805	216.937	777.784	342.855	197.73	1802.88	0	169.613	345.922	380.587	197.039	355.955	222.033	1857.12							114.56	198.052	84.7637	606.587	0	670.329			290.323	546.636	224.9	462.995
	38	209.785	496.692	290.395	325.34	0	807.483	295.133	329.184	147	360.125	99.313	606.012			318.499	2168.78	164.805	225.937	715.784	346.855	129.481	2268.27	0	362.613	180.987	424.845	422.716	562.616	195.588	1337.52							202.94	96.639	25.37	238.91	0	651.329			393.403	392.458	0	374.037
	39	0	422.692	237.373	365.938	318.486	538.671	221.133	347.184	0	442.625	127.41	466.032			120.261	2753.23	242.805	233.437	905.779	799.38	186.436	2139.41	0	379.24	63.8914	301.279	590.716	435.616	169.051	1521.83							93.0114	93.758	110.203	230.41					83.6528	399.458	246.112	356.714
	40	47.7853	479.692	193.395	449.34	0	830.076	44.4832	515.927	982	360.125					382.935	2239.85	8.80507	253.937	642.651	570.521	139.078	1864.81	0	343.613	58.9222	253.587	478.101	520.506	269.667	1847.05							202.94	133.639	0	225.41					0	338.701	0	289.944
	41	78.7853	477.692	198.568	389.359	0	462.483	240.633	579.184	155.92	328.977					218.4	1806.97	205.679	288.857	309.32	342.275	28.4503	1195.45	120.596	221.613	27.1508	540.073	0	449.033	161.739	1492.45							89.94	132.639	0	297.708							339.224	297.944
	42	46.0041	601.023	253.107	413.984	0	436.483	130.15	497.487	0	411.125					551.259	3354.84	245.993	302.728	817.974	692.283	125.602	1729.52	0	253.534	123.922	368.587	555.216	433.116	200.335	1323.9							188.199	172.742	58.87	280.41							317.224	279.444
	43	0	453.881	209.395	382.34	0	454.483			0	420.125					608.439	3920.33	267.805	218.937	911.1	599.313	124.576	1751.86	0	320.613	49.9222	343.587	0	702.94	239.802	1506.87							132.257	226.109	17.745	390.935							0	402.829
	44	65.7853	487.692	161.395	382.34	0	489.141			615	342.125					338.911	2060.65	107.805	233.937	373.784	268.855	71.8934	1985.85	0	391.299	100.059	513.509			149.145	1132.27							97.94	166.639									210.224	312.944
	45	0	480.692	179.395	413.34	0	448.483			744	375.125							132.957	182.634	953.164	599.545	146.033	1948.24	132.596	147.613	190.95	436.71			242.054	1155.52							103.94	169.639									0	400.944
	46	79.3031	431.31	99.3955	402.34	0	433.483			0	290.125							61.8051	152.937	568.967	536.858	89.8276	1403.39	80.5858	191.752	74.9222	402.587			280.149	2024.72							127.94	92.639									0	383.944
	47	83.7853	503.692	174.395	377.34	0	635.483			0	555.043							82.8606	169.492	595.159	436.23	59.1609	1226.89	301.596	164.613	58.3659	392.349			85.7264	1780.18							73.8289	134.069									0	406.944
	48	0	361.692	160.395	385.34	0	687.595			8	281.125							46.8051	189.603	612.309	570.73	15.8276	1206.39	361.596	152.613	4.22956	455.396											62.94	237.639									117.224	316.944
	49			230.395	303.09	0	785.483			170	288.125							0	200.937	447.784	413.855	0.780542	1577.75	0	338.113	0	357.587											175.803	309.46									0	384.444
	50			336.395	291.34	0	599.332			819	364.125							196.952	249.804	635.784	516.855			0	332.93	83.9222	339.587											38.94	100.639									94.2243	379.944
	51			267.286	520.474	0	529.483			883	385.125							319.805	153.937	794.854	694.902			0	211.613	0	414.24											146.94	100.639									0	427.444
	52			69.3955	284.34	0	620.788			934	379.125							411.805	266.937	604.784	571.855			0	310.797													142.94	96.639
	53			42.1493	367.878	0	574.813			17	291.125							190.601	321.486	1195.78	537.855			0	272.399													79.2733	260.119
	54					0	493.483			910	386.625							137.377	136.651	879.932	638.315			0	190.399													29.9663	175.297
	55					0	648.483			134.4	438.325							151.805	260.437	704.784	545.855			0	295.613													208.94	207.639
	56					0	659.483			793.524	393.704							137.805	263.937	626.784	412.855			0	209.613													59.94	213.639
	57					0	885.626			789	375.125							164.805	188.937	768.784	408.855			188.596	164.613													50.94	178.639
	58					0	829.483			1015	320.125							95.8051	188.937	453.784	424.855			0	307.613													0	192.088
	59					0	867.483			1102	388.125							53.5238	159.405	0	218.855			0	346.613													0	136.639
	60					0	542.024			0	432.125							97.8051	191.937	309.457	515.043			0	214.613													0	138.639
	61					0	842.483			663.333	372.125							28.8051	252.937	0	299.24			0	292.613													31.94	140.639
	62					0	777.427			0	342.701							36.8051	235.937	530.316	649.272			0	212.613													0	151.639
	63					0	826.817			758.5	326.625							145.805	257.937	80.3034	474.127			220.596	173.613													6.73999	172.61
	64					0	826.483			925	332.125							149.805	274.937	252.843	476.443			0	175.113													121.94	108.639
	65					0	877.483			607	343.625							18.8051	261.937	116.784	368.855			0	232.613													22.94	116.639
	66					0	1082.04			0	463.984							226.205	265.737	135.406	450.855			0	228.613													41.4822	148.988
	67					0	869.483			48.1214	400.344							178.305	261.937					0	221.613													103.682	155.784
	68					0	478.417			0	365.199							100.638	267.937					0	274.839													52.94	114.639
	69					0	522.011			0	564.27							278.805	246.937					0	220.613													75.94	117.639
	70					0	845.483											75.8051	133.937																			0	121.639
	71					0	726.842											210.805	251.937																			0	184.784
	72					0	1152.5											101.305	245.437																			0	118.639
	73					0	841.817											509.805	247.937																			0	137.639
	74					0	840.483											342.805	242.937																			0	119.139
		95.0148	445.99	203.74	422.152	36.1852	796.386	329.182	509.534	300.307	350.374	290.167	474.415	209.122	635.883	384.785	2368.77	140.883	240.418	496.295	469.007	152.979	1900.72	73.3624	250.467	120.074	400.53	389.035	558.974	290.875	2372.91	268.153	933.531	731.269	2299.45	1322.17	2858.21	84.2383	163.429	96.059	411.382	91.1695	775.071	210.957	1333.03	127.179	494.631	165.504	391.542
[truncated: 40 more columns]

## Sheet: 7A metaphase
	HeLa EGFP-TOP3A CENPB-mCherry-BLM(Q672R)_WT vs 7A
	7A (S17A, T20A, S26A, S28A, S33A, T36A, S1417A)
	Metaphase	Image 01		Image 04		Image 09		Image 11		Image 13		Image 14		Image 15		Image 16		Image 18		Image 19		Image 20		Image 21		Image 23		Image 26		Image 28		Image 29		Image 33		Image 34		Image 35		Image 37a		Image 37b		Image 39		Image 40		Image 43
		EGFP-TOP3A	mCh-BLM	EGFP-TOP3A	mCh-BLM	EGFP-TOP3A	mCh-BLM	EGFP-TOP3A	mCh-BLM	EGFP-TOP3A	mCh-BLM	EGFP-TOP3A	mCh-BLM	EGFP-TOP3A	mCh-BLM	EGFP-TOP3A	mCh-BLM	EGFP-TOP3A	mCh-BLM	EGFP-TOP3A	mCh-BLM	EGFP-TOP3A	mCh-BLM	EGFP-TOP3A	mCh-BLM	EGFP-TOP3A	mCh-BLM	EGFP-TOP3A	mCh-BLM	EGFP-TOP3A	mCh-BLM	EGFP-TOP3A	mCh-BLM	EGFP-TOP3A	mCh-BLM	EGFP-TOP3A	mCh-BLM	EGFP-TOP3A	mCh-BLM	EGFP-TOP3A	mCh-BLM	EGFP-TOP3A	mCh-BLM	EGFP-TOP3A	mCh-BLM	EGFP-TOP3A	mCh-BLM	EGFP-TOP3A	mCh-BLM
	Background	2580.12	3935.21	3371.86	1298.32	2136.44	2039.86	5624.37	1662.36	2398.25	3491.32	6239.4	7267.07	39639.2	1082.21	6323.6	8097.65	8834.6	603.044	4609.61	2166.38	11274.2	2803.92	5201.56	2339.38	2391.29	584.072	3271.93	858.474	4913.3	2218.71	4623.62	1757.48	2212.07	3101.47	2301.51	1321.12	2414.03	1315.73	2205.65	973.312	2201.22	1075.58	16751.7	3725.49	2274.78	835.781	2971.73	2188.13
	1	2728.3	5708.34	3859.81	2685.01	2393.49	3142.29	7431.12	2610.7	3564.54	5448.57	8496.89	11595.4	41969.8	1804.99	8718.44	13265.8	9353.07	1051.92	5994.14	3600.88	11466.9	4636.78	7592.81	4915.73	3546.42	2456.89	4116.22	1951.18	6317.6	2913.13	5907.79	3354.51	2535.86	5001.72	2788.34	3183.13	2693.38	2046.82	2748.36	3637.37	2657.24	2493.87	22027.2	7951.13	4261.63	4270.26	3412.14	5268.7
	2	3608.51	8570.91	3968.86	2135.42	2583.18	3532.55	8210.67	2967.88	3642.13	5344.94	9283.88	11157.4	36274.1	1829.27	8948.64	15779.7	9590	1034	6392.61	4464.31	13374.6	3696.86	7353.48	4249.76	3307.12	1312.11	4351.54	1884	6421.33	3243.15	6018.02	3408.07	2526.39	4581.22	2615	2971	2561.96	1844.69	2765.11	3108.66	2490	2076	20337.7	6722.67	2851.86	2059.2	3359.84	4982.8
	3	3292	7385	3504.83	1923.86	2468	2898	7866.6	2969.09	3801.5	6108.65	7880.12	10891	43288.6	2134.26	8814.85	13149.9	7756	918	6347.3	3464	12848	3559	7439	3710	3400.44	1156.93	3816	1666	6534	2677	6963.01	4792.89	2392	4070	2671.17	3114.42	2751.98	1837.59	3057.52	5444.66	2755.89	3412.82	22348	7175.33	3022.07	2157.17	3755.22	5756.89
	4	3234	7367	4013	2474	2549.52	3528.48	7972.67	3285.19	3794.21	5569.67	8536	9856	45172.5	2237	9231.53	14433	8767	1052	6487.53	4620.75	12894	3393.93	6448.23	3779.66	3369.36	1292.61	3617.39	1464.77	6821.77	3523.95	6613.41	3752.49	2488	4070	2766.19	3251.93	2567	1707	2926.67	3976.14	2754.22	2847.32	22108	7081	3331.62	2798.69	3253.97	4530.46
	5	3429.18	7230.36	4077	2516.5	2431.15	3390.62	8616.35	2694.79	3522	4809	8841.98	10314.8	44845	1796	9300.78	13568.6	8962	854	6070	3305	14155.4	7328.11	7354.72	3470.76	3332.09	1227.82	4185.29	1635.48	6686.9	3066.81	6461.3	3091.98	2505.07	4481.94	2799.25	3677.69	2839.02	2296.95	2816.8	3258.36	2751.29	2888.65	23139.3	7260.08	3099.92	2327.12	3596.93	4825.92
	6	3419.12	6134.97	3813.5	1665	2313	2825	9058.99	2656.88	3867.9	5835.65	7708.7	9938.1	45126	1784	9722.7	17231.4	9300.34	768.983	6151	3198	12686.8	4741.8	7452.68	4284.98	3160.5	1048.5	3444	1333	6173.1	3389.66	7475	4135	2585	3986	2897.29	5065.75	2695	2037	2837.5	4395	2964.78	3263.47	21967	6715	3145.28	2309.87	3455.3	4456.9
	7	3356	5767	3347	1719	2570.13	3543.88	8626.2	4136.29	3761.38	5318.2	8903.89	10839.8	41724.5	2295.89	8309.49	10796.5	9404.73	886.634	6122.33	3090.7	14326.9	4134.45	7489.66	4236.85	3426.1	1488.8	4238.05	2177	6646.82	4114.54	6961.82	3226.84	2640.12	6843.39	2758.51	3220.25	2852.04	2379.15	3007.13	5182.53	2876.06	2751.45	21713	7110	3156.67	2265.23	3759	4366
	8	3501	5736	3863.22	1910.64	2454	3074	8541	2662.33	3543	4686	8880	9855	44197.6	2557.94	8827.56	14555.3	9568	835	6397.84	5117.07	14058.8	4090.73	7428.27	3744.22	3373.5	1686.17	4260.5	1798.47	6826	3127	6484.45	3160.24	2308	4086	2617	3048	2730	1960	2721.33	2751	2941.93	2966.8	23415.2	6837.12	3284.39	2777.95	3434.3	4654.96
	9	3589	6033	3537	1693	2501	2881	9214.36	2534.84	3589	4735	8789.4	9875.4	43941	2017	9746.92	16949.5	9065.33	856.333	6361.27	5133.93	14538.5	3987.49	8178.97	5047.07	3216	1053	4051.76	1644.62	6204	2941	7162.86	3850.94	2511	4078	2749.89	3592.91	2725	2171	2699.59	2743.82	2819.16	3411.35	23811.7	7131.4	3009.13	2393.22	4104.97	5432.12
	10	3264.89	5702.6	3965.68	2527.08	2286	2665	8967.23	2949.36	3421	4710	8283	9893.33	43661	2063	9282.34	16097	8952	764	6810.55	4337.13	14458.5	4945.66	7204.87	4879.67	3392.5	1041	3956.79	1462.74	6987.98	4351.46	6910.46	3423.88	2431	4228	2685	2900	3172.83	2220.43	2750.6	3104.52	2763.52	2952.59	22667.4	8498.28	3116.44	2473.44	3624.62	5167.29
	11	3185.5	5148	4239.96	2129.26	2408.45	3174.68	8463.57	2653.35	3552.78	4848.63	7401	9829	43982	2210	8676.22	14896.9	9224.75	865.25	6498.73	2855.67	13334.8	4973.36	8013.51	5554.19	2926.58	1054.79	4120.45	1286.13	6985.61	3265.18	6786	2926	2369	4060	2804	2912	2766	1958	2922.48	3949.16	2649.61	2538.68	23474.2	6817.44	3073.48	2213.71	3436	4473
	12	3516.69	7394.15	3760	2118	2500	3025	9378.44	3772.8	3739	5027.5	9097	9886	43565	2009	8352.76	12067	8552.31	847.887	7090.57	5125.97	15160.2	6432.04	6714	3745.5	3315	1138	4061.14	1853.89	6875.93	2849.15	6609.81	5196.99	2516.26	4971.63	2872.81	4410.07	2654.74	1766.34	2567.12	2933.03	2843	2818.38	23086.1	6610.68	3335.9	2950.12	3657.25	4847.99
	13	3598	6581.5	4150.08	2904.02	2151	2810	9721.31	3396.14	3253.26	4393.7	8461.23	9979.31	41239.9	2244.4	8453.24	13407.6	8558.5	807.5	6502.3	4994.1	12751	4870	8103.7	4653.61	3371	1465	4009.58	1579.26	6949.01	3401.01	7202.58	3254.75	2548	4759	2709.27	3458.13	2767	1953	2522.11	2634.22	2902.71	2744.81	24181.4	7504	3404.42	2717.49	3432.7	4220.35
	14	3606	6572	4126.83	2695.94	2457	2886	7293.9	3127.43	4024.73	6282.48	9553	9875	44735	2197	7922	11984	9376	869	6291.16	4447.69	13406.2	5773.62	7798.18	3778.39	2936.08	1267.54	4033	1395	6723.47	2745.86	7166.15	3578.69	2588.32	5456.28	2863	3399	2882.09	2023.16	2868.58	3648.67	2666.19	3265.91	21383.4	6181.46	3077.11	2114.81	3479.66	4562.55
	15	3460.14	7520.3	3542.95	2022.67	2507.5	2918.5	9575.24	3591.8	3842	5585.19	8344.66	11302	36617.1	2290.54	7421.47	10106.7	9633	831	6363.45	4752.04	14966.4	3845.2	8212.29	6082.05	3504	1481	4235.85	1516.3	6555	3479	7167.69	4041.7	2445.97	4327.67	2736.4	3275.08	2811	2005	2782.17	3942.03	3004.91	3540.7	22354.4	5964.14	3458.26	2485.96	3217.84	4517.01
	16	3626.5	6634	3977.85	1913.28	2458	2793	9253.03	2890.69	3850.76	5576.76	8672.99	10752	41925	2198	7308.28	10673.1	8625.23	751.175	6880.54	6079.07	14577.1	3910.2	7804.98	3823.02	3500	1467	4100	1392.67	6508	2560	6581.79	3204.56	2515.09	4632.85	2712.02	3069.72	2889	1962.25	3071.66	4507.19	2799.32	2406	23140.1	6644.72	3363.86	2664.6	3444.64	4158.07
	17	3656.5	6070.5	3654.74	2099.26	2343	2910	9195.5	3928.5	3629	4809	9332.39	11520.5	44972	2197			9601.2	924.247	6666.16	4263.54	15791.9	4558.21	7464.03	4353.8	3240	1462	3946	1390	7136.92	4107.72	7171.35	2680.11	2460.5	3862.26	2657	2943	2914.5	1970.5	2704.56	3147.24	2600.53	2321.98	23418	7154.35	3390	2561	3718.01	5899.42
	18	3473	6470	3872.31	2041.1	2455.27	3722.08	9566	2166	3611	4821	8956	9802	44736	1878			9059	812	6631.77	5268.63	14800	3379	6857.96	3592.16	2883	1144	4090	1525	6728.81	4422.9	7016	3213	2419.05	3836.23	2644.88	2930.98	2894	1948	2759.4	3233.09	2990.43	3735.34	23561.4	6700.92	3764.98	2905.36	3680.68	6315.66
	19	3362	5484	3702	1799	2530.05	2878.17	8143.49	3435.1	3871	5448	8962.49	11029.2	44924	1884			9152	798	6623.59	5362.36	15135	3418	7259.02	3288.36	3429	1442	4168	2055.25	7029	2640	7252.73	3359.77	2496.01	4571.73	2625	3196	2852.15	1968.63	2687.07	3378.98	2763.08	2481.04	23563	5703	3292	2586.75	3545.21	4138.03
	20	3460	5513	4175.25	2323.2	2475.5	2463.5	8179.79	3195.61	3803.08	5619.38	7969.33	9925.33	38677	1928			9167	800	6092.57	4016.96	13479.9	4659.44	8108.55	5366.52	3412.57	1411.45	4313.05	1856.16	7098	2599	7189.41	4008.74	2452	4129	2745	3386	2760	1960	2744.31	2948.34	2738.74	2690.46	23560.6	8290.12	3442	2555	3592.12	4827.23
	21	3400	5491	3982.21	2128.25	2482	2918	8402	2811	3874.8	6028.1	7642.8	10245.8	38264	1845			9969.38	843.032	6274.88	3850.07	15772.6	4650.63	7450.72	3615.84	3229.7	1224.69	4145	1617	7140.39	3453.47	6266.34	3160.27	2486.14	4929.93	2766.22	3476.25	2999.65	2501.2	2701.46	3174.84	2790.52	2995.51	23685	7169	3316.26	2996.26	3097.5	4351
	22			3926.8	1877.46	2408	2973	8962.65	2937.48	3924.33	6235.77	9392.16	9885.72	39220	1969.37			10505	998.76	6274.98	4469.74	16217.7	4481.83	6931.02	4350.93	3503.92	1578.14	3952.29	1458.97	6799	2573	6604.24	3512.99	2458	4782	2666.25	3086.5	2815.44	2364.82	2769.67	2888	2756.38	2216.12	24299.7	7137.98	3239.38	2552.52	3258.23	3798.98
	23			4079	1961	2534.83	3618.48	8948.98	2485.05	3643.09	7348.56	9501	9903	42588	2190			8539	821	6875.78	5424.44	14699	3803	7402.18	3442.2	3242.36	1681.78	4299.76	1702.82	6804.5	2561	6838.26	3966.32	2495.42	4292.56	2629	3129	2680.91	1644.29	2762.21	2890.7	2634	2148	23919	6437	3246.35	3213.19	3228.76	3921.81
	24			3846	1719	2585	3118	8458.97	2937.98	3799	5484	9494	9788	41618	1860			8820	756.5	6011.5	3184.64	13886.2	4124.68	7905.62	5774.61	2954.92	1271.62	4020.14	1634.04	6858	2561	6889	3476	2526.5	4940.15	2728.54	3385.81	3198	2478	2837.57	3719.2	2690.9	2514.64	23952.2	7448.56	3164.56	2023.76	3513.3	4707.74
	25			3754.79	2043.5	2539	3107	8969	2088	3877.78	6391.51	9780	9926	42035.7	1887.33			9576.33	850	7351.73	7351.79	15128.8	5455.58	8037.18	3845.69	3104	1271	4203.01	1737.55	7253.29	3653.43	6340.83	3107.55	2540.5	4884.38	2615	2904	2998.49	2784.34	2697.96	2567.55			24594.7	7018.78	3387.74	2374.99	3403.91	4976.97
	26			3761.46	1799.87	2564	2887	8152.71	2448.07	3858.32	5575.42	9704	9812	38070	1823			9063	797	5837.47	3601.26	15412.7	4934.31	7458.58	4869.64	3441.74	1173.51	3638.84	1462.22	7121.28	3678.38	6299	3133	2582.15	6700.58	2821.18	3951.43	2481	1602	2931.9	3783.65			24414.1	6955	3178	2703	3258.95	4150.99
	27			3667	1665	2421.2	2782.38			3728.1	5172.37	9197	9819	42214.2	2035.37			8570	749	6996.85	4160.45	15673	4239	7807.65	4341.66	2826.55	1342.22	4399	1409	7016.5	3071.5	6487	3031	2556	5641	2730	2927.5	2597	1615	2749	3215			24436	6988	3331.67	2544.31	2997.13	4681.19
	28			3778	1635	2228	2434			3725.19	6125.59	9365	9804	44484	1861			8509.5	724.75	5856.07	4124.94	16244.1	4767.86	6858.83	3549.32	3460.33	1259.85	4000.94	2114.36	6979.47	3491.42	6230	3068	2510	5616	2690	2762	2797	2483	2671.05	2928.68			23395.9	8151.4	3539.27	2766.36	3611.61	6202
	29			3574	1846	2199	2429			3847.57	5607.43	9610	9795	42997	1857			8541	728	5915.83	3479.19	14992.3	4808.25	7304.63	4444.61	3309.51	1090.95	4242.2	1654.09	6588.5	3059.5	6440.46	3868.61	2661	5642	2676.45	3142.45	2670	1603	2703.67	3168			20264.2	6729.58	3288.33	2307
	30			3461	1635	2411.44	2482.62			3875	5450	9507	9836	42223.4	1976.43			9538.93	1009.19	5517	3213	16628	4164	7546.07	4171.8	3275.67	1457	4316.35	1749.24	7013.75	3360.75			2504.58	4544.05	2651.02	3018.46	2669	1596.33	2711.72	3694.53			22148	4756.33	2975.94	2271.4
	31			3696.26	2112.96	2309	2474			3804.25	5508.53	9071.69	9899	38635.6	1815.99			9877.38	808.542	7922.77	4645.1	15482.5	3992.21	7623.07	4975.01	3370	1427.5	3931.49	1534.92	6923.49	2801.96			2596.34	5004.45	2811	3507.33	2884	2494	2716.41	3933.39			22159.7	4801.67	2946.4	2086.1
	32			3885.23	2059.95	2363.58	3067.5			3181.83	4975.37	9317	10016	38773.2	2353.93			9130	910	6198.18	4491.83	15406.2	4717.35	8177.17	5246.65	3215.74	1385.12	4098.2	1789.8	6667.4	2598			2481.95	3797.3	2809.26	4018.31	2755.5	2483.25	2783.8	3262			20593.7	5123.38	2813	2072
	33			3802.43	2108.76	2189	2682			3768.77	5681.69	9285	9909	42288	1953			9298	821	5987.89	3001.11	15737.6	4946.84	8220	3505	3211.86	1482.97	3818.05	1524.38	6941.5	3277			2403.28	4069.41	2638	2636	2630.25	1603.75	2925.04	4809.17			22720.5	5880.5	2786	2041
	34			4075.13	2791.4	2402	2580			3922.5	5446.5	8939.57	10076.1	39523	1837			9901.4	821	5680.78	3332.35	15880.2	4740.6	6436.09	3593.86	3293	1025	4412.89	2051.9	6718.9	3393.9			2758.66	7757.27	2647.4	2940.39	3135.12	2699.62	2603.12	2469.69			21111.1	6953.85	3081.7	2512.13
	35			4310	2301	2640	2520			3831.77	6315.48	8486.5	10688	40810.8	2125.01			9877	772	6320.11	3806.79	14895.4	4130.69	6729.02	3279.75	3106.89	1140.04	4285	1775	6621.5	2610.5			2506.38	3836.86	2651	3309	2620.75	1706.5	2488	2342.5			21642	5886	2973.8	2669.81
	36			4053	2331	2521	3118			3668	5318	8258.75	9931.5	40259	1824			9800.07	927.557	5908.74	3900.29	14494.5	4889.31	7300.84	3734.56	3304.81	1155.6	4268.66	1824					2421.2	3316	2677.4	2948.91	2623.45	1635.45	2771.38	3825.03			21204	5955
	37			3862.2	1967.57	2542.57	3018.32			3478.33	4778.6	9505	9874	40600.5	1854.5			10175.7	874.933	6542.68	4550.1	14726.3	5208.06	7255.21	4162.25	3211.29	1434.6	4341	1790					2450.98	4601.72	2654.33	3434.88	2818.75	2050.14
	38			3721	1774	2391.56	3214.88			3836.53	5089.35			41764.8	1740.69			9699	765	6028.42	3870.19	15406.5	4349.78	7209.08	5151.61	2982	1229	4382	1564					2568.5	6483.75	2671.8	3162.7	2757.56	2109.79
	39			3633.55	2132.87	2471.24	3206			3815.18	5685.04			39981.2	2081.13			8954.48	905.239	6542.91	5079.47	15333	4143	6816.27	4094.68	3549.35	1793.88	3931.53	1728.82					2543	6474	2727.28	3657.38	2756.27	1713.7
	40					2551.86	3802.13			3820	5317			35462.4	2135.2			9743	774	5959.28	3500.59	15138.4	4101.72	6906	4227.82	3504	1054							2404.75	3522.64	2670.97	3718.86	2641	1851
	41					2520.52	3626.06			3854.93	6128.79			39423.9	2295.49			10257	841			15414.9	4986.76	6997.27	4393.35	3375.38	1100.13							2565.5	6435	2638.08	3079.05	2726.5	1992.5
	42					2545.96	3069.82			3639.33	6086.33			41164	1616			9246	830			13889.3	4932.05			3162	1058							2639.88	6596.31			2704.71	1991.71
	43					2446.2	3066.47			3551.12	5013.27			40021	1830			9489	835							3196	1252							2602.19	5890.44			2839	2002
	44					2415	2582			3764	5376			40681.6	2088.29			9381	818							3086	1256							2448.5	4049.94			2825.2	1994.2
	45					2343	2638			3857.02	7369.25			40404.9	2012.01			10092	919							3086	1270.5							2454	5864.67			2715	2012
	46					2422.08	3303.33			3834	5334			39017	2276.88			9555	769							2978.28	1275.89											2853	1950
	47					2545.67	3414.47			3748.5	6098.9			40199.2	3270.45			9374.93	775.351							3189.56	1252.11											2893.81	2104.92
	48					2473.5	2782.5			3846.37	5666.54			35494.5	2084.01			10041.5	916							2997	1270											2713.69	1854.1
	49					2507	2770			3824.24	7327.31							9758	918							2971.94	1412.01											2823.73	2133.23
	50									3804.8	6131.6							9517	759							3159.6	1290.19											2580	1757
	51									3778.78	6096.67							9829.33	929.667							3239.56	1357.61											2801.83	1948.14
	52									3802.55	6464.59							9484	750							3061	1218											2653	1796
	53									3682.65	6148.29							9654	756							3366	1235											2713.66	1723.93
	54									3621.22	5156.08							9639	794							3583	1550											2740.2	1798
	55									3701.5	6035							9598.9	836.472							3367.51	1276.24											2740	1717
	56									3772.35	6087.69							9759	910							3395	1185											2870.31	1809.98
	57									3683	4566							9487	817							3249	1150
	58									3486.65	5229.23							9644	789							3382	1226
	59									3650.81	5753.88							9675	915							3282.31	1168.13
	60																	8821	786							3368.64	1357.99
	61																	8957.5	796.5							3148.54	1069.87
	62																	9607	786							3115	1230.1
	63																	9078.5	756							3174.23	1298.17
	64																	9307.33	916.667
	65																	9821	913
	66																	9555	804
	67																	9450	875
	68																	9649	881
	69																	9182	831
	70																	9175	810
	71																	9327	812
	72																	8486	838
	73																	8611	828
	74																	8449	803.667
		0	0	0	0	0	0	0	0	0	0	0	0	0	0	0	0	0	0	0	0	0	0	0	0	0	0	0	0	0	0	0	0	0	0	0	0	0	0	0	0	0	0	0	0	0	0	0	0
	1	148.184	1773.13	487.957	1386.7	257.05	1102.44	1806.75	948.344	1166.29	1957.26	2257.5	4328.33	2330.56	722.77	2394.83	5168.13	518.472	448.877	1384.53	1434.5	192.614	1832.86	2391.25	2576.35	1155.13	1872.82	844.286	1092.71	1404.3	694.419	1284.17	1597.03	323.789	1900.25	486.83	1862.01	279.35	731.088	542.71	2664.05	456.018	1418.29	5275.56	4225.64	1986.85	3434.48	440.403	3080.58
	2	1028.39	4635.69	596.998	837.107	446.734	1492.7	2586.3	1305.53	1243.88	1853.63	3044.49	3890.28	-3365.14	747.056	2625.04	7682.08	755.399	430.956	1783	2297.93	2100.35	892.941	2151.92	1910.38	915.837	728.039	1079.61	1025.53	1508.04	1024.44	1394.4	1650.6	314.314	1479.75	313.495	1649.88	147.926	528.954	559.461	2135.34	288.777	1000.42	3585.99	2997.18	577.076	1223.42	388.105	2794.67
	3	711.88	3449.79	132.97	625.542	331.557	858.145	2242.23	1306.73	1403.25	2617.34	1640.73	3623.98	3649.32	1052.05	2491.25	5052.25	-1078.6	314.956	1737.69	1297.62	1573.75	755.082	2237.44	1370.62	1009.15	572.853	544.068	807.526	1620.7	458.293	2339.39	3035.42	179.925	968.532	369.664	1793.3	337.949	521.86	851.877	4471.35	554.666	2337.25	5596.32	3449.85	747.287	1321.39	783.481	3568.76
	4	653.88	3431.79	641.142	1175.68	413.074	1488.62	2348.3	1622.83	1395.97	2078.36	2296.6	2588.93	5533.26	1154.79	2907.93	6335.36	-67.6014	448.956	1877.92	2454.37	1619.76	590.01	1246.67	1440.27	978.069	708.543	345.46	606.295	1908.47	1305.25	1989.79	1995.02	275.925	968.532	464.684	1930.81	152.971	391.267	721.02	3002.83	552.994	1771.75	5356.32	3355.51	1056.83	1962.91	282.232	2342.34
	5	849.061	3295.14	705.142	1218.18	294.708	1350.77	2991.97	1032.43	1123.75	1317.68	2602.58	3047.78	5205.76	713.785	2977.17	5470.97	127.399	250.956	1460.39	1138.62	2881.19	4524.19	2153.16	1131.38	940.805	643.746	913.355	777.006	1773.6	848.103	1837.68	1334.5	292.994	1380.48	497.745	2356.57	424.991	981.215	611.155	2285.05	550.064	1813.07	6387.6	3534.59	825.141	1491.33	625.2	2637.8
	6	838.998	2199.75	441.642	366.684	176.557	785.145	3434.62	994.522	1469.65	2344.33	1469.3	2671.03	5486.76	701.785	3399.1	9133.79	465.738	165.939	1541.39	1031.62	1412.59	1937.88	2251.12	1945.6	769.214	464.428	172.068	474.526	1259.81	1170.96	2851.38	2377.52	372.925	884.532	595.781	3744.62	280.971	721.267	631.854	3421.69	763.559	2187.89	5215.32	2989.51	870.498	1474.08	483.569	2268.78
	7	775.88	1831.79	-24.8578	420.684	433.691	1504.02	3001.83	2473.93	1363.13	1826.88	2664.5	3572.73	2085.24	1213.67	1985.89	2698.88	570.131	283.59	1512.72	924.317	3052.66	1330.53	2288.1	1897.47	1034.82	904.724	966.115	1318.53	1733.53	1895.84	2338.2	1469.37	428.045	3741.92	457.001	1899.12	438.008	1063.41	801.484	4209.22	674.837	1675.87	4961.32	3384.51	881.89	1429.45	787.265	2177.87
	8	920.88	1800.79	491.366	612.32	317.557	1034.14	2916.63	999.974	1144.75	1194.68	2640.6	2587.93	4558.38	1475.73	2503.96	6457.7	733.399	231.956	1788.23	2950.69	2784.53	1286.81	2226.71	1404.83	982.21	1102.09	988.569	939.993	1912.7	908.293	1860.83	1402.77	95.9252	984.532	315.495	1726.88	315.971	644.267	515.687	1777.69	740.704	1891.22	6663.47	3111.63	1009.61	1942.17	462.565	2466.84
	9	1008.88	2097.79	165.142	394.684	364.557	841.145	3589.99	872.477	1190.75	1243.68	2550	2608.33	4301.76	934.785	3423.32	8851.86	230.732	253.289	1751.66	2967.55	3264.3	1183.57	2977.41	2707.69	824.714	468.928	779.828	786.141	1290.7	722.293	2539.24	2093.46	298.925	976.532	448.389	2271.79	310.971	855.267	493.948	1770.51	617.94	2335.77	7060.07	3405.91	734.35	1557.44	1133.23	3244
	10	684.771	1767.38	593.826	1228.76	149.557	625.145	3342.86	1287	1022.75	1218.68	2043.6	2626.27	4021.76	980.785	2958.74	7999.36	117.399	160.956	2200.94	2170.75	3184.29	2141.74	2003.31	2540.28	1001.21	456.928	684.86	604.262	2074.68	2132.75	2286.84	1666.41	218.925	1126.53	383.495	1578.88	758.797	904.702	544.951	2131.21	562.299	1877.01	5915.72	4772.8	841.664	1637.66	652.882	2979.17
	11	605.38	1212.79	868.107	830.949	272.01	1134.82	2839.2	990.992	1154.53	1357.31	1161.6	2561.93	4342.76	1127.79	2352.61	6799.29	390.149	262.206	1889.12	689.286	2060.55	2169.45	2811.95	3214.8	535.295	470.719	848.519	427.658	2072.32	1046.47	2162.38	1168.52	156.925	958.532	502.495	1590.88	351.971	642.267	716.838	2975.84	448.387	1463.11	6722.5	3091.95	798.703	1377.93	464.265	2284.87
	12	936.568	3458.94	388.142	819.684	363.557	985.145	3754.07	2110.44	1340.75	1536.18	2857.6	2618.93	3925.76	926.785	2029.16	3969.38	-282.292	244.843	2480.96	2959.59	3885.99	3628.12	1512.44	1406.12	923.714	553.928	789.207	995.413	1962.63	630.442	1986.19	3439.51	304.19	1870.16	571.3	3088.95	240.713	450.61	361.479	1959.71	641.777	1742.8	6334.46	2885.19	1061.12	2114.34	685.512	2659.87
	13	1017.88	2646.29	778.223	1605.7	14.5566	770.145	4096.94	1733.78	855.011	902.385	2221.84	2712.24	1600.65	1162.19	2129.64	5309.99	-276.101	204.456	1892.69	2827.72	1476.75	2066.08	2902.14	2314.22	979.714	880.928	737.644	720.782	2035.72	1182.3	2578.96	1497.27	335.925	1657.53	407.762	2137	352.971	637.267	316.465	1660.91	701.486	1669.23	7429.73	3778.51	1129.63	1881.71	460.968	2032.23
	14	1025.88	2636.79	754.975	1397.63	320.557	846.145	1669.53	1465.07	1626.48	2791.16	3313.6	2607.93	5095.76	1114.79	1598.4	3886.35	541.399	265.956	1681.55	2281.31	2131.95	2969.7	2596.62	1439.01	544.796	683.469	761.068	536.526	1810.18	527.153	2542.53	1821.22	376.241	2354.81	561.495	2077.88	468.059	707.426	662.937	2675.35	464.967	2190.33	4631.72	2455.97	802.329	1279.03	507.926	2374.42
	15	880.021	3585.08	171.09	724.358	371.057	878.645	3950.87	1929.44	1443.75	2093.87	2105.26	4034.98	-3022.12	1208.33	1097.87	2009.04	798.399	227.956	1753.84	2585.66	3692.12	1041.28	3010.73	3742.66	1112.71	896.928	963.919	657.825	1641.7	1260.29	2544.07	2284.23	233.896	1226.2	434.897	1953.96	396.971	689.267	576.522	2968.72	803.684	2465.12	5602.75	2238.66	1183.48	1650.18	246.109	2328.88
	16	1046.38	2698.79	605.991	614.963	321.557	753.145	3628.66	1228.33	1452.51	2085.44	2433.59	3484.9	2285.76	1115.79	984.683	2575.45	-209.375	148.131	2270.93	3912.69	3302.86	1106.29	2603.42	1483.63	1108.71	882.928	828.068	534.192	1594.7	341.293	1958.17	1447.09	303.018	1531.38	410.517	1748.6	474.971	646.517	866.01	3533.88	598.099	1330.42	6388.39	2919.23	1089.08	1828.82	472.903	1969.95
	17	1076.38	2135.29	282.879	800.944	206.557	870.145	3571.13	2266.14	1230.75	1317.68	3093	4253.39	5332.76	1114.79	-6323.6	-8097.65	766.599	321.203	2056.55	2097.16	4517.6	1754.29	2262.47	2014.42	848.714	877.928	674.068	531.526	2223.63	1889.01	2547.73	922.637	248.421	760.797	355.495	1621.88	500.471	654.767	498.909	2173.93	399.31	1246.4	6666.29	3428.86	1115.22	1725.22	746.273	3711.3
	18	892.88	2534.79	500.45	742.783	318.826	1682.23	3941.63	503.64	1212.75	1329.68	2716.6	2534.93	5096.76	795.785	-6323.6	-8097.65	224.399	208.956	2022.16	3102.25	3525.75	575.082	1656.4	1252.77	491.714	559.928	818.068	666.526	1815.51	2204.2	2392.38	1455.52	206.971	734.759	343.379	1609.86	479.971	632.267	553.754	2259.78	789.207	2659.76	6809.71	2975.44	1490.2	2069.58	708.942	4127.53
	19	781.88	1548.79	330.142	500.684	393.609	838.315	2519.12	1772.74	1472.75	1956.68	2723.09	3762.12	5284.76	801.785	-6323.6	-8097.65	317.399	194.956	2013.99	3195.98	3860.75	614.082	2057.46	948.977	1037.71	857.928	896.068	1196.77	2115.7	421.293	2629.11	1602.29	283.934	1470.27	323.495	1874.88	438.119	652.895	481.426	2405.67	561.862	1405.47	6811.32	1977.51	1017.22	1750.97	573.479	1949.9
	20	879.88	1577.79	803.389	1024.88	339.057	423.645	2555.42	1533.25	1404.83	2128.07	1729.94	2658.27	-962.243	845.785	-6323.6	-8097.65	332.399	196.956	1482.96	1850.58	2205.69	1855.52	2906.99	3027.14	1021.28	827.379	1041.12	997.685	2184.7	380.293	2565.79	2251.26	239.925	1027.53	443.495	2064.88	345.971	644.267	538.668	1975.03	537.522	1614.89	6808.91	4564.63	1167.22	1719.22	620.381	2639.11
	21	819.88	1555.79	610.352	829.934	345.557	878.145	2777.63	1148.64	1476.56	2536.78	1403.4	2978.76	-1375.24	762.785	-6323.6	-8097.65	1134.78	239.988	1665.27	1683.69	4498.36	1846.71	2249.16	1276.45	838.417	640.617	873.068	758.526	2227.09	1234.76	1642.72	1402.79	274.068	1828.46	464.715	2155.12	585.621	1185.47	495.816	2201.52	589.298	1919.93	6933.32	3443.51	1041.47	2160.48	125.765	2162.87
	22	-2580.12	-3935.21	554.942	579.142	271.557	933.145	3338.28	1275.12	1526.09	2744.45	3152.76	2618.65	-419.243	887.153	-6323.6	-8097.65	1670.45	395.716	1665.37	2303.36	4943.47	1677.91	1729.46	2011.55	1112.63	994.07	680.362	600.496	1885.7	354.293	1980.62	1755.52	245.925	1680.53	364.745	1765.38	401.406	1049.09	564.02	1914.69	555.152	1140.55	7548	3412.49	964.6	1716.74	286.491	1610.85
	23	-2580.12	-3935.21	707.142	662.684	398.388	1578.62	3324.6	822.694	1244.84	3857.25	3261.6	2635.93	2948.76	1107.79	-6323.6	-8097.65	-295.601	217.956	2266.17	3258.06	3424.75	999.082	2200.62	1102.81	851.074	1097.71	1027.83	844.341	1891.2	342.293	2214.64	2208.84	283.349	1191.09	327.495	1807.88	266.877	328.56	556.561	1917.39	432.777	1072.42	7167.32	2711.51	971.571	2377.4	257.023	1733.68
	24	-2580.12	-3935.21	474.142	420.684	448.557	1078.14	2834.6	1275.62	1400.75	1992.68	3254.6	2520.93	1978.76	777.785	-6323.6	-8097.65	-14.6014	153.456	1401.89	1018.26	2611.92	1320.76	2704.06	3435.23	563.634	687.553	748.21	775.568	1944.7	342.293	2265.38	1718.52	314.423	1838.68	427.031	2064.69	783.971	1162.27	631.927	2745.88	489.674	1439.06	7200.56	3723.08	889.776	1187.98	541.562	2519.62
	25	-2580.12	-3935.21	382.932	745.182	402.557	1067.14	3344.63	425.64	1479.53	2900.19	3540.6	2658.93	2396.42	805.118	-6323.6	-8097.65	741.732	246.956	2742.12	5185.41	3854.55	2651.66	2835.62	1506.31	712.714	686.928	931.074	879.078	2340	1434.72	1717.21	1350.08	328.425	1782.91	313.495	1582.88	584.458	1468.61	492.317	1594.24	-2201.22	-1075.58	7842.99	3293.29	1112.96	1539.21	432.176	2788.84
	26	-2580.12	-3935.21	389.599	501.55	427.557	847.145	2528.34	785.712	1460.08	2084.1	3464.6	2544.93	-1569.24	740.785	-6323.6	-8097.65	228.399	193.956	1227.86	1434.88	4138.41	2130.39	2257.02	2530.26	1050.45	589.434	366.912	603.743	2207.99	1459.67	1675.38	1375.52	370.08	3599.11	519.671	2630.31	66.9706	286.267	726.255	2810.34	-2201.22	-1075.58	7662.43	3229.51	903.219	1867.22	287.211	1962.86
	27	-2580.12	-3935.21	295.142	366.684	284.757	742.52	-5624.37	-1662.36	1329.86	1681.06	2957.6	2551.93	2574.99	953.153	-6323.6	-8097.65	-264.601	145.956	2387.24	1994.07	4398.75	1435.08	2606.09	2002.28	435.267	758.152	1127.07	550.526	2103.2	852.793	1863.38	1273.52	343.925	2539.53	428.495	1606.38	182.971	299.267	543.354	2241.69	-2201.22	-1075.58	7684.32	3262.51	1056.89	1708.53	25.3949	2493.07
	28	-2580.12	-3935.21	406.142	336.684	91.5566	394.145	-5624.37	-1662.36	1326.94	2634.28	3125.6	2536.93	4844.76	778.785	-6323.6	-8097.65	-325.101	121.706	1246.46	1958.56	4969.81	1963.94	1657.27	1209.94	1069.04	675.777	729.004	1255.88	2066.17	1272.71	1606.38	1310.52	297.925	2514.53	388.495	1440.88	382.971	1167.27	465.407	1955.37	-2201.22	-1075.58	6644.21	4425.91	1264.49	1930.58	639.878	4013.87
	29	-2580.12	-3935.21	202.142	547.684	62.5566	389.145	-5624.37	-1662.36	1449.32	2116.11	3370.6	2527.93	3357.76	774.785	-6323.6	-8097.65	-293.601	124.956	1306.22	1312.81	3718.02	2004.34	2103.07	2105.23	918.225	506.875	970.268	795.615	1675.2	840.793	1816.84	2111.14	448.925	2540.53	374.949	1821.33	255.971	287.267	498.02	2194.69	-2201.22	-1075.58	3512.49	3004.09	1013.55	1471.22	-2971.73	-2188.13
	30	-2580.12	-3935.21	89.1422	336.684	274.994	442.77	-5624.37	-1662.36	1476.75	1958.68	3267.6	2568.93	2584.19	894.22	-6323.6	-8097.65	704.327	406.146	907.39	1046.62	5353.75	1360.08	2344.51	1832.41	884.38	872.928	1044.42	890.765	2100.45	1142.04	-4623.62	-1757.48	292.501	1442.58	349.514	1697.34	254.971	280.6	506.071	2721.22	-2201.22	-1075.58	5396.32	1030.85	701.159	1435.62	-2971.73	-2188.13
	31	-2580.12	-3935.21	324.405	814.646	172.557	434.145	-5624.37	-1662.36	1406	2017.21	2832.29	2631.93	-1003.63	733.778	-6323.6	-8097.65	1042.77	205.498	3313.16	2478.72	4208.3	1188.3	2421.51	2635.63	978.714	843.428	659.554	676.446	2010.2	583.253	-4623.62	-1757.48	384.265	1902.99	509.495	2186.21	469.971	1178.27	510.76	2960.08	-2201.22	-1075.58	5407.99	1076.18	671.619	1250.32	-2971.73	-2188.13
	32	-2580.12	-3935.21	513.377	761.632	227.132	1027.65	-5624.37	-1662.36	783.583	1484.06	3077.6	2748.93	-866.022	1271.72	-6323.6	-8097.65	295.399	306.956	1588.57	2325.45	4131.92	1913.43	2975.61	2907.27	824.458	801.048	826.268	931.326	1754.1	379.293	-4623.62	-1757.48	269.877	695.833	507.758	2697.18	341.471	1167.52	578.154	2288.69	-2201.22	-1075.58	3842.04	1397.9	538.219	1236.22	-2971.73	-2188.13
	33	-2580.12	-3935.21	430.573	810.448	52.5566	642.145	-5624.37	-1662.36	1370.52	2190.38	3045.6	2641.93	2648.76	870.785	-6323.6	-8097.65	463.399	217.956	1378.28	834.727	4463.38	2142.92	3018.44	1165.62	820.569	898.902	546.115	665.902	2028.2	1058.29	-4623.62	-1757.48	191.205	967.946	336.495	1314.88	216.221	288.017	719.394	3835.86	-2201.22	-1075.58	5968.82	2155.01	511.219	1205.22	-2971.73	-2188.13
	34	-2580.12	-3935.21	703.273	1493.09	265.557	540.145	-5624.37	-1662.36	1524.25	1955.18	2700.18	2809.03	-116.243	754.785	-6323.6	-8097.65	1066.8	217.956	1071.17	1165.97	4605.95	1936.68	1234.53	1254.48	901.714	440.928	1140.96	1193.43	1805.6	1175.19	-4623.62	-1757.48	546.584	4655.8	345.893	1619.26	721.09	1383.89	397.478	1496.38	-2201.22	-1075.58	4359.46	3228.37	806.92	1676.35	-2971.73	-2188.13
	35	-2580.12	-3935.21	938.142	1002.68	503.557	480.145	-5624.37	-1662.36	1433.52	2824.16	2247.1	3420.97	1171.55	1042.8	-6323.6	-8097.65	1042.4	168.956	1710.5	1640.41	3621.2	1326.77	1527.46	940.369	715.605	555.964	1013.07	916.526	1708.2	391.793	-4623.62	-1757.48	294.305	735.393	349.495	1987.88	206.721	390.767	282.354	1369.19	-2201.22	-1075.58	4890.32	2160.51	699.019	1834.03	-2971.73	-2188.13
	36	-2580.12	-3935.21	681.142	1032.68	384.557	1078.14	-5624.37	-1662.36	1269.75	1826.68	2019.35	2664.43	619.757	741.785	-6323.6	-8097.65	965.464	324.513	1299.13	1733.91	3220.25	2085.39	2099.28	1395.18	913.528	571.528	996.726	965.526	-4913.3	-2218.71	-4623.62	-1757.48	209.125	214.532	375.892	1627.79	209.425	319.721	565.731	2851.72	-2201.22	-1075.58	4452.32	2229.51	-2274.78	-835.781	-2971.73	-2188.13
	37	-2580.12	-3935.21	490.344	669.255	406.131	978.466	-5624.37	-1662.36	1080.09	1287.28	3265.6	2606.93	961.257	772.285	-6323.6	-8097.65	1341.08	271.889	1933.07	2383.72	3452.01	2404.14	2053.65	1822.87	820.001	850.525	1069.07	931.526	-4913.3	-2218.71	-4623.62	-1757.48	238.907	1500.26	352.824	2113.76	404.724	734.404	-2205.65	-973.312	-2201.22	-1075.58	-16751.7	-3725.49	-2274.78	-835.781	-2971.73	-2188.13
	38	-2580.12	-3935.21	349.142	475.684	255.119	1175.03	-5624.37	-1662.36	1438.28	1598.04	-6239.4	-7267.07	2125.52	658.478	-6323.6	-8097.65	864.399	161.956	1418.81	1703.81	4132.3	1545.86	2007.52	2812.23	590.714	644.928	1110.07	705.526	-4913.3	-2218.71	-4623.62	-1757.48	356.425	3382.28	370.295	1841.58	343.53	794.057	-2205.65	-973.312	-2201.22	-1075.58	-16751.7	-3725.49	-2274.78	-835.781	-2971.73	-2188.13
	39	-2580.12	-3935.21	261.696	834.55	334.792	1166.14	-5624.37	-1662.36	1416.93	2193.72	-6239.4	-7267.07	341.973	998.912	-6323.6	-8097.65	119.876	302.195	1933.3	2913.09	4058.75	1339.08	1614.71	1755.3	1158.07	1209.8	659.598	870.349	-4913.3	-2218.71	-4623.62	-1757.48	330.925	3372.53	425.776	2336.26	342.241	397.97	-2205.65	-973.312	-2201.22	-1075.58	-16751.7	-3725.49	-2274.78	-835.781	-2971.73	-2188.13
	40	-2580.12	-3935.21	-3371.86	-1298.32	415.421	1762.27	-5624.37	-1662.36	1421.75	1825.68	-6239.4	-7267.07	-4176.8	1052.99	-6323.6	-8097.65	908.399	170.956	1349.67	1334.21	3864.2	1297.81	1704.44	1888.44	1112.71	469.928	-3271.93	-858.474	-4913.3	-2218.71	-4623.62	-1757.48	192.671	421.171	369.465	2397.74	226.971	535.267	-2205.65	-973.312	-2201.22	-1075.58	-16751.7	-3725.49	-2274.78	-835.781	-2971.73	-2188.13
	41	-2580.12	-3935.21	-3371.86	-1298.32	384.077	1586.2	-5624.37	-1662.36	1456.68	2637.47	-6239.4	-7267.07	-215.299	1213.27	-6323.6	-8097.65	1422.4	237.956	-4609.61	-2166.38	4140.61	2182.85	1795.71	2053.97	984.095	516.055	-3271.93	-858.474	-4913.3	-2218.71	-4623.62	-1757.48	353.425	3333.53	336.574	1757.93	312.471	676.767	-2205.65	-973.312	-2201.22	-1075.58	-16751.7	-3725.49	-2274.78	-835.781	-2971.73	-2188.13
	42	-2580.12	-3935.21	-3371.86	-1298.32	409.521	1029.96	-5624.37	-1662.36	1241.09	2595.02	-6239.4	-7267.07	1524.76	533.785	-6323.6	-8097.65	411.399	226.956	-4609.61	-2166.38	2615.1	2128.13	-5201.56	-2339.38	770.714	473.928	-3271.93	-858.474	-4913.3	-2218.71	-4623.62	-1757.48	427.81	3494.84	-2301.51	-1321.12	290.685	675.981	-2205.65	-973.312	-2201.22	-1075.58	-16751.7	-3725.49	-2274.78	-835.781	-2971.73	-2188.13
	43	-2580.12	-3935.21	-3371.86	-1298.32	309.755	1026.61	-5624.37	-1662.36	1152.87	1521.95	-6239.4	-7267.07	381.757	747.785	-6323.6	-8097.65	654.399	231.956	-4609.61	-2166.38	-11274.2	-2803.92	-5201.56	-2339.38	804.714	667.928	-3271.93	-858.474	-4913.3	-2218.71	-4623.62	-1757.48	390.113	2788.97	-2301.51	-1321.12	424.971	686.267	-2205.65	-973.312	-2201.22	-1075.58	-16751.7	-3725.49	-2274.78	-835.781	-2971.73	-2188.13
	44	-2580.12	-3935.21	-3371.86	-1298.32	278.557	542.145	-5624.37	-1662.36	1365.75	1884.68	-6239.4	-7267.07	1042.36	1006.07	-6323.6	-8097.65	546.399	214.956	-4609.61	-2166.38	-11274.2	-2803.92	-5201.56	-2339.38	694.714	671.928	-3271.93	-858.474	-4913.3	-2218.71	-4623.62	-1757.48	236.428	948.474	-2301.51	-1321.12	411.171	678.467	-2205.65	-973.312	-2201.22	-1075.58	-16751.7	-3725.49	-2274.78	-835.781	-2971.73	-2188.13
	45	-2580.12	-3935.21	-3371.86	-1298.32	206.557	598.145	-5624.37	-1662.36	1458.78	3877.94	-6239.4	-7267.07	765.653	929.793	-6323.6	-8097.65	1257.4	315.956	-4609.61	-2166.38	-11274.2	-2803.92	-5201.56	-2339.38	694.714	686.428	-3271.93	-858.474	-4913.3	-2218.71	-4623.62	-1757.48	241.925	2763.2	-2301.51	-1321.12	300.971	696.267	-2205.65	-973.312	-2201.22	-1075.58	-16751.7	-3725.49	-2274.78	-835.781	-2971.73	-2188.13
	46	-2580.12	-3935.21	-3371.86	-1298.32	285.633	1263.47	-5624.37	-1662.36	1435.75	1842.68	-6239.4	-7267.07	-622.203	1194.66	-6323.6	-8097.65	720.399	165.956	-4609.61	-2166.38	-11274.2	-2803.92	-5201.56	-2339.38	586.992	691.813	-3271.93	-858.474	-4913.3	-2218.71	-4623.62	-1757.48	-2212.07	-3101.47	-2301.51	-1321.12	438.971	634.267	-2205.65	-973.312	-2201.22	-1075.58	-16751.7	-3725.49	-2274.78	-835.781	-2971.73	-2188.13
	47	-2580.12	-3935.21	-3371.86	-1298.32	409.225	1374.61	-5624.37	-1662.36	1350.25	2607.58	-6239.4	-7267.07	559.99	2188.24	-6323.6	-8097.65	540.326	172.307	-4609.61	-2166.38	-11274.2	-2803.92	-5201.56	-2339.38	798.269	668.039	-3271.93	-858.474	-4913.3	-2218.71	-4623.62	-1757.48	-2212.07	-3101.47	-2301.51	-1321.12	479.778	789.184	-2205.65	-973.312	-2201.22	-1075.58	-16751.7	-3725.49	-2274.78	-835.781	-2971.73	-2188.13
	48	-2580.12	-3935.21	-3371.86	-1298.32	337.057	742.645	-5624.37	-1662.36	1448.12	2175.23	-6239.4	-7267.07	-4144.76	1001.8	-6323.6	-8097.65	1206.9	312.956	-4609.61	-2166.38	-11274.2	-2803.92	-5201.56	-2339.38	605.714	685.928	-3271.93	-858.474	-4913.3	-2218.71	-4623.62	-1757.48	-2212.07	-3101.47	-2301.51	-1321.12	299.664	538.371	-2205.65	-973.312	-2201.22	-1075.58	-16751.7	-3725.49	-2274.78	-835.781	-2971.73	-2188.13
	49	-2580.12	-3935.21	-3371.86	-1298.32	370.557	730.145	-5624.37	-1662.36	1426	3835.99	-6239.4	-7267.07	-39639.2	-1082.21	-6323.6	-8097.65	923.399	314.956	-4609.61	-2166.38	-11274.2	-2803.92	-5201.56	-2339.38	580.656	827.941	-3271.93	-858.474	-4913.3	-2218.71	-4623.62	-1757.48	-2212.07	-3101.47	-2301.51	-1321.12	409.696	817.493	-2205.65	-973.312	-2201.22	-1075.58	-16751.7	-3725.49	-2274.78	-835.781	-2971.73	-2188.13
	50	-2580.12	-3935.21	-3371.86	-1298.32	-2136.44	-2039.86	-5624.37	-1662.36	1406.55	2640.28	-6239.4	-7267.07	-39639.2	-1082.21	-6323.6	-8097.65	682.399	155.956	-4609.61	-2166.38	-11274.2	-2803.92	-5201.56	-2339.38	768.317	706.119	-3271.93	-858.474	-4913.3	-2218.71	-4623.62	-1757.48	-2212.07	-3101.47	-2301.51	-1321.12	165.971	441.267	-2205.65	-973.312	-2201.22	-1075.58	-16751.7	-3725.49	-2274.78	-835.781	-2971.73	-2188.13
	51	-2580.12	-3935.21	-3371.86	-1298.32	-2136.44	-2039.86	-5624.37	-1662.36	1380.53	2605.35	-6239.4	-7267.07	-39639.2	-1082.21	-6323.6	-8097.65	994.732	326.623	-4609.61	-2166.38	-11274.2	-2803.92	-5201.56	-2339.38	848.278	773.542	-3271.93	-858.474	-4913.3	-2218.71	-4623.62	-1757.48	-2212.07	-3101.47	-2301.51	-1321.12	387.803	632.404	-2205.65	-973.312	-2201.22	-1075.58	-16751.7	-3725.49	-2274.78	-835.781	-2971.73	-2188.13
	52	-2580.12	-3935.21	-3371.86	-1298.32	-2136.44	-2039.86	-5624.37	-1662.36	1404.3	2973.28	-6239.4	-7267.07	-39639.2	-1082.21	-6323.6	-8097.65	649.399	146.956	-4609.61	-2166.38	-11274.2	-2803.92	-5201.56	-2339.38	669.714	633.928	-3271.93	-858.474	-4913.3	-2218.71	-4623.62	-1757.48	-2212.07	-3101.47	-2301.51	-1321.12	238.971	480.267	-2205.65	-973.312	-2201.22	-1075.58	-16751.7	-3725.49	-2274.78	-835.781	-2971.73	-2188.13
	53	-2580.12	-3935.21	-3371.86	-1298.32	-2136.44	-2039.86	-5624.37	-1662.36	1284.4	2656.98	-6239.4	-7267.07	-39639.2	-1082.21	-6323.6	-8097.65	819.399	152.956	-4609.61	-2166.38	-11274.2	-2803.92	-5201.56	-2339.38	974.714	650.928	-3271.93	-858.474	-4913.3	-2218.71	-4623.62	-1757.48	-2212.07	-3101.47	-2301.51	-1321.12	299.626	408.198	-2205.65	-973.312	-2201.22	-1075.58	-16751.7	-3725.49	-2274.78	-835.781	-2971.73	-2188.13
	54	-2580.12	-3935.21	-3371.86	-1298.32	-2136.44	-2039.86	-5624.37	-1662.36	1222.97	1664.76	-6239.4	-7267.07	-39639.2	-1082.21	-6323.6	-8097.65	804.399	190.956	-4609.61	-2166.38	-11274.2	-2803.92	-5201.56	-2339.38	1191.71	965.928	-3271.93	-858.474	-4913.3	-2218.71	-4623.62	-1757.48	-2212.07	-3101.47	-2301.51	-1321.12	326.167	482.267	-2205.65	-973.312	-2201.22	-1075.58	-16751.7	-3725.49	-2274.78	-835.781	-2971.73	-2188.13
	55	-2580.12	-3935.21	-3371.86	-1298.32	-2136.44	-2039.86	-5624.37	-1662.36	1303.25	2543.68	-6239.4	-7267.07	-39639.2	-1082.21	-6323.6	-8097.65	764.301	233.428	-4609.61	-2166.38	-11274.2	-2803.92	-5201.56	-2339.38	976.224	692.167	-3271.93	-858.474	-4913.3	-2218.71	-4623.62	-1757.48	-2212.07	-3101.47	-2301.51	-1321.12	325.971	401.267	-2205.65	-973.312	-2201.22	-1075.58	-16751.7	-3725.49	-2274.78	-835.781	-2971.73	-2188.13
	56	-2580.12	-3935.21	-3371.86	-1298.32	-2136.44	-2039.86	-5624.37	-1662.36	1374.1	2596.38	-6239.4	-7267.07	-39639.2	-1082.21	-6323.6	-8097.65	924.399	306.956	-4609.61	-2166.38	-11274.2	-2803.92	-5201.56	-2339.38	1003.71	600.928	-3271.93	-858.474	-4913.3	-2218.71	-4623.62	-1757.48	-2212.07	-3101.47	-2301.51	-1321.12	456.284	494.252	-2205.65	-973.312	-2201.22	-1075.58	-16751.7	-3725.49	-2274.78	-835.781	-2971.73	-2188.13
	57	-2580.12	-3935.21	-3371.86	-1298.32	-2136.44	-2039.86	-5624.37	-1662.36	1284.75	1074.68	-6239.4	-7267.07	-39639.2	-1082.21	-6323.6	-8097.65	652.399	213.956	-4609.61	-2166.38	-11274.2	-2803.92	-5201.56	-2339.38	857.714	565.928	-3271.93	-858.474	-4913.3	-2218.71	-4623.62	-1757.48	-2212.07	-3101.47	-2301.51	-1321.12	-2414.03	-1315.73	-2205.65	-973.312	-2201.22	-1075.58	-16751.7	-3725.49	-2274.78	-835.781	-2971.73	-2188.13
	58	-2580.12	-3935.21	-3371.86	-1298.32	-2136.44	-2039.86	-5624.37	-1662.36	1088.41	1737.91	-6239.4	-7267.07	-39639.2	-1082.21	-6323.6	-8097.65	809.399	185.956	-4609.61	-2166.38	-11274.2	-2803.92	-5201.56	-2339.38	990.714	641.928	-3271.93	-858.474	-4913.3	-2218.71	-4623.62	-1757.48	-2212.07	-3101.47	-2301.51	-1321.12	-2414.03	-1315.73	-2205.65	-973.312	-2201.22	-1075.58	-16751.7	-3725.49	-2274.78	-835.781	-2971.73	-2188.13
	59	-2580.12	-3935.21	-3371.86	-1298.32	-2136.44	-2039.86	-5624.37	-1662.36	1252.57	2262.56	-6239.4	-7267.07	-39639.2	-1082.21	-6323.6	-8097.65	840.399	311.956	-4609.61	-2166.38	-11274.2	-2803.92	-5201.56	-2339.38	891.023	584.06	-3271.93	-858.474	-4913.3	-2218.71	-4623.62	-1757.48	-2212.07	-3101.47	-2301.51	-1321.12	-2414.03	-1315.73	-2205.65	-973.312	-2201.22	-1075.58	-16751.7	-3725.49	-2274.78	-835.781	-2971.73	-2188.13
	60	-2580.12	-3935.21	-3371.86	-1298.32	-2136.44	-2039.86	-5624.37	-1662.36	-2398.25	-3491.32	-6239.4	-7267.07	-39639.2	-1082.21	-6323.6	-8097.65	-13.6014	182.956	-4609.61	-2166.38	-11274.2	-2803.92	-5201.56	-2339.38	977.35	773.918	-3271.93	-858.474	-4913.3	-2218.71	-4623.62	-1757.48	-2212.07	-3101.47	-2301.51	-1321.12	-2414.03	-1315.73	-2205.65	-973.312	-2201.22	-1075.58	-16751.7	-3725.49	-2274.78	-835.781	-2971.73	-2188.13
	61	-2580.12	-3935.21	-3371.86	-1298.32	-2136.44	-2039.86	-5624.37	-1662.36	-2398.25	-3491.32	-6239.4	-7267.07	-39639.2	-1082.21	-6323.6	-8097.65	122.899	193.456	-4609.61	-2166.38	-11274.2	-2803.92	-5201.56	-2339.38	757.257	485.798	-3271.93	-858.474	-4913.3	-2218.71	-4623.62	-1757.48	-2212.07	-3101.47	-2301.51	-1321.12	-2414.03	-1315.73	-2205.65	-973.312	-2201.22	-1075.58	-16751.7	-3725.49	-2274.78	-835.781	-2971.73	-2188.13
	62	-2580.12	-3935.21	-3371.86	-1298.32	-2136.44	-2039.86	-5624.37	-1662.36	-2398.25	-3491.32	-6239.4	-7267.07	-39639.2	-1082.21	-6323.6	-8097.65	772.399	182.956	-4609.61	-2166.38	-11274.2	-2803.92	-5201.56	-2339.38	723.714	646.024	-3271.93	-858.474	-4913.3	-2218.71	-4623.62	-1757.48	-2212.07	-3101.47	-2301.51	-1321.12	-2414.03	-1315.73	-2205.65	-973.312	-2201.22	-1075.58	-16751.7	-3725.49	-2274.78	-835.781	-2971.73	-2188.13
	63	-2580.12	-3935.21	-3371.86	-1298.32	-2136.44	-2039.86	-5624.37	-1662.36	-2398.25	-3491.32	-6239.4	-7267.07	-39639.2	-1082.21	-6323.6	-8097.65	243.899	152.956	-4609.61	-2166.38	-11274.2	-2803.92	-5201.56	-2339.38	782.944	714.097	-3271.93	-858.474	-4913.3	-2218.71	-4623.62	-1757.48	-2212.07	-3101.47	-2301.51	-1321.12	-2414.03	-1315.73	-2205.65	-973.312	-2201.22	-1075.58	-16751.7	-3725.49	-2274.78	-835.781	-2971.73	-2188.13
	64	-2580.12	-3935.21	-3371.86	-1298.32	-2136.44	-2039.86	-5624.37	-1662.36	-2398.25	-3491.32	-6239.4	-7267.07	-39639.2	-1082.21	-6323.6	-8097.65	472.732	313.623	-4609.61	-2166.38	-11274.2	-2803.92	-5201.56	-2339.38	-2391.29	-584.072	-3271.93	-858.474	-4913.3	-2218.71	-4623.62	-1757.48	-2212.07	-3101.47	-2301.51	-1321.12	-2414.03	-1315.73	-2205.65	-973.312	-2201.22	-1075.58	-16751.7	-3725.49	-2274.78	-835.781	-2971.73	-2188.13
	65	-2580.12	-3935.21	-3371.86	-1298.32	-2136.44	-2039.86	-5624.37	-1662.36	-2398.25	-3491.32	-6239.4	-7267.07	-39639.2	-1082.21	-6323.6	-8097.65	986.399	309.956	-4609.61	-2166.38	-11274.2	-2803.92	-5201.56	-2339.38	-2391.29	-584.072	-3271.93	-858.474	-4913.3	-2218.71	-4623.62	-1757.48	-2212.07	-3101.47	-2301.51	-1321.12	-2414.03	-1315.73	-2205.65	-973.312	-2201.22	-1075.58	-16751.7	-3725.49	-2274.78	-835.781	-2971.73	-2188.13
	66	-2580.12	-3935.21	-3371.86	-1298.32	-2136.44	-2039.86	-5624.37	-1662.36	-2398.25	-3491.32	-6239.4	-7267.07	-39639.2	-1082.21	-6323.6	-8097.65	720.399	200.956	-4609.61	-2166.38	-11274.2	-2803.92	-5201.56	-2339.38	-2391.29	-584.072	-3271.93	-858.474	-4913.3	-2218.71	-4623.62	-1757.48	-2212.07	-3101.47	-2301.51	-1321.12	-2414.03	-1315.73	-2205.65	-973.312	-2201.22	-1075.58	-16751.7	-3725.49	-2274.78	-835.781	-2971.73	-2188.13
	67	-2580.12	-3935.21	-3371.86	-1298.32	-2136.44	-2039.86	-5624.37	-1662.36	-2398.25	-3491.32	-6239.4	-7267.07	-39639.2	-1082.21	-6323.6	-8097.65	615.399	271.956	-4609.61	-2166.38	-11274.2	-2803.92	-5201.56	-2339.38	-2391.29	-584.072	-3271.93	-858.474	-4913.3	-2218.71	-4623.62	-1757.48	-2212.07	-3101.47	-2301.51	-1321.12	-2414.03	-1315.73	-2205.65	-973.312	-2201.22	-1075.58	-16751.7	-3725.49	-2274.78	-835.781	-2971.73	-2188.13
	68	-2580.12	-3935.21	-3371.86	-1298.32	-2136.44	-2039.86	-5624.37	-1662.36	-2398.25	-3491.32	-6239.4	-7267.07	-39639.2	-1082.21	-6323.6	-8097.65	814.399	277.956	-4609.61	-2166.38	-11274.2	-2803.92	-5201.56	-2339.38	-2391.29	-584.072	-3271.93	-858.474	-4913.3	-2218.71	-4623.62	-1757.48	-2212.07	-3101.47	-2301.51	-1321.12	-2414.03	-1315.73	-2205.65	-973.312	-2201.22	-1075.58	-16751.7	-3725.49	-2274.78	-835.781	-2971.73	-2188.13
	69	-2580.12	-3935.21	-3371.86	-1298.32	-2136.44	-2039.86	-5624.37	-1662.36	-2398.25	-3491.32	-6239.4	-7267.07	-39639.2	-1082.21	-6323.6	-8097.65	347.399	227.956	-4609.61	-2166.38	-11274.2	-2803.92	-5201.56	-2339.38	-2391.29	-584.072	-3271.93	-858.474	-4913.3	-2218.71	-4623.62	-1757.48	-2212.07	-3101.47	-2301.51	-1321.12	-2414.03	-1315.73	-2205.65	-973.312	-2201.22	-1075.58	-16751.7	-3725.49	-2274.78	-835.781	-2971.73	-2188.13
	70	-2580.12	-3935.21	-3371.86	-1298.32	-2136.44	-2039.86	-5624.37	-1662.36	-2398.25	-3491.32	-6239.4	-7267.07	-39639.2	-1082.21	-6323.6	-8097.65	340.399	206.956	-4609.61	-2166.38	-11274.2	-2803.92	-5201.56	-2339.38	-2391.29	-584.072	-3271.93	-858.474	-4913.3	-2218.71	-4623.62	-1757.48	-2212.07	-3101.47	-2301.51	-1321.12	-2414.03	-1315.73	-2205.65	-973.312	-2201.22	-1075.58	-16751.7	-3725.49	-2274.78	-835.781	-2971.73	-2188.13
	71	-2580.12	-3935.21	-3371.86	-1298.32	-2136.44	-2039.86	-5624.37	-1662.36	-2398.25	-3491.32	-6239.4	-7267.07	-39639.2	-1082.21	-6323.6	-8097.65	492.399	208.956	-4609.61	-2166.38	-11274.2	-2803.92	-5201.56	-2339.38	-2391.29	-584.072	-3271.93	-858.474	-4913.3	-2218.71	-4623.62	-1757.48	-2212.07	-3101.47	-2301.51	-1321.12	-2414.03	-1315.73	-2205.65	-973.312	-2201.22	-1075.58	-16751.7	-3725.49	-2274.78	-835.781	-2971.73	-2188.13
	72	-2580.12	-3935.21	-3371.86	-1298.32	-2136.44	-2039.86	-5624.37	-1662.36	-2398.25	-3491.32	-6239.4	-7267.07	-39639.2	-1082.21	-6323.6	-8097.65	-348.601	234.956	-4609.61	-2166.38	-11274.2	-2803.92	-5201.56	-2339.38	-2391.29	-584.072	-3271.93	-858.474	-4913.3	-2218.71	-4623.62	-1757.48	-2212.07	-3101.47	-2301.51	-1321.12	-2414.03	-1315.73	-2205.65	-973.312	-2201.22	-1075.58	-16751.7	-3725.49	-2274.78	-835.781	-2971.73	-2188.13
	73	-2580.12	-3935.21	-3371.86	-1298.32	-2136.44	-2039.86	-5624.37	-1662.36	-2398.25	-3491.32	-6239.4	-7267.07	-39639.2	-1082.21	-6323.6	-8097.65	-223.601	224.956	-4609.61	-2166.38	-11274.2	-2803.92	-5201.56	-2339.38	-2391.29	-584.072	-3271.93	-858.474	-4913.3	-2218.71	-4623.62	-1757.48	-2212.07	-3101.47	-2301.51	-1321.12	-2414.03	-1315.73	-2205.65	-973.312	-2201.22	-1075.58	-16751.7	-3725.49	-2274.78	-835.781	-2971.73	-2188.13
	74	-2580.12	-3935.21	-3371.86	-1298.32	-2136.44	-2039.86	-5624.37	-1662.36	-2398.25	-3491.32	-6239.4	-7267.07	-39639.2	-1082.21	-6323.6	-8097.65	-385.601	200.623	-4609.61	-2166.38	-11274.2	-2803.92	-5201.56	-2339.38	-2391.29	-584.072	-3271.93	-858.474	-4913.3	-2218.71	-4623.62	-1757.48	-2212.07	-3101.47	-2301.51	-1321.12	-2414.03	-1315.73	-2205.65	-973.312	-2201.22	-1075.58	-16751.7	-3725.49	-2274.78	-835.781	-2971.73	-2188.13
	1	0	0	0	0	0	0	0	0	0	0	0	0	0	0	0	0	0	0	0	0	0	0	0	0	0	0	0	0	0	0	0	0	0	0	0	0	0	0	0	0	0	0	0	0	0	0	0	0
	2	148.184	1773.13	487.957	1386.7	257.05	1102.44	1806.75	948.344	1166.29	1957.26	2257.5	4328.33	2330.56	722.77	2394.83	5168.13	518.472	448.877	1384.53	1434.5	192.614	1832.86	2391.25	2576.35	1155.13	1872.82	844.286	1092.71	1404.3	694.419	1284.17	1597.03	323.789	1900.25	486.83	1862.01	279.35	731.088	542.71	2664.05	456.018	1418.29	5275.56	4225.64	1986.85	3434.48	440.403	3080.58
	3	1028.39	4635.69	596.998	837.107	446.734	1492.7	2586.3	1305.53	1243.88	1853.63	3044.49	3890.28	0	747.056	2625.04	7682.08	755.399	430.956	1783	2297.93	2100.35	892.941	2151.92	1910.38	915.837	728.039	1079.61	1025.53	1508.04	1024.44	1394.4	1650.6	314.314	1479.75	313.495	1649.88	147.926	528.954	559.461	2135.34	288.777	1000.42	3585.99	2997.18	577.076	1223.42	388.105	2794.67
	4	711.88	3449.79	132.97	625.542	331.557	858.145	2242.23	1306.73	1403.25	2617.34	1640.73	3623.98	3649.32	1052.05	2491.25	5052.25	0	314.956	1737.69	1297.62	1573.75	755.082	2237.44	1370.62	1009.15	572.853	544.068	807.526	1620.7	458.293	2339.39	3035.42	179.925	968.532	369.664	1793.3	337.949	521.86	851.877	4471.35	554.666	2337.25	5596.32	3449.85	747.287	1321.39	783.481	3568.76
	5	653.88	3431.79	641.142	1175.68	413.074	1488.62	2348.3	1622.83	1395.97	2078.36	2296.6	2588.93	5533.26	1154.79	2907.93	6335.36	0	448.956	1877.92	2454.37	1619.76	590.01	1246.67	1440.27	978.069	708.543	345.46	606.295	1908.47	1305.25	1989.79	1995.02	275.925	968.532	464.684	1930.81	152.971	391.267	721.02	3002.83	552.994	1771.75	5356.32	3355.51	1056.83	1962.91	282.232	2342.34
	6	849.061	3295.14	705.142	1218.18	294.708	1350.77	2991.97	1032.43	1123.75	1317.68	2602.58	3047.78	5205.76	713.785	2977.17	5470.97	127.399	250.956	1460.39	1138.62	2881.19	4524.19	2153.16	1131.38	940.805	643.746	913.355	777.006	1773.6	848.103	1837.68	1334.5	292.994	1380.48	497.745	2356.57	424.991	981.215	611.155	2285.05	550.064	1813.07	6387.6	3534.59	825.141	1491.33	625.2	2637.8
	7	838.998	2199.75	441.642	366.684	176.557	785.145	3434.62	994.522	1469.65	2344.33	1469.3	2671.03	5486.76	701.785	3399.1	9133.79	465.738	165.939	1541.39	1031.62	1412.59	1937.88	2251.12	1945.6	769.214	464.428	172.068	474.526	1259.81	1170.96	2851.38	2377.52	372.925	884.532	595.781	3744.62	280.971	721.267	631.854	3421.69	763.559	2187.89	5215.32	2989.51	870.498	1474.08	483.569	2268.78
	8	775.88	1831.79	0	420.684	433.691	1504.02	3001.83	2473.93	1363.13	1826.88	2664.5	3572.73	2085.24	1213.67	1985.89	2698.88	570.131	283.59	1512.72	924.317	3052.66	1330.53	2288.1	1897.47	1034.82	904.724	966.115	1318.53	1733.53	1895.84	2338.2	1469.37	428.045	3741.92	457.001	1899.12	438.008	1063.41	801.484	4209.22	674.837	1675.87	4961.32	3384.51	881.89	1429.45	787.265	2177.87
	9	920.88	1800.79	491.366	612.32	317.557	1034.14	2916.63	999.974	1144.75	1194.68	2640.6	2587.93	4558.38	1475.73	2503.96	6457.7	733.399	231.956	1788.23	2950.69	2784.53	1286.81	2226.71	1404.83	982.21	1102.09	988.569	939.993	1912.7	908.293	1860.83	1402.77	95.9252	984.532	315.495	1726.88	315.971	644.267	515.687	1777.69	740.704	1891.22	6663.47	3111.63	1009.61	1942.17	462.565	2466.84
	10	1008.88	2097.79	165.142	394.684	364.557	841.145	3589.99	872.477	1190.75	1243.68	2550	2608.33	4301.76	934.785	3423.32	8851.86	230.732	253.289	1751.66	2967.55	3264.3	1183.57	2977.41	2707.69	824.714	468.928	779.828	786.141	1290.7	722.293	2539.24	2093.46	298.925	976.532	448.389	2271.79	310.971	855.267	493.948	1770.51	617.94	2335.77	7060.07	3405.91	734.35	1557.44	1133.23	3244
	11	684.771	1767.38	593.826	1228.76	149.557	625.145	3342.86	1287	1022.75	1218.68	2043.6	2626.27	4021.76	980.785	2958.74	7999.36	117.399	160.956	2200.94	2170.75	3184.29	2141.74	2003.31	2540.28	1001.21	456.928	684.86	604.262	2074.68	2132.75	2286.84	1666.41	218.925	1126.53	383.495	1578.88	758.797	904.702	544.951	2131.21	562.299	1877.01	5915.72	4772.8	841.664	1637.66	652.882	2979.17
	12	605.38	1212.79	868.107	830.949	272.01	1134.82	2839.2	990.992	1154.53	1357.31	1161.6	2561.93	4342.76	1127.79	2352.61	6799.29	390.149	262.206	1889.12	689.286	2060.55	2169.45	2811.95	3214.8	535.295	470.719	848.519	427.658	2072.32	1046.47	2162.38	1168.52	156.925	958.532	502.495	1590.88	351.971	642.267	716.838	2975.84	448.387	1463.11	6722.5	3091.95	798.703	1377.93	464.265	2284.87
	13	936.568	3458.94	388.142	819.684	363.557	985.145	3754.07	2110.44	1340.75	1536.18	2857.6	2618.93	3925.76	926.785	2029.16	3969.38	0	244.843	2480.96	2959.59	3885.99	3628.12	1512.44	1406.12	923.714	553.928	789.207	995.413	1962.63	630.442	1986.19	3439.51	304.19	1870.16	571.3	3088.95	240.713	450.61	361.479	1959.71	641.777	1742.8	6334.46	2885.19	1061.12	2114.34	685.512	2659.87
	14	1017.88	2646.29	778.223	1605.7	14.5566	770.145	4096.94	1733.78	855.011	902.385	2221.84	2712.24	1600.65	1162.19	2129.64	5309.99	0	204.456	1892.69	2827.72	1476.75	2066.08	2902.14	2314.22	979.714	880.928	737.644	720.782	2035.72	1182.3	2578.96	1497.27	335.925	1657.53	407.762	2137	352.971	637.267	316.465	1660.91	701.486	1669.23	7429.73	3778.51	1129.63	1881.71	460.968	2032.23
	15	1025.88	2636.79	754.975	1397.63	320.557	846.145	1669.53	1465.07	1626.48	2791.16	3313.6	2607.93	5095.76	1114.79	1598.4	3886.35	541.399	265.956	1681.55	2281.31	2131.95	2969.7	2596.62	1439.01	544.796	683.469	761.068	536.526	1810.18	527.153	2542.53	1821.22	376.241	2354.81	561.495	2077.88	468.059	707.426	662.937	2675.35	464.967	2190.33	4631.72	2455.97	802.329	1279.03	507.926	2374.42
	16	880.021	3585.08	171.09	724.358	371.057	878.645	3950.87	1929.44	1443.75	2093.87	2105.26	4034.98	0	1208.33	1097.87	2009.04	798.399	227.956	1753.84	2585.66	3692.12	1041.28	3010.73	3742.66	1112.71	896.928	963.919	657.825	1641.7	1260.29	2544.07	2284.23	233.896	1226.2	434.897	1953.96	396.971	689.267	576.522	2968.72	803.684	2465.12	5602.75	2238.66	1183.48	1650.18	246.109	2328.88
	17	1046.38	2698.79	605.991	614.963	321.557	753.145	3628.66	1228.33	1452.51	2085.44	2433.59	3484.9	2285.76	1115.79	984.683	2575.45	0	148.131	2270.93	3912.69	3302.86	1106.29	2603.42	1483.63	1108.71	882.928	828.068	534.192	1594.7	341.293	1958.17	1447.09	303.018	1531.38	410.517	1748.6	474.971	646.517	866.01	3533.88	598.099	1330.42	6388.39	2919.23	1089.08	1828.82	472.903	1969.95
	18	1076.38	2135.29	282.879	800.944	206.557	870.145	3571.13	2266.14	1230.75	1317.68	3093	4253.39	5332.76	1114.79			766.599	321.203	2056.55	2097.16	4517.6	1754.29	2262.47	2014.42	848.714	877.928	674.068	531.526	2223.63	1889.01	2547.73	922.637	248.421	760.797	355.495	1621.88	500.471	654.767	498.909	2173.93	399.31	1246.4	6666.29	3428.86	1115.22	1725.22	746.273	3711.3
	19	892.88	2534.79	500.45	742.783	318.826	1682.23	3941.63	503.64	1212.75	1329.68	2716.6	2534.93	5096.76	795.785			224.399	208.956	2022.16	3102.25	3525.75	575.082	1656.4	1252.77	491.714	559.928	818.068	666.526	1815.51	2204.2	2392.38	1455.52	206.971	734.759	343.379	1609.86	479.971	632.267	553.754	2259.78	789.207	2659.76	6809.71	2975.44	1490.2	2069.58	708.942	4127.53
	20	781.88	1548.79	330.142	500.684	393.609	838.315	2519.12	1772.74	1472.75	1956.68	2723.09	3762.12	5284.76	801.785			317.399	194.956	2013.99	3195.98	3860.75	614.082	2057.46	948.977	1037.71	857.928	896.068	1196.77	2115.7	421.293	2629.11	1602.29	283.934	1470.27	323.495	1874.88	438.119	652.895	481.426	2405.67	561.862	1405.47	6811.32	1977.51	1017.22	1750.97	573.479	1949.9
	21	879.88	1577.79	803.389	1024.88	339.057	423.645	2555.42	1533.25	1404.83	2128.07	1729.94	2658.27	0	845.785			332.399	196.956	1482.96	1850.58	2205.69	1855.52	2906.99	3027.14	1021.28	827.379	1041.12	997.685	2184.7	380.293	2565.79	2251.26	239.925	1027.53	443.495	2064.88	345.971	644.267	538.668	1975.03	537.522	1614.89	6808.91	4564.63	1167.22	1719.22	620.381	2639.11
	22	819.88	1555.79	610.352	829.934	345.557	878.145	2777.63	1148.64	1476.56	2536.78	1403.4	2978.76	0	762.785			1134.78	239.988	1665.27	1683.69	4498.36	1846.71	2249.16	1276.45	838.417	640.617	873.068	758.526	2227.09	1234.76	1642.72	1402.79	274.068	1828.46	464.715	2155.12	585.621	1185.47	495.816	2201.52	589.298	1919.93	6933.32	3443.51	1041.47	2160.48	125.765	2162.87
	23			554.942	579.142	271.557	933.145	3338.28	1275.12	1526.09	2744.45	3152.76	2618.65	0	887.153			1670.45	395.716	1665.37	2303.36	4943.47	1677.91	1729.46	2011.55	1112.63	994.07	680.362	600.496	1885.7	354.293	1980.62	1755.52	245.925	1680.53	364.745	1765.38	401.406	1049.09	564.02	1914.69	555.152	1140.55	7548	3412.49	964.6	1716.74	286.491	1610.85
	24			707.142	662.684	398.388	1578.62	3324.6	822.694	1244.84	3857.25	3261.6	2635.93	2948.76	1107.79			0	217.956	2266.17	3258.06	3424.75	999.082	2200.62	1102.81	851.074	1097.71	1027.83	844.341	1891.2	342.293	2214.64	2208.84	283.349	1191.09	327.495	1807.88	266.877	328.56	556.561	1917.39	432.777	1072.42	7167.32	2711.51	971.571	2377.4	257.023	1733.68
	25			474.142	420.684	448.557	1078.14	2834.6	1275.62	1400.75	1992.68	3254.6	2520.93	1978.76	777.785			0	153.456	1401.89	1018.26	2611.92	1320.76	2704.06	3435.23	563.634	687.553	748.21	775.568	1944.7	342.293	2265.38	1718.52	314.423	1838.68	427.031	2064.69	783.971	1162.27	631.927	2745.88	489.674	1439.06	7200.56	3723.08	889.776	1187.98	541.562	2519.62
	26			382.932	745.182	402.557	1067.14	3344.63	425.64	1479.53	2900.19	3540.6	2658.93	2396.42	805.118			741.732	246.956	2742.12	5185.41	3854.55	2651.66	2835.62	1506.31	712.714	686.928	931.074	879.078	2340	1434.72	1717.21	1350.08	328.425	1782.91	313.495	1582.88	584.458	1468.61	492.317	1594.24			7842.99	3293.29	1112.96	1539.21	432.176	2788.84
	27			389.599	501.55	427.557	847.145	2528.34	785.712	1460.08	2084.1	3464.6	2544.93	0	740.785			228.399	193.956	1227.86	1434.88	4138.41	2130.39	2257.02	2530.26	1050.45	589.434	366.912	603.743	2207.99	1459.67	1675.38	1375.52	370.08	3599.11	519.671	2630.31	66.9706	286.267	726.255	2810.34			7662.43	3229.51	903.219	1867.22	287.211	1962.86
	28			295.142	366.684	284.757	742.52			1329.86	1681.06	2957.6	2551.93	2574.99	953.153			0	145.956	2387.24	1994.07	4398.75	1435.08	2606.09	2002.28	435.267	758.152	1127.07	550.526	2103.2	852.793	1863.38	1273.52	343.925	2539.53	428.495	1606.38	182.971	299.267	543.354	2241.69			7684.32	3262.51	1056.89	1708.53	25.3949	2493.07
	29			406.142	336.684	91.5566	394.145			1326.94	2634.28	3125.6	2536.93	4844.76	778.785			0	121.706	1246.46	1958.56	4969.81	1963.94	1657.27	1209.94	1069.04	675.777	729.004	1255.88	2066.17	1272.71	1606.38	1310.52	297.925	2514.53	388.495	1440.88	382.971	1167.27	465.407	1955.37			6644.21	4425.91	1264.49	1930.58	639.878	4013.87
	30			202.142	547.684	62.5566	389.145			1449.32	2116.11	3370.6	2527.93	3357.76	774.785			0	124.956	1306.22	1312.81	3718.02	2004.34	2103.07	2105.23	918.225	506.875	970.268	795.615	1675.2	840.793	1816.84	2111.14	448.925	2540.53	374.949	1821.33	255.971	287.267	498.02	2194.69			3512.49	3004.09	1013.55	1471.22
	31			89.1422	336.684	274.994	442.77			1476.75	1958.68	3267.6	2568.93	2584.19	894.22			704.327	406.146	907.39	1046.62	5353.75	1360.08	2344.51	1832.41	884.38	872.928	1044.42	890.765	2100.45	1142.04			292.501	1442.58	349.514	1697.34	254.971	280.6	506.071	2721.22			5396.32	1030.85	701.159	1435.62
	32			324.405	814.646	172.557	434.145			1406	2017.21	2832.29	2631.93	0	733.778			1042.77	205.498	3313.16	2478.72	4208.3	1188.3	2421.51	2635.63	978.714	843.428	659.554	676.446	2010.2	583.253			384.265	1902.99	509.495	2186.21	469.971	1178.27	510.76	2960.08			5407.99	1076.18	671.619	1250.32
	33			513.377	761.632	227.132	1027.65			783.583	1484.06	3077.6	2748.93	0	1271.72			295.399	306.956	1588.57	2325.45	4131.92	1913.43	2975.61	2907.27	824.458	801.048	826.268	931.326	1754.1	379.293			269.877	695.833	507.758	2697.18	341.471	1167.52	578.154	2288.69			3842.04	1397.9	538.219	1236.22
	34			430.573	810.448	52.5566	642.145			1370.52	2190.38	3045.6	2641.93	2648.76	870.785			463.399	217.956	1378.28	834.727	4463.38	2142.92	3018.44	1165.62	820.569	898.902	546.115	665.902	2028.2	1058.29			191.205	967.946	336.495	1314.88	216.221	288.017	719.394	3835.86			5968.82	2155.01	511.219	1205.22
	35			703.273	1493.09	265.557	540.145			1524.25	1955.18	2700.18	2809.03					1066.8	217.956	1071.17	1165.97	4605.95	1936.68	1234.53	1254.48	901.714	440.928	1140.96	1193.43	1805.6	1175.19			546.584	4655.8	345.893	1619.26	721.09	1383.89	397.478	1496.38			4359.46	3228.37	806.92	1676.35
	36			938.142	1002.68	503.557	480.145			1433.52	2824.16	2247.1	3420.97					1042.4	168.956	1710.5	1640.41	3621.2	1326.77	1527.46	940.369	715.605	555.964	1013.07	916.526	1708.2	391.793			294.305	735.393	349.495	1987.88	206.721	390.767	282.354	1369.19			4890.32	2160.51	699.019	1834.03
	37			681.142	1032.68	384.557	1078.14			1269.75	1826.68	2019.35	2664.43					965.464	324.513	1299.13	1733.91	3220.25	2085.39	2099.28	1395.18	913.528	571.528	996.726	965.526					209.125	214.532	375.892	1627.79	209.425	319.721	565.731	2851.72			4452.32	2229.51
	38			490.344	669.255	406.131	978.466			1080.09	1287.28	3265.6	2606.93					1341.08	271.889	1933.07	2383.72	3452.01	2404.14	2053.65	1822.87	820.001	850.525	1069.07	931.526					238.907	1500.26	352.824	2113.76	404.724	734.404
	39			349.142	475.684	255.119	1175.03			1438.28	1598.04	0	0					864.399	161.956	1418.81	1703.81	4132.3	1545.86	2007.52	2812.23	590.714	644.928	1110.07	705.526					356.425	3382.28	370.295	1841.58	343.53	794.057
	40			261.696	834.55	334.792	1166.14			1416.93	2193.72							119.876	302.195	1933.3	2913.09	4058.75	1339.08	1614.71	1755.3	1158.07	1209.8	659.598	870.349					330.925	3372.53	425.776	2336.26	342.241	397.97
	41					415.421	1762.27			1421.75	1825.68							908.399	170.956	1349.67	1334.21	3864.2	1297.81	1704.44	1888.44	1112.71	469.928							192.671	421.171	369.465	2397.74	226.971	535.267
	42					384.077	1586.2			1456.68	2637.47							1422.4	237.956			4140.61	2182.85	1795.71	2053.97	984.095	516.055							353.425	3333.53	336.574	1757.93	312.471	676.767
	43					409.521	1029.96			1241.09	2595.02							411.399	226.956			2615.1	2128.13			770.714	473.928							427.81	3494.84			290.685	675.981
	44					309.755	1026.61			1152.87	1521.95							654.399	231.956							804.714	667.928							390.113	2788.97			424.971	686.267
	45					278.557	542.145			1365.75	1884.68							546.399	214.956							694.714	671.928							236.428	948.474			411.171	678.467
	46					206.557	598.145			1458.78	3877.94							1257.4	315.956							694.714	686.428							241.925	2763.2			300.971	696.267
	47					285.633	1263.47			1435.75	1842.68							720.399	165.956							586.992	691.813											438.971	634.267
	48					409.225	1374.61			1350.25	2607.58							540.326	172.307							798.269	668.039											479.778	789.184
	49					337.057	742.645			1448.12	2175.23							1206.9	312.956							605.714	685.928											299.664	538.371
	50					370.557	730.145			1426	3835.99							923.399	314.956							580.656	827.941											409.696	817.493
	51									1406.55	2640.28							682.399	155.956							768.317	706.119											165.971	441.267
	52									1380.53	2605.35							994.732	326.623							848.278	773.542											387.803	632.404
	53									1404.3	2973.28							649.399	146.956							669.714	633.928											238.971	480.267
	54									1284.4	2656.98							819.399	152.956							974.714	650.928											299.626	408.198
	55									1222.97	1664.76							804.399	190.956							1191.71	965.928											326.167	482.267
	56									1303.25	2543.68							764.301	233.428							976.224	692.167											325.971	401.267
	57									1374.1	2596.38							924.399	306.956							1003.71	600.928											456.284	494.252
	58									1284.75	1074.68							652.399	213.956							857.714	565.928
	59									1088.41	1737.91							809.399	185.956							990.714	641.928
	60									1252.57	2262.56							840.399	311.956							891.023	584.06
	61																	0	182.956							977.35	773.918
	62																	122.899	193.456							757.257	485.798
	63																	772.399	182.956							723.714	646.024
	64																	243.899	152.956							782.944	714.097
	65																	472.732	313.623
	66																	986.399	309.956
	67																	720.399	200.956
	68																	615.399	271.956
	69																	814.399	277.956
	70																	347.399	227.956
	71																	340.399	206.956
	72																	492.399	208.956
	73																	0	234.956
	74																	0	224.956
		837.324	2470.2	475.47	783.346	308.627	954.975	3036	1311.96	1328.32	2111.75	2567.18	2853.77	2832.49	947.564	2366.22	5587.49	562.083	239.341	1759.87	2097	3360.76	1741.35	2228.96	1936.89	863.832	722.817	825.529	807.91	1876.9	968.788	2117.65	1759.25	296.771	1780.87	412.816	1976.47	362.782	677.471	566.133	2487.69	573.961	1736.17	6020.46	3036.87	958.06	1699.1	504.328	2604.45
[truncated: 28 more columns]
