# Supplementary material for: Centromere protection requires strict mitotic inactivation of the Bloom syndrome helicase complex
Source: Research Square preprint supplement (doi:10.21203/rs.3.rs-4420374/v1), 2024-05-30
Supplement: Supplementary file 22 [file Fig 4. GFPBLM_Kinases_K-chromatin recruitment + CEN unwinding (and Fig S5A).xlsx]

## Sheet: Fig 4 Kinase inhibition_GFPBLM
		PLK1i	CDK1i	MPS1i	AurAi	AurBi
		BI2536 100nM	RO3306 7.5-9µM	Reversine 1µM	MLN8237 50nM	AZD1152 100nM
deltaBLM + GFP-BLM
Fig 4A		BLM recruitment to CEN
	deltaBLM + GFP-BLM_STB_Rel_MG132_+Kinases inhibitor (20-30min)
		DMSO	PLK1i	CDK1i	MPS1i	AurAi	AurBi
	Exp1	0	0.968254	0.971429	0.0461538	0.015873	0.0178571
	Exp2	0.016129	0.984848	0.972973	0.0178571	0.0338983	0.0192308
	Exp3	0	1	0.984848	0	0	0
Fig 4B		Centromere dislocation (RPA positive threads)
	deltaBLM + GFP-BLM_STB_Rel_MG132_+Kinases inhibitor (20-30min)
		DMSO	PLK1i	CDK1i	CDK1i + MPS1i	CDK1i+ AurAi	CDK1i+AurBi
	Exp0	0	0.673077	0.0666667
	Exp1	0	0.816667	0.0352941
	Exp2	0	0.569231	0.0757576
	Exp3	0	0.7125	0.0958904	0.488372
	Exp4	0	0.555556	0.0666667	0.466667	0.05	0.0338983
	Exp5	0	0.661765	0.04	0.388889	0.031746	0.0416667
	Exp6	0	0.7215	0.0226	0.208	0.041	0.028
Fig 4C		Centromere dislocation (RPA positive threads)
WT vs S144A	deltaBLM + GFP-BLM/S144A_STB_Rel_MG132_+Kinases inhibitor (20-30min)
		GFP-BLM WT			GFP-BLM S144A
		DMSO	PLK1i	CDK1i	DMSO	PLK1i	CDK1i
	Exp1	0	0.816667	0.0352941	0.0416667	0.548387	0.538462
	Exp2	0	0.569231	0.0909091	0.0566038	0.809524	0.6
	Exp3	0	0.7125	0.109589	0	0.672414	0.714286
Fig 4D	deltaBLM + GFP-BLM/12A3E_STB_Rel_MG132_+Kinases inhibitor (20-30min)
WT vs 12A3E, 12A, 6A		GFP-BLM WT			GFP-BLM 12A3E			GFP-BLM 12A			GFP-BLM 6A
		DMSO	PLK1i	CDK1i	DMSO	PLK1i	CDK1i	DMSO	PLK1i	CDK1i	DMSO	PLK1i	CDK1i
	Exp1	0	0.783	0.132	0	0.961	0.57
	Exp2	0	0.6545	0.0328	0	0.7143	0.6563
	Exp3	0	0.6	0.0571	0	0.7083	0.57
	Exp4	0	0.765	0.107	0	0.785	0.607	0	0.832	0.716	0	0.795	0.52
	Exp5	0	0.85	0.076				0	0.788	0.518	0	0.837	0.552
	Exp6	0	0.825	0.0962				0	0.721	0.615	0	0.752	0.605
Fig S5A
RPE1 GFP-BLM		BLM recruitment to CEN (RPE1 cells)
	RPE1 + GFP-BLM_STB_Rel_MG132 + Kinases inhibitor (15-20 min)
		DMSO	PLK1i	CDK1i	MPS1i	AurAi	AurBi
	Exp1	0	0.892308	0.918605	0.0277778	0.0147059	0.0166667
	Exp2	0	0.971429	0.986667	0.0454545	0.0322581	0.0298507
