# Supplementary material for: Centromere protection requires strict mitotic inactivation of the Bloom syndrome helicase complex
Source: Research Square preprint supplement (doi:10.21203/rs.3.rs-4420374/v1), 2024-05-30
Supplement: Supplementary file 25 [file Fig 5. RIF1 KO GFP RIF1 WT and PP1bs.xlsx]

## Sheet: Fig 5AC RPE1 RIF1KO PLK1i CDK1
		Centromere disintegration			BLM recruitment to CEN
	STB_Release + BI2536 2 hours
		RPE1	RIF1KO		RPE1	RIF1KO
	Exp1	0.602	0.173		0.92	0.173
	Exp2	0.515	0.148		0.88	0.148
	Exp3	0.66	0.12		0.95	0.12
	Exp4	0.724	0.234		0.92	0.234
	Total	282	295		282	295
		BLM recruitment to CEN
	STB_Release + MG132 + PLK1i CDK1i
		RPE1			RIF1KO
		DMSO	PLK1i	CDK1i	DMSO	PLK1i	CDK1i
	Exp1	0	0.95	0.94	0	0.12	0.94
	Exp2	0	0.98	0.92	0	0.09	0.95
	Exp3	0	1	0.99	0	0.16	0.89
	Total	184	195	198	175	202	210

## Sheet: Fig 5D WT PP1bs Cen unwinding
		Centromere disintegration
	STB_Release + BI2536 2 hours
		RIF1WT	RIF1PP1bs	Total
	Exp1	0.514286	0.1	70-70
	Exp2	0.440678	0.125	60-80
	Exp3	0.545455	0.261905	88-84

## Sheet: Fig 5D WT PP1bs intensity EGFP
Intensity_IntegratedIntensity_GFP				Intensity_MeanIntensity_GFP			Intensity A.U.
WT	PP1bs			WT	PP1bs		WT	PP1bs
1512.66	473.082			0.130684	0.036405		8564.35	2385.8
628.675	342.451			0.0523764	0.0409876		3432.49	2686.12
1645.88	524.663			0.10963	0.0402781		7184.63	2639.63
627.082	331.475			0.0593322	0.0382632		3888.34	2507.58
918.177	2205.16			0.0764128	0.149331		5007.71	9786.38
811.353	1379			0.0658459	0.0767988		4315.21	5033.01
833.129	353.627			0.0659017	0.0390059		4318.87	2556.25
1270.12	588.765			0.104657	0.0441154		6858.7	2891.11
1174.64	700.58			0.103374	0.0536309		6774.62	3514.7
281.776	882.424			0.0516169	0.0630168		3382.71	4129.8
598.706	1482.49			0.0679267	0.119469		4451.58	7829.4
674.91	868.31			0.0780965	0.0969096		5118.05	6350.97
816.996	367.047			0.0663146	0.0350738		4345.93	2298.56
2777.25	905.973			0.287768	0.0730152		18858.9	4785.05
1970.05	450.624			0.174883	0.0479387		11460.9	3141.66
791.443	861.455			0.0640119	0.0713361		4195.02	4675.01
792.027	498.349			0.064403	0.0433347		4220.65	2839.94
410.439	3616.03			0.0494088	0.252534		3238.01	16549.8
536.51	408.306			0.0581267	0.0485789		3809.34	3183.62
1095.79	466.776			0.0802952	0.0512041		5262.14	3355.66
2361.87	872.027			0.201473	0.0695563		13203.5	4558.37
1123.31	1318.15			0.0838726	0.10778		5496.59	7063.38
486.765	324.949			0.0548715	0.0349897		3596	2293.05
447.706	500.176			0.0594642	0.0579176		3896.99	3795.63
1493.36	1271.86			0.195414	0.110876		12806.5	7266.28
379.831	426.627			0.0422645	0.0536638		2769.81	3516.86
751.71	581.498			0.070168	0.0478402		4598.46	3135.21
978.133	1175.38			0.0812808	0.100649		5326.74	6596.06
1097.71	1733.44			0.112402	0.129623		7366.24	8494.82
1746.19	537.576			0.123931	0.0500164		8121.84	3277.83
1128.99	494.126			0.0743979	0.0402186		4875.67	2635.72
869.596	921.729			0.0775248	0.0712365		5080.59	4668.49
338.361	1751.27			0.0511273	0.15691		3350.63	10283.1
526.949	5062.15			0.0584265	0.337364		3828.98	22109.1
253.369	335.149			0.0419415	0.0349551		2748.64	2290.78
1179.12	537.443			0.195186	0.0802034		12791.5	5256.13
1158.36	1643.02			0.0849179	0.134365		5565.09	8805.61
899.129	718.149			0.0722424	0.0582346		4734.41	3816.4
976.561	1066.96			0.0781499	0.120888		5121.55	7922.39
1898.3	439.208			0.169567	0.0419732		11112.6	2750.72
568.471	1681.15			0.0515807	0.0655315		3380.34	4294.61
711.004	486.941			0.0994829	0.0410159		6519.61	2687.98
1458.13	394.722			0.12756	0.0378303		8359.62	2479.21
732.969	1113.08			0.0617861	0.074955		4049.15	4912.18
309.098	367.051			0.0409673	0.0403131		2684.79	2641.92
396.647	1019.64			0.0509633	0.0591161		3339.88	3874.18
459.345	639.412			0.0484082	0.0493564		3172.43	3234.57
347.812	1312.12			0.0544221	0.0800221		3566.55	5244.25
395.106	489.329			0.0490571	0.08123		3214.96	5323.41
483.678	606.38			0.0524142	0.0615053		3434.97	4030.75
1970.44	702.396			0.205254	0.0555254		13451.3	3638.86
1520.84	625.969			0.131926	0.0531834		8645.75	3485.37
1875.11	806.275			0.170247	0.0924733		11157.2	6060.24
442.737	480.639			0.0547942	0.0513888		3590.94	3367.76
1255.15	436.839			0.100556	0.0483711		6589.96	3170
2781.42	437.788			0.285274	0.0502743		18695.4	3294.72
911.478	228.486			0.0557991	0.0416946		3656.79	2732.45
2041.75	1036.45			0.145923	0.0674817		9563.04	4422.41
1651.57	766.337			0.158988	0.0864063		10419.3	5662.64
595.396	806.075			0.0582864	0.0554194		3819.8	3631.91
476.184	550.106			0.0627963	0.0479981		4115.36	3145.55
962.835	677.51			0.096245	0.0725618		6307.42	4755.34
774.796	475.867			0.0701808	0.044374		4599.3	2908.05
1342.61	894.824			0.165468	0.0794834		10843.9	5208.94
1131.94	619.78			0.110229	0.068018		7223.83	4457.56
957.706	707.914			0.0781609	0.0753982		5122.28	4941.22
1677.83	554.843			0.150626	0.0451459		9871.3	2958.64
1344.6	467.855			0.113669	0.0490157		7449.33	3212.24
1051.33	560.624			0.0951168	0.0428317		6233.48	2806.97
1194.8	274.808			0.0917383	0.0357032		6012.07	2339.81
487.584	678.247			0.0571812	0.0629639		3747.37	4126.34
814	530.561			0.0490953	0.0548043		3217.46	3591.6
495.702	1031.35			0.0524997	0.0860461		3440.57	5639.03
709.733	291.267			0.058709	0.0371419		3847.5	2434.09
1325.85	409.451			0.10491	0.0373144		6875.27	2445.4
473.004	400.529			0.0481135	0.0383759		3153.12	2514.97
712.247	580.239			0.0546495	0.0450741		3581.46	2953.93
3488.08	310.937			0.142006	0.0394941		9306.33	2588.25
683.545	971.945			0.0641706	0.0693355		4205.42	4543.9
501.227	1330.64			0.055421	0.144666		3632.01	9480.67
660.153	2055.34			0.0466737	0.126187		3058.76	8269.69
1990.7	1016.67			0.122347	0.0831768		8017.99	5450.99
808.698	1303.19			0.0714145	0.0667651		4680.15	4375.45
496.588	686.871			0.0475204	0.0534738		3114.25	3504.4
1459.09	920.169			0.133116	0.0745498		8723.77	4885.62
1313.12	839.278			0.100877	0.0818569		6611	5364.49
1122.39	702.604			0.105409	0.0430544		6907.96	2821.57
764.718	814.118			0.0659751	0.0554123		4323.68	3631.45
623.255	515.059			0.0588587	0.0425563		3857.31	2788.93
441.592	2203.65			0.0545849	0.157101		3577.22	10295.6
426.278	968.047			0.0495846	0.0717816		3249.52	4704.21
1169.42	850.522			0.10829	0.0740872		7096.76	4855.31
2020.37	712.086			0.104709	0.056885		6862.13	3727.96
882.145	756.498			0.0777015	0.078589		5092.17	5150.33
768.682	337.929			0.0643734	0.0423046		4218.71	2772.43
458.722	813.373			0.0592817	0.0473883		3885.02	3105.59
2245.02	790.961			0.177206	0.0774237		11613.2	5073.96
2253.36	756.655			0.18268	0.0736834		11971.9	4828.84
875.718	2207.25			0.097194	0.107687		6369.61	7057.25
2019.87	827.667			0.155483	0.102523		10189.6	6718.83
1685.53	1813.05			0.11425	0.155881		7487.37	10215.7
1685.89	200.624			0.138688	0.0337693		9088.89	2213.07
974.737	1418.18			0.0717933	0.121869		4704.97	7986.66
1682.31	1616.87			0.0951802	0.149199		6237.63	9777.79
1430.67	418.008			0.120326	0.0508711		7885.56	3333.84
1158.83	369.965			0.0884537	0.0420558		5796.81	2756.13
1447.04	597.992			0.0985386	0.0469234		6457.73	3075.13
1544.32	350.471			0.160482	0.0409668		10517.2	2684.76
1815.52	609.878			0.178587	0.0520152		11703.7	3408.82
653.392	906.561			0.0590077	0.140226		3867.07	9189.71
1051.64	227.314			0.100964	0.0435717		6616.69	2855.47
2594.47	612.475			0.214171	0.0457822		14035.7	3000.34
420.043	521.875			0.0601609	0.04166		3942.64	2730.19
421.761	330.188			0.0594197	0.041145		3894.07	2696.43
1014.4	1930.95			0.0865016	0.13956		5668.88	9146.05
488.726	395.494			0.0759362	0.0394272		4976.48	2583.86
855.376	574.51			0.0881922	0.0468988		5779.68	3073.51
670.733	831.71			0.0909592	0.0694713		5961.01	4552.8
947.89	1029.34			0.0787873	0.0837609		5163.33	5489.27
2998.17	1061.96			0.236468	0.0857945		15496.9	5622.54
787.831	638.482			0.0978551	0.0578231		6412.93	3789.44
2175.29	1353.82			0.126854	0.119142		8313.37	7808
738.416	2209.2			0.0858923	0.145745		5628.95	9551.39
1387.65	1527.8			0.150913	0.118848		9890.1	7788.73
722.212	497.122			0.0996429	0.0416838		6530.1	2731.75
869.659	469.753			0.060956	0.0481403		3994.75	3154.87
1719.15	832.208			0.134962	0.0533672		8844.75	3497.42
1153.84	1826.8			0.0714366	0.155116		4681.59	10165.5
965.494	1309.11			0.100051	0.0980313		6556.86	6424.48
1826.42	454.459			0.132196	0.04396		8663.46	2880.92
772.706	674.024			0.088138	0.0706672		5776.12	4631.17
515.137	1981.41			0.0599485	0.136753		3928.72	8962.1
970.282	863.969			0.0924255	0.0646732		6057.1	4238.36
1309.76	352.145			0.0990289	0.0439522		6489.86	2880.41
904.847	388.992			0.125603	0.0521297		8231.42	3416.32
1057.69	620.949			0.113547	0.0662204		7441.33	4339.76
1157.71	3143.74			0.0923874	0.281243		6054.61	18431.3
1822.2	437.514			0.172247	0.0391371		11288.2	2564.85
640.475	697.804			0.0612074	0.0670836		4011.23	4396.33
1185.43	1693.11			0.104989	0.158324		6880.46	10375.7
1378.82	1188.62			0.0861385	0.101383		5645.09	6644.14
2684.93	583.333			0.179955	0.046648		11793.4	3057.08
1280.1	427.082			0.120446	0.0520261		7893.44	3409.53
2068.87	725.388			0.169594	0.0664701		11114.3	4356.12
622.157	602.851			0.059073	0.0755642		3871.35	4952.1
3194.97	583.49			0.261883	0.0746342		17162.5	4891.15
1870.13	527.918			0.193155	0.08373		12658.4	5487.25
1103.76	463.855			0.0860032	0.0617075		5636.22	4044
443.137	578.102			0.0623698	0.0492673		4087.4	3228.73
419.031	695.894			0.0617403	0.0403534		4046.15	2644.56
4185.37	670.627			0.191612	0.0456364		12557.3	2990.78
543.435	1020.97			0.0567201	0.0516841		3717.15	3387.12
946.035	854.769			0.0864117	0.0702819		5662.99	4605.93
1018.79	429.631			0.0992878	0.041797		6506.83	2739.17
537.196	1775.31			0.0651463	0.108132		4269.36	7086.41
895.604	402.643			0.0851901	0.0414669		5582.94	2717.53
1304.16	1057.13			0.125775	0.0732439		8242.64	4800.04
917.067	577.184			0.0835368	0.0417523		5474.58	2736.24
775.408	596.698			0.050479	0.0475229		3308.14	3114.42
818.365	1276.27			0.0677118	0.111738		4437.49	7322.77
536.62	985.545			0.0664298	0.0846761		4353.47	5549.25
532.969	1705.65			0.0763019	0.0831131		5000.44	5446.82
1114.95	686.176			0.0827725	0.0644116		5424.49	4221.21
639.761	494.349			0.0613738	0.0462787		4022.13	3032.87
1400.64	562.341			0.109923	0.0471012		7203.83	3086.78
772.894	544.91			0.0611322	0.0418004		4006.3	2739.39
516.404	403.263			0.0546748	0.0420328		3583.12	2754.62
2567.79	985.753			0.226177	0.0543684		14822.5	3563.03
860.122	403.796			0.0740144	0.042084		4850.54	2757.98
1084.02	625.49			0.0929691	0.0534516		6092.73	3502.95
10323.6	1148.12			0.726199	0.114263		47591.4	7488.25
749.522	893.024			0.0655062	0.067505		4292.95	4423.94
529.02	610.518			0.0698929	0.0530193		4580.43	3474.62
865.412	599.725			0.0742843	0.0514653		4868.22	3372.78
699.322	489.486			0.0652048	0.0603633		4273.2	3955.91
1490.79	412.89			0.13028	0.0488454		8537.89	3201.08
943.38	567.612			0.118011	0.0378686		7733.85	2481.72
1706.53	698.365			0.115259	0.05505		7553.5	3607.7
755.89	1637.89			0.0776866	0.114778		5091.19	7522
655.443	625.722			0.0534968	0.0619159		3505.91	4057.66
1399.93	748.631			0.137302	0.0515657		8998.08	3379.36
708.969	529.067			0.0751583	0.0428706		4925.5	2809.53
1411.45	632.063			0.121877	0.0612345		7987.19	4013
1540.35	928.396			0.104964	0.084193		6878.81	5517.59
801.369	298.863			0.0734864	0.0349547		4815.93	2290.76
647.38	644.812			0.0838684	0.0748042		5496.32	4902.29
715.773	767.09			0.0739664	0.066237		4847.39	4340.84
940.976	660.737			0.0932214	0.0459867		6109.26	3013.74
1696.71	685.643			0.111817	0.0944542		7327.9	6190.06
3217.42	560.067			0.324992	0.0481819		21298.4	3157.6
583.522	391.843			0.0780005	0.0386357		5111.76	2531.99
1875.93	339.584			0.179275	0.0420278		11748.8	2754.29
624.098	529.976			0.0917521	0.0498614		6012.98	3267.66
1007.47	339.961			0.102562	0.0419653		6721.43	2750.2
1511.27	696.467			0.134097	0.0694384		8788.03	4550.64
1426.12	1005.54			0.1073	0.0589345		7031.89	3862.28
804.145	789.941			0.0700109	0.0587623		4588.16	3850.99
1075.1	713.376			0.0808591	0.0501954		5299.1	3289.55
1508.43	837.973			0.158448	0.0692368		10383.9	4537.43
1164.51	1231.69			0.0785875	0.0501218		5150.23	3284.73
891.247	1216.51			0.0934319	0.0789531		6123.06	5174.19
637.22	1072.54			0.0808552	0.0933944		5298.84	6120.6
1095.2	4563.69			0.101127	0.33468		6627.35	21933.2
530.961	687.616			0.0798437	0.0479475		5232.56	3142.24
656.537	1811.71			0.0799777	0.133135		5241.34	8725.03
543.867	1188.95			0.0717313	0.111659		4700.91	7317.57
1685.13	725.831			0.154684	0.0648585		10137.2	4250.5
733.11	438.647			0.0601995	0.0442541		3945.18	2900.2
602.522	823.6			0.0778351	0.0701892		5100.92	4599.85
507.176	923.106			0.0595138	0.062929		3900.24	4124.05
493.235	1810.17			0.0615007	0.152064		4030.45	9965.51
692.227	1630.94			0.112667	0.124224		7383.65	8141.04
660.388	582.996			0.115878	0.0596843		7594.06	3911.41
786.012	1004.79			0.0648846	0.0851447		4252.21	5579.96
943.016	686.314			0.0751886	0.061147		4927.49	4007.27
1141.2	2310.6			0.134974	0.232291		8845.51	15223.2
3280.98	333.761			0.223439	0.0508317		14643.1	3331.25
1263.84	1862.6			0.0844758	0.225769		5536.12	14795.8
1024.87	707.035			0.081088	0.050582		5314.1	3314.89
907.298	682.569			0.0684031	0.0520727		4482.79	3412.58
2765.86	469.106			0.242195	0.0476685		15872.2	3123.96
2329.6	923.941			0.293252	0.0718461		19218.3	4708.44
1953.06	603.878			0.309911	0.0731885		20310	4796.41
934.326	379.984			0.0771787	0.0470219		5057.91	3081.58
1376.22	730.494			0.115329	0.0594526		7558.06	3896.23
517.459	591.502			0.0545153	0.0534232		3572.66	3501.09
1097.37	611.698			0.084452	0.0533489		5534.56	3496.22
1413.84	1018.58			0.10648	0.0872748		6978.14	5719.55
964.722	697.196			0.0814386	0.102574		5337.08	6722.19
378.451	354.42			0.0404112	0.0428405		2648.35	2807.55
796.961	2580.76			0.0598993	0.177043		3925.5	11602.5
887.526	790.49			0.08029	0.0560234		5261.8	3671.49
1047.27	898.478			0.0970144	0.0702375		6357.84	4603.02
538.251	671.051			0.0562259	0.0745695		3684.77	4886.91
627.922	642.804			0.0661667	0.0503449		4336.23	3299.35
1346.75	725.039			0.0995895	0.0680852		6526.6	4461.96
973.69	420.824			0.080831	0.0463003		5297.26	3034.29
862.416	1167.45			0.0689822	0.0938315		4520.75	6149.24
584.169	557.075			0.0677768	0.0443884		4441.76	2908.99
1235.72	4264.39			0.112033	0.343321		7342.07	22499.6
593.027	1174.58			0.0476213	0.083434		3120.86	5467.85
741.714	379.031			0.0698478	0.0377634		4577.48	2474.83
657.459	314.565			0.0671493	0.0537626		4400.63	3523.33
2451.41	383.094			0.192691	0.0385523		12628	2526.52
663.761	1139.33			0.0702392	0.118274		4603.13	7751.06
512.553	436.357			0.0580271	0.0403362		3802.8	2643.43
602.02	786.827			0.0589637	0.0561298		3864.19	3678.47
1607.06	253.835			0.172099	0.0411402		11278.5	2696.13
1115.26	1471.14			0.116076	0.131469		7607.07	8615.84
953.404	318.2			0.100528	0.0472598		6588.08	3097.17
521.075	489.173			0.0636233	0.0407508		4169.55	2670.6
749.451	281.729			0.0761328	0.0341325		4989.36	2236.87
2683.73	358.51			0.217465	0.0462414		14251.5	3030.43
1535.72	591.067			0.111059	0.0508795		7278.24	3334.39
856.043	765.573			0.0689912	0.0898243		4521.34	5886.64
1838.03	935.118			0.172569	0.0760567		11309.3	4984.38
734.482	4423.35			0.0513444	0.387911		3364.86	25421.7
1010.05	534.188			0.107498	0.049494		7044.88	3243.59
2058.09	756.796			0.18231	0.0496		11947.7	3250.53
630.533	423.757			0.0636003	0.0443539		4168.05	2906.73
2499.18	723.333			0.219341	0.0507104		14374.5	3323.31
687.714	454.075			0.0561949	0.0483367		3682.74	3167.74
1537.61	675.871			0.139529	0.0554356		9144.05	3632.97
811.82	1767.05			0.0546606	0.14932		3582.18	9785.7
948.11	2764.57			0.0988747	0.103689		6479.76	6795.29
430.541	411.918			0.0631292	0.044316		4137.17	2904.25
2056.77	1314.61			0.175928	0.0905003		11529.4	5930.94
2469.26	500.918			0.208782	0.0669497		13682.5	4387.55
798.745	1890.62			0.0637619	0.145983		4178.64	9566.96
1782.96	689.071			0.158613	0.0607432		10394.7	3980.8
492.576	2279.05			0.0503811	0.161555		3301.73	10587.5
1514.86	757.8			0.115691	0.0523559		7581.83	3431.15
778.008	870.541			0.0530303	0.0492722		3475.34	3229.05
438.02	357.125			0.0459718	0.0513406		3012.76	3364.61
620.58	623.906			0.0719514	0.0458518		4715.33	3004.9
963.482	419			0.0667278	0.0554746		4373	3635.53
1477.13	772.804			0.0989569	0.0806769		6485.14	5287.16
1900.91	599.655			0.170654	0.046395		11183.8	3040.49
1638.8	881.553			0.135003	0.0725916		8847.41	4757.29
1118.25	849.902			0.0790895	0.0764851		5183.13	5012.45
842.263	680.702			0.0706419	0.0487051		4629.51	3191.89
1491.52	601.439			0.116334	0.0506859		7623.97	3321.7
1037.79	769.98			0.0901018	0.0595361		5904.82	3901.7
837.851	1938.24			0.0845972	0.147238		5544.08	9649.23
914.251	388.478			0.0742509	0.0425683		4866.03	2789.71
1145.79	264.533			0.145645	0.0444968		9544.84	2916.1
604.792	291.514			0.0624076	0.0454071		4089.88	2975.76
1095.94	826.577			0.0890864	0.0648092		5838.28	4247.27
389.714	949.561			0.0446152	0.110311		2923.86	7229.26
648.726	864.726			0.0653825	0.0664764		4284.84	4356.53
1135.06	958.847			0.0896571	0.0570335		5875.68	3737.69
460.835	814.58			0.0479587	0.0619547		3142.97	4060.2
485.42	639.027			0.0719567	0.0543622		4715.68	3562.63
457.847	2011.63			0.0614807	0.186331		4029.14	12211.2
732.671	511.847			0.0638326	0.0461581		4183.27	3024.97
1232.06	921.898			0.120731	0.0904975		7912.12	5930.75
1427.54	522.608			0.0987576	0.0866823		6472.08	5680.73
331.192	4758.98			0.052379	0.456016		3432.66	29885
2084.85	675.11			0.227256	0.055129		14893.3	3612.88
581.529	1189.05			0.0518436	0.0874367		3397.57	5730.16
632.949	991.984			0.0506481	0.0551164		3319.22	3612.05
435.082	513.373			0.0471072	0.0744666		3087.17	4880.17
1433.19	1056.92			0.114986	0.0915556		7535.62	6000.1
1335.25	616.098			0.108734	0.0553249		7125.87	3625.72
361.114	707.976			0.0516024	0.0585298		3381.76	3835.75
1520.31	993.318			0.11758	0.0900723		7705.63	5902.89
1251.89	547.867			0.094184	0.0478737		6172.35	3137.4
2374.76	433.933			0.17742	0.0527258		11627.2	3455.39
443.267	1262.31			0.043706	0.101496		2864.28	6651.56
897.859	649.224			0.0945314	0.0724984		6195.11	4751.19
744.126	501.075			0.0575993	0.06899		3774.77	4521.26
765.949	1362.4			0.0778087	0.113043		5099.19	7408.3
597.49	527.749			0.0671036	0.050257		4397.63	3293.59
816.267	591.106			0.0877423	0.0462235		5750.19	3029.26
714.643	733.137			0.0640706	0.0531953		4198.86	3486.15
1005.19	957.777			0.0928752	0.0696362		6086.58	4563.61
941.357	488.784			0.105901	0.0406778		6940.24	2665.82
891.188	1544.58			0.0849803	0.102067		5569.18	6688.98
589.176	559.941			0.0664535	0.0470302		4355.03	3082.12
2507.94	632.118			0.218652	0.0537058		14329.4	3519.61
630.537	506.11			0.0648701	0.0412175		4251.26	2701.19
374.039	1511.31			0.0470076	0.139458		3080.64	9139.38
554.663	579.659			0.0516302	0.0392138		3383.58	2569.88
760.267	497.937			0.0858476	0.0558351		5626.03	3659.15
1049.72	1174.87			0.0861837	0.0877621		5648.05	5751.49
1965.78	482.114			0.234888	0.0495288		15393.4	3245.87
772.314	1787.98			0.0687112	0.0810471		4502.99	5311.42
706.651	1148.5			0.0627744	0.0933135		4113.92	6115.3
766.251	2108.27			0.0733816	0.078614		4809.07	5151.97
863.008	2868.6			0.0899529	0.269707		5895.06	17675.3
1577.24	739.424			0.164485	0.0579349		10779.5	3796.77
1191.83	2086.56			0.116378	0.176902		7626.86	11593.3
394.055	1923.95			0.0536494	0.120232		3515.91	7879.37
597.267	822.914			0.053114	0.0613565		3480.82	4021
596.784	554.957			0.0660306	0.0545091		4327.31	3572.25
660.114	454.337			0.0602844	0.0430121		3950.74	2818.8
2173.27	613.412			0.197857	0.056199		12966.6	3683
707.467	665.714			0.071231	0.0576276		4668.13	3776.62
1080.13	7906.51			0.0509567	0.822823		3339.45	53923.7
1728.87	425.506			0.135036	0.0500654		8849.61	3281.04
1727.86	312.945			0.202658	0.0428927		13281.2	2810.97
615.957	567.71			0.0481141	0.0436297		3153.16	2859.27
618.467	387.843			0.0620452	0.0475823		4066.13	3118.3
1069.47	260.208			0.0845295	0.0402487		5539.64	2637.7
1157.03	754.365			0.092666	0.0495673		6072.87	3248.39
1262.59	645.706			0.0925719	0.050863		6066.7	3333.31
840.451	1838.4			0.078849	0.131776		5167.37	8635.93
485.373	333			0.0464294	0.0412537		3042.75	2703.56
440.776	696.514			0.074355	0.0546028		4872.86	3578.4
695.545	395.027			0.0570633	0.0446359		3739.65	2925.21
688.31	363.761			0.0605693	0.0435485		3969.41	2853.95
458.227	578.494			0.0662083	0.0616995		4338.96	4043.47
390.871	459.125			0.0681791	0.0496406		4468.12	3253.19
834.02	410.02			0.0648538	0.0486266		4250.19	3186.75
786.514	650.145			0.0612454	0.0598715		4013.72	3923.68
1678.98	607.184			0.16056	0.049855		10522.3	3267.25
690.031	704.957			0.0590578	0.0490849		3870.35	3216.78
883.529	642.906			0.0820819	0.0508427		5379.24	3331.98
515.722	503.18			0.04751	0.0446042		3113.57	2923.14
1359.93	742.141			0.174082	0.0702985		11408.4	4607.01
1049.85	2320.43			0.0839945	0.179267		5504.58	11748.3
818.49	1104.38			0.079705	0.0760226		5223.46	4982.14
551.243	550.094			0.0553679	0.061415		3628.54	4024.83
512.318	533.369			0.0605433	0.0545311		3967.71	3573.7
1072.32	2088.69			0.104079	0.168988		6820.79	11074.6
672.557	789.231			0.0674581	0.0576628		4420.86	3778.93
1452.98	673.204			0.12035	0.0694454		7887.11	4551.11
1167.49	1471.29			0.0811205	0.117272		5316.23	7685.42
838.777	1374.88			0.0639701	0.0890696		4192.28	5837.18
1903.54	1717.04			0.162321	0.156293		10637.7	10242.7
742.475	626.937			0.0751797	0.0574118		4926.9	3762.48
1173.28	551.839			0.0986781	0.07313		6466.87	4792.58
1138.74	1335.01			0.0878049	0.122782		5754.29	8046.51
538.392	7844.83			0.0540554	0.88164		3542.52	57778.3
691.149	622.004			0.0565126	0.0617926		3703.55	4049.58
1493.56	1493.54			0.107862	0.152169		7068.72	9972.39
683.749	1242.79			0.0635336	0.105268		4163.68	6898.71
1034.16	1252.17			0.0827795	0.114468		5424.96	7501.68
711.478	2177.67			0.0777402	0.194175		5094.71	12725.2
559.949	1892.87			0.0607188	0.103628		3979.21	6791.25
517.196	361.808			0.0515238	0.038242		3376.61	2506.19
880.188	566.122			0.0859643	0.0443044		5633.67	2903.49
1094.77	351.804			0.102795	0.0401374		6736.68	2630.4
543.396	739.898			0.0535946	0.0429026		3512.32	2811.62
607.659	999.584			0.0542214	0.0874068		3553.4	5728.21
1070.8	1829.46			0.0908458	0.113216		5953.58	7419.62
1240.99	591.541			0.0782467	0.0448205		5127.9	2937.31
500.506	739.126			0.0545808	0.0592153		3576.95	3880.68
619.608	637.482			0.0605796	0.0523213		3970.08	3428.87
777.898	1495.25			0.0606643	0.131961		3975.63	8648.09
639.2	865.29			0.0523806	0.0736982		3432.76	4829.81
588.69	2381.27			0.0458839	0.206905		3007	13559.5
969.973	1576.89			0.0956486	0.129		6268.33	8454.01
1407.96	610.569			0.110741	0.0469921		7257.43	3079.63
1048.91	1809.66			0.0872565	0.145659		5718.35	9545.74
1505.86	497.965			0.131562	0.0461848		8621.94	3026.72
592.596	1471.4			0.0489627	0.0868444		3208.77	5691.34
846.176	1203.04			0.0820495	0.0517703		5377.11	3392.77
841.98	3440.63			0.0901671	0.281304		5909.1	18435.3
371.702	5644.01			0.0417502	0.436708		2736.1	28619.6
1461.27	418.012			0.0811952	0.0500253		5321.13	3278.41
391.145	408.741			0.0422997	0.0463268		2772.11	3036.03
456.863	719.071			0.0484478	0.0728911		3175.03	4776.92
862.541	2873.64			0.080891	0.25505		5301.19	16714.7
879.902	730.988			0.0735212	0.0669526		4818.21	4387.74
749.157	1303.9			0.069689	0.138037		4567.07	9046.26
755.573	845.678			0.0578185	0.064154		3789.14	4204.33
939.086	682.247			0.0704702	0.133382		4618.27	8741.17
829.714	736.463			0.0850204	0.0706236		5571.81	4628.32
1469.81	877.031			0.118038	0.042498		7735.63	2785.11
658.788	400.122			0.0716308	0.0538522		4694.32	3529.2
1115.15	476.624			0.0857342	0.0469025		5618.59	3073.76
1089.7	678.004			0.0742503	0.0503269		4866	3298.17
1051.09	231.98			0.0832616	0.0436381		5456.55	2859.83
1838.15	754.42			0.155921	0.0991353		10218.3	6496.83
1775.57	527.208			0.117385	0.0555658		7692.84	3641.5
628.161	855.18			0.0620222	0.0546511		4064.62	3581.56
1404.91	697.961			0.113026	0.0521606		7407.14	3418.34
771.533	381.773			0.0578361	0.0444335		3790.29	2911.95
572.184	1536.3			0.0636184	0.141062		4169.24	9244.47
2622.04	1002.4			0.162496	0.0742461		10649.2	4865.72
1384.1	517.639			0.118279	0.0469259		7751.4	3075.29
1786.77	3597.9			0.122701	0.300853		8041.2	19716.4
1239.57	796.345			0.0711333	0.0539054		4661.72	3532.69
384.039	586.114			0.0417253	0.0565747		2734.46	3707.62
405.208	594.659			0.0492654	0.0524483		3228.61	3437.2
1617.47	466.192			0.154413	0.046503		10119.4	3047.57
968.526	1407.11			0.0837173	0.0961078		5486.41	6298.42
466.192	751.322			0.0450776	0.059852		2954.16	3922.4
346.271	1093.2			0.0467113	0.0633705		3061.22	4152.98
805.333	1989.89			0.0554714	0.109666		3635.32	7186.98
1005.24	548.427			0.0727851	0.0490851		4769.97	3216.79
2417.87	913.086			0.199297	0.0719929		13060.9	4718.06
1525.41	742.345			0.123335	0.0533716		8082.76	3497.71
465.157	423.365			0.0432302	0.0439175		2833.09	2878.13
2235.05	1010.21			0.142106	0.0737432		9312.93	4832.76
603.157	1023.28			0.0443335	0.0617626		2905.39	4047.61
501.298	426.114			0.0546731	0.0419279		3583	2747.75
1651.6	756.431			0.106617	0.0696017		6987.13	4561.35
747.173	444.078			0.0573777	0.0470074		3760.25	3080.63
617.659	593.824			0.0644536	0.0484082		4223.97	3172.43
261.475	348.769			0.0360903	0.0409978		2365.18	2686.79
1286.8	556.447			0.108335	0.0487257		7099.74	3193.24
860.816	213.506			0.0740487	0.0355902		4852.78	2332.41
868.224	429.702			0.0681655	0.0447187		4467.22	2930.64
1974.7	372.18			0.177613	0.0364668		11639.8	2389.85
935.153	436.604			0.0815374	0.0450897		5343.56	2954.96
2396.39	332.867			0.200083	0.0384506		13112.4	2519.86
701.224	322.063			0.0537254	0.0358206		3520.89	2347.5
461.365	422.086			0.0704159	0.0567397		4614.7	3718.43
931.761	385.78			0.0865466	0.0541826		5671.83	3550.86
667.62	567.42			0.0676756	0.0498174		4435.12	3264.78
1363	741.796			0.125703	0.0638324		8237.96	4183.26
377.678	915.341			0.0615713	0.0795603		4035.08	5213.98
603.184	934.357			0.0753133	0.143196		4935.66	9384.38
503.051	574.62			0.0613477	0.0394358		4020.42	2584.43
411.51	683.208			0.0750793	0.0640788		4920.32	4199.4
770.526	1329.47			0.064029	0.124424		4196.14	8154.15
1852.49	703.173			0.127389	0.0578838		8348.42	3793.42
894.161	425.09			0.0795446	0.056975		5212.96	3733.85
436.18	402.988			0.0557562	0.0439512		3653.98	2880.34
483.298	598.498			0.0629458	0.057465		4125.15	3765.97
680.141	343.247			0.0522623	0.0448748		3425.01	2940.87
2430.14	592.027			0.208631	0.0748833		13672.7	4907.48
1381.08	1698.64			0.111638	0.0553052		7316.22	3624.42
513.333	358.471			0.0690428	0.0594577		4524.72	3896.56
725.663	421.612			0.0664587	0.0493575		4355.37	3234.64
1792.53	424.867			0.156992	0.0468018		10288.4	3067.16
568.655	824.969			0.050741	0.0784042		3325.31	5138.22
1175.18	825.208			0.10065	0.0509042		6596.07	3336.01
1052.63	562.89			0.0929394	0.0619787		6090.78	4061.77
1218.31	1494.29			0.0557428	0.125793		3653.1	8243.82
370.365	827.486			0.047337	0.0788533		3102.23	5167.65
1166.17	613.286			0.104683	0.0626826		6860.4	4107.9
1230.65	567.18			0.134837	0.0603127		8836.53	3952.59
1054.24	451.545			0.0908279	0.0525664		5952.41	3444.94
976.126	1482.85			0.114287	0.127634		7489.8	8364.51
1938.6	845.004			0.157405	0.104748		10315.5	6864.67
580.337	1059.01			0.0447239	0.0804353		2930.98	5271.33
932.926	720.792			0.0823557	0.0843328		5397.18	5526.75
410.6	395.098			0.0496674	0.0474877		3254.95	3112.11
717.494	1051.14			0.0768771	0.0803806		5038.14	5267.74
888.851	675.988			0.0954215	0.0563558		6253.45	3693.28
1173.09	681.788			0.120367	0.0656449		7888.23	4302.04
1119.63	1132.45			0.0906658	0.110461		5941.78	7239.07
808.263	1226.11			0.0799152	0.0978621		5237.25	6413.39
966.208	350.043			0.0919848	0.0454365		6028.22	2977.68
1446.73	393.8			0.152947	0.0537758		10023.4	3524.2
654.263	319.902			0.0652566	0.0484627		4276.59	3176
1602.53	396.612			0.104372	0.059187		6840.04	3878.82
1034.48	350.8			0.0758026	0.0542446		4967.73	3554.92
5662.21	805.4			0.44198	0.0646285		28965.2	4235.43
1864.65	558.526			0.297582	0.0649977		19502	4259.63
1187.84	2526.95			0.121245	0.213894		7945.8	14017.6
454.267	417.812			0.0457101	0.0424174		2995.61	2779.83
821.729	878.6			0.0908189	0.0722474		5951.82	4734.73
1728.31	1036.85			0.136216	0.0771524		8926.9	5056.18
2773.65	878.267			0.21086	0.0647689		13818.7	4244.63
726.682	430.18			0.0764366	0.0484219		5009.27	3173.33
515.333	1213.77			0.0468613	0.0987771		3071.05	6473.35
1203.32	471.957			0.0889699	0.0494817		5830.64	3242.79
938.776	1087.1			0.0803059	0.0691673		5262.85	4532.88
3078.73	1294.78			0.232656	0.0915236		15247.1	5998
376.051	537.38			0.067104	0.0506199		4397.66	3317.37
726.541	1018.42			0.068092	0.0989337		4462.41	6483.62
3502.59	1182.04			0.371509	0.0992643		24346.9	6505.29
441.294	708.596			0.0752035	0.0589269		4928.46	3861.78
1075.18	939.839			0.0871435	0.0824855		5710.95	5405.68
1405.45	442.804			0.0867025	0.049961		5682.05	3274.19
614.118	770.608			0.054989	0.0505516		3603.71	3312.9
886.067	413.365			0.0818689	0.050757		5365.28	3326.36
1570.38	518.745			0.115784	0.054743		7587.9	3587.59
581.376	803.314			0.0638314	0.0520888		4183.19	3413.64
1096.21	831.651			0.0977971	0.0668422		6409.13	4380.51
465.988	1128.9			0.0865988	0.0849306		5675.25	5565.93
4349.65	626.412			0.351657	0.0371405		23045.9	2434
1166.03	411.976			0.109117	0.0432249		7151	2832.74
503.129	680.98			0.0841213	0.0615937		5512.89	4036.55
876.204	501.302			0.0725875	0.0597499		4757.02	3915.71
344.431	570.416			0.0381895	0.0514027		2502.75	3368.68
938.255	3355.27			0.0825057	0.128722		5407.01	8435.81
1738.14	331.114			0.13684	0.0405628		8967.81	2658.28
2281.53	3258.05			0.122749	0.280939		8044.35	18411.3
1158.21	687.698			0.0794654	0.0626947		5207.76	4108.7
1051.2	765.251			0.105394	0.0805273		6907	5277.36
507.373	389.137			0.0490215	0.0533357		3212.62	3495.36
1763.52	1056.28			0.131842	0.110432		8640.26	7237.16
743.565	413.388			0.0686389	0.0523873		4498.25	3433.2
448.965	1201.51			0.044055	0.126795		2887.15	8309.49
822.039	1306.76			0.0708716	0.101638		4644.57	6660.83
929.933	556.243			0.0766955	0.0639507		5026.24	4191.01
352.357	796.976			0.0456835	0.0701564		2993.87	4597.7
459.831	3997.2			0.0451435	0.328285		2958.48	21514.2
1481.94	1341.14			0.115254	0.182518		7553.18	11961.3
3052.5	1931.75			0.287132	0.157501		18817.2	10321.8
685.192	741.357			0.07593	0.0572786		4976.07	3753.75
739.239	1722.67			0.0697527	0.133005		4571.24	8716.45
473.643	719.592			0.0428055	0.0857372		2805.26	5618.79
1026.96	685.118			0.136892	0.0519383		8971.23	3403.77
996.808	2002.85			0.132484	0.161834		8682.32	10605.8
770.592	1090.81			0.0662191	0.0753687		4339.67	4939.29
451.631	1207.76			0.0517926	0.0940847		3394.23	6165.84
3184.98	701.322			0.232872	0.0692937		15261.2	4541.16
724.875	909.416			0.0625539	0.0661971		4099.47	4338.23
3412.12	821.486			0.252694	0.0804669		16560.3	5273.4
1254.82	1341.16			0.0769262	0.127596		5041.36	8362.02
1290.26	871.157			0.0878926	0.0657031		5760.04	4305.85
707.035	339.329			0.0823571	0.0432212		5397.27	2832.5
847.659	413.231			0.071933	0.0551711		4714.13	3615.64
762.702	829.361			0.0699406	0.079145		4583.56	5186.77
438.455	366.443			0.0486739	0.0517283		3189.85	3390.01
691.373	653.314			0.0588903	0.0491583		3859.38	3221.59
644.596	936.663			0.0811527	0.0883978		5318.34	5793.15
1297.8	530.094			0.0956727	0.0527719		6269.91	3458.41
429.349	888.126			0.0400027	0.0960136		2621.58	6292.25
1138.1	613.278			0.0844916	0.0748722		5537.16	4906.75
1356.49	927.078			0.105506	0.0634681		6914.31	4159.38
430.294	770.447			0.0418696	0.0531746		2743.93	3484.8
534.102	487.4			0.0532664	0.0521953		3490.81	3420.62
390.243	693.608			0.0455519	0.0591563		2985.24	3876.81
1835.57	553.875			0.190412	0.0513894		12478.6	3367.8
668.314	595.027			0.0621283	0.0483998		4071.58	3171.88
666.024	759.071			0.0470854	0.0628838		3085.74	4121.09
1262.23	428.961			0.0630769	0.0435714		4133.74	2855.45
803.933	1590.93			0.0625386	0.110397		4098.47	7234.84
333.173	766.298			0.041956	0.0720544		2749.59	4722.08
546.51	1003.02			0.0467542	0.0860447		3064.04	5638.94
1332.18	890.145			0.127898	0.0668528		8381.79	4381.2
650.702	637.012			0.0527055	0.0521158		3454.05	3415.41
1357.73	1391.1			0.110304	0.115848		7228.76	7592.09
666.839	527.059			0.0547083	0.0506009		3585.31	3316.13
1265.18	1626.4			0.0858334	0.165739		5625.09	10861.7
785.749	1204.95			0.0721069	0.11391		4725.53	7465.12
273.573	343.004			0.0461337	0.0461213		3023.37	3022.56
1379.56	502.267			0.121751	0.0531443		7978.98	3482.81
1369.22	460.027			0.113093	0.0432641		7411.54	2835.31
583.188	913.424			0.0586708	0.0654221		3844.99	4287.44
1110.7	390.027			0.0686591	0.0500549		4499.57	3280.35
524.925	718.843			0.0544077	0.0593938		3565.61	3892.37
596.839	10535.6			0.044378	0.712972		2908.31	46724.6
1380.41	764.561			0.106096	0.105297		6952.98	6900.63
666.2	1804.9			0.0708347	0.152828		4642.15	10015.6
562.388	1492.47			0.0615843	0.126889		4035.93	8315.66
712.482	1868.49			0.0500128	0.180548		3277.59	11832.2
492.553	1047.54			0.042697	0.0815524		2798.15	5344.54
783.671	800.486			0.0641407	0.0667963		4203.46	4377.49
346.69	582.486			0.0425962	0.0596321		2791.54	3907.99
1422.55	733.776			0.14018	0.0638067		9186.71	4181.57
1165.69	607.278			0.102038	0.069111		6687.08	4529.19
928.545	1119.05			0.0674521	0.114142		4420.47	7480.29
855.812	1427.64			0.0591725	0.131241		3877.87	8600.85
615.404	296.345			0.0473497	0.044928		3103.06	2944.36
964.945	2747.36			0.0945006	0.214486		6193.09	14056.4
556.51	889.408			0.0709743	0.10528		4651.3	6899.54
1730.97	499.482			0.15709	0.040103		10294.9	2628.15
1132.2	886.059			0.103615	0.104316		6790.38	6836.34
2048.11	1308.25			0.163941	0.115448		10743.9	7565.87
426.298	624.659			0.0410929	0.0734893		2693.03	4816.12
521.553	1318.44			0.060351	0.119934		3955.1	7859.88
2323.67	865.541			0.18806	0.065314		12324.5	4280.35
421.365	524.588			0.0434128	0.0519189		2845.06	3402.5
764.282	666.376			0.0790038	0.0826667		5177.51	5417.56
603.831	1245.74			0.0539906	0.116599		3538.28	7641.3
870.506	1023.09			0.0599811	0.0792912		3930.86	5196.35
1611.88	787.859			0.10293	0.104866		6745.5	6872.4
604.796	324.749			0.0618591	0.0516458		4053.93	3384.61
1749.55	355.898			0.141732	0.0457453		9288.43	2997.91
562.373	897.31			0.0549783	0.0729936		3603	4783.63
727.953	1711.45			0.0732273	0.165742		4798.95	10861.9
1872.97	1554.66			0.137719	0.127212		9025.39	8336.84
617.102	751.596			0.054127	0.0617683		3547.21	4047.98
533.035	347.424			0.0415752	0.0433575		2724.63	2841.43
411.882	636.635			0.048594	0.0610799		3184.6	4002.87
510.224	1115.87			0.0451925	0.0975067		2961.69	6390.1
868.063	325.329			0.0578015	0.0590435		3788.02	3869.41
840.592	613.149			0.0695106	0.0490716		4555.38	3215.9
953.749	825.482			0.066182	0.0752628		4337.24	4932.35
372.792	2272.84			0.0434034	0.168708		2844.44	11056.3
1846.9	472.329			0.130875	0.0516376		8576.87	3384.07
460.384	308.427			0.0490188	0.0367176		3212.45	2406.28
825.961	761.965			0.0620277	0.0927416		4064.99	6077.82
1693.33	1533.16			0.127597	0.151963		8362.04	9958.91
1103.43	407.282			0.0807071	0.051607		5289.14	3382.06
498.216	976.6			0.0540716	0.0811871		3543.58	5320.6
681.553	683.133			0.0659589	0.0900756		4322.61	5903.1
1165.41	770.616			0.13512	0.097571		8855.07	6394.32
867.726	974.957			0.0708405	0.0845216		4642.53	5539.12
1197.82	352.224			0.0852053	0.040144		5583.93	2630.84
1560.77	1206.9			0.165916	0.136419		10873.3	8940.21
540.859	1013.02			0.0470558	0.0772534		3083.8	5062.8
1017.82	2591.18			0.0779643	0.206997		5109.39	13565.5
582.776	414.471			0.0579589	0.0391195		3798.33	2563.69
3772.03	714.902			0.308197	0.0890955		20197.7	5838.87
547.173	491.675			0.0423312	0.049579		2774.17	3249.16
1829.81	912.918			0.116831	0.0920002		7656.54	6029.23
844.839	512.965			0.0551858	0.0567879		3616.6	3721.59
396.796	420.106			0.0423069	0.0413694		2772.58	2711.14
694.004	360.337			0.0536242	0.0404147		3514.26	2648.58
1418.07	887.565			0.0605339	0.0717166		3967.09	4699.95
1492.73	1342.21			0.11882	0.0905063		7786.86	5931.33
798.322	2108.93			0.0670014	0.159478		4390.94	10451.4
621.204	1006.14			0.0523869	0.0832275		3433.18	5454.31
673.733	540.122			0.0675219	0.0424657		4425.05	2782.99
846.149	939.671			0.0767413	0.0967336		5029.24	6339.44
1519.85	1358.14			0.0922074	0.131475		6042.81	8616.22
907.322	1247.99			0.0931924	0.0885289		6107.37	5801.74
940.667	486.667			0.072398	0.049074		4744.6	3216.06
1105.55	391.984			0.0574847	0.041825		3767.26	2741
513.976	1363.87			0.0442587	0.131142		2900.5	8594.38
448.612	579.914			0.0456742	0.0476081		2993.26	3119.99
1320.82	462.588			0.11005	0.0669932		7212.12	4390.4
379.4	565.639			0.04224	0.0511243		2768.2	3350.43
823.459	2471.11			0.0610603	0.0840884		4001.59	5510.73
1131.35	607.149			0.0898823	0.0432905		5890.44	2837.04
705.898	773.569			0.127074	0.0693224		8327.82	4543.04
976.439	662.788			0.13256	0.0743703		8687.34	4873.86
758.643	491.129			0.0505762	0.0498103		3314.51	3264.32
455.914	702.486			0.0424976	0.0575148		2785.08	3769.24
627.396	1090.2			0.0434967	0.088368		2850.55	5791.2
844.635	411.255			0.0492097	0.0464013		3224.96	3040.91
1044.82	662.259			0.0927413	0.0452703		6077.8	2966.79
755.247	451.882			0.060203	0.0423587		3945.41	2775.98
474.851	716.549			0.0579935	0.0488412		3800.61	3200.81
1336.94	3843.41			0.148896	0.288674		9757.9	18918.3
580.016	301.859			0.0419875	0.0389144		2751.65	2550.25
1469.56	1886.96			0.145616	0.168479		9542.97	11041.3
484.624	372.847			0.0561297	0.0431037		3678.46	2824.8
2162.36	242.329			0.10122	0.0421442		6633.46	2761.92
1006.45	379.78			0.0803172	0.0442841		5263.59	2902.16
277.973	3829.51			0.050948	0.311241		3338.88	20397.2
536.553	1208.95			0.0522396	0.100503		3423.52	6586.46
2375.21	827.447			0.243437	0.0872282		15953.6	5716.5
1648.52	1640.43			0.0739047	0.124937		4843.34	8187.77
337.369	417.208			0.0432857	0.0474963		2836.73	3112.67
601.957	981.769			0.062515	0.0486313		4096.92	3187.05
895.086	1828.66			0.0670879	0.145443		4396.6	9531.63
738.675	392.482			0.0577902	0.0457225		3787.28	2996.43
467.996	900.631			0.0420595	0.0572047		2756.37	3748.91
385.392	3686.05			0.0453029	0.306329		2968.93	20075.3
1528.91	1336.03			0.102957	0.0868681		6747.3	5692.9
821.416	1311.99			0.0563154	0.147514		3690.63	9667.35
620.439	1449.03			0.0710291	0.178079		4654.89	11670.4
1018.45	443.133			0.0694759	0.0495176		4553.1	3245.14
747.055	683.667			0.100289	0.0599497		6572.46	3928.81
1018.38	1037.72			0.0853558	0.0918578		5593.79	6019.9
570.584	376.725			0.0504629	0.0556957		3307.09	3650.02
861.282	1943.59			0.0838884	0.171211		5497.63	11220.3
894.694	1077.45			0.0466278	0.0907174		3055.75	5945.17
663.549	880.878			0.0576097	0.0890766		3775.45	5837.63
705.898	290.176			0.0664312	0.0466672		4353.57	3058.33
395.024	612.039			0.0672037	0.0529858		4404.2	3472.43
1200.05	448.71			0.0973041	0.0661229		6376.82	4333.36
849.749	348.878			0.0709543	0.0519242		4649.99	3402.85
447.549	406.059			0.0411237	0.0459447		2695.04	3010.98
1080.96	400.302			0.0732753	0.045463		4802.1	2979.42
391.843	903.961			0.0466535	0.0779814		3057.44	5110.51
520.341	1918.56			0.0484534	0.15511		3175.39	10165.2
858.577	680.039			0.0679953	0.0589749		4456.07	3864.92
378.145	667.863			0.0432215	0.0562032		2832.52	3683.28
1792.98	629.8			0.150556	0.0573536		9866.72	3758.67
661.035	789.835			0.0621157	0.0816367		4070.75	5350.06
842.549	1075.8			0.0634068	0.0826328		4155.36	5415.34
359.557	2137.68			0.0382304	0.174178		2505.43	11414.7
282.596	1847.04			0.0364876	0.0746942		2391.21	4895.09
367.11	1334.05			0.0604495	0.123307		3961.56	8080.9
1246.54	3153.35			0.0994445	0.292926		6517.1	19196.9
904.98	1533.89			0.0940239	0.111095		6161.86	7280.64
694.788	428.075			0.0760995	0.053785		4987.18	3524.8
543.667	676.718			0.0520255	0.0743482		3409.49	4872.41
623.675	1720.51			0.0880399	0.115378		5769.69	7561.28
1014.58	461.941			0.0804517	0.0571639		5272.4	3746.23
2086.87	581.816			0.165074	0.0520734		10818.1	3412.63
391.655	3155.97			0.046961	0.272842		3077.59	17880.7
1771.65	1281.51			0.172072	0.0894219		11276.7	5860.27
2522.42	533.02			0.188409	0.0620584		12347.4	4067
748.608	4112.91			0.0915057	0.344291		5996.82	22563.1
738.741	2798.19			0.050159	0.338641		3287.17	22192.9
387.235	745.373			0.0550363	0.0758495		3606.8	4970.79
318.243	702.867			0.054169	0.0572833		3549.97	3754.06
802.855	1693.25			0.0759057	0.155244		4974.48	10173.9
891.318	1083.07			0.067473	0.168572		4421.84	11047.4
2071.88	299.153			0.134608	0.0429078		8821.52	2811.96
1270.52	668.82			0.0436006	0.0624948		2857.37	4095.6
1462.27	713.043			0.14652	0.0556456		9602.2	3646.74
1015.55	843.835			0.0889743	0.0699466		5830.93	4583.95
1130.51	390.278			0.100401	0.0433354		6579.75	2839.98
749.51	593.737			0.0547207	0.0456089		3586.12	2988.98
390.533	1930.85			0.0460861	0.158046		3020.25	10357.6
730.102	681.067			0.058922	0.0482786		3861.45	3163.94
422.047	1889.29			0.0487127	0.153651		3192.39	10069.5
810.467	955.612			0.0621381	0.108444		4072.22	7106.9
1669.79	427.816			0.136521	0.0444438		8946.92	2912.62
1129.35	1451.19			0.0651112	0.101546		4267.06	6654.81
493.769	3879.56			0.0471874	0.358157		3092.42	23471.8
654.8	777.106			0.0572578	0.0656062		3752.39	4299.5
1318.11	1340.28			0.114103	0.103234		7477.72	6765.42
1023.29	483.608			0.0883667	0.0485063		5791.11	3178.86
988.8	4523.58			0.0760908	0.372403		4986.61	24405.4
933.173	396.322			0.0885699	0.0496644		5804.43	3254.75
516.329	803.329			0.0420258	0.0722289		2754.16	4733.52
1138.03	803.957			0.0888601	0.0672993		5823.45	4410.46
831.89	759.204			0.0580119	0.0549352		3801.81	3600.18
996.439	422.329			0.0872844	0.0492627		5720.19	3228.43
412.361	539.447			0.0435393	0.0590334		2853.35	3868.75
876.408	1186.79			0.0678544	0.0817291		4446.84	5356.12
575.153	425.898			0.050131	0.047709		3285.34	3126.61
1266.43	498.059			0.0600318	0.0530584		3934.19	3477.18
1344.44	1024.03			0.102715	0.0701247		6731.46	4595.62
782.424	1349.37			0.0858862	0.108987		5628.55	7142.49
1368.65	4387.57			0.0842921	0.249719		5524.08	16365.4
1270.46	1498.8			0.136697	0.0964792		8958.42	6322.76
973.616	606.071			0.0866052	0.049459		5675.67	3241.3
843.396	1079.3			0.0717235	0.111937		4700.4	7335.8
1609.29	442.275			0.13803	0.0426289		9045.81	2793.68
759.788	569.592			0.0558914	0.055397		3662.85	3630.44
1216.71	1615.53			0.13228	0.122314		8668.96	8015.88
400.337	704.22			0.0461431	0.0569757		3023.99	3733.9
767.075	413.941			0.0700397	0.0497346		4590.05	3259.36
222.584	627.196			0.0391667	0.0464349		2566.79	3043.11
818.482	1805.25			0.0905	0.165195		5930.92	10826
511.871	728.38			0.0479235	0.0519492		3140.66	3404.49
623.435	4003.78			0.0521878	0.251494		3420.13	16481.6
885.024	1043.04			0.0828441	0.0964174		5429.19	6318.71
1294.47	400.871			0.0749985	0.0428784		4915.03	2810.04
853.024	858.329			0.108458	0.0559027		7107.81	3663.58
1910.32	1710.84			0.131992	0.0860495		8650.08	5639.25
846.859	1071.97			0.0719506	0.0668854		4715.28	4383.34
6015.42	1891			0.60311	0.150593		39524.8	9869.13
671.706	514.671			0.0584499	0.049717		3830.51	3258.2
388.514	685.839			0.0480774	0.0526839		3150.75	3452.64
560.071	1181.71			0.0433491	0.0883786		2840.88	5791.89
509.263	788.933			0.0441264	0.0511862		2891.82	3354.49
1246.43	781.216			0.109644	0.0661039		7185.51	4332.12
849.498	962.914			0.0703693	0.0736905		4611.65	4829.31
738.702	930.945			0.0634624	0.101921		4159.01	6679.38
685.933	1142.12			0.0746066	0.0888808		4889.35	5824.8
1929.7	598.247			0.15763	0.0707566		10330.3	4637.03
1842.05	992.749			0.128054	0.0765833		8391.99	5018.89
612.259	1089.82			0.0602736	0.0945125		3950.03	6193.88
1785.03	527.326			0.143722	0.0564951		9418.84	3702.41
849.494	5954.2			0.0518902	0.284781		3400.62	18663.1
497.639	440.651			0.049749	0.0671315		3260.3	4399.46
1682.07	544.753			0.110859	0.0566979		7265.17	3715.69
799.02	2116.81			0.0761551	0.15091		4990.83	9889.87
1009.03	545.686			0.0685201	0.0783919		4490.47	5137.42
1474.91	535.494			0.112254	0.0523762		7356.59	3432.47
604.482	647.263			0.0512186	0.0700577		3356.61	4591.23
562.349	1066.33			0.0437864	0.0861057		2869.54	5642.94
913.89	963.208			0.0701482	0.0739337		4597.16	4845.24
1973.17	467.706			0.12708	0.0569055		8328.19	3729.3
537.612	622.275			0.0469694	0.0726956		3078.14	4764.11
580.753	1287.32			0.0530078	0.0838862		3473.86	5497.48
662.463	982.318			0.0527355	0.0881398		3456.02	5776.24
1282.8	439.863			0.104958	0.0548457		6878.44	3594.31
902.859	757.659			0.0759215	0.086788		4975.52	5687.65
662.38	2055.69			0.0532674	0.151835		3490.88	9950.49
826.843	1412.03			0.0537994	0.126606		3525.74	8297.09
1013.15	508.984			0.162521	0.0549303		10650.8	3599.86
600.173	483.259			0.0480946	0.0525453		3151.88	3443.55
400.075	535.455			0.0499781	0.0573661		3275.31	3759.49
881.753	2772.38			0.0690704	0.210411		4526.53	13789.3
926.62	436.388			0.0656014	0.0501192		4299.19	3284.56
971.126	1114.69			0.106448	0.0944976		6976.07	6192.9
1386.35	2365.33			0.109715	0.226369		7190.14	14835.1
822.961	712.631			0.0666311	0.0610339		4366.67	3999.85
1672.53	959.51			0.128488	0.0819044		8420.45	5367.6
714.337	899.212			0.0426266	0.0914205		2793.54	5991.24
668.361	498.871			0.0679297	0.0664275		4451.78	4353.33
1092.5	529.326			0.0810522	0.0594948		5311.75	3898.99
581.047	589.616			0.0400612	0.0496518		2625.41	3253.93
621.8	548.722			0.0691965	0.0559406		4534.79	3666.07
1428.13	1880.25			0.103465	0.142174		6780.57	9317.39
956.89	866.098			0.0629161	0.0741459		4123.2	4859.15
460.745	944.6			0.0504097	0.0845961		3303.6	5544.01
1618.39	1150.4			0.0981617	0.106826		6433.03	7000.81
736.608	518.518			0.0644564	0.0585036		4224.15	3834.04
802.976	430.243			0.0587143	0.046847		3847.84	3070.12
810.067	1965.16			0.0632321	0.10011		4143.92	6560.71
393.898	1386.93			0.0460646	0.0659377		3018.84	4321.23
855.227	446.392			0.0699687	0.0592504		4585.4	3882.97
1113.87	825.678			0.0875065	0.0761555		5734.74	4990.85
1567.46	2819.72			0.117713	0.233498		7714.3	15302.3
2110.85	711.655			0.150592	0.0599996		9869.04	3932.07
675.851	1727.32			0.0642261	0.154833		4209.06	10147
1179.45	578.204			0.0985504	0.0606465		6458.5	3974.47
701.565	522.726			0.0846074	0.0564925		5544.75	3702.24
441.035	1329.18			0.048248	0.114014		3161.94	7471.91
427.278	594.059			0.0464534	0.0799326		3044.32	5238.38
439.153	596.235			0.0700851	0.0685643		4593.02	4493.36
468.486	1436.93			0.0695806	0.165946		4559.97	10875.3
877.875	1713.11			0.0603392	0.113181		3954.33	7417.34
745.576	943.526			0.061425	0.0787847		4025.49	5163.16
1772.8	552.259			0.14661	0.0571342		9608.06	3744.29
2680.85	757.196			0.221229	0.0595467		14498.2	3902.39
690.259	921.118			0.0531459	0.0803838		3482.92	5267.95
1185.58	1441.28			0.059981	0.120862		3930.85	7920.69
797.165	645.012			0.0734782	0.0532408		4815.39	3489.13
550.326	489.875			0.056047	0.0523538		3673.04	3431.01
751.177	923.267			0.0675154	0.106625		4424.62	6987.68
502.231	480.302			0.0534402	0.0503514		3502.21	3299.78
751.863	434.6			0.0844505	0.0568402		5534.46	3725.02
671.176	986.361			0.0539444	0.105697		3535.25	6926.83
1571.11	766.69			0.129469	0.108458		8484.75	7107.8
1517.77	1649.07			0.114566	0.133205		7508.09	8729.57
739.047	448.792			0.0466835	0.0452868		3059.41	2967.87
729.686	1018.53			0.061681	0.0724265		4042.26	4746.47
226.522	1300.02			0.0419484	0.109762		2749.09	7193.27
674.365	1072.73			0.0479259	0.0848145		3140.82	5558.32
583.055	846.631			0.0634652	0.0719986		4159.19	4718.43
444.616	1235.03			0.0508016	0.105055		3329.28	6884.81
615.698	1000.7			0.0721719	0.0930969		4729.78	6101.1
374.157	407.255			0.0463754	0.0632482		3039.21	4144.97
717.188	1030.98			0.0580156	0.0939304		3802.05	6155.73
805.749	485.027			0.0542775	0.0578861		3557.07	3793.56
1493.11	5768.58			0.139139	0.446899		9118.51	29287.5
603.165	511.369			0.0604919	0.0546509		3964.34	3581.55
824.612	4395.29			0.058479	0.162008		3832.42	10617.2
1074.19	442.996			0.0856203	0.0484466		5611.13	3174.95
420.239	1676.72			0.0453577	0.134009		2972.52	8782.26
756.22	397.094			0.0779929	0.0500371		5111.27	3279.18
802.577	905.11			0.0675911	0.0552166		4429.58	3618.62
658.463	836.337			0.0512941	0.0702391		3361.56	4603.12
754.478	1968.4			0.0655157	0.191609		4293.57	12557.1
986.992	532.424			0.0917194	0.0448697		6010.83	2940.53
1283.4	788.98			0.118199	0.0718169		7746.17	4706.52
1968.81	1818.62			0.122989	0.145536		8060.1	9537.71
797.055	596.318			0.0560951	0.0464856		3676.19	3046.44
767	718.227			0.0604032	0.073476		3958.52	4815.25
2480.99	351.137			0.201559	0.0471895		13209.2	3092.57
935.451	322.408			0.0641291	0.0423385		4202.7	2774.66
1793.27	1557.06			0.153206	0.13281		10040.3	8703.67
546.6	353.137			0.0402385	0.0549801		2637.03	3603.12
583.31	939.063			0.0440833	0.0913396		2889	5985.94
705.376	956.2			0.0575771	0.104389		3773.31	6841.11
690.471	782.271			0.0674947	0.0718536		4423.26	4708.93
746.635	1018.46			0.0620335	0.0550223		4065.37	3605.89
1092.57	559.631			0.096101	0.0515837		6297.98	3380.54
817.996	1291.72			0.055371	0.108357		3628.74	7101.16
1724.93	1028.61			0.104833	0.0791663		6870.24	5188.16
776.294	893.882			0.05776	0.0761399		3785.3	4989.83
2104.03	449.463			0.169461	0.0490573		11105.6	3214.97
623.188	1060.04			0.0435491	0.0983065		2853.99	6442.52
1212.65	578.114			0.118227	0.0727828		7747.99	4769.82
3386.84	556.663			0.202429	0.0597791		13266.2	3917.62
1153.38	513.498			0.0815167	0.0639714		5342.2	4192.36
909.086	508.255			0.0865137	0.0564164		5669.68	3697.25
1748.2	1496.91			0.116601	0.156466		7641.43	10254
2225.72	414.118			0.186159	0.0553781		12199.9	3629.21
441.984	653.71			0.0516035	0.0816729		3381.84	5352.43
508.957	857.882			0.0520034	0.060017		3408.04	3933.21
448.302	471.259			0.0438094	0.0560755		2871.05	3674.91
839.635	971.082			0.0578381	0.0792138		3790.42	5191.28
745.11	481.039			0.052091	0.0579147		3413.78	3795.44
1169.82	1117.72			0.0513934	0.0961726		3368.06	6302.67
600.604	611.816			0.0749537	0.0597301		4912.09	3914.41
415.635	692.063			0.0500343	0.0628348		3279	4117.88
629.059	326.11			0.0587411	0.0435626		3849.6	2854.88
798.918	390.784			0.069866	0.0449901		4578.67	2948.43
623.839	4933.78			0.0649562	0.255769		4256.9	16761.8
1192.72	353.486			0.103607	0.0447225		6789.87	2930.89
299.906	906.769			0.0516634	0.0699182		3385.76	4582.09
922.647	655.475			0.0707389	0.0702018		4635.87	4600.68
291.765	1271.18			0.0534465	0.0983049		3502.62	6442.41
1221.35	2145.23			0.0909825	0.194667		5962.54	12757.5
265.482	1835.34			0.0475094	0.123667		3113.53	8104.5
569.169	1351.21			0.0498484	0.0920253		3266.81	6030.88
1241.86	1263.64			0.110407	0.109085		7235.53	7148.88
1118.18	601.671			0.0819423	0.04961		5370.09	3251.19
925.796	954.718			0.0757979	0.0800803		4967.42	5248.06
684.878	1131.71			0.0651149	0.0968436		4267.3	6346.64
978.671	974.114			0.0862721	0.0893928		5653.84	5858.36
367.2	616.224			0.064207	0.0756845		4207.81	4959.99
429.306	916.62			0.0530269	0.0932282		3475.12	6109.71
1789.78	388.165			0.140994	0.044311		9240.04	2903.92
1834.75	809.949			0.139535	0.0960566		9144.42	6295.07
415.718	647.906			0.0519842	0.0836331		3406.78	5480.9
1216.74	569.125			0.0919753	0.0511896		6027.6	3354.71
607.008	761.2			0.0572325	0.0574361		3750.73	3764.07
1453.26	1834.31			0.113874	0.112555		7462.73	7376.3
835.49	803.478			0.0670054	0.0592405		4391.2	3882.32
1032.5	413.835			0.0891856	0.0527112		5844.78	3454.43
550.341	1261.93			0.0463055	0.121421		3034.63	7957.31
864.816	712.416			0.0882285	0.0625694		5782.05	4100.49
776.776	1181.56			0.0577271	0.101135		3783.15	6627.89
642.592	880.506			0.0538952	0.0760236		3532.02	4982.21
465.094	1173.47			0.0575256	0.116278		3769.94	7620.26
923.098	856.969			0.0791476	0.0686674		5186.94	4500.12
1068.25	1591.55			0.0765056	0.197537		5013.79	12945.6
1253.6	1335.71			0.0972314	0.166174		6372.06	10890.2
828.098	778.847			0.0631557	0.100147		4138.91	6563.17
1186.93	1244.07			0.148831	0.12611		9753.63	8264.59
527.035	1222.45			0.049408	0.0455087		3237.95	2982.41
1727.25	1370.82			0.112437	0.104261		7368.53	6832.72
733.926	457.388			0.0540327	0.0597581		3541.03	3916.24
1127.2	995.89			0.0825606	0.109402		5410.61	7169.69
279.918	921.345			0.0385987	0.10514		2529.56	6890.37
985.165	622.286			0.0707682	0.0560921		4637.8	3676
1430.65	469.341			0.11437	0.0682281		7495.22	4471.33
644.267	800.392			0.0515702	0.0535236		3379.65	3507.67
542.992	935.118			0.0426478	0.0836869		2794.93	5484.42
809.812	1000.4			0.0652811	0.0869532		4278.2	5698.48
1375.27	1133.98			0.105807	0.103371		6934.04	6774.45
744.173	1571.45			0.0661075	0.102414		4332.36	6711.73
407.533	827.326			0.0424337	0.0861708		2780.89	5647.2
888.506	961.741			0.067913	0.0786186		4450.68	5152.27
1164.59	691.082			0.0969766	0.0906575		6355.36	5941.24
420.871	1214.29			0.0564472	0.106042		3699.27	6949.46
398.133	418.514			0.0571784	0.0449821		3747.19	2947.9
2018.37	898.996			0.137989	0.0492061		9043.13	3224.72
452.996	336.302			0.0388338	0.0505717		2544.97	3314.22
686.09	1601.09			0.0587406	0.104041		3849.57	6818.36
1137.16	709.663			0.0764478	0.085296		5010.01	5589.87
709.435	1598.14			0.0586698	0.214659		3844.93	14067.7
555.271	746.894			0.0516964	0.0674031		3387.92	4417.26
697.2	474.624			0.057907	0.0485747		3794.93	3183.34
2245.81	706.153			0.185161	0.0708704		12134.5	4644.49
615.42	732.875			0.0651445	0.0471545		4269.24	3090.27
827.769	459.29			0.0636892	0.0513805		4173.87	3367.22
780.106	1360.07			0.0550572	0.0965071		3608.18	6324.59
478.643	380.631			0.0574257	0.051618		3763.39	3382.79
902.427	1746.93			0.0999255	0.117299		6548.62	7687.17
858.11	3727.37			0.069275	0.307615		4539.94	20159.5
1180.67	639.396			0.0952003	0.0594842		6238.95	3898.3
840.071	730.996			0.0729988	0.0708948		4783.98	4646.09
482.173	1000.58			0.0613529	0.0801619		4020.76	5253.41
563.063	1253.92			0.0464037	0.103553		3041.07	6786.34
1142.74	249.902			0.0861793	0.0487804		5647.76	3196.82
546.286	1679.31			0.0648642	0.15207		4250.88	9965.89
369.643	1337.01			0.0420192	0.10951		2753.73	7176.76
1376.45	4545.23			0.0972894	0.349822		6375.86	22925.6
395.024	859.486			0.0765846	0.068693		5018.97	4501.79
939.149	1737.84			0.070264	0.13916		4604.75	9119.88
574.969	632.094			0.0728362	0.0624044		4773.32	4089.67
542.345	3719.75			0.0417317	0.2159		2734.89	14149
930.38	671.224			0.0623078	0.0584588		4083.34	3831.1
384.933	821.455			0.0387608	0.0669101		2540.19	4384.95
387.227	2623.49			0.0477587	0.239108		3129.87	15669.9
580.655	694.675			0.0484849	0.0449569		3177.46	2946.25
504.188	794.941			0.0481004	0.0579108		3152.26	3795.18
681.298	1197.81			0.0666697	0.133105		4369.2	8723.01
1030.22	1130.22			0.0942903	0.107394		6179.31	7038.1
2038.84	1818.79			0.0911704	0.106661		5974.85	6990.05
555.682	1691.69			0.045436	0.152089		2977.65	9967.15
798.384	637.98			0.0693403	0.0617002		4544.22	4043.52
531.345	464.753			0.0499619	0.0542555		3274.25	3555.64
843.631	389.306			0.0678815	0.0541831		4448.61	3550.89
712.933	1174.39			0.0559471	0.107378		3666.49	7036.99
358.726	1011.43			0.0666776	0.087471		4369.72	5732.41
686.004	1698.92			0.0578565	0.143284		3791.62	9390.13
694.659	1063.33			0.0629391	0.0989423		4124.71	6484.19
2038.81	1520.7			0.207576	0.0985546		13603.5	6458.78
484.737	576.533			0.0426668	0.0624968		2796.17	4095.73
796.537	1170.36			0.0731775	0.112061		4795.69	7343.89
928.42	2219.96			0.0836565	0.187481		5482.43	12286.6
2510.93	2491.75			0.213442	0.25315		13987.9	16590.2
594.914	1134.19			0.0465686	0.0950066		3051.87	6226.25
879.506	2725.15			0.0681259	0.212322		4464.63	13914.5
1646.78	866.498			0.133743	0.0734196		8764.86	4811.55
316.294	568.926			0.0469001	0.0713565		3073.6	4676.35
686.518	907.118			0.0574684	0.094344		3766.19	6182.83
1006.66	458.843			0.0455607	0.0548265		2985.82	3593.06
1170.75	1249.53			0.0558006	0.0959111		3656.89	6285.53
987.792	744.11			0.0727173	0.0813324		4765.53	5330.12
478.078	7304.36			0.0583877	0.579297		3826.44	37964.2
535.808	383.624			0.0561114	0.0577312		3677.26	3783.41
710.878	1203.56			0.0654705	0.101267		4290.61	6636.55
1111.66	788.184			0.0918802	0.0744132		6021.37	4876.67
952.075	481.765			0.0692166	0.0521503		4536.11	3417.67
918.235	479.345			0.0803285	0.0525137		5264.33	3441.49
2398.66	370.161			0.204856	0.0629204		13425.2	4123.49
449.812	1354.92			0.0550296	0.130469		3606.36	8550.29
396.902	406.886			0.0619192	0.0582181		4057.87	3815.32
739.992	970.553			0.0791182	0.0857379		5185.01	5618.83
471.926	1036.01			0.0694212	0.0933509		4549.52	6117.75
399.294	831.761			0.041824	0.0719392		2740.94	4714.53
854.816	2275.8			0.0571592	0.167993		3745.93	11009.4
413.851	1358.75			0.043577	0.1023		2855.82	6704.23
538.533	781.667			0.045126	0.131108		2957.33	8592.17
563.494	917.016			0.0395407	0.0869292		2591.3	5696.9
2229.53	1012.33			0.0717838	0.0865908		4704.35	5674.73
876.651	1612.67			0.0852856	0.168566		5589.19	11047
647.42	1125.66			0.0500789	0.116287		3281.92	7620.9
802.392	2590.43			0.107358	0.149511		7035.69	9798.22
1610.01	711.961			0.121896	0.0568432		7988.48	3725.22
544.373	1539.8			0.0466632	0.115194		3058.07	7549.27
698.51	718.729			0.0521743	0.0847159		3419.24	5551.85
571.447	907.816			0.0462074	0.0706856		3028.2	4632.38
566.275	466.502			0.0495688	0.0508394		3248.49	3331.76
2231.11	863.486			0.157342	0.0662742		10311.4	4343.28
480.145	1908.38			0.0432875	0.135471		2836.85	8878.08
703.424	1299.11			0.0708026	0.106362		4640.05	6970.44
801.282	541.094			0.0479236	0.0640197		3140.67	4195.53
387.604	737.953			0.0521464	0.0556022		3417.41	3643.89
1476.39	438.733			0.127374	0.0490205		8347.43	3212.56
2424.07	1095.12			0.16986	0.0965797		11131.8	6329.35
1362.09	754.075			0.102452	0.0785412		6714.17	5147.2
340.753	620.933			0.0520472	0.0500793		3410.91	3281.95
374.247	1488.85			0.0470692	0.11443		3084.68	7499.16
337.671	586.078			0.0466138	0.0463083		3054.84	3034.82
941.031	786.612			0.0862857	0.0552784		5654.73	3622.67
525.867	470.49			0.0487591	0.0463583		3195.43	3038.09
418.529	658.314			0.0474577	0.0698402		3110.14	4576.98
1039.36	561.988			0.0498688	0.0560363		3268.15	3672.34
965.243	1293.78			0.0898402	0.0641404		5887.68	4203.44
445.396	441.431			0.0477842	0.051377		3131.53	3366.99
674.788	1011.64			0.0454587	0.0732279		2979.13	4798.99
790.953	556.969			0.061798	0.051686		4049.93	3387.24
495.345	1914.42			0.0437855	0.0991773		2869.48	6499.59
358.918	840.482			0.0372283	0.064262		2439.75	4211.41
1327.15	812.675			0.0880715	0.0698594		5771.76	4578.24
614.702	1179.72			0.0698525	0.103114		4577.78	6757.54
815.059	618.396			0.0778396	0.0713589		5101.22	4676.5
685.188	2077.13			0.0547931	0.162874		3590.87	10673.9
591.706	617.992			0.0720538	0.0591267		4722.05	3874.87
465.341	800.839			0.0388399	0.0834468		2545.37	5468.69
603.326	2182.75			0.0772603	0.11227		5063.25	7357.61
235.996	1618.01			0.0354189	0.164015		2321.18	10748.7
290.286	803.459			0.056752	0.0782793		3719.24	5130.03
392.341	452.925			0.0467685	0.056306		3064.98	3690.01
1985.77	770.855			0.137044	0.0652438		8981.18	4275.75
1301.78	508.475			0.118906	0.0668606		7792.51	4381.71
1033.4	490.576			0.0945381	0.0632023		6195.56	4141.96
455.871	799.176			0.0572199	0.0953103		3749.9	6246.16
472.082	3161.22			0.042381	0.177437		2777.44	11628.3
1060.92	1981.77			0.0779513	0.153996		5108.54	10092.1
449.216	531.643			0.0526569	0.0608914		3450.87	3990.52
663.267	664.588			0.059598	0.0611903		3905.76	4010.11
1979.03	642.165			0.146704	0.0626014		9614.22	4102.58
836.133	1683.57			0.064234	0.0848359		4209.57	5559.72
1195.94	309.549			0.111002	0.0545461		7274.53	3574.68
927.977	1048.51			0.0742738	0.0992997		4867.53	6507.61
2231.05	430.51			0.176577	0.0580046		11572	3801.33
535.906	426.714			0.0605201	0.0576329		3966.19	3776.97
1661.91	690.824			0.13685	0.0632044		8968.46	4142.1
481.349	1494.54			0.0563641	0.134522		3693.82	8815.91
684.388	766.702			0.062076	0.0637431		4068.15	4177.4
378.98	1574.97			0.0461777	0.134901		3026.26	8840.73
913.282	571.431			0.0769015	0.0468578		5039.74	3070.83
1037.78	932.878			0.077055	0.0728186		5049.8	4772.16
601.435	971.663			0.0653308	0.0803027		4281.45	5262.64
606.863	648.584			0.0663601	0.0626107		4348.91	4103.19
1296.15	986.039			0.101507	0.0879371		6652.29	5762.96
464.678	2656.93			0.0634633	0.202479		4159.07	13269.5
3037.95	813.49			0.354693	0.0727565		23244.8	4768.1
1320.68	693.357			0.109709	0.0544193		7189.81	3566.37
621.812	1102.48			0.0590739	0.0841201		3871.41	5512.81
638.38	513.776			0.067532	0.0475411		4425.71	3115.6
426.2	741.486			0.0433747	0.122277		2842.56	8013.41
1581	1727.01			0.140496	0.13298		9207.37	8714.85
560.075	579.761			0.0500156	0.0629559		3277.77	4125.81
376.243	4808.62			0.0536341	0.365452		3514.91	23949.9
349.918	699.396			0.0537673	0.0518571		3523.64	3398.45
573.796	868.29			0.0699837	0.055997		4586.38	3669.77
713.526	1343.82			0.0693349	0.126168		4543.86	8268.45
376.624	2498.16			0.0429592	0.19822		2815.33	12990.3
547.471	443.055			0.0433949	0.0478306		2843.89	3134.58
1086.42	835.42			0.0988369	0.0585725		6477.28	3838.55
401.859	701.369			0.0425023	0.0474796		2785.39	3111.58
540.557	489.047			0.0386443	0.0613379		2532.56	4019.78
679.463	443.914			0.0575523	0.0511893		3771.69	3354.69
1862.6	419.639			0.161083	0.0536486		10556.6	3515.86
594.463	660.651			0.0462401	0.0568058		3030.35	3722.77
450.192	477.396			0.0484234	0.0423712		3173.43	2776.8
826.553	646.42			0.0816429	0.0695898		5350.47	4560.57
2688.01	872.502			0.318674	0.14549		20884.3	9534.67
768.675	588.451			0.0597122	0.0520385		3913.24	3410.34
451.165	567.878			0.0440075	0.0457266		2884.03	2996.69
5879.82	705.8			0.41689	0.105092		27320.9	6887.23
505.502	537.816			0.0441178	0.0508092		2891.26	3329.78
489.553	959.278			0.0550492	0.0532105		3607.65	3487.15
506.62	804.231			0.0476774	0.0597275		3124.54	3914.24
564.278	488.867			0.0477878	0.0478765		3131.77	3137.58
736.545	4597.54			0.0524157	0.400273		3435.06	26231.9
400.98	1408.17			0.0427712	0.12716		2803.01	8333.42
1507.27	1168.82			0.143769	0.0753934		9421.88	4940.91
383.027	578.443			0.0501805	0.0526384		3288.58	3449.66
1915.72	501.471			0.167297	0.045072		10963.8	2953.79
1081.36	3253.44			0.0841922	0.241139		5517.54	15803
759.722	668.6			0.0693177	0.0729435		4542.73	4780.35
452.855	2337.86			0.075501	0.108425		4947.96	7105.64
875.141	1035.38			0.070349	0.0852442		4610.32	5586.48
524.541	1435.95			0.054004	0.0986435		3539.15	6464.6
388.604	830.004			0.0428592	0.0802091		2808.77	5256.5
615.365	949.18			0.0795662	0.0800861		5214.37	5248.44
313.737	2171.48			0.0385001	0.138939		2523.1	9105.39
1388.64	668.914			0.0902182	0.125007		5912.45	8192.35
1558.97	1277.07			0.125501	0.103591		8224.7	6788.86
1168.03	798.533			0.0847444	0.0640415		5553.72	4196.96
528.294	1145			0.0410198	0.10724		2688.23	7027.96
1371.42	1461.16			0.11513	0.11775		7545.02	7716.73
795.212	409.749			0.0623793	0.0490248		4088.03	3212.84
838.753	1235.34			0.0610624	0.129301		4001.72	8473.71
1141.09	1441.2			0.0881965	0.144946		5779.96	9499.02
1700.89	894.337			0.161313	0.140266		10571.7	9192.35
1843.2	668.878			0.145799	0.0851099		9554.96	5577.68
583.918	1882.01			0.0683025	0.144282		4476.2	9455.51
324.663	696.447			0.0575541	0.0697144		3771.81	4568.73
1073.83	495.824			0.0826021	0.0630899		5413.33	4134.6
369.333	1477.77			0.0366912	0.0796684		2404.56	5221.07
807.027	832.067			0.0732396	0.0659637		4799.76	4322.93
244.533	1436.95			0.0343253	0.102955		2249.51	6747.17
648.224	1063.44			0.0562841	0.0701526		3688.58	4597.45
259.145	1549.23			0.0354169	0.136532		2321.04	8947.62
395.075	706.537			0.0465451	0.0730196		3050.33	4785.34
356.404	1046.54			0.040565	0.101134		2658.43	6627.83
718.608	1266.52			0.0697001	0.1463		4567.8	9587.79
880.071	752.486			0.0877176	0.097095		5748.57	6363.12
845.459	545.145			0.0846475	0.0643163		5547.37	4214.97
611.824	675.922			0.0603614	0.103733		3955.79	6798.12
1000.54	995.945			0.0776513	0.130155		5088.88	8529.7
1386.05	1283.83			0.110715	0.118807		7255.74	7786.03
1349.78	1287.61			0.122318	0.113576		8016.09	7443.21
1489.33	899.788			0.124235	0.0675111		8141.76	4424.34
1551.47	652.09			0.122772	0.0538606		8045.87	3529.75
986.365	5281.36			0.0955965	0.428578		6264.92	28086.8
529.71	1663.89			0.0521111	0.159208		3415.1	10433.7
1895.81	985.153			0.170456	0.077437		11170.8	5074.83
951.926	1958.93			0.073787	0.231142		4835.63	15147.9
466.659	1942.05			0.0474778	0.10146		3111.45	6649.2
496.38	884.478			0.0529925	0.0599443		3472.86	3928.45
910.518	2817.18			0.0733638	0.302825		4807.89	19845.6
671.475	884.639			0.0649772	0.0981188		4258.28	6430.22
503.247	511.376			0.0484031	0.0594278		3172.1	3894.6
1017.93	2889.07			0.122864	0.22081		8051.87	14470.8
552.259	3160.44			0.0632961	0.276335		4148.11	18109.6
543.212	1320.22			0.0474172	0.10205		3107.49	6687.84
781.122	1190.75			0.0783393	0.106947		5133.97	7008.76
647.427	1682.42			0.0579717	0.134464		3799.17	8812.11
1164.75	4286			0.0992715	0.361231		6505.76	23673.2
606.871	2167.49			0.0530064	0.203712		3473.78	13350.3
2038.6	698.8			0.152887	0.0915858		10019.5	6002.08
597.588	721.984			0.0479952	0.0751832		3145.37	4927.13
364.98	1184.51			0.0425286	0.0862026		2787.11	5649.29
1876.44	1441.72			0.144319	0.0757286		9457.94	4962.88
563.392	1363.51			0.0511849	0.111053		3354.4	7277.86
1155.49	438.459			0.0908622	0.0652663		5954.65	4277.23
925.365	1096.93			0.0700185	0.0987243		4588.66	6469.9
1606.31	1311.25			0.148306	0.138245		9719.26	9059.89
1801.63	811.655			0.154487	0.0841442		10124.3	5514.39
943.824	1391.01			0.0928412	0.141478		6084.35	9271.76
418.773	1591.63			0.0498895	0.125831		3269.51	8246.31
364.243	871.02			0.0430446	0.0860266		2820.93	5637.76
531.29	609.51			0.0823961	0.0744485		5399.83	4878.98
154.318	536.145			0.0304134	0.0661744		1993.14	4336.74
1057.95	557.851			0.0787636	0.0812602		5161.77	5325.38
389.141	584.349			0.0378248	0.0719376		2478.85	4714.43
811.616	607.502			0.0706183	0.0670014		4627.97	4390.94
528.843	435.129			0.0358586	0.069134		2350	4530.7
655.451	667.667			0.0546574	0.0952993		3581.97	6245.44
414.675	764.22			0.0470473	0.10416		3083.24	6826.11
370.345	498.157			0.0410446	0.0623866		2689.86	4088.5
1559.08	1140.81			0.0745117	0.0633749		4883.12	4153.27
863.169	869.153			0.0830529	0.0612597		5442.87	4014.66
623.118	766.353			0.0593785	0.106586		3891.37	6985.11
981.702	408.482			0.0743545	0.0519103		4872.82	3401.94
1350.99	949.227			0.103883	0.089398		6807.94	5858.69
1307.35	1184.88			0.114962	0.104229		7534.06	6830.67
1457.38	411.173			0.116805	0.0592895		7654.82	3885.54
1510.3	420.627			0.115009	0.044492		7537.11	2915.78
979.651	442.506			0.0910118	0.0546844		5964.46	3583.74
550.435	409.686			0.0530284	0.0469124		3475.22	3074.41
1807.07	368.729			0.157988	0.0543448		10353.7	3561.49
955.016	929.933			0.0725035	0.0858506		4751.51	5626.22
504.149	1553.34			0.0487101	0.129305		3192.21	8473.98
507.243	1177.62			0.0533267	0.109343		3494.76	7165.79
930.678	1423.68			0.0714149	0.127456		4680.17	8352.82
679.835	474.639			0.0645066	0.067922		4227.44	4451.27
542.62	500.925			0.0494685	0.0522996		3241.92	3427.45
976.137	584.22			0.116318	0.0586919		7622.87	3846.38
554.996	542.286			0.0629033	0.0579551		4122.37	3798.09
575.157	1072.76			0.0482191	0.0845756		3160.04	5542.66
819.89	885.808			0.0765108	0.0823548		5014.14	5397.12
664.565	928.369			0.0572752	0.0992059		3753.53	6501.46
1187.28	1652.54			0.0944233	0.111741		6188.03	7322.94
620.502	1082.51			0.0535839	0.0913514		3511.62	5986.71
1943.54	400.926			0.143912	0.0658767		9431.3	4317.23
619.616	558.655			0.0493207	0.0594187		3232.23	3894.01
374.396	479.655			0.0430093	0.0582884		2818.62	3819.93
1791.73	1982.33			0.13644	0.1444		8941.61	9463.27
577.365	1584.78			0.051638	0.192001		3384.1	12582.8
1122.32	491.631			0.0866992	0.0517343		5681.83	3390.41
906.18	516.098			0.0674794	0.0607174		4422.26	3979.12
1544.64	520.467			0.138894	0.0506241		9102.39	3317.65
1716.85	571.059			0.144906	0.064636		9496.44	4235.92
920.329	934.655			0.0895523	0.0560076		5868.81	3670.46
425.804	1159.65			0.0500592	0.0637802		3280.63	4179.83
374.537	472.169			0.0433793	0.0595121		2842.87	3900.12
526.282	1789.65			0.0789621	0.138851		5174.78	9099.62
163.349	302.737			0.0310078	0.0529076		2032.1	3467.3
702.102	1165.86			0.0474714	0.0634757		3111.04	4159.88
416.42	1054.12			0.0462021	0.134815		3027.86	8835.13
718.11	943.486			0.0620504	0.0633808		4066.48	4153.66
259.494	2457.21			0.035552	0.249235		2329.9	16333.6
1152.62	3950.35			0.0500009	0.339144		3276.81	22225.8
723.4	3152.93			0.0602683	0.31742		3949.68	20802.1
894.616	1193.38			0.0901376	0.0875808		5907.17	5739.61
1210.44	488.424			0.108394	0.0801351		7103.62	5251.65
1135.35	788.196			0.0866682	0.0708173		5679.8	4641.01
2291.44	1041.73			0.142547	0.0686432		9341.79	4498.53
325.765	1726.16			0.0421975	0.134227		2765.41	8796.59
653.988	803.251			0.0563297	0.0572238		3691.57	3750.16
671.671	707.235			0.046647	0.0702808		3057.01	4605.85
707.278	815.608			0.046164	0.0825932		3025.36	5412.75
380.827	447.024			0.0466243	0.0592477		3055.52	3882.79
4372	543.267			0.340313	0.0599037		22302.4	3925.79
1180.29	582.741			0.0733236	0.0540626		4805.26	3543
514.627	839.259			0.052967	0.0718236		3471.19	4706.96
647.016	1168			0.0630067	0.0909519		4129.14	5960.53
1183.09	1703.62			0.114863	0.0765226		7527.53	5014.91
987.69	761.745			0.0507705	0.126452		3327.25	8287.01
664.808	545.188			0.0551387	0.08416		3613.52	5515.42
1010.04	1786.52			0.0853942	0.158802		5596.31	10407.1
865.243	437.278			0.0702251	0.0715794		4602.2	4690.95
377.455	740.722			0.0575213	0.0741537		3769.66	4859.66
1158.47	1684.6			0.116102	0.149397		7608.78	9790.71
583.51	461.988			0.0681034	0.0621035		4463.16	4069.96
529.855	1463.55			0.0638687	0.146238		4185.64	9583.73
374.227	418.475			0.0439905	0.0580006		2882.92	3801.07
569.776	388.788			0.0607762	0.0608432		3982.97	3987.36
1058.95	725.588			0.0899855	0.0646404		5897.2	4236.21
846.553	1004.84			0.0703	0.079908		4607.11	5236.77
529.62	1358.6			0.0489256	0.114543		3206.34	7506.58
571.086	485.639			0.051477	0.0697157		3373.55	4568.82
1549.73	1187.69			0.124998	0.0835757		8191.75	5477.13
1380.05	648.89			0.0806342	0.0788637		5284.36	5168.33
1046.99	887.777			0.0782795	0.0780806		5130.05	5117.01
663.851	2810.62			0.0463842	0.138195		3039.79	9056.63
441.067	458.196			0.0430771	0.0714146		2823.06	4680.16
639.184	439.161			0.0734273	0.0550948		4812.06	3610.64
1175.13	590.467			0.113627	0.0608039		7446.56	3984.78
1166.39	970.678			0.110182	0.0803475		7220.79	5265.58
575.086	968.506			0.0503843	0.125211		3301.93	8205.69
475.196	1670.13			0.0394616	0.144101		2586.11	9443.63
329.412	1026.47			0.0366217	0.0696713		2400	4565.91
456.675	1179.18			0.0419931	0.085871		2752.02	5627.56
636.271	1848.2			0.0445599	0.145059		2920.23	9506.46
392.8	573.482			0.0452118	0.0654212		2962.95	4287.38
348.926	1214.52			0.0346362	0.192384		2269.89	12607.9
739.051	5457.91			0.0532227	0.422472		3487.95	27686.7
763.808	1336.28			0.0662165	0.12282		4339.5	8049.01
372.886	2159.19			0.0456186	0.185131		2989.61	12132.6
222.184	1048.71			0.0423047	0.121774		2772.44	7980.43
2258.84	4890.59			0.143811	0.441469		9424.67	28931.7
347.89	544.18			0.0461699	0.0698832		3025.74	4579.79
283.502	900.078			0.0448224	0.0911656		2937.44	5974.54
663.42	644.894			0.0609145	0.0718946		3992.03	4711.61
626.6	1064.85			0.0443988	0.0648427		2909.67	4249.47
745.243	1881.03			0.0499627	0.184777		3274.3	12109.3
619.745	780.145			0.0449612	0.130285		2946.53	8538.21
378.51	520.282			0.0475157	0.0673505		3113.94	4413.81
4319.57	1340.45			0.356077	0.111057		23335.5	7278.1
1097.53	574.694			0.0695872	0.057927		4560.4	3796.25
965.016	1090.01			0.0733908	0.150512		4809.67	9863.8
748.188	950.98			0.0714397	0.0765931		4681.8	5019.53
1140.1	1124.23			0.112082	0.100012		7345.29	6554.27
1080.37	1206.44			0.0556778	0.128263		3648.85	8405.73
748.788	568.541			0.0630399	0.0629196		4131.32	4123.43
869.945	1922.42			0.0733326	0.167955		4805.85	11006.9
908.086	537.384			0.0794059	0.0666151		5203.87	4365.62
1129.94	1462.31			0.124649	0.124834		8168.86	8181.02
1093.35	6413.36			0.112207	0.542631		7353.49	35561.3
608.208	1499.58			0.0726218	0.124892		4759.27	8184.79
598.337	608.933			0.0641786	0.0778289		4205.95	5100.52
1159.81	662.49			0.0987999	0.0686518		6474.85	4499.1
807.545	923.867			0.0679923	0.0685514		4455.88	4492.51
500.647	1555.28			0.0570018	0.156404		3735.61	10249.9
526.816	939.984			0.0491524	0.0862925		3221.2	5655.18
521.208	752.918			0.0480022	0.0755411		3145.82	4950.58
1263.84	919.58			0.134109	0.130827		8788.83	8573.72
721.502	607.427			0.0502719	0.0757769		3294.57	4966.04
1550.98	925.894			0.127005	0.0693606		8323.27	4545.54
948.286	1631.47			0.0793014	0.135268		5197.02	8864.78
698.678	618.973			0.0489134	0.0737662		3205.54	4834.27
493.102	580.326			0.0483339	0.0689059		3167.56	4515.75
612.259	1457.85			0.0717183	0.102226		4700.06	6699.39
1226.86	1595.58			0.120245	0.136281		7880.28	8931.17
1100.93	1344.17			0.105981	0.0954668		6945.46	6256.42
703.788	2060.63			0.0632051	0.222626		4142.14	14589.8
282.627	453.408			0.0500226	0.0525812		3278.23	3445.91
433.522	787.941			0.0369332	0.0745169		2420.42	4883.46
280.933	963.412			0.0499881	0.0605462		3275.97	3967.9
1797.6	765.392			0.148501	0.0687746		9731.99	4507.14
850.855	3115.65			0.0623657	0.268614		4087.13	17603.6
653.608	715.192			0.0535744	0.0645073		3511	4227.48
3145.02	1106.85			0.247795	0.0931219		16239.3	6102.74
926.949	458.2			0.102301	0.0611422		6704.29	4006.96
585.122	1430.83			0.0578584	0.115744		3791.75	7585.28
1184.29	1160.89			0.0886375	0.104368		5808.86	6839.79
1114.83	869.89			0.0680813	0.0710811		4461.71	4658.3
633.694	693.843			0.0453546	0.0673503		2972.31	4413.8
1042.25	977.004			0.102453	0.0974276		6714.26	6384.92
1184.44	1217.05			0.0868166	0.102826		5689.53	6738.69
875.757	492.702			0.065886	0.0595626		4317.84	3903.44
652.427	596.914			0.108089	0.0642395		7083.64	4209.94
907.459	1140.05			0.103097	0.105746		6756.45	6930.08
633.773	725.82			0.0514092	0.0612351		3369.1	4013.04
556.294	1098.67			0.0428842	0.103258		2810.42	6767.02
1503.78	1232.91			0.12494	0.0924564		8187.96	6059.13
1415.02	1217.23			0.106145	0.0779727		6956.23	5109.94
476.106	1005.09			0.0495428	0.0843979		3246.78	5531.01
970.024	664.753			0.102768	0.107287		6734.88	7031.08
596.067	1685.04			0.0472881	0.113877		3099.03	7462.93
1995.69	1520.91			0.177237	0.168373		11615.2	11034.3
306.839	4532.4			0.0475572	0.368518		3116.66	24150.8
515.024	1736.18			0.0527418	0.130806		3456.43	8572.35
1350.38	908.094			0.116543	0.0965749		7637.65	6329.04
246.125	467.965			0.0475789	0.0601188		3118.08	3939.89
348.514	494.039			0.0485666	0.0855627		3182.81	5607.35
870.565	591.247			0.10945	0.0805404		7172.8	5278.22
861.906	445.545			0.0672156	0.0819619		4404.98	5371.38
643.796	454.82			0.0503005	0.063478		3296.44	4160.03
908.357	490.039			0.125846	0.0668996		8247.32	4384.26
1141.28	1407.49			0.0923816	0.13871		6054.23	9090.36
650.278	2180.98			0.127008	0.1651		8323.44	10819.9
1437.04	1287.17			0.0905048	0.112279		5931.23	7358.22
544.11	2442.97			0.0446577	0.215258		2926.64	14107
1762.89	1183.69			0.204298	0.115302		13388.7	7556.34
402.176	598.969			0.03995	0.0766239		2618.12	5021.54
544.875	713.835			0.051379	0.0808695		3367.12	5299.78
2017.56	3021.1			0.119758	0.142518		7848.33	9339.93
899.224	682.667			0.0929814	0.0713042		6093.54	4672.92
785.443	564.82			0.0644387	0.0593859		4222.99	3891.86
993.024	528.792			0.0844839	0.057241		5536.65	3751.29
362.059	830.161			0.0373796	0.0565389		2449.67	3705.28
591.608	1079.82			0.0718581	0.0834221		4709.22	5467.07
1405.31	1919.49			0.127189	0.187836		8335.35	12309.8
455.953	583.078			0.0658796	0.063641		4317.42	4170.71
440.851	856.231			0.0639192	0.0785173		4188.95	5145.63
219.439	1112.98			0.0389077	0.0972117		2549.81	6370.77
1205.02	675			0.122774	0.0739888		8045.97	4848.86
710.455	799.071			0.056628	0.0657563		3711.12	4309.34
363.847	1147.64			0.0420535	0.11835		2755.98	7756.09
993.612	2865.91			0.0853692	0.245054		5594.67	16059.6
974.263	518.722			0.0631285	0.0614963		4137.13	4030.16
1034.13	978.553			0.0450876	0.0900481		2954.82	5901.3
1164.75	409.439			0.105369	0.0599209		6905.36	3926.91
1293.46	806.706			0.0605949	0.0579613		3971.09	3798.5
1662.23	454.133			0.144516	0.0553079		9470.88	3624.6
745.765	698.871			0.0678276	0.0779033		4445.08	5105.39
709.094	858			0.0681363	0.0726196		4465.31	4759.12
977.455	521.961			0.0814342	0.0698089		5336.79	4574.92
1714.55	1213.11			0.107698	0.0989241		7057.98	6482.99
693.443	583.282			0.0620531	0.0696956		4066.65	4567.5
1685.05	1141.97			0.108664	0.0984629		7121.3	6452.77
1326.47	1825.49			0.0940629	0.142061		6164.41	9309.98
633.11	681.224			0.0605615	0.0704325		3968.9	4615.8
713.506	1103.07			0.0622443	0.0855488		4079.18	5606.44
703.137	835.149			0.0695693	0.0769865		4559.23	5045.31
436.647	1436.06			0.0569144	0.128094		3729.88	8394.65
797.545	2102.07			0.0659346	0.187417		4321.03	12282.4
1062.45	2402.42			0.110065	0.226216		7213.09	14825.1
1352.22	2401.7			0.0848212	0.186077		5558.76	12194.6
1113.67	474.596			0.136395	0.0660262		8938.66	4327.02
1521.54	728.631			0.109708	0.0744413		7189.7	4878.51
909.827	2555.39			0.0792464	0.218783		5193.41	14338
521.216	700.235			0.053354	0.0599311		3496.56	3927.59
916.443	888.737			0.0836629	0.101593		5482.85	6657.91
770.216	1275.43			0.05802	0.11556		3802.34	7573.2
567.294	546.451			0.0697007	0.0525838		4567.84	3446.08
449.996	1916.4			0.0484075	0.0913052		3172.39	5983.68
313.09	1169.47			0.0423381	0.0985319		2774.63	6457.28
572.478	454.012			0.0621314	0.051522		4071.78	3376.49
1222.58	442.004			0.0849661	0.0525507		5568.25	3443.91
1227.21	2222.56			0.0942339	0.171719		6175.62	11253.6
743.004	725.431			0.0581244	0.0658226		3809.18	4313.69
1532.89	665.086			0.153797	0.0652237		10079.1	4274.44
1212.38	1111.59			0.0977963	0.0910317		6409.08	5965.76
716.537	653.251			0.0652168	0.0599148		4273.98	3926.52
480.863	950.18			0.0553989	0.0695288		3630.57	4556.57
770.553	612.847			0.0603834	0.0600183		3957.23	3933.3
2115.43	1529.21			0.130044	0.12977		8522.46	8504.49
1062.09	677.78			0.0662025	0.0717836		4338.58	4704.34
509.643	767.349			0.0748265	0.100228		4903.75	6568.47
535.69	1338.47			0.0754175	0.0987146		4942.48	6469.26
821.184	505.522			0.0689434	0.06374		4518.2	4177.2
969.424	1843.42			0.0970685	0.124471		6361.39	8157.23
732.639	608.447			0.0520266	0.0687511		3409.57	4505.6
1041.33	741.239			0.0867919	0.0795919		5687.91	5216.05
370.361	643.941			0.0512823	0.0697359		3360.79	4570.14
440.494	543.165			0.0556812	0.0646779		3649.07	4238.66
1177.15	542.02			0.0965909	0.0738849		6330.08	4842.05
1089.59	7293.53			0.0907385	0.708109		5946.55	46405.9
613.898	966.859			0.0592394	0.0930567		3882.26	6098.47
602.216	555.22			0.0564454	0.0828192		3699.15	5427.55
440.651	1407.73			0.0459634	0.138202		3012.21	9057.07
939.651	789.561			0.0735021	0.0660555		4816.96	4328.94
1702.05	1175.87			0.131351	0.0604683		8608.11	3962.79
980.204	579.498			0.0826758	0.0503824		5418.16	3301.81
708.584	863.302			0.0720619	0.0760083		4722.57	4981.2
453.137	1726.44			0.0407901	0.0829419		2673.18	5435.6
1113	807.906			0.1085	0.0823386		7110.57	5396.06
231.733	506.384			0.0391111	0.0588819		2563.15	3858.83
540.063	530.643			0.0392459	0.0757521		2571.98	4964.41
853.051	1070.85			0.06885	0.0899947		4512.08	5897.8
1263.6	454.302			0.104776	0.0742809		6866.5	4868
937.914	1233.49			0.0864676	0.104559		5666.65	6852.3
625.526	460.725			0.0732809	0.054705		4802.46	3585.09
408.926	696.584			0.0424505	0.0599677		2781.99	3929.98
586.082	612.314			0.0664116	0.0639292		4352.28	4189.6
2354.18	1021.62			0.128996	0.108303		8453.75	7097.62
566.024	1136.49			0.0566137	0.0860583		3710.18	5639.83
503.988	582.294			0.0464848	0.0574028		3046.38	3761.89
738.361	638.306			0.0606208	0.0714228		3972.78	4680.7
440.357	917.231			0.0449298	0.0932335		2944.47	6110.06
569.153	2551.52			0.0624825	0.15791		4094.79	10348.7
510.545	1448.68			0.0426841	0.13974		2797.31	9157.85
936.537	1979.16			0.0762901	0.158194		4999.67	10367.2
517.886	1092.96			0.045669	0.0871368		2992.92	5710.51
1152.05	796.651			0.122221	0.0625757		8009.75	4100.9
454.796	447.698			0.0383632	0.0493222		2514.13	3232.33
727.526	985			0.056652	0.0716781		3712.69	4697.42
689.392	516.106			0.0723923	0.0529285		4744.23	3468.67
1930.16	2014.96			0.130707	0.088765		8565.91	5817.21
520.69	573.298			0.0601606	0.0636998		3942.63	4174.57
440.541	513.114			0.0597263	0.0684243		3914.16	4484.19
1493.61	615.251			0.144926	0.0573928		9497.73	3761.24
1934.32	1020.57			0.101662	0.0757155		6662.41	4962.01
364.526	845.686			0.0413904	0.0803808		2712.52	5267.76
1167.65	2177.59			0.0575171	0.161602		3769.38	10590.6
487.024	1109.62			0.0641918	0.11256		4206.81	7376.64
524.294	588.376			0.0560622	0.0526464		3674.04	3450.18
1596.34	1110.73			0.126683	0.156749		8302.2	10272.6
1183.47	2208.54			0.0907083	0.11129		5944.57	7293.36
612.573	515.976			0.0489392	0.0620462		3207.23	4066.2
407.329	1867.17			0.0437471	0.0816929		2866.97	5353.74
229.737	673.788			0.0454835	0.0558558		2980.76	3660.51
247.384	1894.42			0.0420079	0.153543		2752.99	10062.5
530.247	1606.36			0.052396	0.100498		3433.77	6586.12
710.647	594.416			0.0725817	0.0530539		4756.64	3476.89
355.69	2913.5			0.0701559	0.265951		4597.66	17429.1
582.992	2873.26			0.0522769	0.275164		3425.97	18032.9
379.004	953.263			0.0467156	0.0830368		3061.51	5441.82
626.086	1013.62			0.0677803	0.0920472		4441.98	6032.31
1031.05	1167.18			0.0773891	0.0951946		5071.69	6238.58
370.592	1603.04			0.0410492	0.112147		2690.16	7349.58
508.761	447.82			0.0491034	0.0586151		3217.99	3841.34
1568.53	1251.73			0.134846	0.114345		8837.11	7493.57
1049.87	3180.43			0.0932804	0.205573		6113.13	13472.3
573.431	1239.2			0.0478497	0.13818		3135.83	9055.61
504.729				0.0430363			2820.38
1266.82				0.132222			8665.15
658.71				0.127385			8348.2
358.761				0.0470321			3082.25
353.741				0.0433029			2837.85
958.314				0.0869771			5700.04
412.259				0.0476324			3121.59
1055.33				0.0869801			5700.24
386.106				0.0431982			2831
1135.66				0.0875203			5735.64
955.318				0.0853191			5591.39
644.529				0.0624665			4093.74
1533.76				0.145105			9509.44
648.071				0.0566396			3711.88
795.929				0.084872			5562.09
865.302				0.089188			5844.94
1012.69				0.081439			5337.11
1126.56				0.0982523			6438.96
933.09				0.0844349			5533.44
1456.05				0.184007			12058.9
1510.55				0.172025			11273.7
1358.22				0.106012			6947.47
1010.13				0.187373			12279.5
3311.06				0.284602			18651.4
1361.96				0.107031			7014.25
1260.69				0.0609793			3996.28
1500.77				0.181713			11908.6
666.212				0.0497507			3260.41
528.761				0.0447004			2929.44
485.067				0.0471305			3088.69
817.62				0.0688638			4512.99
1503.38				0.140451			9204.44
954.58				0.0869936			5701.12
1507.58				0.124511			8159.81
887.043				0.0785481			5147.65
3235.96				0.255162			16722
512.094				0.0577984			3787.82
1122.65				0.109805			7196.08
394.604				0.0362022			2372.51
957.353				0.0762831			4999.21
793.055				0.0620156			4064.19
1507.09				0.0903967			5924.15
576.098				0.0453192			2970
3607				0.285387			18702.8
701.851				0.0659882			4324.54
794.851				0.0592553			3883.3
541.494				0.0419405			2748.57
938.145				0.084199			5517.98
314.463				0.0334179			2190.04
1507.7				0.134761			8831.54
473.267				0.0410039			2687.19
337.529				0.0384605			2520.51
1420.16				0.108517			7111.68
438.094				0.0426452			2794.75
494.38				0.03749			2456.91
204.643				0.0265391			1739.24
537.278				0.0440537			2887.06
176.557				0.0205681			1347.93
209.125				0.0200908			1316.65
538.886				0.0535034			3506.35
208.631				0.0236088			1547.21
390.251				0.0345875			2266.69
586.796				0.0537015			3519.33
261.957				0.0209969			1376.03
195.643				0.0197141			1291.97
269.486				0.0212545			1392.92
453.29				0.0490255			3212.89
380.235				0.0216104			1416.24
190.071				0.0257653			1688.53
1065.27				0.0739569			4846.76
403.69				0.0334596			2192.78
466.886				0.0439712			2881.65
297.882				0.0317234			2078.99
320.627				0.0243582			1596.32
373.957				0.038966			2553.64
547.318				0.0551787			3616.14
461.035				0.026722			1751.23
192.678				0.0218729			1433.44
727.4				0.104093			6821.72
2460.01				0.243541			15960.5
339.326				0.0200583			1314.52
628.42				0.0669671			4388.69
229.055				0.0213154			1396.9
346.2				0.032115			2104.66
301.643				0.0246159			1613.2
162.525				0.0192954			1264.53
254.698				0.0218381			1431.16
386.071				0.0317597			2081.37
418.098				0.0415522			2723.12
531.792				0.0607415			3980.7
127.616				0.0213083			1396.44
953.78				0.0885754			5804.79
207.843				0.0291956			1913.33
472.431				0.047163			3090.82
486.153				0.0602868			3950.9
361.671				0.0441169			2891.2
373.447				0.0256312			1679.74
319.988				0.0517027			3388.34
552.526				0.0428049			2805.22
388.49				0.0303698			1990.28
253.914				0.0265489			1739.88
258.749				0.0167943			1100.61
535.965				0.0468993			3073.54
658.443				0.0464281			3042.66
368.929				0.0305127			1999.65
222.271				0.0201697			1321.82
293.784				0.024988			1637.59
165.749				0.0196618			1288.54
194.8				0.0160184			1049.77
430.435				0.0279213			1829.82
153.949				0.0201583			1321.07
525.486				0.0398186			2609.51
258.055				0.0284703			1865.8
244.706				0.0260519			1707.31
182.357				0.0191692			1256.26
280.145				0.0200979			1317.12
426.447				0.0317014			2077.55
487.216				0.0462693			3032.26
953.4				0.0690769			4526.96
123.29				0.0179828			1178.5
137.533				0.0208352			1365.44
206.2				0.0156663			1026.69
390.086				0.0237828			1558.61
250.682				0.0249162			1632.89
163.129				0.0157385			1031.42
278.753				0.0230374			1509.76
307.216				0.0196166			1285.57
548.675				0.0474714			3111.04
601.263				0.0423067			2772.57
283.835				0.0233417			1529.7
186.796				0.0174007			1140.35
158.686				0.0186998			1225.49
178.071				0.0213873			1401.62
165.404				0.0195236			1279.48
248.835				0.0199084			1304.7
144.125				0.0189539			1242.14
791.671				0.0506183			3317.27
203.341				0.0194585			1275.21
158.404				0.0175245			1148.47
191.961				0.0206698			1354.6
349.145				0.0243782			1597.63
682.651				0.0449971			2948.88
225.973				0.0199393			1306.72
541.078				0.0506438			3318.94
885.937				0.0620926			4069.24
167.227				0.0203514			1333.73
115.098				0.0201749			1322.16
113.616				0.0207479			1359.72
831.224				0.0384345			2518.81
179.247				0.0221102			1448.99
285.576				0.0207964			1362.89
318.635				0.0297846			1951.93
547.604				0.0456984			2994.84
914.831				0.0578312			3789.97
383.212				0.0314598			2061.72
2313.7				0.185989			12188.8
625.243				0.051342			3364.7
244.592				0.020599			1349.95
303.035				0.0204105			1337.6
1706.32				0.162229			10631.7
175.498				0.0196285			1286.35
172.071				0.0211285			1384.66
461.988				0.0393416			2578.25
492.533				0.0425809			2790.54
235.176				0.026755			1753.39
549.082				0.0505461			3312.54
563.408				0.0552523			3620.96
300.659				0.0263228			1725.06
319.122				0.0317187			2078.68
262.361				0.0279613			1832.44
157.518				0.0182862			1198.39
193.357				0.0281985			1847.99
143.443				0.0172097			1127.84
91.0471				0.0156842			1027.87
194.016				0.0162329			1063.82
202.831				0.0229863			1506.41
444.039				0.0350825			2299.13
579.161				0.0557046			3650.6
496.416				0.0422949			2771.8
227.282				0.0425702			2789.84
476.047				0.0413343			2708.84
427.471				0.0362694			2376.91
451.8				0.0348208			2281.98
599.863				0.0494121			3238.22
519.259				0.038223			2504.94
553.047				0.0377378			2473.15
998.216				0.0558536			3660.37
573.898				0.0523152			3428.48
823.078				0.0596693			3910.43
372.922				0.032154			2107.21
576.914				0.0487711			3196.22
407.541				0.0453075			2969.23
474.737				0.0412134			2700.92
468.141				0.0428152			2805.89
283.2				0.0341988			2241.22
427.263				0.0404873			2653.34
230.937				0.0203147			1331.32
362.741				0.026339			1726.13
505.659				0.0351983			2306.72
504.914				0.0400376			2623.86
674.847				0.048338			3167.83
153.004				0.0191975			1258.11
851.404				0.0783404			5134.04
632.498				0.0639145			4188.64
496.086				0.0437427			2866.68
1583.56				0.0419908			2751.87
183.039				0.0167787			1099.59
441.941				0.0345645			2265.18
188.09				0.0193708			1269.46
262.804				0.0219736			1440.04
749.91				0.0462508			3031.04
448.016				0.0484394			3174.47
187.82				0.0227577			1491.43
547.557				0.0524179			3435.2
401.792				0.0319949			2096.79
266.592				0.0290216			1901.93
287.141				0.0223874			1467.16
243.047				0.0204896			1342.78
146.325				0.0191777			1256.81
397.996				0.0351431			2303.11
146.576				0.0196668			1288.86
169.537				0.0196269			1286.25
271.396				0.0196393			1287.06
259.478				0.0260494			1707.15
246.624				0.0192961			1264.57
173.839				0.0166465			1090.93
295.212				0.0248788			1630.43
136.753				0.0173699			1138.33
240.337				0.0176123			1154.22
103.69				0.0168465			1104.04
157.906				0.018123			1187.69
231.392				0.0180634			1183.78
211.388				0.0270352			1771.75
167.482				0.0255347			1673.42
395.09				0.0360615			2363.29
672.176				0.0575987			3774.73
192.22				0.018936			1240.97
210.906				0.0226683			1485.57
574.686				0.0614835			4029.32
531.129				0.0494212			3238.82
454.392				0.0368526			2415.13
3795.64				0.261859			17160.9
380.851				0.0394746			2586.97
341.835				0.0586338			3842.57
305.416				0.0423541			2775.68
513.686				0.0383835			2515.46
410.639				0.0305535			2002.32
439.529				0.0353888			2319.21
420.4				0.0485675			3182.87
214.569				0.02233			1463.39
315.757				0.0616111			4037.68
122.098				0.0184355			1208.17
267.663				0.0210377			1378.71
616.369				0.0848058			5557.75
267.337				0.0199834			1309.61
390.31				0.037584			2463.07
383.545				0.0298409			1955.62
245.275				0.0263396			1726.17
257.02				0.0295493			1936.51
338.867				0.0378284			2479.08
284.894				0.0202239			1325.37
424.051				0.0348726			2285.38
208.533				0.0198339			1299.81
315.733				0.0277763			1820.32
574.259				0.0425787			2790.39
216.49				0.0197437			1293.91
244.914				0.0222447			1457.8
623.808				0.029972			1964.22
362.341				0.0367374			2407.59
276.18				0.0395844			2594.16
278.612				0.0289708			1898.6
437.592				0.0372514			2441.27
142.302				0.0163961			1074.52
294.682				0.0210217			1377.66
121.2				0.0161363			1057.49
213.584				0.0180912			1185.6
265.467				0.0203392			1332.93
527.318				0.035343			2316.2
1274.76				0.089088			5838.38
324.255				0.0235138			1540.98
522.165				0.0377532			2474.16
287.71				0.0328699			2154.13
438.886				0.0360926			2365.33
169.047				0.0170256			1115.77
298.867				0.0234479			1536.66
269.753				0.0298168			1954.05
243.016				0.0193561			1268.5
380.706				0.0390068			2556.31
430.463				0.0375425			2460.35
913.769				0.0656868			4304.78
559.8				0.0416023			2726.4
307.518				0.025603			1677.89
152.71				0.0182253			1194.4
409.8				0.0419834			2751.38
575.733				0.0454227			2976.78
154.29				0.0185825			1217.8
474.208				0.0320844			2102.65
321.176				0.0338437			2217.95
367.945				0.0228807			1499.49
727.867				0.0564457			3699.17
366.957				0.0271037			1776.24
285.373				0.019593			1284.03
243.471				0.0293232			1921.7
155.251				0.0203741			1335.22
197.165				0.0178786			1171.67
238.588				0.0186106			1219.65
438.298				0.0476515			3122.84
184.526				0.0164329			1076.93
461.961				0.0530441			3476.24
254.098				0.0346466			2270.56
201.557				0.0157123			1029.7
257.22				0.0165596			1085.23
191.569				0.0156217			1023.77
806.459				0.0747067			4895.9
142.231				0.0156625			1026.44
133.667				0.0149632			980.616
313.729				0.023936			1568.65
254.067				0.0203742			1335.23
264.663				0.04653			3049.34
906.855				0.0955892			6264.44
356.29				0.0416276			2728.06
397.22				0.0453706			2973.36
281.486				0.0360972			2365.63
189.545				0.0179971			1179.44
154.655				0.0175644			1151.09
248.012				0.0273955			1795.37
284.118				0.0228648			1498.44
134.616				0.0197152			1292.04
495.863				0.0342802			2246.55
560.757				0.0473732			3104.6
301.702				0.0317114			2078.2
289.749				0.0307068			2012.37
427.655				0.0402347			2636.78
475.816				0.0394181			2583.26
606.698				0.0505161			3310.57
1098.25				0.0508636			3333.35
470.314				0.0371878			2437.1
473.188				0.0362819			2377.73
474.031				0.0275391			1804.78
503.098				0.0414721			2717.87
604				0.0518811			3400.03
673.545				0.0684288			4484.48
446.082				0.0347335			2276.26
524.918				0.0539595			3536.23
716.086				0.0802607			5259.89
346.71				0.0325213			2131.28
1263				0.118636			7774.79
323.329				0.0266554			1746.86
379.078				0.030593			2004.92
612.039				0.039183			2567.86
746.78				0.0557133			3651.17
384.451				0.0357097			2340.24
220.408				0.0216638			1419.74
248.2				0.0302057			1979.53
312.024				0.0394967			2588.41
395.184				0.028284			1853.59
349.878				0.0292418			1916.36
727.565				0.0914256			5991.58
261.306				0.0201594			1321.15
263.761				0.0210235			1377.77
126.855				0.0162094			1062.28

## Sheet: Fig 5E KO EGFP RIF1 Spreads
							RPE1 RIF1KO + EGFP-RIF1
	RPE1	Broken arms		RPE1 RIF1KO	Broken arms		WT	Broken arms		PP1bs	Broken arms
	1	40		1	38		1	37		2	24
	2	23		2	39		3	55		3	5
	6	52		3	43		4	50		4	27
	10	54		4	20		5	45		5	3
	11	18		5	9		11	37		6	14
	14	25		6	45		14	50		7	33
	16	20		7	4		16	48		9	44
	18	38		8	10		17	54		10	25
	23	36		9	8		18	30		12	55
	25	38		10	2		19	27		13	4
	28	17		12	30		20	29		14	38
	37	35		13	31		21	40		17	29
	38	38		20	20		22	42		19	48
	40	39		21	24		23	64		21	17
	43	20		24	16		25	36		22	37
	44	36		25	0		26	55		25	2
	47	28		27	2		28	45		27	8
	48	35		28	13		34	31		30	30
	49	46		31	30		36	60		31	16
	66	66		32	20		39	62		32	2
	68	35		34	23		61	53		33	0
	69	38		37	22		63	32		34	29
	70	54		38	20		66	55		35	34
	72	25		42	32		67	67		36	26
	73	28		44	46		68	45		37	32
	76	55		45	8		70	28		38	37
	79	49		46	26		72	14		40	28
	80	50		47	2		84	23		41	5
	81	25		48	43		85	21		48	26
	85	20		50	2		86	35		49	48
	86	20		51	35		40	33		51	7
				52	35		46	39		52	40
				53	28		47	33		53	32
				54	0		49	28		59	29
				55	9		54	36		61	2
				56	8		55	39		62	47
				57	4		58	41		63	8
				58	38					64	16
				70	45					65	34
										66	42
										68	5
										70	4
