# Supplementary material for: Centromere protection requires strict mitotic inactivation of the Bloom syndrome helicase complex
Source: Research Square preprint supplement (doi:10.21203/rs.3.rs-4420374/v1), 2024-05-30
Supplement: Supplementary file 28 [file Fig 5F. RPE1 PP1i PLK1i .xlsx]

## Sheet: Fig5F RPE1 average per cell
	Average per cell (RPE1 IF BLM)
	BI2536				PP1i 1µM BI2536				PP1i 5µM BI2536
	PICH	BLM	BLM/PICH	Normalised	PICH	BLM	BLM/PICH	Normalised	PICH	BLM	BLM/PICH	Normalised
1	4670.94	990.509	0.212058	0.255325	5458.85	7110.7	1.3026	1.56837	7235.13	1768.18	0.244389	0.294253
2	1772.05	700.093	0.395076	0.475685	3122.4	1221.65	0.391254	0.471083	9511.39	5152.12	0.541678	0.6522
3	3902.85	2359.45	0.604546	0.727894	4045.14	1315.44	0.32519	0.39154	10589.3	2441.87	0.230598	0.277648
4	3119.17	3552.79	1.13902	1.37142	7351.63	3185.81	0.433348	0.521766	11563.4	1842.37	0.159328	0.191837
5	3202.08	5688.44	1.77648	2.13895	3029.13	1617.29	0.533911	0.642847	3235.94	2569.24	0.793971	0.955968
6	2009.34	2273.6	1.13152	1.36238	4634.9	2100.6	0.453214	0.545686	11194.3	1732.46	0.154763	0.18634
7	1264.58	2274.18	1.79836	2.16529	7947.22	2092.17	0.263258	0.316971	5784.15	2391.39	0.413439	0.497795
8	1196.67	1174.49	0.981468	1.18172	7669.28	6891.91	0.898639	1.08199	5140.54	860.828	0.167459	0.201626
9	762.883	952.257	1.24823	1.50292	4188.57	1672.94	0.399405	0.480898	7649.16	2069.91	0.270606	0.325819
10	2156.61	5168.97	2.39681	2.88584	8565.38	1025.92	0.119776	0.144214	3683.48	1901.32	0.516174	0.621492
11	1288.79	3224.48	2.50195	3.01243	4833.34	2492.7	0.51573	0.620957	6851.96	1801.86	0.262971	0.316626
12	7967.49	2908.17	0.365004	0.439478	4381.1	1067.58	0.243679	0.293398	6607.82	1991.46	0.30138	0.362872
13	4151.45	1579.23	0.380405	0.458021	6684.28	2545.52	0.380822	0.458523	6778.76	1789.21	0.263944	0.317797
14	7663.45	5403.22	0.705064	0.848922	7779.65	4730.27	0.608031	0.732091	5377.36	2065.33	0.384079	0.462445
15	8063.68	4073.58	0.505177	0.60825	3659.23	1265.06	0.345718	0.416257	7221.06	2752.28	0.381147	0.458914
16	1700.61	2327.03	1.36835	1.64754	4464.58	1898.07	0.42514	0.511884	5685.93	1607	0.282628	0.340294
17	2400.84	4229.03	1.76148	2.12088	4732.47	2178.3	0.460288	0.554203	8217.72	2980.68	0.362713	0.436719
18	2054.94	3258.37	1.58563	1.90915	4207.23	1623.84	0.385965	0.464715	6490.19	3119.32	0.480621	0.578685
19	4812.39	4590.7	0.953933	1.14857	6299.92	1013.04	0.160801	0.19361	2931.91	781.309	0.266484	0.320856
20	2417.03	2555.68	1.05736	1.2731	9989.86	927.474	0.0928416	0.111785	7186.3	1761.77	0.245156	0.295176
21	6951.53	3348.61	0.481708	0.579994	3820.61	560.175	0.146619	0.176535	2013.87	1554.73	0.772012	0.929529
22	6580.72	1652.11	0.251053	0.302277	5410.83	918.65	0.16978	0.204421	7261.61	2401.53	0.330716	0.398194
23	5707.56	4248.39	0.744345	0.896217	4714.55	638.139	0.135355	0.162972	2324.39	819.276	0.35247	0.424386
24	10084.6	2915.68	0.289122	0.348113	5737.86	1548.27	0.269834	0.32489	2364.59	538.597	0.227776	0.27425
25	9299.97	4801.96	0.516341	0.621692	11393.8	1851.87	0.162534	0.195696	4660.46	1861.64	0.399454	0.480956
26	7056.62	3787.1	0.536673	0.646173	3110.13	2493.68	0.801792	0.965386	4989.46	2899.12	0.581049	0.699603
27	9719.32	4413.68	0.454113	0.546768	3353.74	902.15	0.268998	0.323883	9000.79	3087.22	0.342994	0.412977
28	12162.7	2766.17	0.22743	0.273834	4201.97	1471.44	0.350179	0.421627	5868.06	2456.94	0.418697	0.504126
29	6610.11	6090.58	0.921404	1.1094	5993.91	1987.32	0.331556	0.399205	5525.66	1572.89	0.284652	0.342731
30	4737.64	3139.41	0.662651	0.797855	3846.27	778.42	0.202383	0.243676	5385.77	3132.11	0.581553	0.70021
31	6272.56	5922.37	0.944172	1.13682	8227.26	1722.85	0.209407	0.252134	3120.24	2938.97	0.941904	1.13409
32	4061.36	1539.83	0.379142	0.4565	2996.12	192.839	0.064363	0.0774953	1040.35	146.144	0.140475	0.169137
33	6118.02	3204.42	0.523767	0.630634	7648.39	1387.97	0.181472	0.218498	7181.9	2490.54	0.34678	0.417535
34	6506.94	3864.45	0.593897	0.715073	2612.27	1141.77	0.437078	0.526257	5515.78	1771.43	0.321156	0.386683
35	6368.09	4102.46	0.644221	0.775664	2992.63	1274.71	0.425948	0.512856	4063.36	682.864	0.168054	0.202343
36	7297.85	4321.53	0.592164	0.712987	6636.2	1884.74	0.284009	0.341956	2791.44	892.244	0.319636	0.384853
37	7541.09	4894.23	0.649008	0.781428	7560.18	1334.76	0.176552	0.212574	1800.9	980.52	0.544462	0.655552
38	5222.85	2675.22	0.512213	0.616723	4468.75	2068.43	0.462864	0.557305	7159.3	1707.43	0.238491	0.287152
39	10752.4	3646.09	0.339094	0.408281	6410.87	1232.86	0.192308	0.231545	10346.3	4906.59	0.474235	0.570995
40	3326.5	2629.64	0.790511	0.951803	6122.55	1907.71	0.311588	0.375163	3443.53	252.585	0.0733505	0.0883166
41	8628.92	3063.21	0.354993	0.427424	6804.53	1719.77	0.252739	0.304307
42	8619.2	5416.6	0.628434	0.756656
43	5285.04	4274.95	0.808878	0.973917

## Sheet: Fig5F EGFPBLM Average per cell
	Average per cell (RPE1 EGFP-BLM)
	BI2536				PP1i 1µM BI2536				PP1i 5µM BI2536
	BLM	PICH	BLM/PICH	Normalised	BLM	PICH	BLM/PICH	Normalised	BLM	PICH	BLM/PICH	Normalised
1	800.731	7563.11	0.105873	1.02717	54.3838	8100.65	0.00671351	0.065134	18.6501	6715.51	0.00277717	0.0269439
2	338.838	9913.96	0.0341779	0.331592	35.9539	8270.47	0.00434727	0.0421769	29.5156	6972.48	0.00423316	0.0410699
3	446.124	8149.8	0.0547405	0.531089	253.307	8260.1	0.0306663	0.297522	49.526	10789.6	0.00459016	0.0445335
4	395.159	6908.41	0.0571996	0.554947	63.3478	8595.74	0.00736967	0.0715	369.989	6065.3	0.0610009	0.591826
5	334.327	10379.1	0.0322115	0.312514	478.052	8792.44	0.0543708	0.527502	67.1455	6385.57	0.0105152	0.102018
6	431.838	8321.25	0.0518957	0.503489	9.52292	9443.79	0.00100838	0.00978323	58.722	5958.29	0.0098555	0.0956174
7	783.758	7672.08	0.102157	0.991122	729.919	7770.43	0.0939354	0.911355	254.841	6640.19	0.0383786	0.372347
8	1136.97	4725.76	0.24059	2.33419	142.418	10821.1	0.0131611	0.127688	61.0912	6226.12	0.00981208	0.0951962
9	516.688	9012.76	0.0573285	0.556198	26.6249	12421.1	0.00214351	0.0207962	163.629	8012.25	0.0204224	0.198137
10	451.978	7228.44	0.0625277	0.60664	518.288	12321.1	0.0420649	0.408111	7.81472	6666.54	0.00117223	0.0113729
11	382.749	4958.91	0.077184	0.748834	298.281	5825.04	0.0512067	0.496804	114.297	7899.78	0.0144684	0.140372
12	901.068	7043.04	0.127937	1.24124	12.634	6893.11	0.00183284	0.0177821	381.226	7299.78	0.0522243	0.506677
13	634.796	5549.31	0.114392	1.10982	72.6526	7035.6	0.0103264	0.100186	94.1107	4390.2	0.0214366	0.207976
14	685.003	6677.56	0.102583	0.995252	903.758	7140.83	0.126562	1.2279	438.086	7828.06	0.0559636	0.542955
15	539.021	8773.1	0.0614401	0.596088	11.9085	7286.4	0.00163435	0.0158564	13.8242	4180.93	0.00330649	0.0320793
16	434.393	4756.82	0.09132	0.88598	60.147	9195.66	0.0065408	0.0634584	15.6559	7264.66	0.00215507	0.0209083
17	646.798	7107.3	0.0910047	0.882922	153.687	8351.66	0.018402	0.178535	36.5088	3733.72	0.00977814	0.0948668
18	939.513	6498.88	0.144565	1.40256	220.06	7402.78	0.0297266	0.288406
19	1337.87	6489.46	0.206161	2.00016	42.047	7221.95	0.00582212	0.0564858
20	1721.92	8589.46	0.200469	1.94494	9.62549	4060.95	0.00237025	0.022996
21	591.924	10522.6	0.0562527	0.54576	434.738	7429.09	0.0585184	0.567741
22	490.894	3546.72	0.138408	1.34282	250.688	8307.72	0.0301753	0.292759
23	540.111	7065.84	0.0764397	0.741613	17.5776	6769.77	0.00259649	0.025191
24	592.6	5483.8	0.108064	1.04843	7.92402	5667.84	0.00139807	0.0135639
25	658.4	3871.6	0.170059	1.6499
26	735.586	7004.6	0.105015	1.01885
27	435.498	5143.17	0.0846751	0.821512
28	697.215	6322.54	0.110275	1.06988
29	906.636	7302.74	0.12415	1.2045

## Sheet: (I) RPE1 BI2536
20231107	RPE1_STB+MG+BI_BLMmPICHCEN.czi
	MG-132_BI2536 (30 min)
	Image 01	Area	PICH	BLM	Image 02				Image 03				Image 04				Image 05				Image 06				Image 07				Image 08				Image 09				Image 10				Image 11				Image 12				Image 13
	Background		2297.9	5203.2	Background		1024.9	2745.3	Background		2272.6	14991.4	Background		2273.5	14702.4	Background		1828	12807.4	Background		1586.4	11164.4	Background		980.7	7072.7	Background		1450.3	8612.9	Background	10629	840.416	4113.28	Background		773.5	5423.4	Background		1051.5	8283.69	Background		3734	16939.8	Background
	1	7	4141.29	7529.29	1	4	2614.5	3124	1	14	5860.5	22035.9	1	35	6090.71	19466.6	1	14	3862.57	16065.4	1	11	3522.18	13751.5	1	4	1770.25	5144.5	1	6	1987	9147.83	1	4	1264.5	5099.75	1	7	2508.14	12920.1	1	3	2719	13082.7	1	29	9747.45	19159.8	1
	2	14	6598.21	6437.86	2	5	2404.4	2987.8	2	8	7439.62	22053	2	16	6103.69	20045.5	2	14	4367.64	15387.7	2	9	3641.89	13448.6	2	8	2203.62	8256.88	2	5	2061.6	8917	2	6	1669.83	5754	2	12	2900.67	13133.7	2	6	2537	19224.5	2	18	9264	19891.4	2
	3	15	7004.87	6021.73	3	6	2809.17	4131.67	3	12	5961.92	20031.2	3	26	4896.46	16593	3	28	5056.75	18259.4	3	9	3721.22	11064.1	3	3	2047	8021.33	3	12	2536	10379	3	7	1654.71	4067	3	7	2373	13538.9	3	12	1809	10566.6	3	13	11437.2	16490.8	3
	4	12	6891.17	6864.5	4	15	2741.33	3141.6	4	19	6072.26	18438.6	4	9	8189.11	26658.1	4	57	4097.35	16993.1	4	13	3475.23	12264.8	4	8	2329.38	10147.4	4	9	2510.44	8836.56	4	8	1392.62	5835.5	4	8	2830.88	10266.9	4	5	1992.4	13730.4	4	11	11974.8	24197	4
	5	18	6192.61	6130.56	5	20	2849.85	3015.9	5	29	7688.07	18539.8	5	2	4671.5	16566	5	17	5089.06	18235	5	24	2844.12	10042.5	5	10	2974	11181.3	5	14	2751.57	9193.93	5	4	1433	4614	5	9	2289.22	8754.78	5	6	3055.83	11163.8	5	14	12195.7	18107.2	5
	6	17	7362.82	6714.18	6	2	2636.5	2637	6	23	9248.22	19935.1	6	25	6427.56	23793.9	6	23	4114	17579.2	6	11	5934.82	16831.8	6	9	2081.89	12335.3	6	12	3047.25	10326.8	6	3	1578.67	5015	6	6	2907.5	9118.17	6	5	2129.4	10716.4	6	8	16735.8	21080.4	6
	7	18	11713.7	7172.78	7	4	2698	3519	7	38	5032.11	17446.8	7	18	4444.11	16169.5	7	26	4241.88	15939.6	7	18	3527.61	11631.2	7	13	2487	11031.6	7	12	2673.92	11466.4	7	9	1884.89	4570.56	7	10	2534.2	8660.4	7	6	2933	13842.3	7	10	12095.3	19727.7	7
	8	18	8075	6870.56	8	19	2556.84	2917.11	8	15	6344.4	18797.7	8	1	4647	16661	8	64	5204.05	21699.6	8	15	3732	15269.8	8	13	2002.77	6808.38	8	13	2776.15	10440.6	8	3	1456.33	4322.33	8	8	2761.12	11380.4	8	20	2506.65	11397.8	8	12	9877.67	17928.9	8
	9	25	6330.52	5779.36	9	10	3810.7	3957.9	9	19	8484.26	19399.1	9	11	4678.45	17896.5	9	67	6346.09	22621.5	9	10	4656.3	16435.5	9	8	1538.62	7656.75	9	9	3441	11312.7	9	4	1673.5	6432.75	9	5	3211.6	13214.4	9	4	2223.75	10447.8	9	8	12338.4	18275.6	9
	10	9	7845	7202.56	10	16	2405.75	2959.56	10	10	6741.6	19654.1	10	12	6253.08	21484	10	97	5798.42	22112.8	10	12	3584.58	12519.5	10	7	1878	7277	10	16	2820.25	10637.7	10	10	1856.8	6426.7	10	5	2549.4	7362.8	10	6	2922.17	13433.8	10	45	11843.5	21892.1	10
	11	13	7665.38	5256.15	11	38	2447.45	3360.42	11	12	7346.92	16954.4	11	15	4548.33	20052.6	11	9	4208.56	17473.3	11	20	3600.5	13278.6	11	9	2930.56	11638.8	11	10	3717.4	11853.3	11	7	1663.29	4574.29	11	8	4594.88	8985.62	11	10	1822.4	8845.3	11	10	13993	22586.2	11
	12	9	7669.33	5387	12	18	2878.44	3857.17	12	9	6748.11	17867.1	12	12	5608.17	15770.5	12	29	5677.34	20981.7	12	19	3258	12763.1	12	5	2441.6	9180.2	12	18	2464.5	9461	12	3	1444.67	4762	12	5	2577.2	7516.2	12	8	2214.88	12945.4	12	13	10543.6	17474.8	12
	13	11	7292.73	5039.36	13	11	3411.09	3540.36	13	34	5371.59	17906.4	13	19	5863.84	19963.6	13	23	6265.52	24109.9	13	20	3741.5	13402.5	13	8	2408.38	13277	13	16	3238.31	11073.1	13	7	1763.57	5134.43	13	8	4080.12	13254.9	13	12	2357.5	12504.9	13	17	9582.82	18040.6	13
	14	18	7758.83	6064.06	14	10	3066.5	3606.4	14	21	5593.76	17233.3	14	13	5896.23	20207.8	14	31	5216.26	19205.8	14	25	3475.88	14918.5	14	15	3108.07	9444.27	14	13	3018.31	9890.77	14	11	1586.91	5689.91	14	14	2487.43	11991.1	14	8	2606.38	12918.1	14	1	11884	18681	14
	15	16	6754.81	5659.5	15	1	2681	3470	15	18	6205.67	18890.1	15	16	5105.44	19231.6	15	49	5202.31	18744.4	15	15	3674.33	13481.5	15	12	2038.83	9389.58	15	14	2705.71	9717.71	15	6	2126.83	5378.67	15	7	3980.43	11902.7	15	10	2324.5	11106.2	15	7	12417.4	23150.7	15
	16	28	5882.64	6074.29	16	14	2774.36	2995	16	6	6670.17	19198.2	16	14	6471.57	19287	16	40	6410.8	21599.3	16	17	3290.88	12360.6	16	17	2112.76	10130.5	16	11	2377.27	10003.6	16	2	1773	3187.5	16	6	2775.17	10459.8	16	17	2069.29	9144.18	16	15	12295	21311.6	16
	17	11	6398.09	6674.64	17	1	2717	3399	17	46	5211.96	17763.3	17	5	4466	17328	17	37	5495.7	20808.4	17	4	3276.5	11669.5	17	9	2699.56	11940	17	17	2235.29	9194	17	5	1738.4	4859.2	17	7	2451.71	8944.86	17	13	1987.62	8766.08	17	15	11055.5	18159.8	17
	18	9	7227.67	6201.56	18	16	2999.5	3621.62	18	11	6117.09	17065.2	18	42	4611.5	18196.4	18	48	4678.75	17004	18	11	3888.18	15996.8	18	18	2258.78	9152.39	18	13	2475.77	10688.5	18	5	1462.2	4974	18	12	3325.42	12460.2	18	13	2049.38	9306.15	18	13	11980.8	17626.4	18
	19	21	6518.38	5692.95	19	20	3526.6	3580	19	30	5122.03	15862.3	19	10	5180.1	18631.5	19	11	5860.64	18965.7	19	14	3525.14	13091.9	19	9	2309.44	10935	19	37	2358.3	8626.11	19	5	1487	4740.4	19	4	3252	7927.25	19	1	2314	10440	19	16	9539.81	24019.1	19
	20	14	7051.71	5523.5	20	9	3580	4289.78	20	77	4587.94	17697.6	20	21	4429.67	16633	20	32	5307.53	19929.1	20	21	2863.48	13701.2	20	3	1866	7632.67	20	23	2363.87	8884.96	20	12	1508	4550.33	20	9	2405.22	6716.67	20	13	2218.92	9061.38	20	1	9207	20284	20
	21	9	6604.33	5842.89	21	2	2828.5	3578.5	21	22	5043.86	13856.7	21	16	4838.69	16399.9	21	18	6181.06	19199.6	21	15	3105.33	10440.8	21	14	1902.71	7448.29	21	16	2767.81	8837.62	21	8	1348.88	4662.75	21	25	2479.28	8314.8	21	10	2623.3	14014.6	21	23	9732.17	19877.3	21
	22	16	6507.69	5606.62	22	20	3289.35	3737.65	22	42	5715.86	15622.5	22	15	5835.6	18207.5	22	25	5501.4	17547.7	22	18	3215.72	11965.1	22	12	1908.58	7778.58	22	14	2639.29	10165.1	22	8	1588.88	4886	22	1	3720	11601	22	11	2524.82	13073.6	22	10	10412.5	19856.3	22
	23	130	4865.05	5783.08	23	10	3115.7	3721.3	23	1	5555	14235	23	19	4393.89	15910.9	23	65	4135.77	17446	23	16	3480.81	11796.3	23	8	2203.75	7783.25	23	8	2254.38	10331.2	23	8	2023	6250.12	23	18	3861.83	11578.1	23	18	2289.11	10636.4	23	1	9701	21081	23
	24	11	6399.18	5722.36	24	32	3278.41	3732.56	24	63	5531.87	16843.6	24	22	4514.18	16858.7	24	9	5108.67	17836	24	10	3798.8	16129.6	24	13	2774.15	10032.6	24	20	2435.4	9257.3	24	7	1524.71	4872	24	3	2610	8124.67	24	4	2116	9482	24	8	12578	18403.2	24
	25	11	6776.64	6214.27	25	1	3182	3720	25	9	6103.44	17280.2	25	6	5605.83	17446	25	24	5296.29	16729.6	25	12	3953	16545.2	25	9	3256.89	12534.2	25	6	2386.33	9882.33	25	5	1408.2	4958.8	25	8	3359.62	12210.9	25	5	2098.2	8815.4	25	24	10914.5	17177.2	25
	26	13	6988.15	5633.38	26	14	2990.14	3537.36	26	27	5473	16958.8	26	19	5423.11	19220.9	26	15	5056.13	19799.1	26	12	3109.75	14409.1	26	3	1683	6415.33	26	10	3333.3	10594.1	26	4	1539.75	5123	26	8	3374.62	8906.75	26	3	2751.33	10716.7	26	12	13095.8	17922	26
	27	2	4736	6363.5	27	16	2915.19	3993.25	27	15	7206.6	15468.9	27	17	6096.82	18344.4	27	26	5044.77	17251.8	27	18	2967.56	12573.8	27	16	1920.06	6675.12	27	7	3681.29	9546.86	27	4	2389	7262.5	27	8	2414.88	10073.2	27	9	2424.78	11582.9	27	6	12181.5	22802.2	27
	28	38	5265.47	5598.87	28	1	3207	3851	28	20	5568.2	15570.5	28	11	5936.09	16884.5	28	19	4291.05	17542.7	28	18	4142.83	10806.2	28	5	2021	8397.4	28	8	2308.38	9992	28	10	1450.9	4673.7	28	5	3106	12376.6	28	8	2742.25	13198.4	28	22	15459.7	19940.5	28
	29	13	9228.54	5574.85	29	18	3049.17	3702.78	29	18	6214.61	16720.3	29	11	6295.82	18024.8	29	22	4163.23	15477.6	29	16	2864.25	14139.2	29	8	1916.75	10262.6	29	17	2461.59	8646.06	29	3	1539.67	4676	29	5	3191.4	13137.8	29	7	2375.57	11769	29	14	15275.7	20966.1	29
	30	11	5828.09	6433.27	30	17	3023	3695	30	48	5368.6	15179.5	30	13	4248.23	13093.8	30	15	4434.13	15021	30	11	3904.27	14347.3	30	9	1980.33	7980.44	30	18	2426.72	8635.22	30	1	1430	5186	30	6	2648.5	11642.2	30	11	1825.73	9394.82	30	26	11416	15904.5	30
	31	7	8230.29	6772.14	31	1	1980	3148	31	8	6183.25	15183.1	31	33	4138.48	16588.1	31	9	4218.67	15805.1	31	13	4166.23	14422.5	31	8	2483.5	12191.8	31	14	2536.29	8955.14	31	4	1573.25	4736.75	31	3	2200.67	9752.33	31	7	2025.43	12233.7	31	14	11307.8	21827.5	31
	32	8	10686.2	8318.5	32	1	1976	3297	32	24	5551.79	14414.5	32	6	5119.67	21147.5					32	12	4154.5	14486.9	32	10	2306.4	8260	32	9	2347.67	8967.56	32	4	1317.25	4801.5	32	5	2281	9020	32	5	2299.6	10700	32	33	12493.5	18303.7	32
	33	9	6163.78	6383.67	33	5	2009.2	3279.8	33	9	6283.89	13668.4	33	16	6409.25	18957.1					33	2	2562	9177.5	33	7	2250.71	8859	33	7	2211.57	9121.86	33	3	1356.67	3537.67	33	2	2850.5	11902					33	9	13820.7	20529.2	33
	34	8	6286.25	5878.5	34	1	2371	2865	34	6	6212.83	14467	34	13	7274.85	19133.9																					34	2	2730	12990.5					34	13	12495.9	20880	34
					35	5	2386.6	2855.4	35	20	6386	17085.4	35	11	5736.64	17433																													35	17	10421.4	21131.2	35
					36	6	2398	3328	36	17	6069.18	14949.2	36	10	4272.9	14843.8																													36	5	9939	18355.4	36
					37	2	2198.5	3091.5					37	13	4806.15	13665.2																																	37
					38	4	2477.25	3571.25
	Background correction		0	0			0	0			0	0			0	0			0	0			0	0			0	0			0	0			0	0			0	0			0	0			0	0
	1		1843.39	2326.09			1589.6	378.7			3587.9	7044.46			3817.21	4764.17			2034.57	3257.96			1935.78	2587.05			789.55	-1928.2			536.7	534.933			424.084	986.469			1734.64	7496.74			1667.5	4798.98			6013.45	2220.03
	2		4300.31	1234.66			1379.5	242.5			5167.02	7061.6			3830.19	5343.1			2539.64	2580.31			2055.49	2284.16			1222.92	1184.18			611.3	304.1			829.417	1640.72			2127.17	7710.27			1485.5	10940.8			5530	2951.59
	3		4706.97	818.533			1784.27	1386.37			3689.32	5039.77			2622.96	1890.56			3228.75	5451.96			2134.82	-100.289			1066.3	948.633			1085.7	1766.1			814.298	-46.2815			1599.5	8115.46			757.5	2282.9			7703.15	-448.954
	4		4593.27	1661.3			1716.43	396.3			3799.66	3447.23			5915.61	11955.7			2269.35	4185.69			1888.83	1100.45			1348.67	3074.68			1060.14	223.656			552.209	1722.22			2057.38	4843.48			940.9	5446.71			8240.82	7257.2
	5		3894.71	927.356			1824.95	270.6			5415.47	3548.43			2398	1863.6			3261.06	5427.6			1257.72	-1121.9			1993.3	4108.6			1301.27	581.029			592.584	500.719			1515.72	3331.38			2004.33	2880.15			8461.71	1167.41
	6		5064.92	1510.98			1611.6	-108.3			6975.62	4943.69			4154.06	9091.48			2286	4771.82			4348.42	5667.42			1101.19	5262.63			1596.95	1713.85			738.251	901.719			2134	3694.77			1077.9	2432.71			13001.8	4140.58
	7		9415.82	1969.58			1673.1	773.7			2759.51	2455.42			2170.61	1467.1			2413.88	3132.18			1941.21	466.822			1506.3	3958.92			1223.62	2853.52			1044.47	457.274			1760.7	3237			1881.5	5558.65			8361.3	2787.9
	8		5777.1	1667.36			1531.94	171.805			4071.8	3806.33			2373.5	1958.6			3376.05	8892.19			2145.6	4105.4			1022.07	-264.315			1325.85	1827.72			615.917	209.052			1987.62	5956.98			1455.15	3114.06			6143.67	989.117
	9		4032.62	576.16			2785.8	1212.6			6211.66	4407.71			2404.95	3194.15			4518.09	9814.14			3069.9	5271.1			557.925	584.05			1990.7	2699.77			833.084	2319.47			2438.1	7791			1172.25	2164.06			8604.38	1335.83
	10		5547.1	1999.36			1380.85	214.262			4469	4662.7			3979.58	6781.6			3970.42	9305.38			1998.18	1355.1			897.3	204.3			1369.95	2024.79			1016.38	2313.42			1775.9	1939.4			1870.67	5150.15			8109.51	4952.29
	11		5367.48	52.9538			1422.55	615.121			5074.32	1963.02			2274.83	5350.2			2380.56	4665.93			2014.1	2114.25			1949.86	4566.08			2267.1	3240.4			822.87	461.004			3821.38	3562.23			770.9	561.612			10259	5646.4
	12		5371.43	183.8			1853.54	1111.87			4475.51	2875.71			3334.67	1068.1			3849.34	8174.26			1671.6	1598.65			1460.9	2107.5			1014.2	848.1			604.251	648.719			1803.7	2092.8			1163.38	4661.69			6809.62	535.046
	13		4994.83	-163.836			2386.19	795.064			3098.99	2914.98			3590.34	5261.23			4437.52	11302.5			2155.1	2238.05			1427.67	6204.3			1788.01	2460.16			923.155	1021.15			3306.62	7831.48			1306	4221.23			5848.82	1100.85
	14		5460.93	860.856			2041.6	861.1			3321.16	2241.89			3622.73	5505.37			3388.26	6398.37			1889.48	3754.08			2127.37	2371.57			1568.01	1277.87			746.493	1576.63			1713.93	6567.67			1554.88	4634.44			8150	1741.2
	15		4456.91	456.3			1656.1	724.7			3933.07	3898.71			2831.94	4529.23			3374.31	5937.01			2087.93	2317.13			1058.13	2316.88			1255.41	1104.81			1286.42	1265.39			3206.93	6479.31			1273	2822.51			8683.43	6210.91
	16		3584.74	871.086			1749.46	249.7			4397.57	4206.77			4198.07	4584.6			4582.8	8791.9			1704.48	1196.25			1132.06	3057.77			926.973	1390.74			932.584	-925.781			2001.67	5036.43			1017.79	860.489			8561	4371.8
	17		4100.19	1471.44			1692.1	653.7			2939.36	2771.93			2192.5	2625.6			3667.7	8000.95			1690.1	505.1			1718.86	4867.3			784.994	581.1			897.984	745.919			1678.21	3521.46			936.115	482.389			7321.53	1220
	18		4929.77	998.356			1974.6	876.325			3844.49	2073.78			2338	3494			2850.75	4196.56			2301.78	4832.42			1278.08	2079.69			1025.47	2075.64			621.784	860.719			2551.92	7036.85			997.885	1022.47			8246.77	686.585
	19		4220.48	489.752			2501.7	834.7			2849.43	870.9			2906.6	3929.1			4032.64	6158.33			1938.74	1927.53			1328.74	3862.3			907.997	13.2081			646.584	627.119			2478.5	2503.85			1262.5	2156.31			5805.81	7079.26
	20		4753.81	320.3			2555.1	1544.48			2315.34	2706.16			2156.17	1930.6			3479.53	7121.69			1277.08	2536.79			885.3	559.967			913.57	272.057			667.584	437.052			1631.72	1293.27			1167.42	777.697			5473	3344.2
	21		4306.43	639.689			1803.6	833.2			2771.26	-1134.72			2565.19	1697.54			4353.06	6392.21			1518.93	-723.6			922.014	375.586			1317.51	224.725			508.459	549.469			1705.78	2891.4			1571.8	5730.91			5998.17	2937.5
	22		4209.79	403.425			2264.45	992.35			3443.26	631.148			3562.1	3505.13			3673.4	4740.32			1629.32	800.656			927.883	705.883			1188.99	1552.17			748.459	772.719			2946.5	6177.6			1473.32	4789.95			6678.5	2916.5
	23		2567.15	579.877			2090.8	976			3282.4	-756.4			2120.39	1208.55			2307.77	4638.55			1894.41	631.913			1223.05	710.55			804.075	1718.35			1182.58	2136.84			3088.33	6154.66			1237.61	2352.76			5967	4141.2
	24		4101.28	519.164			2253.51	987.262			3259.27	1852.22			2240.68	2156.28			3280.67	5028.6			2212.4	4965.2			1793.45	2959.92			985.1	644.4			684.298	758.719			1836.5	2701.27			1064.5	1198.31			8844	1463.45
	25		4478.74	1011.07			2157.1	974.7			3830.84	2288.82			3332.33	2743.6			3468.29	3922.18			2366.6	5380.85			2276.19	5461.52			936.033	1269.43			567.784	845.519			2586.12	6787.48			1046.7	531.712			7180.5	237.408
	26		4690.25	430.185			1965.24	792.057			3200.4	1967.41			3149.61	4518.49			3228.13	6991.67			1523.35	3244.68			702.3	-657.367			1883	1981.2			699.334	1009.72			2601.12	3483.35			1699.83	2432.98			9361.75	982.2
	27		2438.1	1160.3			1890.29	1247.95			4934	477.533			3823.32	3642.01			3216.77	4444.41			1381.16	1409.43			939.362	-397.575			2230.99	933.957			1548.58	3149.22			1641.38	4649.85			1373.28	3299.2			8447.5	5862.37
	28		2967.57	395.668			2182.1	1105.7			3295.6	579.15			3662.59	2182.15			2463.05	4735.34			2556.43	-358.233			1040.3	1324.7			858.075	1379.1			610.484	560.419			2332.5	6953.2			1690.75	4914.69			11725.7	3000.65
	29		6930.64	371.646			2024.27	957.478			3942.01	1728.93			4022.32	3322.42			2335.23	2670.24			1277.85	2974.79			936.05	3189.93			1011.29	33.1588			699.251	562.719			2417.9	7714.4			1324.07	3485.31			11541.7	4026.34
	30		3530.19	1230.07			1998.1	949.7			3096	188.121			1974.73	-1608.63			2606.13	2213.6			2317.87	3182.87			999.633	907.744			976.422	22.3222			589.584	1072.72			1875	6218.77			774.227	1111.13			7682	-1035.3
	31		5932.39	1568.94			955.1	402.7			3910.65	191.725			1864.98	1885.72			2390.67	2997.71			2579.83	3258.14			1502.8	5119.05			1085.99	342.243			732.834	623.469			1427.17	4328.93			973.929	3950.03			7573.79	4887.7
	32		8388.35	3115.3			951.1	551.7			3279.19	-576.858			2846.17	6445.1							2568.1	3322.52			1325.7	1187.3			897.367	354.656			476.834	688.219			1507.5	3596.6			1248.1	2416.31			8759.48	1363.9
	33		3865.88	1180.47			984.3	534.5			4011.29	-1322.96			4135.75	4254.73							975.6	-1986.9			1270.01	1786.3			761.271	508.957			516.251	-575.615			2077	6478.6							10086.7	3589.42
	34		3988.35	675.3			1346.1	119.7			3940.23	-524.4			5001.35	4431.52																							1956.5	7567.1							8761.92	3940.2
	35						1361.7	110.1			4113.4	2094			3463.14	2730.6																															6687.41	4191.44
	36						1373.1	582.7			3796.58	-42.1647			1999.4	141.4																															6205	1415.6
	37						1173.6	346.2							2532.65	-1037.17
	38						1452.35	825.95
	39
	40
	41
	1		1843.39	2326.09			1589.6	378.7			3587.9	7044.46			3817.21	4764.17			2034.57	3257.96			1935.78	2587.05			789.55	0			536.7	534.933			424.084	986.469			1734.64	7496.74			1667.5	4798.98			6013.45	2220.03
	2		4300.31	1234.66			1379.5	242.5			5167.02	7061.6			3830.19	5343.1			2539.64	2580.31			2055.49	2284.16			1222.92	1184.18			611.3	304.1			829.417	1640.72			2127.17	7710.27			1485.5	10940.8			5530	2951.59
	3		4706.97	818.533			1784.27	1386.37			3689.32	5039.77			2622.96	1890.56			3228.75	5451.96			2134.82	0			1066.3	948.633			1085.7	1766.1			814.298	0			1599.5	8115.46			757.5	2282.9			7703.15	0
	4		4593.27	1661.3			1716.43	396.3			3799.66	3447.23			5915.61	11955.7			2269.35	4185.69			1888.83	1100.45			1348.67	3074.68			1060.14	223.656			552.209	1722.22			2057.38	4843.48			940.9	5446.71			8240.82	7257.2
	5		3894.71	927.356			1824.95	270.6			5415.47	3548.43			2398	1863.6			3261.06	5427.6			1257.72	0			1993.3	4108.6			1301.27	581.029			592.584	500.719			1515.72	3331.38			2004.33	2880.15			8461.71	1167.41
	6		5064.92	1510.98			1611.6	0			6975.62	4943.69			4154.06	9091.48			2286	4771.82			4348.42	5667.42			1101.19	5262.63			1596.95	1713.85			738.251	901.719			2134	3694.77			1077.9	2432.71			13001.8	4140.58
	7		9415.82	1969.58			1673.1	773.7			2759.51	2455.42			2170.61	1467.1			2413.88	3132.18			1941.21	466.822			1506.3	3958.92			1223.62	2853.52			1044.47	457.274			1760.7	3237			1881.5	5558.65			8361.3	2787.9
	8		5777.1	1667.36			1531.94	171.805			4071.8	3806.33			2373.5	1958.6			3376.05	8892.19			2145.6	4105.4			1022.07	0			1325.85	1827.72			615.917	209.052			1987.62	5956.98			1455.15	3114.06			6143.67	989.117
	9		4032.62	576.16			2785.8	1212.6			6211.66	4407.71			2404.95	3194.15			4518.09	9814.14			3069.9	5271.1			557.925	584.05			1990.7	2699.77			833.084	2319.47			2438.1	7791			1172.25	2164.06			8604.38	1335.83
	10		5547.1	1999.36			1380.85	214.262			4469	4662.7			3979.58	6781.6			3970.42	9305.38			1998.18	1355.1			897.3	204.3			1369.95	2024.79			1016.38	2313.42			1775.9	1939.4			1870.67	5150.15			8109.51	4952.29
	11		5367.48	52.9538			1422.55	615.121			5074.32	1963.02			2274.83	5350.2			2380.56	4665.93			2014.1	2114.25			1949.86	4566.08			2267.1	3240.4			822.87	461.004			3821.38	3562.23			770.9	561.612			10259	5646.4
	12		5371.43	183.8			1853.54	1111.87			4475.51	2875.71			3334.67	1068.1			3849.34	8174.26			1671.6	1598.65			1460.9	2107.5			1014.2	848.1			604.251	648.719			1803.7	2092.8			1163.38	4661.69			6809.62	535.046
	13		4994.83	0			2386.19	795.064			3098.99	2914.98			3590.34	5261.23			4437.52	11302.5			2155.1	2238.05			1427.67	6204.3			1788.01	2460.16			923.155	1021.15			3306.62	7831.48			1306	4221.23			5848.82	1100.85
	14		5460.93	860.856			2041.6	861.1			3321.16	2241.89			3622.73	5505.37			3388.26	6398.37			1889.48	3754.08			2127.37	2371.57			1568.01	1277.87			746.493	1576.63			1713.93	6567.67			1554.88	4634.44			8150	1741.2
	15		4456.91	456.3			1656.1	724.7			3933.07	3898.71			2831.94	4529.23			3374.31	5937.01			2087.93	2317.13			1058.13	2316.88			1255.41	1104.81			1286.42	1265.39			3206.93	6479.31			1273	2822.51			8683.43	6210.91
	16		3584.74	871.086			1749.46	249.7			4397.57	4206.77			4198.07	4584.6			4582.8	8791.9			1704.48	1196.25			1132.06	3057.77			926.973	1390.74			932.584	0			2001.67	5036.43			1017.79	860.489			8561	4371.8
	17		4100.19	1471.44			1692.1	653.7			2939.36	2771.93			2192.5	2625.6			3667.7	8000.95			1690.1	505.1			1718.86	4867.3			784.994	581.1			897.984	745.919			1678.21	3521.46			936.115	482.389			7321.53	1220
	18		4929.77	998.356			1974.6	876.325			3844.49	2073.78			2338	3494			2850.75	4196.56			2301.78	4832.42			1278.08	2079.69			1025.47	2075.64			621.784	860.719			2551.92	7036.85			997.885	1022.47			8246.77	686.585
	19		4220.48	489.752			2501.7	834.7			2849.43	870.9			2906.6	3929.1			4032.64	6158.33			1938.74	1927.53			1328.74	3862.3			907.997	13.2081			646.584	627.119			2478.5	2503.85			1262.5	2156.31			5805.81	7079.26
	20		4753.81	320.3			2555.1	1544.48			2315.34	2706.16			2156.17	1930.6			3479.53	7121.69			1277.08	2536.79			885.3	559.967			913.57	272.057			667.584	437.052			1631.72	1293.27			1167.42	777.697			5473	3344.2
	21		4306.43	639.689			1803.6	833.2			2771.26	0			2565.19	1697.54			4353.06	6392.21			1518.93	0			922.014	375.586			1317.51	224.725			508.459	549.469			1705.78	2891.4			1571.8	5730.91			5998.17	2937.5
	22		4209.79	403.425			2264.45	992.35			3443.26	631.148			3562.1	3505.13			3673.4	4740.32			1629.32	800.656			927.883	705.883			1188.99	1552.17			748.459	772.719			2946.5	6177.6			1473.32	4789.95			6678.5	2916.5
	23		2567.15	579.877			2090.8	976			3282.4	0			2120.39	1208.55			2307.77	4638.55			1894.41	631.913			1223.05	710.55			804.075	1718.35			1182.58	2136.84			3088.33	6154.66			1237.61	2352.76			5967	4141.2
	24		4101.28	519.164			2253.51	987.262			3259.27	1852.22			2240.68	2156.28			3280.67	5028.6			2212.4	4965.2			1793.45	2959.92			985.1	644.4			684.298	758.719			1836.5	2701.27			1064.5	1198.31			8844	1463.45
	25		4478.74	1011.07			2157.1	974.7			3830.84	2288.82			3332.33	2743.6			3468.29	3922.18			2366.6	5380.85			2276.19	5461.52			936.033	1269.43			567.784	845.519			2586.12	6787.48			1046.7	531.712			7180.5	237.408
	26		4690.25	430.185			1965.24	792.057			3200.4	1967.41			3149.61	4518.49			3228.13	6991.67			1523.35	3244.68			702.3	0			1883	1981.2			699.334	1009.72			2601.12	3483.35			1699.83	2432.98			9361.75	982.2
	27		2438.1	1160.3			1890.29	1247.95			4934	477.533			3823.32	3642.01			3216.77	4444.41			1381.16	1409.43			939.362	0			2230.99	933.957			1548.58	3149.22			1641.38	4649.85			1373.28	3299.2			8447.5	5862.37
	28		2967.57	395.668			2182.1	1105.7			3295.6	579.15			3662.59	2182.15			2463.05	4735.34			2556.43	0			1040.3	1324.7			858.075	1379.1			610.484	560.419			2332.5	6953.2			1690.75	4914.69			11725.7	3000.65
	29		6930.64	371.646			2024.27	957.478			3942.01	1728.93			4022.32	3322.42			2335.23	2670.24			1277.85	2974.79			936.05	3189.93			1011.29	33.1588			699.251	562.719			2417.9	7714.4			1324.07	3485.31			11541.7	4026.34
	30		3530.19	1230.07			1998.1	949.7			3096	188.121			1974.73	0			2606.13	2213.6			2317.87	3182.87			999.633	907.744			976.422	22.3222			589.584	1072.72			1875	6218.77			774.227	1111.13			7682	0
	31		5932.39	1568.94			955.1	402.7			3910.65	191.725			1864.98	1885.72			2390.67	2997.71			2579.83	3258.14			1502.8	5119.05			1085.99	342.243			732.834	623.469			1427.17	4328.93			973.929	3950.03			7573.79	4887.7
	32		8388.35	3115.3			951.1	551.7			3279.19	0			2846.17	6445.1							2568.1	3322.52			1325.7	1187.3			897.367	354.656			476.834	688.219			1507.5	3596.6			1248.1	2416.31			8759.48	1363.9
	33		3865.88	1180.47			984.3	534.5			4011.29	0			4135.75	4254.73							975.6	0			1270.01	1786.3			761.271	508.957			516.251	0			2077	6478.6							10086.7	3589.42
	34		3988.35	675.3			1346.1	119.7			3940.23	0			5001.35	4431.52																							1956.5	7567.1							8761.92	3940.2
	35						1361.7	110.1			4113.4	2094			3463.14	2730.6																															6687.41	4191.44
	36						1373.1	582.7			3796.58	0			1999.4	141.4																															6205	1415.6
	37						1173.6	346.2							2532.65	0
	38						1452.35	825.95
	39
	40
	41
	Average		4670.94	990.509			1772.05	700.093			3902.85	2359.45			3119.17	3552.79			3202.08	5688.44			2009.34	2273.6			1264.58	2274.18			1196.67	1174.49			762.883	952.257			2156.61	5168.97			1288.79	3224.48			7967.49	2908.17
[truncated: 123 more columns]

## Sheet: (I) RPE1 BI PP1 1µM
20231107	RPE1_STB+MG+PP1iuM+BI_BLMmPICHCEN.czi
	MG-132_PP1i 1µM (20min) + BI2536 (30 min)
	Image 01	Area	PICH	BLM	Image 02				Image 03				Image 04				Image 05				Image 06				Image 07				Image 08				Image 09				Image 10				Image 11				Image 12				Image 13
	Background	2282	2969.91	15225.2	Background	2360	2232.79	15170.5	Background	3336	2415.04	18109.7	Background	2180	3354.91	18521.7	Background	3559	4312.36	22145.6	Background	2420	2926.47	20622.1	Background	2121	2419.49	20938.4	Background	2613	2477.95	17134.8	Background	2921	3402.49	19252.4	Background	3374	17659.1	25770.4	Background	3817	3127.78	16350.3	Background	3031	2791.81	16034	Background
	1	6	9975.17	25876.3	1	12	5931.92	15551.3	1	6	8445.5	22534.5	1	3	10565.3	27900	1	7	5865.43	26422.4	1	7	9421.71	26592.4	1	8	8890.12	22307.2	1	8	10605.2	23799.2	1	4	7599.5	22212.2	1	18	23724.5	25728.8	1	4	6238.5	18475	1	5	5908.2	15934.4	1
	2	4	8050.25	24425.2	2	5	4874	13292.6	2	6	4720.67	22815.7	2	7	12094.6	25356.7	2	8	6563.38	22170.2	2	7	4565.71	24264.9	2	6	10922.3	25621.2	2	4	8307.25	25242.8	2	6	8287.67	20677.5	2	7	28525.1	28248.7	2	18	7368.44	19849.5	2	3	5741.67	21374.3	2
	3	1	6515	21794	3	8	6046.38	15072.5	3	6	5644.67	18207.8	3	7	12294.1	26182.9	3	7	6155.14	22425.6	3	12	6730.08	24037.5	3	5	10012.6	20426.8	3	5	9093.8	22921.2	3	5	6391.4	21957.8	3	9	28188.3	26359.7	3	8	6954.25	18513.9	3	7	5381.43	21973.6	3
	4	8	8436.88	22757.8	4	11	5248.82	17041.4	4	6	4879.5	19242.2	4	9	11473.7	22259.9	4	5	8404.8	21529.8	4	8	5945.88	23915.8	4	5	8786	19815.8	4	6	9801.17	18473.3	4	11	7309.64	18400.8	4	15	25358.7	26533.3	4	14	7139	15924.1	4	6	9943.33	17511.7	4
	5	5	7439.6	25561.4	5	3	5019	14981.7	5	10	4914.2	15579.8	5	5	9638.4	22544	5	8	8545	23203.5	5	16	7951.69	22950.3	5	5	9413.6	24724.6	5	5	8194	24096.2	5	11	9829.64	20786.5	5	11	28273.3	26104.7	5	5	7273.4	17747.6	5	6	8308.33	15887.3	5
	6	8	7213.12	17542.8	6	4	5368.25	15919.8	6	6	7350	18756.7	6	7	9602.86	21740.4	6	4	7623.25	24545.2	6	6	5730.5	24433.8	6	9	11542.2	23333.3	6	8	12552.2	22080.8	6	4	7391.75	21520	6	4	24614.2	23457	6	5	8833.8	20996.8	6	6	7815.17	14218.2	6
	7	8	12518.4	27985.1	7	5	4635.6	15177.4	7	4	9323.75	26876.5	7	7	11011.6	21102	7	3	7839.67	21236.7	7	4	7049.5	25436.2	7	4	8017	20348.5	7	19	11987	23582.2	7	6	7011.33	19495.5	7	19	25926.5	30627.6	7	6	10492.8	20476.2	7	6	8389.67	17216	7
	8	12	8056.67	19716.1	8	6	4979.5	16559.8	8	3	8797.67	21011	8	8	9910.25	20558.4	8	6	7719.17	20665.5	8	11	7160.91	22402.4	8	4	9924.5	21168	8	4	12397.2	21621.8	8	17	6894.59	19391.4	8	15	23824.7	23228.4	8	2	8461.5	19356.5	8	5	6178.4	14684.2	8
	9	1	7805	19898	9	3	5734	15282.7	9	4	8830.25	21030.8	9	9	10070.3	22481.3	9	9	6610.44	20276	9	8	6883.5	23393.9	9	6	6502.33	19315	9	9	11686.2	27350.9	9	10	6706	18195.6	9	7	26914.6	23975.1	9	4	9510	19887.5	9	7	6321.86	14906	9
	10	7	9137	23254.1	10	6	5376	17894.8	10	5	7573.2	17413.6	10	10	10333.5	20852	10	6	8185.17	22373	10	8	6056.62	19548.6	10	4	8441.75	21258.8	10	4	8016	21806	10	4	9598.25	21986.5	10	27	24596	25395.5	10	5	8386.8	21769.4	10	5	6720.4	15205	10
	11	13	8816.46	22265.4	11	3	5535	15526.7	11	9	8477.33	21536.6	11	7	11067.6	18172.7	11	6	7096.83	23056	11	7	7580.29	25151.7	11	5	8863	24724.8	11	7	11549.3	25118.9	11	4	8140	20726.2	11	10	26051.9	26806.3	11	10	9558.9	19248.8	11	7	8181.71	16572.6	11
	12	3	6590	22489.3	12	3	5853.33	19054.3	12	6	6748.83	17034.8	12	5	9314	19601.6	12	9	7297.78	25180.2	12	8	7931.5	22144.8	12	5	7303.2	23651.6	12	5	12499	26108.8	12	13	7191.62	17979.7	12	7	25147.1	26348.9	12	8	9689.38	16370.5	12	5	5873.2	15722.6	12
	13	7	6887.14	20435.1	13	5	5787.4	15797.2	13	7	6071.71	18853.9	13	9	9226.89	18873.2	13	4	7918	26692.8	13	2	7288.5	22803	13	4	9391	22183.5	13	7	9607.86	25935.1	13	7	7934	19177	13	21	26152.4	26829.8	13	6	8262.17	22584.5	13	5	5841.6	16128	13
	14	8	9257.25	23550	14	3	5215.67	14378.7	14	2	4689	17700	14	5	12607.6	26224	14	11	7278.55	22989.4	14	7	7827.86	21466.9	14	6	10898.5	22644.8	14	5	9259.6	28044.2	14	5	6975.2	22114.4	14	6	27323.8	26298.2	14	3	6410.33	18616	14	12	5841.83	14250	14
	15	6	11137.3	23252.5	15	7	5468	17020.3	15	4	6615.75	17649.8	15	8	9816.5	21031.4	15	5	6949.8	22961.6	15	5	9170	20712.2	15	8	9911.5	19988.8	15	7	14614.1	30554.3	15	4	5836.75	24351.2	15	37	27904.8	27367.1	15	4	7797.75	17125	15	2	9760.5	21465.5	15
	16	10	8133.1	24244.6	16	4	4596.25	17802.5	16	11	5125.45	16575.9	16	9	11244.4	19039.7	16	17	7616.88	26544.2	16	9	7044	21426.3	16	5	6905.6	23436	16	10	7702.7	21028.5	16	10	7798.2	25054.8	16	15	27374.1	25170.7	16	4	5831.5	17684.2	16	4	6348.5	15131.5	16
	17	6	8091	21010.5	17	2	6978.5	19148	17	5	6254.4	19313.6	17	6	11375	18315.7	17	3	7285.67	20320.7	17	12	7053.67	20570.9	17	7	8933.43	22881.6	17	7	9085.29	21617.4	17	8	7071.12	20072	17	3	26135.3	22986	17	4	7378.75	19661.2	17	7	8665.14	20831.6	17
	18	10	6893	20034.4	18	4	5781	19358.8	18	6	6584	17239.5	18	4	12527.2	23888.2	18	13	6325.62	25308.7	18	8	7941.38	20487.8	18	6	9035.17	17820.8	18	6	10843.7	25554.8	18	10	6677.2	18595.5	18	10	26308.3	24397.2	18	7	11875.9	19985.1	18	7	8388.43	17668.1	18
	19	6	7885.83	22643.3	19	4	6783.75	15108.5	19	5	9848.6	23203.2	19	9	9426.89	19729	19	6	7027	21693.3	19	8	5831.38	20943.5	19	7	13124.4	22805.6	19	6	10018.5	25153.2	19	7	8497.57	20205.6	19	14	25159.6	24491.9	19	3	9239.67	17728.7	19	8	6417.75	15532.9	19
	20	4	11310.5	26459.8	20	8	5785.62	15579.8	20	9	5433	16092.6	20	7	11449.3	18964.6	20	6	7821.33	21025.8	20	9	5573	21789.1	20	6	13447	24379.5	20	3	13847.3	24313.7	20	7	7214.71	21236.9	20	15	26395.9	25134.7	20	10	6628.9	18598.1	20	9	6323.67	15916.6	20
	21	18	8952.89	22611.8	21	7	4206.57	14738.6	21	4	9416.5	20076	21	6	10991.7	19697.3	21	3	6369	20773	21	6	8950.67	21507.2	21	5	8966.4	26381.6	21	7	7706.29	19544.4	21	5	7964.4	17400.6	21	10	28246.4	30073.7	21	7	7492.29	15058.1	21	7	5808.43	15263.3	21
	22	9	9246.33	20987.8	22	7	4985.86	15773	22	5	5142.6	17901.2	22	13	11769.3	24076.8	22	6	8299.5	27358.3	22	6	10123	22420.3	22	8	14013.4	24807.2	22	16	12912.4	23193.8	22	5	8207.4	21116.8	22	18	26890.3	24684	22	7	8168.71	13681.7	22	4	6523.25	14043.8	22
	23	6	7471	20672.3	23	4	4973	18751.5	23	4	6022.75	15509.8	23	6	12049.2	22530.8	23	6	7148	21761.8	23	9	6298.44	20907.1	23	7	16410.1	25305.6	23	7	8621	26232.6	23	7	9170.86	19778.4	23	14	28169.3	27615.2	23	3	7247	19393.7	23	4	7118.5	18152.8	23
	24	8	7950.38	22100.1	24	9	4760.44	14870.4	24	5	5567.4	17773.6	24	3	8533.67	20699	24	5	8712.2	25439	24	7	10841.6	25702.3	24	7	13754.7	22978.7	24	4	10188.2	26005	24	3	7301.67	21305.3	24	7	27679.3	25452.4	24	5	6943.8	17602.6	24	5	7783.2	14787.4	24
	25	5	8602.2	23112.4	25	12	5833.08	17454.2	25	3	4488	20185.7	25	9	10915.4	22923.2	25	22	6742.45	22957.4	25	6	7791.17	21735.8	25	6	13631.5	24037.7	25	13	8795.46	24193.5	25	7	6623.29	16450	25	20	26524.2	29625.8	25	10	8075.1	17758.8	25	11	6050.64	13887.5	25
	26	6	8242.17	22717	26	6	4700.5	14848.2	26	4	4655	15552.8	26	16	11542.2	21366.5	26	15	6685.73	21837.5	26	10	6704.9	23078.4	26	5	10309.8	19622.2	26	4	9301.5	24295.2	26	8	7885.38	17969	26	12	25557.9	23774.4	26	5	11181.4	19410.2	26	6	7830.5	16532.2	26
	27	3	9272	22101.3	27	10	4735.4	15883.5	27	2	7026	18335	27	1	10691	22276	27	3	7023	23854.3	27	6	9441.83	22432.2	27	10	9174.6	22232.1	27	4	10159.5	21144.8	27	8	7116.38	20850.1	27	19	26817.5	27688.5	27	9	5814.56	17117.7	27	8	5653.88	15182.9	27
	28	6	12976.2	22505.3	28	6	4145.17	16271.3	28	4	5325	16610	28	8	11180	21433.1	28	8	6761.25	22940.8	28	6	9028.67	23224.3	28	14	10815.1	20216.3	28	2	11358.5	29063	28	9	6617.78	24738.9	28	9	24580	29311.8	28	6	7480	16781.2	28	5	6643.4	12562	28
	29	12	6030.17	19693	29	3	6464	18642.3	29	3	5168.67	16175.3	29	7	8861.86	22400.7	29	6	9699.83	22937.7	29	4	8337.25	23726	29	8	12174	21322	29	21	7126.24	21224	29	5	7646.8	20678	29	15	24741.1	24259.9	29	5	6774.2	17076.4	29	4	10949.8	22158	29
	30	1	6146	20298	30	7	4998.71	16132.4	30	5	5878.2	15245.6	30	11	12482.8	21635.4	30	9	7059.67	21285.4	30	15	5999.53	20285	30	6	14921.5	25207.8	30	3	11488	23646	30	6	6281	20503.2	30	9	23649.7	24374.4	30	5	8762	22203.6	30	3	7731	14768	30
	31	3	7415	18768.3	31	1	5210	15051	31	7	4724.14	16853.3	31	2	7835.5	17585.5	31	4	10209.5	26754.2	31	9	9517.11	22971	31	6	8429.83	25331.7	31	3	8161.33	24753.3	31	3	9284.33	20682.7	31	9	26205.2	28291.3	31	7	7010.14	22280.7	31	7	6561.29	13180.6	31
	32	4	9568.25	24716.2					32	5	6984.2	19870					32	7	6014.71	28019.1	32	6	8192.17	23068.3	32	7	10540.7	22805.4	32	11	7225.27	21155.5	32	16	8458.5	24150.8					32	4	6475	19624.5	32	5	7810.4	14978.2	32
	33	4	9036.5	24449													33	5	5415.4	26441					33	2	8694.5	26971.5																	33	4	10033.8	17156	33
	34	12	7511.58	21080.8																																									34	4	5030.25	15248.2
	35	11	6437.27	20747.1
	Background correction		0	0			0	0			0	0			0	0			0	0			0	0			0	0			0	0			0	0			0	0			0	0			0	0
	1		7005.26	10651.1			3699.13	380.799			6030.46	4424.82			7210.42	9378.28			1553.07	4276.78			6495.24	5970.35			6470.63	1368.84			8127.3	6664.47			4197.01	2959.8			6065.37	-41.6029			3110.72	2124.74			3116.39	-99.637
	2		5080.34	9200.05			2641.21	-1877.93			2305.62	4705.99			8739.66	6835			2251.02	24.6032			1639.24	3642.78			8502.84	4682.75			5829.3	8107.97			4885.18	1425.05			10866	2478.28			4240.66	3499.24			2949.86	5340.3
	3		3545.09	6568.8			3813.59	-98.0339			3229.62	98.155			8939.23	7661.14			1842.79	279.925			3803.61	3415.42			7593.11	-511.613			6615.85	5786.42			2988.91	2705.35			10529.2	589.23			3826.47	2163.62			2589.62	5939.53
	4		5466.97	7532.55			3016.03	1870.83			2464.46	1132.49			8118.76	3738.17			4092.44	-615.847			3019.4	3293.67			6366.51	-1122.61			7323.22	1338.55			3907.15	-851.629			7699.53	762.897			4011.22	-426.188			7151.52	1477.63
	5		4469.69	10336.2			2786.21	-188.867			2499.16	-2529.88			6283.49	4022.28			4232.64	1057.85			5025.22	2328.23			6994.11	3786.19			5716.05	6961.42			6427.15	1534.01			10614.1	334.291			4145.62	1397.34			5516.52	-146.704
	6		4243.22	2317.55			3135.46	749.216			4934.96	646.988			6247.95	3218.71			3310.89	2399.6			2804.03	3811.75			9122.73	2394.92			10074.3	4945.97			3989.26	2267.55			6955.12	-2313.44			5706.02	4646.54			5023.36	-1815.87
	7		9548.47	12759.9			2402.81	6.8661			6908.71	8766.82			7656.66	2580.28			3527.31	-908.98			4123.03	4814.17			5597.51	-589.913			9509.05	6447.43			3608.85	243.053			8267.39	4857.2			7365.05	4125.91			5597.86	1181.96
	8		5086.76	4490.88			2746.71	1389.3			6382.62	2901.32			6555.34	2036.66			3406.81	-1480.15			4234.44	1780.28			7505.01	229.587			9919.3	4486.97			3492.1	138.905			6165.53	-2542.04			5333.72	3006.24			3386.59	-1349.84
	9		4835.09	4672.8			3501.21	112.133			6415.21	2921.07			6715.42	3959.62			2298.09	-1869.65			3957.03	2771.79			4082.84	-1623.41			9208.28	10216.1			3303.51	-1056.85			9255.44	-1795.29			6382.22	3537.24			3530.05	-1128.04
	10		6167.09	8028.94			3143.21	2724.3			5158.16	-696.078			6978.59	2330.28			3872.81	227.353			3130.15	-1073.46			6022.26	320.337			5538.05	4671.22			6195.76	2734.05			6936.83	-374.955			5259.02	5419.14			3928.59	-829.037
	11		5846.55	7040.18			3302.21	356.133			6062.29	3426.88			7712.66	-349.001			2784.48	910.353			4653.82	4529.63			6443.51	3786.39			9071.34	7984.08			4737.51	1473.8			8392.77	1035.86			6431.12	2898.54			5389.9	538.534
	12		3620.09	7264.13			3620.55	3883.8			4333.79	-1074.85			5959.09	1079.88			2985.42	3034.58			5005.03	1522.67			4883.71	2713.19			10021.1	8974.02			3789.13	-1272.76			7488.01	578.421			6561.59	20.2404			3081.39	-311.437
	13		3917.24	5209.94			3554.61	626.666			3656.67	744.179			5871.98	351.507			3605.64	4547.1			4362.03	2180.92			6971.51	1245.09			7129.91	8800.36			4531.51	-75.4474			8493.25	1059.33			5134.39	6234.24			3049.79	93.963
	14		6287.34	8324.8			2982.88	-791.867			2273.96	-409.678			9252.69	7702.28			2966.19	843.717			4901.39	844.777			8479.01	1706.42			6781.65	10909.4			3572.71	2861.95			9664.7	527.73			3282.55	2265.74			3050.02	-1784.04
	15		8167.43	8027.3			3235.21	1849.75			4200.71	-459.928			6461.59	2509.66			2637.44	815.953			6243.53	90.1198			7492.01	-949.663			12136.2	13419.5			2434.26	5098.8			10245.7	1596.7			4669.97	774.74			6968.69	5431.46
	16		5163.19	9019.4			2363.46	2631.97			2710.41	-1533.77			7889.53	517.951			3304.53	4398.59			4117.53	804.253			4486.11	2497.59			5224.75	3893.72			4395.71	5802.35			9715	-599.77			2703.72	1333.99			3556.69	-902.537
	17		5121.09	5785.3			4745.71	3977.47			3839.36	1203.92			8020.09	-206.049			2973.31	-1824.98			4127.2	-51.1635			6513.94	1943.16			6607.34	4482.65			3668.64	819.553			8476.2	-2784.44			4250.97	3310.99			5873.33	4797.53
	18		3923.09	4809.2			3548.21	4188.22			4168.96	-870.178			9172.34	5366.53			2013.26	3163.05			5014.9	-134.33			6615.67	-3117.58			8365.72	8420.05			3274.71	-656.947			8649.17	-1373.24			8748.08	3634.88			5596.62	1634.11
	19		4915.93	7418.13			4550.96	-62.0339			7433.56	5093.52			6071.98	1207.28			2714.64	-452.313			2904.9	321.42			10704.9	1867.16			7540.55	8018.39			5095.08	953.124			7500.44	-1278.51			6111.89	1378.41			3625.94	-501.162
	20		8340.59	11234.5			3552.84	409.216			3017.96	-2017.12			8094.37	442.856			3508.98	-1119.81			2646.53	1167.03			11027.5	3441.09			11369.4	7178.89			3812.23	1984.41			8736.73	-635.703			3501.12	2247.84			3531.86	-117.481
	21		5982.98	7386.63			1973.79	-431.962			7001.46	1966.32			7636.76	1175.62			2056.64	-1372.65			6024.2	885.087			6546.91	5443.19			5228.34	2409.65			4561.91	-1851.85			10587.3	4303.26			4364.5	-1292.12			3016.62	-770.751
	22		6276.43	5762.58			2753.07	602.466			2727.56	-208.478			8414.4	5555.05			3987.14	5212.69			7196.53	1798.25			11593.9	3868.84			10434.5	6058.97			4804.91	1864.35			9231.14	-1086.44			5040.93	-2668.55			3731.44	-1990.29
	23		4501.09	5447.13			2740.21	3580.97			3607.71	-2599.93			8694.26	4009.12			2835.64	-383.813			3371.97	285.031			13990.7	4367.16			6143.05	9097.79			5768.37	525.981			10510.2	1844.78			4119.22	3043.41			4326.69	2118.71
	24		4980.47	6874.92			2527.66	-300.089			3152.36	-336.078			5178.76	2177.28			4399.84	3293.35			7915.1	5080.21			11335.2	2040.3			7710.3	8870.22			3899.18	2052.89			10020.2	-318.008			3816.02	1252.34			4991.39	-1246.64
	25		5632.29	7887.2			3600.3	2283.63			2072.96	2075.99			7560.53	4401.51			2430.1	811.717			4864.7	1113.75			11212	3099.25			6317.52	7058.68			3220.8	-2802.45			8865.02	3855.41			4947.32	1408.54			3258.83	-2146.49
	26		5272.26	7491.8			2467.71	-322.367			2239.96	-2556.93			8187.28	2844.78			2373.38	-308.113			3778.43	2456.32			7890.31	-1316.21			6823.55	7160.47			4482.89	-1283.45			7898.78	-1996.02			8053.62	3059.94			5038.69	498.13
	27		6302.09	6876.13			2502.61	712.966			4610.96	225.322			7336.09	3754.28			2710.64	1708.69			6515.36	1810.09			6755.11	1293.69			7681.55	4009.97			3713.89	1597.68			9158.39	1918.04			2686.77	767.407			2862.07	-851.162
	28		10006.3	7280.13			1912.38	1100.8			2909.96	-1499.68			7825.09	2911.41			2448.89	795.103			6102.2	2602.25			8395.58	-722.128			8880.55	11928.2			3215.29	5486.44			6920.87	3541.34			4352.22	430.907			3851.59	-3472.04
	29		3060.26	4467.8			4231.21	3471.8			2753.62	-1934.35			5506.95	3879			5387.48	792.02			5410.78	3103.92			9754.51	383.587			4648.29	4089.22			4244.31	1425.55			7082	-1510.57			3646.42	726.14			8157.94	6123.96
	30		3176.09	5072.8			2765.93	961.895			3463.16	-2864.08			9127.91	3113.65			2747.31	-860.202			3073.06	-337.08			12502	4269.42			9010.05	6511.22			2878.51	1250.72			5990.53	-1395.99			5634.22	5853.34			4939.19	-1266.04
	31		4445.09	3543.13			2977.21	-119.534			2309.1	-1256.39			4480.59	-936.216			5897.14	4608.6			6590.64	2348.92			6010.34	4393.25			5683.39	7618.55			5881.85	1430.22			8546.09	2520.9			3882.36	5930.45			3769.48	-2853.47
	32		6598.34	9491.05							4569.16	1760.32							1702.36	5873.5			5265.7	2446.25			8121.22	1867.02			4747.33	4020.67			5056.01	4898.37							3347.22	3274.24			5018.59	-1055.84
	33		6066.59	9223.8															1103.04	4295.35							6275.01	6033.09																			7241.94	1121.96
	34		4541.68	5855.63																																											2238.44	-785.787
	35		3467.37	5521.89
	36
	37
	38
	39
	40
	41
	1		7005.26	10651.1			3699.13	380.799			6030.46	4424.82			7210.42	9378.28			1553.07	4276.78			6495.24	5970.35			6470.63	1368.84			8127.3	6664.47			4197.01	2959.8			6065.37	0			3110.72	2124.74			3116.39	0
	2		5080.34	9200.05			2641.21	0			2305.62	4705.99			8739.66	6835			2251.02	24.6032			1639.24	3642.78			8502.84	4682.75			5829.3	8107.97			4885.18	1425.05			10866	2478.28			4240.66	3499.24			2949.86	5340.3
	3		3545.09	6568.8			3813.59	0			3229.62	98.155			8939.23	7661.14			1842.79	279.925			3803.61	3415.42			7593.11	0			6615.85	5786.42			2988.91	2705.35			10529.2	589.23			3826.47	2163.62			2589.62	5939.53
	4		5466.97	7532.55			3016.03	1870.83			2464.46	1132.49			8118.76	3738.17			4092.44	0			3019.4	3293.67			6366.51	0			7323.22	1338.55			3907.15	0			7699.53	762.897			4011.22	0			7151.52	1477.63
	5		4469.69	10336.2			2786.21	0			2499.16	0			6283.49	4022.28			4232.64	1057.85			5025.22	2328.23			6994.11	3786.19			5716.05	6961.42			6427.15	1534.01			10614.1	334.291			4145.62	1397.34			5516.52	0
	6		4243.22	2317.55			3135.46	749.216			4934.96	646.988			6247.95	3218.71			3310.89	2399.6			2804.03	3811.75			9122.73	2394.92			10074.3	4945.97			3989.26	2267.55			6955.12	0			5706.02	4646.54			5023.36	0
	7		9548.47	12759.9			2402.81	6.8661			6908.71	8766.82			7656.66	2580.28			3527.31	0			4123.03	4814.17			5597.51	0			9509.05	6447.43			3608.85	243.053			8267.39	4857.2			7365.05	4125.91			5597.86	1181.96
	8		5086.76	4490.88			2746.71	1389.3			6382.62	2901.32			6555.34	2036.66			3406.81	0			4234.44	1780.28			7505.01	229.587			9919.3	4486.97			3492.1	138.905			6165.53	0			5333.72	3006.24			3386.59	0
	9		4835.09	4672.8			3501.21	112.133			6415.21	2921.07			6715.42	3959.62			2298.09	0			3957.03	2771.79			4082.84	0			9208.28	10216.1			3303.51	0			9255.44	0			6382.22	3537.24			3530.05	0
	10		6167.09	8028.94			3143.21	2724.3			5158.16	0			6978.59	2330.28			3872.81	227.353			3130.15	0			6022.26	320.337			5538.05	4671.22			6195.76	2734.05			6936.83	0			5259.02	5419.14			3928.59	0
	11		5846.55	7040.18			3302.21	356.133			6062.29	3426.88			7712.66	0			2784.48	910.353			4653.82	4529.63			6443.51	3786.39			9071.34	7984.08			4737.51	1473.8			8392.77	1035.86			6431.12	2898.54			5389.9	538.534
	12		3620.09	7264.13			3620.55	3883.8			4333.79	0			5959.09	1079.88			2985.42	3034.58			5005.03	1522.67			4883.71	2713.19			10021.1	8974.02			3789.13	0			7488.01	578.421			6561.59	20.2404			3081.39	0
	13		3917.24	5209.94			3554.61	626.666			3656.67	744.179			5871.98	351.507			3605.64	4547.1			4362.03	2180.92			6971.51	1245.09			7129.91	8800.36			4531.51	0			8493.25	1059.33			5134.39	6234.24			3049.79	93.963
	14		6287.34	8324.8			2982.88	0			2273.96	0			9252.69	7702.28			2966.19	843.717			4901.39	844.777			8479.01	1706.42			6781.65	10909.4			3572.71	2861.95			9664.7	527.73			3282.55	2265.74			3050.02	0
	15		8167.43	8027.3			3235.21	1849.75			4200.71	0			6461.59	2509.66			2637.44	815.953			6243.53	90.1198			7492.01	0			12136.2	13419.5			2434.26	5098.8			10245.7	1596.7			4669.97	774.74			6968.69	5431.46
	16		5163.19	9019.4			2363.46	2631.97			2710.41	0			7889.53	517.951			3304.53	4398.59			4117.53	804.253			4486.11	2497.59			5224.75	3893.72			4395.71	5802.35			9715	0			2703.72	1333.99			3556.69	0
	17		5121.09	5785.3			4745.71	3977.47			3839.36	1203.92			8020.09	0			2973.31	0			4127.2	0			6513.94	1943.16			6607.34	4482.65			3668.64	819.553			8476.2	0			4250.97	3310.99			5873.33	4797.53
	18		3923.09	4809.2			3548.21	4188.22			4168.96	0			9172.34	5366.53			2013.26	3163.05			5014.9	0			6615.67	0			8365.72	8420.05			3274.71	0			8649.17	0			8748.08	3634.88			5596.62	1634.11
	19		4915.93	7418.13			4550.96	0			7433.56	5093.52			6071.98	1207.28			2714.64	0			2904.9	321.42			10704.9	1867.16			7540.55	8018.39			5095.08	953.124			7500.44	0			6111.89	1378.41			3625.94	0
	20		8340.59	11234.5			3552.84	409.216			3017.96	0			8094.37	442.856			3508.98	0			2646.53	1167.03			11027.5	3441.09			11369.4	7178.89			3812.23	1984.41			8736.73	0			3501.12	2247.84			3531.86	0
	21		5982.98	7386.63			1973.79	0			7001.46	1966.32			7636.76	1175.62			2056.64	0			6024.2	885.087			6546.91	5443.19			5228.34	2409.65			4561.91	0			10587.3	4303.26			4364.5	0			3016.62	0
	22		6276.43	5762.58			2753.07	602.466			2727.56	0			8414.4	5555.05			3987.14	5212.69			7196.53	1798.25			11593.9	3868.84			10434.5	6058.97			4804.91	1864.35			9231.14	0			5040.93	0			3731.44	0
	23		4501.09	5447.13			2740.21	3580.97			3607.71	0			8694.26	4009.12			2835.64	0			3371.97	285.031			13990.7	4367.16			6143.05	9097.79			5768.37	525.981			10510.2	1844.78			4119.22	3043.41			4326.69	2118.71
	24		4980.47	6874.92			2527.66	0			3152.36	0			5178.76	2177.28			4399.84	3293.35			7915.1	5080.21			11335.2	2040.3			7710.3	8870.22			3899.18	2052.89			10020.2	0			3816.02	1252.34			4991.39	0
	25		5632.29	7887.2			3600.3	2283.63			2072.96	2075.99			7560.53	4401.51			2430.1	811.717			4864.7	1113.75			11212	3099.25			6317.52	7058.68			3220.8	0			8865.02	3855.41			4947.32	1408.54			3258.83	0
	26		5272.26	7491.8			2467.71	0			2239.96	0			8187.28	2844.78			2373.38	0			3778.43	2456.32			7890.31	0			6823.55	7160.47			4482.89	0			7898.78	0			8053.62	3059.94			5038.69	498.13
	27		6302.09	6876.13			2502.61	712.966			4610.96	225.322			7336.09	3754.28			2710.64	1708.69			6515.36	1810.09			6755.11	1293.69			7681.55	4009.97			3713.89	1597.68			9158.39	1918.04			2686.77	767.407			2862.07	0
	28		10006.3	7280.13			1912.38	1100.8			2909.96	0			7825.09	2911.41			2448.89	795.103			6102.2	2602.25			8395.58	0			8880.55	11928.2			3215.29	5486.44			6920.87	3541.34			4352.22	430.907			3851.59	0
	29		3060.26	4467.8			4231.21	3471.8			2753.62	0			5506.95	3879			5387.48	792.02			5410.78	3103.92			9754.51	383.587			4648.29	4089.22			4244.31	1425.55			7082	0			3646.42	726.14			8157.94	6123.96
	30		3176.09	5072.8			2765.93	961.895			3463.16	0			9127.91	3113.65			2747.31	0			3073.06	0			12502	4269.42			9010.05	6511.22			2878.51	1250.72			5990.53	0			5634.22	5853.34			4939.19	0
	31		4445.09	3543.13			2977.21	0			2309.1	0			4480.59	0			5897.14	4608.6			6590.64	2348.92			6010.34	4393.25			5683.39	7618.55			5881.85	1430.22			8546.09	2520.9			3882.36	5930.45			3769.48	0
	32		6598.34	9491.05							4569.16	1760.32							1702.36	5873.5			5265.7	2446.25			8121.22	1867.02			4747.33	4020.67			5056.01	4898.37							3347.22	3274.24			5018.59	0
	33		6066.59	9223.8															1103.04	4295.35							6275.01	6033.09																			7241.94	1121.96
	34		4541.68	5855.63																																											2238.44	0
	35		3467.37	5521.89
	36
	37
	38
	39
	40
	41
	Average		5458.85	7110.7			3122.4	1221.65			4045.14	1315.44			7351.63	3185.81			3029.13	1617.29			4634.9	2100.6			7947.22	2092.17			7669.28	6891.91			4188.57	1672.94			8565.38	1025.92			4833.34	2492.7			4381.1	1067.58
[truncated: 115 more columns]

## Sheet: (I) RPE1 BI PP1i 5µM
20231107	RPE1_STB+MG+PP1i5uM+BI_BLMmPICHCEN.czi
	MG-132_PP1i 5µM (20min) + BI2536 (30 min)
	Image 01	Area	PICH	BLM	Image 02				Image 03				Image 04				Image 05				Image 06				Image 07				Image 08				Image 09				Image 10				Image 11				Image 12				Image 13
	Background	2963	4730.5	43133.4	Background	2511	4503.1	34646.5	Background	3474	6754.9	41404.8	Background	2398	4047.1	33933.2	Background	3823	3803.1	26086.1	Background	2932	4857.59	40034.1	Background	2541	3456.82	33026	Background	2770	3277.32	30476.1	Background	2692	3524.93	33020.7	Background	2339	3147.53	26793.3	Background	2847	4641.63	30985	Background	2285	4451.91	34219.2	Background
	1	5	13781	48124.4	1	7	12660.4	41904.1	1	9	21236.6	38848.3	1	8	12596.8	39000.4	1	7	6348	30836.7	1	5	22200.6	41536.8	1	6	11449.8	39108.7	1	7	5346.71	29086.7	1	7	13259.6	27056.4	1	17	4561.82	23886.6	1	7	7000.57	35077.7	1	6	9346.5	41194.2	1
	2	6	10904	48510.8	2	12	11723.7	40983.2	2	26	16701.9	41960.8	2	4	20977.8	38443.5	2	5	6415	26238.4	2	16	14457.7	31953.8	2	1	9467	35999	2	8	6804	26904.8	2	8	10575.2	25335.9	2	5	4553	23006.4	2	27	7110.59	35428.5	2	8	9718.12	39411.6	2
	3	16	10892.7	43393.7	3	16	14844.3	41330.4	3	2	16373.5	43016	3	6	22697.7	36580.8	3	5	11647.2	32586.8	3	12	19660.4	37318	3	10	9646.4	36561.7	3	13	6451.54	31229.9	3	6	10982.8	32734.7	3	8	7939.75	23796.1	3	9	11011.9	34823.8	3	10	11464.6	33041.5	3
	4	11	10008.9	43235.2	4	1	9787	39018	4	6	23744.5	43423.5	4	8	17082.9	30365.6	4	3	7299.33	33967.3	4	12	18644.2	38829.5	4	8	6824.38	41029.5	4	6	10011.8	26529	4	11	9752.36	28158.1	4	18	5142.78	24770.7	4	7	9091.14	35653.9	4	9	11229.7	34871.8	4
	5	6	11972.7	45480	5	9	11703	33800.6	5	8	17106.9	42270.4	5	5	12697.6	31219.2	5	10	5709	26431.8	5	5	19904.2	41340.8	5	7	12143.1	33171.7	5	2	7735.5	25428	5	6	11819.5	27026.2	5	6	9280.83	24907.3	5	8	15006.1	35593.9	5	8	9409.25	32202.6	5
	6	6	11352.5	46053.7	6	5	9925.4	41941	6	12	16242.9	42886.6	6	5	20441.4	42398.2	6	14	7757.07	33151.8	6	13	15208.3	33808.2	6	6	11735.7	37674.8	6	8	7918.75	26977.9	6	11	9301.18	25303.3	6	7	9251	25289.9	6	7	10183.3	34859.4	6	24	9686.54	32199	6
	7	11	11605.1	40893	7	2	9698	37954.5	7	15	16885.9	45540.9	7	6	10170.5	35036.7	7	9	8346.33	32523.6	7	11	17012.5	40044.4	7	6	8654.83	38478.8	7	9	6314.67	32442.8	7	11	9023.45	28478.5	7	8	6896.25	25550.4	7	9	13079.4	27485.4	7	13	8333	36185.2	7
	8	6	13860.2	43766.2	8	18	14994.8	38544.5	8	14	15047.6	43958.8	8	12	12497.8	30775.3	8	9	4874.33	34375.3	8	9	12789.6	41802.4	8	2	10014.5	28639	8	20	6722.65	30857.8	8	32	9871.47	28242.7	8	6	6138.33	24946.5	8	5	16762.6	34151.4	8	6	8832.67	36220.2	8
	9	7	14405.7	44739.9	9	7	14208.9	41586.1	9	9	16013.4	42163.9	9	14	16266.4	30533.4	9	10	7763.4	28758.1	9	5	12310.2	40426.8	9	8	10516.4	29482.2	9	1	6609	29560	9	16	10049.1	27964.8	9	13	5938.85	25284.8	9	11	13287.7	29233.2	9	6	10977.3	34280.5	9
	10	8	11369.2	41498.9	10	7	14303.1	38495.7	10	8	14915.2	43066	10	19	10834.8	34207.1	10	9	6567.44	31048	10	1	11971	39939	10	1	6314	33779	10	8	7518.12	29074.4	10	7	10886.3	31418.7	10	12	5999.83	26286.6	10	11	13566.5	29740.1	10	1	9535	33487	10
	11	6	15065.2	47601	11	30	11342.9	38083.3	11	14	15840.6	43715.1	11	7	12244.9	33516.3	11	8	8645	25448.9	11	11	18275.5	44031.5	11	8	6374.62	32244.2	11	5	9810.2	31702.6	11	7	8518.57	36397.7	11	6	6872.33	27419.2	11	10	7999	32647.6	11	4	9598.5	35833.8	11
	12	17	13247.9	46463.1	12	60	16629.2	42665.2	12	56	15916.4	41884.7	12	11	13605.3	31923.5	12	6	7355.83	26987.5	12	1	12044	41395	12	5	8164	36047.8	12	9	7586.44	29001.8	12	7	12293.6	33194.7	12	1	6412	22385	12	3	8774.33	28815.7	12	13	14517.7	36867.2	12
	13	6	6718.5	41987.5	13	24	14198.2	37820.8	13	7	16281.3	44431.4	13	4	12042.8	29692.8	13	10	7266.8	25226.7	13	8	14235.6	42838.4	13	17	9958.24	31103.8	13	22	9605.45	28220.3	13	17	9388.29	31617.5	13	11	6659.73	22643.4	13	7	10605.4	32759.3	13	9	13364.7	32823.1	13
	14	14	10918.3	40637.6	14	1	11201	37400	14	8	18237	45300	14	5	14841.6	35126	14	6	6994.83	31326.5	14	7	19165.9	46411.3	14	9	9320.56	30174	14	17	5806.65	29248.3	14	14	9723.29	28896.6	14	4	7527.75	25519.8	14	28	14049.9	32699.6	14	7	10241.3	39846.6	14
	15	10	11625.6	43318.7	15	1	14292	39605	15	8	16718.9	40845.2	15	12	12474.2	30106	15	19	5575.95	29684.7	15	6	14109.8	38860	15	2	10000.5	34409	15	7	11501.3	33292.6	15	3	10840.7	34395.3	15	8	5068.62	28708.6	15	12	10830.5	28808.8	15	8	9034.75	35756.2	15
	16	1	6579	42635	16	13	14254	38421.6	16	1	15419	42203	16	1	9529	31723	16	6	7574.83	25693.2	16	4	16445	42092.2	16	6	10123.8	36369.7	16	2	5761.5	27653.5	16	6	9465.17	36768.5	16	16	7730.06	25957.7	16	7	11570.6	31285.4	16	13	8808.15	30999.9	16
	17	12	12046.2	40236.2	17	11	19526.6	41401.7	17	14	17534.4	44741.3	17	27	9600.11	31449.5	17	5	6880.2	26119.6	17	9	15122	37046.3	17	13	7540	32150.7	17	15	7988.13	30575.8	17	26	9441.08	28280.1	17	8	7079.75	25176.9	17	9	9543.33	24730.9	17	6	16495.5	43124.8	17
	18	13	13697.3	42906.8	18	10	23597.8	42314.6	18	8	14349.8	45708.5	18	5	15417.8	38155.6	18	7	6353.14	31522.3	18	6	22666.3	42910.5	18	5	10429.8	39636.4	18	1	7718	28908	18	10	8464.3	38812.1	18	10	7516.6	26017.4	18	9	12460.3	26139.3	18	14	9901.29	39656.4	18
	19	9	12291.8	42508.8	19	11	11924.7	38567.8	19	11	19428.5	43513.8	19	8	13695.4	31604.4	19	10	5771.5	27890.8	19	12	13163.1	44939.2	19	7	8567.14	34051.9	19	10	7510.1	31527.3	19	10	10635.9	31988	19	7	7001.29	27295.3	19	8	11997.9	34165.5	19	10	10575.3	34109	19
	20	11	10976.8	37333.5	20	24	10600.3	33868.8	20	14	16413.6	43179.9	20	7	13574.7	34045	20	9	7353	26860.1	20	8	13487.6	37707.9	20	1	7345	35806	20	1	7482	30857	20	5	10793.6	36436.6	20	12	6815.58	29412.2	20	10	10425	29476.7	20	9	12420.4	34893.8	20
	21	16	15172.1	42365.1	21	8	14444.4	41783.4	21	7	17650.1	47049.1	21	7	12154.4	35990.6	21	6	5836.67	33684.3	21	7	13194.7	40499	21	5	10417.6	35714.2	21	6	10808.5	31408.3	21	10	8163.5	39970.8	21	8	6599.38	31131	21	22	14739	29506.5	21	6	11359.7	35186.3	21
	22	10	10412.7	43928.3	22	3	9468.33	31371.7	22	8	15384.2	44522.8	22	6	17445.8	40184.7	22	10	7194.3	26680.2	22	5	14234.4	43623.4	22	2	7386.5	35286.5	22	7	10065.1	33425.6	22	6	11594	33914.8	22	5	5961	30484.6	22	11	15343	34169.2	22	14	11343.2	32919.6	22
	23	7	15561.6	49329.7	23	14	9555.14	34106.9	23	9	17266.1	45673.1	23	13	16884.4	32639.5	23	7	8372.86	26844	23	11	18714.8	41546.5	23	14	7438.79	30701.9	23	9	8932.44	26271.1	23	11	11952.6	42971.4	23	11	8549.55	27105.8	23	26	8544.08	28609.1	23	16	8438.5	37619.7	23
	24	15	11305.1	45358.8	24	11	15244.5	39279.9	24	20	15139.9	39066.2	24	9	19520	41081.2	24	5	9762.4	27348.4	24	10	14688.6	39498.4	24	46	6558.96	34625.4	24	1	11110	33749	24	10	13169	31310.2	24	12	6631.75	26989.6	24	4	14099.2	28800.8	24	5	14196.8	37482.2	24
	25	10	11403.7	41903.6	25	15	11711.7	38781.2	25	9	14997.4	39908.3	25	14	14829.9	28955.6	25	18	6564.78	25853.5	25	11	18319	40821.6	25	10	8365.5	30306.7	25	12	11581	35772.1	25	8	15299.4	38987.8	25	6	7202	29539.3	25	6	14109	30045.5	25	6	21691.3	41770	25
	26	9	11922.8	43001	26	7	24087.9	38581.7	26	6	18054.2	44931.3	26	9	21286	34062.8	26	13	6767.46	25938.5	26	6	18775.5	49285.8	26	2	6512.5	30705.5	26	7	7482.71	28678.1	26	1	12398	35429	26	6	10405.8	31361.2	26	7	14867.9	36268.6	26	8	9032.12	33450.4	26
	27	9	13635.4	42495.8	27	15	18568.7	41893.2	27	4	17660.5	44371.2	27	10	19917.9	29758.9	27	5	5955	30010.8	27	9	14385.6	44876.9	27	7	11386	35526.9	27	6	10661	31229	27	3	12270.3	34131.3	27	5	4310.2	35789.8	27	13	9875.31	35091.8	27	20	10221.9	32180.5	27
	28	6	11476.2	50432.8	28	11	12523.5	36834.8	28	13	16046.6	47338.3	28	10	19019.1	34003.5	28	7	6775	24806	28	16	14630.7	34820.3	28	10	5996	36416.9	28	9	11706	35874.1	28	19	12364.2	33815.1	28	4	8132.75	34872.5	28	10	11735.5	31656.8	28	26	10331.1	33885	28
	29	17	10545.3	44945.4	29	23	13482.4	34649.4	29	12	16849.8	42333.8	29	11	14510.7	34691.8	29	9	8066.44	23611.4	29	7	13355.6	42518.7	29	3	5892	36601	29	15	7865.6	26896.2	29	11	12863.1	34904.3	29	7	7552.57	26463.7	29	6	10228.5	27783.3	29	5	9232.8	38058.6	29
	30	9	12647.6	44406.3	30	14	17904.1	39314.7	30	16	19228.5	45702.2	30	9	19643	38036.1	30	13	5767.77	27247.2	30	9	16051.7	38183.8	30	9	11255	32704.6	30	7	9430.57	25996.3	30	8	13577.6	35675.9	30	3	5870	28558.7	30	9	10092.1	32055.8	30	8	9122.5	36343.1	30
	31	2	14396.5	51004.5	31	6	13523.5	41642.3	31	10	18127.5	40297.5	31	9	14498	27286.9	31	7	6238.71	27468.9	31	8	15623.1	42720.1	31	9	11872.6	36182.7	31	5	10479.8	30675	31	4	10427.2	36733	31	7	7026.43	32822.7	31	8	13423.5	34980	31	8	11697.1	31572.4	31
	32	7	15552.3	47812.9	32	11	14304.2	40907.5	32	6	15399	48225.2	32	13	20580.2	42738.3	32	9	8225	28205.8	32	5	15428.4	40280	32	27	9206.67	32267.6	32	5	9690	32122.8	32	10	17875.5	41045	32	14	5757.36	33009.4	32	7	12244.1	34245.9	32	6	11473	37021.7	32
	33	7	11521	42095.4	33	7	12470.7	40584.7	33	16	17204.6	43753.6	33	1	14189	26488	33	6	7338.5	24813.8	33	3	12332.7	42284.7	33	14	6868.21	34236.3	33	6	9843.33	34333.2	33	12	11266.8	30225.6	33	8	6065.38	30487.6	33	5	8686.8	33348.6	33	19	9726.58	35866.2	33
	34	6	11525.8	46649.2	34	9	18250.7	45722.2	34	0	NaN	NaN	34	6	16148.7	29958.2	34	13	3964.38	27794.5	34	5	16181.2	44759.2	34	11	16124.2	37439.5	34	7	7261.57	28283.1	34	3	10436.3	42050.3	34	5	7979.2	32376.6	34	4	8438	27467.8	34	10	9369.7	37423.5	34
	35	7	8400.43	42117.9	35	3	14651.3	43997.7	35	8	21862.5	44607.9	35	6	17983.7	42347.2					35	9	17366.2	43451.1	35	6	13143.7	34815.5	35	1	7766	28150	35	4	12350	34205.8	35	6	7365.67	28344					35	4	12998	34623.8	35
					36	7	11775.6	39287.3	36	14	17143	42788.1	36	7	20077	34926.1					36	2	18736	38461.5	36	4	11515.2	41969.2	36	7	7843.57	32789.1					36	11	6121	31812.1					36	3	12212.3	32829.3
					37	5	18609.6	53864	37	9	23482.9	44380.7									37	12	19524.3	38402.8	37	7	12352.9	35047	37	6	8910.17	28004.2													37	6	13273	35407.5
					38	8	10559	38599.6	38	3	19830.3	46660.7									38	8	16328.5	36531	38	5	7425.6	34705.2	38	5	7436	28785.2
																					39	6	16089.8	41012.7	39	4	7519.5	35474	39	3	8597	28389.7
																					40	10	15051.6	36973.5	40	3	7811.33	37244.3	40	9	9092.11	29076.2
																					41	9	16241.1	44468.7					41	2	6367	27155
	Background correction		0	0			0	0			0	0			0	0			0	0			0	0			0	0			0	0			0	0			0	0			0	0			0	0
	1		9050.5	4991			8157.33	7257.64			14481.7	-2556.47			8549.65	5067.21			2544.9	4750.59			17343	1502.69			7993.02	6082.71			2069.4	-1389.4			9734.64	-5964.24			1414.3	-2906.72			2358.94	4092.75			4894.59	6974.97
	2		6173.5	5377.43			7220.57	6336.75			9947.02	556.005			16930.7	4510.34			2611.9	152.28			9600.09	-8080.36			6010.18	2973.04			3526.68	-3571.36			7050.32	-7684.79			1405.47	-3786.91			2468.96	4443.55			5266.21	5192.43
	3		6162.19	260.287			10341.2	6683.94			9618.6	1611.2			18650.6	2647.67			7844.1	6500.68			14802.8	-2716.11			6189.58	3535.74			3174.22	753.81			7457.9	-286			4792.22	-2997.18			6370.26	3838.81			7012.69	-1177.69
	4		5278.41	101.782			5283.9	4371.5			16989.6	2018.7			13035.8	-3567.54			3496.23	7881.21			13786.6	-1204.61			3367.56	8003.54			6734.52	-3947.11			6227.43	-4862.58			1995.25	-2022.64			4449.51	4668.89			6777.76	652.585
	5		7242.17	2346.6			7199.9	-845.944			10352	865.572			8650.5	-2713.96			1905.9	345.68			15046.6	1306.69			8686.33	145.754			4458.18	-5048.11			8294.57	-5994.5			6133.31	-1885.97			10364.5	4608.91			4957.34	-2016.57
	6		6622	2920.27			5422.3	7294.5			9488.02	1481.78			16394.3	8465.04			3953.97	7065.67			10350.7	-6225.95			8278.85	4648.87			4641.43	-3498.24			5776.25	-7717.39			6103.47	-1503.45			5541.65	3874.46			5234.63	-2020.15
	7		6874.59	-2240.4			5194.9	3308			10131	4136.13			6123.4	1103.51			4543.23	6437.44			12155	10.2576			5198.02	5452.87			3037.35	1966.67			5498.52	-4542.21			3748.72	-1242.93			8437.81	-3499.52			3881.09	1965.96
	8		9129.67	632.767			10491.7	3898			8292.74	2553.98			8450.65	-3157.83			1071.23	8289.21			7931.96	1768.34			6557.68	-4386.96			3445.33	381.687			6346.54	-4777.98			2990.81	-1846.81			12121	3166.44			4380.76	2000.97
	9		9675.21	1606.46			9705.76	6939.64			9258.54	759.086			12219.3	-3399.73			3960.3	2671.98			7452.61	392.694			7059.56	-3543.71			3331.68	-916.113			6524.13	-5055.92			2791.32	-1508.46			8646.09	-1751.78			6525.42	61.307
	10		6638.75	-1634.53			9800.04	3849.21			8160.35	1661.2			6787.74	273.892			2764.34	4961.88			7113.41	-95.1061			2857.18	753.04			4240.81	-1401.74			7361.35	-1601.95			2852.31	-506.722			8924.82	-1244.87			5083.09	-732.193
	11		10334.7	4467.6			6839.77	3436.83			9085.74	2310.34			8197.76	-416.874			4841.9	-637.245			13418	3997.44			2917.81	-781.71			6532.88	1226.49			4993.64	3377.05			3724.81	625.861			3357.37	1662.64			5146.59	1614.56
	12		8517.38	3329.66			12126.1	8018.67			9161.51	479.911			9558.17	-2009.71			3552.73	901.38			7186.41	1360.89			4707.18	3021.84			4309.13	-1474.33			8768.64	174.047			3264.47	-4408.31			4132.7	-2169.3			10065.8	2647.96
	13		1988	-1145.9			9695.07	3174.33			9526.39	3026.63			7995.65	-4240.41			3463.7	-859.42			9378.03	2804.27			6501.42	-1922.14			6328.14	-2255.79			5863.36	-1403.14			3512.2	-4149.94			5963.8	1774.32			8912.76	-1396.08
	14		6187.79	-2495.83			6697.9	2753.5			11482.1	3895.2			10794.5	1192.84			3191.73	5240.38			14308.3	6377.18			5863.74	-2851.96			2529.33	-1227.82			6198.35	-4124.02			4380.22	-1273.56			9408.3	1714.68			5789.37	5627.38
	15		6895.1	185.3			9788.9	4958.5			9963.98	-559.553			8427.07	-3827.16			1772.85	3598.62			9252.24	-1174.11			6543.68	1383.04			8223.97	2816.46			7315.73	1374.67			1921.1	1915.32			6188.87	-2176.21			4582.84	1537.06
	16		1848.5	-498.4			9750.9	3775.12			8664.1	798.197			5481.9	-2210.16			3771.73	-392.953			11587.4	2058.14			6667.02	3343.71			2484.18	-2822.61			5940.23	3747.83			4582.54	-835.618			6928.94	300.464			4356.24	-3219.27
	17		7315.67	-2897.15			15023.5	6755.23			10779.5	3336.48			5553.01	-2483.68			3077.1	33.4802			10264.4	-2987.77			4083.18	-875.268			4710.82	99.6874			5916.14	-4740.59			3932.22	-1616.43			4901.7	-6254.08			12043.6	8905.64
	18		8966.81	-226.631			19094.7	7668.1			7594.85	4303.7			11370.7	4222.44			2550.04	5436.17			17808.7	2876.39			6972.98	6610.44			4440.68	-1568.11			4939.37	5791.43			4369.07	-775.905			7818.7	-4845.63			5449.37	5437.24
	19		7561.28	-624.622			7421.63	3921.32			12673.6	2109.02			9648.27	-2328.79			1968.4	1804.68			8305.49	4905.14			5110.33	1025.9			4232.78	1051.19			7110.97	-1032.67			3853.76	501.98			7356.24	3180.54			6123.39	-110.193
	20		6246.32	-5799.85			6097.19	-777.75			9658.67	1775.13			9527.61	111.84			3549.9	773.991			8630.03	-2326.23			3888.18	2780.04			4204.68	380.887			7268.67	3415.93			3668.06	2618.94			5783.37	-1508.26			7968.53	674.585
	21		10441.6	-768.275			9941.27	7136.88			10895.2	5644.34			8107.33	2057.41			2033.57	7598.21			8337.12	464.894			6960.78	2688.24			7531.18	932.221			4638.57	6950.13			3451.85	4337.69			10097.4	-1478.51			6907.76	967.14
	22		5682.2	794.9			4965.23	-3274.83			8629.35	3117.95			13398.7	6251.51			3391.2	594.08			9376.81	3589.29			3929.68	2260.54			6787.83	2949.46			8069.07	894.166			2813.47	3691.29			10701.4	3184.22			6891.3	-1299.55
	23		10831.1	6196.31			5052.04	-539.571			10511.2	4268.31			12837.3	-1293.7			4569.76	757.88			13857.2	1512.35			3981.97	-2324.1			5655.13	-4205			8427.7	9950.7			5402.02	312.513			3902.44	-2375.85			3986.59	3400.49
	24		6574.63	2225.4			10741.4	4633.41			8385	-2338.65			15472.9	7148.06			5959.3	1262.28			9831.01	-535.706			3102.14	1599.43			7832.68	3272.89			9644.07	-1710.47			3484.22	196.278			9457.62	-2184.21			9744.89	3263.01
	25		6673.2	-1229.8			7208.63	4134.7			8242.54	-1496.47			10782.8	-4977.52			2761.68	-232.62			13461.4	787.53			4908.68	-2719.26			8303.68	5295.97			11774.4	5967.08			4054.47	2746.03			9467.37	-939.464			17239.4	7550.81
	26		7192.28	-132.4			19584.8	3935.21			11299.3	3526.53			17238.9	129.618			2964.36	-147.658			13917.9	9251.73			3055.68	-2320.46			4205.4	-1797.97			8873.07	2408.33			7258.31	4567.86			10226.2	5283.61			4580.21	-768.818
	27		8904.94	-637.622			14065.6	7246.7			10905.6	2966.45			15870.8	-4174.26			2151.9	3924.68			9527.96	4842.78			7929.18	2500.9			7383.68	752.887			8745.4	1110.67			1162.67	8996.49			5233.67	4106.88			5769.99	-2038.69
	28		6745.67	7299.43			8020.45	2188.32			9291.72	5933.5			14972	70.3399			2971.9	-1280.12			9773.09	-5213.79			2539.18	3390.94			8428.68	5398			8839.28	794.438			4985.22	8079.19			7093.87	671.836			5879.17	-334.155
	29		5814.79	1812.01			8979.33	2.8913			10094.9	929.03			10463.6	758.658			4263.34	-2474.68			8497.98	2484.61			2435.18	3575.04			4588.28	-3579.91			9338.16	1883.61			4405.04	-329.591			5586.87	-3201.63			4780.89	3839.41
	30		7917.06	1272.93			13401	4668.21			12473.6	4297.45			15595.9	4102.95			1964.67	1161.03			11194.1	-1850.33			7798.18	-321.405			6153.25	-4479.83			10052.7	2655.21			2722.47	1765.36			5450.48	1070.81			4670.59	2123.93
	31		9666	7871.1			9020.4	6995.83			11372.6	-1107.3			10450.9	-6646.27			2435.61	1382.74			10765.5	2686.02			8415.74	3156.71			7202.48	198.887			6902.32	3712.33			3878.9	6029.41			8781.87	3995.04			7245.21	-2646.82
	32		10821.8	4679.46			9801.08	6260.95			8644.1	6820.36			16533.1	8805.15			4421.9	2119.66			10570.8	245.894			5749.85	-758.368			6412.68	1646.69			14350.6	8024.33			2609.83	6216.05			7602.51	3260.89			7021.09	2802.47
	33		6790.5	-1037.97			7967.61	5938.21			10449.7	2348.76			10141.9	-7445.16			3535.4	-1272.29			7475.07	2250.56			3411.4	1210.33			6566.02	3857.05			7741.9	-2795.08			2917.85	3694.32			4045.17	2363.64			5274.67	1647.02
	34		6795.33	3515.77			13747.6	11075.7							12101.6	-3974.99			161.285	1708.42			11323.6	4725.09			12667.4	4413.59			3984.25	-2192.97			6911.4	9029.67			4831.67	5583.29			3796.37	-3517.21			4917.79	3204.31
	35		3669.93	-1015.54			10148.2	9351.17			15107.6	3203.07			13936.6	8414.01							12508.6	3417.01			9686.85	1789.54			4488.68	-2326.11			8825.07	1185.08			4218.14	1550.69							8546.09	404.557
	36						7272.47	4640.79			10388.1	1383.34			16029.9	992.983							13878.4	-1572.61			8058.43	8943.29			4566.25	2313.03							2973.47	5018.79							7760.42	-1389.86
	37						14106.5	19217.5			16728	2975.86											14666.7	-1631.36			8896.04	2021.04			5632.85	-2471.95															8821.09	1188.31
	38						6055.9	3953.12			13075.4	5255.86											11470.9	-3503.11			3968.78	1679.24			4158.68	-1690.91
	39																						11232.2	978.561			4062.68	2448.04			5319.68	-2086.45
	40																						10194	-3060.61			4354.52	4218.37			5814.79	-1399.89
	41																						11383.5	4434.56							3089.68	-3321.11
	1		9050.5	4991			8157.33	7257.64			14481.7	0			8549.65	5067.21			2544.9	4750.59			17343	1502.69			7993.02	6082.71			2069.4	0			9734.64	0			1414.3	0			2358.94	4092.75			4894.59	6974.97
	2		6173.5	5377.43			7220.57	6336.75			9947.02	556.005			16930.7	4510.34			2611.9	152.28			9600.09	0			6010.18	2973.04			3526.68	0			7050.32	0			1405.47	0			2468.96	4443.55			5266.21	5192.43
	3		6162.19	260.287			10341.2	6683.94			9618.6	1611.2			18650.6	2647.67			7844.1	6500.68			14802.8	0			6189.58	3535.74			3174.22	753.81			7457.9	0			4792.22	0			6370.26	3838.81			7012.69	0
	4		5278.41	101.782			5283.9	4371.5			16989.6	2018.7			13035.8	0			3496.23	7881.21			13786.6	0			3367.56	8003.54			6734.52	0			6227.43	0			1995.25	0			4449.51	4668.89			6777.76	652.585
	5		7242.17	2346.6			7199.9	0			10352	865.572			8650.5	0			1905.9	345.68			15046.6	1306.69			8686.33	145.754			4458.18	0			8294.57	0			6133.31	0			10364.5	4608.91			4957.34	0
	6		6622	2920.27			5422.3	7294.5			9488.02	1481.78			16394.3	8465.04			3953.97	7065.67			10350.7	0			8278.85	4648.87			4641.43	0			5776.25	0			6103.47	0			5541.65	3874.46			5234.63	0
	7		6874.59	0			5194.9	3308			10131	4136.13			6123.4	1103.51			4543.23	6437.44			12155	10.2576			5198.02	5452.87			3037.35	1966.67			5498.52	0			3748.72	0			8437.81	0			3881.09	1965.96
	8		9129.67	632.767			10491.7	3898			8292.74	2553.98			8450.65	0			1071.23	8289.21			7931.96	1768.34			6557.68	0			3445.33	381.687			6346.54	0			2990.81	0			12121	3166.44			4380.76	2000.97
	9		9675.21	1606.46			9705.76	6939.64			9258.54	759.086			12219.3	0			3960.3	2671.98			7452.61	392.694			7059.56	0			3331.68	0			6524.13	0			2791.32	0			8646.09	0			6525.42	61.307
	10		6638.75	0			9800.04	3849.21			8160.35	1661.2			6787.74	273.892			2764.34	4961.88			7113.41	0			2857.18	753.04			4240.81	0			7361.35	0			2852.31	0			8924.82	0			5083.09	0
	11		10334.7	4467.6			6839.77	3436.83			9085.74	2310.34			8197.76	0			4841.9	0			13418	3997.44			2917.81	0			6532.88	1226.49			4993.64	3377.05			3724.81	625.861			3357.37	1662.64			5146.59	1614.56
	12		8517.38	3329.66			12126.1	8018.67			9161.51	479.911			9558.17	0			3552.73	901.38			7186.41	1360.89			4707.18	3021.84			4309.13	0			8768.64	174.047			3264.47	0			4132.7	0			10065.8	2647.96
	13		1988	0			9695.07	3174.33			9526.39	3026.63			7995.65	0			3463.7	0			9378.03	2804.27			6501.42	0			6328.14	0			5863.36	0			3512.2	0			5963.8	1774.32			8912.76	0
	14		6187.79	0			6697.9	2753.5			11482.1	3895.2			10794.5	1192.84			3191.73	5240.38			14308.3	6377.18			5863.74	0			2529.33	0			6198.35	0			4380.22	0			9408.3	1714.68			5789.37	5627.38
	15		6895.1	185.3			9788.9	4958.5			9963.98	0			8427.07	0			1772.85	3598.62			9252.24	0			6543.68	1383.04			8223.97	2816.46			7315.73	1374.67			1921.1	1915.32			6188.87	0			4582.84	1537.06
	16		1848.5	0			9750.9	3775.12			8664.1	798.197			5481.9	0			3771.73	0			11587.4	2058.14			6667.02	3343.71			2484.18	0			5940.23	3747.83			4582.54	0			6928.94	300.464			4356.24	0
	17		7315.67	0			15023.5	6755.23			10779.5	3336.48			5553.01	0			3077.1	33.4802			10264.4	0			4083.18	0			4710.82	99.6874			5916.14	0			3932.22	0			4901.7	0			12043.6	8905.64
	18		8966.81	0			19094.7	7668.1			7594.85	4303.7			11370.7	4222.44			2550.04	5436.17			17808.7	2876.39			6972.98	6610.44			4440.68	0			4939.37	5791.43			4369.07	0			7818.7	0			5449.37	5437.24
	19		7561.28	0			7421.63	3921.32			12673.6	2109.02			9648.27	0			1968.4	1804.68			8305.49	4905.14			5110.33	1025.9			4232.78	1051.19			7110.97	0			3853.76	501.98			7356.24	3180.54			6123.39	0
	20		6246.32	0			6097.19	0			9658.67	1775.13			9527.61	111.84			3549.9	773.991			8630.03	0			3888.18	2780.04			4204.68	380.887			7268.67	3415.93			3668.06	2618.94			5783.37	0			7968.53	674.585
	21		10441.6	0			9941.27	7136.88			10895.2	5644.34			8107.33	2057.41			2033.57	7598.21			8337.12	464.894			6960.78	2688.24			7531.18	932.221			4638.57	6950.13			3451.85	4337.69			10097.4	0			6907.76	967.14
	22		5682.2	794.9			4965.23	0			8629.35	3117.95			13398.7	6251.51			3391.2	594.08			9376.81	3589.29			3929.68	2260.54			6787.83	2949.46			8069.07	894.166			2813.47	3691.29			10701.4	3184.22			6891.3	0
	23		10831.1	6196.31			5052.04	0			10511.2	4268.31			12837.3	0			4569.76	757.88			13857.2	1512.35			3981.97	0			5655.13	0			8427.7	9950.7			5402.02	312.513			3902.44	0			3986.59	3400.49
	24		6574.63	2225.4			10741.4	4633.41			8385	0			15472.9	7148.06			5959.3	1262.28			9831.01	0			3102.14	1599.43			7832.68	3272.89			9644.07	0			3484.22	196.278			9457.62	0			9744.89	3263.01
	25		6673.2	0			7208.63	4134.7			8242.54	0			10782.8	0			2761.68	0			13461.4	787.53			4908.68	0			8303.68	5295.97			11774.4	5967.08			4054.47	2746.03			9467.37	0			17239.4	7550.81
	26		7192.28	0			19584.8	3935.21			11299.3	3526.53			17238.9	129.618			2964.36	0			13917.9	9251.73			3055.68	0			4205.4	0			8873.07	2408.33			7258.31	4567.86			10226.2	5283.61			4580.21	0
	27		8904.94	0			14065.6	7246.7			10905.6	2966.45			15870.8	0			2151.9	3924.68			9527.96	4842.78			7929.18	2500.9			7383.68	752.887			8745.4	1110.67			1162.67	8996.49			5233.67	4106.88			5769.99	0
	28		6745.67	7299.43			8020.45	2188.32			9291.72	5933.5			14972	70.3399			2971.9	0			9773.09	0			2539.18	3390.94			8428.68	5398			8839.28	794.438			4985.22	8079.19			7093.87	671.836			5879.17	0
	29		5814.79	1812.01			8979.33	2.8913			10094.9	929.03			10463.6	758.658			4263.34	0			8497.98	2484.61			2435.18	3575.04			4588.28	0			9338.16	1883.61			4405.04	0			5586.87	0			4780.89	3839.41
	30		7917.06	1272.93			13401	4668.21			12473.6	4297.45			15595.9	4102.95			1964.67	1161.03			11194.1	0			7798.18	0			6153.25	0			10052.7	2655.21			2722.47	1765.36			5450.48	1070.81			4670.59	2123.93
	31		9666	7871.1			9020.4	6995.83			11372.6	0			10450.9	0			2435.61	1382.74			10765.5	2686.02			8415.74	3156.71			7202.48	198.887			6902.32	3712.33			3878.9	6029.41			8781.87	3995.04			7245.21	0
	32		10821.8	4679.46			9801.08	6260.95			8644.1	6820.36			16533.1	8805.15			4421.9	2119.66			10570.8	245.894			5749.85	0			6412.68	1646.69			14350.6	8024.33			2609.83	6216.05			7602.51	3260.89			7021.09	2802.47
	33		6790.5	0			7967.61	5938.21			10449.7	2348.76			10141.9	0			3535.4	0			7475.07	2250.56			3411.4	1210.33			6566.02	3857.05			7741.9	0			2917.85	3694.32			4045.17	2363.64			5274.67	1647.02
	34		6795.33	3515.77			13747.6	11075.7							12101.6	0			161.285	1708.42			11323.6	4725.09			12667.4	4413.59			3984.25	0			6911.4	9029.67			4831.67	5583.29			3796.37	0			4917.79	3204.31
	35		3669.93	0			10148.2	9351.17			15107.6	3203.07			13936.6	8414.01							12508.6	3417.01			9686.85	1789.54			4488.68	0			8825.07	1185.08			4218.14	1550.69							8546.09	404.557
	36						7272.47	4640.79			10388.1	1383.34			16029.9	992.983							13878.4	0			8058.43	8943.29			4566.25	2313.03							2973.47	5018.79							7760.42	0
	37						14106.5	19217.5			16728	2975.86											14666.7	0			8896.04	2021.04			5632.85	0															8821.09	1188.31
	38						6055.9	3953.12			13075.4	5255.86											11470.9	0			3968.78	1679.24			4158.68	0
	39																						11232.2	978.561			4062.68	2448.04			5319.68	0
	40																						10194	0			4354.52	4218.37			5814.79	0
	41																						11383.5	4434.56							3089.68	0
	Average		7235.13	1768.18			9511.39	5152.12			10589.3	2441.87			11563.4	1842.37			3235.94	2569.24			11194.3	1732.46			5784.15	2391.39			5140.54	860.828			7649.16	2069.91			3683.48	1901.32			6851.96	1801.86			6607.82	1991.46
[truncated: 111 more columns]

## Sheet: (II) EGFPBLM BI2536
20231114	RPE1_STB+MG+BI_BLMmPICHCEN.czi
	MG-132_BI2536 (30 min)
	Image 01	Area	BLM	PICH	Image 02				Image 03				Image 04				Image 05				Image 06				Image 07				Image 08				Image 09				Image 10				Image 11				Image 12				Image 13
	Background	2448	7304.88	3935.34	Background	2907	4334.99	9238.39	Background	4937	4022.77	6078.95	Background	2017	3352.17	4585.59	Background	2782	4927.5	8929.79	Background	2207	5078.36	4626.9	Background	2464	4789.07	5818.83	Background	4584	15371.9	4563.65	Background	2542	7231.15	5921.53	Background	2485	4962.86	6124.91	Background	2398	3518	2888.06	Background	1586	5039.37	4506.63	Background
	1	2	7965	13062.5	1	4	4813.75	10906.2	1	7	4667	9601.57	1	6	3340.67	11119.3	1	15	5465.2	14987.7	1	8	5765	12719	1	7	5490.71	10258.3	1	3	16715.3	11547	1	8	8906.12	11198.6	1	9	5005.11	11550.6	1	6	3571	6999.17	1	3	6223.67	17464.3	1
	2	3	7417.33	14053.7	2	13	4910.62	19519	2	5	4609	9403	2	5	3401.8	11098.2	2	7	5256.57	15398.4	2	3	5314	17925.3	2	6	5692.67	16516.5	2	7	17290	8211.57	2	12	8788.33	13680.2	2	4	5889.5	21763	2	4	4622	8512.5	2	12	5377.67	8660.42	2
	3	3	8612.33	8767	3	8	4900.5	14244.6	3	13	4492.08	9547.92	3	8	3569.5	11166.2	3	14	5346.93	17643.2	3	5	5334.4	9428.6	3	11	4904.45	9591.09	3	10	17043.3	7331.1	3	7	8510.14	13248.4	3	8	4995.62	11877.6	3	7	3774.71	6215.29	3	3	5938	10033.3	3
	4	12	8594.08	6293.75	4	7	4876.57	15706.9	4	20	5042.35	9611.95	4	13	3338.92	10034.2	4	9	5333	17805.1	4	4	5123.75	13188	4	7	4959.14	15484	4	8	16484.5	7907.75	4	9	8806.22	12109.4	4	8	4952	14221.1	4	6	4178.67	8276.17	4	10	5726.1	9494.5	4
	5	6	7617	9389.33	5	12	4833	16589	5	6	4197.67	13844.7	5	7	4150.43	13625.6	5	13	5257.38	13100.6	5	4	5416.5	11708	5	6	6076.67	13178	5	12	16315.7	7295.33	5	8	7798.38	15533.9	5	10	4805.6	12996.3	5	6	4140.17	7123.67	5	8	5622.5	9738.62	5
	6	5	7853.4	13613.6	6	7	4666.14	23185.7	6	4	4498.25	12989.8	6	1	3350	9852	6	11	5023.73	16191.5	6	6	5540.33	11965.2	6	3	5943.33	15805.7	6	6	16815	13642	6	6	7964.83	16618.8	6	7	5329.14	12369	6	7	3595.29	7384.29	6	8	5584.62	10234.4	6
	7	8	7254.12	10720.6	7	6	4465.83	19904.2	7	10	4277.5	11180	7	4	3768.5	11956	7	19	5039.63	16269.2	7	7	5055.29	11641.7	7	8	5086.88	14701.4	7	10	16765.2	7139.4	7	13	7795.15	16639.8	7	6	5577.67	14736.7	7	8	4236.12	8478.12	7	7	6002	10527	7
	8	5	8494.6	12923.8	8	3	4722	18811.3	8	8	4971.88	9519.25	8	1	3531	11458	8	3	5072.33	16156	8	9	6118.89	16956.3	8	5	5525.8	14732	8	7	17005.6	8488.29	8	2	7833	12975.5	8	7	5215.29	10189.4	8	5	3687.2	6932.2	8	6	5802	10665.2	8
	9	3	8424.67	13613.3	9	17	4831.24	15732.6	9	5	4324.2	15803	9	4	4065.75	12794	9	8	5003.88	19574.9	9	7	6244.57	13801.4	9	6	5069.67	12639.3	9	3	17708.3	13421.7	9	10	7600.7	16116.2	9	4	6304.25	15090.5	9	1	3435	6820	9	14	5704.79	8512.07	9
	10	6	7557.33	12628.8	10	5	4863.4	19063	10	9	4418.33	15693.8	10	7	3306.86	13469.6	10	1	5500	18205	10	15	5730.87	17462.1	10	6	5508.33	14822	10	9	17352.8	7707.89	10	5	8078.8	16106.6	10	5	7319.6	16754	10	4	3494.75	6387.75	10	8	5669.38	9304.5	10
	11	6	7877.5	9223	11	8	4814	23006.6	11	14	4285.21	15790.4	11	15	3265.47	10654.2	11	24	5191.12	18494.8	11	7	5117	13869	11	8	5790	13488.9	11	7	13957.4	7772.71	11	6	8651.33	13092.2	11	6	5889.5	11359.7	11	9	4210.67	10562	11	8	6035.25	13739.6	11
	12	9	7871.89	8929.89	12	4	4630.5	22433	12	7	4178.57	11043.9	12	3	3581.33	9808.33	12	10	5001.9	16466.6	12	3	5643.67	12713.7	12	5	4992	13293.6	12	13	16246.6	10958.8	12	20	7321.4	15374.8	12	5	5621.2	15193.8	12	11	4662	8161.73	12	8	6008.38	11826	12
	13	3	8625.67	8016	13	11	4405.82	15782.5	13	1	5124	9507	13	2	3683.5	12074	13	33	z	15856.6	13	5	5707.6	12655.2	13	7	5706.29	14229.3	13	8	16965	9116.12	13	16	7778.19	12100.4	13	7	5599.71	15249	13	6	3426.33	6307.83	13	6	5888.67	12733.8	13
	14	6	7058	11760.8	14	10	4635.5	17583.7	14	6	4201.17	15490	14	2	3669	9002	14	19	5255.32	17852.6	14	7	5348.14	12536.6	14	8	5056.5	15363.1	14	13	15759.4	7844.31	14	6	8400.83	18618.5	14	7	4936	13668.3	14	6	4347.5	9380.17	14	5	5826.4	12710	14
	15	14	7282.86	11019.8	15	10	4744.1	24085.8	15	1	4339	8469	15	1	3666	8836	15	8	5133.38	14467.1	15	14	5273.93	11960.8	15	7	6685.29	12983.1	15	10	16395.7	8723.2	15	5	7238.6	16174.2	15	7	5459	12260.1	15	6	3964.5	8836.33	15	9	6126	12326.4	15
	16	10	7160.5	10377.3	16	8	4536	23558.8	16	20	4474.75	8541.25	16	8	3359.88	10471.2	16	14	5065.79	17754.6	16	5	5600.4	11859.8	16	9	6127	11349.9	16	8	15304.4	9962	16	9	7204.56	15449.4	16	23	5083.61	10538	16	6	4408	9331.17	16	6	6267.5	17459	16
	17	6	7343	9618.33	17	11	4657.36	18235.5	17	6	4792.83	9170	17	6	3376.67	10477.8	17	7	5367.29	16815.3	17	13	5457.62	9675.62	17	21	5939.86	15486.4	17	11	13297.4	6043	17	6	7526.67	18571.5	17	4	5269.5	13715	17	6	3939.83	8149	17	9	6150.89	11157.1	17
	18	7	10437.9	16015	18	2	4692.5	17935.5	18	4	4114	17241.8	18	4	4127	12992.5	18	13	5313.08	17150.6	18	4	5446.5	12836.8	18	8	5581.25	13477.9	18	10	15801.1	8168	18	9	7159.22	14727.9	18	4	5114	15243.8	18	8	3552	6864.5	18	7	5720.29	12341.4	18
	19	10	7453	14326.5	19	7	4440.14	16789	19	1	4504	8406	19	5	3799.8	8413.2	19	9	5119	25738.2	19	14	5204.57	12649.9	19	8	5549.62	13787.2	19	7	17602.7	12772.3	19	6	9309.17	18980.7	19	6	5167.5	12187.3	19	8	3858.5	8013.5	19	8	6017.25	11013.4	19
	20	6	9950.33	18976.2	20	8	4548.25	11124.8	20	7	3966.43	15290.1	20	2	3821.5	14172	20	6	5706.83	25948.5	20	6	5964.5	13105	20	5	7014.2	15256.8	20	4	15498.5	7740.5	20	13	7090.46	15089.6	20	13	4912.08	12990.5	20	7	3747.57	7197.43	20	28	6069.75	14273.6	20
	21	8	7752.88	15125.2	21	8	4759.88	23511.1	21	8	4064.75	16172.8	21	6	4309.33	11774.7	21	2	5027	17321	21	9	5159.89	12821.2	21	7	4983.43	11408.7	21	7	16735.6	14345.9	21	14	6831.71	12412.4	21	7	4955.29	11440.9	21	10	4156	7874.5	21	12	5753.25	10239.1	21
	22	7	8384	18984.9	22	4	4448.25	16581.5	22	9	4161.89	13481.4	22	1	4656	14190	22	3	5056.67	17327	22	9	5550.78	8177.44	22	9	5902.56	14551.8	22	14	15716	7907.79	22	11	7328.36	14184.7	22	10	4939.4	12662.6	22	10	4053.7	9309.9	22	10	5652.9	10698.8	22
	23	6	8514.33	7548.83	23	10	4831.4	25842.2	23	20	4254	16298	23	5	4014.4	14766	23	12	5311.58	26119.4	23	16	5361.25	10484.1	23	4	5172.25	14795.8	23	6	17225.5	10603.7	23	10	6716.3	14041.7	23	4	5496.5	13284.8	23	3	3596.33	9180.67	23	14	5713.43	11323.3	23
	24	7	7382.86	10340.4	24	11	4584.18	22229.3	24	6	4545.83	17283.2	24	4	4177.75	14339	24	14	5072.57	21550.7	24	6	5308	12852.5	24	8	5985.25	12262.5	24	9	16302.8	9103.89	24	12	6952.92	9246.08	24	4	5455.75	16044.5	24	6	3921	7190	24	2	5660	10411.5	24
	25	10	7779.7	9445.3	25	9	4382.67	19935.7	25	4	4388	16423.8	25	6	3505.67	10285.2	25	3	5253.67	21211	25	1	5315	12483	25	8	4940.5	13648.5	25	10	16600.9	11397.2	25	9	6985.89	18577.7	25	7	5110.86	13386.4	25	23	3593.61	9363.43	25	5	5974	14930.6	25
	26	4	8552.75	13979.2	26	13	4456.46	17274.1	26	6	4275.67	19038.2	26	8	3618.12	12118.5	26	13	5399.62	25280.1	26	6	5965.5	9712.17	26	7	5519.86	11194.1	26	6	16047.5	9499.17	26	8	7478.38	12838.8	26	5	5194.2	10327.8	26	2	4025	12169	26	8	6133.25	12573.2	26
	27	12	7666.25	10404	27	11	4487.18	12639.5	27	5	5220.8	23432.8	27	4	3681.5	8675.5	27	21	5355	21395.7	27	3	6058.33	11855.7	27	19	6216.47	8532.42	27	7	15756.3	7415	27	7	6824.29	13184.4	27	7	6225.71	14015.4	27	10	3875.6	9877.2	27	5	5999.8	9703.8	27
	28	12	7279.33	11046.9	28	1	4440	21088	28	5	4272.6	15021.2	28	6	3737.5	13939.3	28	10	5094.1	17569	28	8	5431.88	15109.8	28	13	6088.85	11153	28	10	16305.6	7421.3	28	9	6898.44	17094.6	28	2	5122	11843	28	7	3839	7814.14	28	9	5911.33	8956.33	28
	29	8	8240.75	11200	29	1	4887	25230	29	7	4399.14	21828.4	29	8	3706.38	15146.2	29	18	5244.56	19507.4	29	3	5098	13817.3	29	5	5452.2	17939.8	29	4	16386.5	9391.25	29	8	6924.88	14935.8	29	7	4949.43	13483.7	29	3	3788	7215	29	4	6511.25	12083.8	29
	30	8	7891.38	12520.9	30	12	4539.67	21833.2	30	6	4916.17	22585	30	9	3726	10539.7	30	1	6185	31575	30	4	5199.5	11236.5	30	8	5427	11439.5	30	5	19095	11983.6	30	12	7167.33	15157.5	30	16	5594.38	18012.8	30	9	3770.22	7064.67	30	4	6654.25	13429	30
	31	1	9029	6798	31	12	4579	16212.7	31	6	4305	10060.5	31	6	3762.67	9905.67	31	11	5947.91	32804.8	31	12	5217.25	11396.2	31	7	5638.43	17621.9	31	4	16944.2	9615.75	31	3	7312.33	15407.3	31	5	5726	12940.6	31	2	3552	6858	31	7	6353.71	11898.1	31
	32	6	9156	6953.17	32	9	4591.89	14058.6	32	7	4565.14	16861.3	32	6	3466.83	12035.7	32	3	5360.33	14045	32	6	4974.17	12835.5	32	3	4898	13822	32	7	16426	10307.3	32	11	7967.82	15422.6	32	8	5181.75	9431.25	32	2	3986.5	6212.5	32	13	6124.08	10270.2	32
	33	7	7619.71	14258.3	33	8	5421.88	28922.6	33	14	4298.71	19657.7	33	7	3639.14	11936.6	33	5	5275.8	16066.4	33	6	5713.33	16018.3	33	3	4979	10385.7	33	7	14527.4	5766	33	3	7139.33	16498.7	33	4	6002.25	9833.25					33	2	5832	10406.5	33
	34	6	8881.5	7233.33	34	4	4530	15826	34	5	4513.2	17369	34	2	3481.5	11789	34	40	5340.93	18809.1	34	7	5341.14	11832.7									34	6	8257.83	16356.8
	35	1	8226	13278	35	4	4691.5	17599.2	35	9	4435.22	20459.7	35	1	4005	10111	35	1	5235	18726	35	9	5212.33	14623.1
					36	5	4576.8	19802.4	36	4	4716	13972.2	36	9	4309.11	12987.6	36	12	5213.5	23065.3	36	3	6163.67	16327.7
					37	13	4736.69	25853	37	4	4519	14214	37	7	4224.71	10326	37	8	4809.12	17333	37	4	6272.5	16840.5
									38	5	4473.6	14476.6	38	7	4044.43	8432.29	38	19	5404.47	18995.3
									39	8	4585.38	15161.4					39	10	4876.7	20347.5
									40	7	4311	9208.71					40	6	5293.5	18834.8
																	41	9	5094.44	21904.2
	Background correction		0	0			0	0			0	0			0	0			0	0			0	0			0	0			0	0			0	0			0	0			0	0			0	0
	1		660.116	9127.16			478.76	1667.86			644.233	3522.62			-11.5054	6533.74			537.702	6057.95			686.64	8092.1			701.641	4439.46			1343.38	6983.35			1674.98	5277.1			42.2524	5425.65			53.0004	4111.11			1184.3	12957.7
	2		112.449	10118.3			575.625	10280.6			586.233	3324.05			49.628	6512.61			329.074	6468.64			235.64	13298.4			903.593	10697.7			1918.05	3647.92			1557.19	7758.64			926.641	15638.1			1104	5624.44			338.3	4153.79
	3		1307.45	4831.66			565.51	5006.24			469.31	3468.97			217.328	6580.66			419.431	8713.43			256.04	4801.7			115.381	3772.26			1671.35	2767.45			1279	7326.9			32.7662	5752.72			256.715	3327.23			898.633	5526.7
	4		1289.2	2358.41			541.581	6468.47			1019.58	3533			-13.249	5448.56			405.502	8875.32			45.3902	8561.1			170.069	9665.17			1112.55	3344.1			1575.08	6187.92			-10.8588	8096.22			660.667	5388.11			686.733	4987.87
	5		312.116	5454			498.01	7350.61			174.899	7765.72			798.257	9039.98			329.887	4170.83			338.14	7081.1			1287.59	7359.17			943.717	2731.68			567.23	9612.35			-157.259	6871.39			622.167	4235.61			583.133	5231.99
	6		548.516	9678.26			331.152	13947.3			475.483	6910.8			-2.17204	5266.41			96.2294	7261.67			461.974	7338.27			1154.26	9986.84			1443.05	9078.35			733.688	10697.3			366.284	6244.09			77.2861	4496.23			545.258	5727.74
	7		-50.7594	6785.29			130.843	10665.8			254.733	5101.05			416.328	7370.41			112.134	7339.42			-23.0741	7014.81			297.802	8882.54			1393.25	2575.75			564.009	10718.3			614.808	8611.76			718.125	5590.07			962.633	6020.37
	8		1189.72	8988.46			387.01	9572.95			949.108	3440.3			178.828	6872.41			144.835	7226.21			1040.53	12329.4			736.727	8913.17			1633.62	3924.63			601.855	7053.97			252.427	4064.52			169.2	4044.14			762.633	6158.54
	9		1119.78	9678			496.245	6494.26			301.433	9724.05			713.578	8208.41			76.3772	10645.1			1166.21	9174.53			280.593	6820.5			2336.38	8858.02			369.555	10194.7			1341.39	8965.59			-82.9996	3931.94			665.419	4005.44
	10		252.449	8693.5			528.41	9824.61			395.566	9614.83			-45.3149	8883.98			572.502	9275.21			652.507	12835.2			719.26	9003.17			1980.83	3144.24			847.655	10185.1			2356.74	10629.1			-23.2496	3499.69			630.008	4797.87
	11		572.616	5287.66			479.01	13768.2			262.447	9711.48			-86.7054	6068.61			263.627	9565.05			38.6402	9242.1			1000.93	7670.04			-1414.52	3209.06			1420.19	7170.64			926.641	5234.76			692.667	7673.94			995.883	9232.99
	12		567.004	4994.55			295.51	13194.6			155.804	4964.91			229.161	5222.74			74.4022	7536.81			565.307	8086.77			202.927	7474.77			874.666	6395.2			90.2548	9453.22			658.341	9068.89			1144	5273.67			969.008	7319.37
	13		1320.78	4080.66			70.8278	6544.16			1101.23	3428.05			331.328	7488.41				6926.79			629.24	8028.3			917.212	8410.46			1593.05	4552.47			547.042	6178.85			636.856	9124.09			-91.6662	3419.78			849.3	8227.2
	14		-246.884	7825.5			300.51	8345.31			178.399	9411.05			316.828	4416.41			327.818	8922.85			269.783	7909.67			267.427	9544.29			387.435	3280.66			1169.69	12697			-26.8588	7543.38			829.5	6492.11			787.033	8203.37
	15		-22.0273	7084.45			409.11	14847.4			316.233	2390.05			313.828	4250.41			205.877	5537.34			195.569	7333.88			1896.21	7164.31			1023.75	4159.55			7.45484	10252.7			496.141	6135.23			446.5	5948.28			1086.63	7819.81
	16		-144.384	6441.96			201.01	14320.4			451.983	2462.3			7.70296	5885.66			138.288	8824.86			522.04	7232.9			1337.93	5531.06			-67.5746	5398.35			-26.5896	9527.92			120.75	4413.09			890	6443.11			1228.13	12952.4
	17		38.1156	5683			322.373	8997.07			770.066	3091.05			24.4946	5892.24			439.788	7885.5			379.256	5048.71			1150.78	9667.55			-2074.59	1479.35			295.522	12650			306.641	7590.09			421.834	5260.94			1111.52	6650.48
	18		3132.97	12079.7			357.51	8697.11			91.2327	11162.8			774.828	8406.91			385.579	8220.83			368.14	8209.85			792.177	7659.04			429.15	3604.35			-71.9229	8806.36			151.141	9118.84			34.0004	3976.44			680.919	7834.8
	19		148.116	10391.2			105.152	7550.61			481.233	2327.05			447.628	3827.61			191.502	16808.4			126.212	8023.03			760.552	7968.42			2230.76	8208.63			2078.02	13059.1			204.641	6062.42			340.5	5125.44			977.883	6506.74
	20		2645.45	15040.8			213.26	1886.36			-56.3387	9211.19			469.328	9586.41			779.335	17018.7			886.14	8478.1			2225.13	9437.97			126.55	3176.85			-140.684	9168.09			-50.7818	6865.63			229.572	4309.37			1030.38	9767.01
	21		447.991	11189.9			424.885	14272.7			41.9827	10093.8			957.161	7189.07			99.5022	8391.21			81.5291	8194.32			194.355	5589.88			1363.62	9782.21			-399.431	6490.9			-7.57304	5315.95			638	4986.44			713.883	5732.45
	22		1079.12	15049.5			113.26	7343.11			139.122	7402.49			1303.83	9604.41			129.169	8397.21			472.418	3550.54			1113.48	8732.95			344.05	3344.13			97.2185	8263.2			-23.4588	6537.69			535.7	6421.84			613.533	6192.17
	23		1209.45	3613.5			496.41	16603.8			231.233	10219			662.228	10180.4			384.085	17189.6			282.89	5857.22			383.177	8976.92			1853.55	6040.02			-514.845	8120.17			533.641	7159.84			78.3338	6292.61			674.062	6816.66
	24		77.9727	6405.09			249.191	12990.9			523.066	11204.2			825.578	9753.41			145.074	12620.9			229.64	8225.6			1196.18	6443.67			930.828	4540.24			-278.228	3324.56			492.891	9919.59			403	4301.94			620.633	5904.87
	25		474.816	5509.96			47.6763	10697.3			365.233	10344.8			153.495	5699.57			326.169	12281.2			236.64	7856.1			151.427	7829.67			1228.95	6833.55			-245.256	12656.1			147.998	7261.52			75.6091	6475.38			934.633	10424
	26		1247.87	10043.9			121.471	8035.69			252.899	12959.2			265.953	7532.91			472.118	16350.3			887.14	5085.27			730.784	5375.31			675.55	4935.52			247.23	6917.22			231.341	4202.89			507	9280.94			1093.88	8066.62
	27		361.366	6468.66			152.191	3401.16			1198.03	17353.9			329.328	4089.91			427.502	12465.9			979.974	7228.77			1427.4	2713.59			384.336	2851.35			-406.859	7262.9			1262.86	7890.52			357.6	6989.14			960.433	5197.17
	28		-25.5511	7111.58			105.01	11849.6			249.833	8942.25			385.328	9353.74			166.602	8639.21			353.515	10482.8			1299.77	5334.17			933.65	2857.65			-332.701	11173			159.141	5718.09			321	4926.09			871.966	4449.7
	29		935.866	7264.66			552.01	15991.6			376.376	15749.5			354.203	10560.7			317.058	10577.7			19.6402	9190.43			663.127	12121			1014.55	4827.6			-306.27	9014.22			-13.4302	7358.8			270	4326.94			1471.88	7577.12
	30		586.491	8585.54			204.676	12594.8			893.399	16506.1			373.828	5954.07			1257.5	22645.2			121.14	6609.6			637.927	5620.67			3723.05	7419.95			-63.8118	9235.97			631.516	11887.8			252.223	4176.61			1614.88	8922.37
	31		1724.12	2862.66			244.01	6974.28			282.233	3981.55			410.495	5320.07			1020.41	23875			138.89	6769.27			849.355	11803			1572.3	5052.1			81.1882	9485.81			763.141	6815.69			34.0004	3969.94			1314.35	7391.51
	32		1851.12	3017.83			256.899	4820.17			542.376	10782.3			114.661	7450.07			432.835	5115.21			-104.193	8208.6			108.927	8003.17			1054.05	5743.63			736.673	9501.11			218.891	3306.34			468.5	3324.44			1084.71	5763.6
	33		314.83	10322.9			1086.88	19684.2			275.947	13578.8			286.971	7350.98			348.302	7136.61			634.974	11391.4			189.927	4566.84			-844.521	1202.35			-91.8118	10577.1			1039.39	3708.34							792.633	5899.87
	34		1576.62	3298			195.01	6587.61			490.433	11290.1			129.328	7203.41			413.427	9879.31			262.783	7205.81											1026.69	10435.3
	35		921.116	9342.66			356.51	8360.86			412.455	14380.7			652.828	5525.41			307.502	9796.21			133.974	9996.21
	36						241.81	10564			693.233	7893.3			956.939	8401.96			286.002	14135.5			1085.31	11700.8
	37						401.702	16614.6			496.233	8135.05			872.542	5740.41			-118.373	8403.21			1194.14	12213.6
	38										450.833	8397.65			692.257	3846.69			476.976	10065.5
	39										562.608	9082.43							-50.7978	11417.7
	40										288.233	3129.76							366.002	9905.05
	41										-4022.77	-6078.95							166.947	12974.4
	1		660.116	9127.16			478.76	1667.86			644.233	3522.62			0	6533.74			537.702	6057.95			686.64	8092.1			701.641	4439.46			1343.38	6983.35			1674.98	5277.1			42.2524	5425.65			53.0004	4111.11			1184.3	12957.7
	2		112.449	10118.3			575.625	10280.6			586.233	3324.05			49.628	6512.61			329.074	6468.64			235.64	13298.4			903.593	10697.7			1918.05	3647.92			1557.19	7758.64			926.641	15638.1			1104	5624.44			338.3	4153.79
	3		1307.45	4831.66			565.51	5006.24			469.31	3468.97			217.328	6580.66			419.431	8713.43			256.04	4801.7			115.381	3772.26			1671.35	2767.45			1279	7326.9			32.7662	5752.72			256.715	3327.23			898.633	5526.7
	4		1289.2	2358.41			541.581	6468.47			1019.58	3533			0	5448.56			405.502	8875.32			45.3902	8561.1			170.069	9665.17			1112.55	3344.1			1575.08	6187.92			0	8096.22			660.667	5388.11			686.733	4987.87
	5		312.116	5454			498.01	7350.61			174.899	7765.72			798.257	9039.98			329.887	4170.83			338.14	7081.1			1287.59	7359.17			943.717	2731.68			567.23	9612.35			0	6871.39			622.167	4235.61			583.133	5231.99
	6		548.516	9678.26			331.152	13947.3			475.483	6910.8			0	5266.41			96.2294	7261.67			461.974	7338.27			1154.26	9986.84			1443.05	9078.35			733.688	10697.3			366.284	6244.09			77.2861	4496.23			545.258	5727.74
	7		0	6785.29			130.843	10665.8			254.733	5101.05			416.328	7370.41			112.134	7339.42			0	7014.81			297.802	8882.54			1393.25	2575.75			564.009	10718.3			614.808	8611.76			718.125	5590.07			962.633	6020.37
	8		1189.72	8988.46			387.01	9572.95			949.108	3440.3			178.828	6872.41			144.835	7226.21			1040.53	12329.4			736.727	8913.17			1633.62	3924.63			601.855	7053.97			252.427	4064.52			169.2	4044.14			762.633	6158.54
	9		1119.78	9678			496.245	6494.26			301.433	9724.05			713.578	8208.41			76.3772	10645.1			1166.21	9174.53			280.593	6820.5			2336.38	8858.02			369.555	10194.7			1341.39	8965.59			0	3931.94			665.419	4005.44
	10		252.449	8693.5			528.41	9824.61			395.566	9614.83			0	8883.98			572.502	9275.21			652.507	12835.2			719.26	9003.17			1980.83	3144.24			847.655	10185.1			2356.74	10629.1			0	3499.69			630.008	4797.87
	11		572.616	5287.66			479.01	13768.2			262.447	9711.48			0	6068.61			263.627	9565.05			38.6402	9242.1			1000.93	7670.04			0	3209.06			1420.19	7170.64			926.641	5234.76			692.667	7673.94			995.883	9232.99
	12		567.004	4994.55			295.51	13194.6			155.804	4964.91			229.161	5222.74			74.4022	7536.81			565.307	8086.77			202.927	7474.77			874.666	6395.2			90.2548	9453.22			658.341	9068.89			1144	5273.67			969.008	7319.37
	13		1320.78	4080.66			70.8278	6544.16			1101.23	3428.05			331.328	7488.41				6926.79			629.24	8028.3			917.212	8410.46			1593.05	4552.47			547.042	6178.85			636.856	9124.09			0	3419.78			849.3	8227.2
	14		0	7825.5			300.51	8345.31			178.399	9411.05			316.828	4416.41			327.818	8922.85			269.783	7909.67			267.427	9544.29			387.435	3280.66			1169.69	12697			0	7543.38			829.5	6492.11			787.033	8203.37
	15		0	7084.45			409.11	14847.4			316.233	2390.05			313.828	4250.41			205.877	5537.34			195.569	7333.88			1896.21	7164.31			1023.75	4159.55			7.45484	10252.7			496.141	6135.23			446.5	5948.28			1086.63	7819.81
	16		0	6441.96			201.01	14320.4			451.983	2462.3			7.70296	5885.66			138.288	8824.86			522.04	7232.9			1337.93	5531.06			0	5398.35			0	9527.92			120.75	4413.09			890	6443.11			1228.13	12952.4
	17		38.1156	5683			322.373	8997.07			770.066	3091.05			24.4946	5892.24			439.788	7885.5			379.256	5048.71			1150.78	9667.55			0	1479.35			295.522	12650			306.641	7590.09			421.834	5260.94			1111.52	6650.48
	18		3132.97	12079.7			357.51	8697.11			91.2327	11162.8			774.828	8406.91			385.579	8220.83			368.14	8209.85			792.177	7659.04			429.15	3604.35			0	8806.36			151.141	9118.84			34.0004	3976.44			680.919	7834.8
	19		148.116	10391.2			105.152	7550.61			481.233	2327.05			447.628	3827.61			191.502	16808.4			126.212	8023.03			760.552	7968.42			2230.76	8208.63			2078.02	13059.1			204.641	6062.42			340.5	5125.44			977.883	6506.74
	20		2645.45	15040.8			213.26	1886.36			0	9211.19			469.328	9586.41			779.335	17018.7			886.14	8478.1			2225.13	9437.97			126.55	3176.85			0	9168.09			0	6865.63			229.572	4309.37			1030.38	9767.01
	21		447.991	11189.9			424.885	14272.7			41.9827	10093.8			957.161	7189.07			99.5022	8391.21			81.5291	8194.32			194.355	5589.88			1363.62	9782.21			0	6490.9			0	5315.95			638	4986.44			713.883	5732.45
	22		1079.12	15049.5			113.26	7343.11			139.122	7402.49			1303.83	9604.41			129.169	8397.21			472.418	3550.54			1113.48	8732.95			344.05	3344.13			97.2185	8263.2			0	6537.69			535.7	6421.84			613.533	6192.17
	23		1209.45	3613.5			496.41	16603.8			231.233	10219			662.228	10180.4			384.085	17189.6			282.89	5857.22			383.177	8976.92			1853.55	6040.02			0	8120.17			533.641	7159.84			78.3338	6292.61			674.062	6816.66
	24		77.9727	6405.09			249.191	12990.9			523.066	11204.2			825.578	9753.41			145.074	12620.9			229.64	8225.6			1196.18	6443.67			930.828	4540.24			0	3324.56			492.891	9919.59			403	4301.94			620.633	5904.87
	25		474.816	5509.96			47.6763	10697.3			365.233	10344.8			153.495	5699.57			326.169	12281.2			236.64	7856.1			151.427	7829.67			1228.95	6833.55			0	12656.1			147.998	7261.52			75.6091	6475.38			934.633	10424
	26		1247.87	10043.9			121.471	8035.69			252.899	12959.2			265.953	7532.91			472.118	16350.3			887.14	5085.27			730.784	5375.31			675.55	4935.52			247.23	6917.22			231.341	4202.89			507	9280.94			1093.88	8066.62
	27		361.366	6468.66			152.191	3401.16			1198.03	17353.9			329.328	4089.91			427.502	12465.9			979.974	7228.77			1427.4	2713.59			384.336	2851.35			0	7262.9			1262.86	7890.52			357.6	6989.14			960.433	5197.17
	28		0	7111.58			105.01	11849.6			249.833	8942.25			385.328	9353.74			166.602	8639.21			353.515	10482.8			1299.77	5334.17			933.65	2857.65			0	11173			159.141	5718.09			321	4926.09			871.966	4449.7
	29		935.866	7264.66			552.01	15991.6			376.376	15749.5			354.203	10560.7			317.058	10577.7			19.6402	9190.43			663.127	12121			1014.55	4827.6			0	9014.22			0	7358.8			270	4326.94			1471.88	7577.12
	30		586.491	8585.54			204.676	12594.8			893.399	16506.1			373.828	5954.07			1257.5	22645.2			121.14	6609.6			637.927	5620.67			3723.05	7419.95			0	9235.97			631.516	11887.8			252.223	4176.61			1614.88	8922.37
	31		1724.12	2862.66			244.01	6974.28			282.233	3981.55			410.495	5320.07			1020.41	23875			138.89	6769.27			849.355	11803			1572.3	5052.1			81.1882	9485.81			763.141	6815.69			34.0004	3969.94			1314.35	7391.51
	32		1851.12	3017.83			256.899	4820.17			542.376	10782.3			114.661	7450.07			432.835	5115.21			0	8208.6			108.927	8003.17			1054.05	5743.63			736.673	9501.11			218.891	3306.34			468.5	3324.44			1084.71	5763.6
	33		314.83	10322.9			1086.88	19684.2			275.947	13578.8			286.971	7350.98			348.302	7136.61			634.974	11391.4			189.927	4566.84			0	1202.35			0	10577.1			1039.39	3708.34			0	0			792.633	5899.87
	34		1576.62	3298			195.01	6587.61			490.433	11290.1			129.328	7203.41			413.427	9879.31			262.783	7205.81											1026.69	10435.3
	35		921.116	9342.66			356.51	8360.86			412.455	14380.7			652.828	5525.41			307.502	9796.21			133.974	9996.21
	36						241.81	10564			693.233	7893.3			956.939	8401.96			286.002	14135.5			1085.31	11700.8
	37						401.702	16614.6			496.233	8135.05			872.542	5740.41			0	8403.21			1194.14	12213.6
	38										450.833	8397.65			692.257	3846.69			476.976	10065.5
	39										562.608	9082.43							0	11417.7
	40										288.233	3129.76							366.002	9905.05
	41																		166.947	12974.4
	Average		800.731	7563.11			338.838	9913.96			446.124	8149.8			395.159	6908.41			334.327	10379.1			431.838	8321.25			783.758	7672.08			1136.97	4725.76			516.688	9012.76			451.978	7228.44			382.749	4958.91			901.068	7043.04
[truncated: 67 more columns]

## Sheet: (II) EGFPBLM BI PP1 1µM
20231114	RPE1_STB+MG+PP1 1µM+BI_BLMmPICHCEN.czi
	MG-132_PP1i 1µM (20min) + BI2536 (30 min)
	Image 01	Area	BLM	PICH	Image 02				Image 03				Image 04				Image 05				Image 06				Image 07				Image 08				Image 09				Image 10				Image 11				Image 12				Image 13
	Background	6540	4811.43	4503.55	Background	3383	8493.64	6775.4	Background	2719	8420.06	9267.1	Background	2147	9351.12	7830.74	Background	2715	7962.22	4975.32	Background	2137	7970.66	8328.97	Background	2679	6056.68	10687.8	Background	2141	7982.84	8256.1	Background	2141	8382.84	6656.1	Background	2141	7382.84	6756.1	Background	2778	5012.53	3605.66	Background	2284	3074.09	4081.21	Background
	1	7	2797.29	63315.3	1	4	7706	11517.5	1	15	8062.73	15241.9	1	7	9006.29	17150.3	1	15	8903.07	10333.3	1	5	7120	17519.8	1	4	7142	20798	1	6	7999	17216.3	1	6	7999	17216.3	1	6	7999	17216.3	2	4	5292.25	10961	1	5	3065.6	11042.8	1
	2	4	4803.25	9598.5	2	7	8095.29	13424.4	2	8	7946	22838.5	2	10	8794.9	15165.5	2	19	8529.05	11902.8	2	18	7672.94	17862.6	2	6	6416.5	18929.7	2	5	8421.6	19055.6	2	5	8421.6	19055.6	2	5	8421.6	19055.6	3	5	5200.4	8886.8	2	5	2967.4	9455.8	2
	3	3	4951	6788	3	7	8515.71	14289.1	3	12	7913.67	17052.1	3	8	8851.25	12733.5	3	6	8371.5	14465.8	3	8	7158.12	19102.9	3	7	6621.14	16325.9	3	3	7791.33	14874.7	3	3	7791.33	14874.7	3	3	7791.33	14874.7	4	7	5583.29	8679.86	3	5	2861.4	9589.2	3
	4	5	4837.6	11988.4	4	5	8837	15933	4	5	9011.2	17688.8	4	15	8966.47	15396.4	4	6	8744.5	14560.8	4	6	8195	19371.3	4	7	7009.43	21145.7	4	6	8582.83	23623.3	4	6	8582.83	23623.3	4	6	8582.83	23623.3	5	6	5242.33	7835.33	4	3	2927	10293.3	4
	5	3	4600.67	10664.3	5	10	7973.1	13201	5	6	9043.83	14068.7	5	7	9110.43	20831.6	5	8	7663.5	10942	5	6	6713.5	14479.5	5	6	6007.33	16286	5	5	7470.4	19301.2	5	5	7470.4	19301.2	5	5	7470.4	19301.2	6	8	5499.12	9144.5	5	8	2806.25	10494.4	5
	6	11	4202.73	9866.36	6	12	8505.42	12114.2	6	6	8873.17	17067.7	6	6	8072.5	22152.5	6	8	8080.75	16567.4	6	6	6694.67	16624.5	6	2	5970.5	13422	6	6	7284.33	17066.7	6	6	7284.33	17066.7	6	6	7284.33	17066.7	7	12	5421.33	9750.75	6	5	2903.6	9770.4	6
	7	3	4278.67	10256	7	7	8253.86	13574.4	7	7	8318.57	18334	7	7	9868.71	26558.7	7	9	8625.89	17183.4	7	13	7642.92	17320.5	7	7	6001.57	18258.6	7	8	8181.38	16892.1	7	8	8181.38	16892.1	7	8	8181.38	16892.1	8	7	5204.43	10564.3	7	6	2814.83	9783.83	7
	8	13	4341.31	11341.6	8	2	7041	20141.5	8	15	7715.2	16642.9	8	4	8951	16216	8	7	9144.14	14858.3	8	16	7586.81	17598.1	8	6	6289	20285.5	8	8	7232.25	18582	8	8	7232.25	18582	8	8	7232.25	18582	9	6	4909.5	10330.5	8	4	2972.25	11196	8
	9	6	4177	9831.83	9	7	8990.14	13455.7	9	5	8921.4	16643.6	9	10	8881.6	15702.5	9	15	8343.53	14593.1	9	7	8060.57	20100.4	9	11	6103.91	17153.8	9	6	7563.5	19147.7	9	6	7563.5	19147.7	9	6	7563.5	19147.7	10	1	5133	7821	9	9	3036.78	15068.4	9
	10	7	4305.71	12470.3	10	8	8223.88	16118.2	10	5	8310.8	17912.2	10	10	8137.3	15604.3	10	10	7870.9	13807.4	10	12	7393.83	18365.6	10	4	6536.5	19027.8	10	10	7602.5	16806.8	10	10	7602.5	16806.8	10	10	7602.5	16806.8	11	9	4560.56	9483.56	10	6	2970.33	10485.7	10
	11	4	4125.75	9744.25	11	13	8409	12774.8	11	13	8513.62	15088.5	11	12	8210.83	13873	11	7	8677.71	14083	11	5	6904.4	14306.8	11	8	7691	24402	11	8	7305.62	23073	11	8	7305.62	23073	11	8	7305.62	23073	12	23	5014.74	8276.91	11	5	2969.2	13293	11
	12	5	4135.2	8855.2	12	9	8706.89	13343.3	12	6	8140.83	16855.8	12	14	7870.79	16069.4	12	11	7909.36	14877.8	12	18	6849.39	16922.7	12	9	6478.22	15498.2	12	7	7732.14	16320.7	12	7	7732.14	16320.7	12	7	7732.14	16320.7	13	10	5216.8	10653.2	12	10	3113.6	11132.4	12
	13	5	4490.8	12491.4	13	4	8033	17948.2	13	8	7875.88	17982.6	13	7	8106.86	16138.1	13	7	7514.57	14446.6	13	19	7086.89	14760.4	13	6	6435.17	20661.8	13	4	7582.75	14721	13	4	7582.75	14721	13	4	7582.75	14721	14	4	5222.25	7380	13	3	3171	10660.3	13
	14	6	4443	12865	14	22	7745.91	14555	14	4	10124	21991	14	24	8055.38	14135.9	14	10	7704.6	13626.5	14	13	6745.92	15981.5	14	12	6433.33	17172.4	14	6	7864	23065.8	14	6	7864	23065.8	14	6	7864	23065.8	15	7	5283.71	9436.57	14	3	3012.33	11127	14
	15	4	4819.75	12084	15	7	7947.57	13041.6	15	29	7769.14	16207.1	15	7	8879.14	18061.1	15	5	8594	15250.2	15	7	6819	17058.3	15	6	9397.5	24873.7	15	20	7673	20389.2	15	20	7673	20389.2	15	20	7673	20389.2	16	7	4566.71	9539.71	15	7	2805.14	9925	15
	16	11	4613.09	10195	16	6	7916.5	26189.5	16	17	8165.47	19100.1	16	9	8290.67	14984.2	16	5	7920.6	12201.6	16	9	7098.22	15916	16	14	6518.5	22593.1	16	17	7582.18	19291.6	16	17	7582.18	19291.6	16	17	7582.18	19291.6	17	8	4754.25	10780.4	16	9	2986.78	9183.33	16
	17	5	4473	10129	17	6	8243	14724.8	17	5	9208.4	15045.4	17	8	8774.62	16391	17	9	8020.11	14008.6	17	11	6793.91	15838.2	17	10	6369	17808.9	17	3	8436	24549.3	17	3	8436	24549.3	17	3	8436	24549.3	18	8	4967.62	11737.5	17	7	3036	14533.1	17
	18	7	4288.57	8245.57	18	7	7870	16403.3	18	7	8681.71	18858.3	18	16	8422.69	18034.7	18	4	9302.75	16569.5	18	9	7080.22	18611	18	12	6712.08	16917.2	18	8	7777.88	21919.1	18	8	7777.88	21919.1	18	8	7777.88	21919.1	19	7	5150.86	9549.29	18	9	3123.89	11677.4	18
	19	3	4406.67	10844	19	8	8498.88	15288.4	19	8	7697.5	15525.4	19	5	8608.8	14386.4	19	4	10659.8	17598.2	19	10	6734.8	16585.2	19	10	6653.5	16870.1	19	6	7809.83	17897.7	19	6	7809.83	17897.7	19	6	7809.83	17897.7	20	4	5787.75	9750.75	19	4	3095.25	10819	19
	20	9	4164.11	9769.44	20	7	7888.57	16918.1	20	6	9238.17	16839.3	20	9	8458.67	12573.6	20	3	8534.67	12246.3	20	8	6606.38	16395.9	20	9	6814.56	21441.9	20	4	7554	18296	20	4	7554	18296	20	4	7554	18296	21	6	4989.33	9133.17	20	11	3128.45	8234	20
	21	6	5584.17	14432.8	21	10	8162.1	15529.9	21	22	7477.18	17580.7	21	8	8294.12	17646.8	21	6	8552.33	12743.7	21	16	6877.56	17535.1	21	7	6608.43	18564.9	21	6	7673	17845.2	21	6	7673	17845.2	21	6	7673	17845.2	22	9	4660.78	9824	21	14	2919.36	10345.5	21
	22	4	4302.25	11269.5	22	11	8173.36	12641.5	22	6	8960.33	20054.7	22	7	8310.86	16654	22	5	8367.8	14764.4	22	21	6950.14	23374.6	22	9	6310.56	18885.8	22	11	7702.09	15783.5	22	11	7702.09	15783.5	22	11	7702.09	15783.5	23	4	5277.25	9738	22	3	3016.67	11815.3	22
	23	0	4956	11774.4	23	7	8521.43	13672.3	23	8	8385.38	23618.6	23	6	8971.17	15411.7	23	3	7965.33	10670.3	23	10	6690	16894.9	23	13	6545.92	18143.2	23	7	7874.29	20920.6	23	7	7874.29	20920.6	23	7	7874.29	20920.6	24	8	6033.88	8698.25	23	2	3005	11313	23
	24	5	4555.67	12312.2	24	7	8047.14	14607.6	24	7	8891.71	11627.4	24	11	8530.82	17459.3	24	5	8270.4	14038.4	24	7	7371.71	21714.7	24	4	6903.75	17612	24	2	7472	21419.5	24	2	7472	21419.5	24	2	7472	21419.5	25	6	4916.33	9010.33	24	6	2755.5	10870.3	24
	25	6	4686.6	13627.4	25	8	8596.12	15482.9	25	15	8261.8	16140.9	25	5	8556	19136.6	25	7	8634.57	13405.9	25	6	7173	18004	25	13	7533.62	18422.7	25	5	8470.2	17076.6	25	5	8470.2	17076.6	25	5	8470.2	17076.6	26	4	4386	9091.25	25	4	2825	12819.2	25
	26	5	4461.2	10625.2	26	6	7478	14519.5	26	6	9013.33	21621.8	26	5	8662	14371.6	26	5	8065.4	14809.8	26	7	7478.57	19084.7	26	19	6669.47	14058.1	26	7	7775	17698	26	7	7775	17698	26	7	7775	17698	27	3	5036	8220	26	7	2932.14	11379	26
	27	5	5123.6	12560	27	7	8475.86	16929.9	27	6	8925.5	15611.5	27	4	9996.5	18501	27	6	8048.5	16760.2	27	14	6932.21	17143.6	27	3	6597	15278.3	27	3	8420.33	20322.7	27	3	8420.33	20322.7	27	3	8420.33	20322.7	29	2	4373	9269.5	27	5	2957.8	11625	27
	28	5	4989.14	12646.6	28	9	8415.78	18516	28	8	8767.25	23233.6	28	10	9352.2	14838	28	11	8105.55	12566.3	28	6	7200.67	18099.7	28	7	6657.86	20157.9	28	6	8185.17	20043	28	6	8185.17	20043	28	6	8185.17	20043	30	2	4921.5	9412	28	9	2899.44	10091.7	28
	29	7	4726	11945	29	11	8039.36	16921	29	18	7672.39	15574.1	29	7	8915.29	16110.1	29	4	8210.5	13217.8	29	10	7148.7	21726.1	29	7	6941.71	21077.3	29	10	7595	17972.4	29	10	7595	17972.4	29	10	7595	17972.4	31	5	6299.6	10053	29	4	2821.5	9352.5	29
	30	5	4833.43	8778	30	5	7558.6	14450.8	30	11	8726	18957.1	30	10	8841.1	15451	30	9	8335.67	11460.7	30	9	7329.56	14486.4	30	5	6756.6	15632.4	30	5	8586.6	19362.8	30	5	8586.6	19362.8	30	5	8586.6	19362.8	32	1	6733	9268	30	3	3001.33	12392.7	30
	31	7	4767.2	11489.4	31	5	8214.8	11977.4	31	10	8351.8	18848.7	31	10	9485.8	17229.8	31	5	9548	14923	31	6	7929.83	19580	31	7	7372	17304	31	5	8473.8	19878.4	31	5	8473.8	19878.4	31	5	8473.8	19878.4	33	4	5865.25	10072.2	31	4	3095.75	9034.75	31
	32	5	4948.5	10530.5	32	8	8358	13244.5	32	7	8433.71	17160.6	32	7	9243.86	12575.7	32	6	8126.17	9756.17	32	6	7591.83	20586	32	4	6967.5	16410.8	32	4	8187	20505.8	32	4	8187	20505.8	32	4	8187	20505.8					32	4	3195	12375	32
					33	8	7765	13892.8	33	7	8154	17314	33	6	9729.33	16560.7	33	3	7994	11097	33	6	7657.33	17550.2	33	4	8348.5	20421	33	1	8550	18631	33	1	8550	18631	33	1	8550	18631					33	0	NaN	NaN	33
					34	13	7683.23	14217.1	34	14	7778.71	11597.3	34	5	9828	14395.6									34	5	6740	15740.6
	Background correction		0	0			0	0			0	0			0	0			0	0			0	0			0	0			0	0			0	0			0	0			0	0			0	0
	1		-2014.15	58811.7			-787.645	4742.1			-357.324	5974.84			-344.835	9319.54			940.848	5357.95			-850.657	9190.83			1085.32	10110.2			16.1569	8960.23			-383.843	10560.2			616.157	10460.2			279.723	7355.34			-8.4937	6961.59
	2		-8.1841	5094.95			-398.359	6649.03			-474.057	13571.4			-556.221	7334.76			566.833	6927.52			-297.713	9533.64			359.822	8241.83			438.757	10799.5			38.7569	12399.5			1038.76	12299.5			187.873	5281.14			-106.694	5374.59
	3		139.566	2284.45			22.0696	7513.74			-506.39	7784.99			-499.871	4902.76			409.281	9490.51			-812.532	10773.9			564.465	5638.02			-191.51	6618.57			-591.51	8218.57			408.49	8118.57			570.759	5074.2			-212.694	5507.99
	4		26.1659	7484.85			343.355	9157.6			591.143	8421.7			-384.654	7565.66			782.281	9585.51			224.343	11042.4			952.751	10457.9			599.99	15367.2			199.99	16967.2			1199.99	16867.2			229.807	4229.67			-147.094	6212.12
	5		-210.767	6160.79			-520.545	6425.6			623.776	4801.57			-240.692	13000.8			-298.719	5966.68			-1257.16	6150.53			-49.3445	5598.16			-512.443	11045.1			-912.443	12645.1			87.5569	12545.1			486.598	5538.84			-267.844	6413.16
	6		-608.707	5362.82			11.772	5338.85			453.11	7800.57			-1278.62	14321.8			118.531	11592.1			-1275.99	8295.53			-86.1779	2734.16			-698.51	8810.57			-1098.51	10410.6			-98.5097	10310.6			408.807	6145.09			-170.494	5689.19
	7		-532.767	5752.45			-239.788	6799.03			-101.486	9066.9			517.594	18728			663.67	12208.1			-327.734	8991.49			-55.1064	7570.73			198.532	8636.02			-201.468	10236			798.532	10136			191.902	6958.62			-259.26	5702.62
	8		-470.126	6838.07			-1452.64	13366.1			-704.857	7375.77			-400.121	8385.26			1181.92	9882.96			-383.845	9269.15			232.322	9597.66			-750.593	10325.9			-1150.59	11925.9			-150.593	11825.9			-103.027	6724.84			-101.844	7114.79
	9		-634.434	5328.29			496.498	6680.31			501.343	7376.5			-469.521	7871.76			381.314	9617.81			89.914	11771.5			47.2312	6465.98			-419.343	10891.6			-819.343	12491.6			180.657	12391.6			120.473	4215.34			-37.3159	10987.2
	10		-505.72	7966.74			-269.77	9342.85			-109.257	8645.1			-1213.82	7773.56			-91.3192	8832.08			-576.824	10036.6			479.822	8339.91			-380.343	8550.7			-780.343	10150.7			219.657	10050.7			-451.971	5877.89			-103.76	6404.45
	11		-685.684	5240.7			-84.6447	5999.45			93.5584	5821.36			-1140.29	6042.26			715.495	9107.68			-1066.26	5977.83			1634.32	13714.2			-677.218	14816.9			-1077.22	16416.9			-77.2181	16316.9			2.21249	4671.25			-104.894	9211.79
	12		-676.234	4351.65			213.244	6567.93			-279.224	7588.74			-1480.33	8238.62			-52.8555	9902.5			-1121.27	8593.7			421.544	4810.39			-250.7	8064.61			-650.7	9664.61			349.3	9564.61			204.273	7047.54			39.5063	7051.19
	13		-320.634	7987.85			-460.645	11172.8			-544.182	8715.53			-1244.26	8307.4			-447.648	9471.25			-883.763	6431.4			378.489	9974			-400.093	6464.9			-800.093	8064.9			199.907	7964.9			209.723	3774.34			96.9063	6579.12
	14		-368.434	8361.45			-747.736	7779.64			1703.94	12723.9			-1295.75	6305.17			-257.619	8651.18			-1224.73	7652.49			376.655	6484.58			-118.843	14809.7			-518.843	16409.7			481.157	16309.7			271.188	5830.91			-61.7604	7045.79
	15		8.3159	7580.45			-546.073	6266.17			-650.919	6940.04			-471.978	10230.4			631.781	10274.9			-1151.66	8729.31			3340.82	14185.8			-309.843	12133.1			-709.843	13733.1			290.157	13633.1			-445.812	5934.05			-268.951	5843.79
	16		-198.343	5691.45			-577.145	19414.1			-254.586	9833.02			-1060.45	7153.48			-41.6192	7226.28			-872.435	7587.03			461.822	11905.3			-400.667	11035.5			-800.667	12635.5			199.333	12535.5			-258.277	7174.71			-87.3159	5102.12
	17		-338.434	5625.45			-250.645	7949.43			788.343	5778.3			-576.496	8560.26			57.892	9033.23			-1176.75	7509.21			312.322	7121.06			453.157	16293.2			53.1569	17893.2			1053.16	17793.2			-44.9016	8131.84			-38.0937	10451.9
	18		-522.863	3742.02			-623.645	9627.88			261.657	9591.19			-928.433	10203.9			1340.53	11594.2			-890.435	10282			655.405	6229.41			-204.968	13663			-604.968	15263			395.032	15163			138.331	5943.62			49.7952	7596.23
	19		-404.767	6340.45			5.23031	8512.97			-722.557	6258.28			-742.321	6555.66			2697.53	12622.9			-1235.86	8256.23			596.822	6182.26			-173.01	9641.57			-573.01	11241.6			426.99	11141.6			775.223	6145.09			21.1563	6737.79
	20		-647.323	5265.9			-605.073	10142.7			818.11	7572.24			-892.454	4742.81			572.448	7271.01			-1364.28	8066.9			757.878	10754.1			-428.843	10039.9			-828.843	11639.9			171.157	11539.9			-23.1933	5527.51			54.3609	4152.79
	21		772.733	9929.29			-331.545	8754.5			-942.875	8313.59			-1057	9816.01			590.114	7768.35			-1093.09	9206.15			551.751	7877.02			-309.843	9589.07			-709.843	11189.1			290.157	11089.1			-351.749	6218.34			-154.737	6264.29
	22		-509.184	6765.95			-320.281	5866.14			540.276	10787.6			-1040.26	8823.26			405.581	9789.08			-1020.51	15045.6			253.878	8197.94			-280.752	7527.44			-680.752	9127.44			319.248	9027.44			264.723	6132.34			-57.427	7734.12
	23		144.566	7270.85			27.7839	6896.88			-34.682	14351.5			-379.954	7580.92			3.11418	5695.01			-1280.66	8565.93			489.245	7455.39			-108.557	12664.5			-508.557	14264.5			491.443	14164.5			1021.35	5092.59			-69.0937	7231.79
	24		-255.767	7808.62			-446.502	7832.17			471.657	2360.33			-820.302	9628.53			308.181	9063.08			-598.943	13385.7			847.072	6924.16			-510.843	13163.4			-910.843	14763.4			89.1569	14663.4			-96.1933	5404.67			-318.594	6789.12
	25		-124.834	9123.85			102.48	8707.47			-158.257	6873.77			-795.121	11305.9			672.352	8430.54			-797.657	9675.03			1476.94	7734.86			487.357	8820.5			87.3569	10420.5			1087.36	10320.5			-626.527	5485.59			-249.094	8738.04
	26		-350.234	6121.65			-1015.64	7744.1			593.276	12354.7			-689.121	6540.86			103.181	9834.48			-492.086	10755.7			612.796	3370.22			-207.843	9441.9			-607.843	11041.9			392.157	10941.9			23.4734	4614.34			-141.951	7297.79
	27		312.166	8056.45			-17.7876	10154.5			505.443	6344.4			645.379	10670.3			86.2808	11784.8			-1038.44	8814.67			540.322	4590.5			437.49	12066.6			37.4903	13666.6			1037.49	13566.6			-639.527	5663.84			-116.294	7543.79
	28		177.709	8143.02			-77.8669	11740.6			347.193	13966.5			1.07937	7007.26			143.326	7590.95			-769.991	9770.7			601.179	9470.02			202.324	11786.9			-197.676	13386.9			802.324	13286.9			-91.0266	5806.34			-174.649	6010.45
	29		-85.4341	7441.45			-454.281	10145.6			-747.668	6306.96			-435.835	8279.4			248.281	8242.43			-821.957	13397.1			885.036	10389.4			-387.843	9716.3			-787.843	11316.3			212.157	11216.3			1287.07	6447.34			-252.594	5271.29
	30		21.9945	4274.45			-935.045	7675.4			305.943	9689.99			-510.021	7620.26			373.448	6485.35			-641.102	6157.47			699.922	4944.56			603.757	11106.7			203.757	12706.7			1203.76	12606.7			1720.47	5662.34			-72.7604	8311.45
	31		-44.2341	6985.85			-278.845	5202			-68.257	9581.6			134.679	9399.06			1585.78	9947.68			-40.8241	11251			1315.32	6616.16			490.957	11622.3			90.9569	13222.3			1090.96	13122.3			852.723	6466.59			21.6563	4953.54
	32		137.066	6026.95			-135.645	6469.1			13.6573	7893.47			-107.263	4744.97			163.948	4780.85			-378.824	12257			910.822	5722.91			204.157	12249.6			-195.843	13849.6			804.157	13749.6			-5012.53	-3605.66			120.906	8293.79
	33		-4811.43	-4503.55			-728.645	7117.35			-266.057	8046.9			378.213	8729.92			31.7808	6121.68			-313.324	9221.2			2291.82	9733.16			567.157	10374.9			167.157	11974.9			1167.16	11874.9			-5012.53	-3605.66			#VALUE!	#VALUE!
	34		-4811.43	-4503.55			-810.414	7441.68			-641.343	2330.19			476.879	6564.86			-7962.22	-4975.32			-7970.66	-8328.97			683.322	5052.76			-7982.84	-8256.1			-8382.84	-6656.1			-7382.84	-6756.1			-5012.53	-3605.66			-3074.09	-4081.21
	35		-4811.43	-4503.55			-8493.64	-6775.4			-8420.06	-9267.1			-9351.12	-7830.74			-7962.22	-4975.32			-7970.66	-8328.97			-6056.68	-10687.8			-7982.84	-8256.1			-8382.84	-6656.1			-7382.84	-6756.1			-5012.53	-3605.66			-3074.09	-4081.21
	36		-4811.43	-4503.55			-8493.64	-6775.4			-8420.06	-9267.1			-9351.12	-7830.74			-7962.22	-4975.32			-7970.66	-8328.97			-6056.68	-10687.8			-7982.84	-8256.1			-8382.84	-6656.1			-7382.84	-6756.1			-5012.53	-3605.66			-3074.09	-4081.21
	37		-4811.43	-4503.55			-8493.64	-6775.4			-8420.06	-9267.1			-9351.12	-7830.74			-7962.22	-4975.32			-7970.66	-8328.97			-6056.68	-10687.8			-7982.84	-8256.1			-8382.84	-6656.1			-7382.84	-6756.1			-5012.53	-3605.66			-3074.09	-4081.21
	38		-4811.43	-4503.55			-8493.64	-6775.4			-8420.06	-9267.1			-9351.12	-7830.74			-7962.22	-4975.32			-7970.66	-8328.97			-6056.68	-10687.8			-7982.84	-8256.1			-8382.84	-6656.1			-7382.84	-6756.1			-5012.53	-3605.66			-3074.09	-4081.21
	39		-4811.43	-4503.55			-8493.64	-6775.4			-8420.06	-9267.1			-9351.12	-7830.74			-7962.22	-4975.32			-7970.66	-8328.97			-6056.68	-10687.8			-7982.84	-8256.1			-8382.84	-6656.1			-7382.84	-6756.1			-5012.53	-3605.66			-3074.09	-4081.21
	40		-4811.43	-4503.55			-8493.64	-6775.4			-8420.06	-9267.1			-9351.12	-7830.74			-7962.22	-4975.32			-7970.66	-8328.97			-6056.68	-10687.8			-7982.84	-8256.1			-8382.84	-6656.1			-7382.84	-6756.1			-5012.53	-3605.66			-3074.09	-4081.21
	41		-4811.43	-4503.55			-8493.64	-6775.4			-8420.06	-9267.1			-9351.12	-7830.74			-7962.22	-4975.32			-7970.66	-8328.97			-6056.68	-10687.8			-7982.84	-8256.1			-8382.84	-6656.1			-7382.84	-6756.1			-5012.53	-3605.66			-3074.09	-4081.21
	1		0	58811.7			0	4742.1			0	5974.84			0	9319.54			940.848	5357.95			0	9190.83			1085.32	10110.2			16.1569	8960.23			0	10560.2			616.157	10460.2			279.723	7355.34			0	6961.59
	2		0	5094.95			0	6649.03			0	13571.4			0	7334.76			566.833	6927.52			0	9533.64			359.822	8241.83			438.757	10799.5			38.7569	12399.5			1038.76	12299.5			187.873	5281.14			0	5374.59
	3		139.566	2284.45			22.0696	7513.74			0	7784.99			0	4902.76			409.281	9490.51			0	10773.9			564.465	5638.02			0	6618.57			0	8218.57			408.49	8118.57			570.759	5074.2			0	5507.99
	4		26.1659	7484.85			343.355	9157.6			591.143	8421.7			0	7565.66			782.281	9585.51			224.343	11042.4			952.751	10457.9			599.99	15367.2			199.99	16967.2			1199.99	16867.2			229.807	4229.67			0	6212.12
	5		0	6160.79			0	6425.6			623.776	4801.57			0	13000.8			0	5966.68			0	6150.53			0	5598.16			0	11045.1			0	12645.1			87.5569	12545.1			486.598	5538.84			0	6413.16
	6		0	5362.82			11.772	5338.85			453.11	7800.57			0	14321.8			118.531	11592.1			0	8295.53			0	2734.16			0	8810.57			0	10410.6			0	10310.6			408.807	6145.09			0	5689.19
	7		0	5752.45			0	6799.03			0	9066.9			517.594	18728			663.67	12208.1			0	8991.49			0	7570.73			198.532	8636.02			0	10236			798.532	10136			191.902	6958.62			0	5702.62
	8		0	6838.07			0	13366.1			0	7375.77			0	8385.26			1181.92	9882.96			0	9269.15			232.322	9597.66			0	10325.9			0	11925.9			0	11825.9			0	6724.84			0	7114.79
	9		0	5328.29			496.498	6680.31			501.343	7376.5			0	7871.76			381.314	9617.81			89.914	11771.5			47.2312	6465.98			0	10891.6			0	12491.6			180.657	12391.6			120.473	4215.34			0	10987.2
	10		0	7966.74			0	9342.85			0	8645.1			0	7773.56			0	8832.08			0	10036.6			479.822	8339.91			0	8550.7			0	10150.7			219.657	10050.7			0	5877.89			0	6404.45
	11		0	5240.7			0	5999.45			93.5584	5821.36			0	6042.26			715.495	9107.68			0	5977.83			1634.32	13714.2			0	14816.9			0	16416.9			0	16316.9			2.21249	4671.25			0	9211.79
	12		0	4351.65			213.244	6567.93			0	7588.74			0	8238.62			0	9902.5			0	8593.7			421.544	4810.39			0	8064.61			0	9664.61			349.3	9564.61			204.273	7047.54			39.5063	7051.19
	13		0	7987.85			0	11172.8			0	8715.53			0	8307.4			0	9471.25			0	6431.4			378.489	9974			0	6464.9			0	8064.9			199.907	7964.9			209.723	3774.34			96.9063	6579.12
	14		0	8361.45			0	7779.64			1703.94	12723.9			0	6305.17			0	8651.18			0	7652.49			376.655	6484.58			0	14809.7			0	16409.7			481.157	16309.7			271.188	5830.91			0	7045.79
	15		8.3159	7580.45			0	6266.17			0	6940.04			0	10230.4			631.781	10274.9			0	8729.31			3340.82	14185.8			0	12133.1			0	13733.1			290.157	13633.1			0	5934.05			0	5843.79
	16		0	5691.45			0	19414.1			0	9833.02			0	7153.48			0	7226.28			0	7587.03			461.822	11905.3			0	11035.5			0	12635.5			199.333	12535.5			0	7174.71			0	5102.12
	17		0	5625.45			0	7949.43			788.343	5778.3			0	8560.26			57.892	9033.23			0	7509.21			312.322	7121.06			453.157	16293.2			53.1569	17893.2			1053.16	17793.2			0	8131.84			0	10451.9
	18		0	3742.02			0	9627.88			261.657	9591.19			0	10203.9			1340.53	11594.2			0	10282			655.405	6229.41			0	13663			0	15263			395.032	15163			138.331	5943.62			49.7952	7596.23
	19		0	6340.45			5.23031	8512.97			0	6258.28			0	6555.66			2697.53	12622.9			0	8256.23			596.822	6182.26			0	9641.57			0	11241.6			426.99	11141.6			775.223	6145.09			21.1563	6737.79
	20		0	5265.9			0	10142.7			818.11	7572.24			0	4742.81			572.448	7271.01			0	8066.9			757.878	10754.1			0	10039.9			0	11639.9			171.157	11539.9			0	5527.51			54.3609	4152.79
	21		772.733	9929.29			0	8754.5			0	8313.59			0	9816.01			590.114	7768.35			0	9206.15			551.751	7877.02			0	9589.07			0	11189.1			290.157	11089.1			0	6218.34			0	6264.29
	22		0	6765.95			0	5866.14			540.276	10787.6			0	8823.26			405.581	9789.08			0	15045.6			253.878	8197.94			0	7527.44			0	9127.44			319.248	9027.44			264.723	6132.34			0	7734.12
	23		144.566	7270.85			27.7839	6896.88			0	14351.5			0	7580.92			3.11418	5695.01			0	8565.93			489.245	7455.39			0	12664.5			0	14264.5			491.443	14164.5			1021.35	5092.59			0	7231.79
	24		0	7808.62			0	7832.17			471.657	2360.33			0	9628.53			308.181	9063.08			0	13385.7			847.072	6924.16			0	13163.4			0	14763.4			89.1569	14663.4			0	5404.67			0	6789.12
	25		0	9123.85			102.48	8707.47			0	6873.77			0	11305.9			672.352	8430.54			0	9675.03			1476.94	7734.86			487.357	8820.5			87.3569	10420.5			1087.36	10320.5			0	5485.59			0	8738.04
	26		0	6121.65			0	7744.1			593.276	12354.7			0	6540.86			103.181	9834.48			0	10755.7			612.796	3370.22			0	9441.9			0	11041.9			392.157	10941.9			23.4734	4614.34			0	7297.79
	27		312.166	8056.45			0	10154.5			505.443	6344.4			645.379	10670.3			86.2808	11784.8			0	8814.67			540.322	4590.5			437.49	12066.6			37.4903	13666.6			1037.49	13566.6			0	5663.84			0	7543.79
	28		177.709	8143.02			0	11740.6			347.193	13966.5			1.07937	7007.26			143.326	7590.95			0	9770.7			601.179	9470.02			202.324	11786.9			0	13386.9			802.324	13286.9			0	5806.34			0	6010.45
	29		0	7441.45			0	10145.6			0	6306.96			0	8279.4			248.281	8242.43			0	13397.1			885.036	10389.4			0	9716.3			0	11316.3			212.157	11216.3			1287.07	6447.34			0	5271.29
	30		21.9945	4274.45			0	7675.4			305.943	9689.99			0	7620.26			373.448	6485.35			0	6157.47			699.922	4944.56			603.757	11106.7			203.757	12706.7			1203.76	12606.7			1720.47	5662.34			0	8311.45
	31		0	6985.85			0	5202			0	9581.6			134.679	9399.06			1585.78	9947.68			0	11251			1315.32	6616.16			490.957	11622.3			90.9569	13222.3			1090.96	13122.3			852.723	6466.59			21.6563	4953.54
	32		137.066	6026.95			0	6469.1			13.6573	7893.47			0	4744.97			163.948	4780.85			0	12257			910.822	5722.91			204.157	12249.6			0	13849.6			804.157	13749.6							120.906	8293.79
	33						0	7117.35			0	8046.9			378.213	8729.92			31.7808	6121.68			0	9221.2			2291.82	9733.16			567.157	10374.9			167.157	11974.9			1167.16	11874.9
	34						0	7441.68			0	2330.19			476.879	6564.86											683.322	5052.76
	35
	36
	37
	38
	39
	40
	41
	Average		54.3838	8100.65			35.9539	8270.47			253.307	8260.1			63.3478	8595.74			478.052	8792.44			9.52292	9443.79			729.919	7770.43			142.418	10821.1			26.6249	12421.1			518.288	12321.1			298.281	5825.04			12.634	6893.11
[truncated: 47 more columns]

## Sheet: (II) EGFPBLM BI PP1 5µM
20231114	RPE1_STB+MG+PP1 5µM+BI_BLMmPICHCEN.czi
	MG-132_PP1i 5µM (20min) + BI2536 (30 min)
	Image 01	Area	BLM	PICH	Image 02				Image 03				Image 04				Image 05				Image 06				Image 07				Image 08				Image 09				Image 10				Image 11				Image 12				Image 13
	Background	2957	8477.4	5617.58	Background	2429	4282.26	4643.13	Background	2374	4266.95	4561.87	Background	3805	3469.63	2280.98	Background	2832	3959.41	4506.2	Background	2089	6356.53	3310.58	Background	2561	4978.71	4560.8	Background	1843	7422.09	5238.84	Background	2959	5909.54	7077.43	Background	2269	3719.97	4086.43	Background	3356	6402.68	4658.96	Background	3356	6002.68	5258.96	Background
	1	9	6880.56	9696.33	1	6	4166	13151.5	1	9	4386.22	12098.3	1	4	3706	7493.25	1	4	4249	10815.5	1	5	6225.4	7104	1	3	6135	13324.3	1	5	7108.4	12215.2	1	7	5970.71	16754.9	1	3	3483	9634.67	1	6	6542.5	10888.2	1	6	6542.5	10888.2	1
	2	9	7847.56	11272.2	2	6	4033.5	11226.5	2	5	5140.2	18226.6	2	4	3549	7311.5	2	8	4277.62	9366.38	2	10	5665.6	9092.7	2	4	5873	10377.5	2	6	6567.5	11408.7	2	9	6274.89	14605.1	2	5	2947.4	13784	2	5	6408.4	10958.4	2	5	6408.4	10958.4	2
	3	10	8595.6	10390.1	3	5	3661	13511.2	3	3	4238.33	18097.7	3	6	3795.5	6331.5	3	7	4029.43	10411	3	5	5535.8	8095	3	5	5399	11537.8	3	6	6965.5	13420.8	3	6	5831.83	15539.7	3	6	2898.17	9414	3	3	6323.33	12383.7	3	3	6323.33	12383.7	3
	4	4	8240	13723.5	4	6	3456.67	11165.8	4	7	4435.57	16810.9	4	3	3665	8253	4	8	3816.88	9543.5	4	4	6137.75	11337	4	8	5441.25	8673.5	4	7	6668.57	11590.6	4	6	5756.67	13129.5	4	5	3342	11546.6	4	4	5827.5	14505.2	4	4	5827.5	14505.2	4
	5	5	7916.8	12685.4	5	13	3536	12334.2	5	9	4268.11	14085.9	5	6	3468.5	7939.83	5	4	4292.25	12553	5	2	5651.5	7554.5	5	7	5307.43	11773.9	5	5	7900.4	12010.2	5	10	6187.3	15495.8	5	3	3092.67	8765	5	8	6707.62	11260.6	5	8	6707.62	11260.6	5
	6	6	7691	13712	6	8	3489.62	8921.25	6	9	4435.89	12869.9	6	7	3665	6824.43	6	5	3912.2	12930.2	6	3	5916.67	12552.3	6	5	5024	6933.4	6	11	6718.82	9475.09	6	7	5986.29	15056.4	6	5	3133.6	10533.8	6	6	5879.5	8913.33	6	6	5879.5	8913.33	6
	7	4	7551	12626	7	7	3979.14	8004.43	7	7	4187.71	16184.1	7	6	3793	7520.33	7	7	4277.14	13289	7	5	6015	10249.2	7	10	5952.3	23399.1	7	11	6533	9919.91	7	8	6050.25	13824.6	7	19	3180.26	7896.74	7	5	6109.8	11892.8	7	5	6109.8	11892.8	7
	8	13	7780.77	14151.6	8	7	3897.29	9742.14	8	7	4141	20980.4	8	4	3621.75	7337.5	8	2	3465.5	7432	8	9	6019.44	8485.33	8	6	5263.5	10756.7	8	8	7156.5	11858	8	8	5726.88	14275	8	14	3153.43	10025.1	8	4	6444	13172	8	4	6444	13172	8
	9	6	7414.83	13939.8	9	6	3436.17	9359.5	9	4	3808.25	14499.8	9	4	4344	8560	9	12	3599.33	9922.17	9	5	6378	11347	9	5	4839.6	9176.8	9	8	6919.12	10652.4	9	5	5442.8	14777.4	9	3	3696	11004.3	9	6	6368	11066.2	9	6	6368	11066.2	9
	10	12	7682.83	13748.4	10	7	3456.29	10284.6	10	10	3981.7	19301.4	10	6	4251	9492.33	10	14	3583.5	10134.9	10	6	6336.83	10117.3	10	6	5146.67	9023.33	10	4	6988.75	9889.75	10	5	5704	12110.8	10	4	3553.75	9671.75	10	8	6555.12	15781.2	10	8	6555.12	15781.2	10
	11	10	7321.8	12110.1	11	7	4965.71	14487.1	11	6	4127.67	11830.7	11	8	3522.75	6926.75	11	4	3976.75	10145.8	11	7	5480.86	7544.71	11	13	5381.46	11628.8	11	10	7050.7	9957.3	11	2	5769	14194	11	7	3617	9593.29	11	11	6282.45	9898.82	11	11	6282.45	9898.82	11
	12	6	8013.33	13480.8	12	8	3503.38	10670.9	12	7	3810.14	14782.9	12	2	4521.5	10543.5	12	3	4346.67	13302.7	12	3	6153	11813	12	9	5381.33	17172.2	12	5	6813.6	11819	12	10	5275.5	13506.9	12	4	3568	9537.75	12	10	6406	13253.9	12	10	6406	13253.9	12
	13	8	7382.88	10790.1	13	10	3836	10087.4	13	5	4297.4	16344.2	13	4	3843	8987	13	8	4442.25	13579	13	6	5181	7896	13	2	4917	8510	13	10	6641.7	9296.2	13	8	5561.75	13565.1	13	5	3477.6	13865	13	6	6488	11226.8	13	6	6488	11226.8	13
	14	6	7110.5	12754.3	14	5	4605.4	15544.2	14	8	4235	13715.5	14	4	3998.25	10175.5	14	3	3475.67	9773	14	5	5781.4	10954.2	14	9	4669.89	9909	14	6	7182.17	9409	14	8	6200.5	15679	14	6	3662.67	11206.8	14	12	6447.17	11620.7	14	12	6447.17	11620.7	14
	15	7	7401.57	13843.6	15	24	3621.29	9053.83	15	6	4390.17	14595.2	15	9	3594.33	7405.44	15	6	3581.33	15187	15	10	5201.5	7671.4	15	9	5193.22	9347.78	15	5	6878.6	10739.4	15	13	5549.08	15306.2	15	6	3650.5	10273.2	15	9	6128.11	12595.4	15	9	6128.11	12595.4	15
	16	6	7529.17	14202.7	16	6	3758.67	11396.3	16	6	3737.33	15393.8	16	4	4285	7754.25	16	8	3703.12	11691.4	16	7	6195.57	9506.14	16	12	4949.92	8787.83	16	11	6882.91	11491.3	16	20	5851.25	13953.6	16	9	3652.11	8734.78	16	6	6596.83	14426.8	16	6	6596.83	14426.8	16
	17	18	7692.67	14140.6	17	17	3723.24	9531.71	17	4	4004	14570	17	7	4632	9482.57	17	9	3607.89	13067.2	17	8	5710.38	8946.75	17	5	5385.8	10524	17	13	6947.23	11153.1	17	3	5640.33	19035	17	2	3724.5	12588	17	7	6550.57	13464.3	17	7	6550.57	13464.3	17
	18	12	7535.42	13415.4	18	7	3609.14	12360.1	18	6	3905.5	12975.2	18	8	4219.75	7528.12	18	7	3316.43	10806.7	18	8	5454.62	8054	18	9	5339.44	9440.67	18	7	7376	11491.3	18	4	6071.75	14947.8	18	4	3459	8074.25	18	11	6619.64	10949.2	18	11	6619.64	10949.2	18
	19	12	7814.42	14853.7	19	9	4009.44	10875.9	19	7	3928.29	14045.4	19	3	3765	7006	19	6	3656.33	10438	19	6	6073.83	8227.33	19	8	5029.25	10508.4	19	7	7367	14924	19	29	5842.38	12036.6	19	6	3661.67	11930.7	19	5	5771.8	16092.8	19	5	5771.8	16092.8	19
	20	4	7050.75	9775	20	11	3922	11327.7	20	10	3963.3	14398.1	20	5	4036.2	6868	20	1	3727	10922	20	6	5158.5	10220.5	20	6	5565.67	16831.5	20	6	7898.17	15160	20	8	5691.12	18017.5	20	4	3593.75	10141	20	10	6790.3	11838.9	20	10	6790.3	11838.9	20
	21	9	8192.11	14919.7	21	17	3876.94	9644.94	21	6	4413.5	22552.2	21	7	3497.43	9992.57	21	4	3485	11047.5	21	5	6019.6	8511.4	21	4	5257.25	15515	21	8	7894.88	10622.2	21	8	6255.5	15138.8	21	5	3884	13888.8	21	6	5700	18824.5	21	6	5700	18824.5	21
	22	13	8466.46	12652.4	22	6	3750	12820	22	4	3730.75	13722.2	22	5	4561.4	6890	22	5	3402.8	11370	22	1	4991	8610	22	6	5244.5	11639.7	22	8	7390.25	11548.2	22	7	5732	17322.6	22	7	3746	12647.3	22	17	6930.76	11755.2	22	17	6930.76	11755.2	22
	23	10	7237.7	10844.6	23	14	3861	10325.9	23	4	3960.25	16645.5	23	5	3557.8	9692.6	23	7	3256.29	11460	23	3	5747.33	9813.33	23	8	5126.25	12138.2	23	10	6585	11179.4	23	10	5940.9	12641.1	23	8	3783.25	11817.4	23	6	6381.67	12721.8	23	6	6381.67	12721.8	23
	24	22	8443.55	12580	24	4	4138	14369	24	5	4127.2	16082.2	24	4	3492.25	10034.5	24	9	3511.56	11715.4	24	7	5785.29	8251.86	24	6	5045.67	10064.8	24	5	7831.8	11047	24	8	5590.62	13084.5	24	6	3509.67	13224	24	8	6582.25	12585.2	24	8	6582.25	12585.2	24
	25	6	8827.17	14026.2	25	9	3561.67	15802.1	25	5	4217	20040.6	25	4	3963.75	7185.75	25	5	3234.8	8499.4	25	4	6516.25	8766.25	25	6	4887.33	11204.2	25	2	7282.5	11791.5	25	7	6286.14	19598.1	25	16	3303.5	9873.12	25	6	6052.17	12561	25	6	6052.17	12561	25
	26	9	8321.78	11160.4	26	4	3935.25	11684.8	26	10	4277.1	14510.5	26	2	4209.5	7349	26	6	3518.83	12261.3	26	6	5885.33	8960.67	26	6	4381.67	7431.17	26	7	6998.29	12737.7	26	5	6560	18699.6	26	6	3293.67	10522.3	26	6	6711	12931.2	26	6	6711	12931.2	26
	27	4	8368.25	18927.2	27	5	3995.8	11068.8	27	10	4094	15015.8	27	7	3503.14	8659.14	27	6	3435.5	10177.7	27	1	6760	9182	27	7	4923	9433.57	27	4	7579	13527.5	27	7	6172.71	14897.9	27	8	3345.62	15279.1	27	7	5797.29	10989.9	27	7	5797.29	10989.9	27
	28	10	8532.7	13049.6	28	5	3891	10549.2	28	5	4211.6	16489	28	6	3553.67	6945	28	4	3490	10216.2	28	13	5777.54	8722.85	28	3	4860	7680	28	8	7313.88	12232.4	28	8	5680.75	15242	28	6	3577.67	10344	28	4	6875.75	12299.2	28	4	6875.75	12299.2	28
	29	8	8150.12	10133.1	29	7	3805.29	11573	29	8	4233	14574.5	29	4	3515.5	13928.5	29	12	3164.33	11134.8	29	2	6234	9822.5	29	6	4914	10768.2	29	30	7005.9	10366.2	29	11	6396.36	13342.3	29	4	3452.75	7803	29	14	6251.5	11430.4	29	14	6251.5	11430.4	29
	30	7	8362.71	16448.7	30	7	4308.71	14338.6	30	24	4056.12	12718.2	30	6	3541.17	7707.83	30	5	3434.8	8624.4	30	6	5733.5	7935.5	30	3	4975.67	8855	30	8	7296	11496.6	30	5	5841	16277.2	30	4	3562.25	11252	30	9	6601.44	12444.7	30	9	6601.44	12444.7	30
	31	8	8312.38	9748.38	31	8	4188.88	12879.5	31	5	4199.8	18937.2	31	4	3575.75	8280.25	31	3	3352	9976.33	31	6	7291.5	11425.3	31	11	5186.09	14748.1	31	4	6732.5	10488.2	31	10	6558.3	17242.6	31	2	3338	10182.5	31	2	5602	16463	31	2	5602	16463	31
	32	8	8606.88	12826.2	32	6	3956.33	12259	32	4	4294	8254.25	32	7	3726	9304.57	32	4	3768	7637.75	32	7	6479	7843.14	32	4	5008.5	11317.5	32	2	7230.5	9747.5	32	10	5976.5	13324.7	32	7	3194.71	9363.57	32	1	6877	14437	32	1	6877	14437	32
	33	15	8344	7794.67	33	10	4155.4	12151.5	33	2	4268.5	13995	33	5	3732.4	9716.6	33	2	3813.5	9997	33	4	6551	12949.8					33	3	7444.33	13677.7	33	8	6636.88	13075.2	33	8	3324	10429.9	33	3	5785.33	10297.3	33	3	5785.33	10297.3
					34	8	4035.5	12252.2	34	3	4280.67	12606.3									34	2	6516.5	7578.5									34	3	6500.67	17351.7					34	2	5740	11067.5	34	2	5740	11067.5
					35	2	4136	11791.5
	Background correction		0	0			0	0			0	0			0	0			0	0			0	0			0	0			0	0			0	0			0	0			0	0			0	0
	1		-1596.84	4078.75			-116.261	8508.37			119.269	7536.47			236.37	5212.27			289.586	6309.3			-131.129	3793.42			1156.29	8763.53			-313.694	6976.36			61.1702	9677.42			-236.966	5548.24			139.819	6229.21			539.819	5629.21
	2		-629.841	5654.64			-248.761	6583.37			873.246	13664.7			79.3698	5030.52			318.211	4860.18			-690.929	5782.12			894.288	5816.7			-854.594	6169.83			365.345	7527.68			-772.566	9697.57			5.71883	6299.44			405.719	5699.44
	3		118.203	4772.52			-621.261	8868.07			-28.6203	13535.8			325.87	4050.52			70.0147	5904.8			-820.729	4784.42			420.288	6977			-456.594	8182			-77.7108	8462.23			-821.799	5327.57			-79.3478	7724.71			320.652	7124.71
	4		-237.397	8105.92			-825.594	6522.7			168.618	12249			195.37	5972.02			-142.539	5037.3			-218.779	8026.42			462.538	4112.7			-753.523	6351.74			-152.877	6052.07			-377.966	7460.17			-575.181	9846.29			-175.181	9246.29
	5		-560.597	7067.82			-746.261	7691.02			1.15745	9524.02			-1.13022	5658.85			332.836	8046.8			-705.029	4243.92			328.717	7213.05			478.306	6771.36			277.756	8418.37			-627.299	4678.57			304.944	6601.66			704.944	6001.66
	6		-786.397	8094.42			-792.636	4278.12			168.935	8308.02			195.37	4543.45			-47.2138	8424			-439.862	9241.76			45.2882	2372.6			-703.276	4236.25			76.7416	7978.99			-586.366	6447.37			-523.181	4254.37			-123.181	3654.37
	7		-926.397	7008.42			-303.118	3361.29			-79.2394	11622.3			323.37	5239.35			317.729	8782.8			-341.529	6938.62			973.588	18838.3			-889.094	4681.07			140.706	6747.19			-539.703	3810.31			-292.881	7233.84			107.119	6633.84
	8		-696.628	8534.04			-384.975	5099.01			-125.954	16418.6			152.12	5056.52			-493.914	2925.8			-337.085	5174.76			284.788	6195.86			-265.594	6619.16			-182.669	7197.57			-566.537	5938.72			41.3188	8513.04			441.319	7913.04
	9		-1062.56	8322.25			-846.094	4716.37			-458.704	9937.88			874.37	6279.02			-360.081	5415.97			21.471	8036.42			-139.112	4616			-502.969	5413.54			-466.744	7699.97			-23.9661	6917.91			-34.6812	6407.21			365.319	5807.21
	10		-794.564	8130.84			-825.975	5641.44			-285.254	14739.5			781.37	7211.35			-375.914	5628.73			-19.6956	6806.76			167.955	4462.53			-433.344	4650.91			-205.544	5033.37			-166.216	5585.32			152.444	11122.3			552.444	10522.3
	11		-1155.6	6492.52			683.454	9844.01			-139.287	7268.8			53.1198	4645.77			17.3362	5639.55			-875.672	4234.14			402.75	7067.97			-371.394	4718.46			-140.544	7116.57			-102.966	5506.86			-120.227	5239.86			279.773	4639.86
	12		-464.064	7863.25			-778.886	6027.74			-456.811	10221			1051.87	8262.52			387.253	8796.47			-203.529	8502.42			402.622	12611.4			-608.494	6580.16			-634.044	6429.47			-151.966	5451.32			3.31883	8594.94			403.319	7994.94
	13		-1094.52	5172.55			-446.261	5444.27			30.4463	11782.3			373.37	6706.02			482.836	9072.8			-1175.53	4585.42			-61.7118	3949.2			-780.394	4057.36			-347.794	6487.69			-242.366	9778.57			85.3188	6567.87			485.319	5967.87
	14		-1366.9	7136.75			323.139	10901.1			-31.9537	9153.63			528.62	7894.52			-483.747	5266.8			-575.129	7643.62			-308.823	5348.2			-239.928	4170.16			290.956	8601.57			-57.2994	7120.41			44.4855	6961.71			444.485	6361.71
	15		-1075.83	8225.99			-660.969	4410.7			123.213	10033.3			124.703	5124.47			-378.081	10680.8			-1155.03	4360.82			214.51	4786.97			-543.494	5500.56			-360.467	8228.8			-69.4661	6186.74			-274.57	7936.48			125.43	7336.48
	16		-948.23	8585.09			-523.594	6753.2			-529.62	10832			815.37	5473.27			-256.289	7185.18			-160.958	6195.57			-28.7952	4227.03			-539.185	6252.44			-58.2941	6876.17			-67.855	4648.35			194.152	9767.87			594.152	9167.87
	17		-784.73	8523.03			-559.025	4888.57			-262.954	10008.1			1162.37	7201.59			-351.525	8561.02			-646.154	5636.17			407.088	5963.2			-474.864	5914.24			-269.211	11957.6			4.53394	8501.57			147.89	8805.33			547.89	8205.33
	18		-941.98	7797.84			-673.118	7717.01			-361.454	8413.3			750.12	5247.15			-642.985	6300.52			-901.904	4743.42			360.733	4879.86			-46.0944	6252.45			162.206	7870.32			-260.966	3987.82			216.955	6290.22			616.955	5690.22
	19		-662.98	9236.09			-272.816	6232.76			-338.668	9483.56			295.37	4725.02			-303.081	5931.8			-282.696	4916.76			50.5382	5947.57			-55.0944	9685.16			-67.1648	4959.19			-58.2994	7844.24			-630.881	11433.8			-230.881	10833.8
	20		-1426.65	4157.42			-360.261	6684.59			-303.654	9836.23			566.57	4587.02			-232.414	6415.8			-1198.03	6909.92			586.955	12270.7			476.072	9921.16			-218.419	10940.1			-126.216	6054.57			387.619	7179.94			787.619	6579.94
	21		-285.286	9302.09			-405.319	5001.81			146.546	17990.3			27.7983	7711.59			-474.414	6541.3			-336.929	5200.82			278.538	10954.2			472.781	5383.41			345.956	8061.32			164.034	9802.37			-702.681	14165.5			-302.681	13565.5
	22		-10.9355	7034.8			-532.261	8176.87			-536.204	9160.38			1091.77	4609.02			-556.614	6863.8			-1365.53	5299.42			265.788	7078.86			-31.8444	6309.41			-177.544	10245.1			26.0339	8560.86			528.084	7096.22			928.084	6496.22
	23		-1239.7	5227.02			-421.261	5682.79			-306.704	12083.6			88.1698	7411.62			-703.128	6953.8			-609.196	6502.76			147.538	7577.45			-837.094	5940.56			31.3559	5563.67			63.2839	7730.95			-21.0145	8062.87			378.985	7462.87
	24		-33.8516	6962.37			-144.261	9725.87			-139.754	11520.3			22.6198	7753.52			-447.858	7209.25			-571.243	4941.28			66.9548	5504.03			409.706	5808.16			-318.919	6007.07			-210.299	9137.57			179.569	7926.29			579.569	7326.29
	25		349.77	8408.59			-720.594	11159			-49.9537	15478.7			494.12	4904.77			-724.614	3993.2			159.721	5455.67			-91.3785	6643.36			-139.594	6552.66			376.599	12520.7			-416.466	5786.7			-350.515	7902.04			49.4855	7302.04
	26		-155.619	5542.86			-347.011	7041.62			10.1463	9948.63			739.87	5068.02			-440.581	7755.14			-471.196	5650.09			-597.045	2870.36			-423.809	7498.88			650.456	11622.2			-426.299	6435.91			308.319	8272.21			708.319	7672.21
	27		-109.147	13309.7			-286.461	6425.67			-172.954	10453.9			33.5126	6378.16			-523.914	5671.47			403.471	5871.42			-55.7118	4872.77			156.906	8288.66			263.17	7820.42			-374.341	11192.7			-605.395	6330.9			-205.395	5730.9
	28		55.303	7432.02			-391.261	5906.07			-55.3537	11927.1			84.0364	4664.02			-469.414	5710.05			-578.99	5412.27			-118.712	3119.2			-108.219	6993.54			-228.794	8164.57			-142.299	6257.57			473.069	7640.29			873.069	7040.29
	29		-327.272	4515.55			-476.975	6929.87			-33.9537	10012.6			45.8698	11647.5			-795.081	6628.64			-122.529	6511.92			-64.7118	6207.36			-416.194	5127.4			486.82	6264.84			-267.216	3716.57			-151.181	6771.4			248.819	6171.4
	30		-114.683	10831.1			26.4537	9695.44			-210.829	8156.34			71.5364	5426.85			-524.614	4118.2			-623.029	4624.92			-3.04516	4294.2			-126.094	6257.79			-68.5441	9199.77			-157.716	7165.57			198.763	7785.71			598.763	7185.71
	31		-165.022	4130.8			-93.3856	8236.37			-67.1537	14375.3			106.12	5999.27			-607.414	5470.14			934.971	8114.76			207.379	10187.3			-689.594	5249.41			648.756	10165.2			-381.966	6096.07			-800.681	11804			-400.681	11204
	32		129.478	7208.67			-325.927	7615.87			27.0463	3692.38			256.37	7023.59			-191.414	3131.55			122.471	4532.57			29.7882	6756.7			-191.594	4508.66			66.9559	6247.27			-525.252	5277.15			474.319	9778.04			874.319	9178.04
	33		-133.397	2177.09			-126.861	7508.37			1.54634	9433.13			262.77	7435.62			-145.914	5490.8			194.471	9639.17							22.2389	8438.83			727.331	5997.82			-395.966	6343.45			-617.348	5638.37			-217.348	5038.37
	34						-246.761	7609.12			13.713	8044.47											159.971	4267.92											591.123	10274.2							-662.681	6408.54			-262.681	5808.54
	35						-146.261	7148.37
	36
	37
	38
	39
	40
	41
	1		0	4078.75			0	8508.37			119.269	7536.47			236.37	5212.27			289.586	6309.3			0	3793.42			1156.29	8763.53			0	6976.36			61.1702	9677.42			0	5548.24			139.819	6229.21			539.819	5629.21
	2		0	5654.64			0	6583.37			873.246	13664.7			79.3698	5030.52			318.211	4860.18			0	5782.12			894.288	5816.7			0	6169.83			365.345	7527.68			0	9697.57			5.71883	6299.44			405.719	5699.44
	3		118.203	4772.52			0	8868.07			0	13535.8			325.87	4050.52			70.0147	5904.8			0	4784.42			420.288	6977			0	8182			0	8462.23			0	5327.57			0	7724.71			320.652	7124.71
	4		0	8105.92			0	6522.7			168.618	12249			195.37	5972.02			0	5037.3			0	8026.42			462.538	4112.7			0	6351.74			0	6052.07			0	7460.17			0	9846.29			0	9246.29
	5		0	7067.82			0	7691.02			1.15745	9524.02			0	5658.85			332.836	8046.8			0	4243.92			328.717	7213.05			478.306	6771.36			277.756	8418.37			0	4678.57			304.944	6601.66			704.944	6001.66
	6		0	8094.42			0	4278.12			168.935	8308.02			195.37	4543.45			0	8424			0	9241.76			45.2882	2372.6			0	4236.25			76.7416	7978.99			0	6447.37			0	4254.37			0	3654.37
	7		0	7008.42			0	3361.29			0	11622.3			323.37	5239.35			317.729	8782.8			0	6938.62			973.588	18838.3			0	4681.07			140.706	6747.19			0	3810.31			0	7233.84			107.119	6633.84
	8		0	8534.04			0	5099.01			0	16418.6			152.12	5056.52			0	2925.8			0	5174.76			284.788	6195.86			0	6619.16			0	7197.57			0	5938.72			41.3188	8513.04			441.319	7913.04
	9		0	8322.25			0	4716.37			0	9937.88			874.37	6279.02			0	5415.97			21.471	8036.42			0	4616			0	5413.54			0	7699.97			0	6917.91			0	6407.21			365.319	5807.21
	10		0	8130.84			0	5641.44			0	14739.5			781.37	7211.35			0	5628.73			0	6806.76			167.955	4462.53			0	4650.91			0	5033.37			0	5585.32			152.444	11122.3			552.444	10522.3
	11		0	6492.52			683.454	9844.01			0	7268.8			53.1198	4645.77			17.3362	5639.55			0	4234.14			402.75	7067.97			0	4718.46			0	7116.57			0	5506.86			0	5239.86			279.773	4639.86
	12		0	7863.25			0	6027.74			0	10221			1051.87	8262.52			387.253	8796.47			0	8502.42			402.622	12611.4			0	6580.16			0	6429.47			0	5451.32			3.31883	8594.94			403.319	7994.94
	13		0	5172.55			0	5444.27			30.4463	11782.3			373.37	6706.02			482.836	9072.8			0	4585.42			0	3949.2			0	4057.36			0	6487.69			0	9778.57			85.3188	6567.87			485.319	5967.87
	14		0	7136.75			323.139	10901.1			0	9153.63			528.62	7894.52			0	5266.8			0	7643.62			0	5348.2			0	4170.16			290.956	8601.57			0	7120.41			44.4855	6961.71			444.485	6361.71
	15		0	8225.99			0	4410.7			123.213	10033.3			124.703	5124.47			0	10680.8			0	4360.82			214.51	4786.97			0	5500.56			0	8228.8			0	6186.74			0	7936.48			125.43	7336.48
	16		0	8585.09			0	6753.2			0	10832			815.37	5473.27			0	7185.18			0	6195.57			0	4227.03			0	6252.44			0	6876.17			0	4648.35			194.152	9767.87			594.152	9167.87
	17		0	8523.03			0	4888.57			0	10008.1			1162.37	7201.59			0	8561.02			0	5636.17			407.088	5963.2			0	5914.24			0	11957.6			4.53394	8501.57			147.89	8805.33			547.89	8205.33
	18		0	7797.84			0	7717.01			0	8413.3			750.12	5247.15			0	6300.52			0	4743.42			360.733	4879.86			0	6252.45			162.206	7870.32			0	3987.82			216.955	6290.22			616.955	5690.22
	19		0	9236.09			0	6232.76			0	9483.56			295.37	4725.02			0	5931.8			0	4916.76			50.5382	5947.57			0	9685.16			0	4959.19			0	7844.24			0	11433.8			0	10833.8
	20		0	4157.42			0	6684.59			0	9836.23			566.57	4587.02			0	6415.8			0	6909.92			586.955	12270.7			476.072	9921.16			0	10940.1			0	6054.57			387.619	7179.94			787.619	6579.94
	21		0	9302.09			0	5001.81			146.546	17990.3			27.7983	7711.59			0	6541.3			0	5200.82			278.538	10954.2			472.781	5383.41			345.956	8061.32			164.034	9802.37			0	14165.5			0	13565.5
	22		0	7034.8			0	8176.87			0	9160.38			1091.77	4609.02			0	6863.8			0	5299.42			265.788	7078.86			0	6309.41			0	10245.1			26.0339	8560.86			528.084	7096.22			928.084	6496.22
	23		0	5227.02			0	5682.79			0	12083.6			88.1698	7411.62			0	6953.8			0	6502.76			147.538	7577.45			0	5940.56			31.3559	5563.67			63.2839	7730.95			0	8062.87			378.985	7462.87
	24		0	6962.37			0	9725.87			0	11520.3			22.6198	7753.52			0	7209.25			0	4941.28			66.9548	5504.03			409.706	5808.16			0	6007.07			0	9137.57			179.569	7926.29			579.569	7326.29
	25		349.77	8408.59			0	11159			0	15478.7			494.12	4904.77			0	3993.2			159.721	5455.67			0	6643.36			0	6552.66			376.599	12520.7			0	5786.7			0	7902.04			49.4855	7302.04
	26		0	5542.86			0	7041.62			10.1463	9948.63			739.87	5068.02			0	7755.14			0	5650.09			0	2870.36			0	7498.88			650.456	11622.2			0	6435.91			308.319	8272.21			708.319	7672.21
	27		0	13309.7			0	6425.67			0	10453.9			33.5126	6378.16			0	5671.47			403.471	5871.42			0	4872.77			156.906	8288.66			263.17	7820.42			0	11192.7			0	6330.9			0	5730.9
	28		55.303	7432.02			0	5906.07			0	11927.1			84.0364	4664.02			0	5710.05			0	5412.27			0	3119.2			0	6993.54			0	8164.57			0	6257.57			473.069	7640.29			873.069	7040.29
	29		0	4515.55			0	6929.87			0	10012.6			45.8698	11647.5			0	6628.64			0	6511.92			0	6207.36			0	5127.4			486.82	6264.84			0	3716.57			0	6771.4			248.819	6171.4
	30		0	10831.1			26.4537	9695.44			0	8156.34			71.5364	5426.85			0	4118.2			0	4624.92			0	4294.2			0	6257.79			0	9199.77			0	7165.57			198.763	7785.71			598.763	7185.71
	31		0	4130.8			0	8236.37			0	14375.3			106.12	5999.27			0	5470.14			934.971	8114.76			207.379	10187.3			0	5249.41			648.756	10165.2			0	6096.07			0	11804			0	11204
	32		129.478	7208.67			0	7615.87			27.0463	3692.38			256.37	7023.59			0	3131.55			122.471	4532.57			29.7882	6756.7			0	4508.66			66.9559	6247.27			0	5277.15			474.319	9778.04			874.319	9178.04
	33		0	2177.09			0	7508.37			1.54634	9433.13			262.77	7435.62			0	5490.8			194.471	9639.17							22.2389	8438.83			727.331	5997.82			0	6343.45			0	5638.37			0	5038.37
	34		0	0			0	7609.12			13.713	8044.47											159.971	4267.92											591.123	10274.2							0	6408.54			0	5808.54
	35		0	0			0	7148.37
	36
	37
	38
	39
	40
	41
	Average		18.6501	6715.51			29.5156	6972.48			49.526	10789.6			369.989	6065.3			67.1455	6385.57			58.722	5958.29			254.841	6640.19			61.0912	6226.12			163.629	8012.25			7.81472	6666.54			114.297	7899.78			381.226	7299.78
[truncated: 19 more columns]
