# Supplementary material for: Centromere protection requires strict mitotic inactivation of the Bloom syndrome helicase complex
Source: Research Square preprint supplement (doi:10.21203/rs.3.rs-4420374/v1), 2024-05-30
Supplement: Supplementary file 31 [file Fig S1B. RPE1_PICHmClover East & West coordinate CENPA_PICHmClover.xlsx]

## Sheet: Fig S1B Coordinate measurements
CENPA-PICHmClover
			West Coordinates																				East Coordinates
																																												X and Y both *-1
CENPA			Image 2					Image 4					Image 10					Image 18					Image 2							Image 4							Image 10							Image 18
Rel X	Rel Y		Distance	Rel X	Rel Y	Units		Distance	Rel X	Rel Y	Units		Distance	Rel X	Rel Y	Units		Distance	Rel X	Rel Y			Distance	Rel X	Rel Y	Rel X (corrected)	Rel Y (corrected)	Units		Distance	Rel X	Rel Y	Rel X (corrected)	Rel Y (corrected)	Units		Distance	Rel X	Rel Y	Rel X (corrected)	Rel Y (corrected)	Units		Distance	Rel X	Rel Y	Rel X (corrected)	Rel Y (corrected)	Units
0	0	-0.0829	0.0829	0.08283	-0.003547	micron	-0.0787	0.0787	0.07599	-0.0205	micron	-0.09608	0.09608	0.08809	0.03835	micron	-0.08617	0.08617	0.08049	-0.03077		-0.006446	0.006446	0.006393	0.0008266	-0.006393	-0.0008266	micron	-0.05127	0.05127	0.04984	-0.012	-0.04984	0.012	micron	-0.08561	0.08561	0.06899	-0.05069	-0.06899	0.05069	micron	-0.08724	0.08724	0.08175	0.03046	-0.08175	-0.03046
		-0.1021	0.1021	0.07668	-0.06744	micron	-0.03154	0.03154	0.03055	-0.007861	micron	-0.07042	0.07042	0.06751	0.02003	micron	-0.09697	0.09697	0.09674	-0.006741		-0.1301	0.1301	0.1297	0.01052	-0.1297	-0.01052	micron	-0.1416	0.1416	0.07486	-0.1201	-0.07486	0.1201	micron	-0.06429	0.06429	0.03359	0.05481	-0.03359	-0.05481	micron	-0.09806	0.09806	0.0338	-0.09205	-0.0338	0.09205
		-0.06954	0.06954	0.05799	-0.03839	micron	-0.05455	0.05455	0.05455	9.2e-05	micron	-0.1439	0.1439	0.1438	-0.003497	micron	-0.1374	0.1374	0.1241	-0.05887		-0.1804	0.1804	0.128	0.1271	-0.128	-0.1271	micron	-0.07137	0.07137	0.07099	-0.007329	-0.07099	0.007329	micron	-0.06336	0.06336	0.06215	0.0123	-0.06215	-0.0123	micron	-0.09705	0.09705	0.09065	0.03466	-0.09065	-0.03466
		-0.09159	0.09159	0.0307	-0.08629	micron	-0.1295	0.1295	0.1178	0.05384	micron	-0.06661	0.06661	0.06238	0.02337	micron	-0.188	0.188	0.1701	-0.07254		-0.01108	0.01108	0.005759	0.009468	-0.005759	-0.009468	micron	-0.1269	0.1269	0.09067	-0.08879	-0.09067	0.08879	micron	-0.06351	0.06351	0.06192	-0.0141	-0.06192	0.0141	micron	-0.08497	0.08497	0.08159	0.0237	-0.08159	-0.0237
		-0.06687	0.06687	0.06624	0.009179	micron	-0.1501	0.1501	0.1467	0.03168	micron	-0.1234	0.1234	0.1092	-0.05752	micron	0.0693	0.0693	-0.02855	-0.06315		-0.08897	0.08897	0.07053	0.05424	-0.07053	-0.05424	micron	-0.02282	0.02282	0.02223	-0.005139	-0.02223	0.005139	micron	-0.223	0.223	0.1542	0.1611	-0.1542	-0.1611	micron	-0.08349	0.08349	0.07144	0.04322	-0.07144	-0.04322
		-0.01992	0.01992	0.01019	-0.01712	micron	-0.09434	0.09434	0.07352	0.05912	micron	-0.08743	0.08743	0.0665	0.05676	micron	-0.1017	0.1017	0.1009	0.01245		-0.07298	0.07298	0.06184	0.03876	-0.06184	-0.03876	micron	-0.06434	0.06434	0.06267	-0.01454	-0.06267	0.01454	micron	0.06087	0.06087	-0.01166	-0.05975	0.01166	0.05975	micron	-0.001719	0.001719	0.007832	-0.0153	-0.007832	0.0153
		-0.0663	0.0663	0.05987	-0.0285	micron	-0.1379	0.1379	0.1315	0.04153	micron	-0.08647	0.08647	0.08072	0.03101	micron	-0.14	0.14	0.09719	-0.1007		-0.05806	0.05806	0.05486	0.01902	-0.05486	-0.01902	micron	-0.1007	0.1007	0.06054	-0.08047	-0.06054	0.08047	micron	-0.04908	0.04908	0.04496	0.0197	-0.04496	-0.0197	micron	-0.0692	0.0692	0.05811	0.03756	-0.05811	-0.03756
		-0.1369	0.1369	0.07259	-0.1161	micron	-0.1224	0.1224	0.1212	-0.01715	micron	-0.08866	0.08866	0.06879	0.05593	micron	-0.1398	0.1398	0.06833	-0.1219		-0.07018	0.07018	0.06812	0.01688	-0.06812	-0.01688	micron	-0.05494	0.05494	0.03577	-0.04171	-0.03577	0.04171	micron	-0.05767	0.05767	0.01348	-0.05608	-0.01348	0.05608	micron	-0.1189	0.1189	0.05524	0.1053	-0.05524	-0.1053
		-0.06964	0.06964	0.06253	-0.03065	micron	-0.1356	0.1356	0.09661	0.09514	micron	-0.08326	0.08326	0.07655	0.03276	micron	-0.08892	0.08892	0.08718	0.01752		-0.06138	0.06138	0.01217	-0.06016	-0.01217	0.06016	micron	-0.08895	0.08895	0.07996	-0.03896	-0.07996	0.03896	micron	-0.07819	0.07819	0.03259	0.07108	-0.03259	-0.07108	micron	-0.07131	0.07131	0.04698	0.05364	-0.04698	-0.05364
		-0.1001	0.1001	0.089	-0.04586	micron	-0.07419	0.07419	0.06606	-0.03378	micron	-0.08343	0.08343	0.08343	0.0001237	micron	-0.1434	0.1434	0.139	-0.03511		0.01101	0.01101	-0.006451	0.008923	0.006451	-0.008923	micron	-0.07777	0.07777	0.07301	-0.02679	-0.07301	0.02679	micron	-0.05293	0.05293	0.01764	-0.04991	-0.01764	0.04991	micron	-0.004617	0.004617	0.00461	-0.0002398	-0.00461	0.0002398
		0.1248	0.1248	-0.001169	-0.1248	micron	-0.0951	0.0951	0.0715	0.0627	micron	-0.07158	0.07158	0.07145	0.004321	micron	-0.07185	0.07185	0.0578	-0.04268		-0.08809	0.08809	0.06014	0.06436	-0.06014	-0.06436	micron	0.01221	0.01221	-0.005853	-0.01072	0.005853	0.01072	micron	-0.009346	0.009346	0.009346	1.509e-05	-0.009346	-1.509e-05	micron	-0.06974	0.06974	0.007001	-0.06939	-0.007001	0.06939
		-0.1362	0.1362	0.02278	-0.1343	micron	-0.09763	0.09763	0.09444	0.02476	micron	-0.07979	0.07979	0.076	0.0243	micron	-0.07592	0.07592	0.0429	-0.06264		0.1262	0.1262	-0.0136	0.1255	0.0136	-0.1255	micron	-0.04698	0.04698	0.003219	-0.04687	-0.003219	0.04687	micron	-0.08294	0.08294	0.05758	-0.05969	-0.05758	0.05969	micron	-0.097	0.097	0.09663	0.008394	-0.09663	-0.008394
		-0.08424	0.08424	0.07359	-0.04101	micron	-0.09425	0.09425	0.07304	0.05957	micron	-0.1376	0.1376	0.1002	0.0944	micron	-0.09439	0.09439	0.09284	0.01704		0.0662	0.0662	-0.01872	0.0635	0.01872	-0.0635	micron	-0.05974	0.05974	0.02802	0.05276	-0.02802	-0.05276	micron	0.05652	0.05652	-0.0105	-0.05554	0.0105	0.05554	micron	-0.0678	0.0678	0.03349	0.05896	-0.03349	-0.05896
		-0.1647	0.1647	0.0759	-0.1462	micron	-0.05353	0.05353	0.05353	-0.000118	micron	-0.08642	0.08642	0.02278	0.08336	micron	-0.1321	0.1321	0.126	-0.03952		-0.05967	0.05967	0.04882	0.03431	-0.04882	-0.03431	micron	-0.05306	0.05306	0.04497	-0.02817	-0.04497	0.02817	micron	0.06356	0.06356	-0.02044	0.06018	0.02044	-0.06018	micron	-0.08838	0.08838	0.01298	-0.08742	-0.01298	0.08742
		-0.1494	0.1494	0.09071	-0.1187	micron	-0.08947	0.08947	0.07172	0.05348	micron	-0.133	0.133	0.09432	0.09379	micron	-0.1067	0.1067	0.08148	-0.06897		-0.009433	0.009433	0.001399	0.009328	-0.001399	-0.009328	micron	-0.06237	0.06237	0.06219	0.004749	-0.06219	-0.004749	micron	-0.05262	0.05262	0.03817	-0.03622	-0.03817	0.03622	micron	-0.0228	0.0228	0.02241	0.004176	-0.02241	-0.004176
		-0.1356	0.1356	0.08829	0.103	micron	-0.07261	0.07261	0.07	0.01931	micron	-0.07982	0.07982	0.07655	-0.02262	micron	-0.08278	0.08278	0.06904	-0.04567		-0.09361	0.09361	0.08764	0.0329	-0.08764	-0.0329	micron	-0.05509	0.05509	0.04545	-0.03113	-0.04545	0.03113	micron	0.05528	0.05528	-0.04504	0.03205	0.04504	-0.03205	micron	0.04795	0.04795	-0.03089	0.03668	0.03089	-0.03668
		-0.1283	0.1283	0.1235	-0.03461	micron	-0.1321	0.1321	0.09431	0.09255	micron	-0.08214	0.08214	0.08183	0.007159	micron	-0.08751	0.08751	0.08658	-0.01278		-0.08471	0.08471	0.08215	-0.02068	-0.08215	0.02068	micron	-0.07144	0.07144	0.04073	-0.05868	-0.04073	0.05868	micron	-0.07346	0.07346	0.05421	-0.04958	-0.05421	0.04958	micron	-0.1409	0.1409	0.1243	-0.06646	-0.1243	0.06646
		-0.1367	0.1367	0.05318	-0.126	micron	-0.19	0.19	0.09111	0.1667	micron											-0.1455	0.1455	0.03882	0.1403	-0.03882	-0.1403	micron	-0.0605	0.0605	0.05644	-0.02177	-0.05644	0.02177	micron
		-0.07518	0.07518	0.07503	0.004824	micron	-0.08865	0.08865	0.03368	0.082	micron											-0.06347	0.06347	0.06322	0.005533	-0.06322	-0.005533	micron	-0.05746	0.05746	0.01527	-0.0554	-0.01527	0.0554	micron
							-0.09195	0.09195	0.08276	-0.04009	micron																		0.0217	0.0217	-0.007887	-0.02022	0.007887	0.02022	micron
							-0.017	0.017	0.006996	0.01549	micron																		-0.01229	0.01229	0.01201	-0.002585	-0.01201	0.002585	micron
							-0.1016	0.1016	0.0752	0.06836	micron																		-0.01846	0.01846	0.009261	-0.01596	-0.009261	0.01596	micron

## Sheet: Distance measurements
CENPA-PICHmClover
																	DISTANCES ALONG CENTROMERIC x-AXIS (x values only)
	WEST Distance							EAST Distance							WEST Distance							EAST Distance
	Image 2	Image 4	Image 10					Image 2	Image 4	Image 10					Image 2	Image 4	Image 10					Image 2	Image 4	Image 10
	0.0829	0.0787	0.09608					0.006446	0.05127	0.08561					0.08283	0.07599	0.08809					0.006393	0.04984	0.06899
	0.1021	0.03154	0.07042					0.1301	0.1416	0.06429					0.07668	0.03055	0.06751					0.1297	0.07486	0.03359
	0.06954	0.05455	0.1439					0.1804	0.07137	0.06336					0.05799	0.05455	0.1438					0.128	0.07099	0.06215
	0.09159	0.1295	0.06661					0.01108	0.1269	0.06351					0.0307	0.1178	0.06238					0.005759	0.09067	0.06192
	0.06687	0.1501	0.1234					0.08897	0.02282	0.223					0.06624	0.1467	0.1092					0.07053	0.02223	0.1542
	0.01992	0.09434	0.08743					0.07298	0.06434	0.06087					0.01019	0.07352	0.0665					0.06184	0.06267	-0.01166
	0.0663	0.1379	0.08647					0.05806	0.1007	0.04908					0.05987	0.1315	0.08072					0.05486	0.06054	0.04496
	0.1369	0.1224	0.08866					0.07018	0.05494	0.05767					0.07259	0.1212	0.06879					0.06812	0.03577	0.01348
	0.06964	0.1356	0.08326					0.06138	0.08895	0.07819					0.06253	0.09661	0.07655					0.01217	0.07996	0.03259
	0.1001	0.07419	0.08343					0.01101	0.07777	0.05293					0.089	0.06606	0.08343					-0.006451	0.07301	0.01764
	0.1248	0.0951	0.07158					0.08809	0.01221	0.009346					-0.001169	0.0715	0.07145					0.06014	-0.005853	0.009346
	0.1362	0.09763	0.07979					0.1262	0.04698	0.08294					0.02278	0.09444	0.076					-0.0136	0.003219	0.05758
	0.08424	0.09425	0.1376					0.0662	0.05974	0.05652					0.07359	0.07304	0.1002					-0.01872	0.02802	-0.0105
	0.1647	0.05353	0.08642					0.05967	0.05306	0.06356					0.0759	0.05353	0.02278					0.04882	0.04497	-0.02044
	0.1494	0.08947	0.133					0.009433	0.06237	0.05262					0.09071	0.07172	0.09432					0.001399	0.06219	0.03817
	0.1356	0.07261	0.07982					0.09361	0.05509	0.05528					0.08829	0.07	0.07655					0.08764	0.04545	-0.04504
	0.1283	0.1321	0.08214					0.08471	0.07144	0.07346					0.1235	0.09431	0.08183					0.08215	0.04073	0.05421
	0.1367	0.19						0.1455	0.0605						0.05318	0.09111						0.03882	0.05644
	0.07518	0.08865						0.06347	0.05746						0.07503	0.03368						0.06322	0.01527
		0.09195							0.0217							0.08276							-0.007887
		0.017							0.01229							0.006996							0.01201
		0.1016							0.01846							0.0752							0.009261
Average	0.102157	0.0969414	0.0941182					0.075131	0.0605436	0.0701315
Overall average	0.0977388							0.0686021						Overall average	0.0743672						Overall average	0.0407989

## Sheet: Profile plot
Cell 18
	PICH mClover				CENPA				CEN
	Distance	Intensity	Relative		Distance	Intensity			Distance	Intensity
	0	2158.8			0	953.913			0	1724.27
	0.02015	2547.55			0.02015	1253.9			0.02015	2129.7
	0.0403	3077.53			0.0403	1606.94			0.0403	2518.98
	0.06045	3680.93			0.06045	1989.96			0.06045	2945.64
	0.0806	4455.16			0.0806	2400.17			0.0806	3453.76
	0.10075	5502.23			0.10075	2718.94			0.10075	3925.61
	0.1209	6651.98			0.1209	2868.14			0.1209	4469.22
	0.14105	7919.78			0.14105	2933.28			0.14105	5002.95
	0.1612	9189.3			0.1612	2877.08			0.1612	5541.29
	0.18135	10397.5			0.18135	2694.73			0.18135	5974.31
	0.2015	11470.9			0.2015	2400.56			0.2015	6286.55
	0.22165	11542.4			0.22165	1969.9			0.22165	6605.89
	0.2418	11425.5			0.2418	1569.03			0.2418	6973.11
	0.26195	11429.7			0.26195	1214.63			0.26195	7183.99
	0.2821	10934.8			0.2821	917.758			0.2821	7310.07
	0.30225	9840.87			0.30225	703.099			0.30225	7316.23
	0.3224	8621.68			0.3224	523.8			0.3224	7259.79
	0.34255	7594.21			0.34255	380.84			0.34255	7132.18
	0.3627	6586.1			0.3627	282.585			0.3627	7010.74
	0.38285	5695.96			0.38285	221.576			0.38285	6760.25
	0.403	4953.36			0.403	174.252			0.403	6503.94
	0.42315	4244.49			0.42315	140.18			0.42315	6230.03
	0.4433	3688.67			0.4433	117.626			0.4433	5925.15
	0.46345	3295.19			0.46345	104.684			0.46345	5541.93
	0.4836	2971.02			0.4836	94.211			0.4836	5182.19
	0.50375	2745.53			0.50375	85.252			0.50375	4912.04
	0.5239	2553.72			0.5239	77.391			0.5239	4614.89
	0.54405	2396.04			0.54405	70.565			0.54405	4296.81
	0.5642	2310.86			0.5642	64.74			0.5642	4094.59
	0.58435	2246.96			0.58435	59.515			0.58435	3909.69
	0.6045	2192.43			0.6045	54.719			0.6045	3722.47
	0.62465	2120.53			0.62465	50.027			0.62465	3512.19
	0.6448	2147.07			0.6448	46.805			0.6448	3489.25
	0.66495	2170.32			0.66495	44.049			0.66495	3468.57
	0.6851	2144.41			0.6851	41.538			0.6851	3384.53
	0.70525	2166.55			0.70525	39.829			0.70525	3384.17
	0.7254	2201.89			0.7254	38.622			0.7254	3425.52
	0.74555	2152.04			0.74555	37.897			0.74555	3376.77
	0.7657	2162.81			0.7657	37.697			0.7657	3440.62
	0.78585	2211.84			0.78585	37.773			0.78585	3564.4
	0.806	2189.02			0.806	38.136			0.806	3657.13
	0.82615	2144.95			0.82615	38.679			0.82615	3754.88
	0.8463	2130			0.8463	39.423			0.8463	3902.74
	0.86645	2074.66			0.86645	40.177			0.86645	4026.64
	0.8866	2064.49			0.8866	41.562			0.8866	4236.2
	0.90675	2028.82			0.90675	42.925			0.90675	4398.65
	0.9269	1988.8			0.9269	44.479			0.9269	4542.84
	0.94705	1968.98			0.94705	46.99			0.94705	4725.98
	0.9672	1947.47			0.9672	50.138			0.9672	4904.47
	0.98735	1931.96			0.98735	53.499			0.98735	5097.72
	1.0075	1940.79			1.0075	58.247			1.0075	5331.9
	1.02765	1979.13			1.02765	65.259			1.02765	5606.29
	1.0478	1990.52			1.0478	72.074			1.0478	5761.18
	1.06795	2017.58			1.06795	79.851			1.06795	5943.15
	1.0881	2114.69			1.0881	91.383			1.0881	6255.15
	1.10825	2248.29			1.10825	108.172			1.10825	6518.92
	1.1284	2361.53			1.1284	123.901			1.1284	6756.03
	1.14855	2495.84			1.14855	140.591			1.14855	7059.88
	1.1687	2713.71			1.1687	167.891			1.1687	7245.28
	1.18885	2923.07			1.18885	193.366			1.18885	7317.1
	1.209	3128.68			1.209	215.62			1.209	7326.38
	1.22915	3285.55			1.22915	230.255			1.22915	7276.79
	1.2493	3676.19			1.2493	270.656			1.2493	7351.02
	1.26945	4175.35			1.26945	322.958			1.26945	7305.82
	1.2896	4758.82			1.2896	384.597			1.2896	7292.3
	1.30975	5352.93			1.30975	448.002			1.30975	7187.45
	1.3299	5777.18			1.3299	496.425			1.3299	6707.64
	1.35005	6367.86			1.35005	572.662			1.35005	6281
	1.3702	7049.78			1.3702	670.1			1.3702	6002.46
	1.39035	7447.58			1.39035	739.266			1.39035	5496.67
	1.4105	7770.67			1.4105	852.399			1.4105	5008.38
	1.43065	8250.35			1.43065	1012.65			1.43065	4666.08
	1.4508	8845.13			1.4508	1231.42			1.4508	4470.3
	1.47095	8863.13			1.47095	1520.79			1.47095	4312.02
	1.4911	8607.63			1.4911	1792.21			1.4911	3868.4
	1.51125	8489.4			1.51125	2202.2			1.51125	3556.54
	1.5314	8258.61			1.5314	2595.9			1.5314	3169.16
	1.55155	8029.36			1.55155	2999.4			1.55155	2997.3
	1.5717	7250.43			1.5717	3112.28			1.5717	2586.4
	1.59185	6515.88			1.59185	3234.95			1.59185	2218.04
	1.612	5744.92			1.612	3225.37			1.612	1860.31
	1.63215	5038.47			1.63215	3066.78			1.63215	1579.4
	1.6523	4351.45			1.6523	2745.68			1.6523	1345.92
