# Supplementary material for: Centromere protection requires strict mitotic inactivation of the Bloom syndrome helicase complex
Source: Research Square preprint supplement (doi:10.21203/rs.3.rs-4420374/v1), 2024-05-30
Supplement: Supplementary file 34 [file Fig S1E. RPE1_siSGO1 vs UFBs_mB-4.xlsx]

## Sheet: WT
A
MAX_RPE1-STB-ICRF_mBLMrPICHCEN-01-Z3-23
			Area	Mean	Min	Max	Length	Mean correct	If mean<0
Background	PICH	1	0.152	7881.57	7171	9368.5	2.376	0	0
	BLM	2	0.152	5869.21	5529.48	6419.27	2.376	0	0
	PICH	3	0.215	10055.1	8197	12599.6	3.3	2173.53	2173.53
	BLM	4	0.215	6899.38	5598.88	7555.44	3.3	1030.18	1030.18
	PICH	5	0.33	14032.1	7203.31	18248.4	5.048	6150.51	6150.51
	BLM	6	0.33	7889.84	5080.8	9722.9	5.048	2020.63	2020.63
	PICH	7	0.296	15565.3	8026.98	19846.2	4.548	7683.75	7683.75
	BLM	8	0.296	8958.57	5167.58	12311.4	4.548	3089.36	3089.36
	PICH	9	0.059	15367.6	13971	16484.4	0.905	7486.08	7486.08
	BLM	10	0.059	8496.81	8024.94	8971.41	0.905	2627.6	2627.6
	PICH	11	0.448	12521.3	6569	19624.3	6.888	4639.7	4639.7
	BLM	12	0.448	7858.47	4887	12116.3	6.888	1989.27	1989.27
	PICH	13	0.406	14061.8	8063.93	18423.7	6.191	6180.28	6180.28
	BLM	14	0.406	8262.26	5791	10896.7	6.191	2393.05	2393.05
	PICH	15	0.393	12539.6	7373.99	20706.7	6.04	4658.01	4658.01
	BLM	16	0.393	7700.38	5314.86	11191.5	6.04	1831.17	1831.17
	PICH	17	0.161	20072.1	12603.6	23159.9	2.438	12190.5	12190.5
	BLM	18	0.161	10151	6678.87	12528.7	2.438	4281.83	4281.83
	PICH	19	0.215	16631.6	12478	19585.8	3.29	8750.07	8750.07
	BLM	20	0.215	9045.56	6642	11083	3.29	3176.35	3176.35
	PICH	21	0.194	14067	11727.2	16584.4	2.974	6185.44	6185.44
	BLM	22	0.194	8119.3	6770.62	9058.98	2.974	2250.09	2250.09
	PICH	23	0.228	13711.9	9641.55	16065.6	3.475	5830.31	5830.31
	BLM	24	0.228	7624.43	6080.27	8697.01	3.475	1755.22	1755.22
	PICH	25	0.368	11148.9	8077.2	14782	5.631	3267.36	3267.36
	BLM	26	0.368	6922.51	5336.91	8981.18	5.631	-959.053	0
	PICH	27	0.194	10764.9	5563.25	15058.4	2.942	4895.67	4895.67
	BLM	28	0.194	7492.72	5068.25	9093.33	2.942	-388.848	0
	PICH	29	0.237	9636.78	5999.34	13424.4	3.579	3767.57	3767.57
	BLM	30	0.237	9636.78	5999.34	13424.4	3.579	1755.21	1755.21
	PICH	31	0.241	8300.83	6307	10481.1	3.663	2431.63	2431.63
	BLM	32	0.241	5787.09	4467.64	7248.38	3.663	-2094.48	0
A
MAX_RPE1-STB-ICRF_mBLMrPICHCEN-02-Z4-19
			Area	Mean	Min	Max	Length	Mean correct	If mean<0
Background	PICH	1	0.161	5600.97	5121.36	6470.31	2.406	0	0
	BLM	2	0.161	4256.94	3947.91	4559.76	2.406	0	0
	PICH	3	0.262	11363.2	7121	18181.7	3.981	5762.26	5762.26
	BLM	4	0.262	7519.41	5288.4	15104.4	3.981	3262.46	3262.46
	PICH	5	0.528	9533.44	4803	14865.5	8.101	3932.47	3932.47
	BLM	6	0.528	6716.79	4054	9668.35	8.101	2459.85	2459.85
	PICH	7	0.089	12615.4	7589.63	16169.9	1.453	7014.41	7014.41
	BLM	8	0.089	7494.51	5669	10651.1	1.453	3237.57	3237.57
	PICH	9	0.469	11030.8	5314	15263.9	7.191	5429.88	5429.88
	BLM	10	0.469	7959.89	4173	10227.5	7.191	3702.95	3702.95
A
MAX_RPE1-STB-ICRF_mBLMrPICHCEN-04-Z3-14
			Area	Mean	Min	Max	Length	Mean correct	If mean<0
Background	PICH	1	0.169	4099.23	3794	4554.43	2.538	0	0
	BLM	2	0.169	4195.85	3943.17	4955.84	2.538	0	0
	PICH	3	0.558	9933.33	5200.03	20691.1	8.578	5834.1	5834.1
	BLM	4	0.558	6157.14	4211	14538.9	8.578	1961.29	1961.29
	PICH	5	0.106	15981.8	6348.32	26012.3	1.583	11882.6	11882.6
	BLM	6	0.106	12178.2	4783	24974.8	1.583	7982.39	7982.39
EA
MAX_RPE1-STB-ICRF_mBLMrPICHCEN-06-Z7-31
			Area	Mean	Min	Max	Length	Mean correct	If mean<0
Background	PICH	1	0.127	8514.02	7301	9547	1.921	0	0
	BLM	2	0.127	5199.23	5038.72	5402	1.921	0	0
	PICH	3	0.448	12573.7	7272	17034.6	6.839	4059.71	4059.71
	BLM	4	0.448	6466.66	4426.31	8413.68	6.839	1267.43	1267.43
	PICH	5	0.169	14667.9	11542.2	16851.7	2.596	6153.87	6153.87
	BLM	6	0.169	6901.01	5964.86	7981.16	2.596	1701.78	1701.78
	PICH	7	0.22	12696.1	10962.7	14099.4	3.347	4182.11	4182.11
	BLM	8	0.22	6901.8	6339.1	7737.1	3.347	1702.58	1702.58
	PICH	9	0.363	13018.2	10612	15619.3	5.558	4504.21	4504.21
	BLM	10	0.363	6774.73	5394.5	8151.52	5.558	1575.5	1575.5
	PICH	11	0.156	15944.8	13136	19561.9	2.419	7430.75	7430.75
	BLM	12	0.156	8128.58	7029.17	9740.84	2.419	2929.36	2929.36
	PICH	13	0.097	13356.3	11372.2	14684.5	1.488	4842.29	4842.29
	BLM	14	0.097	7297.9	6434.75	8221.08	1.488	2098.68	2098.68
	PICH	15	0.693	11908	8796.5	15061.7	10.653	3394.02	3394.02
	BLM	16	0.693	6513.6	5221.68	9297.17	10.653	1314.38	1314.38
	PICH	17	0.368	12127.6	8662.11	15918.7	5.614	3613.6	3613.6
	BLM	18	0.368	6804.59	5193.07	11183	5.614	1605.36	1605.36
	PICH	19	0.456	13500.1	10363.2	17034.3	6.978	4986.09	4986.09
	BLM	20	0.456	6309.93	5263.61	7593.96	6.978	1110.7	1110.7
	PICH	21	0.401	15240.4	10865	18283.8	6.211	6726.34	6726.34
	BLM	22	0.401	7287.42	5697.8	9011.76	6.211	2088.19	2088.19
	PICH	23	0.41	14331	9724.66	17789.7	6.243	5816.95	5816.95
	BLM	24	0.41	7098.79	5563	8662.18	6.243	1899.56	1899.56
	PICH	25	0.401	14274.6	10077.8	19367	6.182	5760.61	5760.61
	BLM	26	0.401	6981.41	5638.19	8196.22	6.182	1782.18	1782.18
	PICH	27	0.215	17287.8	11331	22055.5	3.305	8773.73	8773.73
	BLM	28	0.215	8252.53	6054	9951.7	3.305	3053.31	3053.31
A
MAX_RPE1-STB-ICRF_mBLMrPICHCEN-07-Z7-28
			Area	Mean	Min	Max	Length	Mean correct	If mean<0
Background	PICH	1	0.135	5822.4	5186.39	6380.82	2.024	0	0
	BLM	2	0.135	4791.91	4592.48	5044.75	2.024	0	0
	PICH	3	0.465	10236.6	6952.85	13979.9	7.09	4414.15	4414.15
	BLM	4	0.465	6422.5	4794	8552.6	7.09	1630.59	1630.59
	PICH	5	0.359	11962.1	7238	14311.8	5.524	6139.67	6139.67
	BLM	6	0.359	6794.27	4913	8125.36	5.524	2002.35	2002.35
	PICH	7	0.254	12484.2	9750.23	15747	3.854	6661.76	6661.76
	BLM	8	0.254	7068.41	6162.62	10438	3.854	2276.5	2276.5
	PICH	9	0.169	11628.5	9421.95	14984.5	2.582	5806.15	5806.15
	BLM	10	0.169	6900.46	5572.14	8325.99	2.582	2108.54	2108.54
	PICH	11	0.258	14859.6	10527	18134.1	3.934	9037.2	9037.2
	BLM	12	0.258	7987.49	5746	10016.4	3.934	3195.58	3195.58
	PICH	13	0.3	12846.6	10198	16997.8	4.594	7024.23	7024.23
	BLM	14	0.3	7328.22	5873	8221.84	4.594	2536.3	2536.3
	PICH	15	0.414	12773.9	7590.86	16525.2	6.343	6951.45	6951.45
	BLM	16	0.414	7095.66	5182	8724.68	6.343	2303.74	2303.74
	PICH	17	0.511	12905.6	8780	17112	7.879	7083.19	7083.19
	BLM	18	0.511	6901.16	5015	7957.84	7.879	2109.24	2109.24
	PICH	19	0.325	14007.4	9158.8	18017.8	4.983	8184.97	8184.97
	BLM	20	0.325	7342.49	5366.78	9708.88	4.983	2550.58	2550.58
	PICH	21	0.296	14297.4	8928.5	17420.9	4.571	8475.01	8475.01
	BLM	22	0.296	7298.82	5053.5	9047.29	4.571	2506.9	2506.9
	PICH	23	0.296	12622	8508	16249.8	4.552	6799.62	6799.62
	BLM	24	0.296	6970.52	5182.5	10093.8	4.552	2178.61	2178.61
	PICH	25	0.059	13231.3	11747	14238.9	0.851	7408.86	7408.86
	BLM	26	0.059	6753.76	6141.5	7171.83	0.851	1961.84	1961.84
	PICH	27	0.338	10814.3	7775	13910.3	5.177	4991.86	4991.86
	BLM	28	0.338	6156.22	4939	7738.93	5.177	1364.31	1364.31
	PICH	29	0.139	10290.7	8310.65	11957	2.082	4468.27	4468.27
	BLM	30	0.139	6129.5	4875.11	6620.12	2.082	1337.58	1337.58
A
MAX_RPE1-STB-ICRF_mBLMrPICHCEN-10-Z5-23
			Area	Mean	Min	Max	Length	Mean correct	If mean<0
Background	PICH	1	0.118	5994.9	5559.7	6992.06	1.813	0	0
	BLM	2	0.118	4414.18	4128.92	4779.5	1.813	0	0
	PICH	3	0.215	11634.2	7141	15735.6	3.317	5639.34	5639.34
	BLM	4	0.215	7373.52	5098.5	9470.47	3.317	2959.34	2959.34
	PICH	5	0.503	11792.6	4973.13	16358.4	7.743	5797.66	5797.66
	BLM	6	0.503	7700.56	3802.14	10856.6	7.743	3286.39	3286.39
	PICH	7	0.511	11790.1	7731.09	17086.6	7.819	5795.19	5795.19
	BLM	8	0.511	7186.69	5771.35	9437.06	7.819	2772.51	2772.51
	PICH	9	0.08	10781	7729.26	15534.2	1.208	4786.05	4786.05
	BLM	10	0.08	8802.23	5868.25	10523.1	1.208	4388.05	4388.05
	PICH	11	0.477	9826.45	5443.5	14382.3	7.368	3831.55	3831.55
	BLM	12	0.477	6410.8	3957.28	9637.89	7.368	1996.62	1996.62
EA
MAX_RPE1-STB-ICRF_mBLMrPICHCEN-12-Z7-22
			Area	Mean	Min	Max	Length	Mean correct	If mean<0
Background	PICH	1	0.165	3724.06	3441.96	4110.7	2.515	0	0
	BLM	2	0.165	3332.54	3198.24	3535.97	2.515	0	0
	PICH	3	0.186	5937.68	4905.02	8278.69	2.856	2213.62	2213.62
	BLM	4	0.186	4727.21	3871.73	6197.42	2.856	1394.67	1394.67
	PICH	5	0.228	4717.21	3964	5724.38	3.469	993.149	993.149
	BLM	6	0.228	3955.91	3321.74	4800.18	3.469	623.368	623.368
	PICH	7	0.313	5621.22	4206.5	7760.72	4.791	1897.17	1897.17
	BLM	8	0.313	4057.7	3362.99	6063.02	4.791	725.163	725.163
	PICH	9	0.363	6236.67	4216.22	7819.52	5.748	2512.61	2512.61
	BLM	10	0.363	4673.28	3705.14	5593.59	5.748	1340.74	1340.74
	PICH	11	0.177	5964.19	4641.44	6888.35	2.711	2240.13	2240.13
	BLM	12	0.177	4075.34	3657.35	4647.45	2.711	742.8	742.8
	PICH	13	0.232	6674.62	5009.9	8189.42	3.532	2950.57	2950.57
	BLM	14	0.232	4574.58	3727.16	5932.11	3.532	1242.04	1242.04
	PICH	15	0.241	5356.88	4261.06	6248.05	3.646	1632.82	1632.82
	BLM	16	0.241	3774.52	3352.87	4342.38	3.646	441.984	441.984
	PICH	17	0.275	6408.49	4623.35	9097.52	4.199	2684.43	2684.43
	BLM	18	0.275	4257.25	3479.22	5469.68	4.199	924.712	924.712
	PICH	19	0.22	5164.53	4062	6411.62	3.371	1440.48	1440.48
	BLM	20	0.22	4266.52	3464.1	5269.92	3.371	933.977	933.977
A
MAX_RPE1-STB-ICRF_mBLMrPICHCEN-13-1-Z-7-22
			Area	Mean	Min	Max	Length	Mean correct	If mean<0
Background	PICH	1	0.19	4818.04	4162.49	6258.82	2.891	0	0
	BLM	2	0.19	3972.59	3785.83	4135.5	2.891	0	0
	PICH	3	0.325	5994.83	4865.29	9627.78	5.027	1176.79	1176.79
	BLM	4	0.325	4786.99	3813	6486.26	5.027	814.402	814.402
	PICH	5	0.19	7023.69	4354.5	9630.56	2.886	2205.65	2205.65
	BLM	6	0.19	4897.85	3914.5	6523.57	2.886	925.259	925.259
	PICH	7	0.583	7262.12	4595.08	11122.7	8.954	2444.08	2444.08
	BLM	8	0.583	5336.64	4128.34	6731.19	8.954	1364.06	1364.06
	PICH	9	0.604	7344.53	4726.11	10050.5	9.271	2526.49	2526.49
	BLM	10	0.604	5443.31	3872.25	7022.37	9.271	1470.72	1470.72
	PICH	11	0.507	7948.55	5807.29	11058.6	7.789	3130.51	3130.51
	BLM	12	0.507	6241.75	4818.78	9140.59	7.789	2269.16	2269.16
	PICH	13	0.482	7635.88	4414	10536.9	7.395	2817.83	2817.83
	BLM	14	0.482	5871.05	3982	8458.54	7.395	1898.46	1898.46
	PICH	15	0.346	8487.33	5762.85	10347.3	5.324	3669.29	3669.29
	BLM	16	0.346	5944.79	4960.3	7106.5	5.324	1972.21	1972.21
	PICH	17	0.465	7811.11	4856.4	9603.69	7.098	2993.07	2993.07
	BLM	18	0.465	5614.8	3970.2	7455.69	7.098	1642.21	1642.21
	PICH	19	0.304	7418.23	5502	8980.81	4.663	2600.19	2600.19
	BLM	20	0.304	5451	4462.5	6716.07	4.663	1478.41	1478.41
	PICH	21	0.553	7293.46	4059.5	9704.15	8.497	2475.42	2475.42
	BLM	22	0.553	5558.96	3613	7000.09	8.497	1586.38	1586.38
	PICH	23	0.334	6539.78	4852.75	7275	5.121	1721.74	1721.74
	BLM	24	0.334	5250.92	4118	5968.92	5.121	1278.33	1278.33
	PICH	25	0.186	7905.23	5747.19	10567.9	2.854	3087.19	3087.19
	BLM	26	0.186	5345.94	4463.11	7014.39	2.854	1373.35	1373.35
	PICH	27	0.532	7069.75	5031.6	10075.5	8.199	2251.71	2251.71
	BLM	28	0.532	4872.11	3955.52	6448.81	8.199	899.524	899.524
	PICH	29	0.152	8172.55	6150.21	9820.53	2.318	3354.51	3354.51
	BLM	30	0.152	5194.13	4255.25	6299.98	2.318	1221.54	1221.54
A
MAX_RPE1-STB-ICRF_mBLMrPICHCEN-13-2-Z10-26
			Area	Mean	Min	Max	Length	Mean correct
Background	PICH	1	0.186	5862.49	4972.94	6613.13	2.796	0
	BLM	2	0.186	4413.39	3985.89	5319.27	2.796	0
	PICH	3	0.482	7230.6	4698	8948.01	7.374	1368.11
	BLM	4	0.482	5934.09	4148.16	7754.16	7.374	1520.7
	PICH	5	0.651	7175.1	4704.93	8953.14	9.957	1312.61
	BLM	6	0.651	6412.61	4213	8424.56	9.957	1999.22
EA
MAX_RPE1-STB-ICRF_mBLMrPICHCEN-14-Z7-23
			Area	Mean	Min	Max	Length	Mean correct
Background	PICH	1	0.156	4690.52	4172.4	5444.43	2.373	0
	BLM	2	0.156	4405	4156.67	4852.12	2.373	0
	PICH	3	0.207	5385.9	4251	6609.72	3.174	695.383
	BLM	4	0.207	4554.08	4105.86	5388.2	3.174	149.075
	PICH	5	0.401	5136.45	4014.72	6662.85	6.133	445.938
	BLM	6	0.401	4518.01	3897.1	5300.36	6.133	113.008
	PICH	7	0.245	6737.11	4881	8317.8	3.757	2046.59
	BLM	8	0.245	5402.18	4110.25	6413.45	3.757	997.18
	PICH	9	0.123	7075.76	5838.54	8237.11	1.84	2385.25
	BLM	10	0.123	5971.52	5038.49	7330.38	1.84	1566.52
	PICH	11	0.486	5873.86	4372.28	8523.56	7.426	1183.34
	BLM	12	0.486	4935.18	3949.72	6431.47	7.426	530.18
	PICH	13	0.186	7064.65	5421.72	8688.35	2.894	2374.13
	BLM	14	0.186	5304.32	4326.8	6208.89	2.894	899.314
	PICH	15	0.161	8295.54	5909.22	10288.7	2.407	3605.02
	BLM	16	0.161	6184.72	4593	7399.36	2.407	1779.71
	PICH	17	0.207	7341.19	4768.1	9077.19	3.129	2650.67
	BLM	18	0.207	5114.94	4077.46	6694.75	3.129	709.94
	PICH	19	0.439	5436.68	4270.5	7734.58	6.721	746.167
	BLM	20	0.439	4420.76	3503.44	5693.69	6.721	15.754
	PICH	21	0.139	6150.48	4787.1	7528.54	2.128	1459.96
	BLM	22	0.139	4346.44	3823.15	4824.09	2.128	-58.561
	PICH	23	0.19	7550.73	5733.14	9116.03	2.89	2860.21
	BLM	24	0.19	4874.81	3733.68	6205.43	2.89	469.809
EA
MAX_RPE1-STB-ICRF_mBLMrPICHCEN-15-Z4-29
			Area	Mean	Min	Max	Length	Mean correct
Background	PICH	1	0.19	5379.2	5068.18	5715.93	2.921	0
	BLM	2	0.19	4484.9	4267.6	4946.16	2.921	0
	PICH	3	0.418	9586.51	5206	13281.4	6.421	4207.31
	BLM	4	0.418	5465.71	4437.79	6343.28	6.421	980.806
	PICH	5	0.11	9028.8	6029	12039.8	1.65	3649.59
	BLM	6	0.11	5207.01	4285	6173.82	1.65	722.103
	PICH	7	0.3	13221.2	6463.25	18244	4.554	7842.03
	BLM	8	0.3	7090.05	4777.33	11281.9	4.554	2605.14
	PICH	9	0.203	12613.4	7021	16044.2	3.09	7234.18
	BLM	10	0.203	7501.48	4938	10006.4	3.09	3016.57
	PICH	11	0.254	10890.1	7758.35	13461	3.886	5510.88
	BLM	12	0.254	6376.49	5298.34	7187.97	3.886	1891.59
	PICH	13	0.245	14411.9	7338.5	19936.2	3.734	9032.71
	BLM	14	0.245	6691.02	4829.19	8732.92	3.734	2206.11
	PICH	15	0.215	11435.6	7657.25	14458.9	3.285	6056.41
	BLM	16	0.215	6076.24	5069	6909.27	3.285	1591.33
	PICH	17	0.232	11134.6	7837.27	13583.3	3.517	5755.4
	BLM	18	0.232	6433.65	5475.14	7210.2	3.517	1948.75
	PICH	19	0.342	13126.5	6575.26	17923.7	5.227	7747.26
	BLM	20	0.342	6558.28	4973.44	8678.91	5.227	2073.38
	PICH	21	0.207	10500.7	6892	12877.3	3.161	5121.49
	BLM	22	0.207	6003.37	4789	6759.42	3.161	1518.46
	PICH	23	0.224	11400.1	8048.23	13374.5	3.473	6020.86
	BLM	24	0.224	5998.54	5294.5	6931.85	3.473	1513.63
	PICH	25	0.097	8797.32	6220.44	11411.2	1.501	3418.12
	BLM	26	0.097	5232.96	4427	5988.75	1.501	748.052
	PICH	27	0.237	10892.3	7177.67	14371.6	3.621	5513.13
	BLM	28	0.237	6221.55	4846.41	7971.66	3.621	1736.65
	PICH	29	0.135	8028.75	6773.76	9423.88	2.076	2649.55
	BLM	30	0.135	5382.69	4623.1	6405.58	2.076	897.788
	PICH	31	0.135	7818.79	5973.25	9091.13	2.07	2439.58
	BLM	32	0.135	5602.11	4641	7130.95	2.07	1117.21

## Sheet: All data
	RPE1 WT					RPE1 siSgo1
	mid-anaphase		early-anaphase
	Channel	Absolute intensity	Channel	Absolute intensity		Channel	Absolute intensity	BLM/PICH
	PICH	2173.53	PICH	4059.71		PICH	4277.91	0.0769998
	BLM	1030.18	BLM	1267.43		BLM	329.398
	PICH	6150.51	PICH	6153.87		PICH	4340.74	0.123184
	BLM	2020.63	BLM	1701.78		BLM	534.709
	PICH	7683.75	PICH	4182.11		PICH	3550.89	0.147584
	BLM	3089.36	BLM	1702.58		BLM	524.055
	PICH	7486.08	PICH	4504.21		PICH	5714.23	0.105512
	BLM	2627.6	BLM	1575.5		BLM	602.919
	PICH	4639.7	PICH	7430.75		PICH	8200.35	0.15106
	BLM	1989.27	BLM	2929.36		BLM	1238.75
	PICH	6180.28	PICH	4842.29		PICH	5135.47	0.191016
	BLM	2393.05	BLM	2098.68		BLM	980.957
	PICH	4658.01	PICH	3394.02		PICH	3502.28	0.399056
	BLM	1831.17	BLM	1314.38		BLM	1397.61
	PICH	12190.5	PICH	3613.6		PICH	5905.97	0.196068
	BLM	4281.83	BLM	1605.36		BLM	1157.97
	PICH	8750.07	PICH	4986.09		PICH	4037.56	0.450577
	BLM	3176.35	BLM	1110.7		BLM	1819.23
	PICH	6185.44	PICH	6726.34		PICH	4520	0.252575
	BLM	2250.09	BLM	2088.19		BLM	1141.64
	PICH	5830.31	PICH	5816.95		PICH	4590.35	0.21012
	BLM	1755.22	BLM	1899.56		BLM	964.526
	PICH	3267.36	PICH	5760.61		PICH	5873.83	0.204979
	BLM	0	BLM	1782.18		BLM	1204.01
	PICH	4895.67	PICH	8773.73		PICH	4981.4	0.14476
	BLM	0	BLM	3053.31		BLM	721.109
	PICH	3767.57				PICH	6176.84	0.126728
	BLM	1755.21				BLM	782.781
	PICH	2431.63				PICH	3867.83	0.0984832
	BLM	0				BLM	380.916
	PICH	5762.26				PICH	4594.79	0.154568
	BLM	3262.46				BLM	710.206
	PICH	3932.47				PICH	3893	0.31939
	BLM	2459.85				BLM	1243.39
	PICH	7014.41				PICH	4209.75	0.245196
	BLM	3237.57				BLM	1032.21
	PICH	5429.88				PICH	5005.68	0.260996
	BLM	3702.95				BLM	1306.47
	PICH	5834.1				PICH	5181.35	0.234694
	BLM	1961.29				BLM	1216.03
	PICH	11882.6				PICH	4994.33	0.37882
	BLM	7982.39				BLM	1891.95
						PICH	3646.54	0.280889
						BLM	1024.27
						PICH	4217.11	0.166511
						BLM	702.197
						PICH	1923.28	0.202054
						BLM	388.606
						PICH	3163.63	0.195877
						BLM	619.681
						PICH	3640.14	0.20266
						BLM	737.712
						PICH	2134.56	0.162873
						BLM	347.662
						PICH	1678.51	0.212969
						BLM	357.469
						PICH	4063.63	0.135842
						BLM	552.011
						PICH	2048.02	0.169035
						BLM	346.186
						PICH	2591.85	0.162553
						BLM	421.314
						PICH	3244.87	0.128942
						BLM	418.401
						PICH	3432.54	0.182125
						BLM	625.15
						PICH	1877.39	0.153205
						BLM	287.626
						PICH	938.082	0.0543503
						BLM	50.985
						PICH	2859.06	0.127216
						BLM	363.718
						PICH	3451.2	0.158445
						BLM	546.825
						PICH	2895.24	0.113953
						BLM	329.922
						PICH	3426.72	0.111632
						BLM	382.533
						PICH	4988.38	0.332309
						BLM	1657.68
						PICH	3595.82	0.161538
						BLM	580.861
						PICH	5466.78	0.242348
						BLM	1324.86
						PICH	8134.75	0.24864
						BLM	2022.62
						PICH	6338.71	0.140383
						BLM	889.85
						PICH	4602.28	0.165825
						BLM	763.171
						PICH	5721.19	0.0589509
						BLM	337.269
						PICH	5287.08	0.141677
						BLM	749.056
						PICH	5204.5	0.161836
						BLM	842.277
						PICH	6224.77	0.197419
						BLM	1228.89
						PICH	7595.95	0.173546
						BLM	1318.25
						PICH	9349.3	0.265824
						BLM	2485.26
						PICH	3802.52	0.200906
						BLM	763.947
						PICH	4917.3	0.21656
						BLM	1064.89
						PICH	5809.11	0.187362
						BLM	1088.41
						PICH	5397.71	0.179314
						BLM	967.885
						PICH	1950.18	0.149129
						BLM	290.829
						PICH	1710.12	0.127959
						BLM	218.824
						PICH	1394.57	0.136103
						BLM	189.805
						PICH	1660.56	0.0966635
						BLM	160.515
						PICH	3025.43	0.315254
						BLM	953.781
						PICH	2148.98	0.240886
						BLM	517.659
						PICH	3762.2	0.20861
						BLM	784.835
						PICH	2112.15	0.325034
						BLM	686.522
						PICH	2161.55	0.149283
						BLM	322.682
						PICH	2163.65	0.218566
						BLM	472.9
						PICH	8738.77	0.123031
						BLM	1075.14
						PICH	4803.21	0.120189
						BLM	577.294
						PICH	9080.2	0.196375
						BLM	1783.12
						PICH	5249.41	0.296884
						BLM	1558.46
						PICH	9814.86	0.0965508
						BLM	947.633
						PICH	6018.84	0.12005
						BLM	722.561
						PICH	4850.93	0.0164804
						BLM	79.945
						PICH	5112.75	0.314434
						BLM	1607.62
						PICH	5828.56	0.0752
						BLM	438.308
						PICH	1626.74	0.267799
						BLM	435.639
						PICH	359.642	0
						BLM	0
						PICH	1344.97	0.120763
						BLM	162.423
						PICH	2100.78	0.0795224
						BLM	167.059
						PICH	1618.2	0.211926
						BLM	342.939
						PICH	2481.42	0.183218
						BLM	454.642
						PICH	2853.58	0.283432
						BLM	808.794
						PICH	3746.3	0.30367
						BLM	1137.64
						PICH	2545.84	0.276986
						BLM	705.163
						PICH	1460.64	0.244796
						BLM	357.56
						PICH	1717.62	0.315968
						BLM	542.712
						PICH	3530.01	0.143997
						BLM	508.31
						PICH	2442.81	0.200033
						BLM	488.644
						PICH	2868.4	0.546737
						BLM	1568.26
						PICH	3219.27	0.272819
						BLM	878.278
						PICH	3193.32	0.313778
						BLM	1001.99
						PICH	3902.47	0.333355
						BLM	1300.91
						PICH	2675.41	0.443484
						BLM	1186.5
						PICH	5622.29	0.310867
						BLM	1747.79
						PICH	5484.63	0.428238
						BLM	2348.73
						PICH	4848.71	0.375622
						BLM	1821.28
						PICH	5226.28	0.417587
						BLM	2182.43
						PICH	3665.27	0.258883
						BLM	948.875
						PICH	2870.24	0.509178
						BLM	1461.46
						PICH	5031.64	0.10017
						BLM	504.021
						PICH	4657.21	0.0513938
						BLM	239.352
						PICH	4324.05	0.0510355
						BLM	220.68
						PICH	2815.86	0.145412
						BLM	409.46
						PICH	4597.48	0.13657
						BLM	627.879
						PICH	6885.12	0.110633
						BLM	761.723
						PICH	7023.44	0.0660365
						BLM	463.804
						PICH	4516.48	0.0556462
						BLM	251.325
						PICH	7220.59	0.0249494
						BLM	180.149
						PICH	1286.72	0.117075
						BLM	150.643
						PICH	3629.58	0.137121
						BLM	497.693
						PICH	876.716	0.43402
						BLM	380.512
						PICH	4091.8	0.204064
						BLM	834.99
						PICH	2593.63	0.244481
						BLM	634.093
						PICH	4132	0.192726
						BLM	796.345
						PICH	8345.98	0.214289
						BLM	1788.45
						PICH	9709.25	0.195819
						BLM	1901.26
						PICH	6526.89	0.191062
						BLM	1247.04
						PICH	8390.86	0.158594
						BLM	1330.74
						PICH	4908.15	0.2359
						BLM	1157.83
						PICH	6207.94	0.177517
						BLM	1102.02
						PICH	6255.03	0.21405
						BLM	1338.89
						PICH	6676.49	0.1679
						BLM	1120.99
						PICH	5455.82	0.136601
						BLM	745.272
						PICH	5024.97	0.134216
						BLM	674.43
						PICH	4661.77	0.115795
						BLM	539.81
						PICH	3151.7	0.240477
						BLM	757.91
						PICH	3975.61	0.137587
						BLM	546.992
						PICH	4310.96	0.115424
						BLM	497.588
						PICH	2585.13	0.123702
						BLM	319.785
						PICH	3824.47	0.151902
						BLM	580.947
						PICH	4922.84	0.0752584
						BLM	370.485
						PICH	7051.25	0.0730288
						BLM	514.944
						PICH	4252.73	0.0201092
						BLM	85.519
						PICH	2026.52	0.073497
						BLM	148.943
						PICH	5097.51	0.050263
						BLM	256.216
						PICH	3846.26	0.0537319
						BLM	206.667
						PICH	5614.74	0.132243
						BLM	742.509
						PICH	4952.7	0.115509
						BLM	572.082
						PICH	5352.1	0.152084
						BLM	813.967
						PICH	5731.34	0.154693
						BLM	886.599
						PICH	5596.26	0.143839
						BLM	804.958
						PICH	3920.19	0.0687107
						BLM	269.359
						PICH	2501.65	0.0371523
						BLM	92.942
						PICH	1489.19	0.109768
						BLM	163.465

## Sheet: Early-late anaphase
	Early anaphase UFBs				Mid/late anaphase UFBs				Early PICH	Early BLM		Mid/late PICH	Mid/late BLM									RPE1 siSgo1
	Channel	Absolute intensity	BLM/PICH		Channel	Absolute intensity	BLM/PICH		4059.71	1267.43		2173.53	1030.18									Channel	Absolute intensity	Channel	Absolute intensity
	PICH	4059.71	0.312197		PICH	2173.53	0.473966		6153.87	1701.78		6150.51	2020.63									PICH	4277.91	BLM	329.398
	BLM	1267.43			BLM	1030.18			4182.11	1702.58		7683.75	3089.36									PICH	4340.74	BLM	534.709
	PICH	6153.87	0.276538		PICH	6150.51	0.328531		4504.21	1575.5		7486.08	2627.6									PICH	3550.89	BLM	524.055
	BLM	1701.78			BLM	2020.63			7430.75	2929.36		4639.7	1989.27									PICH	5714.23	BLM	602.919
	PICH	4182.11	0.40711		PICH	7683.75	0.402064		4842.29	2098.68		6180.28	2393.05									PICH	8200.35	BLM	1238.75
	BLM	1702.58			BLM	3089.36			3394.02	1314.38		4658.01	1831.17									PICH	5135.47	BLM	980.957
	PICH	4504.21	0.349785		PICH	7486.08	0.350998		3613.6	1605.36		12190.5	4281.83									PICH	3502.28	BLM	1397.61
	BLM	1575.5			BLM	2627.6			4986.09	1110.7		8750.07	3176.35									PICH	5905.97	BLM	1157.97
	PICH	7430.75	0.394221		PICH	4639.7	0.428749		6726.34	2088.19		6185.44	2250.09									PICH	4037.56	BLM	1819.23
	BLM	2929.36			BLM	1989.27			5816.95	1899.56		5830.31	1755.22									PICH	4520	BLM	1141.64
	PICH	4842.29	0.433406		PICH	6180.28	0.387207		5760.61	1782.18		3267.36	0									PICH	4590.35	BLM	964.526
	BLM	2098.68			BLM	2393.05			8773.73	3053.31		4895.67	0									PICH	5873.83	BLM	1204.01
	PICH	3394.02	0.387262		PICH	4658.01	0.393122		4414.15	1630.59		3767.57	1755.21									PICH	4981.4	BLM	721.109
	BLM	1314.38			BLM	1831.17			6139.67	2002.35		2431.63	0									PICH	6176.84	BLM	782.781
	PICH	3613.6	0.444257		PICH	12190.5	0.351243		6661.76	2276.5		5762.26	3262.46									PICH	3867.83	BLM	380.916
	BLM	1605.36			BLM	4281.83			5806.15	2108.54		3932.47	2459.85									PICH	4594.79	BLM	710.206
	PICH	4986.09	0.22276		PICH	8750.07	0.363008		9037.2	3195.58		7014.41	3237.57									PICH	3893	BLM	1243.39
	BLM	1110.7			BLM	3176.35			7024.23	2536.3		5429.88	3702.95									PICH	4209.75	BLM	1032.21
	PICH	6726.34	0.31045		PICH	6185.44	0.363772		6951.45	2303.74		5834.1	1961.29									PICH	5005.68	BLM	1306.47
	BLM	2088.19			BLM	2250.09			7083.19	2109.24		11882.6	7982.39									PICH	5181.35	BLM	1216.03
	PICH	5816.95	0.326556		PICH	5830.31	0.301052		8184.97	2550.58		1507.94	607.346									PICH	4994.33	BLM	1891.95
	BLM	1899.56			BLM	1755.22			8475.01	2506.9		1546.88	240.517									PICH	3646.54	BLM	1024.27
	PICH	5760.61	0.309374		PICH	3267.36	0		6799.62	2178.61		2071.85	356.397									PICH	4217.11	BLM	702.197
	BLM	1782.18			BLM	0			7408.86	1961.84		2496.89	357.276									PICH	1923.28	BLM	388.606
	PICH	8773.73	0.348006		PICH	4895.67	0		4991.86	1364.31		2564.51	558.372									PICH	3163.63	BLM	619.681
	BLM	3053.31			BLM	0			4468.27	1337.58		3385.23	832.603									PICH	3640.14	BLM	737.712
	PICH	4414.15	0.3694		PICH	3767.57	0.465874		2213.62	1394.67		2009.77	341.808									PICH	2134.56	BLM	347.662
	BLM	1630.59			BLM	1755.21			993.149	623.368		1174.1	100.165									PICH	1678.51	BLM	357.469
	PICH	6139.67	0.326133		PICH	2431.63	0		1897.17	725.163		5639.34	2959.34									PICH	4063.63	BLM	552.011
	BLM	2002.35			BLM	0			2512.61	1340.74		5797.66	3286.39									PICH	2048.02	BLM	346.186
	PICH	6661.76	0.341726		PICH	5762.26	0.566178		2240.13	742.8		5795.19	2772.51									PICH	2591.85	BLM	421.314
	BLM	2276.5			BLM	3262.46			2950.57	1242.04		4786.05	4388.05									PICH	3244.87	BLM	418.401
	PICH	5806.15	0.363157		PICH	3932.47	0.625524		1632.82	441.984		3831.55	1996.62									PICH	3432.54	BLM	625.15
	BLM	2108.54			BLM	2459.85			2684.43	924.712		1176.79	814.402									PICH	1877.39	BLM	287.626
	PICH	9037.2	0.353603		PICH	7014.41	0.46156		1440.48	933.977		2205.65	925.259									PICH	938.082	BLM	50.985
	BLM	3195.58			BLM	3237.57			695.383	149.075		2444.08	1364.06									PICH	2859.06	BLM	363.718
	PICH	7024.23	0.361079		PICH	5429.88	0.681957		445.938	113.008		2526.49	1470.72									PICH	3451.2	BLM	546.825
	BLM	2536.3			BLM	3702.95			2046.59	997.18		3130.51	2269.16									PICH	2895.24	BLM	329.922
	PICH	6951.45	0.331405		PICH	5834.1	0.336176		2385.25	1566.52		2817.83	1898.46									PICH	3426.72	BLM	382.533
	BLM	2303.74			BLM	1961.29			1183.34	530.18		3669.29	1972.21									PICH	4988.38	BLM	1657.68
	PICH	7083.19	0.297781		PICH	11882.6	0.671773		2374.13	899.314		2993.07	1642.21									PICH	3595.82	BLM	580.861
	BLM	2109.24			BLM	7982.39			3605.02	1779.71		2600.19	1478.41									PICH	5466.78	BLM	1324.86
	PICH	8184.97	0.311617		PICH	1507.94	0.402765		2650.67	709.94		2475.42	1586.38									PICH	8134.75	BLM	2022.62
	BLM	2550.58			BLM	607.346			746.167	15.754		1721.74	1278.33									PICH	6338.71	BLM	889.85
	PICH	8475.01	0.2958		PICH	1546.88	0.155485		1459.96	0		3087.19	1373.35									PICH	4602.28	BLM	763.171
	BLM	2506.9			BLM	240.517			2860.21	469.809		2251.71	899.524									PICH	5721.19	BLM	337.269
	PICH	6799.62	0.320401		PICH	2071.85	0.172019		4207.31	980.806		3354.51	1221.54									PICH	5287.08	BLM	749.056
	BLM	2178.61			BLM	356.397			3649.59	722.103		1368.11	1520.7									PICH	5204.5	BLM	842.277
	PICH	7408.86	0.264797		PICH	2496.89	0.143088		7842.03	2605.14		1312.61	1999.22									PICH	6224.77	BLM	1228.89
	BLM	1961.84			BLM	357.276			7234.18	3016.57		4190.03	2360.2									PICH	7595.95	BLM	1318.25
	PICH	4991.86	0.273306		PICH	2564.51	0.217731		5510.88	1891.59		3010.05	2078.29									PICH	9349.3	BLM	2485.26
	BLM	1364.31			BLM	558.372			9032.71	2206.11												PICH	3802.52	BLM	763.947
	PICH	4468.27	0.299351		PICH	3385.23	0.245952		6056.41	1591.33												PICH	4917.3	BLM	1064.89
	BLM	1337.58			BLM	832.603			5755.4	1948.75												PICH	5809.11	BLM	1088.41
	PICH	2213.62	0.63004		PICH	2009.77	0.170073		7747.26	2073.38												PICH	5397.71	BLM	967.885
	BLM	1394.67			BLM	341.808			5121.49	1518.46												PICH	1950.18	BLM	290.829
	PICH	993.149	0.627668		PICH	1174.1	0.0853122		6020.86	1513.63												PICH	1710.12	BLM	218.824
	BLM	623.368			BLM	100.165			3418.12	748.052												PICH	1394.57	BLM	189.805
	PICH	1897.17	0.382235		PICH	5639.34	0.524768		5513.13	1736.65												PICH	1660.56	BLM	160.515
	BLM	725.163			BLM	2959.34			2649.55	897.788												PICH	3025.43	BLM	953.781
	PICH	2512.61	0.533605		PICH	5797.66	0.566847		2439.58	1117.21												PICH	2148.98	BLM	517.659
	BLM	1340.74			BLM	3286.39																PICH	3762.2	BLM	784.835
	PICH	2240.13	0.331588		PICH	5795.19	0.478415															PICH	2112.15	BLM	686.522
	BLM	742.8			BLM	2772.51																PICH	2161.55	BLM	322.682
	PICH	2950.57	0.420949		PICH	4786.05	0.916842															PICH	2163.65	BLM	472.9
	BLM	1242.04			BLM	4388.05																PICH	8738.77	BLM	1075.14
	PICH	1632.82	0.270687		PICH	3831.55	0.521101															PICH	4803.21	BLM	577.294
	BLM	441.984			BLM	1996.62																PICH	9080.2	BLM	1783.12
	PICH	2684.43	0.344472		PICH	1176.79	0.692056															PICH	5249.41	BLM	1558.46
	BLM	924.712			BLM	814.402																PICH	9814.86	BLM	947.633
	PICH	1440.48	0.64838		PICH	2205.65	0.419496															PICH	6018.84	BLM	722.561
	BLM	933.977			BLM	925.259																PICH	4850.93	BLM	79.945
	PICH	695.383	0.214378		PICH	2444.08	0.558106															PICH	5112.75	BLM	1607.62
	BLM	149.075			BLM	1364.06																PICH	5828.56	BLM	438.308
	PICH	445.938	0.253416		PICH	2526.49	0.582121															PICH	1626.74	BLM	435.639
	BLM	113.008			BLM	1470.72																PICH	359.642	BLM	0
	PICH	2046.59	0.48724		PICH	3130.51	0.724855															PICH	1344.97	BLM	162.423
	BLM	997.18			BLM	2269.16																PICH	2100.78	BLM	167.059
	PICH	2385.25	0.656755		PICH	2817.83	0.673732															PICH	1618.2	BLM	342.939
	BLM	1566.52			BLM	1898.46																PICH	2481.42	BLM	454.642
	PICH	1183.34	0.448035		PICH	3669.29	0.537491															PICH	2853.58	BLM	808.794
	BLM	530.18			BLM	1972.21																PICH	3746.3	BLM	1137.64
	PICH	2374.13	0.378797		PICH	2993.07	0.548672															PICH	2545.84	BLM	705.163
	BLM	899.314			BLM	1642.21																PICH	1460.64	BLM	357.56
	PICH	3605.02	0.493677		PICH	2600.19	0.568578															PICH	1717.62	BLM	542.712
	BLM	1779.71			BLM	1478.41																PICH	3530.01	BLM	508.31
	PICH	2650.67	0.267834		PICH	2475.42	0.640852															PICH	2442.81	BLM	488.644
	BLM	709.94			BLM	1586.38																PICH	2868.4	BLM	1568.26
	PICH	746.167	0.0211132		PICH	1721.74	0.742465															PICH	3219.27	BLM	878.278
	BLM	15.754			BLM	1278.33																PICH	3193.32	BLM	1001.99
	PICH	1459.96	0		PICH	3087.19	0.444856															PICH	3902.47	BLM	1300.91
	BLM	0			BLM	1373.35																PICH	2675.41	BLM	1186.5
	PICH	2860.21	0.164257		PICH	2251.71	0.399485															PICH	5622.29	BLM	1747.79
	BLM	469.809			BLM	899.524																PICH	5484.63	BLM	2348.73
	PICH	4207.31	0.23312		PICH	3354.51	0.364149															PICH	4848.71	BLM	1821.28
	BLM	980.806			BLM	1221.54																PICH	5226.28	BLM	2182.43
	PICH	3649.59	0.197859		PICH	1368.11	1.11154															PICH	3665.27	BLM	948.875
	BLM	722.103			BLM	1520.7																PICH	2870.24	BLM	1461.46
	PICH	7842.03	0.332203		PICH	1312.61	1.52309															PICH	5031.64	BLM	504.021
	BLM	2605.14			BLM	1999.22																PICH	4657.21	BLM	239.352
	PICH	7234.18	0.416989		PICH	4190.03	0.56329															PICH	4324.05	BLM	220.68
	BLM	3016.57			BLM	2360.2																PICH	2815.86	BLM	409.46
	PICH	5510.88	0.343247		PICH	3010.05	0.69045															PICH	4597.48	BLM	627.879
	BLM	1891.59			BLM	2078.29																PICH	6885.12	BLM	761.723
	PICH	9032.71	0.244236																			PICH	7023.44	BLM	463.804
	BLM	2206.11																				PICH	4516.48	BLM	251.325
	PICH	6056.41	0.262752																			PICH	7220.59	BLM	180.149
	BLM	1591.33																				PICH	1286.72	BLM	150.643
	PICH	5755.4	0.338595																			PICH	3629.58	BLM	497.693
	BLM	1948.75																				PICH	876.716	BLM	380.512
	PICH	7747.26	0.267627																			PICH	4091.8	BLM	834.99
	BLM	2073.38																				PICH	2593.63	BLM	634.093
	PICH	5121.49	0.296489																			PICH	4132	BLM	796.345
	BLM	1518.46																				PICH	8345.98	BLM	1788.45
	PICH	6020.86	0.251398																			PICH	9709.25	BLM	1901.26
	BLM	1513.63																				PICH	6526.89	BLM	1247.04
	PICH	3418.12	0.218849																			PICH	8390.86	BLM	1330.74
	BLM	748.052																				PICH	4908.15	BLM	1157.83
	PICH	5513.13	0.315002																			PICH	6207.94	BLM	1102.02
	BLM	1736.65																				PICH	6255.03	BLM	1338.89
	PICH	2649.55	0.338846																			PICH	6676.49	BLM	1120.99
	BLM	897.788																				PICH	5455.82	BLM	745.272
	PICH	2439.58	0.45795																			PICH	5024.97	BLM	674.43
	BLM	1117.21																				PICH	4661.77	BLM	539.81
																						PICH	3151.7	BLM	757.91
																						PICH	3975.61	BLM	546.992
																						PICH	4310.96	BLM	497.588
																						PICH	2585.13	BLM	319.785
																						PICH	3824.47	BLM	580.947
																						PICH	4922.84	BLM	370.485
																						PICH	7051.25	BLM	514.944
																						PICH	4252.73	BLM	85.519
																						PICH	2026.52	BLM	148.943
																						PICH	5097.51	BLM	256.216
																						PICH	3846.26	BLM	206.667
																						PICH	5614.74	BLM	742.509
																						PICH	4952.7	BLM	572.082
																						PICH	5352.1	BLM	813.967
																						PICH	5731.34	BLM	886.599
																						PICH	5596.26	BLM	804.958
																						PICH	3920.19	BLM	269.359
																						PICH	2501.65	BLM	92.942
																						PICH	1489.19	BLM	163.465

## Sheet: Ratio
					0.468047
	0.413847	0.186569		Early anaphase UFBs	Mid/late anaphase UFBs			Normalised by mid/late
				BLM/PICH	BLM/PICH	siSho1(BLM/PICH)		Early anaphase UFBs	Mid/late anaphase UFBs
	BLM/PICH	siSho1(BLM/PICH)	1	0.656755	0.673732	0.546737		BLM/PICH	BLM/PICH	siSho1(BLM/PICH)		BLM/PICH	siSho1(BLM/PICH)
	1.52309	0.546737	2	0.64838	0.419496	0.509178		1.40318	1.43945	1.16812		3.68032	1.32111
	1.11154	0.509178	3	0.63004	0.170073	0.450577		1.38529	0.896269	1.08788		2.68586	1.23035
	0.916842	0.450577	4	0.627668	0.0853122	0.443484		1.3461	0.363368	0.962675		2.21541	1.08875
	0.742465	0.443484	5	0.533605	0.566847	0.43402		1.34104	0.182273	0.94752		1.79406	1.07161
	0.724855	0.43402	6	0.493677	0.568578	0.428238		1.14007	1.21109	0.9273		1.7515	1.04874
	0.692056	0.428238	7	0.48724	0.724855	0.417587		1.05476	1.21479	0.914947		1.67225	1.03477
	0.69045	0.417587	8	0.45795	0.537491	0.399056		1.04101	1.54868	0.892192		1.66837	1.00904
	0.681957	0.399056	9	0.448035	0.351243	0.37882		0.978428	1.14837	0.852598		1.64785	0.964259
	0.673732	0.37882	10	0.444257	0.387207	0.375622		0.957245	0.750445	0.809363		1.62797	0.915362
	0.671773	0.375622	11	0.433406	0.916842	0.333355		0.949172	0.827283	0.802532		1.62324	0.907636
	0.656755	0.333355	12	0.420949	0.56329	0.332309		0.925989	1.95887	0.712227		1.58695	0.805504
	0.64838	0.332309	13	0.416989	0.402064	0.325034		0.899374	1.20349	0.709992		1.56672	0.802976
	0.640852	0.325034	14	0.40711	0.428749	0.31939		0.890913	0.859026	0.694448		1.54852	0.785397
	0.63004	0.31939	15	0.394221	0.393122	0.315968		0.869806	0.916038	0.682389		1.5224	0.771759
	0.627668	0.315968	16	0.387262	0.524768	0.315254		0.842268	0.839921	0.675077		1.51667	0.763489
	0.625524	0.315254	17	0.382235	0.548672	0.314434		0.8274	1.12119	0.673553		1.51149	0.761765
	0.582121	0.314434	18	0.378797	0.465874	0.313778		0.816659	1.17226	0.671801		1.40661	0.759784
	0.568578	0.313778	19	0.3694	0.625524	0.310867		0.809315	0.995357	0.670399		1.37389	0.758199
	0.566847	0.310867	20	0.363157	0.681957	0.30367		0.789237	1.33646	0.66418		1.3697	0.751165
	0.566178	0.30367	21	0.361079	0.46156	0.296884		0.775899	1.45703	0.648803		1.36809	0.733774
	0.56329	0.296884	22	0.353603	0.350998	0.283432		0.77146	0.986141	0.634304		1.36111	0.717376
	0.558106	0.283432	23	0.349785	0	0.280889		0.755487	0.749921	0.605563		1.34858	0.684871
	0.548672	0.280889	24	0.348006	0.692056	0.276986		0.747329	0	0.60013		1.32578	0.678727
	0.537491	0.276986	25	0.344472	0.69045	0.272819		0.743527	1.4786	0.591792		1.29877	0.669297
	0.533605	0.272819	26	0.343247	0.566178	0.267799		0.735978	1.47517	0.582889		1.28938	0.659228
	0.524768	0.267799	27	0.341726	1.52309	0.265824		0.73336	1.20966	0.572163		1.26802	0.647097
	0.521101	0.265824	28	0.338846	0.478415	0.260996		0.730111	3.25414	0.567943		1.25916	0.642324
	0.493677	0.260996	29	0.338595	0.336176	0.258883		0.723957	1.02215	0.557629		1.1929	0.630659
	0.48724	0.258883	30	0.332203	0.301052	0.252575		0.723421	0.718253	0.553113		1.17734	0.625552
	0.478415	0.252575	31	0.331588	0	0.24864		0.709764	0.643209	0.539636		1.15602	0.61031
	0.473966	0.24864	32	0.331405	0.172019	0.245196		0.708451	0	0.531228		1.14527	0.600801
	0.465874	0.245196	33	0.326556	0.473966	0.244796		0.70806	0.367525	0.52387		1.12571	0.592479
	0.46156	0.244796	34	0.326133	0.402765	0.244481		0.697699	1.01265	0.523016		1.11529	0.591514
	0.45795	0.244481	35	0.320401	0.363772	0.242348		0.696797	0.860524	0.522343		1.10657	0.590752
	0.448035	0.242348	36	0.315002	0	0.240886		0.68455	0.777213	0.517785		1.08261	0.585597
	0.444856	0.240886	37	0.312197	0.245952	0.240477		0.673015	0	0.514663		1.07493	0.582066
	0.444257	0.240477	38	0.311617	0.671773	0.2359		0.667022	0.525485	0.513787		1.07348	0.581076
	0.433406	0.2359	39	0.31045	0.155485	0.234694		0.665782	1.43527	0.504009		1.04726	0.570017
	0.428749	0.234694	40	0.309374	0.328531	0.218566		0.663288	0.3322	0.501433		1.03601	0.567104
	0.420949	0.218566	41	0.299351	0.217731	0.21656		0.660989	0.701919	0.466974		1.01716	0.528132
	0.419496	0.21656	42	0.297781	0.521101	0.214289		0.639575	0.46519	0.462689		1.01365	0.523286
	0.416989	0.214289	43	0.296489	0.640852	0.21405		0.636222	1.11335	0.457836		1.00759	0.517797
	0.40711	0.21405	44	0.2958	0.143088	0.212969		0.633459	1.36921	0.457327		0.983721	0.517221
	0.402064	0.212969	45	0.276538	0.582121	0.211926		0.631987	0.305714	0.455016		0.971529	0.514607
	0.399485	0.211926	46	0.273306	0.364149	0.21012		0.590834	1.24372	0.452789		0.965296	0.512088
	0.394221	0.21012	47	0.270687	0.363008	0.20861		0.58393	0.778018	0.448931		0.952577	0.507725
	0.393122	0.20861	48	0.267834	0.558106	0.204979		0.578334	0.775581	0.445704		0.949922	0.504076
	0.387262	0.204979	49	0.267627	1.11154	0.204064		0.572237	1.19242	0.437945		0.935761	0.4953
	0.387207	0.204064	50	0.264797	0.399485	0.20266		0.571795	2.37484	0.435991		0.935629	0.493091
	0.382235	0.20266	51	0.262752	0.742465	0.202054		0.565748	0.853514	0.432991		0.923614	0.489698
	0.378797	0.202054	52	0.253416	0.444856	0.200906		0.56138	1.58631	0.431697		0.915307	0.488234
	0.3694	0.200906	53	0.251398		0.200033		0.541434	0.950452	0.429242		0.8926	0.485459
	0.364149	0.200033	54	0.244236		0.197419		0.537121		0.427379		0.879912	0.483351
	0.363772	0.197419	55	0.23312		0.196375		0.52182		0.421793		0.879001	0.477034
	0.363157	0.196375	56	0.22276		0.196068		0.498069		0.419563		0.877515	0.474511
	0.363008	0.196068	57	0.218849		0.195877		0.475935		0.418907		0.877156	0.473769
	0.361079	0.195877	58	0.214378		0.195819		0.46758		0.418498		0.872495	0.473307
	0.353603	0.195819	59	0.197859		0.192726		0.458027		0.418376		0.85443	0.473169
	0.351243	0.192726	60	0.164257		0.191062		0.422733		0.411767		0.848727	0.465694
	0.350998	0.191062	61	0.0211132		0.191016		0.350941		0.408211		0.848135	0.461673
	0.349785	0.191016	62	0		0.187362		0.0451092		0.408114		0.845204	0.461562
	0.348006	0.187362	63			0.183218		0		0.400306		0.840904	0.452732
	0.344472	0.183218	64			0.182125				0.391453		0.832366	0.44272
	0.343247	0.182125	65			0.179314				0.389116		0.829405	0.440077
	0.341726	0.179314	66			0.177517				0.383111		0.825731	0.433286
	0.338846	0.177517	67			0.173546				0.379273		0.81877	0.428944
	0.338595	0.173546	68			0.169035				0.370787		0.818164	0.419348
	0.336176	0.169035	69			0.1679				0.36115		0.81232	0.408448
	0.332203	0.1679	70			0.166511				0.358726		0.802718	0.405707
	0.331588	0.166511	71			0.165825				0.355758		0.801234	0.40235
	0.331405	0.165825	72			0.162873				0.354291		0.800792	0.400691
	0.328531	0.162873	73			0.162553				0.347985		0.793846	0.393559
	0.326556	0.162553	74			0.161836				0.347301		0.789074	0.392786
	0.326133	0.161836	75			0.161538				0.34577		0.788053	0.391054
	0.320401	0.161538	76			0.158594				0.345131		0.774203	0.390332
	0.315002	0.158594	77			0.158445				0.338842		0.761157	0.383219
	0.312197	0.158445	78			0.154693				0.338524		0.754379	0.382859
	0.311617	0.154693	79			0.154568				0.330508		0.752977	0.373793
	0.31045	0.154568	80			0.153205				0.33024		0.750156	0.37349
	0.309374	0.153205	81			0.152084				0.327328		0.747556	0.370197
	0.301052	0.152084	82			0.151902				0.324933		0.727447	0.367488
	0.299351	0.151902	83			0.15106				0.324546		0.723338	0.36705
	0.297781	0.15106	84			0.149283				0.322746		0.719545	0.365015
	0.296489	0.149283	85			0.149129				0.318948		0.716421	0.36072
	0.2958	0.149129	86			0.147584				0.31862		0.714756	0.360348
	0.276538	0.147584	87			0.145412				0.31532		0.668213	0.356616
	0.273306	0.145412	88			0.14476				0.310679		0.660405	0.351367
	0.270687	0.14476	89			0.143997				0.309286		0.654076	0.349792
	0.267834	0.143997	90			0.143839				0.307655		0.647181	0.347947
	0.267627	0.143839	91			0.141677				0.307317		0.646681	0.347565
	0.264797	0.141677	92			0.140383				0.302698		0.639842	0.342341
	0.262752	0.140383	93			0.137587				0.299935		0.634902	0.339216
	0.253416	0.137587	94			0.137121				0.29396		0.612343	0.332458
	0.251398	0.137121	95			0.136601				0.292965		0.607466	0.331334
	0.244236	0.136601	96			0.13657				0.291854		0.59016	0.330077
	0.23312	0.13657	97			0.136103				0.291788		0.563299	0.330002
	0.22276	0.136103	98			0.135842				0.290789		0.538267	0.328873
	0.218849	0.135842	99			0.134216				0.290231		0.528817	0.328241
	0.214378	0.134216	100			0.132243				0.286757		0.518013	0.324312
	0.197859	0.132243	101			0.128942				0.282542		0.478096	0.319545
	0.164257	0.128942	102			0.127959				0.27549		0.396902	0.31157
	0.0211132	0.127959	103			0.127216				0.273388		0.051017	0.309193
	0	0.127216	104			0.126728				0.271802		0	0.307399
	0	0.126728	105			0.123702				0.27076		0	0.30622
	0	0.123702	106			0.123184				0.264293		0	0.298907
	0	0.123184	107			0.123031				0.263187		0	0.297656
		0.123031	108			0.120763				0.26286			0.297286
		0.120763	109			0.120189				0.258015			0.291806
		0.120189	110			0.12005				0.256789			0.290419
		0.12005	111			0.117075				0.256491			0.290083
		0.117075	112			0.115795				0.250136			0.282896
		0.115795	113			0.115509				0.247401			0.279802
		0.115509	114			0.115424				0.24679			0.279111
		0.115424	115			0.113953				0.246608			0.278905
		0.113953	116			0.111632				0.243466			0.275351
		0.111632	117			0.110633				0.238507			0.269743
		0.110633	118			0.109768				0.236372			0.267329
		0.109768	119			0.105512				0.234523			0.265237
		0.105512	120			0.10017				0.22543			0.254954
		0.10017	121			0.0984832				0.214018			0.242047
		0.0984832	122			0.0966635				0.210413			0.23797
		0.0966635	123			0.0965508				0.206525			0.233573
		0.0965508	124			0.0795224				0.206285			0.233301
		0.0795224	125			0.0769998				0.169903			0.192154
		0.0769998	126			0.0752584				0.164513			0.186059
		0.0752584	127			0.0752				0.160793			0.181851
		0.0752	128			0.073497				0.160668			0.18171
		0.073497	129			0.0730288				0.157029			0.177595
		0.0730288	130			0.0687107				0.156029			0.176463
		0.0687107	131			0.0660365				0.146803			0.166029
		0.0660365	132			0.0589509				0.14109			0.159568
		0.0589509	133			0.0556462				0.125951			0.142446
		0.0556462	134			0.0543503				0.11889			0.134461
		0.0543503	135			0.0537319				0.116121			0.131329
		0.0537319	136			0.0513938				0.1148			0.129835
		0.0513938	137			0.0510355				0.109805			0.124186
		0.0510355	138			0.050263				0.109039			0.12332
		0.050263	139			0.0371523				0.107389			0.121453
		0.0371523	140			0.0249494				0.0793773			0.0897731
		0.0249494	141			0.0201092				0.0533053			0.0602864
		0.0201092	142			0.0164804				0.042964			0.0485909
		0.0164804	143			0				0.0352109			0.0398223
		0								0			0

## Sheet: Graph
	RPE1 WT					RPE1 siSgo1
	Channel	Absolute intensity	Channel	Absolute intensity		Channel	Absolute intensity	Channel	Absolute intensity
	PICH	2173.53	BLM	1030.18		PICH	4277.91	BLM	329.398
	PICH	6150.51	BLM	2020.63		PICH	4340.74	BLM	534.709
	PICH	7683.75	BLM	3089.36		PICH	3550.89	BLM	524.055
	PICH	7486.08	BLM	2627.6		PICH	5714.23	BLM	602.919
	PICH	4639.7	BLM	1989.27		PICH	8200.35	BLM	1238.75
	PICH	6180.28	BLM	2393.05		PICH	5135.47	BLM	980.957
	PICH	4658.01	BLM	1831.17		PICH	3502.28	BLM	1397.61
	PICH	12190.5	BLM	4281.83		PICH	5905.97	BLM	1157.97
	PICH	8750.07	BLM	3176.35		PICH	4037.56	BLM	1819.23
	PICH	6185.44	BLM	2250.09		PICH	4520	BLM	1141.64
	PICH	5830.31	BLM	1755.22		PICH	4590.35	BLM	964.526
	PICH	3267.36	BLM	0		PICH	5873.83	BLM	1204.01
	PICH	4895.67	BLM	0		PICH	4981.4	BLM	721.109
	PICH	3767.57	BLM	1755.21		PICH	6176.84	BLM	782.781
	PICH	2431.63	BLM	0		PICH	3867.83	BLM	380.916
	PICH	5762.26	BLM	3262.46		PICH	4594.79	BLM	710.206
	PICH	3932.47	BLM	2459.85		PICH	3893	BLM	1243.39
	PICH	7014.41	BLM	3237.57		PICH	4209.75	BLM	1032.21
	PICH	5429.88	BLM	3702.95		PICH	5005.68	BLM	1306.47
	PICH	5834.1	BLM	1961.29		PICH	5181.35	BLM	1216.03
	PICH	11882.6	BLM	7982.39		PICH	4994.33	BLM	1891.95
	PICH	4059.71	BLM	1267.43		PICH	3646.54	BLM	1024.27
	PICH	6153.87	BLM	1701.78		PICH	4217.11	BLM	702.197
	PICH	4182.11	BLM	1702.58		PICH	1923.28	BLM	388.606
	PICH	4504.21	BLM	1575.5		PICH	3163.63	BLM	619.681
	PICH	7430.75	BLM	2929.36		PICH	3640.14	BLM	737.712
	PICH	4842.29	BLM	2098.68		PICH	2134.56	BLM	347.662
	PICH	3394.02	BLM	1314.38		PICH	1678.51	BLM	357.469
	PICH	3613.6	BLM	1605.36		PICH	4063.63	BLM	552.011
	PICH	4986.09	BLM	1110.7		PICH	2048.02	BLM	346.186
	PICH	6726.34	BLM	2088.19		PICH	2591.85	BLM	421.314
	PICH	5816.95	BLM	1899.56		PICH	3244.87	BLM	418.401
	PICH	5760.61	BLM	1782.18		PICH	3432.54	BLM	625.15
	PICH	8773.73	BLM	3053.31		PICH	1877.39	BLM	287.626
	PICH	4414.15	BLM	1630.59		PICH	938.082	BLM	50.985
	PICH	6139.67	BLM	2002.35		PICH	2859.06	BLM	363.718
	PICH	6661.76	BLM	2276.5		PICH	3451.2	BLM	546.825
	PICH	5806.15	BLM	2108.54		PICH	2895.24	BLM	329.922
	PICH	9037.2	BLM	3195.58		PICH	3426.72	BLM	382.533
	PICH	7024.23	BLM	2536.3		PICH	4988.38	BLM	1657.68
	PICH	6951.45	BLM	2303.74		PICH	3595.82	BLM	580.861
	PICH	7083.19	BLM	2109.24		PICH	5466.78	BLM	1324.86
	PICH	8184.97	BLM	2550.58		PICH	8134.75	BLM	2022.62
	PICH	8475.01	BLM	2506.9		PICH	6338.71	BLM	889.85
	PICH	6799.62	BLM	2178.61		PICH	4602.28	BLM	763.171
	PICH	7408.86	BLM	1961.84		PICH	5721.19	BLM	337.269
	PICH	4991.86	BLM	1364.31		PICH	5287.08	BLM	749.056
	PICH	4468.27	BLM	1337.58		PICH	5204.5	BLM	842.277
	PICH	5639.34	BLM	2959.34		PICH	6224.77	BLM	1228.89
	PICH	5797.66	BLM	3286.39		PICH	7595.95	BLM	1318.25
	PICH	5795.19	BLM	2772.51		PICH	9349.3	BLM	2485.26
	PICH	4786.05	BLM	4388.05		PICH	3802.52	BLM	763.947
	PICH	3831.55	BLM	1996.62		PICH	4917.3	BLM	1064.89
	PICH	2213.62	BLM	1394.67		PICH	5809.11	BLM	1088.41
	PICH	993.149	BLM	623.368		PICH	5397.71	BLM	967.885
	PICH	1897.17	BLM	725.163		PICH	1950.18	BLM	290.829
	PICH	2512.61	BLM	1340.74		PICH	1710.12	BLM	218.824
	PICH	2240.13	BLM	742.8		PICH	1394.57	BLM	189.805
	PICH	2950.57	BLM	1242.04		PICH	1660.56	BLM	160.515
	PICH	1632.82	BLM	441.984		PICH	3025.43	BLM	953.781
	PICH	2684.43	BLM	924.712		PICH	2148.98	BLM	517.659
	PICH	1440.48	BLM	933.977		PICH	3762.2	BLM	784.835
	PICH	1176.79	BLM	814.402		PICH	2112.15	BLM	686.522
	PICH	2205.65	BLM	925.259		PICH	2161.55	BLM	322.682
	PICH	2444.08	BLM	1364.06		PICH	2163.65	BLM	472.9
	PICH	2526.49	BLM	1470.72		PICH	8738.77	BLM	1075.14
	PICH	3130.51	BLM	2269.16		PICH	4803.21	BLM	577.294
	PICH	2817.83	BLM	1898.46		PICH	9080.2	BLM	1783.12
	PICH	3669.29	BLM	1972.21		PICH	5249.41	BLM	1558.46
	PICH	2993.07	BLM	1642.21		PICH	9814.86	BLM	947.633
	PICH	2600.19	BLM	1478.41		PICH	6018.84	BLM	722.561
	PICH	2475.42	BLM	1586.38		PICH	4850.93	BLM	79.945
	PICH	1721.74	BLM	1278.33		PICH	5112.75	BLM	1607.62
	PICH	3087.19	BLM	1373.35		PICH	5828.56	BLM	438.308
	PICH	2251.71	BLM	899.524		PICH	1626.74	BLM	435.639
	PICH	3354.51	BLM	1221.54		PICH	359.642	BLM	0
	PICH	1368.11	BLM	1520.7		PICH	1344.97	BLM	162.423
	PICH	1312.61	BLM	1999.22		PICH	2100.78	BLM	167.059
	PICH	695.383	BLM	149.075		PICH	1618.2	BLM	342.939
	PICH	445.938	BLM	113.008		PICH	2481.42	BLM	454.642
	PICH	2046.59	BLM	997.18		PICH	2853.58	BLM	808.794
	PICH	2385.25	BLM	1566.52		PICH	3746.3	BLM	1137.64
	PICH	1183.34	BLM	530.18		PICH	2545.84	BLM	705.163
	PICH	2374.13	BLM	899.314		PICH	1460.64	BLM	357.56
	PICH	3605.02	BLM	1779.71		PICH	1717.62	BLM	542.712
	PICH	2650.67	BLM	709.94		PICH	3530.01	BLM	508.31
	PICH	746.167	BLM	15.754		PICH	2442.81	BLM	488.644
	PICH	1459.96	BLM	0		PICH	2868.4	BLM	1568.26
	PICH	2860.21	BLM	469.809		PICH	3219.27	BLM	878.278
	PICH	4207.31	BLM	980.806		PICH	3193.32	BLM	1001.99
	PICH	3649.59	BLM	722.103		PICH	3902.47	BLM	1300.91
	PICH	7842.03	BLM	2605.14		PICH	2675.41	BLM	1186.5
	PICH	7234.18	BLM	3016.57		PICH	5622.29	BLM	1747.79
	PICH	5510.88	BLM	1891.59		PICH	5484.63	BLM	2348.73
	PICH	9032.71	BLM	2206.11		PICH	4848.71	BLM	1821.28
	PICH	6056.41	BLM	1591.33		PICH	5226.28	BLM	2182.43
	PICH	5755.4	BLM	1948.75		PICH	3665.27	BLM	948.875
	PICH	7747.26	BLM	2073.38		PICH	2870.24	BLM	1461.46
	PICH	5121.49	BLM	1518.46		PICH	5031.64	BLM	504.021
	PICH	6020.86	BLM	1513.63		PICH	4657.21	BLM	239.352
	PICH	3418.12	BLM	748.052		PICH	4324.05	BLM	220.68
	PICH	5513.13	BLM	1736.65		PICH	2815.86	BLM	409.46
	PICH	2649.55	BLM	897.788		PICH	4597.48	BLM	627.879
	PICH	2439.58	BLM	1117.21		PICH	6885.12	BLM	761.723
	PICH	4190.03	BLM	2360.2		PICH	7023.44	BLM	463.804
	PICH	3010.05	BLM	2078.29		PICH	4516.48	BLM	251.325
						PICH	7220.59	BLM	180.149
						PICH	1286.72	BLM	150.643
						PICH	3629.58	BLM	497.693
						PICH	876.716	BLM	380.512
						PICH	4091.8	BLM	834.99
						PICH	2593.63	BLM	634.093
						PICH	4132	BLM	796.345
						PICH	8345.98	BLM	1788.45
						PICH	9709.25	BLM	1901.26
						PICH	6526.89	BLM	1247.04
						PICH	8390.86	BLM	1330.74
						PICH	4908.15	BLM	1157.83
						PICH	6207.94	BLM	1102.02
						PICH	6255.03	BLM	1338.89
						PICH	6676.49	BLM	1120.99
						PICH	5455.82	BLM	745.272
						PICH	5024.97	BLM	674.43
						PICH	4661.77	BLM	539.81
						PICH	3151.7	BLM	757.91
						PICH	3975.61	BLM	546.992
						PICH	4310.96	BLM	497.588
						PICH	2585.13	BLM	319.785
						PICH	3824.47	BLM	580.947
						PICH	4922.84	BLM	370.485
						PICH	7051.25	BLM	514.944
						PICH	4252.73	BLM	85.519
						PICH	2026.52	BLM	148.943
						PICH	5097.51	BLM	256.216
						PICH	3846.26	BLM	206.667
						PICH	5614.74	BLM	742.509
						PICH	4952.7	BLM	572.082
						PICH	5352.1	BLM	813.967
						PICH	5731.34	BLM	886.599
						PICH	5596.26	BLM	804.958
						PICH	3920.19	BLM	269.359
						PICH	2501.65	BLM	92.942
						PICH	1489.19	BLM	163.465
