# Supplementary material for: Centromere protection requires strict mitotic inactivation of the Bloom syndrome helicase complex
Source: Research Square preprint supplement (doi:10.21203/rs.3.rs-4420374/v1), 2024-05-30
Supplement: Supplementary file 37 [file Fig S2B. AlphaFold_pLDDT.xlsx]

## Sheet: Sheet1
	0	27.8999		0	1	2	3	4	5	6	7	8	9	10	11	12	13	14	15	16	17	18	19	20	21	22	23	24	25	26	27	28	29	30	31	32	33	34	35	36	37	38	39	40	41	42	43	44	45
	1	39.6828		27.8999	39.6828	51.1355	67.4122	80.3453	83.9128	82.0642	81.4291	84.8715	83.8477	82.4543	82.7167	86.2322	78.2703	76.2118	79.0071	74.5969	66.2636	60.2588	56.4973	44.8086	43.2811	42.0706	36.8916	31.9437	35.3087	33.0726	35.0056	41.4596	35.3277	40.7173	40.9527	45.3826	54.0918	62.1027	61.7338	72.1247	61.1437	48.9689	44.0577	34.3893	27.5218	26.3447	21.1204	21.0345	19.6315
	2	51.1355
	3	67.4122
	4	80.3453
	5	83.9128
	6	82.0642
	7	81.4291
	8	84.8715
	9	83.8477
	10	82.4543
	11	82.7167
	12	86.2322
	13	78.2703
	14	76.2118
	15	79.0071
	16	74.5969
	17	66.2636
	18	60.2588
	19	56.4973
	20	44.8086
	21	43.2811
	22	42.0706
	23	36.8916
	24	31.9437
	25	35.3087
	26	33.0726
	27	35.0056
	28	41.4596
	29	35.3277
	30	40.7173
	31	40.9527
	32	45.3826
	33	54.0918
	34	62.1027
	35	61.7338
	36	72.1247
	37	61.1437
	38	48.9689
	39	44.0577
	40	34.3893
	41	27.5218
	42	26.3447
	43	21.1204
	44	21.0345
	45	19.6315
	46	16.4831
	47	17.0269
	48	15.6104
	49	14.9421
	50	15.0593
	51	14.9741
	52	14.7135
	53	14.3958
	54	14.5718
	55	13.8481
	56	14.1367
	57	14.6116
	58	14.9171
	59	14.4714
	60	15.0649
	61	14.5381
	62	13.5764
	63	13.7161
	64	20.2605
	65	13.1608
	66	15.2903
	67	12.975
	68	13.5344
	69	13.5432
	70	13.289
	71	13.7501
	72	13.6301
	73	13.3505
	74	14.2063
	75	14.5895
	76	13.6308
	77	13.5551
	78	13.2089
	79	13.7015
	80	14.1182
	81	13.3828
	82	14.9239
	83	14.5238
	84	14.4655
	85	14.848
	86	14.8064
	87	14.0369
	88	14.367
	89	14.9315
	90	14.462
	91	14.6914
	92	14.8635
	93	14.8503
	94	14.6496
	95	14.6391
	96	14.6011
	97	14.0364
	98	13.8533
	99	13.5197
	100	13.4269
	101	13.4216
	102	14.039
	103	14.2321
	104	14.3216
	105	14.4155
	106	14.2683
	107	14.5906
	108	14.0079
	109	14.0567
	110	13.6245
	111	13.6383
	112	13.2002
	113	13.3897
	114	13.4581
	115	13.2808
	116	13.1235
	117	13.5988
	118	12.6179
	119	13.3124
	120	13.1557
	121	14.3032
	122	14.3643
	123	13.9274
	124	13.6819
	125	14.9836
	126	13.9081
	127	14.3743
	128	14.645
	129	14.4445
	130	14.6149
	131	12.755
	132	14.8177
	133	14.3092
	134	13.6482
	135	14.1541
	136	14.0975
	137	12.7867
	138	13.556
	139	12.7219
	140	14.6476
	141	13.7756
	142	12.3889
	143	13.8782
	144	15.1253
	145	13.7684
	146	14.3098
	147	13.7821
	148	13.6241
	149	13.3325
	150	14.2405
	151	14.6911
	152	14.3507
	153	14.5283
	154	15.8181
	155	14.8486
	156	14.2113
	157	19.8886
	158	19.8051
	159	15.7429
	160	13.6745
	161	19.3673
	162	13.3339
	163	13.2424
	164	12.891
	165	13.5556
	166	13.3004
	167	13.008
	168	13.139
	169	12.8261
	170	13.1772
	171	13.3548
	172	13.4316
	173	13.4859
	174	13.4508
	175	14.3203
	176	13.6101
	177	14.1901
	178	14.3329
	179	13.7926
	180	13.9812
	181	14.3572
	182	13.3728
	183	14.4179
	184	13.4442
	185	14.2071
	186	13.517
	187	14.2224
	188	13.7717
	189	13.8894
	190	14.0945
	191	13.8744
	192	14.3741
	193	14.2368
	194	14.3842
	195	13.7838
	196	14.4814
	197	14.5477
	198	14.3358
	199	14.4172
	200	14.4315
	201	14.2341
	202	14.4228
	203	14.054
	204	14.6234
	205	13.9826
	206	14.3531
	207	14.0217
	208	14.5297
	209	14.9418
	210	14.6865
	211	14.2539
	212	14.5511
	213	14.5345
	214	14.7225
	215	14.9908
	216	15.8433
	217	14.2358
	218	15.7079
	219	14.4754
	220	16.6808
	221	14.4488
	222	16.4103
	223	16.5849
	224	16.3834
	225	17.0014
	226	16.8532
	227	18.0369
	228	19.4714
	229	18.6342
	230	20.9676
	231	21.8839
	232	25.0342
	233	28.2356
	234	31.9085
	235	34.2983
	236	33.4347
	237	30.4847
	238	27.0669
	239	23.7358
	240	20.4404
	241	18.1469
	242	18.8727
	243	16.0688
	244	15.9869
	245	17.3136
	246	15.6742
	247	16.2798
	248	14.5107
	249	15.4625
	250	14.5039
	251	14.5662
	252	14.378
	253	14.0247
	254	14.0443
	255	14.0632
	256	13.919
	257	13.5544
	258	13.6709
	259	13.3828
	260	13.4546
	261	13.6588
	262	13.3321
	263	13.7785
	264	14.0788
	265	14.432
	266	13.943
	267	14.0742
	268	14.1423
	269	14.2691
	270	14.6203
	271	14.3677
	272	14.204
	273	14.1209
	274	13.8189
	275	14.2951
	276	13.9162
	277	13.6546
	278	13.8412
	279	13.6264
	280	13.6347
	281	13.688
	282	13.8101
	283	13.9305
	284	14.0443
	285	13.7779
	286	13.9453
	287	13.8059
	288	13.9295
	289	14.4085
	290	14.689
	291	14.3732
	292	14.403
	293	14.6413
	294	14.2273
	295	15.1065
	296	14.0307
	297	15.4256
	298	14.5162
	299	14.979
	300	14.5264
	301	15.3766
	302	15.2413
	303	14.4361
	304	15.0448
	305	14.7073
	306	14.5144
	307	14.2683
	308	13.8766
	309	14.0055
	310	13.6718
	311	13.7866
	312	13.5751
	313	13.6443
	314	13.6297
	315	13.7042
	316	14.0654
	317	13.265
	318	13.757
	319	13.334
	320	14.1971
	321	12.9517
	322	14.1847
	323	14.0783
	324	13.6091
	325	13.6536
	326	14.137
	327	13.5442
	328	13.7536
	329	13.8192
	330	13.602
	331	13.9122
	332	13.5181
	333	13.9308
	334	13.0218
	335	13.6832
	336	13.6626
	337	13.5641
	338	13.9292
	339	13.6607
	340	13.9627
	341	14.0286
	342	13.0158
	343	13.8224
	344	14.6482
	345	13.6198
	346	14.4467
	347	13.7876
	348	13.5604
	349	13.6311
	350	14.3789
	351	14.1018
	352	14.0619
	353	13.8406
	354	14.445
	355	14.2734
	356	14.2769
	357	14.883
	358	14.5113
	359	14.8161
	360	15.0196
	361	16.8679
	362	15.6461
	363	17.8603
	364	19.8935
	365	20.4612
	366	23.1167
	367	26.7902
	368	26.6316
	369	31.7027
	370	34.5951
	371	34.8479
	372	43.6078
	373	46.0328
	374	45.667
	375	47.2402
	376	47.9244
	377	50.4251
	378	46.8624
	379	50.2107
	380	51.5787
	381	51.7003
	382	54.3854
	383	52.1662
	384	51.509
	385	49.4163
	386	57.2887
	387	47.3359
	388	47.3545
	389	48.3404
	390	48.8808
	391	46.6478
	392	45.2561
	393	40.8037
	394	47.7992
	395	44.9442
	396	46.5496
	397	53.1871
	398	53.5655
	399	55.1442
	400	58.028
	401	57.8592
	402	58.7411
	403	57.9689
	404	55.0474
	405	53.527
	406	51.8289
	407	49.3885
	408	46.6356
	409	43.1034
	410	40.4012
	411	36.8944
	412	31.5182
	413	29.04
	414	21.5225
	415	24.3249
	416	19.1903
	417	20.2138
	418	18.8814
	419	18.673
	420	18.8681
	421	18.3885
	422	17.1539
	423	16.486
	424	15.7696
	425	15.902
	426	16.9139
	427	16.6709
	428	15.1642
	429	13.8166
	430	14.1747
	431	13.1014
	432	13.8903
	433	13.8771
	434	14.4005
	435	13.0715
	436	14.4969
	437	14.6843
	438	14.192
	439	14.4577
	440	14.2535
	441	14.1443
	442	13.9591
	443	14.3979
	444	13.7939
	445	13.5489
	446	13.9597
	447	13.8902
	448	13.3954
	449	13.9523
	450	13.9581
	451	13.4426
	452	13.4933
	453	13.2249
	454	13.8271
	455	13.206
	456	13.6732
	457	13.9025
	458	13.9692
	459	14.0274
	460	14.2008
	461	14.3827
	462	14.7696
	463	14.0012
	464	14.8758
	465	14.4595
	466	14.9015
	467	14.3946
	468	14.3209
	469	13.979
	470	14.1567
	471	14.2721
	472	14.407
	473	14.543
	474	14.3638
	475	14.7327
	476	14.4609
	477	14.3814
	478	14.4521
	479	14.1539
	480	13.9028
	481	14.233
	482	14.3522
	483	14.2945
	484	14.035
	485	14.202
	486	14.2169
	487	14.3746
	488	14.4814
	489	14.6044
	490	14.3511
	491	13.8147
	492	14.1047
	493	13.9755
	494	14.4355
	495	14.1013
	496	13.9772
	497	14.0715
	498	13.7825
	499	14.1701
	500	14.1251
	501	13.7742
	502	13.9408
	503	14.1229
	504	14.2816
	505	14.1301
	506	13.9067
	507	13.4721
	508	13.489
	509	13.3917
	510	13.4748
	511	13.1266
	512	13.5468
	513	13.4367
	514	14.4766
	515	12.4443
	516	13.9177
	517	12.98
	518	13.1157
	519	13.17
	520	14.1046
	521	13.2379
	522	13.547
	523	13.9429
	524	13.7654
	525	12.3685
	526	13.2648
	527	12.7646
	528	13.3596
	529	14.2955
	530	12.3031
	531	13.8585
	532	12.3399
	533	14.6153
	534	13.4209
	535	12.9484
	536	13.4607
	537	13.4673
	538	13.5353
	539	13.4624
	540	13.9162
	541	13.9917
	542	14.5277
	543	14.8631
	544	14.626
	545	14.4052
	546	14.9369
	547	14.489
	548	14.8847
	549	14.6405
	550	14.4351
	551	14.8573
	552	14.2631
	553	14.6651
	554	14.5171
	555	14.4999
	556	14.2951
	557	14.2818
	558	14.5812
	559	14.9916
	560	15.05
	561	15.1825
	562	14.4572
	563	15.9368
	564	15.3206
	565	15.3845
	566	15.9387
	567	14.6859
	568	14.1925
	569	13.7362
	570	13.4291
	571	13.399
	572	12.7478
	573	13.0926
	574	12.9049
	575	12.883
	576	12.8275
	577	13.442
	578	13.0902
	579	13.1872
	580	13.6188
	581	13.1952
	582	13.3623
	583	13.9434
	584	13.261
	585	14.7693
	586	13.9596
	587	13.7543
	588	14.5518
	589	14.8716
	590	14.3736
	591	15.5619
	592	13.7119
	593	14.6078
	594	14.8766
	595	14.1288
	596	14.6285
	597	14.3387
	598	14.0804
	599	14.5956
	600	13.8374
	601	13.7826
	602	13.72
	603	14.3441
	604	14.5208
	605	13.1571
	606	14.492
	607	13.9216
	608	14.8714
	609	15.4063
	610	14.7984
	611	13.4274
	612	14.8787
	613	13.6706
	614	14.8554
	615	15.8699
	616	14.3438
	617	15.8868
	618	13.8708
	619	16.1374
	620	14.5962
	621	15.9497
	622	16.6753
	623	15.9425
	624	16.8465
	625	15.3545
	626	17.1777
	627	18.4751
	628	17.8083
	629	19.0612
	630	21.2547
	631	20.6453
	632	21.9344
	633	25.7158
	634	26.9671
	635	33.5981
	636	37.7677
	637	44.7582
	638	51.4887
	639	63.9904
	640	78.9562
	641	81.5427
	642	86.5014
	643	91.4516
	644	89.5598
	645	88.0135
	646	88.756
	647	88.6347
	648	92.2728
	649	90.9103
	650	94.3007
	651	92.8827
	652	90.3448
	653	92.0611
	654	94.7168
	655	91.6203
	656	88.715
	657	90.7351
	658	90.3262
	659	82.9224
	660	80.5769
	661	82.4711
	662	87.1155
	663	81.6292
	664	82.2143
	665	80.3649
	666	82.3501
	667	88.3625
	668	85.2524
	669	85.6261
	670	89.5599
	671	91.915
	672	93.5801
	673	93.5558
	674	95.287
	675	96.0681
	676	95.2194
	677	95.4449
	678	95.6954
	679	95.3229
	680	94.0134
	681	92.4781
	682	93.5863
	683	94.7392
	684	95.0407
	685	94.2328
	686	92.5995
	687	88.3779
	688	85.7442
	689	80.6901
	690	74.2165
	691	73.5412
	692	78.4218
	693	82.6985
	694	87.8147
	695	89.0194
	696	91.9108
	697	93.8967
	698	95.3522
	699	95.6805
	700	95.0665
	701	96.0292
	702	96.5389
	703	94.506
	704	94.7915
	705	93.9411
	706	92.7221
	707	93.3518
	708	96.2233
	709	96.8298
	710	96.7822
	711	95.6128
	712	94.6898
	713	89.2872
	714	81.9589
	715	71.9962
	716	71.1913
	717	68.7819
	718	74.1182
	719	83.0587
	720	76.6723
	721	73.7233
	722	83.7959
	723	87.5796
	724	80.0788
	725	79.3421
	726	87.6916
	727	83.2303
	728	76.08
	729	81.8867
	730	82.9813
	731	89.5932
	732	92.2398
	733	94.8013
	734	93.3754
	735	92.6785
	736	90.3421
	737	84.2013
	738	72.4975
	739	66.8102
	740	74.1929
	741	72.5781
	742	72.3758
	743	72.8733
	744	80.4778
	745	84.1243
	746	79.2669
	747	79.2852
	748	87.5368
	749	86.559
	750	80.5532
	751	84.1768
	752	88.1627
	753	81.361
	754	79.3365
	755	78.4429
	756	78.9282
	757	88.5996
	758	86.0211
	759	92.8941
	760	94.6376
	761	96.2752
	762	95.9501
	763	94.6533
	764	94.1342
	765	89.7852
	766	88.6544
	767	84.428
	768	82.7759
	769	87.4745
	770	80.3437
	771	79.3065
	772	81.4047
	773	80.8479
	774	79.3246
	775	89.2185
	776	86.9775
	777	85.4743
	778	88.339
	779	92.0476
	780	87.7603
	781	86.8164
	782	90.03
	783	91.1178
	784	85.624
	785	87.879
	786	89.8372
	787	92.8792
	788	94.6865
	789	95.0772
	790	93.6398
	791	96.1314
	792	95.9205
	793	94.8946
	794	90.226
	795	87.5729
	796	89.7633
	797	86.0198
	798	83.3964
	799	84.4542
	800	79.382
	801	70.8114
	802	64.0406
	803	68.3837
	804	68.6031
	805	71.9981
	806	77.8919
	807	74.5702
	808	75.5969
	809	83.5627
	810	86.9235
	811	78.9797
	812	81.5937
	813	87.174
	814	83.5562
	815	86.0387
	816	87.2904
	817	81.5994
	818	83.9258
	819	86.9747
	820	92.0673
	821	88.8849
	822	90.0546
	823	93.3328
	824	94.508
	825	95.8381
	826	95.3508
	827	94.7616
	828	92.2596
	829	86.8552
	830	75.0637
	831	70.9564
	832	68.8401
	833	71.6415
	834	73.2095
	835	73.3615
	836	77.6395
	837	82.3492
	838	78.0915
	839	80.5277
	840	86.256
	841	85.9199
	842	81.5291
	843	80.9005
	844	87.4959
	845	81.8289
	846	86.2706
	847	79.5595
	848	80.5913
	849	88.9815
	850	90.9533
	851	89.0713
	852	90.3766
	853	83.9719
	854	81.0784
	855	82.9871
	856	81.8618
	857	88.1908
	858	86.9147
	859	89.6607
	860	91.1031
	861	94.0918
	862	94.4461
	863	95.344
	864	94.9604
	865	93.4588
	866	90.8915
	867	89.0973
	868	88.4475
	869	82.1976
	870	80.2278
	871	75.7777
	872	83.535
	873	88.5108
	874	91.542
	875	89.172
	876	91.8865
	877	93.1508
	878	91.7886
	879	90.6071
	880	92.6737
	881	93.8143
	882	90.0202
	883	89.8327
	884	90.8868
	885	91.8834
	886	88.5652
	887	88.1073
	888	90.4329
	889	92.1561
	890	94.636
	891	94.2783
	892	94.7703
	893	92.574
	894	90.9287
	895	82.317
	896	82.5435
	897	81.2956
	898	81.6868
	899	88.154
	900	90.7978
	901	88.6442
	902	88.8513
	903	91.8949
	904	93.1521
	905	88.2791
	906	89.3198
	907	92.0349
	908	87.017
	909	84.6419
	910	85.9818
	911	85.3528
	912	87.8636
	913	92.7831
	914	93.5517
	915	93.8967
	916	92.5854
	917	88.8548
	918	82.4117
	919	66.4679
	920	68.4335
	921	73.0115
	922	72.5157
	923	65.039
	924	71.7085
	925	78.8499
	926	78.5997
	927	75.1288
	928	79.6479
	929	86.0098
	930	81.7408
	931	78.5756
	932	86.0042
	933	89.6336
	934	83.9897
	935	81.2712
	936	86.8305
	937	84.8872
	938	86.2394
	939	91.2087
	940	93.227
	941	94.587
	942	92.9525
	943	94.1281
	944	90.039
	945	86.3794
	946	73.7631
	947	69.6764
	948	77.17
	949	69.8455
	950	64.0442
	951	59.5833
	952	67.2316
	953	70.9272
	954	76.9727
	955	81.009
	956	87.2258
	957	90.9484
	958	92.4158
	959	94.8332
	960	95.1924
	961	95.4344
	962	95.3755
	963	94.3188
	964	91.8425
	965	91.322
	966	91.1202
	967	84.0598
	968	86.2874
	969	88.504
	970	80.8439
	971	80.7241
	972	92.0947
	973	87.8905
	974	80.0357
	975	86.0805
	976	90.5315
	977	87.3551
	978	83.9916
	979	90.6398
	980	89.0912
	981	77.7534
	982	77.4093
	983	80.6601
	984	82.6721
	985	92.1857
	986	94.9747
	987	96.2486
	988	96.0886
	989	95.0511
	990	95.3927
	991	93.5684
	992	92.8399
	993	87.4143
	994	83.4701
	995	80.6628
	996	87.8733
	997	86.2076
	998	80.542
	999	80.0951
	1000	81.6525
	1001	78.5241
	1002	75.9002
	1003	72.3186
	1004	75.4548
	1005	68.9439
	1006	61.2132
	1007	58.5839
	1008	48.7528
	1009	48.0747
	1010	50.0819
	1011	52.8708
	1012	58.8039
	1013	58.5867
	1014	64.0989
	1015	73.8249
	1016	70.0273
	1017	70.5947
	1018	78.0375
	1019	80.1318
	1020	75.5094
	1021	79.2113
	1022	86.5615
	1023	84.676
	1024	83.8383
	1025	90.2836
	1026	90.6374
	1027	86.5077
	1028	92.0983
	1029	91.5836
	1030	85.7301
	1031	85.529
	1032	85.234
	1033	82.2202
	1034	84.5167
	1035	89.0719
	1036	92.9076
	1037	92.7112
	1038	89.1709
	1039	88.1364
	1040	88.3723
	1041	86.6513
	1042	83.1533
	1043	80.7006
	1044	75.7465
	1045	71.3852
	1046	77.2554
	1047	69.5489
	1048	73.1534
	1049	84.4004
	1050	86.7121
	1051	84.5186
	1052	87.1281
	1053	91.0448
	1054	91.3058
	1055	87.8642
	1056	90.0402
	1057	91.19
	1058	88.5362
	1059	88.9694
	1060	92.9209
	1061	93.2669
	1062	93.5059
	1063	90.4446
	1064	87.6882
	1065	88.0199
	1066	82.0058
	1067	72.2614
	1068	61.3381
	1069	61.2471
	1070	65.026
	1071	72.3137
	1072	73.7814
	1073	80.4966
	1074	83.5511
	1075	86.8545
	1076	91.2012
	1077	91.147
	1078	88.394
	1079	91.4764
	1080	93.8881
	1081	90.9234
	1082	91.5439
	1083	93.2222
	1084	91.9587
	1085	88.3323
	1086	88.8211
	1087	88.1583
	1088	83.055
	1089	78.6268
	1090	73.825
	1091	66.2703
	1092	51.9939
	1093	41.4175
	1094	39.1246
	1095	33.8042
	1096	31.7216
	1097	30.254
	1098	28.6579
	1099	31.7071
	1100	30.3395
	1101	28.9524
	1102	32.1704
	1103	33.4589
	1104	42.0055
	1105	40.4399
	1106	53.8032
	1107	65.9883
	1108	81.7677
	1109	84.4833
	1110	87.6067
	1111	82.9257
	1112	85.8694
	1113	88.9139
	1114	90.7792
	1115	87.963
	1116	89.0094
	1117	92.6499
	1118	89.7147
	1119	85.9056
	1120	81.03
	1121	75.7633
	1122	76.8831
	1123	80.0395
	1124	75.654
	1125	77.689
	1126	81.9741
	1127	79.7086
	1128	83.6335
	1129	88.3579
	1130	90.571
	1131	86.8984
	1132	88.7139
	1133	88.5422
	1134	86.489
	1135	84.1369
	1136	87.8478
	1137	82.7252
	1138	80.8836
	1139	78.0195
	1140	84.7051
	1141	88.3158
	1142	86.4789
	1143	84.5502
	1144	89.2022
	1145	90.2843
	1146	86.8161
	1147	87.2516
	1148	90.5012
	1149	86.9457
	1150	80.417
	1151	87.7383
	1152	86.9996
	1153	90.0613
	1154	88.1647
	1155	85.6965
	1156	79.9531
	1157	74.7318
	1158	69.1414
	1159	65.3175
	1160	58.0418
	1161	56.9582
	1162	53.712
	1163	50.4429
	1164	54.7261
	1165	56.1531
	1166	65.4228
	1167	66.9878
	1168	76.6144
	1169	79.937
	1170	86.0075
	1171	83.8368
	1172	87.0427
	1173	87.1024
	1174	83.4015
	1175	88.4994
	1176	89.6569
	1177	87.7611
	1178	89.3621
	1179	90.0463
	1180	88.9698
	1181	85.7081
	1182	80.3157
	1183	84.8202
	1184	86.2066
	1185	87.9209
	1186	89.2205
	1187	88.8335
	1188	88.8558
	1189	81.0296
	1190	79.9678
	1191	75.6339
	1192	64.6826
	1193	54.1962
	1194	47.1579
	1195	42.8523
	1196	39.8986
	1197	38.4781
	1198	33.3694
	1199	33.9361
	1200	32.8948
	1201	30.945
	1202	36.7386
	1203	34.3229
	1204	40.1187
	1205	44.0403
	1206	46.97
	1207	58.9887
	1208	71.5111
	1209	68.9354
	1210	76.7074
	1211	79.9959
	1212	78.8221
	1213	81.4828
	1214	87.5729
	1215	83.0677
	1216	85.5173
	1217	87.613
	1218	89.4474
	1219	87.6214
	1220	87.572
	1221	90.0007
	1222	88.8367
	1223	87.0742
	1224	89.1648
	1225	88.532
	1226	84.7758
	1227	85.3594
	1228	80.7623
	1229	79.5796
	1230	76.736
	1231	75.3905
	1232	69.2121
	1233	71.2975
	1234	74.8357
	1235	80.1813
	1236	79.9609
	1237	79.145
	1238	76.0441
	1239	81.1426
	1240	84.682
	1241	80.9022
	1242	81.1462
	1243	82.5369
	1244	86.8396
	1245	88.6349
	1246	87.1857
	1247	88.316
	1248	88.5969
	1249	89.8308
	1250	88.4867
	1251	89.2798
	1252	88.3345
	1253	89.4449
	1254	87.9767
	1255	85.1227
	1256	86.2148
	1257	81.4888
	1258	87.9689
	1259	88.2899
	1260	84.8338
	1261	82.4007
	1262	84.7011
	1263	80.5712
	1264	81.7111
	1265	86.4674
	1266	83.235
	1267	78.2309
	1268	76.6093
	1269	80.651
	1270	82.8282
	1271	79.1928
	1272	80.4968
	1273	86.0704
	1274	85.4241
	1275	84.921
	1276	87.9312
	1277	91.3022
	1278	89.4372
	1279	89.7117
	1280	91.0282
	1281	90.589
	1282	88.413
	1283	87.7212
	1284	89.0408
	1285	82.0308
	1286	80.7235
	1287	77.9405
	1288	74.0107
	1289	66.2327
	1290	52.9415
	1291	34.22
	1292	30.4362
	1293	24.502
	1294	23.0749
	1295	20.6607
	1296	18.4382
	1297	18.6163
	1298	16.6979
	1299	15.6754
	1300	15.8026
	1301	14.7946
	1302	14.9356
	1303	14.6219
	1304	14.9756
	1305	14.1537
	1306	15.2152
	1307	14.2398
	1308	14.7098
	1309	14.272
	1310	13.8411
	1311	13.8191
	1312	14.2575
	1313	13.13
	1314	14.4512
	1315	13.5056
	1316	13.5993
	1317	14.2606
	1318	13.9322
	1319	14.2197
	1320	14.4766
	1321	13.4011
	1322	13.8826
	1323	13.1866
	1324	13.7885
	1325	13.3098
	1326	12.4401
	1327	13.4736
	1328	13.228
	1329	13.4058
	1330	13.1506
	1331	13.4406
	1332	13.6862
	1333	13.8982
	1334	13.4035
	1335	13.6562
	1336	13.5528
	1337	13.7634
	1338	13.3111
	1339	13.6647
	1340	12.8508
	1341	12.9751
	1342	13.3645
	1343	13.3856
	1344	13.3018
	1345	13.6985
	1346	13.5111
	1347	13.8075
	1348	13.4524
	1349	13.3549
	1350	12.9225
	1351	13.1026
	1352	12.6463
	1353	12.938
	1354	13.0403
	1355	13.5211
	1356	13.1226
	1357	13.6804
	1358	13.2103
	1359	13.1164
	1360	13.2539
	1361	13.7099
	1362	13.4924
	1363	13.7543
	1364	13.5347
	1365	14.0974
	1366	13.2483
	1367	13.4445
	1368	13.8076
	1369	13.8448
	1370	13.8975
	1371	13.9413
	1372	13.907
	1373	13.7443
	1374	13.8304
	1375	13.792
	1376	14.3505
	1377	13.9603
	1378	14.5899
	1379	14.6618
	1380	14.6909
	1381	15.3039
	1382	14.7285
	1383	16.3229
	1384	13.9394
	1385	16.4344
	1386	16.7851
	1387	16.1683
	1388	18.7484
	1389	17.4703
	1390	22.652
	1391	25.4115
	1392	30.1999
	1393	36.4547
	1394	48.0132
	1395	64.2965
	1396	70.0674
	1397	77.9608
	1398	82.5564
	1399	79.7828
	1400	81.0925
	1401	78.8466
	1402	80.0114
	1403	79.1063
	1404	69.8276
	1405	56.0626
	1406	47.3537
	1407	35.7809
	1408	32.1024
	1409	32.2547
	1410	27.2297
	1411	29.5592
	1412	27.2566
	1413	25.6037
	1414	22.936
	1415	21.662
	1416	17.703
	1417	20.3508
	1418	21.9571
	1419	21.0442
	1420	22.0645
	1421	21.7606
	1422	20.2782
	1423	20.759
	1424	20.1004
	1425	20.6143
	1426	22.5102
	1427	20.2552
	1428	23.3369
	1429	23.4883
	1430	24.0109
	1431	28.1986
	1432	31.0391
	1433	30.4845
	1434	35.7286
	1435	37.0578
	1436	45.3196
	1437	56.3344
	1438	69.6236
	1439	76.054
	1440	75.0844
	1441	80.9676
	1442	86.2279
	1443	84.7043
	1444	80.0641
	1445	85.2964
	1446	86.9943
	1447	86.1373
	1448	84.8243
	1449	91.4566
	1450	90.7414
	1451	95.8826
	1452	97.6012
	1453	98.1559
	1454	98.4065
	1455	98.4509
	1456	97.8535
	1457	94.442
	1458	92.1514
	1459	91.9006
	1460	87.7674
	1461	95.2501
	1462	96.8853
	1463	92.5069
	1464	91.5047
	1465	96.8498
	1466	96.9643
	1467	94.2181
	1468	95.0515
	1469	96.4421
	1470	95.1543
	1471	89.6061
	1472	87.9354
	1473	89.0625
	1474	91.3565
	1475	91.4865
	1476	91.2527
	1477	90.4429
	1478	89.3049
	1479	87.9291
	1480	88.7246
	1481	91.0977
	1482	82.6219
	1483	86.8049
	1484	91.2436
	1485	90.8436
	1486	95.6779
	1487	96.5799
	1488	96.3942
	1489	95.4601
	1490	94.4728
	1491	95.7955
	1492	93.0768
	1493	93.3533
	1494	91.8317
	1495	85.5917
	1496	89.238
	1497	91.4234
	1498	95.4253
	1499	95.7117
	1500	97.3205
	1501	97.7077
	1502	97.8094
	1503	97.5095
	1504	97.3028
	1505	96.9058
	1506	92.6963
	1507	92.0023
	1508	93.7368
	1509	95.7676
	1510	94.6466
	1511	91.5271
	1512	93.5246
	1513	92.0484
	1514	93.9173
	1515	86.8272
	1516	80.4148
	1517	78.138
	1518	89.0907
	1519	87.4474
	1520	82.8226
	1521	84.7004
	1522	79.8742
	1523	78.4069
	1524	83.3613
	1525	87.7344
	1526	92.9089
	1527	92.6022
	1528	92.6999
	1529	94.9587
	1530	96.1231
	1531	92.4062
	1532	93.0268
	1533	90.8866
	1534	94.1809
	1535	90.5908
	1536	92.9701
	1537	89.618
	1538	92.2623
	1539	89.629
	1540	84.3609
	1541	82.5774
	1542	90.0897
	1543	90.3943
	1544	90.5581
	1545	95.4913
	1546	96.8542
	1547	94.7829
	1548	96.2776
	1549	97.776
	1550	96.7347
	1551	95.8423
	1552	96.8729
	1553	97.2629
	1554	95.3694
	1555	93.1586
	1556	96.7202
	1557	94.8626
	1558	96.9281
	1559	98.0746
	1560	97.8784
	1561	98.3824
	1562	98.1696
	1563	97.0859
	1564	93.7004
	1565	93.1996
	1566	91.0976
	1567	93.2911
	1568	93.2135
	1569	95.4577
	1570	95.596
	1571	96.6294
	1572	96.3212
	1573	97.9198
	1574	97.6367
	1575	97.2664
	1576	97.8587
	1577	98.0745
	1578	96.8753
	1579	96.8545
	1580	97.6459
	1581	96.1352
	1582	95.3765
	1583	94.3903
	1584	95.8867
	1585	94.0223
	1586	91.1525
	1587	94.75
	1588	94.018
	1589	96.7455
	1590	96.2646
	1591	97.403
	1592	97.1423
	1593	95.2918
	1594	94.357
	1595	95.9853
	1596	94.6963
	1597	95.9704
	1598	94.6769
	1599	93.668
	1600	91.9046
	1601	95.422
	1602	95.7932
	1603	95.0472
	1604	93.5225
	1605	96.0249
	1606	95.026
	1607	92.3122
	1608	91.9489
	1609	94.3299
	1610	92.3188
	1611	92.8494
	1612	95.7627
	1613	94.6797
	1614	94.6124
	1615	95.053
	1616	95.1183
	1617	96.513
	1618	96.545
	1619	96.9681
	1620	96.4686
	1621	96.359
	1622	97.1045
	1623	96.4618
	1624	95.5589
	1625	95.5606
	1626	96.2621
	1627	95.5515
	1628	95.2403
	1629	96.5004
	1630	95.9158
	1631	95.7184
	1632	95.5553
	1633	95.7852
	1634	96.2561
	1635	95.023
	1636	92.7469
	1637	95.7455
	1638	93.3409
	1639	92.3751
	1640	89.2078
	1641	89.0925
	1642	91.6846
	1643	87.3804
	1644	83.6611
	1645	86.2309
	1646	89.0986
	1647	80.4704
	1648	72.8727
	1649	76.9919
	1650	83.9863
	1651	78.5386
	1652	75.9242
	1653	79.1368
	1654	87.7582
	1655	92.7458
	1656	92.6218
	1657	95.6213
	1658	93.2368
	1659	93.8237
	1660	92.8364
	1661	93.2316
	1662	95.9112
	1663	95.9743
	1664	95.4779
	1665	95.3486
	1666	95.8639
	1667	95.9083
	1668	93.9106
	1669	94.8427
	1670	93.741
	1671	92.6229
	1672	94.9601
	1673	91.7394
	1674	91.821
	1675	89.7984
	1676	87.4742
	1677	89.1752
	1678	89.0687
	1679	87.7452
	1680	88.1768
	1681	89.2026
	1682	88.3203
	1683	91.8134
	1684	90.4904
	1685	92.7985
	1686	95.1379
	1687	92.671
	1688	95.5086
	1689	94.253
	1690	93.7304
	1691	88.6547
	1692	82.6678
	1693	76.6136
	1694	69.0653
	1695	81.5358
	1696	87.9152
	1697	92.8433
	1698	92.7399
	1699	93.4929
	1700	91.0359
	1701	92.4013
	1702	88.4893
	1703	89.1716
	1704	89.47
	1705	92.2672
	1706	93.9653
	1707	93.0324
	1708	93.2503
	1709	91.4345
	1710	92.0668
	1711	94.0319
	1712	95.0086
	1713	93.3262
	1714	94.9482
	1715	95.6898
	1716	96.419
	1717	93.5911
	1718	94.0101
	1719	95.2578
	1720	92.7973
	1721	91.4324
	1722	90.8293
	1723	93.1399
	1724	93.8666
	1725	96.8301
	1726	96.4837
	1727	96.485
	1728	94.5009
	1729	91.3302
	1730	91.4133
	1731	87.9621
	1732	87.742
	1733	85.6962
	1734	86.1377
	1735	87.1096
	1736	88.5211
	1737	89.217
	1738	90.2117
	1739	94.2559
	1740	93.9105
	1741	94.1665
	1742	97.1966
	1743	96.9193
	1744	94.9367
	1745	95.7127
	1746	93.6131
	1747	93.5347
	1748	95.6833
	1749	94.1752
	1750	92.5933
	1751	93.1707
	1752	93.8085
	1753	90.9638
	1754	87.6832
	1755	87.2274
	1756	91.2391
	1757	88.3212
	1758	89.976
	1759	89.1818
	1760	92.8391
	1761	89.4023
	1762	88.5883
	1763	93.949
	1764	93.9309
	1765	90.7525
	1766	91.7242
	1767	96.0319
	1768	93.8734
	1769	90.7993
	1770	94.9192
	1771	96.6649
	1772	92.5415
	1773	91.7981
	1774	94.2326
	1775	96.2371
	1776	97.9701
	1777	97.2902
	1778	96.3845
	1779	95.9447
	1780	95.5132
	1781	93.8882
	1782	91.2825
	1783	91.4878
	1784	94.2856
	1785	93.466
	1786	95.6846
	1787	92.3357
	1788	85.0037
	1789	82.6723
	1790	91.6837
	1791	92.8455
	1792	97.0571
	1793	95.5383
	1794	95.2437
	1795	97.1117
	1796	97.9866
	1797	96.3133
	1798	96.096
	1799	97.3944
	1800	96.3434
	1801	93.5711
	1802	94.8164
	1803	91.2127
	1804	90.5131
	1805	96.244
	1806	96.1603
	1807	94.8532
	1808	97.3362
	1809	97.9448
	1810	95.9306
	1811	95.8722
	1812	97.4324
	1813	95.6539
	1814	93.1526
	1815	91.7953
	1816	89.1075
	1817	92.0696
	1818	96.4092
	1819	95.2161
	1820	96.5408
	1821	96.0749
	1822	90.8892
	1823	91.7064
	1824	86.5647
	1825	88.2399
	1826	88.3812
	1827	86.3435
	1828	80.1529
	1829	87.4843
	1830	94.6519
	1831	95.7124
	1832	97.2912
	1833	97.7677
	1834	97.9938
	1835	97.7405
	1836	96.8063
	1837	95.1616
	1838	96.5082
	1839	92.1974
	1840	88.495
	1841	84.0611
	1842	88.1932
	1843	84.7094
	1844	86.5797
	1845	92.5446
	1846	89.8087
	1847	91.9941
	1848	94.7188
	1849	97.0776
	1850	97.1081
	1851	95.6804
	1852	98.4388
	1853	98.2671
	1854	98.1797
	1855	97.9258
	1856	98.2612
	1857	98.3301
	1858	98.0035
	1859	98.1061
	1860	97.7681
	1861	97.6673
	1862	97.1409
	1863	95.5212
	1864	93.9995
	1865	94.7363
	1866	92.7112
	1867	90.7688
	1868	91.8422
	1869	90.6975
	1870	91.827
	1871	92.0205
	1872	94.5146
	1873	95.0641
	1874	96.8541
	1875	96.774
	1876	96.3107
	1877	94.9678
	1878	91.8473
	1879	94.5561
	1880	93.8092
	1881	95.2077
	1882	92.3759
	1883	93.6397
	1884	88.6627
	1885	89.9035
	1886	91.3537
	1887	89.1891
	1888	90.8978
	1889	91.7023
	1890	92.3128
	1891	94.0365
	1892	95.4928
	1893	95.0891
	1894	95.9586
	1895	94.6982
	1896	96.6519
	1897	96.4385
	1898	92.8632
	1899	93.9809
	1900	89.2104
	1901	86.4994
	1902	85.892
	1903	86.5705
	1904	86.6128
	1905	87.9154
	1906	88.3814
	1907	91.2214
	1908	90.4485
	1909	89.7759
	1910	93.8439
	1911	92.5955
	1912	92.4481
	1913	92.2504
	1914	91.6654
	1915	94.4732
	1916	93.8068
	1917	92.478
	1918	95.3124
	1919	91.5612
	1920	91.4338
	1921	94.4687
	1922	92.41
	1923	92.5448
	1924	92.0687
	1925	87.2206
	1926	87.5613
	1927	87.3858
	1928	87.2754
	1929	87.9234
	1930	88.0215
	1931	87.6078
	1932	88.7838
	1933	91.7543
	1934	92.6284
	1935	92.2314
	1936	92.9193
	1937	93.4918
	1938	94.5293
	1939	94.642
	1940	94.3206
	1941	93.2638
	1942	94.3963
	1943	94.0972
	1944	91.8699
	1945	90.7641
	1946	93.7765
	1947	91.5303
	1948	94.0866
	1949	92.0576
	1950	89.7273
	1951	89.5007
	1952	89.7049
	1953	90.308
	1954	92.3761
	1955	89.8129
	1956	86.0431
	1957	90.2987
	1958	92.1652
	1959	86.2219
	1960	85.7437
	1961	91.4745
	1962	86.4152
	1963	82.1783
	1964	84.8161
	1965	84.3034
	1966	93.4845
	1967	92.2239
	1968	85.1769
	1969	83.8886
	1970	82.0543
	1971	67.8932
	1972	74.4248
	1973	83.0844
	1974	89.3281
	1975	94.1487
	1976	89.7266
	1977	92.6896
	1978	89.038
	1979	90.0536
	1980	90.5293
	1981	93.0624
	1982	92.6461
	1983	92.6728
	1984	93.6404
	1985	94.9202
	1986	93.1875
	1987	93.1774
	1988	94.2193
	1989	90.8199
	1990	91.0468
	1991	91.09
	1992	83.1539
	1993	80.6408
	1994	83.935
	1995	89.6404
	1996	92.1412
	1997	91.3546
	1998	94.4109
	1999	91.7964
[truncated: 1,190 more rows]
[truncated: 3,144 more columns]

## Sheet: AlphaFold BTRR_predicted LDDT
		Length
0-1416	BLM	1417
1417-2417	TOP3A	1001
2418-3042	RMI1	625
3043-3189	RMI2	147
	0	1	2	3	4	5	6	7	8	9	10	11	12	13	14	15	16	17	18	19	20	21	22	23	24	25	26	27	28	29	30	31	32	33	34	35	36	37	38	39	40	41	42	43	44	45	46	47	48
pLDDT	27.8999	39.6828	51.1355	67.4122	80.3453	83.9128	82.0642	81.4291	84.8715	83.8477	82.4543	82.7167	86.2322	78.2703	76.2118	79.0071	74.5969	66.2636	60.2588	56.4973	44.8086	43.2811	42.0706	36.8916	31.9437	35.3087	33.0726	35.0056	41.4596	35.3277	40.7173	40.9527	45.3826	54.0918	62.1027	61.7338	72.1247	61.1437	48.9689	44.0577	34.3893	27.5218	26.3447	21.1204	21.0345	19.6315	16.4831	17.0269	15.6104
BLM	1	2	3	4	5	6	7	8	9	10	11	12	13	14	15	16	17	18	19	20	21	22	23	24	25	26	27	28	29	30	31	32	33	34	35	36	37	38	39	40	41	42	43	44	45	46	47	48	49
	27.8999	39.6828	51.1355	67.4122	80.3453	83.9128	82.0642	81.4291	84.8715	83.8477	82.4543	82.7167	86.2322	78.2703	76.2118	79.0071	74.5969	66.2636	60.2588	56.4973	44.8086	43.2811	42.0706	36.8916	31.9437	35.3087	33.0726	35.0056	41.4596	35.3277	40.7173	40.9527	45.3826	54.0918	62.1027	61.7338	72.1247	61.1437	48.9689	44.0577	34.3893	27.5218	26.3447	21.1204	21.0345	19.6315	16.4831	17.0269	15.6104
TOP3A	1	2	3	4	5	6	7	8	9	10	11	12	13	14	15	16	17	18	19	20	21	22	23	24	25	26	27	28	29	30	31	32	33	34	35	36	37	38	39	40	41	42	43	44	45	46	47	48	49
	20.3508	21.9571	21.0442	22.0645	21.7606	20.2782	20.759	20.1004	20.6143	22.5102	20.2552	23.3369	23.4883	24.0109	28.1986	31.0391	30.4845	35.7286	37.0578	45.3196	56.3344	69.6236	76.054	75.0844	80.9676	86.2279	84.7043	80.0641	85.2964	86.9943	86.1373	84.8243	91.4566	90.7414	95.8826	97.6012	98.1559	98.4065	98.4509	97.8535	94.442	92.1514	91.9006	87.7674	95.2501	96.8853	92.5069	91.5047	96.8498
RMI1	1	2	3	4	5	6	7	8	9	10	11	12	13	14	15	16	17	18	19	20	21	22	23	24	25	26	27	28	29	30	31	32	33	34	35	36	37	38	39	40	41	42	43	44	45	46	47	48	49
	48.1364	69.9742	82.7397	86.4113	86.9289	91.0378	92.9808	90.4462	91.4338	93.9617	95.3115	92.4814	93.5379	96.5269	94.3885	91.0946	90.4288	95.3121	95.7736	97.1394	95.4795	94.9483	92.5962	92.0263	86.5136	91.1166	93.7006	91.0263	88.739	88.8668	89.7086	84.1333	83.9044	85.18	84.183	76.3779	76.2391	76.1867	73.4626	63.9897	65.7926	71.0812	81.3807	84.1111	88.5227	87.4191	88.3835	90.086	93.0943
RMI2	1	2	3	4	5	6	7	8	9	10	11	12	13	14	15	16	17	18	19	20	21	22	23	24	25	26	27	28	29	30	31	32	33	34	35	36	37	38	39	40	41	42	43	44	45	46	47	48	49
	18.4395	19.9975	19.9279	19.9106	19.3762	19.9849	21.0165	22.6761	21.7422	23.8951	24.1661	26.219	24.689	30.236	35.4857	48.0118	58.6778	65.2604	70.5319	78.7806	86.9433	92.3041	93.1076	94.7457	95.1485	94.4896	94.4826	91.8468	92.5657	93.1268	90.2542	89.4645	88.786	89.3692	83.8995	81.659	73.8677	67.9568	68.0252	77.5624	86.0503	88.2335	88.9968	87.8734	86.7031	78.841	79.7307	77.9155	79.308
[truncated: 3,141 more columns]
