# Supplementary material for: Centromere protection requires strict mitotic inactivation of the Bloom syndrome helicase complex
Source: Research Square preprint supplement (doi:10.21203/rs.3.rs-4420374/v1), 2024-05-30
Supplement: Supplementary file 40 [file Fig S3A. HeLa-U20S_siTOP3A_UFBs.xlsx]

## Sheet: Fig S2A Ratio normalised 
				3.36337						4.56505						4.62608						5.81472
	U2OS_BLM/PICH ratio			Normalised to mean siCTRL			U2OS_TOP3A/PICH ratio			Normalised to mean siCTRL			HeLa_BLM/PICH ratio			Normalised to mean siCTRL			HeLa_TOP3A/PICH ratio			Normalised to mean siCTRL
	U2OS siCTRL	U20S siTOP3A		U2OS siCTRL	U20S siTOP3A		U2OS siCTRL	U20S siTOP3A		U2OS siCTRL	U20S siTOP3A		HeLa siCTRL	HeLa siTOP3A		HeLa siCTRL	HeLa siTOP3A		HeLa siCTRL	HeLa siTOP3A		HeLa siCTRL	HeLa siTOP3A
	2.50113	0		0.743637	0		4.45809	0		0.97657	0		6.11869	0		1.32265	0		5.69048	0		0.978633	0
	3.46899	1.11621		1.0314	0.331872		7.63937	0		1.67345	0		5.59113	0		1.20861	0		6.93693	0		1.19299	0
	3.74165	0.285807		1.11247	0.0849764		6.83883	0		1.49808	0		4.78092	0		1.03347	0		4.99191	0		0.858495	0
	2.92798	0.84106		0.87055	0.250064		3.72505	0		0.815994	0		5.5572	0		1.20128	0		3.40533	0		0.585639	0
	4.40282	0.382268		1.30905	0.113656		8.75493	0		1.91782	0		4.87602	0		1.05403	0		3.09612	0		0.532462	0
	2.84986	0		0.847324	0		2.97414	0		0.651502	0		4.94233	0.523658		1.06836	0.113197		1.0793	0		0.185615	0
	5.21445	0.326872		1.55036	0.0971858		10.3301	0		2.26286	0		8.51339	1.02071		1.8403	0.220643		8.0463	0		1.38378	0
	1.45888	0.684314		0.433754	0.203461		0.738125	0		0.16169	0		5.43624	1.28725		1.17513	0.278259		5.54815	1.54596		0.954157	0.26587
	1.90058	0.547871		0.565081	0.162893		1.57054	0		0.344035	0		5.00969	1.28123		1.08292	0.276958		4.12942	0.604312		0.710167	0.103928
	2.44117	1.0489		0.725811	0.31186		3.30897	0		0.72485	0		4.65587	1.64088		1.00644	0.354702		5.62652	1.1421		0.967634	0.196416
	2.2597	0.785318		0.671856	0.233491		2.59292	0		0.567994	0		5.22655	1.33869		1.1298	0.289379		9.91108	0		1.70448	0
	1.22084	0.730961		0.362981	0.21733		0.921852	0.627029		0.201937	0.137354		6.02689	1.87526		1.30281	0.405367		6.35805	0.2641		1.09344	0.0454193
	1.02626	0.463555		0.305129	0.137825		0.730663	0		0.160056	0		6.0345	1.88932		1.30445	0.408407		5.81321	0.184245		0.99974	0.0316859
	1.69429	0.62943		0.503747	0.187143		1.87075	0		0.409797	0		5.05399	1.34554		1.0925	0.29086		4.40684	1.47759		0.757877	0.254112
	1.4463	0.591216		0.430016	0.175781		3.11791	0.921622		0.682996	0.201886		4.35733	0.303205		0.941905	0.0655424		7.02937	0		1.20889	0
	3.32285	0		0.987951	0		4.09782	0		0.89765	0		4.7594	1.90462		1.02882	0.411713		9.19533	0.184615		1.58139	0.0317497
	1.53241	0.567711		0.455617	0.168792		2.00937	0		0.440163	0		3.79042	1.35149		0.81936	0.292146		8.97459	0.639317		1.54343	0.109948
	1.91998	0.931365		0.570849	0.276914		2.96406	0		0.649294	0		5.97349	0.13859		1.29126	0.0299583		10.1422	0		1.74424	0
	2.69308	1.05996		0.800709	0.315147		6.16547	0.27954		1.35058	0.0612349		5.67075	0.3358		1.22582	0.0725884		11.2914	0		1.94186	0
	2.44517	1.18453		0.726999	0.352185		6.57132	0.566195		1.43948	0.124028		7.84942	0		1.69677	0		14.3782	0		2.47272	0
	2.07027	1.26562		0.615534	0.376295		4.29491	1.34144		0.940823	0.29385		4.85671	1.43895		1.04985	0.311052		8.37738	0.633061		1.44072	0.108872
	1.98595	1.75907		0.590464	0.523009		2.86453	0.87482		0.627491	0.191634		4.56434	1.03586		0.986653	0.223917		8.33031	0.629798		1.43262	0.108311
	2.74581	1.20592		0.816387	0.358546		3.38686	0.824357		0.741911	0.18058		3.05372	1.41391		0.660109	0.305639		8.42479	1.35153		1.44887	0.232432
	2.58566	1.1842		0.768771	0.352087		4.16452	0.929967		0.912262	0.203714		6.16632	0.289623		1.33295	0.0626066		11.4737	0		1.97321	0
	8.66416	1.40477		2.57603	0.417666		6.67018	0.863192		1.46114	0.189087		4.74015	0.400565		1.02466	0.0865884		8.57471	0		1.47466	0
	3.76715	1.04298		1.12005	0.310101		4.7265	0.941131		1.03537	0.20616		3.38989	0.31427		0.732778	0.0679345		8.42168	0		1.44834	0
	3.50796	1.00429		1.04299	0.298596		5.34378	0.42654		1.17059	0.0934361		6.03019	0		1.30352	0		10.1917	0		1.75274	0
	3.22174	0.309208		0.957891	0.091934		6.10811	0		1.33802	0		3.73459	0		0.80729	0		2.66479	0		0.458284	0
	3.70438	0		1.10139	0		5.40523	0.705866		1.18405	0.154624		5.31475	0		1.14887	0		4.37361	0		0.752163	0
	3.06989	0		0.912742	0		3.90801	0.441078		0.856072	0.0966207		5.01621	0		1.08433	0		2.54641	0		0.437924	0
	2.8826	0		0.857056	0		4.27394	0		0.93623	0		4.67727	0		1.01106	0		3.19301	0		0.549125	0
	3.55036	0		1.0556	0		2.59908	0.312317		0.569343	0.0684147		3.35172	0.906319		0.724526	0.195915		3.03725	0		0.522339	0
	8.0361	0		2.3893	0		5.93477	1.20798		1.30004	0.264615		3.65171	0.922849		0.789375	0.199488		4.2133	0		0.724592	0
	5.98121	0.739933		1.77834	0.219997		12.974	0.859433		2.84203	0.188264		4.68464	0.881837		1.01266	0.190623		0.694965	0		0.119518	0
	6.07256	0.851885		1.8055	0.253283		9.95577	1.05222		2.18087	0.230495		4.20291	0.994497		0.908526	0.214976		1.77176	0.013573		0.304703	0.00233425
	3.56843	1.71092		1.06097	0.508692		5.33315	1.44785		1.16826	0.317159		4.23692	0		0.915876	0		1.39427	0		0.239783	0
	5.10138	1.39545		1.51675	0.414895		8.37452	0		1.83449	0		3.33568	0.397304		0.721059	0.0858836		4.10378	0		0.705758	0
	6.56032	1.15562		1.95052	0.343589		11.2257	0		2.45906	0		2.6926	0.180173		0.582047	0.0389471		1.94152	0		0.333898	0
	5.71038	1.64641		1.69782	0.489513		9.2031	0		2.01599	0		7.81577	0.344216		1.6895	0.0744078		12.4764	0		2.14566	0
	4.79745	0.708287		1.42638	0.210588		4.67847	0		1.02485	0		6.9183	0.413291		1.4955	0.0893392		7.08484	0.128706		1.21843	0.0221344
	5.10632	1.18831		1.51821	0.35331		7.98767	0.0743395		1.74974	0.0162845		4.66129	0.108388		1.00761	0.0234298		5.58111	0		0.959824	0
	2.9504	0.986546		0.877214	0.293321		2.39307	0		0.524216	0		5.56473	0.944133		1.2029	0.204089		0.0509684	0		0.00876541	0
	2.78865	0.878987		0.829124	0.261341		0	0		0	0		4.87571	0.75		1.05396	0.162124		3.05165	0		0.524815	0
	3.10526	1.22045		0.923259	0.362864		5.02065	0		1.0998	0		4.86568	0.195499		1.05179	0.0422601		3.18737	0		0.548155	0
	4.43365	1.39023		1.31821	0.413345		5.96933	0		1.30761	0		5.94612	0.445609		1.28535	0.0963254		6.072	0		1.04425	0
	2.24316	1.36043		0.666938	0.404485		6.2096	0		1.36025	0		5.70279	0		1.23275	0		7.2173	0.505194		1.24121	0.0868819
	3.33057	0.810967		0.990246	0.241117		5.76599	0		1.26307	0		4.78668	0		1.03472	0		3.07563	0.550156		0.528938	0.0946143
	3.05554	0		0.908474	0		2.47402	0		0.541949	0		5.33239	0		1.15268	0		3.47045	0.578166		0.596838	0.0994315
	1.99012	1.21285		0.591703	0.360605		0	0		0	0		1.78815	0.123925		0.386537	0.0267884		3.91503	0		0.673296	0
	3.91551	1.74801		1.16416	0.51972		3.16204	0.775715		0.692663	0.169925		1.67514	0.251117		0.362109	0.0542829		1.95471	0		0.336167	0
	5.55069	1.47212		1.65034	0.437691		8.07741	0.773131		1.7694	0.169359		2.41526	0		0.522096	0		2.47119	0		0.42499	0
	5.25558	1.51565		1.56259	0.450635		5.14571	0.248986		1.1272	0.0545417		2.64547	0.0357143		0.57186	0.0077202		2.04349	0.542381		0.351435	0.0932772
	4.51079	1.35872		1.34115	0.403977		5.9361	0.259079		1.30034	0.0567527		2.73903	0.762531		0.592084	0.164833		5.63942	0		0.969852	0
	5.72029	1.65298		1.70076	0.491464		5.52503	0.1483		1.21029	0.032486		2.92636	0.0663822		0.632579	0.0143495		5.22668	0		0.89887	0
	3.31653	0.956368		0.986072	0.284348		4.42304	0		0.968891	0		2.70191	0.595816		0.584061	0.128795		5.48506	0		0.943307	0
	3.18845	0		0.947992	0		5.10068	0		1.11733	0		3.1422	0.534638		0.679236	0.11557		4.43273	0		0.76233	0
	3.21267	0		0.955193	0		4.71991	0		1.03392	0		2.10443	0.391564		0.454905	0.0846428		2.66373	0.401528		0.458101	0.0690537
	2.24457	0.114981		0.667357	0.0341863		1.78363	0		0.390715	0		2.42146	0.385235		0.523437	0.0832746		5.83329	0		1.00319	0
	2.33586	0.228979		0.6945	0.0680803		1.60547	0		0.351688	0		3.24968	0		0.70247	0		7.13223	0		1.22658	0
	2.11373	0.398305		0.628455	0.118424		1.98137	0		0.434029	0		7.75272	0		1.67587	0		12.0979	0.0309504		2.08056	0.00532277
	3.08036	0		0.915853	0		2.91869	0		0.639355	0		5.0526	0.203344		1.0922	0.0439559		9.4146	0.436126		1.6191	0.0750038
	2.73201	0		0.812284	0		2.4846	0		0.544267	0		4.79827	0.233931		1.03722	0.050568		2.90058	0		0.498833	0
	2.95413	0.295936		0.878324	0.0879879		3.20383	0		0.701817	0		7.78395	0.65844		1.68262	0.142332		12.2358	0.617637		2.10428	0.10622
	3.15758	0.743221		0.938815	0.220975		3.12979	0		0.685599	0		3.8978	0		0.84257	0		5.26838	0		0.906043	0
	3.0865	0.386991		0.91768	0.11506		3.78661	0		0.829478	0		3.77149	0		0.815266	0		2.7928	0		0.480299	0
	3.54143	0		1.05294	0		4.32286	0		0.946946	0		4.03224	1.24683		0.871631	0.269522		1.63739	0		0.281593	0
	2.63452	0.870484		0.783299	0.258813		3.52091	0.383478		0.771276	0.084003		3.24444	0		0.701336	0		2.23175	0		0.38381	0
	2.74499	1.35552		0.816143	0.403024		3.43462	0.155638		0.752373	0.0340934		2.88726	0		0.624126	0		2.59145	0		0.44567	0
	2.58369	1.21757		0.768185	0.362008		2.63354	0.0583012		0.576892	0.0127712		4.03985	0		0.873276	0		5.67355	0		0.975723	0
	2.83228	0.650325		0.842097	0.193355		3.4686	0.0838744		0.759816	0.0183732		3.10412	0		0.671003	0		5.17893	0		0.890659	0
	2.45514	0.503766		0.729963	0.14978		2.18988	0		0.479706	0		3.48973	0		0.75436	0		5.95443	0		1.02403	0
	2.74988	0.56352		0.817598	0.167546		2.22091	0		0.486503	0		3.03641	0.720219		0.656368	0.155687		2.50974	0		0.431618	0
	2.39244	0.207352		0.711322	0.0616501		1.73485	0		0.380029	0		3.99437	0.830518		0.863446	0.17953		4.60586	0		0.792103	0
	2.61083	0		0.776253	0		2.44087	0		0.534685	0		2.9523	0		0.638187	0		1.98482	0		0.341345	0
	3.10113	1.3861		0.922031	0.412116		3.82402	1.66292		0.837674	0.364271		5.00459	0		1.08182	0		3.43557	0		0.59084	0
	4.37605	1.43569		1.30109	0.426859		7.00153	0.872041		1.53372	0.191026		3.8294	0		0.827786	0		11.0985	0		1.90869	0
	4.09811	1.29028		1.21845	0.383628		8.08562	1.04168		1.7712	0.228186		4.76896			1.03089			4.72512			0.812613
	2.83439	1.52908		0.842722	0.454628		5.70365	1.18482		1.24942	0.259541		3.54849			0.767062			11.969			2.0584
	2.36126	1.46917		0.702052	0.436816		3.54206	0.917344		0.775909	0.200949		3.99305			0.863161			5.94471			1.02236
	4.32248	1.32122		1.28516	0.392826		9.47045	0.349275		2.07456	0.0765107		3.68355			0.796257			3.73769			0.642797
		0.976313			0.290278			0.276735			0.0606205		4.53319			0.979919			8.86726			1.52497
		0.87549			0.260301			0.682187			0.149437		3.46305			0.748593			8.80269			1.51386
		1.02976			0.30617			0.00611961			0.00134054		5.34713			1.15587			10.072			1.73215
		0.59834			0.177899			0.152618			0.0334319		3.08098			0.666002			1.68798			0.290295
		0.486049			0.144512			0			0		4.5836			0.990817			3.56163			0.61252
		0.555381			0.165126			0			0		3.22047			0.696156			5.03281			0.865529
		0.0109077			0.00324308			0			0		4.39302			0.949621			4.84463			0.833167
		0.740733			0.220235			0.0658287			0.0144202		4.4738			0.967083			4.22273			0.726214
		0.969689			0.288309			0.784603			0.171872		4.70284			1.01659			5.01174			0.861906
		1.06839			0.317654			0.75275			0.164894		4.25112			0.918945			4.52395			0.778017
		1.11646			0.331947			1.044			0.228693		4.74442			1.02558			3.89703			0.670202
		1.15457			0.343278			0.896636			0.196413		4.35142			0.940629			4.68938			0.806467
		1.04192			0.309786			0.693152			0.151839		4.04926			0.875311			3.97126			0.682968
		1.19506			0.355316			0.326015			0.0714153		3.37741			0.730081			2.98566			0.513467
		1.09258			0.324846			0.244322			0.0535202		5.26501			1.13812			10.201			1.75433
		1.34255			0.399169			0.50575			0.110787		5.73672			1.24008			6.76374			1.16321
		1.31551			0.391128			0.846086			0.18534		7.184			1.55294			10.463			1.7994
		0.890727			0.264832			0.443985			0.0972574		5.04719			1.09103			8.88525			1.52806
		0.79645			0.236801			1.34526			0.294687		7.12373			1.53991			9.90251			1.70301
		0.515721			0.153335			1.11128			0.243433		4.62805			1.00042			7.68845			1.32224
		0.66809			0.198637			1.8296			0.400784		5.25452			1.13585			7.01057			1.20566
		1.21313			0.36069			2.29772			0.503328		8.17075			1.76624			7.5038			1.29048
		1.58212			0.470398			2.35925			0.516808		8.77625			1.89712			9.9409			1.70961
		1.54207			0.458489			3.66198			0.802176		3.71601			0.803275			5.06912			0.871775
		1.48149			0.440478			2.02559			0.443716		5.39584			1.1664			9.11297			1.56722
		1.61199			0.479277			2.77134			0.607078
		0.383375			0.113985			0.136317			0.0298611
		0.411429			0.122326			0.644675			0.14122
		0.58589			0.174197			0.787078			0.172414
		0.822567			0.244566			1.33731			0.292945
		0.62505			0.18584			1.66151			0.363964
		1.09797			0.32645			1.74659			0.382601
		1.15891			0.344568			1.74189			0.38157
		0.778716			0.231528			1.09265			0.23935

## Sheet: U20S siTOP3A RawData
	Exp 2022-01-20
	HeLa siCTRL_+ICRF-193_gBLM-rTOP3A-mPICH											HeLa siTOP3A_+ICRF-193_gBLM-rTOP3A-mPICH
	U2OS_siCTRL_gBLMC18-TOP3A-PICH-04.czi			Area	Mean	StdDev	Min	Max	Length			U2OS_siTOP3A_gBLMC18-TOP3A-PICH-03.czi			Area	Mean	StdDev	Min	Max	Length
	Background	PICH	1	0.3	1032.4	20.4	980.9	1086.5	4.7			Background	PICH	1	0.6	835.6	23.2	773.2	893.2	9.1
	Background	TOP3A	2	0.3	3437.2	174.9	3088.9	3990.5	4.7			Background	TOP3A	2	0.6	2875.9	284.9	2447.2	3750.2	9.1
	Background	BLM	3	0.3	4230.6	133.6	3905.5	4635.8	4.7			Background	BLM	3	0.6	3174.9	81.8	3006	3384.3	9.1
		PICH	1	0.2	1476.2	147	1254.8	1827	3.6				PICH	4	0.2	932.9	33.5	842.7	978.8	3.6
		TOP3A	2	0.2	5415.7	481.2	4259	6325.6	3.6				TOP3A	5	0.2	2518.7	151.1	2223	2973	3.6
		BLM	3	0.2	5340.6	317.9	4548	5934.2	3.6				BLM	6	0.2	3097.5	81.4	2934	3271.4	3.6
		PICH	4	0.3	1319.4	87.5	1189.6	1498.1	4.6				PICH	7	0.2	1031.8	106.4	905.4	1315.2	3.5
		TOP3A	5	0.3	5629.7	618.9	4572.4	7065.4	4.6				TOP3A	8	0.2	2478.2	157.5	2284.3	2782.8	3.5
		BLM	6	0.3	5226.2	196.7	4887.4	5672.8	4.6				BLM	9	0.2	3393.9	167.8	3056.9	3742.5	3.5
		PICH	7	0.3	1490.3	89.5	1318.6	1662.4	4.4				PICH	10	0.4	989.2	79.9	823.3	1117.8	5.3
		TOP3A	8	0.3	6568.7	714.3	5121.7	7577.6	4.4				TOP3A	11	0.4	2441.8	328.5	1962.7	3310.9	5.3
		BLM	9	0.3	5943.9	469.3	5171.8	6825.2	4.4				BLM	12	0.4	3218.8	167.4	2851.7	3444.2	5.3
		PICH	10	0.2	1421.2	113.9	1232.8	1626.8	3.1				PICH	13	0.2	986.6	41	903.6	1053.2	3.1
		TOP3A	11	0.2	4885.5	625.1	3916.2	6238	3.1				TOP3A	14	0.2	2574.8	253.6	2154	3027.8	3.1
		BLM	12	0.2	5369	568	4516.5	6426.5	3.1				BLM	15	0.2	3301.9	96.6	3143	3530.9	3.1
		PICH	13	0.5	1316.4	110.1	1155.7	1644.4	7.2
		TOP3A	14	0.5	5923.6	1077.7	3939	10149.5	7.2			U2OS_siTOP3A_gBLMC18-TOP3A-PICH-04.czi
		BLM	15	0.5	5481	514.5	4490	7715.7	7.2			Background	PICH	1	0.5	866.7	23.8	819.5	937.1	7.5
		PICH	16	0.1	1291.5	74.3	1166.3	1458	1.8			Background	TOP3A	2	0.5	3243.3	478.8	2628.2	4506.8	7.5
		TOP3A	17	0.1	4207.8	162.2	4023.9	4651.7	1.8			Background	BLM	3	0.5	3993.2	143.5	3724	4368	7.5
		BLM	18	0.1	4969	397.4	4492.6	5828.9	1.8				PICH	4	0.4	1246.8	180	971	1668.5	5.8
													TOP3A	5	0.4	2533.6	228.4	2195.5	3355.6	5.8
	U2OS_siCTRL_gBLMC18-TOP3A-PICH-05.czi												BLM	6	0.4	4138.5	433.1	3506.4	5090.1	5.8
	Background	PICH	1	0.3	988.2	25.3	936.3	1038	4.2				PICH	7	0.4	1182	111	966.1	1395.7	5.8
	Background	TOP3A	2	0.3	3355.4	332.6	2911	4300.8	4.2				TOP3A	8	0.4	2675.8	235.6	2258.6	3239.4	5.8
	Background	BLM	3	0.3	3758.8	80.8	3610.4	3998.7	4.2				BLM	9	0.4	3988.6	202.6	3505.3	4555.4	5.8
		PICH	4	0.6	1161.2	146.3	978.8	1749.9	8.9				PICH	10	0.2	1279.4	128.5	1027	1448.7	3.8
		TOP3A	5	0.6	5142.5	709.8	3833	6787.3	8.9				TOP3A	11	0.2	2681.9	205.1	2430.5	3243.7	3.8
		BLM	6	0.6	4660.9	433.9	3827.6	5555.6	8.9				BLM	12	0.2	4128.1	159.3	3855.3	4434.4	3.8
													PICH	13	0.2	1576.9	194.1	1094.3	1821.9	2.9
	U2OS_siCTRL_gBLMC18-TOP3A-PICH-06.czi												TOP3A	14	0.2	2909.4	272.1	2500.3	3431.7	2.9
	Background	PICH	1	0.3	1025.4	27.3	958.8	1098.4	5				BLM	15	0.2	4479.2	380.9	3743.3	5074.6	2.9
	Background	TOP3A	2	0.3	3167.9	560.4	2653.4	5426.7	5				PICH	16	0.3	1367	176.8	1054.3	1719.5	5
	Background	BLM	3	0.3	3873.5	127.7	3636	4205.3	5				TOP3A	17	0.3	2858.6	331.3	2396.1	3735	5
		PICH	4	0.2	1739.1	286.2	1374	2428	3.6				BLM	18	0.3	4267.3	363.3	3558.5	5218.3	5
		TOP3A	5	0.2	3694.7	415	3158	4895.1	3.6				PICH	19	0.3	1386.1	154.9	1075	1667.5	4
		BLM	6	0.2	4914.7	424	4188	6065	3.6				TOP3A	20	0.3	3083.7	342	2572	4098.7	4
		PICH	7	0.2	1683.2	235.4	1446.8	2226.5	3.1				BLM	21	0.3	4538	225.7	3918.6	4903.3	4
		TOP3A	8	0.2	4201	831	3143.6	6238.3	3.1				PICH	22	0.3	1245.4	99.5	1048.5	1462.3	4.9
		BLM	9	0.2	5123.7	466.7	4401.8	6257.3	3.1				TOP3A	23	0.3	3092.1	376.6	2490.1	3783	4.9
		PICH	10	0.4	1541.3	157	1234	1941.2	5.4				BLM	24	0.3	4290.6	330	3719	5071.1	4.9
		TOP3A	11	0.4	4875	761.8	3378.8	6377.9	5.4				PICH	25	0.3	1187.1	112.2	990.1	1417.9	3.9
		BLM	12	0.4	5132.9	312.2	4114	5687.8	5.4				TOP3A	26	0.3	3444.2	579.9	2663.4	4716.3	3.9
		PICH	13	0.3	1613	140.9	1389.5	1893.7	4.3				BLM	27	0.3	4227.4	260.8	3818.8	4736.3	3.9
		TOP3A	14	0.3	4691.5	550	3746.8	5955.7	4.3				PICH	28	0.3	1335.9	213.6	1023.1	1766.1	4
		BLM	15	0.3	5201.3	430.9	4518	6011.7	4.3				TOP3A	29	0.3	3182.3	515.6	2415.3	4749	4
		PICH	16	0.1	1716.4	155	1442	1974.7	2.2				BLM	30	0.3	4210.7	319.4	3815.6	5004.6	4
		TOP3A	17	0.1	3804.9	267	3332.5	4254.5	2.2				PICH	31	0.3	1089.6	67.3	976.2	1267.3	4.6
		BLM	18	0.1	4717.1	374.1	4077.7	5280.7	2.2				TOP3A	32	0.3	2643.9	157.9	2231	2929.2	4.6
		PICH	19	0.1	1859.3	365.4	1329	2447.4	2.3				BLM	33	0.3	4133.5	363.3	3627.5	5388.8	4.6
		TOP3A	20	0.1	3777.2	469.8	2991.4	4536.9	2.3
		BLM	21	0.1	4729.3	514.1	4031.1	5571.1	2.3			U2OS_siTOP3A_gBLMC18-TOP3A-PICH-05.czi
		PICH	22	0.2	1519	110.1	1341.7	1779.6	3.4			Background	PICH	1	1.3	846	29.7	769.6	923.8	20.1
		TOP3A	23	0.2	4091.3	345.9	3313	4704.9	3.4			Background	TOP3A	2	1.3	2812.2	392.9	2185.5	4318.7	20.1
		BLM	24	0.2	4709.8	191.8	4307	5108.9	3.4			Background	BLM	3	1.3	3572	190.1	3199	4505.4	20.1
													PICH	4	0.1	1142	86.6	1019	1319.1	2.2
	U2OS_siCTRL_gBLMC18-TOP3A-PICH-07.czi												TOP3A	5	0.1	3085	224.9	2827.6	3552.2	2.2
	Background	PICH	1	0.3	1006.4	28.5	946.4	1093.2	5.1				BLM	6	0.1	3747	154.9	3457.8	4123.9	2.2
	Background	TOP3A	2	0.3	3303.5	260.2	2807.7	3967.8	5.1				PICH	7	0.2	1013.1	84.3	843.2	1139	2.5
	Background	BLM	3	0.3	4427.3	171.2	4095.5	4942.9	5.1				TOP3A	8	0.2	2537.1	60	2424.3	2673.1	2.5
		PICH	4	0.2	1634	192.1	1393	2089.8	3.8				BLM	9	0.2	3558.3	189.7	3274	3929.5	2.5
		TOP3A	5	0.2	5260.3	501	4158	6220	3.8				PICH	10	0.1	1241.8	145.3	969.5	1475.3	2.1
		BLM	6	0.2	5335	361.7	4786.9	6112.1	3.8				TOP3A	11	0.1	2791.8	196.6	2485.7	3183.9	2.1
		PICH	7	0.2	1441.9	180.2	1238.1	1973	2.6				BLM	12	0.1	3796.7	251.8	3431.1	4344.6	2.1
		TOP3A	8	0.2	5088.1	1185.4	4358.9	9397	2.6				PICH	13	0.3	1232.1	104	1086	1502.2	4.3
		BLM	9	0.2	5874.4	944.6	4973.7	9099.5	2.6				TOP3A	14	0.3	2732.1	152.6	2440.9	3066.1	4.3
		PICH	10	0.2	1540.2	200.2	1153	1959.1	3.8				BLM	15	0.3	3931.6	130.8	3645.1	4204.7	4.3
		TOP3A	11	0.2	4376.1	651.5	3246.7	5802.8	3.8				PICH	16	0.5	1246.3	210.9	946.6	1745	8.4
		BLM	12	0.2	5245.3	586.6	4416	6970.3	3.8				TOP3A	17	0.5	2924.1	445.2	2329.2	4201	8.4
		PICH	13	0.2	1510	222.5	1193	1984.3	3.5				BLM	18	0.5	3996.3	460.6	3375.7	4914.4	8.4
		TOP3A	14	0.2	4796.2	625.3	3934	6304.2	3.5				PICH	19	0.4	1432.9	289.1	981	2052.6	6.9
		BLM	15	0.2	5394.2	493.3	4704.6	6629.3	3.5				TOP3A	20	0.4	3144.5	443.7	2510	4194.9	6.9
		PICH	16	0.3	1522.5	101.6	1328.2	1831.9	5.1				BLM	21	0.4	4267.2	569.3	3360.1	5882	6.9
		TOP3A	17	0.3	6485.5	973.9	4907.4	9034.9	5.1				PICH	22	0.2	1438.2	148.8	1090.2	1724.2	2.8
		BLM	18	0.3	5817.2	527	5008.9	7108.7	5.1				TOP3A	23	0.2	3606.6	362.5	3142.6	4674.6	2.8
		PICH	19	0.2	1528	117	1332.7	1768.7	3.8				BLM	24	0.2	4321.5	442.4	3670.6	5433	2.8
		TOP3A	20	0.2	6731.1	734.8	4981.5	8796.1	3.8				PICH	25	0.3	1471.5	157.1	1224.2	1768.6	4.5
		BLM	21	0.2	5702.7	425.4	4984.8	6722.8	3.8				TOP3A	26	0.3	3359.4	366.7	2834.7	4004.4	4.5
		PICH	22	0.2	1715.1	311.1	1198.1	2316.3	3.6				BLM	27	0.3	4672.3	394.7	4003.3	5591.3	4.5
		TOP3A	23	0.2	6347.3	918.6	4038.5	8278.9	3.6				PICH	28	0.3	1592.4	168.7	1171.8	1879.9	4.8
		BLM	24	0.2	5894.5	577.8	4745.5	6815.5	3.6				TOP3A	29	0.3	3427.5	283.9	2944	4175.3	4.8
		PICH	25	0.2	1917.3	231.5	1354.9	2286.8	2.3				BLM	30	0.3	4472.1	333	3845.1	5003.1	4.8
		TOP3A	26	0.2	5912.8	742.1	4910.9	7525.4	2.3				PICH	31	0.2	1537.1	180.3	1177	1811.5	3.8
		BLM	27	0.2	6236.3	376.1	5159	6735.4	2.3				TOP3A	32	0.2	3454.9	245.6	2993	4222.8	3.8
		PICH	28	0.2	1705.1	264.7	1240.6	2300	3.7				BLM	33	0.2	4390.4	313	3820	5019.9	3.8
		TOP3A	29	0.2	5669.9	1030.5	3845	7227.9	3.7				PICH	34	0.5	1429.3	171.7	1094	1744.2	7.6
		BLM	30	0.2	6345.8	776	5251.9	7916.9	3.7				TOP3A	35	0.5	3315.7	348.9	2688	4323.4	7.6
		PICH	31	0.2	1417.9	84.5	1229	1588.4	3.6				BLM	36	0.5	4391.4	382.2	3768.1	5355	7.6
		TOP3A	32	0.2	5017.2	578.5	3797	6098.7	3.6				PICH	37	0.3	1488.1	91.7	1212	1674.6	4
		BLM	33	0.2	5491.3	448.3	4498	6487.6	3.6				TOP3A	38	0.3	3416.5	359.4	2709	4177.1	4
													BLM	39	0.3	4241.7	216.2	3812	4828.2	4
	U2OS_siCTRL_gBLMC18-TOP3A-PICH-09.czi												PICH	40	0.3	1289.1	125.6	1075.2	1546.3	4.9
	Background	PICH	1	0.3	963.2	23.9	914.5	1027	4				TOP3A	41	0.3	3001.2	351.3	2510.7	4041.6	4.9
	Background	TOP3A	2	0.3	3283.2	464.8	2862.7	4417.5	4				BLM	42	0.3	4017	275.9	3558.1	4677.3	4.9
	Background	BLM	3	0.3	3657.6	127.3	3421.9	3898.5	4				PICH	43	0.2	1109.9	109.8	971.8	1444.2	3.8
		PICH	4	0.2	1029.6	41.2	965.7	1119.4	2.4				TOP3A	44	0.2	2533	163.8	2319.7	2856.6	3.8
		TOP3A	5	0.2	3726.1	514.8	3071	5170.4	2.4				BLM	45	0.2	3653.6	218.6	3382.2	4168.9	3.8
		BLM	6	0.2	4232.9	331.8	3716	5040.5	2.4
		PICH	7	0.2	1081.3	74	979.7	1223.1	3.7			U2OS_siTOP3A_gBLMC18-TOP3A-PICH-10.czi
		TOP3A	8	0.2	3841.4	404.3	3111	4737.8	3.7			Background	PICH	1	2.4	907.8	43.3	800.6	1048.8	36.9
		BLM	9	0.2	4102.5	317	3485.8	4688.9	3.7			Background	TOP3A	2	2.4	3362.2	409.5	2688.4	5316.4	36.9
		PICH	10	0.4	1164.2	87	982.4	1371	5.5			Background	BLM	3	2.4	4330.3	860.9	3342.2	7005.5	36.9
		TOP3A	11	0.4	4357.3	692	3485	6656.6	5.5				PICH	4	0.2	1276	81.7	1058	1494.4	3.1
		BLM	12	0.4	4362.7	250.6	3986	4941	5.5				TOP3A	5	0.2	3622.1	444.5	3128.6	4633.5	3.1
		PICH	13	0.3	1288.8	112.4	1098	1518.8	4.2				BLM	6	0.2	3980	92.8	3810.7	4156.2	3.1
		TOP3A	14	0.3	5272	630.5	4126.5	6981.5	4.2				PICH	7	0.2	1297.3	99.3	1065.4	1525	2.9
		BLM	15	0.3	4706.6	322.5	4158.4	5313.6	4.2				TOP3A	8	0.2	3534	404.1	3124	4617.8	2.9
		PICH	16	0.3	1246	91.7	1059	1431	4.5				BLM	9	0.2	4184.7	265.1	3792	5032.2	2.9
		TOP3A	17	0.3	4811.8	341	4018.9	5893.9	4.5				PICH	10	0.2	1216.9	123.8	1002	1447.7	3.6
		BLM	18	0.3	4705.2	412.9	3973.3	5623.2	4.5				TOP3A	11	0.2	3324.5	152.3	2964.5	3750	3.6
		PICH	19	0.2	1325.2	78	1159.9	1483.1	2.5				BLM	12	0.2	4069.5	196.3	3801.3	4593.7	3.6
		TOP3A	20	0.2	4697.9	210.5	4325.5	5304.5	2.5				PICH	13	0.2	1317	119.1	1124.3	1544.6	3.7
		BLM	21	0.2	4768.9	321.8	4204	5359.9	2.5				TOP3A	14	0.2	3490	319.6	2940	4091	3.7
		PICH	22	0.4	1226.4	71.7	1095.7	1441.9	6.6				BLM	15	0.2	4183.4	126.9	3919.4	4386.4	3.7
		TOP3A	23	0.4	4408.1	473.3	3285.3	5424.4	6.6				PICH	16	0.3	1416.5	138	1120.6	1701.6	5
		BLM	24	0.4	4416.3	237.2	3848.5	5188.4	6.6				TOP3A	17	0.3	3976.7	367.7	3368.2	5143.2	5
		PICH	25	0.6	1115.1	84.7	971.7	1418.7	8.5				BLM	18	0.3	4273	162.3	3960	4608	5
		TOP3A	26	0.6	3678	328	3169.6	4442.8	8.5				PICH	19	0.3	1444.2	218.5	1084	1960.1	4.3
		BLM	27	0.6	4196.9	235.8	3807.7	4926.6	8.5				TOP3A	20	0.3	3823.2	252.9	3335	4587.3	4.3
		PICH	28	0.1	1121.1	83.9	997.8	1239.8	1.2				BLM	21	0.3	4727.2	401.9	4108.4	5885	4.3
		TOP3A	29	0.1	4220.3	787.5	3467.2	5644	1.2				PICH	22	0.2	1679.5	138.3	1353.2	1971.8	2.5
		BLM	30	0.1	4926.5	490.2	3976.8	5757	1.2				TOP3A	23	0.2	4174.2	508.1	3581.6	5584.8	2.5
													BLM	24	0.2	4987.7	207.7	4480	5351	2.5
	U2OS_siCTRL_gBLMC18-TOP3A-PICH-10.czi												PICH	25	0.3	1276.9	137.5	960.7	1533.5	5.3
	Background	PICH	1	0.5	908.2	21.3	845.4	980.4	7				TOP3A	26	0.3	3896.6	334.4	3060.7	4800.4	5.3
	Background	TOP3A	2	0.5	3429.9	247.4	3056.3	4437.1	7				BLM	27	0.3	4961.8	377	4221.7	5621.6	5.3
	Background	BLM	3	0.5	3777.9	149.3	3456.6	4198.2	7
		PICH	4	0.3	1046.6	66.8	937.6	1159	4.2			U2OS_siTOP3A_gBLMC18-TOP3A-PICH-11.czi
		TOP3A	5	0.3	5225.5	982.8	3629.1	7510.2	4.2			Background	PICH	1	1.2	912.4	30.4	855.8	1022.4	18.2
		BLM	6	0.3	4605.7	365.1	3844.3	5487	4.2			Background	TOP3A	2	1.2	2897.8	342.7	2332.1	3985.8	18.2
		PICH	7	0.5	1109.4	79.5	979.5	1374.1	7			Background	BLM	3	1.2	3771.7	216.3	3352.9	4476	18.2
		TOP3A	8	0.5	5433	1071.1	3906	7582.6	7				PICH	4	0.3	1202.2	77	1063.1	1404	3.9
		BLM	9	0.5	4999.7	388.9	4125.2	5844.8	7				TOP3A	5	0.3	2826.6	359.3	2360.8	4028.5	3.9
		PICH	10	0.4	1269.9	127.3	1028.2	1669.8	6.4				BLM	6	0.3	4176.1	244.8	3794.9	4706	3.9
		TOP3A	11	0.4	5358.9	673.7	4235.4	7194.4	6.4				PICH	7	0.4	1372.5	140.4	1053.8	1653.9	6.9
		BLM	12	0.4	5068.6	408.5	4368.1	6518.1	6.4				TOP3A	8	0.4	2607.9	229.5	2247.9	3249.4	6.9
		PICH	13	0.4	1169.6	101.4	992.1	1396.5	5.4				BLM	9	0.4	4303.4	355.8	3564.3	5106.9	6.9
		TOP3A	14	0.4	5619	524	4437	6797.3	5.4				PICH	10	0.3	1314	101.5	1109	1480.7	4.1
		BLM	15	0.4	5111.4	197.4	4622	5482.4	5.4				TOP3A	11	0.3	2697.1	117.1	2414.8	2954.5	4.1
		PICH	16	0.3	1069	25.1	1023.2	1156.8	3.9				BLM	12	0.3	4432.9	433.2	3680.4	5262	4.1
		TOP3A	17	0.3	5235	357.7	4520.5	6097.4	3.9				PICH	13	0.5	1269.6	118.8	959	1563.8	7.7
		BLM	18	0.3	4832.8	152.4	4531.7	5246.5	3.9				TOP3A	14	0.5	2843.5	291.4	2434.7	3584.3	7.7
		PICH	19	0.3	1018	52.9	913	1177.3	5				BLM	15	0.5	4024.7	274.3	3518.4	4680.1	7.7
		TOP3A	20	0.3	4440.4	513.6	3387.6	5483	5				PICH	16	0.5	1359	148.6	1075.1	1668.1	7
		BLM	21	0.3	4404.9	248.6	3914.4	5268.5	5				TOP3A	17	0.5	2931	322.5	2379	3901.4	7
		PICH	22	0.3	1049.4	72.5	906.9	1290.5	4.6				BLM	18	0.5	4302.4	376.2	3611.9	5043.3	7
		TOP3A	23	0.3	4090.5	659.9	2930	6123.6	4.6				PICH	19	0.4	1432.7	123.8	1145.8	1684.1	5.5
		BLM	24	0.3	4455.3	295.8	3703	5479.4	4.6				TOP3A	20	0.4	2882.1	277.3	2463	3749.9	5.5
		PICH	25	0.2	973.1	51.9	875.6	1097.7	2.5				BLM	21	0.4	4285	269.5	3794.5	4955.1	5.5
		TOP3A	26	0.2	3948.3	309.4	3203.8	4531.7	2.5				PICH	22	0.4	1338.8	105.7	1142.6	1589.8	6.6
		BLM	27	0.2	4109.3	186.2	3801.7	4641	2.5				TOP3A	23	0.4	2837.9	380	2376.2	4372.5	6.6
													BLM	24	0.4	4146.5	244.6	3691.5	4534.7	6.6
	U2OS_siCTRL_gBLMC18-TOP3A-PICH-11.czi												PICH	25	0.5	1457.2	161.7	1172.3	1757	7.4
	Background	PICH	1	0.8	976	24.3	904.7	1048.9	11.7				TOP3A	26	0.5	2667.8	150	2365.4	2980.9	7.4
	Background	TOP3A	2	0.8	4106.1	813.3	3140	8540.5	11.7				BLM	27	0.5	4436.6	472.9	3520.3	5426.2	7.4
	Background	BLM	3	0.8	4314.5	138.8	4003.7	4781.5	11.7				PICH	28	0.4	1512.3	115.6	1220.8	1808.4	5.6
		PICH	4	0.3	1189.7	91.9	1052.7	1401.6	4.8				TOP3A	29	0.4	2726.3	104.1	2457.1	2993.9	5.6
		TOP3A	5	0.3	4617.5	330.8	4087.3	5506.2	4.8				BLM	30	0.4	4605.7	346.2	3891	5595.5	5.6
		BLM	6	0.3	4945	296.9	4586.8	5914.7	4.8				PICH	31	0.4	1550.8	177.9	1193.8	1934.9	6.8
		PICH	7	0.4	1046.5	48.4	949.9	1151.6	6.3				TOP3A	32	0.4	2855.7	273.7	2429.1	4002	6.8
		TOP3A	8	0.4	4049.8	507.4	3012.8	4972.3	6.3				BLM	33	0.4	4640.2	336.2	3901	5544.3	6.8
		BLM	9	0.4	4511.1	277.9	3938.8	5210.2	6.3				PICH	34	0.4	1397.5	163	1155	1876.3	6.7
													TOP3A	35	0.4	2718.9	197.3	2356	3380.9	6.7
	U2OS_siCTRL_gBLMC18-TOP3A-PICH-14.czi												BLM	36	0.4	4165.1	302.2	3726.7	5052.6	6.7
	Background	PICH	1	0.4	969.9	22	920.5	1023.8	6.6				PICH	37	0.5	1113.4	46.9	1009.4	1260	7.9
	Background	TOP3A	2	0.4	2975.2	200.3	2703.5	3581.1	6.6				TOP3A	38	0.5	2511.2	289.1	2212.3	3534.2	7.9
	Background	BLM	3	0.4	4344	226	4008.3	4953.2	6.6				BLM	39	0.5	3770.8	98.7	3578.9	3988	7.9
		PICH	4	0.4	1420.2	237.8	1069.8	2040.5	6.2
		TOP3A	5	0.4	5236	692.2	3835.6	6684.1	6.2			U2OS_siTOP3A_gBLMC18-TOP3A-PICH-12.czi
		BLM	6	0.4	5742.3	593.2	4724.5	7040.9	6.2			Background	PICH	1	0.3	1100.1	34.6	1023.4	1196	5
		PICH	7	0.2	1279.6	100.7	1078.6	1508.6	2.3			Background	TOP3A	2	0.3	4077.9	342.5	3594.6	5368.3	5
		TOP3A	8	0.2	4823.9	606.6	3376	5592.5	2.3			Background	BLM	3	0.3	4698.1	138.4	4420	5066.5	5
		BLM	9	0.2	5717.1	333.4	4742	6182.5	2.3				PICH	4	0.4	1254.2	78.9	1077	1443.7	5.9
		PICH	10	0.2	1357.3	143.2	1098.2	1716.1	2.9				TOP3A	5	0.4	3708.9	282.9	3369	4868.3	5.9
		TOP3A	11	0.2	5380.8	1213.6	4119	8782.2	2.9				BLM	6	0.4	4885	227.8	4420.2	5352.6	5.9
		BLM	12	0.2	5213	496.8	4508.2	6443	2.9				PICH	7	0.5	1439.4	89.6	1229.8	1617	8.1
		PICH	13	0.2	1295.1	108	1116.1	1560	3.4				TOP3A	8	0.5	4341.1	438.4	3460.8	6238.4	8.1
		TOP3A	14	0.2	4850.3	770.6	3849.5	7108.9	3.4				BLM	9	0.5	5291.2	460.2	4262	6429.7	8.1
		BLM	15	0.2	5427.1	486.9	4710	6727.6	3.4				PICH	10	0.3	1415.7	114.6	1175.1	1771.9	5.2
													TOP3A	11	0.3	4321.9	433.2	3234.7	5144.3	5.2
	U2OS_siCTRL_gBLMC18-TOP3A-PICH-15.czi												BLM	12	0.3	5162.7	334.1	4256.9	5922.6	5.2
	Background	PICH	1	0.5	974.1	23.2	923.1	1031.9	8.1				PICH	13	0.5	1445.1	116.3	1243.2	1802	7.4
	Background	TOP3A	2	0.5	3721.5	209.2	3353	4152.5	8.1				TOP3A	14	0.5	4163.8	277	3548.4	5026.7	7.4
	Background	BLM	3	0.5	4068.1	103.9	3856.7	4343.7	8.1				BLM	15	0.5	5221	311.1	4686.7	6506	7.4
		PICH	4	0.6	1253.2	150.5	1009.9	1662.6	9.5				PICH	16	0.4	1325.9	145.4	1067	1641.7	6
		TOP3A	5	0.6	4412	561.5	3469.7	5454.9	9.5				TOP3A	17	0.4	4136.4	410.1	3283	5065.1	6
		BLM	6	0.6	4920.9	564.4	4126.9	6413	9.5				BLM	18	0.4	5004.9	355.1	4215	5811.4	6
													PICH	19	0.4	1538.4	162.2	1105	1862.7	5.6
	U2OS_siCTRL_gBLMC18-TOP3A-PICH-19.czi												TOP3A	20	0.4	4142.9	451.8	3246.5	5405.2	5.6
	Background	PICH	1	0.6	914.9	22.5	877.5	1014.8	9.4				BLM	21	0.4	5422.6	413.6	4645.7	6266.4	5.6
	Background	TOP3A	2	0.6	3072.6	211.4	2796.6	3797.9	9.4				PICH	22	0.3	1411.8	116.2	1220.4	1745.6	5
	Background	BLM	3	0.6	4508.9	101.1	4310	4832.1	9.4				TOP3A	23	0.3	4074.7	433.1	3430.8	5040.4	5
		PICH	4	0.2	1036.3	42.8	945.7	1165.1	3.3				BLM	24	0.3	4996.2	259.4	4633.8	5542.6	5
		TOP3A	5	0.2	3033.8	139.3	2791.4	3331.6	3.3
		BLM	6	0.2	4750.5	194.2	4363	5342.3	3.3			U2OS_siTOP3A_gBLMC18-TOP3A-PICH-14.czi
		PICH	7	0.2	1159.9	96.8	1024.9	1359	3.3			Background	PICH	1	1.2	927.2	25.7	865.4	1000	18.6
		TOP3A	8	0.2	3847.3	361.9	3106.9	4270.1	3.3			Background	TOP3A	2	1.2	3122.2	225.8	2671.2	3856.9	18.6
		BLM	9	0.2	5468.2	266.8	4956.5	5984.7	3.3			Background	BLM	3	1.2	4134	188.9	3768.5	4698.3	18.6
		PICH	10	0.4	1152.6	98.6	1014.5	1596.7	6.1				PICH	4	0.2	1168	111.8	947	1365.5	3.2
		TOP3A	11	0.4	4992.6	714.8	3636.9	6534.7	6.1				TOP3A	5	0.2	2549.5	225	2312.9	3384.3	3.2
		BLM	12	0.4	5828.3	515.2	4786	7515.5	6.1				BLM	6	0.2	3986.2	311.6	3376.8	4485.6	3.2
		PICH	13	0.2	1255.3	116.3	1095.6	1577.5	3.5				PICH	7	0.2	1211	113.1	1044.1	1462.6	2.8
		TOP3A	14	0.2	4824.2	422.3	4036.4	5519.6	3.5				TOP3A	8	0.2	2531.2	121.4	2355.9	2840.2	2.8
		BLM	15	0.2	6297.9	530	5151	7033.8	3.5				BLM	9	0.2	3843.2	157.9	3544.4	4120.1	2.8
		PICH	16	0.3	1151.2	77.6	1006.1	1306.3	3.9				PICH	10	0.2	1489.9	147.1	1134.9	1733	2.8
		TOP3A	17	0.3	4475.3	368.1	3550	4987	3.9				TOP3A	11	0.2	2707.8	139.2	2479.6	2961	2.8
		BLM	18	0.3	5574.8	345.1	5002.9	6321.1	3.9				BLM	12	0.2	4198.7	207.3	3823.3	4746	2.8
		PICH	19	0.4	1176.6	92.5	1038.9	1375.7	5.6				PICH	13	0.3	1382.7	93.3	1229	1647	4
		TOP3A	20	0.4	4518.5	913	3142.6	6756.7	5.6				TOP3A	14	0.3	2690.6	206.9	2371.9	3160	4
		BLM	21	0.4	6005.9	724.2	4739.6	7438.5	5.6				BLM	15	0.3	4238.3	228	3780.6	4683.5	4
		PICH	22	0.4	1214.4	67.5	1033.1	1372	5.6				PICH	16	0.2	1470	113.9	1220.7	1746	2.7
		TOP3A	23	0.4	4397.3	512.9	3414.1	5694.6	5.6				TOP3A	17	0.2	2647.1	322.9	2328.6	3591	2.7
		BLM	24	0.4	5502.2	398.6	4829.9	6960.6	5.6				BLM	18	0.2	4350.2	292.9	3851.9	5098	2.7
		PICH	25	0.4	1178.1	65.8	1030.5	1311.6	6.9				PICH	19	0.1	1412.9	126.7	1134.4	1601.7	2.2
		TOP3A	26	0.4	4415.1	686.1	3180.7	6192.7	6.9				TOP3A	20	0.1	2635	151.6	2392.3	2912.3	2.2
		BLM	27	0.4	5348.1	454.9	4644.9	6698.8	6.9				BLM	21	0.1	4114.2	103.7	3880.3	4379	2.2
		PICH	28	0.3	1135.9	52.9	1020.6	1246	4.6				PICH	22	0.2	1352.4	90	1157.1	1536.9	2.8
		TOP3A	29	0.3	4115.7	935.5	3133.5	6472.2	4.6				TOP3A	23	0.2	2641.7	139.6	2421.6	2944.6	2.8
		BLM	30	0.3	5218.9	531.9	4508.4	6317.2	4.6				BLM	24	0.2	4096.4	125.2	3872.2	4437.4	2.8
													PICH	25	0.2	1389.8	149.5	1068.4	1749.1	3.3
	U2OS_siCTRL_gBLMC18-TOP3A-PICH-22.czi												TOP3A	26	0.2	2709.4	284.4	2269.6	3417.7	3.3
	Background	PICH	1	1.1	904.6	19.4	865.6	971.2	16.4				BLM	27	0.2	4270.9	252.8	3733.4	4697.4	3.3
	Background	TOP3A	2	1.1	2352.6	242.4	2030.4	3344.8	16.4				PICH	28	0.2	1532	158.4	1182.8	1783.4	3.3
	Background	BLM	3	1.1	3750.2	109.2	3463.6	4069.7	16.4				TOP3A	29	0.2	2966.6	119.5	2670	3220.7	3.3
		PICH	4	0.1	1120.9	75.2	1011.8	1278	1.9				BLM	30	0.2	4583.5	195	4185	4999.3	3.3
		TOP3A	5	0.1	2738.4	210.1	2382.3	3133.3	1.9				PICH	31	0.2	1383.8	140.5	1217.6	1658.9	3.4
		BLM	6	0.1	4235.7	332	3897.8	4952.2	1.9				TOP3A	32	0.2	2965	245.3	2564.2	3495.1	3.4
		PICH	7	0.2	1208	94.9	1046.6	1454.4	3.6				BLM	33	0.2	4310.7	321.8	3692.2	4825	3.4
		TOP3A	8	0.2	2839.7	282.7	2404.7	3418.4	3.6				PICH	34	0.2	1259.5	48	1159	1368.4	2.3
		BLM	9	0.2	4458.9	215.1	4048.6	4868.4	3.6				TOP3A	35	0.2	2750.8	128.8	2581	3001.7	2.3
		PICH	10	0.2	1371.5	105.7	1177.2	1628	3.1				BLM	36	0.2	4093.4	117.7	3855.8	4355.5	2.3
		TOP3A	11	0.2	3277.7	229	2943.6	3703.2	3.1
		BLM	12	0.2	4737.1	235.4	4255.1	5325.8	3.1			U2OS_siTOP3A_gBLMC18-TOP3A-PICH-15.czi
		PICH	13	0.2	1321.5	104.3	1138.8	1512	2.9			Background	PICH	1	3.3	922.5	31.7	839.3	1060.2	50.5
		TOP3A	14	0.2	3569.4	507.5	2809.8	4452	2.9			Background	TOP3A	2	3.3	2703.7	370.5	2033.9	4182.5	50.5
		BLM	15	0.2	5034.4	516.5	4119.9	5812.7	2.9			Background	BLM	3	3.3	4475.1	274.6	3848.1	5273.4	50.5
		PICH	16	0.1	1550.9	138.4	1327	1738.3	2.2				PICH	4	0.2	1395.8	149.8	1114.8	1628.6	3.2
		TOP3A	17	0.1	3958.4	471.1	3138	4695.8	2.2				TOP3A	5	0.2	2885.2	266	2308.3	3456	3.2
		BLM	18	0.1	5515.9	421.3	4809.5	6253.4	2.2				BLM	6	0.2	4887.1	252.6	4448	5532.2	3.2
		PICH	19	0.4	1484.5	281.8	1128.6	2069.7	5.8				PICH	7	0.4	1433.3	195.9	1027	1797.2	5.9
		TOP3A	20	0.4	4210.5	968.6	2907	6452.8	5.8				TOP3A	8	0.4	2783.2	419.7	2332.2	4045.7	5.9
		BLM	21	0.4	5463.3	786.8	4201	7222.1	5.8				BLM	9	0.4	5167.5	494.7	4307	6481	5.9
		PICH	22	0.3	1548.7	288.8	1182	2211.1	5.3				PICH	10	0.4	1440.5	220.5	1116	2054.6	5.4
		TOP3A	23	0.3	4368.5	896.3	3188.6	6293.4	5.3				TOP3A	11	0.4	2733.9	280.2	2351.1	3480.3	5.4
		BLM	24	0.3	5784	677.6	4804.3	7075.5	5.3				BLM	12	0.4	5105.8	534.4	4341.2	6432.6	5.4
		PICH	25	0.4	1360.1	114.2	1058.2	1579	6.5				PICH	13	0.3	1677.2	234.2	1239.9	2116.2	4.6
		TOP3A	26	0.4	4077.4	511.2	2940.3	5169.8	6.5				TOP3A	14	0.3	2767	316.8	2377.1	3920.2	4.6
		BLM	27	0.4	5156.1	331.8	4236.1	6295.5	6.5				BLM	15	0.3	4965.9	210.1	4522.7	5441.4	4.6
		PICH	28	0.4	1474.2	161.9	1147.7	1716.8	5.7				PICH	16	0.4	1626.2	271.6	1173	2195	5.9
		TOP3A	29	0.4	4814.9	845.1	3255.5	6731.5	5.7				TOP3A	17	0.4	2693.2	312.6	2338.3	3657.4	5.9
		BLM	30	0.4	5767.4	577.6	4851.7	6935.3	5.7				BLM	18	0.4	4829.6	233	4470.5	5446.5	5.9
		PICH	31	0.3	1562.1	215.2	1259.8	1937.1	4.8				PICH	19	0.3	1455.4	252.7	1037.4	2168.4	4.6
		TOP3A	32	0.3	4667.6	582.9	3661.6	5855	4.8				TOP3A	20	0.3	2419.8	160.1	2209.5	2940.3	4.6
		BLM	33	0.3	5482.4	457.6	4642	6649.9	4.8				BLM	21	0.3	4775.4	236.8	4388.1	5227	4.6
		PICH	34	0.4	1473.6	225.5	1192.1	1882.9	5.6				PICH	22	0.2	1512.8	241.2	1121.9	1986.3	3.1
		TOP3A	35	0.4	4306.9	595.5	3370.8	5352.9	5.6				TOP3A	23	0.2	2343.4	89.9	2198.8	2539.1	3.1
		BLM	36	0.4	5312.1	566.1	4489.7	6395.3	5.6				BLM	24	0.2	4597.5	142.8	4302.8	4936.8	3.1
		PICH	37	0.2	1532.5	164.3	1260.3	1894.6	3.6				PICH	25	0.4	1230.8	119.3	987.1	1512.9	6.1
		TOP3A	38	0.2	4006.2	421.2	3236	4842.7	3.6				TOP3A	26	0.4	2332.1	110.9	2145.9	2573.8	6.1
		BLM	39	0.2	5372.5	346.5	4726.3	6086.9	3.6				BLM	27	0.4	4471.6	163.5	4197.9	4992.3	6.1
		PICH	40	0.3	1460.3	172.4	1130.3	1751.5	4.2
		TOP3A	41	0.3	4280.1	492.2	3240.6	5234.3	4.2			U2OS_siTOP3A_gBLMC18-TOP3A-PICH-16.czi
		BLM	42	0.3	5324.1	559.8	4317.7	6429.2	4.2			Background	PICH	1	0.9	858.1	27.6	797.8	938.3	13.8
		PICH	43	0.3	1489.7	155.6	1205.2	1830.5	5.1			Background	TOP3A	2	0.9	2904	269.6	2427.9	3966.3	13.8
		TOP3A	44	0.3	3633.9	371.5	3065	4511.8	5.1			Background	BLM	3	0.9	3492.7	109.6	3242.9	3838.1	13.8
		BLM	45	0.3	5186.7	390.9	4315	5978.6	5.1				PICH	4	0.3	1107	129.5	903	1366.6	4.6
		PICH	46	0.2	1336	239.3	1006.7	1820.8	3.8				TOP3A	5	0.3	3317.9	411.7	2643	4022.5	4.6
		TOP3A	47	0.2	3310.7	578.9	2597.7	4459.9	3.8				BLM	6	0.3	3837.7	227.4	3464	4442.7	4.6
		BLM	48	0.2	4936.5	467	4139	5923.3	3.8				PICH	7	0.3	1305.9	140.2	956.5	1603.2	5.3
													TOP3A	8	0.3	3294.5	512.4	2465	4818.7	5.3
	U2OS_siCTRL_gBLMC18-TOP3A-PICH-26.czi												BLM	9	0.3	4135.6	309.8	3432.6	5014.6	5.3
	Background	PICH	1	0.7	1060.2	29.9	1002.4	1136.5	11.2				PICH	10	0.3	1198.8	74.5	1029	1332	4.3
	Background	TOP3A	2	0.7	3548.2	470.4	2757.8	5120.5	11.2				TOP3A	11	0.3	3258.9	362.8	2630	4134.1	4.3
	Background	BLM	3	0.7	4014.3	166.8	3689.1	4470.3	11.2				BLM	12	0.3	3932.3	165.2	3627.5	4299.8	4.3
		PICH	4	0.2	1420	121.2	1207.6	1684.2	3.4				PICH	13	0.2	1342.9	145.8	1089.6	1610.5	3.7
		TOP3A	5	0.2	4172.4	386	3585.3	5172.3	3.4				TOP3A	14	0.2	3478.4	430.2	2629	4699	3.7
		BLM	6	0.2	4875.1	415.4	4205.4	5683.6	3.4				BLM	15	0.2	4234	222.6	3879.9	4694.1	3.7
		PICH	7	0.2	1429.7	81.7	1204.9	1577.6	2.9				PICH	16	0.5	1153.3	144.4	918.8	1480.2	7.9
		TOP3A	8	0.2	4450.1	469.9	3697.8	5451.1	2.9				TOP3A	17	0.5	3174.8	476.5	2447	5143.5	7.9
		BLM	9	0.2	4979	280.4	4293	5431.5	2.9				BLM	18	0.5	3926.4	275	3483	4517.3	7.9
		PICH	10	0.2	1334.1	102.3	1150	1560.6	3.6				PICH	19	0.3	1389.2	163	1115	1694.1	4.3
		TOP3A	11	0.2	4595.6	533.1	3817.8	5930.4	3.6				TOP3A	20	0.3	3089.5	259.9	2678	3750.6	4.3
		BLM	12	0.2	4863.7	373.9	4178.7	5520.6	3.6				BLM	21	0.3	4194.4	296.3	3796.2	4820.6	4.3
		PICH	13	0.4	1321.6	81.3	1175.5	1539.1	5.5				PICH	22	0.2	1284.5	83.5	1123.3	1439.9	3.5
		TOP3A	14	0.4	5378.4	809.6	3934	6665.8	5.5				TOP3A	23	0.2	3022	174.8	2672	3309.5	3.5
		BLM	15	0.4	5158.2	417.8	4462.8	6203.1	5.5				BLM	24	0.2	3909	189.5	3580	4439.4	3.5
		PICH	16	0.4	1340.5	124.3	1105.9	1562.3	5.6				PICH	25	0.3	1240.4	90.4	989	1427.3	5
		TOP3A	17	0.4	5814.6	711.1	3906.1	7182.2	5.6				TOP3A	26	0.3	3164.8	619.1	2427	5260.8	5
		BLM	18	0.4	5163	496.8	4407.7	6053.7	5.6				BLM	27	0.3	3827.4	215	3357	4176	5
		PICH	19	0.3	1424.3	74.2	1219.1	1532.9	4.1				PICH	28	0.4	1217.6	76.3	1051	1406	5.3
		TOP3A	20	0.3	5624.9	678.5	4410.3	6616.3	4.1				TOP3A	29	0.4	2906.2	148.4	2589	3301.3	5.3
		BLM	21	0.3	5046.3	325.8	4440.2	6077	4.1				BLM	30	0.4	3862.9	256.1	3477	4634.5	5.3
		PICH	22	0.2	1355	112.1	1179.1	1604.5	2.4				PICH	31	0.3	1171.3	61.5	1020.5	1279.3	4.4
		TOP3A	23	0.2	4592.4	301.2	3954.3	5002	2.4				TOP3A	32	0.3	2951.8	222.7	2435	3477.9	4.4
		BLM	24	0.2	4710.4	316.8	4314.8	5360	2.4				BLM	33	0.3	3680.1	218.3	3290	4311.5	4.4
		PICH	25	0.2	1275.1	55	1174.8	1399.3	2.9				PICH	34	0.3	1148.4	129.9	937.3	1446.5	5.1
		TOP3A	26	0.2	5583.4	573.1	4616.3	6506.1	2.9				TOP3A	35	0.3	2760.4	203.6	2419.5	3345.1	5.1
		BLM	27	0.2	4943.2	195	4589.9	5488.6	2.9				BLM	36	0.3	3633.8	162.9	3349.8	3933.5	5.1
													PICH	37	0.2	1112.7	124.1	869	1386	3.7
													TOP3A	38	0.2	2667.2	171.9	2358.4	3169.8	3.7
													BLM	39	0.2	3634.1	159.3	3216.6	3937.3	3.7
												U2OS_siTOP3A_gBLMC18-TOP3A-PICH-17.czi
												Background	PICH	1	1.1	885.3	22.6	829	952.3	16.2
												Background	TOP3A	2	1.1	2931.8	203.2	2598.6	3859.3	16.2
												Background	BLM	3	1.1	4171	169.5	3840.4	4851.1	16.2
													PICH	4	0.2	1142	56.9	1020	1260.2	3.6
													TOP3A	5	0.2	2479.1	78.2	2367.8	2680.1	3.6
													BLM	6	0.2	4173.8	242.1	3894.1	5020.4	3.6
													PICH	7	0.2	1354.7	108.9	1127	1541.2	2.9
													TOP3A	8	0.2	2962.7	253.7	2611.6	3588	2.9
													BLM	9	0.2	4518.7	218.6	4185	5012.9	2.9
													PICH	10	0.4	1258.1	116	1042.1	1497.5	6.7
													TOP3A	11	0.4	3224.3	287.5	2837	4002.7	6.7
													BLM	12	0.4	4532.5	289.5	4230.1	5783.2	6.7
													PICH	13	0.4	1303.5	101.8	1118	1517	5.6
													TOP3A	14	0.4	3246.6	244.8	2894.8	4036.6	5.6
													BLM	15	0.4	4617.8	165.5	4325.9	5189.5	5.6
													PICH	16	0.3	1271.7	69.6	1129.6	1434.4	4.9
													TOP3A	17	0.3	3335.2	367.2	2921.2	4715.3	4.9
													BLM	18	0.3	4602.4	197.2	4199	5247.7	4.9
													PICH	19	0.4	1414.5	166.3	1178.1	1839.6	6.2
													TOP3A	20	0.4	3406.3	253.9	2863.8	4112	6.2
													BLM	21	0.4	4782	212.8	4443.3	5469.7	6.2
													PICH	22	0.3	1386.2	89.8	1198.3	1626.5	3.9
													TOP3A	23	0.3	3279	228.1	2962.6	3954.6	3.9
													BLM	24	0.3	4692.9	148.8	4451.9	5074.5	3.9
													PICH	25	0.3	1395.4	215	1022.8	1933.7	4.4
													TOP3A	26	0.3	3098.1	229.3	2872.8	3715.1	4.4
													BLM	27	0.3	4780.6	254.1	4420.1	5450.4	4.4
													PICH	28	0.3	1576.6	266.4	1190.4	2016.8	3.9
													TOP3A	29	0.3	3100.7	182.7	2875.1	3744	3.9
													BLM	30	0.3	4926.3	364.5	4411.2	5691.7	3.9
													PICH	31	0.4	1250.5	83.7	1023.7	1431.4	6
													TOP3A	32	0.4	3116.5	180.3	2855.8	3827.3	6
													BLM	33	0.4	4661.3	177.6	4254.7	5121.6	6
													PICH	34	0.3	1223.8	65.9	1092.4	1338.9	4.2
													TOP3A	35	0.3	3218.2	162.1	2973.7	3606.5	4.2
													BLM	36	0.3	4616.3	97	4428.9	4874.9	4.2
												U2OS_siTOP3A_gBLMC18-TOP3A-PICH-19.czi
												Background	PICH	1	0.6	833	25.8	782.4	936.1	9.2
												Background	TOP3A	2	0.6	2794.2	99.8	2491	3088.3	9.2
												Background	BLM	3	0.6	3465.4	157.2	3140.7	3912.2	9.2
													PICH	4	0.5	1123.1	92.2	961	1414.4	8.2
													TOP3A	5	0.5	2923	235.7	2621.4	3414	8.2
													BLM	6	0.5	3723.8	196.8	3459.7	4331.8	8.2
													PICH	7	0.4	1182.3	122.2	990.6	1459	6.2
													TOP3A	8	0.4	3264.1	259.3	2831.6	4145.3	6.2
													BLM	9	0.4	3743.6	182.5	3409.4	4101.1	6.2
													PICH	10	0.3	1157.4	112.1	938	1411	3.9
													TOP3A	11	0.3	3154.7	203.9	2864.8	3666.4	3.9
													BLM	12	0.3	3632.7	137.3	3403.9	3985.6	3.9
													PICH	13	0.4	1114.1	93.2	971.8	1406.5	6.6
													TOP3A	14	0.4	3308.5	320.8	2907.3	4173.8	6.6
													BLM	15	0.4	3653.2	146.9	3361.7	4122.8	6.6
													PICH	16	0.5	1192.4	121.5	1003.2	1534.9	7.5
													TOP3A	17	0.5	3620	178.8	3104.4	4217.1	7.5
													BLM	18	0.5	3901.4	212.9	3418.2	4450.5	7.5
													PICH	19	0.6	1245.8	76.9	1089.4	1463.7	8.5
													TOP3A	20	0.6	3768.1	295	3318	4668.7	8.5
													BLM	21	0.6	4118.5	208.8	3726.5	4639.5	8.5
													PICH	22	0.4	1174.1	100.6	957.1	1508.3	5.5
													TOP3A	23	0.4	4043.3	641.1	3294	6061	5.5
													BLM	24	0.4	3991.4	176.5	3674.8	4465.5	5.5
													PICH	25	0.2	1200.4	93.2	1030.2	1413.5	3.5
													TOP3A	26	0.2	3538.4	427.1	3086	4828	3.5
													BLM	27	0.2	4009.7	192.7	3702	4542.8	3.5
													PICH	28	0.2	1131.7	102.4	984.5	1325.5	3.5
													TOP3A	29	0.2	3622	231.8	3345.8	4322.2	3.5
													BLM	30	0.2	3946.9	174	3742	4426.2	3.5
												U2OS_siTOP3A_gBLMC18-TOP3A-PICH-25.czi
												Background	PICH	1	0.6	858.6	21.3	798.5	915.3	8.6
												Background	TOP3A	2	0.6	3271.2	264.7	2797.5	4096.4	8.6
												Background	BLM	3	0.6	3823.6	194.1	3482.7	4653.9	8.6
													PICH	4	0.3	1546.7	158.1	1146.7	1809.8	4.5
													TOP3A	5	0.3	3365	338.8	2950.6	4456.2	4.5
													BLM	6	0.3	4087.4	254.7	3595.6	4613.9	4.5
													PICH	7	0.3	1436.1	119.7	1154.3	1669.2	5
													TOP3A	8	0.3	3643.5	402.9	2904.9	4776.1	5
													BLM	9	0.3	4061.2	275	3695.3	4807.8	5
													PICH	10	0.3	1565.9	156.8	1345.2	1834	3.9
													TOP3A	11	0.3	3827.9	324.3	3367.6	4502.6	3.9
													BLM	12	0.3	4238	273.7	3820.8	4845.2	3.9
													PICH	13	0.5	1445.3	162.6	1109	1759.5	7.6
													TOP3A	14	0.5	4055.8	319.1	3337.3	4948.4	7.6
													BLM	15	0.5	4306.2	206.9	3792.1	4727.4	7.6
													PICH	16	0.3	1363.2	169	1056	1646	5.1
													TOP3A	17	0.3	4109.6	405.1	3295.9	5143.5	5.1
													BLM	18	0.3	4139	160.4	3732	4500.4	5.1
													PICH	19	0.2	1732.3	148.1	1450.8	2036.3	2.8
													TOP3A	20	0.2	4797.2	473.5	4227	6504.2	2.8
													BLM	21	0.2	4782.9	298.9	4153	5531.2	2.8
													PICH	22	0.3	1610.6	157.6	1279.4	1873	4.3
													TOP3A	23	0.3	4581.1	339.3	3954	5553	4.3
													BLM	24	0.3	4695.1	292.5	4258.7	5403.2	4.3
													PICH	25	0.2	1308.7	160.1	1055.4	1673.2	3.7
													TOP3A	26	0.2	3763	237.7	3221	4194.2	3.7
													BLM	27	0.2	4174.1	229.2	3738	4674.6	3.7

## Sheet:  Graphs_Absolute values
U2OS BLM					U2OS TOP3A					HeLa BLM					HeLa TOP3A
siCTRL		siTOP3A			siCTRL		siTOP3A			siCTRL		siTOP3A			siCTRL		siTOP3A
PICH	BLM	PICH	BLM		PICH	TOP3A	PICH	TOP3A		PICH	BLM	PICH	BLM		PICH	TOP3A	PICH	TOP3A
443.8	1110	97.3	0		443.8	1978.5	97.3	0		281.4	1721.8	188.9	0		281.4	1601.3	188.9	0
287	995.6	196.2	219		287	2192.5	196.2	0		272.7	1524.7	296.7	0		272.7	1891.7	296.7	0
457.9	1713.3	153.6	43.9		457.9	3131.5	153.6	0		173	827.1	293.5	0		173	863.6	293.5	0
388.8	1138.4	151	127		388.8	1448.3	151	0		304.2	1690.5	170.4	0		304.2	1035.9	170.4	0
284	1250.4				284	2486.4				319.4	1557.4	227.9	0		319.4	988.9	227.9	0
259.1	738.4	380.1	145.3		259.1	770.6	380.1	0		346.8	1714	378.3	198.1		346.8	374.3	378.3	0
		315.3	0				315.3	0		220.3	1875.5				220.3	1772.6
173	902.1	412.7	134.9		173	1787.1	412.7	0				202.8	207				202.8	0
		710.2	486				710.2	0		262.7	1428.1	269.8	347.3		262.7	1457.5	269.8	417.1
713.7	1041.2	500.3	274.1		713.7	526.8	500.3	0		381.7	1912.2	315.4	404.1		381.7	1576.2	315.4	190.6
657.8	1250.2	519.4	544.8		657.8	1033.1	519.4	0		494	2300	245.6	403		494	2779.5	245.6	280.5
515.9	1259.4	378.7	297.4		515.9	1707.1	378.7	0		164.2	858.2	248.9	333.2		164.2	1627.4	248.9	0
587.6	1327.8	320.4	234.2		587.6	1523.6	320.4	200.9		260.3	1568.8	335.1	628.4		260.3	1655	335.1	88.5
691	843.6	469.2	217.5		691	637	469.2	0		237.7	1434.4	307.2	580.4		237.7	1381.8	307.2	56.6
833.9	855.8	222.9	140.3		833.9	609.3	222.9	0		263	1329.2	207.5	279.2		263	1159	207.5	306.6
493.6	836.3				493.6	923.4
		296	175				296	272.8		309.8	1349.9	121.7	36.9		309.8	2177.7	121.7	0
627.6	907.7	167.1	0		627.6	1956.8	167.1	0		273.9	1303.6	325	619		273.9	2518.6	325	60
435.5	1447.1	395.8	224.7		435.5	1784.6	395.8	0		271.5	1029.1	304.7	411.8		271.5	2436.6	304.7	194.8
533.8	818	386.1	359.6		533.8	1072.6	386.1	0		279.1	1667.2	204.2	28.3		279.1	2830.7	204.2	0
503.6	966.9	400.3	424.3		503.6	1492.7	400.3	111.9		269.4	1527.7	283.8	95.3		269.4	3041.9	283.8	0
516.1	1389.9	586.9	695.2		516.1	3182	586.9	332.3		231.1	1814	174.2	0		231.1	3322.8	174.2	0
521.6	1275.4	592.2	749.5		521.6	3427.6	592.2	794.4		430.6	2091.3	305.5	439.6		430.6	3607.3	305.5	193.4
708.7	1467.2	625.5	1100.3		708.7	3043.8	625.5	547.2		330.3	1507.6				330.3	2751.5
910.9	1809	746.4	900.1		910.9	2609.3	746.4	615.3		242	739	198	205.1		242	2038.8	198	124.7
698.7	1918.5	691.1	818.4		698.7	2366.4	691.1	642.7		237.5	1464.5	320.6	453.3		237.5	2725	320.6	433.3
411.5	1064	583.3	819.4		411.5	1713.7	583.3	503.5		243.6	1154.7	299.7	86.8		243.6	2088.8	299.7	0
		642.1	669.7				642.1	604.3		261.1	885.1	424.9	170.2		261.1	2198.9	424.9	0
66.4	575.3	443.1	445		66.4	442.9	443.1	189		304.7	1837.4	370.7	116.5		304.7	3105.4	370.7	0
118.1	444.9	263.9	81.6		118.1	558.2	263.9	0				234	0				234	0
201	705.1				201	1074.1				355.3	1326.9	122.5	0		355.3	946.8	122.5	0
325.6	1049	368.2	0		325.6	1988.8	368.2	259.9		288.8	1534.9				288.8	1263.1
282.8	1047.6	389.5	0		282.8	1528.6	389.5	171.8		382.5	1918.7	145.5	0		382.5	974	145.5	0
362	1111.3	309.1	0		362	1414.7	309.1	0		317.6	1485.5	317.6	0		317.6	1014.1	317.6	0
263.2	758.7	409.2	0		263.2	1124.9	409.2	127.8		273.8	917.7	180	0		273.8	831.6	180	0
151.9	539.3	508.7	0		151.9	394.8	508.7	614.5		254.1	927.9				254.1	1070.6
157.9	1268.9	536.4	396.9		157.9	937.1	536.4	461		474.7	2223.8	226.3	205.1		474.7	329.9	226.3	0
		771.7	657.4				771.7	812		604.2	2539.4	134.8	124.4		604.2	1070.5	134.8	0
138.4	827.8	369.1	631.5		138.4	1795.6	369.1	534.4		565.6	2396.4	285.2	251.5		565.6	788.6	285.2	0
201.2	1221.8				201.2	2003.1				341.1	1137.8	272.6	271.1		341.1	1399.8	272.6	3.7
361.7	1290.7	289.8	404.4		361.7	1929	289.8	0		372.8	1003.8	228.7	0		372.8	723.8	228.7	0
261.4	1333.5	460.1	531.7		261.4	2189.1	460.1	0				341.3	135.6				341.3	0
160.8	1054.9	401.6	661.2		160.8	1805.1	401.6	0		116.7	912.1				116.7	1856
109.8	627	357.2	253		109.8	1010.5	357.2	0		254.6	1761.4	359.1	64.7		254.6	1803.8	359.1	0
141.2	677.4	446.6	530.7		141.2	660.6	446.6	33.2		217	1011.5	428.8	147.6		217	1211.1	428.8	0
64.9	331.4	520.3	513.3		64.9	518.4	520.3	0				404.8	167.3				404.8	52.1
		426.4	374.8				426.4	0		110.4	1229.2	289.7	31.4		110.4	1184.4	289.7	0
213.7	630.5	544.8	664.9		213.7	511.4	544.8	0		196.2	1091.8	356.2	336.3		196.2	10	356.2	0
70.5	196.6	599.9	834		70.5	0	599.9	0		247.8	1208.2	308.8	231.6		247.8	756.2	308.8	0
		638.4	868.5				638.4	0		237.5	1155.6	297.7	58.2		237.5	757	297.7	0
450.3	1398.3	485.1	393.4		450.3	2260.8	485.1	0		198.6	1180.9	353	157.3		198.6	1205.9	353	0
309.7	1373.1	201	0		309.7	1848.7	201	0		182.7	1041.9				182.7	1318.6
387.4	869				387.4	2405.6				243.3	1164.6	211.8	0		243.3	748.3	211.8	107
325.2	1083.1	154.1	186.9		325.2	1875.1	154.1	0		247	1317.1	417.7	0		247	857.2	417.7	229.8
		339.3	593.1				339.3	263.2				303.2	0				303.2	175.3
279.1	852.8	315.6	464.6		279.1	690.5	315.6	244		513.1	917.5	337.3	41.8		513.1	2008.8	337.3	0
		345	522.9				345	85.9		483.6	810.1	335.7	84.3		483.6	945.3	335.7	0
121.4	241.6	225.8	306.8		121.4	0	225.8	58.5		775.9	1874	241.8	0		775.9	1917.4	241.8	0
245	959.3	438.3	724.5		245	774.7	438.3	65		577.1	1526.7	420	15		577.1	1179.3	420	227.8
237.7	1319.4	311.7	298.1		237.7	1920	311.7	0		515	1410.6				515	2904.3
340.4	1789				340.4	1751.6				381.6	1116.7	159.6	121.7		381.6	1994.5	159.6	0
236.3	1065.9	240.8	0		236.3	1402.7	240.8	0		465.3	1257.2	210.9	14		465.3	2552.2	210.9	0
261.7	1497	283.8	0		261.7	1445.9	283.8	0		456.4	1434.1	296.4	176.6		456.4	2023.1	296.4	0
299.5	993.3	562.7	64.7		299.5	1324.7	562.7	0		521.9	1098.3	311.8	166.7		521.9	1390.2	311.8	0
263.2	839.2	455.5	104.3		263.2	1342.5	455.5	0		373.7	904.9	301.1	117.9		373.7	2179.9	301.1	120.9
221	710	542.8	216.2		221	1043.1	542.8	0		236.7	769.2	298	114.8		236.7	1688.2	298	0
		485.7	0				485.7	0
216.3	485.5	425.2	0		216.3	385.8	425.2	0		137.9	1069.1	511.3	0		137.9	1668.3	511.3	0
303.4	708.7	462.6	136.9		303.4	487.1	462.6	0		161.6	816.5	365.1	0		161.6	1521.4	365.1	11.3
466.9	986.9	604.8	449.5		466.9	925.1	604.8	0		138.8	666	550.3	111.9		138.8	402.6	550.3	240
416.9	1284.2	456.6	176.7		416.9	1216.8	456.6	0		162	1261	613	143.4		162	1982.2	613	0
646.3	1765.7	332.3	0		646.3	1605.8	332.3	0		28.6	425.9	303.9	200.1		28.6	2091.2	303.9	187.7
579.9	1713.1				579.9	1857.9
644.1	2033.8	473.3	412		644.1	2015.9	473.3	181.5		240.7	938.2	227.8	0		240.7	1268.1	227.8	0
455.5	1405.9	510.8	692.4		455.5	1724.8	510.8	79.5		300.2	1132.2	246.2	0		300.2	838.4	246.2	0
569.6	2017.2	518	630.7		569.6	2462.3	518	30.2		462.2	1863.7	441.6	550.6		462.2	756.8	441.6	0
657.5	1732.2	754.7	490.8		657.5	2315	754.7	63.3		669.7	2172.8	247.2	0		669.7	1494.6	247.2	0
569	1561.9	703.7	354.5		569	1954.3	703.7	0		558.8	1613.4	235.4	0		558.8	1448.1	235.4	0
627.9	1622.3	532.9	300.3		627.9	1653.6	532.9	0		338.8	1368.7	187.5	0		338.8	1922.2	187.5	0
555.7	1573.9	590.3	122.4		555.7	1927.5	590.3	0		413	1282				413	2138.9
585.1	1436.5	308.3	0		585.1	1281.3	308.3	0		423.5	1477.9	165.6	0		423.5	2521.7	165.6	0
431.4	1186.3				431.4	958.1				631.7	1918.1	135.4	0		631.7	1585.4	135.4	0
		248.9	345				248.9	413.9		266.4	1064.1	346.7	249.7		266.4	1227	346.7	0
359.8	860.8	447.8	642.9		359.8	624.2	447.8	390.5		184.5	544.7	343.4	285.2		184.5	366.2	343.4	0
369.5	964.7	340.7	439.6		369.5	901.9	340.7	354.9				285.2	0				285.2	0
273.9	849.4	484.8	741.3		273.9	1047.4	484.8	574.4		326.7	1635	313	0		326.7	1122.4	313	0
261.4	1143.9	295.2	433.7		261.4	1830.2	295.2	270.8		72.1	276.1	301.7	0		72.1	800.2	301.7	0
280.3	1148.7	531.1	701.7		280.3	2266.4	531.1	185.5		337.6	1610				337.6	1595.2
364.1	1032	426.4	416.3		364.1	2076.7	426.4	118		251.6	892.8				251.6	3011.4
294.8	696.1	382.3	334.7		294.8	1044.2	382.3	260.8		331	1321.7				331	1967.7
214.9	928.9	359.5	370.2		214.9	2035.2	359.5	2.2		430.4	1585.4				430.4	1608.7
		313.2	187.4				313.2	47.8		314.9	1427.5				314.9	2792.3
		290.3	141.1				290.3	0		274.7	951.3				274.7	2418.1
		254.6	141.4				254.6	0		157	839.5				157	1581.3
										428.5	1320.2				428.5	723.3
		256.7	2.8				256.7	0		409.7	1877.9				409.7	1459.2
		469.4	347.7				469.4	30.9		304.8	981.6				304.8	1534
		372.8	361.5				372.8	292.5
		418.2	446.8				418.2	314.8		303.8	1334.6				303.8	1471.8
		386.4	431.4				386.4	403.4		395.1	1767.6				395.1	1668.4
		529.2	611				529.2	474.5		383.3	1802.6				383.3	1921
		500.9	521.9				500.9	347.2		336.1	1428.8				336.1	1520.5
		510.1	609.6				510.1	166.3		300.1	1423.8				300.1	1169.5
		691.3	755.3				691.3	168.9		259.8	1130.5				259.8	1218.3
		365.2	490.3				365.2	184.7		243.6	986.4				243.6	967.4
		338.5	445.3				338.5	286.4		341.8	1154.4				341.8	1020.5
		290.1	258.4				290.1	128.8		124.9	657.6				124.9	1274.1
		349.3	278.2				349.3	469.9		218.4	1252.9				218.4	1477.2
		324.4	167.3				324.4	360.5		266.3	1913.1				266.3	2786.3
		281.1	187.8				281.1	514.3		402.6	2032				402.6	3577.2
		359.4	436				359.4	825.8		255.4	1819.4				255.4	2529.1
		412.8	653.1				412.8	973.9		283.1	1310.2				283.1	2176.6
		341.1	526				341.1	1249.1		359.5	1889				359.5	2520.3
		367.4	544.3				367.4	744.2		236.6	1933.2				236.6	1775.4
		298.7	481.5				298.7	827.8		189.5	1663.1				189.5	1883.8
										173.6	645.1				173.6	880
		688.1	263.8				688.1	93.8		221.3	1194.1				221.3	2016.7
		577.5	237.6				577.5	372.3
		707.3	414.4				707.3	556.7
		586.7	482.6				586.7	784.6
		504.6	315.4				504.6	838.4
		873.7	959.3				873.7	1526
		752	871.5				752	1309.9
		450.1	350.5				450.1	491.8

## Sheet: HeLa siTOP3A RawData
	HeLa siCTRL_+ICRF-193_gBLM-rTOP3A-mPICH											HeLa siTOP3A_+ICRF-193_gBLM-rTOP3A-mPICH
	HeLa_siCTRL_gBLMC18-TOP3A-PICH-01.czi			Area	Mean	StdDev	Min	Max	Length			HeLa_siTOP3A_gBLMC18-TOP3A-PICH-01.czi			Area	Mean	StdDev	Min	Max	Length
	Background	PICH	1	0.9	855.8	26.2	794.9	941.1	14.5			Background	PICH	1	0.6	745.3	22.4	702.3	884.4	8.7
	Background	TOP3A	2	0.9	4717	608.8	3440.7	6048.4	14.5			Background	TOP3A	2	0.6	4239.6	224.6	3924.6	4827.2	8.7
	Background	BLM	3	0.9	5217.3	235	4592.2	5726.1	14.5			Background	BLM	3	0.6	4390.9	263	3954	5136.3	8.7
		PICH	4	0.3	1137.2	96.4	905	1380.4	5				PICH	4	0.2	934.2	70.7	833.8	1095.3	2.6
		TOP3A	5	0.3	6318.3	989.3	4304.1	7900.8	5				TOP3A	5	0.2	3431.8	103.1	3259.9	3698.1	2.6
		BLM	6	0.3	6939.1	758.8	5336.8	8149.9	5				BLM	6	0.2	4156.9	119.5	3984.9	4477.2	2.6
		PICH	7	0.3	1128.5	84.6	986.3	1358.8	4.9				PICH	7	0.2	1042	145.2	814.6	1287.4	3.6
		TOP3A	8	0.3	6608.7	708.5	5180	7942.5	4.9				TOP3A	8	0.2	3364.4	336.6	2821.5	3847.6	3.6
		BLM	9	0.3	6742	558.6	5866.2	7739.5	4.9				BLM	9	0.2	4322.6	454.1	3587.9	5317.8	3.6
		PICH	10	0.3	1028.8	43.9	922.5	1128	4.7				PICH	10	0.2	1038.8	101.4	817.9	1222.9	3.8
		TOP3A	11	0.3	5580.6	795.4	4238	8028	4.7				TOP3A	11	0.2	3708.4	245.9	3126.4	4214.7	3.8
		BLM	12	0.3	6044.4	527.4	4953.4	7167.7	4.7				BLM	12	0.2	4348.2	346	3685	5189.1	3.8
		PICH	13	0.2	1160	60.6	981.1	1254.3	3.5				PICH	13	0.2	915.7	34.3	856.6	984.4	3
		TOP3A	14	0.2	5752.9	435.8	4564.6	6496.4	3.5				TOP3A	14	0.2	3773.8	266.1	3388.4	4254.6	3
		BLM	15	0.2	6907.8	316.9	5727.7	7410.6	3.5				BLM	15	0.2	4283.5	256	3957.7	4756	3
		PICH	16	0.2	1175.2	98.3	1010.4	1403.6	3.4				PICH	16	0.1	973.2	90	838.9	1176.2	2
		TOP3A	17	0.2	5705.9	603.1	4614.8	6828.5	3.4				TOP3A	17	0.1	3651.5	118.6	3462.7	3837.7	2
		BLM	18	0.2	6774.7	488.4	5724.9	7790.6	3.4				BLM	18	0.1	4350.5	189.1	3926.1	4710.1	2
		PICH	19	0.5	1202.6	112.6	1014.6	1499.5	7.3				PICH	19	0.1	1123.6	82.9	932.3	1291.6	2.2
		TOP3A	20	0.5	5091.3	510	3929.4	6043.3	7.3				TOP3A	20	0.1	3625.6	137.1	3271	3843.5	2.2
		BLM	21	0.5	6931.3	622.5	5829.5	9146.2	7.3				BLM	21	0.1	4589	294.9	4122	5258.9	2.2
		PICH	22	0.3	1076.1	59.9	960	1259	4.3
		TOP3A	23	0.3	6489.6	869.2	4668.6	8228.6	4.3			HeLa_siTOP3A_gBLMC18-TOP3A-PICH-02.czi
		BLM	24	0.3	7092.8	686.3	5605.3	8405.9	4.3			Background	PICH	1	0.1	658.6	39.1	584	729	2.1
												Background	TOP3A	2	0.1	2771	178.1	2425	3181	2.1
	HeLa_siCTRL_gBLMC18-TOP3A-PICH-05.czi											Background	BLM	3	0.1	3299.1	186.9	2961	3837	2.1
	Background	PICH	1	1	894	34.5	838.4	1018.3	15.2				PICH	4	0.1	861.4	61.6	781.9	1026.7	2.2
	Background	TOP3A	2	1	4153.8	542.6	3476	5983.3	15.2				TOP3A	5	0.1	2742.8	200.5	2441.2	3109.6	2.2
	Background	BLM	3	1	4590.1	181.5	4203.9	5005.3	15.2				BLM	6	0.1	3506.1	326.5	3047.2	4303.5	2.2
		PICH	4	0.3	1156.7	93.3	1003.9	1381.5	4.5				PICH	7	0.4	928.4	119.2	676.5	1165.6	5.9
		TOP3A	5	0.3	5611.3	452.6	4911	6812.1	4.5				TOP3A	8	0.4	3188.1	583.9	2217	4913.6	5.9
		BLM	6	0.3	6018.2	512.1	5087.4	7337.7	4.5				BLM	9	0.4	3646.4	431.1	2990.8	4344.9	5.9
		PICH	7	0.2	1275.7	161.4	1083.5	1623.8	3.7				PICH	10	0.2	974	103.9	846.4	1201.9	3.6
		TOP3A	8	0.2	5730	409.9	4950	6555.7	3.7				TOP3A	11	0.2	2961.6	348	2415	3627.2	3.6
		BLM	9	0.2	6502.3	551.7	5859.3	8022.3	3.7				BLM	12	0.2	3703.2	215.9	3195	4028.1	3.6
		PICH	10	0.2	1388	134.7	1039.1	1665.9	2.9				PICH	13	0.3	904.2	73.9	763.8	1074.8	4.9
		TOP3A	11	0.2	6933.3	1502.2	4837.5	10455.3	2.9				TOP3A	14	0.3	3051.5	380.2	2387	3884.2	4.9
		BLM	12	0.2	6890.1	1148.7	5370.7	9096.8	2.9				BLM	15	0.3	3702.1	315.7	3069.7	4437.9	4.9
		PICH	13	0.4	1058.2	83.9	885.4	1293.9	6.3				PICH	16	0.2	907.5	75.8	798	1074.2	2.6
		TOP3A	14	0.4	5781.2	943.3	3919.4	7093.6	6.3				TOP3A	17	0.2	2747.2	146.8	2443.5	3044.6	2.6
		BLM	15	0.4	5448.3	642.2	4230.2	6432.4	6.3				BLM	18	0.2	3632.3	269.2	3162.5	4044.7	2.6
		PICH	16	0.4	1154.3	89.4	1008.9	1390.5	5.5				PICH	19	0.3	993.7	107.6	794	1272.5	4.3
		TOP3A	17	0.4	5808.8	675.8	4593	7253.4	5.5				TOP3A	20	0.3	2859.5	339.7	2270.9	3484	4.3
		BLM	18	0.4	6158.9	607.3	4916	7447.2	5.5				BLM	21	0.3	3927.5	221.2	3407	4534.5	4.3
		PICH	19	0.2	1131.7	126.7	959.2	1365	2.4				PICH	22	0.4	965.8	111.9	694	1227.4	6.3
		TOP3A	20	0.2	5535.6	384.6	4767.4	6163.9	2.4				TOP3A	23	0.4	2827.6	328.2	2272	3569.6	6.3
		BLM	21	0.2	6024.5	531.9	5029.3	6950.3	2.4				BLM	24	0.4	3879.5	235.9	3353	4526	6.3
		PICH	22	0.1	1157	137.2	980.7	1419.6	1.6				PICH	25	0.4	866.1	52.1	759.5	1012.3	5.9
		TOP3A	23	0.1	5312.8	514.3	4761.5	6491.2	1.6				TOP3A	26	0.4	3077.6	189.3	2689.8	3479.3	5.9
		BLM	24	0.1	5919.3	268.5	5262	6299.9	1.6				BLM	27	0.4	3578.3	144.7	3128.3	3962.9	5.9
	HeLa_siCTRL_gBLMC18-TOP3A-PICH-07.czi											HeLa_siTOP3A_gBLMC18-TOP3A-PICH-04.czi
	Background	PICH	1	1.7	851.3	36	751.4	968.6	26.6			Background	PICH	1	0.4	831.8	23.3	776.2	887.4	5.6
	Background	TOP3A	2	1.7	4084	504.7	3291.1	5401.8	26.6			Background	TOP3A	2	0.4	4624	496.5	3809.1	5422.3	5.6
	Background	BLM	3	1.7	4092.4	182.3	3623	4669.5	26.6			Background	BLM	3	0.4	4278.8	171.3	3958.8	4805.6	5.6
		PICH	4	0.5	1161.1	94.7	939.3	1422.8	7.5				PICH	4	0.3	953.5	46.8	850.7	1035.5	4.1
		TOP3A	5	0.5	6261.7	737.7	4885	8306.2	7.5				TOP3A	5	0.3	4595.2	496.7	3747.6	5699.3	4.1
		BLM	6	0.5	5442.3	342.1	4562.4	6207.3	7.5				BLM	6	0.3	4315.7	322.2	3765.7	5030.8	4.1
		PICH	7	0.4	1125.2	85.3	943.1	1345.2	6				PICH	7	0.3	1156.8	99.4	919.5	1408.9	4.8
		TOP3A	8	0.4	6602.6	619.8	4759	7743.7	6				TOP3A	8	0.3	4684	418.5	3731.2	5337.7	4.8
		BLM	9	0.4	5396	345.9	4687.5	6335.1	6				BLM	9	0.3	4897.8	426.2	4028.2	5781.6	4.8
		PICH	10	0.3	1122.8	45.9	1046.1	1234.9	4.5				PICH	10	0.2	1136.5	79.5	960.3	1345.5	3.8
		TOP3A	11	0.3	6520.6	517.6	5133.1	7820.6	4.5				TOP3A	11	0.2	4818.8	454.7	4139.9	5951	3.8
		BLM	12	0.3	5121.5	195.9	4592.8	5443.2	4.5				BLM	12	0.2	4690.6	282.9	4165.6	5365.3	3.8
		PICH	13	0.3	1130.4	72.3	1009.6	1335.9	4.5				PICH	13	0.3	1036	44.4	953.1	1130.6	4.1
		TOP3A	14	0.3	6914.7	483	6111	8164.7	4.5				TOP3A	14	0.3	4035.4	212.7	3611.8	4439.3	4.1
		BLM	15	0.3	5759.6	332.9	5177.7	6406.2	4.5				BLM	15	0.3	4307.1	201.4	3821	4730.3	4.1
		PICH	16	0.2	1120.7	62.2	977.6	1254.1	3.3				PICH	16	0.1	1115.6	72.1	1008.9	1223.3	1.6
		TOP3A	17	0.2	7125.9	343.9	6507.2	7884.6	3.3				TOP3A	17	0.1	4109.6	228	3820.7	4525	1.6
		BLM	18	0.2	5620.1	232.3	5085	6089.4	3.3				BLM	18	0.1	4374.1	110.6	4162	4540.5	1.6
		PICH	19	0.3	1082.4	78.6	972.9	1241.6	4				PICH	19	0.1	1006	100.7	881.8	1199.1	2.1
		TOP3A	20	0.3	7406.8	696.1	6232.5	9007.9	4				TOP3A	20	0.1	4473.9	490.1	3563	5270.5	2.1
		BLM	21	0.3	5906.4	418.9	5020	6979.6	4				BLM	21	0.1	4203.3	198.6	3814	4545.2	2.1
		PICH	22	0.2	1281.9	81.9	1080.5	1451.1	3.3				PICH	22	0.3	1137.3	78.6	976.5	1342.5	3.9
		TOP3A	23	0.2	7691.3	853.1	5996	9383.7	3.3				TOP3A	23	0.3	4817.4	423.7	4133.7	5797.9	3.9
		BLM	24	0.2	6183.7	609.4	5220	7215.7	3.3				BLM	24	0.3	4718.4	304.3	4157.3	5402.8	3.9
		PICH	25	0.3	1181.6	84.7	1039	1318.3	4
		TOP3A	26	0.3	6835.5	570	5856.8	7784.5	4			HeLa_siTOP3A_gBLMC18-TOP3A-PICH-05.czi
		BLM	27	0.3	5600	503.6	4678	7107.1	4			Background	PICH	1	0.9	781.7	33.2	699.1	876.5	14.3
		PICH	28	0.1	1093.3	46.6	1031.2	1186.4	1.2			Background	TOP3A	2	0.9	4095.4	291.7	3298	4901.5	14.3
		TOP3A	29	0.1	6122.8	292.9	5549.4	6487.6	1.2			Background	BLM	3	0.9	3800.8	185.6	3402.2	4420.3	14.3
		BLM	30	0.1	4831.4	151.8	4582	5198.4	1.2				PICH	4	0.3	979.7	58.2	854.9	1155	4.1
		PICH	31	0.4	1088.8	91.7	960.2	1368.7	5.9				TOP3A	5	0.3	4220.1	619.1	3334.7	5663.9	4.1
		TOP3A	32	0.4	6809	628.8	5314	8550.3	5.9				BLM	6	0.3	4005.9	298.6	3317.2	4580.3	4.1
		BLM	33	0.4	5556.9	297.2	5120.8	6333.2	5.9				PICH	7	0.1	1102.3	80.9	960.3	1242.4	2.1
		PICH	34	0.5	1094.9	62.6	949.6	1324.6	7.7				TOP3A	8	0.1	4528.7	331	3673.4	4975.3	2.1
		TOP3A	35	0.5	6172.8	773	4877.2	8072.1	7.7				BLM	9	0.1	4254.1	141.7	3984.7	4507.1	2.1
		BLM	36	0.5	5247.1	335.5	4568.2	5963.5	7.7				PICH	10	0.2	1081.4	76.3	884.1	1231.5	3.3
		PICH	37	0.1	1112.4	51.9	992.9	1192.2	1.7				TOP3A	11	0.2	3978.5	406.2	3050.9	4472.7	3.3
		TOP3A	38	0.1	6282.9	322.5	5693.4	6810.8	1.7				BLM	12	0.2	3887.6	174	3510.8	4229.7	3.3
		BLM	39	0.1	4977.5	259.8	4592.3	5457	1.7				PICH	13	0.2	1206.6	97.8	972.3	1370.3	3.7
		PICH	40	0.2	1156	86.2	1045.3	1328.1	2.9				TOP3A	14	0.2	3852.3	395.9	3023.6	4531.6	3.7
		TOP3A	41	0.2	7189.4	369.8	6399.2	7930	2.9				BLM	15	0.2	3971	299.5	3349.5	4621.6	3.7
		BLM	42	0.2	5929.8	278.3	5459.7	6592.9	2.9				PICH	16	0.2	1152.4	102.3	928.5	1353.7	3.4
													TOP3A	17	0.2	3842.5	338.6	3154.5	4388.7	3.4
	HeLa_siCTRL_gBLMC18-TOP3A-PICH-08.czi												BLM	18	0.2	3917.3	284.5	3283.6	4395.9	3.4
	Background	PICH	1	0.1	778.3	31.2	727.6	867	2.2				PICH	19	0.2	1015.7	37.1	929.7	1102	2.8
	Background	TOP3A	2	0.1	4764.4	189.5	4312	5080.6	2.2				TOP3A	20	0.2	3873.1	377.2	2940.3	4592.8	2.8
	Background	BLM	3	0.1	4077	158.2	3824.4	4432.8	2.2				BLM	21	0.2	3745.7	250.6	3261	4223.9	2.8
		PICH	4	0.2	1133.6	52.5	1029.4	1271.4	3.3				PICH	22	0.1	904.2	55.6	841.7	1044.9	1.9
		TOP3A	5	0.2	5711.2	253.8	5273.9	6224.4	3.3				TOP3A	23	0.1	3737.6	177.4	3441.9	4006.8	1.9
		BLM	6	0.2	5403.9	273.2	4954.2	5964.2	3.3				BLM	24	0.1	3638	129.2	3451	3870.3	1.9
		PICH	7	0.1	1067.1	78.4	932.2	1244.5	2
		TOP3A	8	0.1	6027.5	615.7	4800.5	6994.3	2			HeLa_siTOP3A_gBLMC18-TOP3A-PICH-06.czi
		BLM	9	0.1	5611.9	330.5	5048.4	6217	2			Background	PICH	1	0.3	761.1	20.2	714.9	802.8	5
		PICH	10	0.1	1160.8	94.5	986.2	1264.6	1.1			Background	TOP3A	2	0.3	3831.8	212.6	3435.9	4244.3	5
		TOP3A	11	0.1	5738.4	560.7	5023.4	6840.7	1.1			Background	BLM	3	0.3	3552.6	152.3	3268.2	3920	5
		BLM	12	0.1	5995.7	417.4	5360	6788.3	1.1				PICH	4	0.2	906.6	84.4	773.8	1077.5	3.6
		PICH	13	0.1	1095.9	47.7	1039	1225.3	2				TOP3A	5	0.2	3163.9	463.1	2381	3878	3.6
		TOP3A	14	0.1	5778.5	494.7	4553.6	6478.7	2				BLM	6	0.2	3124.7	166.8	2804	3661.8	3.6
		BLM	15	0.1	5562.5	334.1	5026.5	6275.5	2				PICH	7	0.3	1078.7	124.9	804.8	1391	5.1
		PICH	16	0.3	1052.1	62.8	944.2	1227.7	5.1				TOP3A	8	0.3	3390.2	506.2	2271.2	4263.9	5.1
		TOP3A	17	0.3	5596	577.2	4505.7	6696	5.1				BLM	9	0.3	3523.4	336.8	2914.9	4425	5.1
		BLM	18	0.3	4994.7	584.5	3957.6	6352.1	5.1				PICH	10	0.2	941.1	68.2	838.7	1090.9	3.8
		PICH	19	0.3	1032.4	42.4	935.7	1190.5	4.1				TOP3A	11	0.2	3263.2	547.7	2490.4	4587.2	3.8
		TOP3A	20	0.3	5835	514.8	4685.3	6756.5	4.1				BLM	12	0.2	3214.9	234.4	2844.4	3952.1	3.8
		BLM	21	0.3	5004.9	508.2	4052.7	6137.2	4.1
		PICH	22	0.1	1253	134.2	1050	1451	1.9			HeLa_siTOP3A_gBLMC18-TOP3A-PICH-08.czi
		TOP3A	23	0.1	5094.3	546.5	4251.6	6047.2	1.9			Background	PICH	1	0.1	791.2	44.1	720	900.6	2.2
		BLM	24	0.1	6300.8	320	5747.5	6809.6	1.9			Background	TOP3A	2	0.1	3794.5	237.8	3481	4248.5	2.2
		PICH	25	0.2	1382.5	90.6	1225	1607	2.8			Background	BLM	3	0.1	3749.5	144.6	3426	4030.6	2.2
		TOP3A	26	0.2	5834.9	415.6	5269.9	6908.4	2.8				PICH	4	0.2	1017.5	67.5	886.5	1167.4	2.3
		BLM	27	0.2	6616.4	340	6187	7530.5	2.8				TOP3A	5	0.2	3412.7	116.6	3139	3648.9	2.3
		PICH	28	0.1	1343.9	64.3	1188.5	1460.3	1.6				BLM	6	0.2	3954.6	135.2	3729.7	4130.8	2.3
		TOP3A	29	0.1	5553	176.2	5276.4	5866.3	1.6				PICH	7	0.2	926	71	791.2	1044.7	3.7
		BLM	30	0.1	6473.4	136.1	6207.7	6695.5	1.6				TOP3A	8	0.2	3335.9	268	2852.6	3754.7	3.7
		PICH	31	0.2	1119.4	77.4	987.8	1258	3.2				BLM	9	0.2	3873.9	186.3	3519.5	4281.3	3.7
		TOP3A	32	0.2	6164.2	596.1	4952.5	7145.3	3.2				PICH	10	0.2	1076.4	107.9	903	1317.2	3.5
		BLM	33	0.2	5214.8	372	4626.7	5963.2	3.2				TOP3A	11	0.2	3432.4	403.2	2856.9	4266.9	3.5
		PICH	34	0.2	1151.1	109.6	954.5	1385.8	2.5				BLM	12	0.2	4001	351.4	3481.3	4816.9	3.5
		TOP3A	35	0.2	5488.2	413	4918	6429.5	2.5				PICH	13	0.1	1063.8	67.7	923.2	1216.4	2.2
		BLM	36	0.2	5080.8	241.4	4529	5474.2	2.5				TOP3A	14	0.1	3798.2	265	3286.5	4371.2	2.2
													BLM	15	0.1	4020.6	160.8	3699.1	4365	2.2
	HeLa_siCTRL_gBLMC18-TOP3A-PICH-09.czi												PICH	16	0.1	1019.9	64.4	931.6	1136.3	2
	Background	PICH	1	1.1	832.4	27.5	773.7	913.1	17.3				TOP3A	17	0.1	3251.8	234.2	2878	3769.5	2
	Background	TOP3A	2	1.1	4604.6	508	3584.2	5675.9	17.3				BLM	18	0.1	3688.9	78.1	3551.9	3832.8	2
	Background	BLM	3	1.1	3915.1	192	3484.3	4353.4	17.3				PICH	19	0.2	1132.5	92.3	952.2	1332.3	3.1
		PICH	4	0.6	949.1	82.4	812.3	1338.9	8.8				TOP3A	20	0.2	3271.9	196.5	2735	3659.7	3.1
		TOP3A	5	0.6	6060.6	794.4	5665	12335	8.8				BLM	21	0.2	3885.1	338.6	3232.5	4517.8	3.1
		BLM	6	0.6	4827.2	531.1	4287.8	9252	8.8
		PICH	7	0.3	1087	125.5	892.2	1414.5	4.2			HeLa_siTOP3A_gBLMC18-TOP3A-PICH-10.czi
		TOP3A	8	0.3	6408.4	539	4927.3	7551.9	4.2			Background	PICH	1	0.2	737.4	25.4	693.5	795.9	2.4
		BLM	9	0.3	5676.5	596.4	4439.1	6859.4	4.2			Background	TOP3A	2	0.2	3557.8	176.4	3158.8	4222.3	2.4
		PICH	10	0.3	1049.4	91.5	897.2	1261.2	4.1			Background	BLM	3	0.2	4027.1	127.4	3802	4238.7	2.4
		TOP3A	11	0.3	5815.7	794	4338.5	7456.8	4.1				PICH	4	0.3	1096.5	86.4	836	1291.7	4
		BLM	12	0.3	4926.6	423.1	4046	5806	4.1				TOP3A	5	0.3	3361.9	132.1	3069.5	3703.7	4
													BLM	6	0.3	4091.8	114.9	3901.6	4407.1	4
	HeLa_siCTRL_gBLMC18-TOP3A-PICH-10.czi												PICH	7	0.2	1166.2	62.7	989	1320.5	2.5
	Background	PICH	1	1	853.2	19.6	801.7	915.2	15				TOP3A	8	0.2	3344	204.3	3065.5	3750.4	2.5
	Background	TOP3A	2	1	4973.4	584.9	4064.3	6640	15				BLM	9	0.2	4174.7	224.6	3837.8	4657.6	2.5
	Background	BLM	3	1	4452.8	166.3	4089.1	4847.5	15				PICH	10	0.1	1142.2	83.5	1007.8	1328.6	2.2
		PICH	4	0.3	963.6	51.7	849.8	1075.9	5.1				TOP3A	11	0.1	3609.9	449.8	3090.8	4666.3	2.2
		TOP3A	5	0.3	6157.8	976.8	3978.3	7558.9	5.1				BLM	12	0.1	4194.4	245.8	3701.8	4639.7	2.2
		BLM	6	0.3	5682	621.8	4550.9	6840.9	5.1				PICH	13	0.1	1027.1	56.5	906.1	1117.4	2.1
		PICH	7	0.4	1049.4	55.5	937	1214.4	5.9				TOP3A	14	0.1	3136.6	275.7	2750.8	3633.5	2.1
		TOP3A	8	0.4	4983.4	522.4	3841.6	5894.1	5.9				BLM	15	0.1	4058.5	158.2	3668.5	4323.9	2.1
		BLM	9	0.4	5544.6	343.6	4696.4	6288.6	5.9				PICH	16	0.2	1093.6	110.8	826.8	1283.3	2.5
		PICH	10	0.2	1101	32.2	1037.1	1170.2	3.3				TOP3A	17	0.2	3510.8	370.7	2843	4229	2.5
		TOP3A	11	0.2	5729.6	491.1	5080	6843.6	3.3				BLM	18	0.2	4363.4	458.9	3804.3	5491.4	2.5
		BLM	12	0.2	5661	259.7	5008.9	6099.3	3.3				PICH	19	0.1	1046.2	74.8	877	1163.8	1.8
		PICH	13	0.2	1090.7	78.9	948	1291	3.2				TOP3A	20	0.1	3274.4	201.6	2868	3642.8	1.8
		TOP3A	14	0.2	5730.4	414.9	4823	6452	3.2				BLM	21	0.1	4258.7	216	3801	4569	1.8
		BLM	15	0.2	5608.4	234.1	5156	6229	3.2				PICH	22	0.2	1035.1	88.4	891.5	1183.7	2.3
		PICH	16	0.4	1051.8	67	881.9	1233.3	5.3				TOP3A	23	0.2	3364	164	2924	3634.8	2.3
		TOP3A	17	0.4	6179.3	549.9	4469.9	7162.6	5.3				BLM	24	0.2	4085.3	198.9	3640.1	4437.3	2.3
		BLM	18	0.4	5633.7	488	4420.8	6317.5	5.3				PICH	25	0.1	1090.4	66.9	933	1193.2	1.8
		PICH	19	0.3	1035.9	57.2	950.6	1156.2	4.5				TOP3A	26	0.1	3240.7	166	2909.8	3499.9	1.8
		TOP3A	20	0.3	6292	772.7	4949.8	8278.4	4.5				BLM	27	0.1	4184.4	247.9	3766.2	4689.1	1.8
		BLM	21	0.3	5494.7	311.3	4809.6	6045.4	4.5
		PICH	22	0.2	1096.5	65.2	1001.6	1263.6	3.2			HeLa_siTOP3A_gBLMC18-TOP3A-PICH-11.czi
		TOP3A	23	0.2	5721.7	368	4990.3	6409.8	3.2			Background	PICH	1	0.8	775.8	22.1	729	848.1	13.1
		BLM	24	0.2	5617.4	211.8	5217.1	6182.3	3.2			Background	TOP3A	2	0.8	2926.4	411.1	2257	4400.6	13.1
		PICH	25	0.2	1100.2	41.7	1022.7	1210.2	3.3			Background	BLM	3	0.8	3711.2	187.9	3419.1	4296.4	13.1
		TOP3A	26	0.2	5830.6	374.2	4838	6589.2	3.3				PICH	4	0.2	987.6	72.3	887.1	1141.5	2.9
		BLM	27	0.2	5769.9	110.5	5607	6114.5	3.3				TOP3A	5	0.2	3033.4	205	2724	3785.2	2.9
													BLM	6	0.2	3634.4	123	3365.2	3890.3	2.9
	HeLa_siCTRL_gBLMC18-TOP3A-PICH-11.czi												PICH	7	0.2	1193.5	138.4	972.6	1468.3	2.5
	Background	PICH	1	0.1	853.4	27.1	795.6	902.9	1.9				TOP3A	8	0.2	3156.2	209.4	2705.4	3566.4	2.5
	Background	TOP3A	2	0.1	3274.6	192.4	3058.6	3743	1.9				BLM	9	0.2	3703.6	157.6	3414.1	4059.2	2.5
	Background	BLM	3	0.1	3678.3	73.5	3508.1	3818.4	1.9				PICH	10	0.3	1079	46.4	971.5	1170.5	4.2
		PICH	4	0.2	1366.5	121.6	1153.9	1690	3.7				TOP3A	11	0.3	3101.7	203.9	2691	3581.4	4.2
		TOP3A	5	0.2	5283.4	413.5	4457.3	6312.6	3.7				BLM	12	0.3	3679.3	116.3	3465.1	3960	4.2
		BLM	6	0.2	4595.8	175.5	4222	5051.9	3.7				PICH	13	0.4	1113.1	87.6	973	1351.9	5.5
		PICH	7	0.2	1337	104.8	1107	1565.6	2.4				TOP3A	14	0.4	2840.8	390.2	2168.9	3658.1	5.5
		TOP3A	8	0.2	4219.9	393.9	3374.5	5143.4	2.4				BLM	15	0.4	3753	159.8	3452.9	4138.1	5.5
		BLM	9	0.2	4488.4	256.3	3840	4841.9	2.4				PICH	16	0.3	1111.5	91.2	937.9	1306.2	5.2
		PICH	10	0.1	1629.3	154.7	1365.9	1853.9	1.5				TOP3A	17	0.3	2746.6	279.6	2120.4	3278.9	5.2
		TOP3A	11	0.1	5192	189.7	4837	5636.9	1.5				BLM	18	0.3	3795.5	226	3388	4330	5.2
		BLM	12	0.1	5552.3	380	5005.2	6129.4	1.5				PICH	19	0.4	1017.6	101.3	877	1236.3	5.6
		PICH	13	0.2	1430.5	115.6	1267.6	1744.4	3.5				TOP3A	20	0.4	2732.3	356.3	2030.9	3346.7	5.6
		TOP3A	14	0.2	4453.9	256.4	4039.1	4913.5	3.5				BLM	21	0.4	3447.7	233.4	2979.1	3912.4	5.6
		BLM	15	0.2	5205	300.4	4733.5	5981.1	3.5				PICH	22	0.1	1195.8	141.3	994.7	1565.1	2.2
		PICH	16	0.3	1368.4	121.1	1127	1661.4	4				TOP3A	23	0.1	3154.2	169.3	2753.1	3515.6	2.2
		TOP3A	17	0.3	6178.9	557.9	5169	7466	4				BLM	24	0.1	3726.2	177.3	3407.5	4158.9	2.2
		BLM	18	0.3	5088.9	240.8	4563.8	5693.8	4
		PICH	19	0.3	1235	71.5	1124.1	1382.4	4.7			HeLa_siTOP3A_gBLMC18-TOP3A-PICH-12.czi
		TOP3A	20	0.3	5269.1	413.6	4662.1	6396.6	4.7			Background	PICH	1	0.2	676.6	34.1	653.1	843.8	3.3
		BLM	21	0.3	4795	221.1	4390.5	5312.7	4.7			Background	TOP3A	2	0.2	3406.4	267.7	2643	3803.9	3.3
		PICH	22	0.2	1318.7	90.2	1137.7	1520	2.7			Background	BLM	3	0.2	3064.5	131.1	2824.8	3411.1	3.3
		TOP3A	23	0.2	5826.8	399.1	5318	6766.4	2.7				PICH	4	0.3	836.2	78.3	696	1021.6	4.3
		BLM	24	0.2	4935.5	226.2	4377	5385.1	2.7				TOP3A	5	0.3	3132.3	300.2	2520	3763.8	4.3
		PICH	25	0.2	1309.8	133.2	1063.5	1530.9	2.7				BLM	6	0.3	3186.2	224	2848.6	3883.7	4.3
		TOP3A	26	0.2	5297.7	351.8	4733.6	6297.3	2.7				PICH	7	0.4	887.5	58.8	744.5	1032	6.1
		BLM	27	0.2	5112.4	319.4	4630.3	5807.5	2.7				TOP3A	8	0.4	3276.2	477.2	2386.9	4259.7	6.1
		PICH	28	0.2	1375.3	143.2	1095.7	1615.2	2.4				BLM	9	0.4	3078.5	139.9	2807.8	3370.8	6.1
		TOP3A	29	0.2	4664.8	151.9	4394.3	4938.7	2.4				PICH	10	0.4	973	71.6	830.7	1164.7	5.5
		BLM	30	0.2	4776.6	218.2	4306.1	5234.9	2.4				TOP3A	11	0.4	3000.2	353.1	2106	3686.6	5.5
		PICH	31	0.3	1227.1	110.8	1006.5	1492.1	4.3				BLM	12	0.4	3241.1	102.6	3052.5	3513.6	5.5
		TOP3A	32	0.3	5454.5	638.4	4687.3	7675.7	4.3				PICH	13	0.4	988.4	72.8	798.3	1110.3	6.7
		BLM	33	0.3	4583.2	253.8	4098.1	5145.6	4.3				TOP3A	14	0.4	3381.4	432.7	2259.3	4311.6	6.7
		PICH	34	0.1	1090.1	63.2	945.1	1232.3	2.1				BLM	15	0.4	3231.2	305.4	2706	4093.4	6.7
		TOP3A	35	0.1	4962.8	287.7	4509	5572.3	2.1				PICH	16	0.4	977.7	71.2	830.2	1153.6	5.3
		BLM	36	0.1	4447.5	311.5	4010.6	5340	2.1				TOP3A	17	0.4	3527.3	360.5	2709	4456.4	5.3
													BLM	18	0.4	3182.4	158.2	2809.1	3570.5	5.3
	HeLa_siCTRL_gBLMC18-TOP3A-PICH-12.czi												PICH	19	0.4	974.6	93.8	742.6	1145.3	5.3
	Background	PICH	1	0.1	818.6	46.8	728	941	1.9				TOP3A	20	0.4	3294.9	233.7	2687	3898.5	5.3
	Background	TOP3A	2	0.1	4283.7	133.9	3971	4530	1.9				BLM	21	0.4	3179.3	152.9	2807	3644.5	5.3
	Background	BLM	3	0.1	3560.5	117.4	3308	3755	1.9
		PICH	4	0.4	956.5	90.7	842.2	1240.2	6.4			HeLa_siTOP3A_gBLMC18-TOP3A-PICH-13.czi
		TOP3A	5	0.4	5952	469.9	4745	6910.4	6.4			Background	PICH	1	0.2	705.6	31	658.8	929.1	2.4
		BLM	6	0.4	4629.6	401.2	3780	5716.9	6.4			Background	TOP3A	2	0.2	2717.1	153.8	2406	2962.6	2.4
		PICH	7	0.2	980.2	56	842.3	1079.8	3.4			Background	BLM	3	0.2	3558.9	200.4	3257.9	4006.5	2.4
		TOP3A	8	0.2	5805.1	561.6	4630	6769.7	3.4				PICH	4	0.2	1216.9	115.6	903	1427.7	2.6
		BLM	9	0.2	4377	406.3	3866.2	5160.5	3.4				TOP3A	5	0.2	2545.3	214.1	2144	3066.8	2.6
		PICH	10	0.1	957.4	44.3	871.4	1040.7	1.6				BLM	6	0.2	3502.8	157.3	3044.5	3842.4	2.6
		TOP3A	11	0.1	4686.3	222.9	4151	5206.8	1.6				PICH	7	0.2	1070.7	79.9	891.3	1293.1	3.3
		BLM	12	0.1	4226.5	355.7	3704.2	4734.8	1.6				TOP3A	8	0.2	2728.4	278.8	2295.5	3330.8	3.3
		PICH	13	0.1	980.6	63.8	876.5	1099.6	1.2				BLM	9	0.2	3441.2	116.6	3243.5	3700	3.3
		TOP3A	14	0.1	6265.9	310.6	5716	6652.3	1.2				PICH	10	0.2	1255.9	76.1	1123.4	1427.4	3.4
		BLM	15	0.1	4821.5	371.9	4177	5242.1	1.2				TOP3A	11	0.2	2957.1	190.1	2416.5	3230.8	3.4
		PICH	16	0.1	847.2	67.3	747.8	981.6	2.1				BLM	12	0.2	3670.8	112.5	3420.1	3900.7	3.4
		TOP3A	17	0.1	6374.9	999.8	4997.5	8717.6	2.1				PICH	13	0.1	1318.6	168.3	1027.6	1650.5	1.7
		BLM	18	0.1	3986.4	160.5	3676.9	4324.8	2.1				TOP3A	14	0.1	2589.2	219.9	2266.5	2851.4	1.7
													BLM	15	0.1	3702.3	332.8	3198.3	4214	1.7
	HeLa_siCTRL_gBLMC18-TOP3A-PICH-13.czi												PICH	16	0.4	1009.5	71.7	749	1127.7	6.1
	Background	PICH	1	0.1	875.9	45	795.5	934.4	2				TOP3A	17	0.4	2904.8	419	2083	4220.9	6.1
	Background	TOP3A	2	0.1	3147.8	186.6	2847.6	3416.4	2				BLM	18	0.4	3759	281.9	3017	4362.2	6.1
	Background	BLM	3	0.1	3251.2	160	2988	3621.5	2
		PICH	4	0.2	1116.6	109.8	933.1	1351.4	3.4			HeLa_siTOP3A_gBLMC18-TOP3A-PICH-14.czi
		TOP3A	5	0.2	4415.9	461.4	3589	5447.1	3.4			Background	PICH	1	0.2	731.9	21.3	699.3	778	2.9
		BLM	6	0.2	4189.4	358.8	3577	4878.6	3.4			Background	TOP3A	2	0.2	3501	320.4	3164	4551	2.9
		PICH	7	0.1	1176.1	127.1	973	1391	2.1			Background	BLM	3	0.2	3901.1	136.3	3679	4198.5	2.9
		TOP3A	8	0.1	3986.2	398.3	3527	4739.7	2.1				PICH	4	0.4	959.7	95.7	750.9	1161.3	5.5
		BLM	9	0.1	4383.4	211.6	4080.7	4769.1	2.1				TOP3A	5	0.4	2833.3	301.4	2302.9	3645.8	5.5
		PICH	10	0.1	1338.1	137.3	1152.6	1574.9	2.2				BLM	6	0.4	3493.2	350.5	2694	4262.5	5.5
		TOP3A	11	0.1	3904.6	563	3259.8	4892.8	2.2				PICH	7	0.2	978.1	93.1	856.4	1218.9	3.2
		BLM	12	0.1	5114.9	404.6	4358.2	5712	2.2				TOP3A	8	0.2	2985	439.2	2356	3946	3.2
		PICH	13	0.1	1545.6	124.2	1287	1761	2.1				BLM	9	0.2	3712.8	323	3259	4395.2	3.2
		TOP3A	14	0.1	4642.4	312.3	3577	5106.1	2.1				PICH	10	0.2	1173.5	81	1008.2	1370.7	3
		BLM	15	0.1	5424	430.9	4460	6068.8	2.1				TOP3A	11	0.2	2721.3	203.9	2402.1	3102.5	3
		PICH	16	0.2	1434.7	106.9	1199.5	1617	2.7				BLM	12	0.2	4451.7	426.2	3663.2	5252.6	3
		TOP3A	17	0.2	4595.9	304.2	3906	5365.6	2.7				PICH	13	0.2	979.1	63.7	889	1134.5	3.1
		BLM	18	0.2	4864.6	403.8	4070	5738.1	2.7				TOP3A	14	0.2	2698.5	254	2285.4	3200.2	3.1
		PICH	19	0.1	1214.7	106.3	1001	1382.9	1.8				BLM	15	0.2	3848.1	151.5	3522.1	4099.7	3.1
		TOP3A	20	0.1	5070	380.9	4374	5841.9	1.8				PICH	16	0.5	967.3	76.6	841.7	1160.5	7.2
		BLM	21	0.1	4619.9	370.2	4054.7	5335.2	1.8				TOP3A	17	0.5	2996.2	329.6	2568.1	4006.3	7.2
		PICH	22	0.2	1288.9	102.8	1114	1474.2	2.3				BLM	18	0.5	3808.3	154.9	3525.5	4276.9	7.2
		TOP3A	23	0.2	5286.7	814.8	4043.9	6625.3	2.3				PICH	19	0.3	919.4	90	768.2	1128.8	4.9
		BLM	24	0.2	4533.2	367.3	4117.7	5556	2.3				TOP3A	20	0.3	2895.5	252.4	2415.3	3419.9	4.9
		PICH	25	0.2	1299.4	110.8	1036.5	1495.8	3				BLM	21	0.3	3527.1	277.1	2903	4069.3	4.9
		TOP3A	26	0.2	5669.5	777.9	4219	6913.8	3
		BLM	27	0.2	4729.1	243.3	4018.5	5115.9	3			HeLa_siTOP3A_gBLMC18-TOP3A-PICH-15.czi
		PICH	28	0.1	1507.6	96.8	1346.5	1710.8	2			Background	PICH	1	0.2	734.8	23.2	690.3	778.3	3
		TOP3A	29	0.1	4733.2	176.5	4379.5	5065.6	2			Background	TOP3A	2	0.2	4339.1	474.1	3488.9	5279.7	3
		BLM	30	0.1	5169.3	385.6	4442.8	5749.3	2			Background	BLM	3	0.2	3968.9	182.7	3608.5	4283.3	3
		PICH	31	0.2	1142.3	103.4	937.5	1337.5	2.3				PICH	4	0.2	900.4	86	774.9	1084.1	2.8
		TOP3A	32	0.2	4374.8	492	3685.3	5239.1	2.3				TOP3A	5	0.2	3508.9	235.2	3128.2	3867.1	2.8
		BLM	33	0.2	4315.3	270	3932.6	4848.4	2.3				BLM	6	0.2	3819.1	88.8	3658.2	3999.7	2.8
		PICH	34	0.2	1060.4	104.5	906	1241.5	3.1				PICH	7	0.3	870.2	48.5	798	988	3.9
		TOP3A	35	0.2	3514	327.7	3075	4202.3	3.1				TOP3A	8	0.3	3745.2	552.7	2850.5	5008.2	3.9
		BLM	36	0.2	3795.9	194.5	3504.9	4403.5	3.1				BLM	9	0.3	3900.6	287.9	3276.7	4383.2	3.9
													PICH	10	0.1	1081.5	54.5	974.8	1178.1	1.4
	HeLa_siCTRL_gBLMC18-TOP3A-PICH-14.czi												TOP3A	11	0.1	4024.9	196.4	3749.2	4344.7	1.4
	Background	PICH	1	0.2	846.2	44.1	768.3	953.9	2.7				BLM	12	0.1	4218.6	197.9	3874.9	4561.9	1.4
	Background	TOP3A	2	0.2	3857.3	183.3	3555.3	4256.5	2.7				PICH	13	0.1	1078.2	51.4	978.7	1154.2	1.7
	Background	BLM	3	0.2	4127.6	108.2	3905.6	4405.7	2.7				TOP3A	14	0.1	3956.8	223.2	3584.9	4344.7	1.7
		PICH	4	0.2	1172.9	163	863	1473	2.6				BLM	15	0.1	4254.1	145.3	3890	4501	1.7
		TOP3A	5	0.2	4979.7	647.3	4011	6075.5	2.6				PICH	16	0.1	1020	76.8	899	1138.5	1.5
		BLM	6	0.2	5762.6	624.9	4783	7330.5	2.6				TOP3A	17	0.1	3723.3	171.6	3266.5	3924.1	1.5
		PICH	7	0.3	918.3	49.5	794.6	1034.9	3.9				BLM	18	0.1	3854.3	92.6	3642.5	4019.7	1.5
		TOP3A	8	0.3	4657.5	456.4	3885	5393.4	3.9				PICH	19	0.1	1047.8	84.7	833	1193.6	1.6
		BLM	9	0.3	4403.7	257.7	3809.8	4901.4	3.9				TOP3A	20	0.1	3491.4	280.5	2998.8	3948.4	1.6
		PICH	10	0.2	1183.8	51.5	1069.5	1295.1	2.9				BLM	21	0.1	3807.6	190.5	3520.5	4293.1	1.6
		TOP3A	11	0.2	5452.5	428.7	4380.2	6388.6	2.9				PICH	22	0.2	1036.5	97.8	856	1279.5	2.7
		BLM	12	0.2	5737.6	331.8	5138.2	6486.7	2.9				TOP3A	23	0.2	3314.9	271.3	2838	3698.3	2.7
		PICH	13	0.2	1097.8	54.2	994.9	1229.5	2.5				BLM	24	0.2	3574.6	258	3096	3966.8	2.7
		TOP3A	14	0.2	6868.7	632.4	5400	7715.2	2.5
		BLM	15	0.2	5020.4	272.6	4636.5	5525.2	2.5
		PICH	16	0.2	1177.2	98.7	993	1354	2.3
		TOP3A	17	0.2	5825	466.9	4872	6617	2.3
		BLM	18	0.2	5449.3	346	4577	6044	2.3
		PICH	19	0.2	1276.6	103.9	1052.5	1477.8	2.8
		TOP3A	20	0.2	5466	551.3	4333.9	6343.5	2.8
		BLM	21	0.2	5713	363.1	4969.4	6328.5	2.8
		PICH	22	0.2	1161.1	86.9	942.8	1308.1	3.7
		TOP3A	23	0.2	6649.6	915.6	4519	8235.7	3.7
		BLM	24	0.2	5555.1	698.3	4085.2	6700.3	3.7
		PICH	25	0.3	1120.9	68.9	974.3	1273.5	4.1
		TOP3A	26	0.3	6275.4	682.9	4940	7694	4.1
		BLM	27	0.3	5078.9	511.7	4422.7	6260.7	4.1
		PICH	28	0.1	1003.2	53.1	909.4	1099.5	2
		TOP3A	29	0.1	5438.6	438.3	4469.5	6147.3	2
		BLM	30	0.1	4967.1	234.2	4670	5510.6	2
		PICH	31	0.1	1274.7	153.1	992	1503.8	1.6
		TOP3A	32	0.1	4580.6	491	3803.7	5239.6	1.6
		BLM	33	0.1	5447.8	270.8	5014.8	6023	1.6
		PICH	34	0.1	1255.9	90.7	1092.9	1453	1.8
		TOP3A	35	0.1	5316.5	448.8	4668	6146.4	1.8
		BLM	36	0.1	6005.5	472.7	5312.5	7070.9	1.8
		PICH	37	0.5	1151	126.9	938.5	1520.8	7.4
		TOP3A	38	0.5	5391.3	572.3	4368.5	7055.2	7.4
		BLM	39	0.5	5109.2	325.3	4538.7	6564.8	7.4
	HeLa_siCTRL_gBLMC18-TOP3A-PICH-15.czi
	Background	PICH	1	1	887	32.1	808.6	1019.1	15.8
	Background	TOP3A	2	1	3844.2	318.6	3138.3	5069.7	15.8
	Background	BLM	3	1	4575	244.3	4128.2	5297.7	15.8
		PICH	4	0.5	1190.8	144.7	946.4	1630.5	8.1
		TOP3A	5	0.5	5316	848.9	3742.8	7653.9	8.1
		BLM	6	0.5	5909.6	807.6	4535.3	7436.6	8.1
		PICH	7	0.5	1282.1	183.7	1043	1939.5	7.1
		TOP3A	8	0.5	5512.6	906.8	4366.5	7991.8	7.1
		BLM	9	0.5	6342.6	602.1	4977.8	7409	7.1
		PICH	10	0.4	1270.3	102.1	1055.5	1507.5	5.7
		TOP3A	11	0.4	5765.2	681.8	4717	6986.3	5.7
		BLM	12	0.4	6377.6	434.4	5158	7412.6	5.7
		PICH	13	0.4	1223.1	85.8	1097	1423.5	6.1
		TOP3A	14	0.4	5364.7	599.2	4073	6222.6	6.1
		BLM	15	0.4	6003.8	478.3	4967.5	7014.4	6.1
		PICH	16	0.4	1187.1	102.3	990.3	1426.7	6.5
		TOP3A	17	0.4	5013.7	614.1	3797.4	6340.9	6.5
		BLM	18	0.4	5998.8	699.7	4486.9	7518	6.5
		PICH	19	0.4	1146.8	76.6	1036.3	1450.1	6.6
		TOP3A	20	0.4	5062.5	518.1	4043	7399.7	6.6
		BLM	21	0.4	5705.5	321.4	5115.9	6373.2	6.6
		PICH	22	0.5	1130.6	89.7	979.5	1421.6	7
		TOP3A	23	0.5	4811.6	380.2	3829.3	5587.2	7
		BLM	24	0.5	5561.4	326.5	4783.9	6221.9	7
		PICH	25	0.3	1228.8	102.5	1019	1406.8	4.9
		TOP3A	26	0.3	4864.7	455.1	4212.8	6095.9	4.9
		BLM	27	0.3	5729.4	385.1	5098.9	6683.3	4.9
	HeLa_siCTRL_gBLMC18-TOP3A-PICH-16.czi
	Background	PICH	1	0.1	787.4	36.3	736.2	894.3	1.7
	Background	TOP3A	2	0.1	4300.2	430.6	3700.7	4997.6	1.7
	Background	BLM	3	0.1	3895.7	198.5	3568.5	4225.6	1.7
		PICH	4	0.2	912.3	53.6	815.5	1080.1	3.5
		TOP3A	5	0.2	5574.3	550.4	4415.5	6433.5	3.5
		BLM	6	0.2	4553.3	212.5	4220.5	5145.6	3.5
		PICH	7	0.2	1005.8	94.7	862.5	1274.5	2.3
		TOP3A	8	0.2	5777.4	1145.9	4307.5	7708.2	2.3
		BLM	9	0.2	5148.6	540.3	4230.3	6050.9	2.3
		PICH	10	0.2	1053.7	61.9	913	1161.6	2.7
		TOP3A	11	0.2	7086.5	644.9	5592.5	7892.4	2.7
		BLM	12	0.2	5808.8	338.4	4873	6620.2	2.7
		PICH	13	0.2	1190	157.5	945.5	1493.2	2.3
		TOP3A	14	0.2	7877.4	663.2	5965.5	8694.5	2.3
		BLM	15	0.2	5927.7	465.2	4969	6943.5	2.3
		PICH	16	0.1	1042.8	53.6	920.9	1149.8	1.7
		TOP3A	17	0.1	6829.3	805.6	5495	8090	1.7
		BLM	18	0.1	5715.1	238.5	5164	6137.6	1.7
		PICH	19	0.3	1070.5	147.8	843	1467.2	5.1
		TOP3A	20	0.3	6476.8	1474.2	4161.8	8681.9	5.1
		BLM	21	0.3	5205.9	746.5	3865.2	6699.3	5.1
		PICH	22	0.2	1146.9	91.5	976	1368.2	3
		TOP3A	23	0.2	6820.5	610	5570.5	7945.1	3
		BLM	24	0.2	5784.7	467.3	4935	6479.5	3
		PICH	25	0.1	1024	92.1	828.5	1158.4	2.2
		TOP3A	26	0.1	6075.6	770.1	4682	7274.5	2.2
		BLM	27	0.1	5828.9	717.9	4198.5	7038.7	2.2
		PICH	28	0.3	976.9	84.2	794	1192.8	4.9
		TOP3A	29	0.3	6184	702.5	4308.8	7155.8	4.9
		BLM	30	0.3	5558.8	646.7	3995.5	6598.2	4.9
		PICH	31	0.2	961	61.6	844.1	1087.5	3.3
		TOP3A	32	0.2	5180.2	536.7	3985.4	6043.1	3.3
		BLM	33	0.2	4540.8	383.6	3712.1	5196.6	3.3
		PICH	34	0.4	1008.7	105.5	831.5	1364.1	6.7
		TOP3A	35	0.4	6316.9	801.6	5049.5	8546	6.7
		BLM	36	0.4	5089.8	480.4	4260.4	6231.1	6.7

## Sheet: U2OS Analysis UFBs
	U2OS siCTRL											U2OS siTOP3A									U2OS siCTRL: Absolute values				U2OS siCTRL : Ratio			U2OS siTOP3A: Absolute values				U2OS siTOP3A: Ratio
	U2OS_siCTRL_gBLMC18-TOP3A-PICH-04.czi		Mean		Background correction			Values				U2OS_siTOP3A_gBLMC18-TOP3A-PICH-03.czi		Mean		Background correction			Values		BLM	PICH	TOP3A		BLM/PICH	TOP3A/PICH		BLM	PICH	TOP3A		BLM/PICH	TOP3A/PICH
	Background	PICH	1032.4		BLM	4230.6						Background	PICH	835.6		BLM	3174.9
	Background	TOP3A	3437.2		BLM	5340.6	1110	1110				Background	TOP3A	2875.9		BLM	3097.5	-77.4	0		1110	443.8	1978.5		2.50113	4.45809		0	97.3	0		0	0
	Background	BLM	4230.6		BLM	5226.2	995.6	995.6				Background	BLM	3174.9		BLM	3393.9	219	219		995.6	287	2192.5		3.46899	7.63937		219	196.2	0		1.11621	0
		PICH	1476.2		BLM	5943.9	1713.3	1713.3					PICH	932.9		BLM	3218.8	43.9	43.9		1713.3	457.9	3131.5		3.74165	6.83883		43.9	153.6	0		0.285807	0
		TOP3A	5415.7		BLM	5369	1138.4	1138.4					TOP3A	2518.7		BLM	3301.9	127	127		1138.4	388.8	1448.3		2.92798	3.72505		127	151	0		0.84106	0
		BLM	5340.6		BLM	5481	1250.4	1250.4					BLM	3097.5		PICH	835.6				1250.4	284	2486.4		4.40282	8.75493
		PICH	1319.4		BLM	4969	738.4	738.4					PICH	1031.8		PICH	932.9	97.3	97.3		738.4	259.1	770.6		2.84986	2.97414		145.3	380.1	0		0.382268	0
		TOP3A	5629.7		PICH	1032.4							TOP3A	2478.2		PICH	1031.8	196.2	196.2									0	315.3	0		0	0
		BLM	5226.2		PICH	1476.2	443.8	443.8					BLM	3393.9		PICH	989.2	153.6	153.6		902.1	173	1787.1		5.21445	10.3301		134.9	412.7	0		0.326872	0
		PICH	1490.3		PICH	1319.4	287	287					PICH	989.2		PICH	986.6	151	151									486	710.2	0		0.684314	0
		TOP3A	6568.7		PICH	1490.3	457.9	457.9					TOP3A	2441.8		TOP3A	2875.9				1041.2	713.7	526.8		1.45888	0.738125		274.1	500.3	0		0.547871	0
		BLM	5943.9		PICH	1421.2	388.8	388.8					BLM	3218.8		TOP3A	2518.7	-357.2	0		1250.2	657.8	1033.1		1.90058	1.57054		544.8	519.4	0		1.0489	0
		PICH	1421.2		PICH	1316.4	284	284					PICH	986.6		TOP3A	2478.2	-397.7	0		1259.4	515.9	1707.1		2.44117	3.30897		297.4	378.7	0		0.785318	0
		TOP3A	4885.5		PICH	1291.5	259.1	259.1					TOP3A	2574.8		TOP3A	2441.8	-434.1	0		1327.8	587.6	1523.6		2.2597	2.59292		234.2	320.4	200.9		0.730961	0.627029
		BLM	5369		TOP3A	3437.2							BLM	3301.9		TOP3A	2574.8	-301.1	0		843.6	691	637		1.22084	0.921852		217.5	469.2	0		0.463555	0
		PICH	1316.4		TOP3A	5415.7	1978.5	1978.5													855.8	833.9	609.3		1.02626	0.730663		140.3	222.9	0		0.62943	0
		TOP3A	5923.6		TOP3A	5629.7	2192.5	2192.5				U2OS_siTOP3A_gBLMC18-TOP3A-PICH-04.czi									836.3	493.6	923.4		1.69429	1.87075
		BLM	5481		TOP3A	6568.7	3131.5	3131.5				Background	PICH	866.7		BLM	3993.2											175	296	272.8		0.591216	0.921622
		PICH	1291.5		TOP3A	4885.5	1448.3	1448.3				Background	TOP3A	3243.3		BLM	4138.5	145.3	145.3		907.7	627.6	1956.8		1.4463	3.11791		0	167.1	0		0	0
		TOP3A	4207.8		TOP3A	5923.6	2486.4	2486.4				Background	BLM	3993.2		BLM	3988.6	-4.6	0		1447.1	435.5	1784.6		3.32285	4.09782		224.7	395.8	0		0.567711	0
		BLM	4969		TOP3A	4207.8	770.6	770.6					PICH	1246.8		BLM	4128.1	134.9	134.9		818	533.8	1072.6		1.53241	2.00937		359.6	386.1	0		0.931365	0
													TOP3A	2533.6		BLM	4479.2	486	486		966.9	503.6	1492.7		1.91998	2.96406		424.3	400.3	111.9		1.05996	0.27954
	U2OS_siCTRL_gBLMC18-TOP3A-PICH-05.czi												BLM	4138.5		BLM	4267.3	274.1	274.1		1389.9	516.1	3182		2.69308	6.16547		695.2	586.9	332.3		1.18453	0.566195
	Background	PICH	988.2		BLM	3758.8							PICH	1182		BLM	4538	544.8	544.8		1275.4	521.6	3427.6		2.44517	6.57132		749.5	592.2	794.4		1.26562	1.34144
	Background	TOP3A	3355.4		BLM	4660.9	902.1	902.1					TOP3A	2675.8		BLM	4290.6	297.4	297.4		1467.2	708.7	3043.8		2.07027	4.29491		1100.3	625.5	547.2		1.75907	0.87482
	Background	BLM	3758.8		PICH	988.2							BLM	3988.6		BLM	4227.4	234.2	234.2		1809	910.9	2609.3		1.98595	2.86453		900.1	746.4	615.3		1.20592	0.824357
		PICH	1161.2		PICH	1161.2	173	173					PICH	1279.4		BLM	4210.7	217.5	217.5		1918.5	698.7	2366.4		2.74581	3.38686		818.4	691.1	642.7		1.1842	0.929967
		TOP3A	5142.5		TOP3A	3355.4							TOP3A	2681.9		BLM	4133.5	140.3	140.3		1064	411.5	1713.7		2.58566	4.16452		819.4	583.3	503.5		1.40477	0.863192
		BLM	4660.9		TOP3A	5142.5	1787.1	1787.1					BLM	4128.1		PICH	866.7											669.7	642.1	604.3		1.04298	0.941131
													PICH	1576.9		PICH	1246.8	380.1	380.1		575.3	66.4	442.9		8.66416	6.67018		445	443.1	189		1.00429	0.42654
	U2OS_siCTRL_gBLMC18-TOP3A-PICH-06.czi												TOP3A	2909.4		PICH	1182	315.3	315.3		444.9	118.1	558.2		3.76715	4.7265		81.6	263.9	0		0.309208	0
	Background	PICH	1025.4		BLM	3873.5							BLM	4479.2		PICH	1279.4	412.7	412.7		705.1	201	1074.1		3.50796	5.34378
	Background	TOP3A	3167.9		BLM	4914.7	1041.2	1041.2					PICH	1367		PICH	1576.9	710.2	710.2		1049	325.6	1988.8		3.22174	6.10811		0	368.2	259.9		0	0.705866
	Background	BLM	3873.5		BLM	5123.7	1250.2	1250.2					TOP3A	2858.6		PICH	1367	500.3	500.3		1047.6	282.8	1528.6		3.70438	5.40523		0	389.5	171.8		0	0.441078
		PICH	1739.1		BLM	5132.9	1259.4	1259.4					BLM	4267.3		PICH	1386.1	519.4	519.4		1111.3	362	1414.7		3.06989	3.90801		0	309.1	0		0	0
		TOP3A	3694.7		BLM	5201.3	1327.8	1327.8					PICH	1386.1		PICH	1245.4	378.7	378.7		758.7	263.2	1124.9		2.8826	4.27394		0	409.2	127.8		0	0.312317
		BLM	4914.7		BLM	4717.1	843.6	843.6					TOP3A	3083.7		PICH	1187.1	320.4	320.4		539.3	151.9	394.8		3.55036	2.59908		0	508.7	614.5		0	1.20798
		PICH	1683.2		BLM	4729.3	855.8	855.8					BLM	4538		PICH	1335.9	469.2	469.2		1268.9	157.9	937.1		8.0361	5.93477		396.9	536.4	461		0.739933	0.859433
		TOP3A	4201		BLM	4709.8	836.3	836.3					PICH	1245.4		PICH	1089.6	222.9	222.9									657.4	771.7	812		0.851885	1.05222
		BLM	5123.7		PICH	1025.4							TOP3A	3092.1		TOP3A	3243.3				827.8	138.4	1795.6		5.98121	12.974		631.5	369.1	534.4		1.71092	1.44785
		PICH	1541.3		PICH	1739.1	713.7	713.7					BLM	4290.6		TOP3A	2533.6	-709.7	0		1221.8	201.2	2003.1		6.07256	9.95577
		TOP3A	4875		PICH	1683.2	657.8	657.8					PICH	1187.1		TOP3A	2675.8	-567.5	0		1290.7	361.7	1929		3.56843	5.33315		404.4	289.8	0		1.39545	0
		BLM	5132.9		PICH	1541.3	515.9	515.9					TOP3A	3444.2		TOP3A	2681.9	-561.4	0		1333.5	261.4	2189.1		5.10138	8.37452		531.7	460.1	0		1.15562	0
		PICH	1613		PICH	1613	587.6	587.6					BLM	4227.4		TOP3A	2909.4	-333.9	0		1054.9	160.8	1805.1		6.56032	11.2257		661.2	401.6	0		1.64641	0
		TOP3A	4691.5		PICH	1716.4	691	691					PICH	1335.9		TOP3A	2858.6	-384.7	0		627	109.8	1010.5		5.71038	9.2031		253	357.2	0		0.708287	0
		BLM	5201.3		PICH	1859.3	833.9	833.9					TOP3A	3182.3		TOP3A	3083.7	-159.6	0		677.4	141.2	660.6		4.79745	4.67847		530.7	446.6	33.2		1.18831	0.0743395
		PICH	1716.4		PICH	1519	493.6	493.6					BLM	4210.7		TOP3A	3092.1	-151.2	0		331.4	64.9	518.4		5.10632	7.98767		513.3	520.3	0		0.986546	0
		TOP3A	3804.9		TOP3A	3167.9							PICH	1089.6		TOP3A	3444.2	200.9	200.9									374.8	426.4	0		0.878987	0
		BLM	4717.1		TOP3A	3694.7	526.8	526.8					TOP3A	2643.9		TOP3A	3182.3	-61	0		630.5	213.7	511.4		2.9504	2.39307		664.9	544.8	0		1.22045	0
		PICH	1859.3		TOP3A	4201	1033.1	1033.1					BLM	4133.5		TOP3A	2643.9	-599.4	0		196.6	70.5	0		2.78865	0		834	599.9	0		1.39023	0
		TOP3A	3777.2		TOP3A	4875	1707.1	1707.1																				868.5	638.4	0		1.36043	0
		BLM	4729.3		TOP3A	4691.5	1523.6	1523.6				U2OS_siTOP3A_gBLMC18-TOP3A-PICH-05.czi									1398.3	450.3	2260.8		3.10526	5.02065		393.4	485.1	0		0.810967	0
		PICH	1519		TOP3A	3804.9	637	637				Background	PICH	846		BLM	3572				1373.1	309.7	1848.7		4.43365	5.96933		0	201	0		0	0
		TOP3A	4091.3		TOP3A	3777.2	609.3	609.3				Background	TOP3A	2812.2		BLM	3747	175	175		869	387.4	2405.6		2.24316	6.2096
		BLM	4709.8		TOP3A	4091.3	923.4	923.4				Background	BLM	3572		BLM	3558.3	-13.7	0		1083.1	325.2	1875.1		3.33057	5.76599		186.9	154.1	0		1.21285	0
													PICH	1142		BLM	3796.7	224.7	224.7									593.1	339.3	263.2		1.74801	0.775715
	U2OS_siCTRL_gBLMC18-TOP3A-PICH-07.czi												TOP3A	3085		BLM	3931.6	359.6	359.6		852.8	279.1	690.5		3.05554	2.47402		464.6	315.6	244		1.47212	0.773131
	Background	PICH	1006.4		BLM	4427.3							BLM	3747		BLM	3996.3	424.3	424.3									522.9	345	85.9		1.51565	0.248986
	Background	TOP3A	3303.5		BLM	5335	907.7	907.7					PICH	1013.1		BLM	4267.2	695.2	695.2		241.6	121.4	0		1.99012	0		306.8	225.8	58.5		1.35872	0.259079
	Background	BLM	4427.3		BLM	5874.4	1447.1	1447.1					TOP3A	2537.1		BLM	4321.5	749.5	749.5		959.3	245	774.7		3.91551	3.16204		724.5	438.3	65		1.65298	0.1483
		PICH	1634		BLM	5245.3	818	818					BLM	3558.3		BLM	4672.3	1100.3	1100.3		1319.4	237.7	1920		5.55069	8.07741		298.1	311.7	0		0.956368	0
		TOP3A	5260.3		BLM	5394.2	966.9	966.9					PICH	1241.8		BLM	4472.1	900.1	900.1		1789	340.4	1751.6		5.25558	5.14571
		BLM	5335		BLM	5817.2	1389.9	1389.9					TOP3A	2791.8		BLM	4390.4	818.4	818.4		1065.9	236.3	1402.7		4.51079	5.9361		0	240.8	0		0	0
		PICH	1441.9		BLM	5702.7	1275.4	1275.4					BLM	3796.7		BLM	4391.4	819.4	819.4		1497	261.7	1445.9		5.72029	5.52503		0	283.8	0		0	0
		TOP3A	5088.1		BLM	5894.5	1467.2	1467.2					PICH	1232.1		BLM	4241.7	669.7	669.7		993.3	299.5	1324.7		3.31653	4.42304		64.7	562.7	0		0.114981	0
		BLM	5874.4		BLM	6236.3	1809	1809					TOP3A	2732.1		BLM	4017	445	445		839.2	263.2	1342.5		3.18845	5.10068		104.3	455.5	0		0.228979	0
		PICH	1540.2		BLM	6345.8	1918.5	1918.5					BLM	3931.6		BLM	3653.6	81.6	81.6		710	221	1043.1		3.21267	4.71991		216.2	542.8	0		0.398305	0
		TOP3A	4376.1		BLM	5491.3	1064	1064					PICH	1246.3		PICH	846											0	485.7	0		0	0
		BLM	5245.3		PICH	1006.4							TOP3A	2924.1		PICH	1142	296	296		485.5	216.3	385.8		2.24457	1.78363		0	425.2	0		0	0
		PICH	1510		PICH	1634	627.6	627.6					BLM	3996.3		PICH	1013.1	167.1	167.1		708.7	303.4	487.1		2.33586	1.60547		136.9	462.6	0		0.295936	0
		TOP3A	4796.2		PICH	1441.9	435.5	435.5					PICH	1432.9		PICH	1241.8	395.8	395.8		986.9	466.9	925.1		2.11373	1.98137		449.5	604.8	0		0.743221	0
		BLM	5394.2		PICH	1540.2	533.8	533.8					TOP3A	3144.5		PICH	1232.1	386.1	386.1		1284.2	416.9	1216.8		3.08036	2.91869		176.7	456.6	0		0.386991	0
		PICH	1522.5		PICH	1510	503.6	503.6					BLM	4267.2		PICH	1246.3	400.3	400.3		1765.7	646.3	1605.8		2.73201	2.4846		0	332.3	0		0	0
		TOP3A	6485.5		PICH	1522.5	516.1	516.1					PICH	1438.2		PICH	1432.9	586.9	586.9		1713.1	579.9	1857.9		2.95413	3.20383
		BLM	5817.2		PICH	1528	521.6	521.6					TOP3A	3606.6		PICH	1438.2	592.2	592.2		2033.8	644.1	2015.9		3.15758	3.12979		412	473.3	181.5		0.870484	0.383478
		PICH	1528		PICH	1715.1	708.7	708.7					BLM	4321.5		PICH	1471.5	625.5	625.5		1405.9	455.5	1724.8		3.0865	3.78661		692.4	510.8	79.5		1.35552	0.155638
		TOP3A	6731.1		PICH	1917.3	910.9	910.9					PICH	1471.5		PICH	1592.4	746.4	746.4		2017.2	569.6	2462.3		3.54143	4.32286		630.7	518	30.2		1.21757	0.0583012
		BLM	5702.7		PICH	1705.1	698.7	698.7					TOP3A	3359.4		PICH	1537.1	691.1	691.1		1732.2	657.5	2315		2.63452	3.52091		490.8	754.7	63.3		0.650325	0.0838744
		PICH	1715.1		PICH	1417.9	411.5	411.5					BLM	4672.3		PICH	1429.3	583.3	583.3		1561.9	569	1954.3		2.74499	3.43462		354.5	703.7	0		0.503766	0
		TOP3A	6347.3		TOP3A	3303.5							PICH	1592.4		PICH	1488.1	642.1	642.1		1622.3	627.9	1653.6		2.58369	2.63354		300.3	532.9	0		0.56352	0
		BLM	5894.5		TOP3A	5260.3	1956.8	1956.8					TOP3A	3427.5		PICH	1289.1	443.1	443.1		1573.9	555.7	1927.5		2.83228	3.4686		122.4	590.3	0		0.207352	0
		PICH	1917.3		TOP3A	5088.1	1784.6	1784.6					BLM	4472.1		PICH	1109.9	263.9	263.9		1436.5	585.1	1281.3		2.45514	2.18988		0	308.3	0		0	0
		TOP3A	5912.8		TOP3A	4376.1	1072.6	1072.6					PICH	1537.1		TOP3A	2812.2				1186.3	431.4	958.1		2.74988	2.22091
		BLM	6236.3		TOP3A	4796.2	1492.7	1492.7					TOP3A	3454.9		TOP3A	3085	272.8	272.8									345	248.9	413.9		1.3861	1.66292
		PICH	1705.1		TOP3A	6485.5	3182	3182					BLM	4390.4		TOP3A	2537.1	-275.1	0		860.8	359.8	624.2		2.39244	1.73485		642.9	447.8	390.5		1.43569	0.872041
		TOP3A	5669.9		TOP3A	6731.1	3427.6	3427.6					PICH	1429.3		TOP3A	2791.8	-20.4	0		964.7	369.5	901.9		2.61083	2.44087		439.6	340.7	354.9		1.29028	1.04168
		BLM	6345.8		TOP3A	6347.3	3043.8	3043.8					TOP3A	3315.7		TOP3A	2732.1	-80.1	0		849.4	273.9	1047.4		3.10113	3.82402		741.3	484.8	574.4		1.52908	1.18482
		PICH	1417.9		TOP3A	5912.8	2609.3	2609.3					BLM	4391.4		TOP3A	2924.1	111.9	111.9		1143.9	261.4	1830.2		4.37605	7.00153		433.7	295.2	270.8		1.46917	0.917344
		TOP3A	5017.2		TOP3A	5669.9	2366.4	2366.4					PICH	1488.1		TOP3A	3144.5	332.3	332.3		1148.7	280.3	2266.4		4.09811	8.08562		701.7	531.1	185.5		1.32122	0.349275
		BLM	5491.3		TOP3A	5017.2	1713.7	1713.7					TOP3A	3416.5		TOP3A	3606.6	794.4	794.4		1032	364.1	2076.7		2.83439	5.70365		416.3	426.4	118		0.976313	0.276735
													BLM	4241.7		TOP3A	3359.4	547.2	547.2		696.1	294.8	1044.2		2.36126	3.54206		334.7	382.3	260.8		0.87549	0.682187
	U2OS_siCTRL_gBLMC18-TOP3A-PICH-09.czi												PICH	1289.1		TOP3A	3427.5	615.3	615.3		928.9	214.9	2035.2		4.32248	9.47045		370.2	359.5	2.2		1.02976	0.00611961
	Background	PICH	963.2		BLM	3657.6							TOP3A	3001.2		TOP3A	3454.9	642.7	642.7									187.4	313.2	47.8		0.59834	0.152618
	Background	TOP3A	3283.2		BLM	4232.9	575.3	575.3					BLM	4017		TOP3A	3315.7	503.5	503.5									141.1	290.3	0		0.486049	0
	Background	BLM	3657.6		BLM	4102.5	444.9	444.9					PICH	1109.9		TOP3A	3416.5	604.3	604.3									141.4	254.6	0		0.555381	0
		PICH	1029.6		BLM	4362.7	705.1	705.1					TOP3A	2533		TOP3A	3001.2	189	189
		TOP3A	3726.1		BLM	4706.6	1049	1049					BLM	3653.6		TOP3A	2533	-279.2	0									2.8	256.7	0		0.0109077	0
		BLM	4232.9		BLM	4705.2	1047.6	1047.6																				347.7	469.4	30.9		0.740733	0.0658287
		PICH	1081.3		BLM	4768.9	1111.3	1111.3				U2OS_siTOP3A_gBLMC18-TOP3A-PICH-10.czi																361.5	372.8	292.5		0.969689	0.784603
		TOP3A	3841.4		BLM	4416.3	758.7	758.7				Background	PICH	907.8		BLM	4330.3											446.8	418.2	314.8		1.06839	0.75275
		BLM	4102.5		BLM	4196.9	539.3	539.3				Background	TOP3A	3362.2		BLM	3980	-350.3	0									431.4	386.4	403.4		1.11646	1.044
		PICH	1164.2		BLM	4926.5	1268.9	1268.9				Background	BLM	4330.3		BLM	4184.7	-145.6	0									611	529.2	474.5		1.15457	0.896636
		TOP3A	4357.3		PICH	963.2							PICH	1276		BLM	4069.5	-260.8	0									521.9	500.9	347.2		1.04192	0.693152
		BLM	4362.7		PICH	1029.6	66.4	66.4					TOP3A	3622.1		BLM	4183.4	-146.9	0									609.6	510.1	166.3		1.19506	0.326015
		PICH	1288.8		PICH	1081.3	118.1	118.1					BLM	3980		BLM	4273	-57.3	0									755.3	691.3	168.9		1.09258	0.244322
		TOP3A	5272		PICH	1164.2	201	201					PICH	1297.3		BLM	4727.2	396.9	396.9									490.3	365.2	184.7		1.34255	0.50575
		BLM	4706.6		PICH	1288.8	325.6	325.6					TOP3A	3534		BLM	4987.7	657.4	657.4									445.3	338.5	286.4		1.31551	0.846086
		PICH	1246		PICH	1246	282.8	282.8					BLM	4184.7		BLM	4961.8	631.5	631.5
		TOP3A	4811.8		PICH	1325.2	362	362					PICH	1216.9		PICH	907.8											258.4	290.1	128.8		0.890727	0.443985
		BLM	4705.2		PICH	1226.4	263.2	263.2					TOP3A	3324.5		PICH	1276	368.2	368.2									278.2	349.3	469.9		0.79645	1.34526
		PICH	1325.2		PICH	1115.1	151.9	151.9					BLM	4069.5		PICH	1297.3	389.5	389.5									167.3	324.4	360.5		0.515721	1.11128
		TOP3A	4697.9		PICH	1121.1	157.9	157.9					PICH	1317		PICH	1216.9	309.1	309.1									187.8	281.1	514.3		0.66809	1.8296
		BLM	4768.9		TOP3A	3283.2							TOP3A	3490		PICH	1317	409.2	409.2									436	359.4	825.8		1.21313	2.29772
		PICH	1226.4		TOP3A	3726.1	442.9	442.9					BLM	4183.4		PICH	1416.5	508.7	508.7									653.1	412.8	973.9		1.58212	2.35925
		TOP3A	4408.1		TOP3A	3841.4	558.2	558.2					PICH	1416.5		PICH	1444.2	536.4	536.4									526	341.1	1249.1		1.54207	3.66198
		BLM	4416.3		TOP3A	4357.3	1074.1	1074.1					TOP3A	3976.7		PICH	1679.5	771.7	771.7									544.3	367.4	744.2		1.48149	2.02559
		PICH	1115.1		TOP3A	5272	1988.8	1988.8					BLM	4273		PICH	1276.9	369.1	369.1									481.5	298.7	827.8		1.61199	2.77134
		TOP3A	3678		TOP3A	4811.8	1528.6	1528.6					PICH	1444.2		TOP3A	3362.2
		BLM	4196.9		TOP3A	4697.9	1414.7	1414.7					TOP3A	3823.2		TOP3A	3622.1	259.9	259.9									263.8	688.1	93.8		0.383375	0.136317
		PICH	1121.1		TOP3A	4408.1	1124.9	1124.9					BLM	4727.2		TOP3A	3534	171.8	171.8									237.6	577.5	372.3		0.411429	0.644675
		TOP3A	4220.3		TOP3A	3678	394.8	394.8					PICH	1679.5		TOP3A	3324.5	-37.7	0									414.4	707.3	556.7		0.58589	0.787078
		BLM	4926.5		TOP3A	4220.3	937.1	937.1					TOP3A	4174.2		TOP3A	3490	127.8	127.8									482.6	586.7	784.6		0.822567	1.33731
													BLM	4987.7		TOP3A	3976.7	614.5	614.5									315.4	504.6	838.4		0.62505	1.66151
	U2OS_siCTRL_gBLMC18-TOP3A-PICH-10.czi												PICH	1276.9		TOP3A	3823.2	461	461									959.3	873.7	1526		1.09797	1.74659
	Background	PICH	908.2		BLM	3777.9							TOP3A	3896.6		TOP3A	4174.2	812	812									871.5	752	1309.9		1.15891	1.74189
	Background	TOP3A	3429.9		BLM	4605.7	827.8	827.8					BLM	4961.8		TOP3A	3896.6	534.4	534.4									350.5	450.1	491.8		0.778716	1.09265
	Background	BLM	3777.9		BLM	4999.7	1221.8	1221.8
		PICH	1046.6		BLM	5068.6	1290.7	1290.7				U2OS_siTOP3A_gBLMC18-TOP3A-PICH-11.czi
		TOP3A	5225.5		BLM	5111.4	1333.5	1333.5				Background	PICH	912.4		BLM	3771.7
		BLM	4605.7		BLM	4832.8	1054.9	1054.9				Background	TOP3A	2897.8		BLM	4176.1	404.4	404.4
		PICH	1109.4		BLM	4404.9	627	627				Background	BLM	3771.7		BLM	4303.4	531.7	531.7
		TOP3A	5433		BLM	4455.3	677.4	677.4					PICH	1202.2		BLM	4432.9	661.2	661.2
		BLM	4999.7		BLM	4109.3	331.4	331.4					TOP3A	2826.6		BLM	4024.7	253	253
		PICH	1269.9		PICH	908.2							BLM	4176.1		BLM	4302.4	530.7	530.7
		TOP3A	5358.9		PICH	1046.6	138.4	138.4					PICH	1372.5		BLM	4285	513.3	513.3
		BLM	5068.6		PICH	1109.4	201.2	201.2					TOP3A	2607.9		BLM	4146.5	374.8	374.8
		PICH	1169.6		PICH	1269.9	361.7	361.7					BLM	4303.4		BLM	4436.6	664.9	664.9
		TOP3A	5619		PICH	1169.6	261.4	261.4					PICH	1314		BLM	4605.7	834	834
		BLM	5111.4		PICH	1069	160.8	160.8					TOP3A	2697.1		BLM	4640.2	868.5	868.5
		PICH	1069		PICH	1018	109.8	109.8					BLM	4432.9		BLM	4165.1	393.4	393.4
		TOP3A	5235		PICH	1049.4	141.2	141.2					PICH	1269.6		BLM	3770.8	-0.9	0
		BLM	4832.8		PICH	973.1	64.9	64.9					TOP3A	2843.5		PICH	912.4
		PICH	1018		TOP3A	3429.9							BLM	4024.7		PICH	1202.2	289.8	289.8
		TOP3A	4440.4		TOP3A	5225.5	1795.6	1795.6					PICH	1359		PICH	1372.5	460.1	460.1
		BLM	4404.9		TOP3A	5433	2003.1	2003.1					TOP3A	2931		PICH	1314	401.6	401.6
		PICH	1049.4		TOP3A	5358.9	1929	1929					BLM	4302.4		PICH	1269.6	357.2	357.2
		TOP3A	4090.5		TOP3A	5619	2189.1	2189.1					PICH	1432.7		PICH	1359	446.6	446.6
		BLM	4455.3		TOP3A	5235	1805.1	1805.1					TOP3A	2882.1		PICH	1432.7	520.3	520.3
		PICH	973.1		TOP3A	4440.4	1010.5	1010.5					BLM	4285		PICH	1338.8	426.4	426.4
		TOP3A	3948.3		TOP3A	4090.5	660.6	660.6					PICH	1338.8		PICH	1457.2	544.8	544.8
		BLM	4109.3		TOP3A	3948.3	518.4	518.4					TOP3A	2837.9		PICH	1512.3	599.9	599.9
													BLM	4146.5		PICH	1550.8	638.4	638.4
	U2OS_siCTRL_gBLMC18-TOP3A-PICH-11.czi												PICH	1457.2		PICH	1397.5	485.1	485.1
	Background	PICH	976		BLM	4314.5							TOP3A	2667.8		PICH	1113.4	201	201
	Background	TOP3A	4106.1		BLM	4945	630.5	630.5					BLM	4436.6		TOP3A	2897.8
	Background	BLM	4314.5		BLM	4511.1	196.6	196.6					PICH	1512.3		TOP3A	2826.6	-71.2	0
		PICH	1189.7		PICH	976							TOP3A	2726.3		TOP3A	2607.9	-289.9	0
		TOP3A	4617.5		PICH	1189.7	213.7	213.7					BLM	4605.7		TOP3A	2697.1	-200.7	0
		BLM	4945		PICH	1046.5	70.5	70.5					PICH	1550.8		TOP3A	2843.5	-54.3	0
		PICH	1046.5		TOP3A	4106.1							TOP3A	2855.7		TOP3A	2931	33.2	33.2
		TOP3A	4049.8		TOP3A	4617.5	511.4	511.4					BLM	4640.2		TOP3A	2882.1	-15.7	0
		BLM	4511.1		TOP3A	4049.8	-56.3	0					PICH	1397.5		TOP3A	2837.9	-59.9	0
													TOP3A	2718.9		TOP3A	2667.8	-230	0
	U2OS_siCTRL_gBLMC18-TOP3A-PICH-14.czi												BLM	4165.1		TOP3A	2726.3	-171.5	0
	Background	PICH	969.9		BLM	4344							PICH	1113.4		TOP3A	2855.7	-42.1	0
	Background	TOP3A	2975.2		BLM	5742.3	1398.3	1398.3					TOP3A	2511.2		TOP3A	2718.9	-178.9	0
	Background	BLM	4344		BLM	5717.1	1373.1	1373.1					BLM	3770.8		TOP3A	2511.2	-386.6	0
		PICH	1420.2		BLM	5213	869	869
		TOP3A	5236		BLM	5427.1	1083.1	1083.1				U2OS_siTOP3A_gBLMC18-TOP3A-PICH-12.czi
		BLM	5742.3		PICH	969.9						Background	PICH	1100.1		BLM	4698.1
		PICH	1279.6		PICH	1420.2	450.3	450.3				Background	TOP3A	4077.9		BLM	4885	186.9	186.9
		TOP3A	4823.9		PICH	1279.6	309.7	309.7				Background	BLM	4698.1		BLM	5291.2	593.1	593.1
		BLM	5717.1		PICH	1357.3	387.4	387.4					PICH	1254.2		BLM	5162.7	464.6	464.6
		PICH	1357.3		PICH	1295.1	325.2	325.2					TOP3A	3708.9		BLM	5221	522.9	522.9
		TOP3A	5380.8		TOP3A	2975.2							BLM	4885		BLM	5004.9	306.8	306.8
		BLM	5213		TOP3A	5236	2260.8	2260.8					PICH	1439.4		BLM	5422.6	724.5	724.5
		PICH	1295.1		TOP3A	4823.9	1848.7	1848.7					TOP3A	4341.1		BLM	4996.2	298.1	298.1
		TOP3A	4850.3		TOP3A	5380.8	2405.6	2405.6					BLM	5291.2		PICH	1100.1
		BLM	5427.1		TOP3A	4850.3	1875.1	1875.1					PICH	1415.7		PICH	1254.2	154.1	154.1
													TOP3A	4321.9		PICH	1439.4	339.3	339.3
	U2OS_siCTRL_gBLMC18-TOP3A-PICH-15.czi												BLM	5162.7		PICH	1415.7	315.6	315.6
	Background	PICH	974.1		BLM	4068.1							PICH	1445.1		PICH	1445.1	345	345
	Background	TOP3A	3721.5		BLM	4920.9	852.8	852.8					TOP3A	4163.8		PICH	1325.9	225.8	225.8
	Background	BLM	4068.1		PICH	974.1							BLM	5221		PICH	1538.4	438.3	438.3
		PICH	1253.2		PICH	1253.2	279.1	279.1					PICH	1325.9		PICH	1411.8	311.7	311.7
		TOP3A	4412		TOP3A	3721.5							TOP3A	4136.4		TOP3A	4077.9
		BLM	4920.9		TOP3A	4412	690.5	690.5					BLM	5004.9		TOP3A	3708.9	-369	0
													PICH	1538.4		TOP3A	4341.1	263.2	263.2
	U2OS_siCTRL_gBLMC18-TOP3A-PICH-19.czi												TOP3A	4142.9		TOP3A	4321.9	244	244
	Background	PICH	914.9		BLM	4508.9							BLM	5422.6		TOP3A	4163.8	85.9	85.9
	Background	TOP3A	3072.6		BLM	4750.5	241.6	241.6					PICH	1411.8		TOP3A	4136.4	58.5	58.5
	Background	BLM	4508.9		BLM	5468.2	959.3	959.3					TOP3A	4074.7		TOP3A	4142.9	65	65
		PICH	1036.3		BLM	5828.3	1319.4	1319.4					BLM	4996.2		TOP3A	4074.7	-3.2	0
		TOP3A	3033.8		BLM	6297.9	1789	1789
		BLM	4750.5		BLM	5574.8	1065.9	1065.9				U2OS_siTOP3A_gBLMC18-TOP3A-PICH-14.czi
		PICH	1159.9		BLM	6005.9	1497	1497				Background	PICH	927.2		BLM	4134
		TOP3A	3847.3		BLM	5502.2	993.3	993.3				Background	TOP3A	3122.2		BLM	3986.2	-147.8	0
		BLM	5468.2		BLM	5348.1	839.2	839.2				Background	BLM	4134		BLM	3843.2	-290.8	0
		PICH	1152.6		BLM	5218.9	710	710					PICH	1168		BLM	4198.7	64.7	64.7
		TOP3A	4992.6		PICH	914.9							TOP3A	2549.5		BLM	4238.3	104.3	104.3
		BLM	5828.3		PICH	1036.3	121.4	121.4					BLM	3986.2		BLM	4350.2	216.2	216.2
		PICH	1255.3		PICH	1159.9	245	245					PICH	1211		BLM	4114.2	-19.8	0
		TOP3A	4824.2		PICH	1152.6	237.7	237.7					TOP3A	2531.2		BLM	4096.4	-37.6	0
		BLM	6297.9		PICH	1255.3	340.4	340.4					BLM	3843.2		BLM	4270.9	136.9	136.9
		PICH	1151.2		PICH	1151.2	236.3	236.3					PICH	1489.9		BLM	4583.5	449.5	449.5
		TOP3A	4475.3		PICH	1176.6	261.7	261.7					TOP3A	2707.8		BLM	4310.7	176.7	176.7
		BLM	5574.8		PICH	1214.4	299.5	299.5					BLM	4198.7		BLM	4093.4	-40.6	0
		PICH	1176.6		PICH	1178.1	263.2	263.2					PICH	1382.7		PICH	927.2
		TOP3A	4518.5		PICH	1135.9	221	221					TOP3A	2690.6		PICH	1168	240.8	240.8
		BLM	6005.9		TOP3A	3072.6							BLM	4238.3		PICH	1211	283.8	283.8
		PICH	1214.4		TOP3A	3033.8	-38.8	0					PICH	1470		PICH	1489.9	562.7	562.7
		TOP3A	4397.3		TOP3A	3847.3	774.7	774.7					TOP3A	2647.1		PICH	1382.7	455.5	455.5
		BLM	5502.2		TOP3A	4992.6	1920	1920					BLM	4350.2		PICH	1470	542.8	542.8
		PICH	1178.1		TOP3A	4824.2	1751.6	1751.6					PICH	1412.9		PICH	1412.9	485.7	485.7
		TOP3A	4415.1		TOP3A	4475.3	1402.7	1402.7					TOP3A	2635		PICH	1352.4	425.2	425.2
		BLM	5348.1		TOP3A	4518.5	1445.9	1445.9					BLM	4114.2		PICH	1389.8	462.6	462.6
		PICH	1135.9		TOP3A	4397.3	1324.7	1324.7					PICH	1352.4		PICH	1532	604.8	604.8
		TOP3A	4115.7		TOP3A	4415.1	1342.5	1342.5					TOP3A	2641.7		PICH	1383.8	456.6	456.6
		BLM	5218.9		TOP3A	4115.7	1043.1	1043.1					BLM	4096.4		PICH	1259.5	332.3	332.3
													PICH	1389.8		TOP3A	3122.2
	U2OS_siCTRL_gBLMC18-TOP3A-PICH-22.czi												TOP3A	2709.4		TOP3A	2549.5	-572.7	0
	Background	PICH	904.6		BLM	3750.2							BLM	4270.9		TOP3A	2531.2	-591	0
	Background	TOP3A	2352.6		BLM	4235.7	485.5	485.5					PICH	1532		TOP3A	2707.8	-414.4	0
	Background	BLM	3750.2		BLM	4458.9	708.7	708.7					TOP3A	2966.6		TOP3A	2690.6	-431.6	0
		PICH	1120.9		BLM	4737.1	986.9	986.9					BLM	4583.5		TOP3A	2647.1	-475.1	0
		TOP3A	2738.4		BLM	5034.4	1284.2	1284.2					PICH	1383.8		TOP3A	2635	-487.2	0
		BLM	4235.7		BLM	5515.9	1765.7	1765.7					TOP3A	2965		TOP3A	2641.7	-480.5	0
		PICH	1208		BLM	5463.3	1713.1	1713.1					BLM	4310.7		TOP3A	2709.4	-412.8	0
		TOP3A	2839.7		BLM	5784	2033.8	2033.8					PICH	1259.5		TOP3A	2966.6	-155.6	0
		BLM	4458.9		BLM	5156.1	1405.9	1405.9					TOP3A	2750.8		TOP3A	2965	-157.2	0
		PICH	1371.5		BLM	5767.4	2017.2	2017.2					BLM	4093.4		TOP3A	2750.8	-371.4	0
		TOP3A	3277.7		BLM	5482.4	1732.2	1732.2
		BLM	4737.1		BLM	5312.1	1561.9	1561.9				U2OS_siTOP3A_gBLMC18-TOP3A-PICH-15.czi
		PICH	1321.5		BLM	5372.5	1622.3	1622.3				Background	PICH	922.5		BLM	4475.1
		TOP3A	3569.4		BLM	5324.1	1573.9	1573.9				Background	TOP3A	2703.7		BLM	4887.1	412	412
		BLM	5034.4		BLM	5186.7	1436.5	1436.5				Background	BLM	4475.1		BLM	5167.5	692.4	692.4
		PICH	1550.9		BLM	4936.5	1186.3	1186.3					PICH	1395.8		BLM	5105.8	630.7	630.7
		TOP3A	3958.4		PICH	904.6							TOP3A	2885.2		BLM	4965.9	490.8	490.8
		BLM	5515.9		PICH	1120.9	216.3	216.3					BLM	4887.1		BLM	4829.6	354.5	354.5
		PICH	1484.5		PICH	1208	303.4	303.4					PICH	1433.3		BLM	4775.4	300.3	300.3
		TOP3A	4210.5		PICH	1371.5	466.9	466.9					TOP3A	2783.2		BLM	4597.5	122.4	122.4
		BLM	5463.3		PICH	1321.5	416.9	416.9					BLM	5167.5		BLM	4471.6	-3.5	0
		PICH	1548.7		PICH	1550.9	646.3	646.3					PICH	1440.5		PICH	922.5
		TOP3A	4368.5		PICH	1484.5	579.9	579.9					TOP3A	2733.9		PICH	1395.8	473.3	473.3
		BLM	5784		PICH	1548.7	644.1	644.1					BLM	5105.8		PICH	1433.3	510.8	510.8
		PICH	1360.1		PICH	1360.1	455.5	455.5					PICH	1677.2		PICH	1440.5	518	518
		TOP3A	4077.4		PICH	1474.2	569.6	569.6					TOP3A	2767		PICH	1677.2	754.7	754.7
		BLM	5156.1		PICH	1562.1	657.5	657.5					BLM	4965.9		PICH	1626.2	703.7	703.7
		PICH	1474.2		PICH	1473.6	569	569					PICH	1626.2		PICH	1455.4	532.9	532.9
		TOP3A	4814.9		PICH	1532.5	627.9	627.9					TOP3A	2693.2		PICH	1512.8	590.3	590.3
		BLM	5767.4		PICH	1460.3	555.7	555.7					BLM	4829.6		PICH	1230.8	308.3	308.3
		PICH	1562.1		PICH	1489.7	585.1	585.1					PICH	1455.4		TOP3A	2703.7
		TOP3A	4667.6		PICH	1336	431.4	431.4					TOP3A	2419.8		TOP3A	2885.2	181.5	181.5
		BLM	5482.4		TOP3A	2352.6							BLM	4775.4		TOP3A	2783.2	79.5	79.5
		PICH	1473.6		TOP3A	2738.4	385.8	385.8					PICH	1512.8		TOP3A	2733.9	30.2	30.2
		TOP3A	4306.9		TOP3A	2839.7	487.1	487.1					TOP3A	2343.4		TOP3A	2767	63.3	63.3
		BLM	5312.1		TOP3A	3277.7	925.1	925.1					BLM	4597.5		TOP3A	2693.2	-10.5	0
		PICH	1532.5		TOP3A	3569.4	1216.8	1216.8					PICH	1230.8		TOP3A	2419.8	-283.9	0
		TOP3A	4006.2		TOP3A	3958.4	1605.8	1605.8					TOP3A	2332.1		TOP3A	2343.4	-360.3	0
		BLM	5372.5		TOP3A	4210.5	1857.9	1857.9					BLM	4471.6		TOP3A	2332.1	-371.6	0
		PICH	1460.3		TOP3A	4368.5	2015.9	2015.9
		TOP3A	4280.1		TOP3A	4077.4	1724.8	1724.8				U2OS_siTOP3A_gBLMC18-TOP3A-PICH-16.czi
		BLM	5324.1		TOP3A	4814.9	2462.3	2462.3				Background	PICH	858.1		BLM	3492.7
		PICH	1489.7		TOP3A	4667.6	2315	2315				Background	TOP3A	2904		BLM	3837.7	345	345
		TOP3A	3633.9		TOP3A	4306.9	1954.3	1954.3				Background	BLM	3492.7		BLM	4135.6	642.9	642.9
		BLM	5186.7		TOP3A	4006.2	1653.6	1653.6					PICH	1107		BLM	3932.3	439.6	439.6
		PICH	1336		TOP3A	4280.1	1927.5	1927.5					TOP3A	3317.9		BLM	4234	741.3	741.3
		TOP3A	3310.7		TOP3A	3633.9	1281.3	1281.3					BLM	3837.7		BLM	3926.4	433.7	433.7
		BLM	4936.5		TOP3A	3310.7	958.1	958.1					PICH	1305.9		BLM	4194.4	701.7	701.7
													TOP3A	3294.5		BLM	3909	416.3	416.3
	U2OS_siCTRL_gBLMC18-TOP3A-PICH-26.czi												BLM	4135.6		BLM	3827.4	334.7	334.7
	Background	PICH	1060.2		BLM	4014.3							PICH	1198.8		BLM	3862.9	370.2	370.2
	Background	TOP3A	3548.2		BLM	4875.1	860.8	860.8					TOP3A	3258.9		BLM	3680.1	187.4	187.4
	Background	BLM	4014.3		BLM	4979	964.7	964.7					BLM	3932.3		BLM	3633.8	141.1	141.1
		PICH	1420		BLM	4863.7	849.4	849.4					PICH	1342.9		BLM	3634.1	141.4	141.4
		TOP3A	4172.4		BLM	5158.2	1143.9	1143.9					TOP3A	3478.4		PICH	858.1
		BLM	4875.1		BLM	5163	1148.7	1148.7					BLM	4234		PICH	1107	248.9	248.9
		PICH	1429.7		BLM	5046.3	1032	1032					PICH	1153.3		PICH	1305.9	447.8	447.8
		TOP3A	4450.1		BLM	4710.4	696.1	696.1					TOP3A	3174.8		PICH	1198.8	340.7	340.7
		BLM	4979		BLM	4943.2	928.9	928.9					BLM	3926.4		PICH	1342.9	484.8	484.8
		PICH	1334.1		PICH	1060.2							PICH	1389.2		PICH	1153.3	295.2	295.2
		TOP3A	4595.6		PICH	1420	359.8	359.8					TOP3A	3089.5		PICH	1389.2	531.1	531.1
		BLM	4863.7		PICH	1429.7	369.5	369.5					BLM	4194.4		PICH	1284.5	426.4	426.4
		PICH	1321.6		PICH	1334.1	273.9	273.9					PICH	1284.5		PICH	1240.4	382.3	382.3
		TOP3A	5378.4		PICH	1321.6	261.4	261.4					TOP3A	3022		PICH	1217.6	359.5	359.5
		BLM	5158.2		PICH	1340.5	280.3	280.3					BLM	3909		PICH	1171.3	313.2	313.2
		PICH	1340.5		PICH	1424.3	364.1	364.1					PICH	1240.4		PICH	1148.4	290.3	290.3
		TOP3A	5814.6		PICH	1355	294.8	294.8					TOP3A	3164.8		PICH	1112.7	254.6	254.6
		BLM	5163		PICH	1275.1	214.9	214.9					BLM	3827.4		TOP3A	2904
		PICH	1424.3		TOP3A	3548.2							PICH	1217.6		TOP3A	3317.9	413.9	413.9
		TOP3A	5624.9		TOP3A	4172.4	624.2	624.2					TOP3A	2906.2		TOP3A	3294.5	390.5	390.5
		BLM	5046.3		TOP3A	4450.1	901.9	901.9					BLM	3862.9		TOP3A	3258.9	354.9	354.9
		PICH	1355		TOP3A	4595.6	1047.4	1047.4					PICH	1171.3		TOP3A	3478.4	574.4	574.4
		TOP3A	4592.4		TOP3A	5378.4	1830.2	1830.2					TOP3A	2951.8		TOP3A	3174.8	270.8	270.8
		BLM	4710.4		TOP3A	5814.6	2266.4	2266.4					BLM	3680.1		TOP3A	3089.5	185.5	185.5
		PICH	1275.1		TOP3A	5624.9	2076.7	2076.7					PICH	1148.4		TOP3A	3022	118	118
		TOP3A	5583.4		TOP3A	4592.4	1044.2	1044.2					TOP3A	2760.4		TOP3A	3164.8	260.8	260.8
		BLM	4943.2		TOP3A	5583.4	2035.2	2035.2					BLM	3633.8		TOP3A	2906.2	2.2	2.2
													PICH	1112.7		TOP3A	2951.8	47.8	47.8
													TOP3A	2667.2		TOP3A	2760.4	-143.6	0
													BLM	3634.1		TOP3A	2667.2	-236.8	0
												U2OS_siTOP3A_gBLMC18-TOP3A-PICH-17.czi
												Background	PICH	885.3		BLM	4171
												Background	TOP3A	2931.8		BLM	4173.8	2.8	2.8
												Background	BLM	4171		BLM	4518.7	347.7	347.7
													PICH	1142		BLM	4532.5	361.5	361.5
													TOP3A	2479.1		BLM	4617.8	446.8	446.8
													BLM	4173.8		BLM	4602.4	431.4	431.4
													PICH	1354.7		BLM	4782	611	611
													TOP3A	2962.7		BLM	4692.9	521.9	521.9
													BLM	4518.7		BLM	4780.6	609.6	609.6
													PICH	1258.1		BLM	4926.3	755.3	755.3
													TOP3A	3224.3		BLM	4661.3	490.3	490.3
													BLM	4532.5		BLM	4616.3	445.3	445.3
													PICH	1303.5		PICH	885.3
													TOP3A	3246.6		PICH	1142	256.7	256.7
													BLM	4617.8		PICH	1354.7	469.4	469.4
													PICH	1271.7		PICH	1258.1	372.8	372.8
													TOP3A	3335.2		PICH	1303.5	418.2	418.2
													BLM	4602.4		PICH	1271.7	386.4	386.4
													PICH	1414.5		PICH	1414.5	529.2	529.2
													TOP3A	3406.3		PICH	1386.2	500.9	500.9
													BLM	4782		PICH	1395.4	510.1	510.1
													PICH	1386.2		PICH	1576.6	691.3	691.3
													TOP3A	3279		PICH	1250.5	365.2	365.2
													BLM	4692.9		PICH	1223.8	338.5	338.5
													PICH	1395.4		TOP3A	2931.8
													TOP3A	3098.1		TOP3A	2479.1	-452.7	0
													BLM	4780.6		TOP3A	2962.7	30.9	30.9
													PICH	1576.6		TOP3A	3224.3	292.5	292.5
													TOP3A	3100.7		TOP3A	3246.6	314.8	314.8
													BLM	4926.3		TOP3A	3335.2	403.4	403.4
													PICH	1250.5		TOP3A	3406.3	474.5	474.5
													TOP3A	3116.5		TOP3A	3279	347.2	347.2
													BLM	4661.3		TOP3A	3098.1	166.3	166.3
													PICH	1223.8		TOP3A	3100.7	168.9	168.9
													TOP3A	3218.2		TOP3A	3116.5	184.7	184.7
													BLM	4616.3		TOP3A	3218.2	286.4	286.4
												U2OS_siTOP3A_gBLMC18-TOP3A-PICH-19.czi
												Background	PICH	833		BLM	3465.4
												Background	TOP3A	2794.2		BLM	3723.8	258.4	258.4
												Background	BLM	3465.4		BLM	3743.6	278.2	278.2
													PICH	1123.1		BLM	3632.7	167.3	167.3
													TOP3A	2923		BLM	3653.2	187.8	187.8
													BLM	3723.8		BLM	3901.4	436	436
													PICH	1182.3		BLM	4118.5	653.1	653.1
													TOP3A	3264.1		BLM	3991.4	526	526
													BLM	3743.6		BLM	4009.7	544.3	544.3
													PICH	1157.4		BLM	3946.9	481.5	481.5
													TOP3A	3154.7		PICH	833
													BLM	3632.7		PICH	1123.1	290.1	290.1
													PICH	1114.1		PICH	1182.3	349.3	349.3
													TOP3A	3308.5		PICH	1157.4	324.4	324.4
													BLM	3653.2		PICH	1114.1	281.1	281.1
													PICH	1192.4		PICH	1192.4	359.4	359.4
													TOP3A	3620		PICH	1245.8	412.8	412.8
													BLM	3901.4		PICH	1174.1	341.1	341.1
													PICH	1245.8		PICH	1200.4	367.4	367.4
													TOP3A	3768.1		PICH	1131.7	298.7	298.7
													BLM	4118.5		TOP3A	2794.2
													PICH	1174.1		TOP3A	2923	128.8	128.8
													TOP3A	4043.3		TOP3A	3264.1	469.9	469.9
													BLM	3991.4		TOP3A	3154.7	360.5	360.5
													PICH	1200.4		TOP3A	3308.5	514.3	514.3
													TOP3A	3538.4		TOP3A	3620	825.8	825.8
													BLM	4009.7		TOP3A	3768.1	973.9	973.9
													PICH	1131.7		TOP3A	4043.3	1249.1	1249.1
													TOP3A	3622		TOP3A	3538.4	744.2	744.2
													BLM	3946.9		TOP3A	3622	827.8	827.8
												U2OS_siTOP3A_gBLMC18-TOP3A-PICH-25.czi
												Background	PICH	858.6		BLM	3823.6
												Background	TOP3A	3271.2		BLM	4087.4	263.8	263.8
												Background	BLM	3823.6		BLM	4061.2	237.6	237.6
													PICH	1546.7		BLM	4238	414.4	414.4
													TOP3A	3365		BLM	4306.2	482.6	482.6
													BLM	4087.4		BLM	4139	315.4	315.4
													PICH	1436.1		BLM	4782.9	959.3	959.3
													TOP3A	3643.5		BLM	4695.1	871.5	871.5
													BLM	4061.2		BLM	4174.1	350.5	350.5
													PICH	1565.9		PICH	858.6
													TOP3A	3827.9		PICH	1546.7	688.1	688.1
													BLM	4238		PICH	1436.1	577.5	577.5
													PICH	1445.3		PICH	1565.9	707.3	707.3
													TOP3A	4055.8		PICH	1445.3	586.7	586.7
													BLM	4306.2		PICH	1363.2	504.6	504.6
													PICH	1363.2		PICH	1732.3	873.7	873.7
													TOP3A	4109.6		PICH	1610.6	752	752
													BLM	4139		PICH	1308.7	450.1	450.1
													PICH	1732.3		TOP3A	3271.2
													TOP3A	4797.2		TOP3A	3365	0	0
													BLM	4782.9		TOP3A	3643.5	372.3	372.3
													PICH	1610.6		TOP3A	3827.9	556.7	556.7
													TOP3A	4581.1		TOP3A	4055.8	784.6	784.6
													BLM	4695.1		TOP3A	4109.6	838.4	838.4
													PICH	1308.7		TOP3A	4797.2	1526	1526
													TOP3A	3763		TOP3A	4581.1	1309.9	1309.9
													BLM	4174.1		TOP3A	3763	491.8	491.8

## Sheet: HeLa Analysis UFBs
	HeLa siCTRL											HeLa siTOP3A									HeLa siCTRL: Absolute values				HeLa siCTRL : Ratio			HeLa siTOP3A: Absolute values				HeLa siTOP3A: Ratio
	HeLa_siCTRL_gBLMC18-TOP3A-PICH-01.czi		Mean		Background correction			Values				HeLa_siTOP3A_gBLMC18-TOP3A-PICH-01.czi		Mean		Background correction			Values		BLM	PICH	TOP3A		BLM/PICH	TOP3A/PICH		BLM	PICH	TOP3A		BLM/PICH	TOP3A/PICH
	Background	PICH	855.8		BLM	5217.3	0					Background	PICH	745.3		BLM	4390.9
	Background	TOP3A	4717		BLM	6939.1	1721.8	1721.8				Background	TOP3A	4239.6		BLM	4156.9	-234	0		1721.8	281.4	1601.3		6.11869	5.69048		0	188.9	0		0	0
	Background	BLM	5217.3		BLM	6742	1524.7	1524.7				Background	BLM	4390.9		BLM	4322.6	-68.3	0		1524.7	272.7	1891.7		5.59113	6.93693		0	296.7	0		0	0
		PICH	1137.2		BLM	6044.4	827.1	827.1					PICH	934.2		BLM	4348.2	-42.7	0		827.1	173	863.6		4.78092	4.99191		0	293.5	0		0	0
		TOP3A	6318.3		BLM	6907.8	1690.5	1690.5					TOP3A	3431.8		BLM	4283.5	-107.4	0		1690.5	304.2	1035.9		5.5572	3.40533		0	170.4	0		0	0
		BLM	6939.1		BLM	6774.7	1557.4	1557.4					BLM	4156.9		BLM	4350.5	-40.4	0		1557.4	319.4	988.9		4.87602	3.09612		0	227.9	0		0	0
		PICH	1128.5		BLM	6931.3	1714	1714					PICH	1042		BLM	4589	198.1	198.1		1714	346.8	374.3		4.94233	1.0793		198.1	378.3	0		0.523658	0
		TOP3A	6608.7		BLM	7092.8	1875.5	1875.5					TOP3A	3364.4		PICH	745.3	0			1875.5	220.3	1772.6		8.51339	8.0463
		BLM	6742		PICH	855.8	0						BLM	4322.6		PICH	934.2	188.9	188.9									207	202.8	0		1.02071	0
		PICH	1028.8		PICH	1137.2	281.4	281.4					PICH	1038.8		PICH	1042	296.7	296.7		1428.1	262.7	1457.5		5.43624	5.54815		347.3	269.8	417.1		1.28725	1.54596
		TOP3A	5580.6		PICH	1128.5	272.7	272.7					TOP3A	3708.4		PICH	1038.8	293.5	293.5		1912.2	381.7	1576.2		5.00969	4.12942		404.1	315.4	190.6		1.28123	0.604312
		BLM	6044.4		PICH	1028.8	173	173					BLM	4348.2		PICH	915.7	170.4	170.4		2300	494	2779.5		4.65587	5.62652		403	245.6	280.5		1.64088	1.1421
		PICH	1160		PICH	1160	304.2	304.2					PICH	915.7		PICH	973.2	227.9	227.9		858.2	164.2	1627.4		5.22655	9.91108		333.2	248.9	0		1.33869	0
		TOP3A	5752.9		PICH	1175.2	319.4	319.4					TOP3A	3773.8		PICH	1123.6	378.3	378.3		1568.8	260.3	1655		6.02689	6.35805		628.4	335.1	88.5		1.87526	0.2641
		BLM	6907.8		PICH	1202.6	346.8	346.8					BLM	4283.5		TOP3A	4239.6	0			1434.4	237.7	1381.8		6.0345	5.81321		580.4	307.2	56.6		1.88932	0.184245
		PICH	1175.2		PICH	1076.1	220.3	220.3					PICH	973.2		TOP3A	3431.8	-807.8	0		1329.2	263	1159		5.05399	4.40684		279.2	207.5	306.6		1.34554	1.47759
		TOP3A	5705.9		TOP3A	4717	0						TOP3A	3651.5		TOP3A	3364.4	-875.2	0
		BLM	6774.7		TOP3A	6318.3	1601.3	1601.3					BLM	4350.5		TOP3A	3708.4	-531.2	0		1349.9	309.8	2177.7		4.35733	7.02937		36.9	121.7	0		0.303205	0
		PICH	1202.6		TOP3A	6608.7	1891.7	1891.7					PICH	1123.6		TOP3A	3773.8	-465.8	0		1303.6	273.9	2518.6		4.7594	9.19533		619	325	60		1.90462	0.184615
		TOP3A	5091.3		TOP3A	5580.6	863.6	863.6					TOP3A	3625.6		TOP3A	3651.5	-588.1	0		1029.1	271.5	2436.6		3.79042	8.97459		411.8	304.7	194.8		1.35149	0.639317
		BLM	6931.3		TOP3A	5752.9	1035.9	1035.9					BLM	4589		TOP3A	3625.6	-614	0		1667.2	279.1	2830.7		5.97349	10.1422		28.3	204.2	0		0.13859	0
		PICH	1076.1		TOP3A	5705.9	988.9	988.9													1527.7	269.4	3041.9		5.67075	11.2914		95.3	283.8	0		0.3358	0
		TOP3A	6489.6		TOP3A	5091.3	374.3	374.3				HeLa_siTOP3A_gBLMC18-TOP3A-PICH-02.czi									1814	231.1	3322.8		7.84942	14.3782		0	174.2	0		0	0
		BLM	7092.8		TOP3A	6489.6	1772.6	1772.6				Background	PICH	658.6		BLM	3299.1	0			2091.3	430.6	3607.3		4.85671	8.37738		439.6	305.5	193.4		1.43895	0.633061
												Background	TOP3A	2771		BLM	3506.1	207	207		1507.6	330.3	2751.5		4.56434	8.33031
	HeLa_siCTRL_gBLMC18-TOP3A-PICH-05.czi											Background	BLM	3299.1		BLM	3646.4	347.3	347.3		739	242	2038.8		3.05372	8.42479		205.1	198	124.7		1.03586	0.629798
	Background	PICH	894		BLM	4590.1	0						PICH	861.4		BLM	3703.2	404.1	404.1		1464.5	237.5	2725		6.16632	11.4737		453.3	320.6	433.3		1.41391	1.35153
	Background	TOP3A	4153.8		BLM	6018.2	1428.1	1428.1					TOP3A	2742.8		BLM	3702.1	403	403		1154.7	243.6	2088.8		4.74015	8.57471		86.8	299.7	0		0.289623	0
	Background	BLM	4590.1		BLM	6502.3	1912.2	1912.2					BLM	3506.1		BLM	3632.3	333.2	333.2		885.1	261.1	2198.9		3.38989	8.42168		170.2	424.9	0		0.400565	0
		PICH	1156.7		BLM	6890.1	2300	2300					PICH	928.4		BLM	3927.5	628.4	628.4		1837.4	304.7	3105.4		6.03019	10.1917		116.5	370.7	0		0.31427	0
		TOP3A	5611.3		BLM	5448.3	858.2	858.2					TOP3A	3188.1		BLM	3879.5	580.4	580.4									0	234	0		0	0
		BLM	6018.2		BLM	6158.9	1568.8	1568.8					BLM	3646.4		BLM	3578.3	279.2	279.2		1326.9	355.3	946.8		3.73459	2.66479		0	122.5	0		0	0
		PICH	1275.7		BLM	6024.5	1434.4	1434.4					PICH	974		PICH	658.6	0			1534.9	288.8	1263.1		5.31475	4.37361
		TOP3A	5730		BLM	5919.3	1329.2	1329.2					TOP3A	2961.6		PICH	861.4	202.8	202.8		1918.7	382.5	974		5.01621	2.54641		0	145.5	0		0	0
		BLM	6502.3		PICH	894	0						BLM	3703.2		PICH	928.4	269.8	269.8		1485.5	317.6	1014.1		4.67727	3.19301		0	317.6	0		0	0
		PICH	1388		PICH	1156.7	262.7	262.7					PICH	904.2		PICH	974	315.4	315.4		917.7	273.8	831.6		3.35172	3.03725		0	180	0		0	0
		TOP3A	6933.3		PICH	1275.7	381.7	381.7					TOP3A	3051.5		PICH	904.2	245.6	245.6		927.9	254.1	1070.6		3.65171	4.2133
		BLM	6890.1		PICH	1388	494	494					BLM	3702.1		PICH	907.5	248.9	248.9		2223.8	474.7	329.9		4.68464	0.694965		205.1	226.3	0		0.906319	0
		PICH	1058.2		PICH	1058.2	164.2	164.2					PICH	907.5		PICH	993.7	335.1	335.1		2539.4	604.2	1070.5		4.20291	1.77176		124.4	134.8	0		0.922849	0
		TOP3A	5781.2		PICH	1154.3	260.3	260.3					TOP3A	2747.2		PICH	965.8	307.2	307.2		2396.4	565.6	788.6		4.23692	1.39427		251.5	285.2	0		0.881837	0
		BLM	5448.3		PICH	1131.7	237.7	237.7					BLM	3632.3		PICH	866.1	207.5	207.5		1137.8	341.1	1399.8		3.33568	4.10378		271.1	272.6	3.7		0.994497	0.013573
		PICH	1154.3		PICH	1157	263	263					PICH	993.7		TOP3A	2771	0			1003.8	372.8	723.8		2.6926	1.94152		0	228.7	0		0	0
		TOP3A	5808.8		TOP3A	4153.8	0						TOP3A	2859.5		TOP3A	2742.8	-28.2	0									135.6	341.3	0		0.397304	0
		BLM	6158.9		TOP3A	5611.3	1457.5	1457.5					BLM	3927.5		TOP3A	3188.1	417.1	417.1		912.1	116.7	1456		7.81577	12.4764
		PICH	1131.7		TOP3A	5730	1576.2	1576.2					PICH	965.8		TOP3A	2961.6	190.6	190.6		1761.4	254.6	1803.8		6.9183	7.08484		64.7	359.1	0		0.180173	0
		TOP3A	5535.6		TOP3A	6933.3	2779.5	2779.5					TOP3A	2827.6		TOP3A	3051.5	280.5	280.5		1011.5	217	1211.1		4.66129	5.58111		147.6	428.8	0		0.344216	0
		BLM	6024.5		TOP3A	5781.2	1627.4	1627.4					BLM	3879.5		TOP3A	2747.2	-23.8	0									167.3	404.8	52.1		0.413291	0.128706
		PICH	1157		TOP3A	5808.8	1655	1655					PICH	866.1		TOP3A	2859.5	88.5	88.5									31.4	289.7	0		0.108388	0
		TOP3A	5312.8		TOP3A	5535.6	1381.8	1381.8					TOP3A	3077.6		TOP3A	2827.6	56.6	56.6		1091.8	196.2	10		5.56473	0.0509684		336.3	356.2	0		0.944133	0
		BLM	5919.3		TOP3A	5312.8	1159	1159					BLM	3578.3		TOP3A	3077.6	306.6	306.6		1208.2	247.8	756.2		4.87571	3.05165		231.6	308.8	0		0.75	0
																					1155.6	237.5	757		4.86568	3.18737		58.2	297.7	0		0.195499	0
	HeLa_siCTRL_gBLMC18-TOP3A-PICH-07.czi											HeLa_siTOP3A_gBLMC18-TOP3A-PICH-04.czi									1180.9	198.6	1205.9		5.94612	6.072		157.3	353	0		0.445609	0
	Background	PICH	851.3		BLM	4092.4	0					Background	PICH	831.8		BLM	4278.8	0			1041.9	182.7	1318.6		5.70279	7.2173
	Background	TOP3A	4084		BLM	5442.3	1349.9	1349.9				Background	TOP3A	4624		BLM	4315.7	36.9	36.9		1164.6	243.3	748.3		4.78668	3.07563		0	211.8	107		0	0.505194
	Background	BLM	4092.4		BLM	5396	1303.6	1303.6				Background	BLM	4278.8		BLM	4897.8	619	619		1317.1	247	857.2		5.33239	3.47045		0	417.7	229.8		0	0.550156
		PICH	1161.1		BLM	5121.5	1029.1	1029.1					PICH	953.5		BLM	4690.6	411.8	411.8									0	303.2	175.3		0	0.578166
		TOP3A	6261.7		BLM	5759.6	1667.2	1667.2					TOP3A	4595.2		BLM	4307.1	28.3	28.3		917.5	513.1	2008.8		1.78815	3.91503		41.8	337.3	0		0.123925	0
		BLM	5442.3		BLM	5620.1	1527.7	1527.7					BLM	4315.7		BLM	4374.1	95.3	95.3		810.1	483.6	945.3		1.67514	1.95471		84.3	335.7	0		0.251117	0
		PICH	1125.2		BLM	5906.4	1814	1814					PICH	1156.8		BLM	4203.3	-75.5	0		1874	775.9	1917.4		2.41526	2.47119		0	241.8	0		0	0
		TOP3A	6602.6		BLM	6183.7	2091.3	2091.3					TOP3A	4684		BLM	4718.4	439.6	439.6		1526.7	577.1	1179.3		2.64547	2.04349		15	420	227.8		0.0357143	0.542381
		BLM	5396		BLM	5600	1507.6	1507.6					BLM	4897.8		PICH	831.8	0			1410.6	515	2904.3		2.73903	5.63942
		PICH	1122.8		BLM	4831.4	739	739					PICH	1136.5		PICH	953.5	121.7	121.7		1116.7	381.6	1994.5		2.92636	5.22668		121.7	159.6	0		0.762531	0
		TOP3A	6520.6		BLM	5556.9	1464.5	1464.5					TOP3A	4818.8		PICH	1156.8	325	325		1257.2	465.3	2552.2		2.70191	5.48506		14	210.9	0		0.0663822	0
		BLM	5121.5		BLM	5247.1	1154.7	1154.7					BLM	4690.6		PICH	1136.5	304.7	304.7		1434.1	456.4	2023.1		3.1422	4.43273		176.6	296.4	0		0.595816	0
		PICH	1130.4		BLM	4977.5	885.1	885.1					PICH	1036		PICH	1036	204.2	204.2		1098.3	521.9	1390.2		2.10443	2.66373		166.7	311.8	0		0.534638	0
		TOP3A	6914.7		BLM	5929.8	1837.4	1837.4					TOP3A	4035.4		PICH	1115.6	283.8	283.8		904.9	373.7	2179.9		2.42146	5.83329		117.9	301.1	120.9		0.391564	0.401528
		BLM	5759.6		PICH	851.3	0						BLM	4307.1		PICH	1006	174.2	174.2		769.2	236.7	1688.2		3.24968	7.13223		114.8	298	0		0.385235	0
		PICH	1120.7		PICH	1161.1	309.8	309.8					PICH	1115.6		PICH	1137.3	305.5	305.5
		TOP3A	7125.9		PICH	1125.2	273.9	273.9					TOP3A	4109.6		TOP3A	4624	0			1069.1	137.9	1668.3		7.75272	12.0979		0	511.3	0		0	0
		BLM	5620.1		PICH	1122.8	271.5	271.5					BLM	4374.1		TOP3A	4595.2	-28.8	0		816.5	161.6	1521.4		5.0526	9.4146		0	365.1	11.3		0	0.0309504
		PICH	1082.4		PICH	1130.4	279.1	279.1					PICH	1006		TOP3A	4684	60	60		666	138.8	402.6		4.79827	2.90058		111.9	550.3	240		0.203344	0.436126
		TOP3A	7406.8		PICH	1120.7	269.4	269.4					TOP3A	4473.9		TOP3A	4818.8	194.8	194.8		1261	162	1982.2		7.78395	12.2358		143.4	613	0		0.233931	0
		BLM	5906.4		PICH	1082.4	231.1	231.1					BLM	4203.3		TOP3A	4035.4	-588.6	0		425.9	28.6	2091.2		14.8916	73.1189		200.1	303.9	187.7		0.65844	0.617637
		PICH	1281.9		PICH	1281.9	430.6	430.6					PICH	1137.3		TOP3A	4109.6	-514.4	0
		TOP3A	7691.3		PICH	1181.6	330.3	330.3					TOP3A	4817.4		TOP3A	4473.9	-150.1	0		938.2	240.7	1268.1		3.8978	5.26838		0	227.8	0		0	0
		BLM	6183.7		PICH	1093.3	242	242					BLM	4718.4		TOP3A	4817.4	193.4	193.4		1132.2	300.2	838.4		3.77149	2.7928		0	246.2	0		0	0
		PICH	1181.6		PICH	1088.8	237.5	237.5													1863.7	462.2	756.8		4.03224	1.63739		550.6	441.6	0		1.24683	0
		TOP3A	6835.5		PICH	1094.9	243.6	243.6				HeLa_siTOP3A_gBLMC18-TOP3A-PICH-05.czi									2172.8	669.7	1494.6		3.24444	2.23175		0	247.2	0		0	0
		BLM	5600		PICH	1112.4	261.1	261.1				Background	PICH	781.7		BLM	3800.8	0			1613.4	558.8	1448.1		2.88726	2.59145		0	235.4	0		0	0
		PICH	1093.3		PICH	1156	304.7	304.7				Background	TOP3A	4095.4		BLM	4005.9	205.1	205.1		1368.7	338.8	1922.2		4.03985	5.67355		0	187.5	0		0	0
		TOP3A	6122.8		TOP3A	4084	0					Background	BLM	3800.8		BLM	4254.1	453.3	453.3		1282	413	2138.9		3.10412	5.17893
		BLM	4831.4		TOP3A	6261.7	2177.7	2177.7					PICH	979.7		BLM	3887.6	86.8	86.8		1477.9	423.5	2521.7		3.48973	5.95443		0	165.6	0		0	0
		PICH	1088.8		TOP3A	6602.6	2518.6	2518.6					TOP3A	4220.1		BLM	3971	170.2	170.2		1918.1	631.7	1585.4		3.03641	2.50974		0	135.4	0		0	0
		TOP3A	6809		TOP3A	6520.6	2436.6	2436.6					BLM	4005.9		BLM	3917.3	116.5	116.5		1064.1	266.4	1227		3.99437	4.60586		249.7	346.7	0		0.720219	0
		BLM	5556.9		TOP3A	6914.7	2830.7	2830.7					PICH	1102.3		BLM	3745.7	-55.1	0		544.7	184.5	366.2		2.9523	1.98482		285.2	343.4	0		0.830518	0
		PICH	1094.9		TOP3A	7125.9	3041.9	3041.9					TOP3A	4528.7		BLM	3638	-162.8	0									0	285.2	0		0	0
		TOP3A	6172.8		TOP3A	7406.8	3322.8	3322.8					BLM	4254.1		PICH	781.7	0			1635	326.7	1122.4		5.00459	3.43557		0	313	0		0	0
		BLM	5247.1		TOP3A	7691.3	3607.3	3607.3					PICH	1081.4		PICH	979.7	198	198		276.1	72.1	800.2		3.8294	11.0985		0	301.7	0		0	0
		PICH	1112.4		TOP3A	6835.5	2751.5	2751.5					TOP3A	3978.5		PICH	1102.3	320.6	320.6		1610	337.6	1595.2		4.76896	4.72512
		TOP3A	6282.9		TOP3A	6122.8	2038.8	2038.8					BLM	3887.6		PICH	1081.4	299.7	299.7		892.8	251.6	3011.4		3.54849	11.969
		BLM	4977.5		TOP3A	6809	2725	2725					PICH	1206.6		PICH	1206.6	424.9	424.9		1321.7	331	1967.7		3.99305	5.94471
		PICH	1156		TOP3A	6172.8	2088.8	2088.8					TOP3A	3852.3		PICH	1152.4	370.7	370.7		1585.4	430.4	1608.7		3.68355	3.73769
		TOP3A	7189.4		TOP3A	6282.9	2198.9	2198.9					BLM	3971		PICH	1015.7	234	234		1427.5	314.9	2792.3		4.53319	8.86726
		BLM	5929.8		TOP3A	7189.4	3105.4	3105.4					PICH	1152.4		PICH	904.2	122.5	122.5		951.3	274.7	2418.1		3.46305	8.80269
													TOP3A	3842.5		TOP3A	4095.4	0			839.5	157	1581.3		5.34713	10.072
	HeLa_siCTRL_gBLMC18-TOP3A-PICH-08.czi												BLM	3917.3		TOP3A	4220.1	124.7	124.7		1320.2	428.5	723.3		3.08098	1.68798
	Background	PICH	778.3		BLM	4077	0						PICH	1015.7		TOP3A	4528.7	433.3	433.3		1877.9	409.7	1459.2		4.5836	3.56163
	Background	TOP3A	4764.4		BLM	5403.9	1326.9	1326.9					TOP3A	3873.1		TOP3A	3978.5	-116.9	0		981.6	304.8	1534		3.22047	5.03281
	Background	BLM	4077		BLM	5611.9	1534.9	1534.9					BLM	3745.7		TOP3A	3852.3	-243.1	0
		PICH	1133.6		BLM	5995.7	1918.7	1918.7					PICH	904.2		TOP3A	3842.5	-252.9	0		1334.6	303.8	1471.8		4.39302	4.84463
		TOP3A	5711.2		BLM	5562.5	1485.5	1485.5					TOP3A	3737.6		TOP3A	3873.1	-222.3	0		1767.6	395.1	1668.4		4.4738	4.22273
		BLM	5403.9		BLM	4994.7	917.7	917.7					BLM	3638		TOP3A	3737.6	-357.8	0		1802.6	383.3	1921		4.70284	5.01174
		PICH	1067.1		BLM	5004.9	927.9	927.9													1428.8	336.1	1520.5		4.25112	4.52395
		TOP3A	6027.5		BLM	6300.8	2223.8	2223.8				HeLa_siTOP3A_gBLMC18-TOP3A-PICH-06.czi									1423.8	300.1	1169.5		4.74442	3.89703
		BLM	5611.9		BLM	6616.4	2539.4	2539.4				Background	PICH	761.1		BLM	3552.6	0			1130.5	259.8	1218.3		4.35142	4.68938
		PICH	1160.8		BLM	6473.4	2396.4	2396.4				Background	TOP3A	3831.8		BLM	3124.7	-427.9	0		986.4	243.6	967.4		4.04926	3.97126
		TOP3A	5738.4		BLM	5214.8	1137.8	1137.8				Background	BLM	3552.6		BLM	3523.4	-29.2	0		1154.4	341.8	1020.5		3.37741	2.98566
		BLM	5995.7		BLM	5080.8	1003.8	1003.8					PICH	906.6		BLM	3214.9	-337.7	0
		PICH	1095.9		PICH	778.3	0						TOP3A	3163.9		PICH	761.1	0			657.6	124.9	1274.1		5.26501	10.201
		TOP3A	5778.5		PICH	1133.6	355.3	355.3					BLM	3124.7		PICH	906.6	145.5	145.5		1252.9	218.4	1477.2		5.73672	6.76374
		BLM	5562.5		PICH	1067.1	288.8	288.8					PICH	1078.7		PICH	1078.7	317.6	317.6		1913.1	266.3	2786.3		7.184	10.463
		PICH	1052.1		PICH	1160.8	382.5	382.5					TOP3A	3390.2		PICH	941.1	180	180		2032	402.6	3577.2		5.04719	8.88525
		TOP3A	5596		PICH	1095.9	317.6	317.6					BLM	3523.4		TOP3A	3831.8	0			1819.4	255.4	2529.1		7.12373	9.90251
		BLM	4994.7		PICH	1052.1	273.8	273.8					PICH	941.1		TOP3A	3163.9	-667.9	0		1310.2	283.1	2176.6		4.62805	7.68845
		PICH	1032.4		PICH	1032.4	254.1	254.1					TOP3A	3263.2		TOP3A	3390.2	-441.6	0		1889	359.5	2520.3		5.25452	7.01057
		TOP3A	5835		PICH	1253	474.7	474.7					BLM	3214.9		TOP3A	3263.2	-568.6	0		1933.2	236.6	1775.4		8.17075	7.5038
		BLM	5004.9		PICH	1382.5	604.2	604.2													1663.1	189.5	1883.8		8.77625	9.9409
		PICH	1253		PICH	1343.9	565.6	565.6				HeLa_siTOP3A_gBLMC18-TOP3A-PICH-08.czi									645.1	173.6	880		3.71601	5.06912
		TOP3A	5094.3		PICH	1119.4	341.1	341.1				Background	PICH	791.2		BLM	3749.5	0			1194.1	221.3	2016.7		5.39584	9.11297
		BLM	6300.8		PICH	1151.1	372.8	372.8				Background	TOP3A	3794.5		BLM	3954.6	205.1	205.1
		PICH	1382.5		TOP3A	4764.4	0					Background	BLM	3749.5		BLM	3873.9	124.4	124.4
		TOP3A	5834.9		TOP3A	5711.2	946.8	946.8					PICH	1017.5		BLM	4001	251.5	251.5
		BLM	6616.4		TOP3A	6027.5	1263.1	1263.1					TOP3A	3412.7		BLM	4020.6	271.1	271.1
		PICH	1343.9		TOP3A	5738.4	974	974					BLM	3954.6		BLM	3688.9	-60.6	0
		TOP3A	5553		TOP3A	5778.5	1014.1	1014.1					PICH	926		BLM	3885.1	135.6	135.6
		BLM	6473.4		TOP3A	5596	831.6	831.6					TOP3A	3335.9		PICH	791.2	0
		PICH	1119.4		TOP3A	5835	1070.6	1070.6					BLM	3873.9		PICH	1017.5	226.3	226.3
		TOP3A	6164.2		TOP3A	5094.3	329.9	329.9					PICH	1076.4		PICH	926	134.8	134.8
		BLM	5214.8		TOP3A	5834.9	1070.5	1070.5					TOP3A	3432.4		PICH	1076.4	285.2	285.2
		PICH	1151.1		TOP3A	5553	788.6	788.6					BLM	4001		PICH	1063.8	272.6	272.6
		TOP3A	5488.2		TOP3A	6164.2	1399.8	1399.8					PICH	1063.8		PICH	1019.9	228.7	228.7
		BLM	5080.8		TOP3A	5488.2	723.8	723.8					TOP3A	3798.2		PICH	1132.5	341.3	341.3
													BLM	4020.6		TOP3A	3794.5	0
	HeLa_siCTRL_gBLMC18-TOP3A-PICH-09.czi												PICH	1019.9		TOP3A	3412.7	-381.8	0
	Background	PICH	832.4		BLM	3915.1	0						TOP3A	3251.8		TOP3A	3335.9	-458.6	0
	Background	TOP3A	4604.6		BLM	4827.2	912.1	912.1					BLM	3688.9		TOP3A	3432.4	-362.1	0
	Background	BLM	3915.1		BLM	5676.5	1761.4	1761.4					PICH	1132.5		TOP3A	3798.2	3.7	3.7
		PICH	949.1		BLM	4926.6	1011.5	1011.5					TOP3A	3271.9		TOP3A	3251.8	-542.7	0
		TOP3A	6460.6		PICH	832.4	0						BLM	3885.1		TOP3A	3271.9	-522.6	0
		BLM	4827.2		PICH	949.1	116.7	116.7
		PICH	1087		PICH	1087	254.6	254.6				HeLa_siTOP3A_gBLMC18-TOP3A-PICH-10.czi
		TOP3A	6408.4		PICH	1049.4	217	217				Background	PICH	737.4		BLM	4027.1	0
		BLM	5676.5		TOP3A	4604.6	0					Background	TOP3A	3557.8		BLM	4091.8	64.7	64.7
		PICH	1049.4		TOP3A	6060.6	1456	1456				Background	BLM	4027.1		BLM	4174.7	147.6	147.6
		TOP3A	5815.7		TOP3A	6408.4	1803.8	1803.8					PICH	1096.5		BLM	4194.4	167.3	167.3
		BLM	4926.6		TOP3A	5815.7	1211.1	1211.1					TOP3A	3361.9		BLM	4058.5	31.4	31.4
													BLM	4091.8		BLM	4363.4	336.3	336.3
	HeLa_siCTRL_gBLMC18-TOP3A-PICH-10.czi												PICH	1166.2		BLM	4258.7	231.6	231.6
	Background	PICH	853.2		BLM	4452.8	0						TOP3A	3344		BLM	4085.3	58.2	58.2
	Background	TOP3A	4973.4										BLM	4174.7		BLM	4184.4	157.3	157.3
	Background	BLM	4452.8		BLM	5544.6	1091.8	1091.8					PICH	1142.2		PICH	737.4	0
		PICH	963.6		BLM	5661	1208.2	1208.2					TOP3A	3609.9		PICH	1096.5	359.1	359.1
		TOP3A	6157.8		BLM	5608.4	1155.6	1155.6					BLM	4194.4		PICH	1166.2	428.8	428.8
		BLM	5682		BLM	5633.7	1180.9	1180.9					PICH	1027.1		PICH	1142.2	404.8	404.8
		PICH	1049.4		BLM	5494.7	1041.9	1041.9					TOP3A	3136.6		PICH	1027.1	289.7	289.7
		TOP3A	4983.4		BLM	5617.4	1164.6	1164.6					BLM	4058.5		PICH	1093.6	356.2	356.2
		BLM	5544.6		BLM	5769.9	1317.1	1317.1					PICH	1093.6		PICH	1046.2	308.8	308.8
		PICH	1101		PICH	853.2	0						TOP3A	3510.8		PICH	1035.1	297.7	297.7
		TOP3A	5729.6										BLM	4363.4		PICH	1090.4	353	353
		BLM	5661		PICH	1049.4	196.2	196.2					PICH	1046.2		TOP3A	3557.8	0
		PICH	1090.7		PICH	1101	247.8	247.8					TOP3A	3274.4		TOP3A	3361.9	-195.9	0
		TOP3A	5730.4		PICH	1090.7	237.5	237.5					BLM	4258.7		TOP3A	3344	-213.8	0
		BLM	5608.4		PICH	1051.8	198.6	198.6					PICH	1035.1		TOP3A	3609.9	52.1	52.1
		PICH	1051.8		PICH	1035.9	182.7	182.7					TOP3A	3364		TOP3A	3136.6	-421.2	0
		TOP3A	6179.3		PICH	1096.5	243.3	243.3					BLM	4085.3		TOP3A	3510.8	-47	0
		BLM	5633.7		PICH	1100.2	247	247					PICH	1090.4		TOP3A	3274.4	-283.4	0
		PICH	1035.9		TOP3A	4973.4	0						TOP3A	3240.7		TOP3A	3364	-193.8	0
		TOP3A	6292										BLM	4184.4		TOP3A	3240.7	-317.1	0
		BLM	5494.7		TOP3A	4983.4	10	10
		PICH	1096.5		TOP3A	5729.6	756.2	756.2				HeLa_siTOP3A_gBLMC18-TOP3A-PICH-11.czi
		TOP3A	5721.7		TOP3A	5730.4	757	757				Background	PICH	775.8		BLM	3711.2	0
		BLM	5617.4		TOP3A	6179.3	1205.9	1205.9				Background	TOP3A	2926.4		BLM	3634.4	-76.8	0
		PICH	1100.2		TOP3A	6292	1318.6	1318.6				Background	BLM	3711.2		BLM	3703.6	-7.6	0
		TOP3A	5830.6		TOP3A	5721.7	748.3	748.3					PICH	987.6		BLM	3679.3	-31.9	0
		BLM	5769.9		TOP3A	5830.6	857.2	857.2					TOP3A	3033.4		BLM	3753	41.8	41.8
													BLM	3634.4		BLM	3795.5	84.3	84.3
	HeLa_siCTRL_gBLMC18-TOP3A-PICH-11.czi												PICH	1193.5		BLM	3447.7	-263.5	0
	Background	PICH	853.4		BLM	3678.3	0						TOP3A	3156.2		BLM	3726.2	15	15
	Background	TOP3A	3274.6		BLM	4595.8	917.5	917.5					BLM	3703.6		PICH	775.8	0
	Background	BLM	3678.3		BLM	4488.4	810.1	810.1					PICH	1079		PICH	987.6	211.8	211.8
		PICH	1366.5		BLM	5552.3	1874	1874					TOP3A	3101.7		PICH	1193.5	417.7	417.7
		TOP3A	5283.4		BLM	5205	1526.7	1526.7					BLM	3679.3		PICH	1079	303.2	303.2
		BLM	4595.8		BLM	5088.9	1410.6	1410.6					PICH	1113.1		PICH	1113.1	337.3	337.3
		PICH	1337		BLM	4795	1116.7	1116.7					TOP3A	2840.8		PICH	1111.5	335.7	335.7
		TOP3A	4219.9		BLM	4935.5	1257.2	1257.2					BLM	3753		PICH	1017.6	241.8	241.8
		BLM	4488.4		BLM	5112.4	1434.1	1434.1					PICH	1111.5		PICH	1195.8	420	420
		PICH	1629.3		BLM	4776.6	1098.3	1098.3					TOP3A	2746.6		TOP3A	2926.4	0
		TOP3A	5192		BLM	4583.2	904.9	904.9					BLM	3795.5		TOP3A	3033.4	107	107
		BLM	5552.3		BLM	4447.5	769.2	769.2					PICH	1017.6		TOP3A	3156.2	229.8	229.8
		PICH	1430.5		PICH	853.4	0						TOP3A	2732.3		TOP3A	3101.7	175.3	175.3
		TOP3A	4453.9		PICH	1366.5	513.1	513.1					BLM	3447.7		TOP3A	2840.8	-85.6	0
		BLM	5205		PICH	1337	483.6	483.6					PICH	1195.8		TOP3A	2746.6	-179.8	0
		PICH	1368.4		PICH	1629.3	775.9	775.9					TOP3A	3154.2		TOP3A	2732.3	-194.1	0
		TOP3A	6178.9		PICH	1430.5	577.1	577.1					BLM	3726.2		TOP3A	3154.2	227.8	227.8
		BLM	5088.9		PICH	1368.4	515	515
		PICH	1235		PICH	1235	381.6	381.6				HeLa_siTOP3A_gBLMC18-TOP3A-PICH-12.czi
		TOP3A	5269.1		PICH	1318.7	465.3	465.3				Background	PICH	676.6		BLM	3064.5	0
		BLM	4795		PICH	1309.8	456.4	456.4				Background	TOP3A	3406.4		BLM	3186.2	121.7	121.7
		PICH	1318.7		PICH	1375.3	521.9	521.9				Background	BLM	3064.5		BLM	3078.5	14	14
		TOP3A	5826.8		PICH	1227.1	373.7	373.7					PICH	836.2		BLM	3241.1	176.6	176.6
		BLM	4935.5		PICH	1090.1	236.7	236.7					TOP3A	3132.3		BLM	3231.2	166.7	166.7
		PICH	1309.8		TOP3A	3274.6	0						BLM	3186.2		BLM	3182.4	117.9	117.9
		TOP3A	5297.7		TOP3A	5283.4	2008.8	2008.8					PICH	887.5		BLM	3179.3	114.8	114.8
		BLM	5112.4		TOP3A	4219.9	945.3	945.3					TOP3A	3276.2		PICH	676.6	0
		PICH	1375.3		TOP3A	5192	1917.4	1917.4					BLM	3078.5		PICH	836.2	159.6	159.6
		TOP3A	4664.8		TOP3A	4453.9	1179.3	1179.3					PICH	973		PICH	887.5	210.9	210.9
		BLM	4776.6		TOP3A	6178.9	2904.3	2904.3					TOP3A	3000.2		PICH	973	296.4	296.4
		PICH	1227.1		TOP3A	5269.1	1994.5	1994.5					BLM	3241.1		PICH	988.4	311.8	311.8
		TOP3A	5454.5		TOP3A	5826.8	2552.2	2552.2					PICH	988.4		PICH	977.7	301.1	301.1
		BLM	4583.2		TOP3A	5297.7	2023.1	2023.1					TOP3A	3381.4		PICH	974.6	298	298
		PICH	1090.1		TOP3A	4664.8	1390.2	1390.2					BLM	3231.2		TOP3A	3406.4	0
		TOP3A	4962.8		TOP3A	5454.5	2179.9	2179.9					PICH	977.7		TOP3A	3132.3	-274.1	0
		BLM	4447.5		TOP3A	4962.8	1688.2	1688.2					TOP3A	3527.3		TOP3A	3276.2	-130.2	0
													BLM	3182.4		TOP3A	3000.2	-406.2	0
	HeLa_siCTRL_gBLMC18-TOP3A-PICH-12.czi												PICH	974.6		TOP3A	3381.4	-25	0
	Background	PICH	818.6		BLM	3560.5	0						TOP3A	3294.9		TOP3A	3527.3	120.9	120.9
	Background	TOP3A	4283.7		BLM	4629.6	1069.1	1069.1					BLM	3179.3		TOP3A	3294.9	-111.5	0
	Background	BLM	3560.5		BLM	4377	816.5	816.5
		PICH	956.5		BLM	4226.5	666	666				HeLa_siTOP3A_gBLMC18-TOP3A-PICH-13.czi
		TOP3A	5952		BLM	4821.5	1261	1261				Background	PICH	705.6		BLM	3558.9	0
		BLM	4629.6									Background	TOP3A	2717.1		BLM	3502.8	-56.1	0
		PICH	980.2		PICH	818.6	0					Background	BLM	3558.9		BLM	3441.2	-117.7	0
		TOP3A	5805.1		PICH	956.5	137.9	137.9					PICH	1216.9		BLM	3670.8	111.9	111.9
		BLM	4377		PICH	980.2	161.6	161.6					TOP3A	2545.3		BLM	3702.3	143.4	143.4
		PICH	957.4		PICH	957.4	138.8	138.8					BLM	3502.8		BLM	3759	200.1	200.1
		TOP3A	4686.3		PICH	980.6	162	162					PICH	1070.7		PICH	705.6	0
		BLM	4226.5										TOP3A	2728.4		PICH	1216.9	511.3	511.3
		PICH	980.6		TOP3A	4283.7	0						BLM	3441.2		PICH	1070.7	365.1	365.1
		TOP3A	6265.9		TOP3A	5952	1668.3	1668.3					PICH	1255.9		PICH	1255.9	550.3	550.3
		BLM	4821.5		TOP3A	5805.1	1521.4	1521.4					TOP3A	2957.1		PICH	1318.6	613	613
					TOP3A	4686.3	402.6	402.6					BLM	3670.8		PICH	1009.5	303.9	303.9
					TOP3A	6265.9	1982.2	1982.2					PICH	1318.6		TOP3A	2717.1	0
													TOP3A	2589.2		TOP3A	2545.3	-171.8	0
													BLM	3702.3		TOP3A	2728.4	11.3	11.3
	HeLa_siCTRL_gBLMC18-TOP3A-PICH-13.czi												PICH	1009.5		TOP3A	2957.1	240	240
	Background	PICH	875.9		BLM	3251.2	0						TOP3A	2904.8		TOP3A	2589.2	-127.9	0
	Background	TOP3A	3147.8		BLM	4189.4	938.2	938.2					BLM	3759		TOP3A	2904.8	187.7	187.7
	Background	BLM	3251.2		BLM	4383.4	1132.2	1132.2
		PICH	1116.6		BLM	5114.9	1863.7	1863.7				HeLa_siTOP3A_gBLMC18-TOP3A-PICH-14.czi
		TOP3A	4415.9		BLM	5424	2172.8	2172.8				Background	PICH	731.9		BLM	3901.1	0
		BLM	4189.4		BLM	4864.6	1613.4	1613.4				Background	TOP3A	3501		BLM	3493.2	-407.9	0
		PICH	1176.1		BLM	4619.9	1368.7	1368.7				Background	BLM	3901.1		BLM	3712.8	-188.3	0
		TOP3A	3986.2		BLM	4533.2	1282	1282					PICH	959.7		BLM	4451.7	550.6	550.6
		BLM	4383.4		BLM	4729.1	1477.9	1477.9					TOP3A	2833.3		BLM	3848.1	-53	0
		PICH	1338.1		BLM	5169.3	1918.1	1918.1					BLM	3493.2		BLM	3808.3	-92.8	0
		TOP3A	3904.6		BLM	4315.3	1064.1	1064.1					PICH	978.1		BLM	3527.1	-374	0
		BLM	5114.9		BLM	3795.9	544.7	544.7					TOP3A	2985		PICH	731.9	0
		PICH	1545.6		PICH	875.9	0						BLM	3712.8		PICH	959.7	227.8	227.8
		TOP3A	4642.4		PICH	1116.6	240.7	240.7					PICH	1173.5		PICH	978.1	246.2	246.2
		BLM	5424		PICH	1176.1	300.2	300.2					TOP3A	2721.3		PICH	1173.5	441.6	441.6
		PICH	1434.7		PICH	1338.1	462.2	462.2					BLM	4451.7		PICH	979.1	247.2	247.2
		TOP3A	4595.9		PICH	1545.6	669.7	669.7					PICH	979.1		PICH	967.3	235.4	235.4
		BLM	4864.6		PICH	1434.7	558.8	558.8					TOP3A	2698.5		PICH	919.4	187.5	187.5
		PICH	1214.7		PICH	1214.7	338.8	338.8					BLM	3848.1		TOP3A	3501	0
		TOP3A	5070		PICH	1288.9	413	413					PICH	967.3		TOP3A	2833.3	-667.7	0
		BLM	4619.9		PICH	1299.4	423.5	423.5					TOP3A	2996.2		TOP3A	2985	-516	0
		PICH	1288.9		PICH	1507.6	631.7	631.7					BLM	3808.3		TOP3A	2721.3	-779.7	0
		TOP3A	5286.7		PICH	1142.3	266.4	266.4					PICH	919.4		TOP3A	2698.5	-802.5	0
		BLM	4533.2		PICH	1060.4	184.5	184.5					TOP3A	2895.5		TOP3A	2996.2	-504.8	0
		PICH	1299.4		TOP3A	3147.8	0						BLM	3527.1		TOP3A	2895.5	-605.5	0
		TOP3A	5669.5		TOP3A	4415.9	1268.1	1268.1
		BLM	4729.1		TOP3A	3986.2	838.4	838.4				HeLa_siTOP3A_gBLMC18-TOP3A-PICH-15.czi
		PICH	1507.6		TOP3A	3904.6	756.8	756.8				Background	PICH	734.8		BLM	3968.9	0
		TOP3A	4733.2		TOP3A	4642.4	1494.6	1494.6				Background	TOP3A	4339.1		BLM	3819.1	-149.8	0
		BLM	5169.3		TOP3A	4595.9	1448.1	1448.1				Background	BLM	3968.9		BLM	3900.6	-68.3	0
		PICH	1142.3		TOP3A	5070	1922.2	1922.2					PICH	900.4		BLM	4218.6	249.7	249.7
		TOP3A	4374.8		TOP3A	5286.7	2138.9	2138.9					TOP3A	3508.9		BLM	4254.1	285.2	285.2
		BLM	4315.3		TOP3A	5669.5	2521.7	2521.7					BLM	3819.1		BLM	3854.3	-114.6	0
		PICH	1060.4		TOP3A	4733.2	1585.4	1585.4					PICH	870.2		BLM	3807.6	-161.3	0
		TOP3A	3514		TOP3A	4374.8	1227	1227					TOP3A	3745.2		BLM	3574.6	-394.3	0
		BLM	3795.9		TOP3A	3514	366.2	366.2					BLM	3900.6		PICH	734.8	0
													PICH	1081.5		PICH	900.4	165.6	165.6
	HeLa_siCTRL_gBLMC18-TOP3A-PICH-14.czi												TOP3A	4024.9		PICH	870.2	135.4	135.4
	Background	PICH	846.2		BLM	4127.6	0						BLM	4218.6		PICH	1081.5	346.7	346.7
	Background	TOP3A	3857.3		BLM	5762.6	1635	1635					PICH	1078.2		PICH	1078.2	343.4	343.4
	Background	BLM	4127.6		BLM	4403.7	276.1	276.1					TOP3A	3956.8		PICH	1020	285.2	285.2
		PICH	1172.9		BLM	5737.6	1610	1610					BLM	4254.1		PICH	1047.8	313	313
		TOP3A	4979.7		BLM	5020.4	892.8	892.8					PICH	1020		PICH	1036.5	301.7	301.7
		BLM	5762.6		BLM	5449.3	1321.7	1321.7					TOP3A	3723.3		TOP3A	4339.1	0
		PICH	918.3		BLM	5713	1585.4	1585.4					BLM	3854.3		TOP3A	3508.9	-830.2	0
		TOP3A	4657.5		BLM	5555.1	1427.5	1427.5					PICH	1047.8		TOP3A	3745.2	-593.9	0
		BLM	4403.7		BLM	5078.9	951.3	951.3					TOP3A	3491.4		TOP3A	4024.9	-314.2	0
		PICH	1183.8		BLM	4967.1	839.5	839.5					BLM	3807.6		TOP3A	3956.8	-382.3	0
		TOP3A	5452.5		BLM	5447.8	1320.2	1320.2					PICH	1036.5		TOP3A	3723.3	-615.8	0
		BLM	5737.6		BLM	6005.5	1877.9	1877.9					TOP3A	3314.9		TOP3A	3491.4	-847.7	0
		PICH	1097.8		BLM	5109.2	981.6	981.6					BLM	3574.6		TOP3A	3314.9	-1024.2	0
		TOP3A	6868.7		PICH	846.2	0
		BLM	5020.4		PICH	1172.9	326.7	326.7
		PICH	1177.2		PICH	918.3	72.1	72.1
		TOP3A	5825		PICH	1183.8	337.6	337.6
		BLM	5449.3		PICH	1097.8	251.6	251.6
		PICH	1276.6		PICH	1177.2	331	331
		TOP3A	5466		PICH	1276.6	430.4	430.4
		BLM	5713		PICH	1161.1	314.9	314.9
		PICH	1161.1		PICH	1120.9	274.7	274.7
		TOP3A	6649.6		PICH	1003.2	157	157
		BLM	5555.1		PICH	1274.7	428.5	428.5
		PICH	1120.9		PICH	1255.9	409.7	409.7
		TOP3A	6275.4		PICH	1151	304.8	304.8
		BLM	5078.9		TOP3A	3857.3	0
		PICH	1003.2		TOP3A	4979.7	1122.4	1122.4
		TOP3A	5438.6		TOP3A	4657.5	800.2	800.2
		BLM	4967.1		TOP3A	5452.5	1595.2	1595.2
		PICH	1274.7		TOP3A	6868.7	3011.4	3011.4
		TOP3A	4580.6		TOP3A	5825	1967.7	1967.7
		BLM	5447.8		TOP3A	5466	1608.7	1608.7
		PICH	1255.9		TOP3A	6649.6	2792.3	2792.3
		TOP3A	5316.5		TOP3A	6275.4	2418.1	2418.1
		BLM	6005.5		TOP3A	5438.6	1581.3	1581.3
		PICH	1151		TOP3A	4580.6	723.3	723.3
		TOP3A	5391.3		TOP3A	5316.5	1459.2	1459.2
		BLM	5109.2		TOP3A	5391.3	1534	1534
	HeLa_siCTRL_gBLMC18-TOP3A-PICH-15.czi
	Background	PICH	887		BLM	4575	0
	Background	TOP3A	3844.2		BLM	5909.6	1334.6	1334.6
	Background	BLM	4575		BLM	6342.6	1767.6	1767.6
		PICH	1190.8		BLM	6377.6	1802.6	1802.6
		TOP3A	5316		BLM	6003.8	1428.8	1428.8
		BLM	5909.6		BLM	5998.8	1423.8	1423.8
		PICH	1282.1		BLM	5705.5	1130.5	1130.5
		TOP3A	5512.6		BLM	5561.4	986.4	986.4
		BLM	6342.6		BLM	5729.4	1154.4	1154.4
		PICH	1270.3		PICH	887	0
		TOP3A	5765.2		PICH	1190.8	303.8	303.8
		BLM	6377.6		PICH	1282.1	395.1	395.1
		PICH	1223.1		PICH	1270.3	383.3	383.3
		TOP3A	5364.7		PICH	1223.1	336.1	336.1
		BLM	6003.8		PICH	1187.1	300.1	300.1
		PICH	1187.1		PICH	1146.8	259.8	259.8
		TOP3A	5013.7		PICH	1130.6	243.6	243.6
		BLM	5998.8		PICH	1228.8	341.8	341.8
		PICH	1146.8		TOP3A	3844.2	0
		TOP3A	5062.5		TOP3A	5316	1471.8	1471.8
		BLM	5705.5		TOP3A	5512.6	1668.4	1668.4
		PICH	1130.6		TOP3A	5765.2	1921	1921
		TOP3A	4811.6		TOP3A	5364.7	1520.5	1520.5
		BLM	5561.4		TOP3A	5013.7	1169.5	1169.5
		PICH	1228.8		TOP3A	5062.5	1218.3	1218.3
		TOP3A	4864.7		TOP3A	4811.6	967.4	967.4
		BLM	5729.4		TOP3A	4864.7	1020.5	1020.5
	HeLa_siCTRL_gBLMC18-TOP3A-PICH-16.czi
	Background	PICH	787.4		BLM	3895.7	0
	Background	TOP3A	4300.2		BLM	4553.3	657.6	657.6
	Background	BLM	3895.7		BLM	5148.6	1252.9	1252.9
		PICH	912.3		BLM	5808.8	1913.1	1913.1
		TOP3A	5574.3		BLM	5927.7	2032	2032
		BLM	4553.3		BLM	5715.1	1819.4	1819.4
		PICH	1005.8		BLM	5205.9	1310.2	1310.2
		TOP3A	5777.4		BLM	5784.7	1889	1889
		BLM	5148.6		BLM	5828.9	1933.2	1933.2
		PICH	1053.7		BLM	5558.8	1663.1	1663.1
		TOP3A	7086.5		BLM	4540.8	645.1	645.1
		BLM	5808.8		BLM	5089.8	1194.1	1194.1
		PICH	1190		PICH	787.4	0
		TOP3A	7877.4		PICH	912.3	124.9	124.9
		BLM	5927.7		PICH	1005.8	218.4	218.4
		PICH	1042.8		PICH	1053.7	266.3	266.3
		TOP3A	6829.3		PICH	1190	402.6	402.6
		BLM	5715.1		PICH	1042.8	255.4	255.4
		PICH	1070.5		PICH	1070.5	283.1	283.1
		TOP3A	6476.8		PICH	1146.9	359.5	359.5
		BLM	5205.9		PICH	1024	236.6	236.6
		PICH	1146.9		PICH	976.9	189.5	189.5
		TOP3A	6820.5		PICH	961	173.6	173.6
		BLM	5784.7		PICH	1008.7	221.3	221.3
		PICH	1024		TOP3A	4300.2	0
		TOP3A	6075.6		TOP3A	5574.3	1274.1	1274.1
		BLM	5828.9		TOP3A	5777.4	1477.2	1477.2
		PICH	976.9		TOP3A	7086.5	2786.3	2786.3
		TOP3A	6184		TOP3A	7877.4	3577.2	3577.2
		BLM	5558.8		TOP3A	6829.3	2529.1	2529.1
		PICH	961		TOP3A	6476.8	2176.6	2176.6
		TOP3A	5180.2		TOP3A	6820.5	2520.3	2520.3
		BLM	4540.8		TOP3A	6075.6	1775.4	1775.4
		PICH	1008.7		TOP3A	6184	1883.8	1883.8
		TOP3A	6316.9		TOP3A	5180.2	880	880
		BLM	5089.8		TOP3A	6316.9	2016.7	2016.7
