# Supplementary material for: Centromere protection requires strict mitotic inactivation of the Bloom syndrome helicase complex
Source: Research Square preprint supplement (doi:10.21203/rs.3.rs-4420374/v1), 2024-05-30
Supplement: Supplementary file 43 [file Fig S3B,C. HAP1ΔBLM, HeLaGFPTOP3A siBLM_UFBs.xlsx]

## Sheet:  Fig S2B and C Ratio Normalised
	HAP1 deltaBLM TOP3A/PICH						HeLa GFP-TOP3A_TOP3A/PICH						HeLa GFP-TOP3A_BLM/PICH
	Ratio TOP3A/PICH			Normalised to mean HAP1=0.49903862			Ratio TOP3A/PICH			Normalised to mean siCTRL = 0.17723606			Ratio BLM/PICH			Normalised to mean siCTRL=0.29183813
	HAP1	deltaBLM		HAP1	deltaBLM		siCTRL	siBLM		siCTRL	siBLM		siCTRL	siBLM		siCTRL	siBLM
	0.231789	0		0.464471	0		0.21262	0.0490778		1.19964	0.276907		0.381828	0		1.30835	0
	0.282126	0.0921484		0.565339	0.184652		0.194175	0.0286452		1.09557	0.161621		0.284398	0		0.974505	0
	0.38263	0.148945		0.766734	0.298465		0.256149	0.0365255		1.44524	0.206084		0.438337	0		1.50199	0
	0.397858	0.105583		0.797249	0.211573		0.207288	0.0147452		1.16956	0.0831954		0.322972	0		1.10668	0
	0.291	0.217879		0.58312	0.436598		0.147775	0.0168336		0.833776	0.0949781		0.272737	0		0.934548	0
	0.323187	0.15449		0.647618	0.309575		0.166797	0.0166019		0.9411	0.0936712		0.272574	0.000478512		0.933991	0.00163965
	0.319608	0.124981		0.640448	0.250443		0.195727	0.020946		1.10433	0.118181		0.334035	0		1.14459	0
	0.324986	0.102883		0.651224	0.206163		0.163829	0.0243988		0.924352	0.137663		0.271971	0		0.931925	0
	0.222346	0.0749978		0.445549	0.150285		0.199954	0.0286855		1.12818	0.161849		0.286462	0.0319577		0.981579	0.109505
	0.424248	0.0687528		0.85013	0.137771		0.18039	0.0370061		1.01779	0.208796		0.265073	0		0.908287	0
	0.525425	4.43784e-05		1.05287	8.89277e-05		0.130969	0.0167918		0.738952	0.0947427		0.238506	0		0.817254	0
	0.735235	0.0305356		1.4733	0.0611889		0.175458	0.0761526		0.989968	0.429668		0.271351	0.110173		0.9298	0.377513
	0.504812	0.00823027		1.01157	0.0164923		0.147094	0.0611513		0.829933	0.345027		0.267696	0.0335955		0.917274	0.115117
	0.507597	0		1.01715	0		0.116481	0.0621969		0.657209	0.350927		0.235921	0.0695105		0.808397	0.238182
	0.363805	0.00733432		0.729012	0.0146969		0.0927879	0.0379121		0.523527	0.213907		0.207703	0.0562083		0.711708	0.192601
	0.372059	0.0154332		0.745551	0.0309259		0.129063	0.0410001		0.728197	0.23133		0.203366	0.0104405		0.696845	0.0357749
	0.447885	0		0.897496	0		0.127628	0.026382		0.7201	0.148852		0.212112	0.00945697		0.726816	0.0324049
	0.443009	0		0.887726	0		0.10651	0.0393844		0.600949	0.222215		0.19029	0		0.652039	0
	0.577822	0.00510761		1.15787	0.0102349		0.0841262	0.0457117		0.474656	0.257914		0.176213	0.025298		0.603805	0.0866849
	0.419458	0.0284011		0.840533	0.0569117		0.101782	0.0532592		0.574271	0.300499		0.226796	0.0683432		0.777128	0.234182
	0.345565	0		0.692462	0		0.097199	0.0203449		0.548416	0.11479		0.229273	0.0228003		0.785618	0.0781266
	0.505717	0		1.01338	0		0.0958318	0.0239951		0.540702	0.135385		0.213772	0.0196004		0.732503	0.0671619
	0	0		0	0		0.0941523	0		0.531225	0		0.213702	0		0.732261	0
	0.497877	0		0.997672	0		0.0818748	0		0.461953	0		0.203535	0		0.697425	0
	0.428888	0		0.859428	0		0.117508	0		0.663002	0		0.225492	0		0.772661	0
	0.334118	0.0939458		0.669524	0.188254		0.215539	0		1.21611	0		0.697271	0		2.38924	0
	0.355866	0.0285042		0.713103	0.0571183		0.124067	0.00709875		0.700012	0.0400525		0.358755	0		1.2293	0
	0.260591	0.111107		0.522187	0.222643		0.155278	0		0.87611	0		0.555916	0		1.90488	0
	0.373317	0.125829		0.748072	0.252143		0.221627	0		1.25046	0		0.6203	0		2.12549	0
	0.292011	0.0612245		0.585148	0.122685		0.144708	0		0.816468	0		0.486993	0		1.66871	0
	0.249618	0.0376731		0.500198	0.0754914		0.111735	0		0.630433	0		0.461376	0		1.58093	0
	0.230703	0		0.462295	0		0.185765	0		1.04812	0		0.538146	0		1.84399	0
	0.208516	0		0.417835	0		0.148732	0		0.839176	0		0.5208	0		1.78455	0
	0.197462	0		0.395684	0		0.140798	0.0155463		0.79441	0.087715		0.373676	0		1.28042	0
	0.145033	0		0.290626	0		0.119188	0.0267951		0.672481	0.151183		0.321499	0		1.10164	0
	0.279811	0.0319471		0.560701	0.0640173		0.170393	0.0139865		0.961393	0.0789143		0.327671	0		1.12278	0
	1.07297	0		2.15008	0		0.333528	0.0319282		1.88183	0.180145		0.45073	0		1.54445	0
	0.303633	0.0541709		0.608436	0.108551		0.129233	0.0337327		0.729155	0.190326		0.327406	0		1.12187	0
	0.652041	0.0386459		1.30659	0.0774407		0.173493	0.0464155		0.978882	0.261885		0.390007	0.0114103		1.33638	0.039098
	0.507405	0.00831775		1.01676	0.0166675		0.057174	0.0294996		0.322587	0.166443		0.221258	0		0.758154	0
	0.503452	0.0148808		1.00884	0.0298189		0.0796137	0.0134509		0.449196	0.0758926		0.222214	0		0.76143	0
	0.39795	0		0.797434	0		0.0522462	0.0143761		0.294783	0.0811126		0.167178	0		0.572846	0
	0.416728	0		0.835061	0		0.0800277	0.0109037		0.451532	0.0615207		0.208799	0		0.71546	0
	0.440106	0		0.881907	0		0.428548	0.016048		2.41795	0.0905459		0.459404	0.004012		1.57418	0.0137473
	0.70661	0.0582305		1.41594	0.116685		0.409701	0		2.31161	0		0.447008	0		1.5317	0
	0.835245	0		1.67371	0		0.299588	0		1.69033	0		0.372775	0		1.27733	0
	0.826556	0		1.6563	0		0.339033	0		1.91289	0		0.338951	0		1.16143	0
	0.584825	0.258073		1.1719	0.517141		0.214099	0.0168449		1.20799	0.0950422		0.272971	0.0350403		0.935349	0.120068
	0.720197	0.227611		1.44317	0.456098		0.268359	0.0111305		1.51413	0.0628007		0.308992	0.0127238		1.05878	0.0435989
	0.798919	0.324438		1.60092	0.650127		0.315418	0.0200185		1.77965	0.112948		0.37118	0.0498377		1.27187	0.170772
	1.08254	0.417147		2.16925	0.835901		0.322336	0.0117987		1.81868	0.0665708		0.389051	0.00544927		1.33311	0.0186722
	0.874682	0		1.75273	0		0.358326	0.00334168		2.02175	0.0188544		0.315013	0		1.07941	0
	1.36111	0.0141144		2.72746	0.0282831		0.297922	0.0503168		1.68093	0.283897		0.307317	0.0305942		1.05304	0.104833
	1.32104	0.0348066		2.64718	0.0697473		0.273652	0.0488674		1.544	0.275719		0.384175	0.0371936		1.3164	0.127446
	0.582358	0		1.16696	0		0.246225	0.0289956		1.38925	0.163599		0.421145	0.0340445		1.44308	0.116655
	0.40083	0.0229935		0.803204	0.0460755		0.205057	0.02502		1.15697	0.141168		0.374077	0.0235209		1.28179	0.0805956
	0.221712	0		0.444278	0		0.255353	0.0291985		1.44075	0.164744		0.462264	0.00190764		1.58397	0.00653662
	0.561736	0.0634942		1.12564	0.127233		0.256054	0.0121679		1.44471	0.0686535		0.430363	0.0117892		1.47466	0.0403962
	0.699749	0.0361882		1.40219	0.0725158		0.289726	0.0230618		1.63469	0.130119		0.425466	0.0391524		1.45788	0.134158
	0.580946	0.000215095		1.16413	0.00043102		0.227294	0.00186419		1.28243	0.0105181		0.347946	0		1.19226	0
	0.845427	0.0181557		1.69411	0.0363813		0.236029	0.0302661		1.33172	0.170767		0.331674	0		1.1365	0
	0.82834	0.141176		1.65987	0.282895		0.287774	0.042821		1.62368	0.241604		0.324603	0		1.11227	0
	0.733571	0.1505		1.46997	0.30158		0.298996	0.0623303		1.68699	0.351679		0.354222	0.0129721		1.21376	0.0444497
	1.55575	0.150423		3.1175	0.301426		0.0447291	0.0650626		0.25237	0.367096		0.136522	0.025025		0.4678	0.0857496
	0.300076	0.0675132		0.601309	0.135286		0.0754665	0.0912508		0.425797	0.514855		0.176954	0.0333895		0.606342	0.114411
	0.624346	0.0870235		1.2511	0.174382		0.0834049	0.0218227		0.470587	0.123128		0.160859	0.0131506		0.551194	0.0450612
	0.354589	0		0.710544	0		0.0641677	0.0408657		0.362047	0.230572		0.133572	0.0385092		0.457691	0.131954
	0.525637	0		1.0533	0		0.054957	0.0420113		0.310078	0.237036		0.133695	0.047457		0.458115	0.162614
	1.20193	0		2.40849	0		0.0728814	0.0512082		0.411211	0.288927		0.194963	0.0601955		0.668052	0.206263
	0.636818	0		1.27609	0		0.0864877	0.0671662		0.48798	0.378965		0.19295	0.0882839		0.661154	0.30251
	0.86579	0		1.73492	0		0.0735576	0.052832		0.415026	0.298088		0.17434	0.059823		0.597386	0.204987
	0.705641	0		1.414	0		0.0677	0.0411701		0.381976	0.23229		0.154651	0.0450375		0.529921	0.154323
	0.641626	0		1.28572	0		0.0533837	0.0398602		0.301201	0.224899		0.144444	0.0617243		0.494945	0.211502
	0.488389	0		0.97866	0		0.0609769	0.0408056		0.344044	0.230233		0.164386	0.0479768		0.563278	0.164395
	0.424456	0		0.850548	0		0.0811822	0		0.458046	0		0.231612	0		0.793633	0
	0.682513	0.00037386		1.36766	0.00074916		0.142716	0		0.805232	0		0.17411	0.343599		0.596597	1.17736
	0.401117	0.0422423		0.80378	0.0846473		0.0915366	0		0.516467	0		0.134427	0.212876		0.460621	0.729432
	0.488732	0.0135085		0.979348	0.027069		0.0954831	0.0142269		0.538734	0.0802712		0.164807	0.186836		0.56472	0.640203
	0.501384	0.0101134		1.0047	0.0202658		0.14506	0.0268113		0.818454	0.151275		0.181434	0.141409		0.621693	0.484545
	0.471887	0.0183325		0.945592	0.0367355		0.179811	0.0145664		1.01453	0.0821867		0.191603	0.139376		0.656538	0.477578
	0.424619	0.0324674		0.850874	0.0650598		0.12238	0.000142916		0.69049	0.000806359		0.211006	0.150455		0.723025	0.515541
	0.600553	0.00103697		1.20342	0.00207794		0.121633	0		0.686277	0		0.201158	0.183565		0.689278	0.628997
	0.432415	0		0.866496	0		0.118908	0		0.670899	0		0.19966	0.120802		0.684148	0.413936
	0.432107	0		0.86588	0		0.123514	0		0.696891	0		0.20855	0.0860511		0.714607	0.294859
	0.522129	0		1.04627	0		0.153593	0		0.866602	0		0.263628	0.11796		0.903337	0.404196
	0.400713	0		0.80297	0		0.176677	0		0.996848	0		0.220014	0		0.75389	0
	0.517448	0		1.03689	0		0.187091	0.0363759		1.0556	0.20524		0.290633	0		0.99587	0
	0.527648	0		1.05733	0		0.164634	0.0405387		0.928897	0.228727		0.296038	0		1.01439	0
	0.560232	0		1.12262	0		0.459975	0.0576154		2.59527	0.325077		0.477068	0		1.6347	0
	0.36921	0.0251525		0.739842	0.050402		0.38699	0.0539934		2.18347	0.304641		0.437947	0		1.50065	0
	0.656453	0.014563		1.31543	0.0291822		0.434255	0.0324238		2.45015	0.182941		0.49762	0		1.70512	0
	0.727283	0.0194422		1.45737	0.0389592		0.403442	0		2.2763	0		0.473484	0		1.62242	0
	1.31422	0		2.6335	0		0.359259	0		2.02701	0		0.453041	0		1.55237	0
	0.436869	0		0.875421	0		0.328532	0		1.85364	0		0.494056	0		1.69291	0
	1.10796	0		2.22018	0		0.179034	0		1.01014	0		0.286648	0		0.982215	0
	0.237394	0.0747539		0.475702	0.149796		0.243127	0		1.37177	0		0.376769	0		1.29102	0
	1.07819	0.10318		2.16054	0.206757		0.320388	0		1.80769	0		0.431997	0		1.48026	0
	0.751926	0.146545		1.50675	0.293654		0.169096	0.0363759		0.95407	0.20524		0.296503	0		1.01599	0
	0.147001	0.140117		0.294569	0.280773		0.159356	0.0405387		0.899116	0.228727		0.316711	0		1.08523	0
	0.294166	0.173117		0.589465	0.346901		0.16818	0.0576154		0.948903	0.325077		0.29583	0		1.01368	0
	0.44786	0.144274		0.897446	0.289104		0.0770789	0.0539934		0.434894	0.304641		0.207946	0		0.712539	0
	0.437863	0.222682		0.877412	0.446222		0.120072	0.0324238		0.677471	0.182941		0.25468	0		0.872674	0
	0.277721	0.128677		0.556511	0.25785		0.117976	0		0.665641	0		0.231802	0		0.794284	0
	0.312656	0.160624		0.626516	0.321866		0.0505723	0		0.285339	0		0.156855	0		0.537473	0
	0.241603	0.21171		0.484137	0.424237		0.19749	0		1.11427	0		0.378999	0		1.29866	0
	0.339692	0.207812		0.680694	0.416424		0.0808854	0		0.456371	0		0.211161	0		0.723556	0
	0.33996	0.147588		0.68123	0.295744		0.067587	0		0.381339	0		0.198857	0		0.681395	0
	0.383051	0.156221		0.767578	0.313045		0.0931796	0		0.525737	0		0.259315	0		0.888557	0
	0.442156	0.213096		0.886016	0.427014		0.0830753	0		0.468727	0		0.231722	0.0131185		0.794008	0.0449512
	0.210931	0.215885		0.422675	0.432601		0.0893137	0		0.503925	0		0.252652	0		0.865725	0
	0.348133	0.133986		0.697608	0.268488		0.0801427	0.00388602		0.45218	0.0219257		0.221496	0.0127049		0.758967	0.0435341
	0.282717	0		0.566524	0		0.0725955	0.00518402		0.409598	0.0292493		0.266288	0.0121781		0.91245	0.041729
	0.244086	0		0.489112	0		0.060327	0.0129846		0.340376	0.0732615		0.188904	0.0203991		0.647292	0.0698987
	0.330239	0		0.661751	0		0.101045	0.000344085		0.570115	0.00194139		0.239707	0		0.821369	0
	0.527535	0		1.0571	0		0.373954	0.00253125		2.10992	0.0142818		0.518007	0		1.77498	0
	0.764455	0		1.53186	0		0.232748	0		1.31321	0		0.489846	0		1.67849	0
	0.692178	0.00321874		1.38702	0.00644988		0.177635	0		1.00225	0		0.405342	0		1.38893	0
	0.736417	0		1.47567	0		0.197148	0		1.11235	0		0.477381	0		1.63577	0
	0.251153	0		0.503273	0		0.0651819	0		0.367769	0		0.234494	0		0.803506	0
	0.635252	0.0153662		1.27295	0.0307916		0.0599796	0		0.338417	0		0.226825	0		0.77723	0
	0.310617	0.00200401		0.622431	0.00401574		0.061029	0		0.344337	0		0.267075	0		0.915147	0
	0.367984	0.0261393		0.737386	0.0523793		0.0866973	0		0.489163	0		0.275737	0		0.944828	0
	0.686358	0.130478		1.37536	0.261459		0.0842325	0		0.475256	0		0.324722	0		1.11268	0
	0.447298	0.110939		0.89632	0.222305		0.0922602	0		0.52055	0		0.299251	0.0079678		1.0254	0.0273021
	0.473747	0.212786		0.949319	0.426393		0.10057	0		0.567436	0		0.303639	0		1.04044	0
	0.462389	0.207738		0.92656	0.416276		0.0932471	0		0.526118	0		0.301465	0		1.03299	0
	0.48371	0		0.969285	0		0.108029	0		0.609518	0		0.32528	0.00684539		1.11459	0.0234561
	0.487912	0		0.977705	0		0.0700524	0		0.395249	0		0.265016	0		0.908092	0
	0.315658	0		0.632533	0		0.0679346	0.110619		0.3833	0.624136		0.25267	0.0598218		0.865787	0.204983
	1.044	0		2.09203	0		0.0663817	0.0360367		0.374538	0.203326		0.232369	0		0.796226	0
	0.751751	0		1.5064	0		0.0547322	0.0596611		0.30881	0.336619		0.132229	0		0.453091	0
	0.281309	0		0.563701	0		0.128081	0.106025		0.722655	0.598211		0.212958	0.0783234		0.729711	0.26838
	0.466063	0		0.933922	0		0.112	0.101691		0.631928	0.573758		0.215477	0.0720193		0.738345	0.246778
	0.411664	0.00677441		0.824914	0.0135749		0.0814207	0.0834907		0.459391	0.471071		0.197502	0.107491		0.676751	0.368325
	0.549152	0.0482595		1.10042	0.096705		0.126158	0.0389919		0.71181	0.22		0.215042	0.000536234		0.736854	0.00183744
	0.569952	0		1.1421	0		0.129287	0.0207061		0.729459	0.116828		0.237772	0.00125897		0.81474	0.00431394
	0.459569	0		0.920908	0		0.1174	0.0330865		0.662391	0.18668		0.246441	0		0.844443	0
	0.734181	0.00701136		1.47119	0.0140497		0.0796676	0.0244659		0.4495	0.138041		0.156231	0		0.535336	0
	0.352762	0		0.706884	0		0.138056	0.0275432		0.778941	0.155404		0.2019	0		0.691823	0
	0	0.00199351		0	0.0039947		0.174821	0.0268939		0.986376	0.151741		0.203131	0.0253286		0.69604	0.08679
	0.327658	0.0214644		0.656579	0.0430114		0.459651	0.0279345		2.59344	0.157612		0.376994	0		1.29179	0
	0.321134	0		0.643506	0		0.363571	0.0258437		2.05134	0.145815		0.306091	0		1.04884	0
	0.322292	0.00875225		0.645826	0.0175382		0.306109	0.042422		1.72713	0.239353		0.257078	0.0537821		0.880893	0.184287
	0.391776	0		0.785062	0		0.228648	0.0362684		1.29008	0.204633		0.250687	0.0168424		0.858994	0.0577115
	0.39077	0		0.783045	0		0.30133	0.0410053		1.70016	0.23136		0.281868	0.0159426		0.965838	0.0546283
	0.516535	0.00350751		1.03506	0.00702852		0.184195	0		1.03927	0		0.219678	0		0.752741	0
	0.314936	0		0.631085	0		0.255239	0		1.44011	0		0.290037	0		0.993828	0
	0.232372	0		0.465639	0		0.249206	0		1.40607	0		0.306327	0		1.04965	0
	0.125645	0		0.251774	0		0.35067	0		1.97855	0		0.324335	0		1.11135	0
	0	0.0635228		0	0.12729		0.240244	0		1.3555	0		0.245587	0		0.841519	0
	0.438532	0.00503183		0.878754	0.010083		0.274325	0.00468097		1.54779	0.0264109		0.25362	0		0.869042	0
	0.498603	0.106409		0.999128	0.213228		0.228629	0		1.28997	0		0.25284	0		0.866371	0
		0.0586845			0.117595		0.283998	0		1.60237	0		0.275669	0		0.944596	0
							0.229589	0		1.29539	0		0.272666	0		0.934305	0
							0.217473	0.0225699		1.22702	0.127344		0.242355	0		0.830442	0
							0.381806	0		2.15423	0		0.387212	0		1.3268	0
							0.341761	0		1.92828	0		0.386634	0		1.32482	0
							0.22059	0.0199785		1.24461	0.112722		0.251817	0		0.862864	0
							0.169045	0.0402309		0.953786	0.22699		0.222276	0		0.761641	0
							0.18426	0.0396144		1.03963	0.223512		0.234784	0		0.804502	0
							0.186817	0.0193156		1.05406	0.108982		0.223386	0		0.765446	0
							0.165733	0.0384194		0.935099	0.21677		0.184128	0		0.630926	0
							0.347175	0.0482651		1.95883	0.272321		0.296966	0		1.01757	0
								0.0829902			0.468247			0			0
								0.0758236			0.427811			0			0
								0.0645858			0.364406			0			0
								0.0524638			0.296011			0			0
								0.0244663			0.138044			0.00205389			0.00703776
								0.0422774			0.238537			0			0
								0.032689			0.184438			0.017797			0.0609824
								0.0506826			0.285961			0.00325271			0.0111456
								0.0171148			0.0965647			0			0
								0.080499			0.454191			0.0710417			0.243428
								0.083494			0.471089			0.0338182			0.11588
								0.0566274			0.319503			0.0135747			0.0465145
								0.0385975			0.217774			0.00559921			0.019186
								0.0218176			0.123099			0.0432859			0.148322
								0.0129757			0.0732112			0			0
								0			0			0			0
								0			0			0			0
								0			0			0			0
								0.00860233			0.048536			0			0
								0.0142764			0.0805504			0.00121872			0.00417601
								0.0144383			0.0814638			0.00133277			0.00456681
								0			0			0			0

## Sheet: HAP1,ΔBLM AbsoluteValues
		Absolute values
		HAP1		ΔBLM
		PICH	TOP3A	PICH	TOP3A
		3757.3	870.9	2935.2	0
		3766.4	1062.6	6807.5	627.3
		3374.8	1291.3	6870.3	1023.3
		3734.5	1485.8	5808.7	613.3
		2892.1	841.6	6165.8	1343.4
		3285.1	1061.7	7394	1142.3
				7866.8	983.2
		1255.6	401.3	7047.8	725.1
		1405.6	456.8	7978.9	598.4
		1612.8	358.6	5707.4	392.4
		1774.2	752.7	4506.7	0.2
		2357.9	1238.9	3622	110.6
		2387.4	1755.3
		3304	1667.9	4617.1	38
		3711.8	1884.1	3192	0
		3823.2	1390.9	4976.6	36.5
		3731.4	1388.3	5410.4	83.5
		3293.7	1475.2	7153.2	0
		2214.4	981	5957.2	0
		1604.3	927	7322.4	37.4
		1901.5	797.6	6492.7	184.4
		2052	709.1	6371.9	0
				5151.5	0
		2685.1	1357.9	5711.8	0
		2389.5	0	4466.5	0
		3156	1571.3
		3749.7	1608.2	1257.1	0
		4799.8	1603.7	2026.7	190.4
		3825.6	1361.4	2083.9	59.4
		4534.3	1181.6	2966.5	329.6
		4530.2	1691.2	3091.5	389
		3881.7	1133.5	2915.5	178.5
		4712.8	1176.4	2195.2	82.7
		3939.7	908.9	1666	0
		4434.2	924.6	1351.5	0
		3931.9	776.4	1350.5	0
		4706.5	682.6
		3985.9	1115.3	4334.1	0
				2707.6	86.5
		1681.5	1804.2	4921	0
				4301.2	233
		2865.3	870	9429.2	364.4
		3430	2236.5	5506.3	45.8
		4983.4	2528.6	5355.9	79.7
		3998.2	2012.9	5330.7	0
		4293	1708.4	5392.4	0
		4216.9	1757.3	4462.3	0
		5595.7	2462.7	5763.3	335.6
				3572.1	0
		2093.8	1479.5
		1944.1	1623.8	1997.8	0
		1982.2	1638.4	2576.4	664.9
				3295.1	750
		860.6	503.3	2394.6	776.9
		1053.6	758.8	2255.8	941
		1277.1	1020.3
		1663.4	1800.7	2164.9	0
		2440.2	2134.4	2784.4	39.3
		1139	1550.3	2608.7	90.8
		995.5	1315.1	2671.9	0
		1563.3	910.4	3483.6	80.1
		939.8	376.7	3128.3	0
				4394.1	279
		3874.4	859	4310.8	156
		3011.2	1691.5	4649.1	1
		3582	2506.5	1531.2	27.8
		2523.3	1465.9
		2275.3	1923.6	3703.9	522.9
		2439.7	2020.9	3940.2	593
		2666	1955.7	3897	586.2
		1460.9	2272.8	4520.6	305.2
		4326.9	1298.4	6616.6	575.8
		2275.5	1420.7	5807.4	0
				7099.9	0
		1627.8	577.2	4453.8	0
		2139.5	1124.6	3129.9	0
		1193	1433.9	3284.7	0
		1241.8	790.8	2217.7	0
		1057.3	915.4
		1074.2	758	1276.6	0
		1478.9	948.9	2972.4	0
		1502.9	734	3428.1	0
		1489.2	632.1	4012.2	1.5
		1870	1276.3	4263.5	180.1
				5100.5	68.9
		1306.6	524.1	3826.6	38.7
		3905	1908.5	3234.7	59.3
		3432.9	1721.2	3575.9	116.1
		2020.4	953.4	2796.6	2.9
		2244.6	953.1	2465.6	0
		2423.6	1455.5
		3292.9	1423.9	3114.4	0
		3393.6	1466.4	6124	0
		2695.5	1407.4	3595.7	0
		3030.1	1214.2	5289.6	0
		2298.2	1189.2	6721.3	0
		1967.6	1038.2	4750.4	0
		1603.8	898.5	7343.2	184.7
		1388.1	512.5	7608.3	110.8
				7514.6	146.1
		1990.7	1306.8	8949	0
		2666.5	1939.3	4774.9	0
		1377.7	1810.6	3268.7	0
		2198.6	960.5
		1906.3	2112.1	751.8	56.2
		1412	335.2	1669.9	172.3
				2460	360.5
		1364.6	1471.3	1866.3	261.5
		2725.8	2049.6	2245.3	388.7
				2721.9	392.7
		2202.7	323.8	2416	538
		3419.5	1005.9	4048.9	521
		2537.4	1136.4	2598	417.3
		3325.7	1456.2	1386.8	293.6
		2335.8	648.7	862.8	179.3
		3375.6	1055.4	3807.9	562
		3897.3	941.6
		3653.6	1241.1	2289.7	357.7
		3440.7	1169.7	2402.2	511.9
		3092.8	1184.7	2054.8	443.6
		1218.8	538.9	1951.7	261.5
		3485.5	735.2	1916.9	0
		3680.2	1281.2	1635.5	0
		2183.1	617.2	1736.2	0
				1523.5	0
		1969.8	480.8
		2596.3	857.4	1719.2	0
		2529.5	1334.4	5157.3	16.6
		1831.5	1400.1	4348.5	0
		2486.5	1721.1	2517.8	0
		2516.1	1852.9	1672.5	25.7
		2060.1	517.4
				1996	4
		1594.8	1013.1	2027.6	53
		3003.7	933	2101.5	274.2
		2398.2	882.5	2259.8	250.7
		1565.8	1074.7	2081.9	443
		1541.7	689.6	2127.2	441.9
		1517.9	719.1
		1220.4	564.3	910.1	0
		1025.2	495.9	833.4	0
				1245.9	0
		1087.9	530.8	1692.9	0
		2248	709.6	1329	0
		945.4	987	1039	0
		1470.3	1105.3	1714.5	0
		1922.8	540.9
		1215.5	566.5	3099.9	21
				2869.9	138.5
		3273.3	1347.5	5929.6	0
		3938.8	2163	6039.3	0
		3018.5	1720.4	5220.1	36.6
		3069.4	1410.6	5166.8	0
		3272.9	2402.9	4314	8.6
		1942.1	685.1	4011.3	86.1
		1279.9	0	2921.8	0
		7653.1	2507.6	3164.9	27.7
		7557.9	2427.1	2889.5	0
		5995.8	1932.4	3002.1	0
		5014.6	1964.6	3877.4	13.6
		4962	1939	2678.5	0
		4109.5	2122.7	2855.7	0
		6240	1965.2	3705.4	0
		8307.8	1930.5
		6102.9	766.8	5988.4	380.4
		1310.7	0	4948.5	24.9
		4510.5	1978	5635.8	599.7
		3937.6	1963.3	5626.7	330.2
				6415.1	280.1
				5457.4	180.1
				9336.3	538.2
				8668.7	359.5
				7080.2	394.4
				6148.8	213.9
				5077.8	228.4
				5842.5	285.1
				4178.1	239.6
				6535.7	272.4

## Sheet: GFP-TOP3A siBLM Absolute Values
	HeLa GFP TOP3A BLM					HeLa GFP TOP3A TOP3A
	siCTRL		siBLM			siCTRL		siBLM
	PICH	BLM	PICH	BLM		PICH	TOP3A	PICH	TOP3A
	6217.2	2373.9	5725.6	0		6217.2	1321.9	5725.6	281
	6358.7	1808.4	8835.7	0		6358.7	1234.7	8835.7	253.1
	5337.9	2339.8	10918.4	0		5337.9	1367.3	10918.4	398.8
	8811.9	2846	6578.4	0		8811.9	1826.6	6578.4	97
	10712.9	2921.8	8049.4	0		10712.9	1583.1	8049.4	135.5
	9211.8	2510.9	12329.9	5.9		9211.8	1536.5	12329.9	204.7
	8504.2	2840.7	11649	0		8504.2	1664.5	11649	244
	9630.8	2619.3	11672.7	0		9630.8	1577.8	11672.7	284.8
	8653.5	2478.9	14272	456.1		8653.5	1730.3	14272	409.4
	8699.5	2306	11503.5	0		8699.5	1569.3	11503.5	425.7
	9798.5	2337	6884.3	0		9798.5	1283.3	6884.3	115.6
	7226.8	1961				7226.8	1268
			2995.3	330				2995.3	228.1
	9349.8	2502.9	4768.5	160.2		9349.8	1375.3	4768.5	291.6
	10883.3	2567.6	6371.7	442.9		10883.3	1267.7	6371.7	396.3
	16016.1	3326.6	7804.9	438.7		16016.1	1486.1	7804.9	295.9
	9174.6	1865.8	5775.6	60.3		9174.6	1184.1	5775.6	236.8
	9718.9	2061.5	7994.1	75.6		9718.9	1240.4	7994.1	210.9
	11583.9	2204.3	4938.5	0		11583.9	1233.8	4938.5	194.5
	16091.3	2835.5				16091.3	1353.7
	18495.5	4194.7	4790.9	121.2		18495.5	1882.5	4790.9	219
	15337.6	3516.5	8704.6	594.9		15337.6	1490.8	8704.6	463.6
	14709.1	3144.4	8837.6	201.5		14709.1	1409.6	8837.6	179.8
	14604	3120.9	7122.3	139.6		14604	1375	7122.3	170.9
	13198.2	2686.3				13198.2	1080.6
	9344.9	2107.2	5413.4	0		9344.9	1098.1	5413.4	0
			8920.8	0				8920.8	0
	4023.4	2805.4	11736.7	0		4023.4	867.2	11736.7	0
	12278	4404.8	8805.9	0		12278	1523.3	8805.9	0
	8712.1	4843.2	12340.2	0		8712.1	1352.8	12340.2	87.6
	4986.3	3093	9130.5	0		4986.3	1105.1	9130.5	0
	6515.9	3173.2	12647.2	0		6515.9	942.9	12647.2	0
	9948.5	4590	16013.8	0		9948.5	1111.6	16013.8	0
	5922	3186.9	15370	0		5922	1100.1	15370	0
	4851	2526.4	9290.2	0		4851	721.5	9290.2	0
			6515.7	0				6515.7	0
	6570.4	2455.2				6570.4	925.1
	9968.3	3204.8	4444.8	0		9968.3	1188.1	4444.8	69.1
	7593.6	2488.2	6001.1	0		7593.6	1293.9	6001.1	160.8
	2904.4	1309.1	6320.4	0		2904.4	968.7	6320.4	88.4
	5572.9	1824.6	9662.3	0		5572.9	720.2	9662.3	308.5
	6596.8	2572.8	10775.9	0		6596.8	1144.5	10775.9	363.5
			10718.4	122.3				10718.4	497.5
	8726	1930.7	7566.2	0		8726	498.9	7566.2	223.2
	8293.8	1843	11850.5	0		8293.8	660.3	11850.5	159.4
	12443	2080.2	12569.5	0		12443	650.1	12569.5	180.7
	8946.9	1868.1	15389.3	0		8946.9	716	15389.3	167.8
			10867.4	43.6				10867.4	174.4
	10915	5014.4	8285.4	0		10915	4677.6	8285.4	0
	10574.3	4726.8	11929.9	0		10574.3	4332.3	11929.9	0
	14196.5	5292.1				14196.5	4253.1
	10972.1	3719	6319.3	0		10972.1	3719.9	6319.3	0
	19430.3	5303.9	8144.9	285.4		19430.3	4160	8144.9	137.2
	17325.7	5353.5	8975.3	114.2		17325.7	4649.5	8975.3	99.9
	12847.4	4768.7	11029.8	549.7		12847.4	4052.3	11029.8	220.8
	12027.2	4679.2	14552.4	79.3		12027.2	3876.8	14552.4	171.7
	8457.1	2664.1	10743.1	0		8457.1	3030.4	10743.1	35.9
			8710.8	266.5				8710.8	438.3
	7280.1	2237.3	11924.1	443.5		7280.1	2168.9	11924.1	582.7
	8375.6	3217.7	18261.4	621.7		8375.6	2292	18261.4	529.5
	11279.5	4750.3	14608.3	343.6		11279.5	2777.3	14608.3	365.5
	14862.2	5559.6	10274.5	19.6		14862.2	3047.6	10274.5	300
	12227	5652.1	10297.6	121.4		12227	3122.2	10297.6	125.3
	11074.6	4766.1	7588.3	297.1		11074.6	2835.7	7588.3	175
	10002.2	4255.6				10002.2	2897.9
	11577.1	4028.2	8207.3	0		11577.1	2631.4	8207.3	15.3
	12014.2	3984.8	15360.4	0		12014.2	2835.7	15360.4	464.9
	7773.8	2523.4	9915.7	0		7773.8	2237.1	9915.7	424.6
	8548.6	3028.1	8102	105.1		8548.6	2556	8102	505
			8199.8	205.2				8199.8	533.5
	10751.4	1467.8	7715	257.6		10751.4	480.9	7715	704
	9131.2	1615.8				9131.2	689.1
	8150.6	1311.1	13687.6	180		8150.6	679.8	13687.6	298.7
	10961.9	1464.2	19605.7	755		10961.9	703.4	19605.7	801.2
	15268.3	2041.3	15755.3	747.7		15268.3	839.1	15755.3	661.9
	14036.5	2736.6	15833.4	953.1		14036.5	1023	15833.4	810.8
	11489.5	2216.9	12771.3	1127.5		11489.5	993.7	12771.3	857.8
	13638.3	2377.7	15019.3	898.5		13638.3	1003.2	15019.3	793.5
	13542.1	2094.3	17143.5	772.1		13542.1	916.8	17143.5	705.8
	18844.7	2722	16598	1024.5		18844.7	1006	16598	661.6
	16808	2763	10263.3	492.4		16808	1024.9	10263.3	418.8
	8739.6	2024.2	5089.8	0		8739.6	709.5	5089.8	0
	9521	1657.7	2711.3	931.6		9521	1358.8	2711.3	0
	19109.3	2568.8	3456	735.7		19109.3	1749.2	3456	0
	20352.3	3354.2	4667.2	872		20352.3	1943.3	4667.2	66.4
	12836.1	2328.9	6351.8	898.2		12836.1	1862	6351.8	170.3
	12177.8	2333.3	7139.7	995.1		12177.8	2189.7	7139.7	104
	17779.1	3751.5	5597.7	842.2		17779.1	2175.8	5597.7	0.8
	19521	3926.8	3964.8	727.8		19521	2374.4	3964.8	0
	18139.3	3621.7	7667.9	926.3		18139.3	2156.9	7667.9	0
	16936.5	3532.1	7558.3	650.4		16936.5	2091.9	7558.3	0
	16541.1	4360.7	4305.7	507.9		16541.1	2540.6	4305.7	0
	10263.9	2258.2				10263.9	1813.4
	8713.4	2532.4	1927.1	0		8713.4	1630.2	1927.1	0
	11979.9	3546.5	5176.5	0		11979.9	1972.3	5176.5	188.3
			5086.5	0				5086.5	206.2
	5043.1	2405.9	5604.4	0		5043.1	2319.7	5604.4	322.9
	5335.8	2336.8	8815.9	0		5335.8	2064.9	8815.9	476
	5484.1	2729	8543.1	0		5484.1	2381.5	8543.1	277
	6873.1	3254.3	6360.8	0		6873.1	2772.9	6360.8	0
	6691	3031.3	5171.8	0		6691	2403.8	5171.8	0
	7268.4	3591	6397.7	0		7268.4	2387.9	6397.7	0
			7942.7	0				7942.7	0
	9518.3	2728.4	3490.7	0		9518.3	1704.1	3490.7	0
	9682.6	3648.1				9682.6	2354.1
	8062.1	3482.8	1927.1	0		8062.1	2583	1927.1	0
	10581	3137.3	5176.5	0		10581	1789.2	5176.5	188.3
	11895.4	3767.4	5086.5	0		11895.4	1895.6	5086.5	206.2
	11036.4	3264.9	5604.4	0		11036.4	1856.1	5604.4	322.9
	16040.7	3335.6	8815.9	0		16040.7	1236.4	8815.9	476
	15823.8	4030	8543.1	0		15823.8	1900	8543.1	277
	14631	3391.5	6360.8	0		14631	1726.1	6360.8	0
	9653.5	1514.2	5171.8	0		9653.5	488.2	5171.8	0
			6397.7	0				6397.7	0
	3529.3	1337.6	7942.7	0		3529.3	697	7942.7	0
	14294.3	3018.4	3490.7	0		14294.3	1156.2	3490.7	0
	17675	3514.8				17675	1194.6
	19847.7	5146.8	9230.7	0		19847.7	1849.4	9230.7	0
	8009.6	1856	11144.6	146.2		8009.6	665.4	11144.6	0
	11681.3	2951.3	11641.8	0		11681.3	1043.3	11641.8	0
	9449.4	2093	18244.9	231.8		9449.4	757.3	18244.9	70.9
	9603.9	2557.4	20717.5	252.3		9603.9	697.2	20717.5	107.4
	7774.3	1468.6	21849	445.7		7774.3	469	21849	283.7
	7818.3	1874.1	15693.8	0		7818.3	790	15693.8	5.4
	860.8	445.9	19674.1	0		860.8	321.9	19674.1	49.8
			19092.5	0				19092.5	0
	3141.6	1538.9	11571	0		3141.6	731.2	11571	0
	4956.8	2009.2				4956.8	880.5
	6249.1	2983.2	8405.6	0		6249.1	1232	8405.6	0
			9816.2	0				9816.2	0
	11530.8	2703.9	11950.7	0		11530.8	751.6	11950.7	0
	17681	4010.5	11963.2	0		17681	1060.5	11963.2	0
	15240.3	4070.3	8989.6	0		15240.3	930.1	8989.6	0
	15698.3	4328.6	11402.1	0		15698.3	1361	11402.1	0
	14392.3	4673.5	8421.4	67.1		14392.3	1212.3	8421.4	0
	17494	5235.1	7097.3	0		17494	1614	7097.3	0
	15451.9	4691.8	11113.1	0		15451.9	1554	11113.1	0
	15218.7	4587.9	12548.6	85.9		15218.7	1419.1	12548.6	0
	19933.6	6484	14631.4	0		19933.6	2153.4	14631.4	0
	15467	4099				15467	1083.5
	18186.6	4595.2	6870.4	411		18186.6	1235.5	6870.4	760
	15067.4	3501.2	7334.2	0		15067.4	1000.2	7334.2	264.3
			7458.8	0				7458.8	445
	12159.2	1607.8	7866.1	616.1		12159.2	665.5	7866.1	834
	20000.7	4259.3	7920.1	570.4		20000.7	2561.7	7920.1	805.4
	24813.3	5346.7	7729	830.8		24813.3	2779.1	7729	645.3
	20975	4142.6				20975	1707.8
	14210.7	3055.9	6527	3.5		14210.7	1792.8	6527	254.5
	17648.4	4196.3	7466.4	9.4		17648.4	2281.7	7466.4	154.6
	23621.9	5821.4	8115.1	0		23621.9	2773.2	8115.1	268.5
	17301.9	2703.1	7062.9	0		17301.9	1378.4	7062.9	172.8
	15450.2	3119.4	6749.4	0		15450.2	2133	6749.4	185.9
	12027.7	2443.2	10924.4	276.7		12027.7	2102.7	10924.4	293.8
			12332.4	0				12332.4	344.5
	6023.7	2270.9	11805.6	0		6023.7	2768.8	11805.6	305.1
	8112.3	2483.1	11496.4	618.3		8112.3	2949.4	11496.4	487.7
	9402.2	2417.1	14243.8	239.9		9402.2	2878.1	14243.8	516.6
	13934.5	3493.2	11403.4	181.8		13934.5	3186.1	11403.4	467.6
	11648.7	3283.4	7244.4	0		11648.7	3510.1	7244.4	0
	14012.3	3078.2				14012.3	2581
	18061.5	5238.5	6424.1	0		18061.5	4610	6424.1	0
	13720	4202.8	8573.7	0		13720	3419.1	8573.7	0
	9242.3	2997.6	8260.9	0		9242.3	3241	8260.9	0
	14877.4	3653.7	13047.9	0		14877.4	3574.2	13047.9	0
	11707.3	2969.2	10190.2	0		11707.3	3211.6	10190.2	47.7
	16707.4	4224.3	9665.5	0		16707.4	3819.8	9665.5	0
	12367	3409.2	8554.4	0		12367	3512.2	8554.4	0
	13882.2	3785.2	11521.8	0		13882.2	3187.2	11521.8	0
	15175.7	3677.9	12521.1	0		15175.7	3300.3	12521.1	282.6
	8029.2	3109	4089.3	0		8029.2	3065.6	4089.3	0
	9449	3653.3	12193.2	0		9449	3229.3	12193.2	0
	15233.7	3836.1	6406.9	0		15233.7	3360.4	6406.9	128
	18666	4149	6410.5	0		18666	3155.4	6410.5	257.9
	18116.2	4253.4	7769.9	0		18116.2	3338.1	7769.9	307.8
	15395.3	3439.1	8345.6	0		15395.3	2876.1	8345.6	161.2
	15053.1	2771.7	8766.4	0		15053.1	2494.8	8766.4	336.8
	5757.9	1709.9	9493.4	0		5757.9	1999	9493.4	458.2
			8402.2	0				8402.2	697.3
			7619	0				7619	577.7
			8144.2	0				8144.2	526
			8310.5	0				8310.5	436
			12756.3	26.2				12756.3	312.1
			10369.6	0				10369.6	438.4
			9260	164.8				9260	302.7
			13742.4	44.7				13742.4	696.5
			10429.6	0				10429.6	178.5
			9379	666.3				9379	755
			9749.2	329.7				9749.2	814
			11595.1	157.4				11595.1	656.6
			12394.6	69.4				12394.6	478.4
			6870.6	297.4				6870.6	149.9
			6180.8	0				6180.8	80.2
			6382.4	0				6382.4	0
			8039.6	0				8039.6	0
			8107.5	0				8107.5	0
			11880.5	0				11880.5	102.2
			14933.7	18.2				14933.7	213.2
			14856.3	19.8				14856.3	214.5
			9256.8	0				9256.8	0

## Sheet: HAP1, ΔBLM Raw Data
	HAP1_+ICRF-193_TOP3A-PICH											deltaBLM_+ICRF-193_TOP3A-PICH
Exp 2020-01-30	HAP1_STB_ICRF 0.5uM_TOP3A-PICH-02.czi			Area	Mean	StdDev	Min	Max	Length		Exp 2020-01-30	deltaBLM_STB_ICRF 0.5uM_TOP3A-PICH.czi			Area	Mean	StdDev	Min	Max	Length
	Background	PICH	1	0.2	3405.8	198.5	3087	3824	3.1					1	0.3	3995.3	247.6	3617.2	4401.9	4.8
	Background	TOP3A	2	0.2	3905.5	218.2	3588.2	4444.7	3.1					2	0.3	4508.5	505.7	3953.2	6674.2	4.8
			3	0.2	7163.1	814.6	5610.5	9082.1	3.6					3	0.1	6930.5	450.4	5913	7549.3	1.5
			4	0.2	4776.4	481.7	3860	5829.2	3.6					4	0.1	4504.1	143.3	4239.3	4669.3	1.5
			5	0.2	7172.2	810.1	5805.6	8709.2	2.3					5	0.2	10802.8	1328.8	6892.8	12175	2.4
			6	0.2	4968.1	565.4	4275.7	6132.6	2.3					6	0.2	5135.8	434.2	4641.5	6356.8	2.4
			7	0.1	6780.6	471.8	5983.8	7497.2	2.1					7	0.1	10865.6	1166.9	7944	12291.2	1.4
			8	0.1	5196.8	305.5	4561	5718.5	2.1					8	0.1	5531.8	356	5017.5	6419	1.4
			9	0.2	7140.3	671.7	5537.6	8306.6	2.7					9	0.2	9804	1408.3	7295	11983.9	3.3
			10	0.2	5391.3	511.3	4441.1	6227.4	2.7					10	0.2	5121.8	442.5	4472	5847.5	3.3
			11	0.6	6297.9	823	4436.4	8683.3	9.1					11	0.1	10161.1	1001.3	7795.7	11657.1	2.1
			12	0.6	4747.1	616.9	3687.7	6613	9.1					12	0.1	5851.9	737.9	4675.8	6988.8	2.1
			13	0.1	6690.9	341.6	6211.5	7488.6	2.2					13	0.1	11389.3	843.5	9083	12347.2	1.4
			14	0.1	4967.2	233.5	4545.2	5443.5	2.2					14	0.1	5650.8	263.2	5413.8	6271	1.4
	HAP1_STB_ICRF 0.5uM_TOP3A-PICH-03.czi													15	0.1	11862.1	974.5	9582	13417.6	2.1
			1	0.4	2485.2	155.8	2204.5	2868.3	6.6					16	0.1	5491.7	539.5	4514.5	6202.9	2.1
			2	0.4	3932.9	241.4	3575.3	4843.1	6.6					17	0.2	11043.1	1427.5	7443	12689	2.3
			3	0.3	3740.8	344.2	3187.6	4899.4	4.8					18	0.2	5233.6	448.2	4239	5766.9	2.3
			4	0.3	4334.2	348.4	3572.2	5144.1	4.8					19	0.2	11974.2	1598.4	8359.1	13869.8	2.3
			5	0.2	3890.8	332.8	3311.5	5134.3	3.4					20	0.2	5106.9	293	4685	5677.8	2.3
			6	0.2	4389.7	323.9	3614	5207.6	3.4					21	0.3	9702.7	1493.2	6654.2	12251.2	4.3
			7	0.3	4098	252.3	3587.2	4475	4.1					22	0.3	4900.9	404.9	4235.6	5816.3	4.3
			8	0.3	4291.5	245	3793.5	4761.6	4.1					23	0.3	8502	1016.9	6438.2	10172.5	4.4
			9	0.5	4259.4	634.3	3307	6126.6	7					24	0.3	4508.7	219.5	4166	5100.1	4.4
			10	0.5	4685.6	473.8	3936	5801.7	7					25	0.2	7617.3	542.7	6469.5	8759	2.4
			11	0.5	4843.1	587.2	3949.4	5961.2	7					26	0.2	4619.1	260.1	4346.1	5429.5	2.4
			12	0.5	5171.8	719.6	3967.6	6822.8	7			deltaBLM_STB_ICRF 0.5uM_TOP3A-PICH-02.czi
			13	0.3	4872.6	538.6	3781.7	5582.5	4.3					1	0.5	3291.1	278.9	2847.6	3726.6	7
			14	0.3	5688.2	629.7	4097.7	7072.6	4.3					2	0.5	3952.8	385.5	3474.9	5151.6	7
			15	0.5	5789.2	1492.2	3095.4	9416.2	8.3					3	0.4	7908.2	1044.8	6183.2	10369.2	5.9
			16	0.5	5600.8	1238.9	3629.6	8093.9	8.3					4	0.4	3990.8	337.1	3369.1	5131.7	5.9
			17	0.2	6197	433.3	5548.5	6953.9	3.5					5	0.2	6483.1	762.3	5258.3	7916.8	3.4
			18	0.2	5817	485.8	4758	6603.9	3.5					6	0.2	3830	200.4	3310.8	4153.3	3.4
			19	0.2	6308.4	424	5685.8	7428.1	3.6					7	0.4	8267.7	785.8	6463.6	9675.3	5.5
			20	0.2	5323.8	290.5	4710.9	5792.2	3.6					8	0.4	3989.3	371.5	3410.7	4985.1	5.5
			21	0.4	6216.6	1019.4	4121.2	8187.7	6					9	0.2	8701.5	730	7429	10165.1	3.2
			22	0.4	5321.2	729.2	3763	6769.7	6					10	0.2	4036.3	435.1	3474	5064.4	3.2
			23	0.4	5778.9	1051.6	3697	8397.7	6.5					11	0.2	10444.3	2353.6	6582	13621.8	3.2
			24	0.4	5408.1	711.9	4041	6831.8	6.5					12	0.2	3847.7	375.5	3276.2	4644.9	3.2
			25	0.3	4699.6	401.2	3886	5480.9	5.3					13	0.3	9248.3	1550.9	6377.5	12229.2	4.8
			26	0.3	4913.9	384.1	4064.2	5730.7	5.3					14	0.3	3877.4	457	3258.5	4952.7	4.8
			27	0.4	4089.5	632.9	3061.4	5322.7	6.5					15	0.3	10613.5	2597.2	6523.2	15561.9	4.5
			28	0.4	4859.9	775.2	3339.5	6799.7	6.5					16	0.3	3990.2	496.2	3130	5189.9	4.5
			29	0.4	4386.7	671.6	3083.3	5995.3	6.1					17	0.2	9783.8	1489.3	7181.5	12972.2	2.5
			30	0.4	4730.5	618.9	3899.6	6417.3	6.1					18	0.2	4137.2	252	3644.5	4626.3	2.5
			31	0.2	4537.2	557.8	3531.3	5655.7	3.6					19	0.2	9663	1976.2	5811.7	12516.5	3.6
			32	0.2	4642	310.7	4051.8	5221.9	3.6					20	0.2	3548	181.9	3307.1	4288.7	3.6
	HAP1_STB_ICRF 0.5uM_TOP3A-PICH-04.czi													21	0.1	8442.6	739.5	7172.5	9556.6	2
			1	0.4	3809.5	293	3186.8	4448.8	6.2					22	0.1	3631.7	160.5	3459.4	3973.2	2
			2	0.4	4536.8	310.7	4033.2	5098.9	6.2					23	0.1	9002.9	661.7	7091.5	9705.5	1.5
			3	0.2	6494.6	578.9	5128	7446.6	2.8					24	0.1	3649	110.4	3498.7	3889.9	1.5
			4	0.2	5894.7	563.3	5235.4	7371.9	2.8					25	0.3	7757.6	866.5	5793	9551	4.1
			5	0.1	6199	675.2	4744.1	7002.2	1					26	0.3	3768.6	266.1	3398.5	4425.1	4.1
			6	0.1	4476.1	300.5	4211.2	5081.5	1			deltaBLM_STB_ICRF 0.5uM_TOP3A-PICH-03.czi
			7	0.1	6965.5	261.9	6427.6	7402.2	1.8					1	0.5	1578.8	97.5	1371.8	1928.6	7.2
			8	0.1	6108.1	168.9	5821.6	6503.6	1.8					2	0.5	3398.1	257.5	2994.2	4066.8	7.2
			9	0.2	7559.2	628.1	6606.7	10168	3.6					3	0.2	2835.9	390.2	2287.7	3750.2	3.1
			10	0.2	6145	403	5169.6	6719	3.6					4	0.2	3130.8	157	2903.5	3500.7	3.1
			11	0.3	8609.3	534.6	7294.7	9798.7	4.8					5	0.2	3605.5	664.4	2417	5101.9	3.1
			12	0.3	6140.5	549.6	5364.3	7537.7	4.8					6	0.2	3588.5	338.4	3194	4586.4	3.1
			13	0.5	7635.1	565.7	6442.9	8851.2	7.6					7	0.4	3662.7	340.6	3030	4758	6.6
			14	0.5	5898.2	625.6	4394.8	7239.7	7.6					8	0.4	3457.5	261.7	3071	4286.5	6.6
			15	0.4	8343.8	770.9	6933.3	9836	5.7					9	0.2	4545.3	466.5	3538.3	5364.6	2.7
			16	0.4	5718.4	646.9	4280	6873.3	5.7					10	0.2	3727.7	198	3415.7	4134.9	2.7
			17	0.3	8339.7	936.9	6391.9	10023.7	4.8					11	0.2	4670.3	305.2	3860	5204.7	3.4
			18	0.3	6228	495.8	5199.2	7830.5	4.8					12	0.2	3787.1	336	3276.5	4320.8	3.4
			19	0.3	7691.2	582.1	6812.3	9484.1	4.3					13	0.3	4494.3	481.3	3285.4	5185.7	5.1
			20	0.3	5670.3	395.8	4809.5	6476.9	4.3					14	0.3	3576.6	252.4	3012.8	4150.4	5.1
			21	0.2	8522.3	996	7034	9779.8	2.8					15	0.3	3774	554.4	2760	4983.8	4.1
			22	0.2	5713.2	315.5	5248.4	6538.5	2.8					16	0.3	3480.8	190.2	3078	3900	4.1
			23	0.4	7749.2	718.3	6014.6	9686.7	6.4					17	0.2	3244.8	333.8	2683.6	3953.3	3.2
			24	0.4	5445.7	532.6	4471.5	6521.5	6.4					18	0.2	3330.7	210.6	3084	4061	3.2
			25	0.3	8243.7	1158.2	6545.7	10597	5.1					19	0.2	2930.3	245.6	2622.1	3725.8	2.9
			26	0.3	5461.4	590.3	4548.5	6801.1	5.1					20	0.2	3158.7	378.3	2833.5	4473.7	2.9
			27	0.3	7741.4	777.4	6338.5	9069	4.9					21	0.1	2929.3	301.6	2433.9	3412	1.9
			28	0.3	5313.2	497	4371.1	6418.3	4.9					22	0.1	2890.1	67.9	2786.9	3102.2	1.9
			29	0.1	8516	941.9	7107.1	10670	2.2			deltaBLM_STB_ICRF 0.5uM_TOP3A-PICH-04.czi
			30	0.1	5219.4	338.5	4769.7	6085.4	2.2					1	1.1	2197.1	95.1	1963.8	2498.6	17.2
			31	0.6	7795.4	1008.8	6047	10061.9	10.1					2	1.1	3600.4	406.6	2920.4	5300.3	17.2
			32	0.6	5652.1	749	4116.5	7949.4	10.1					3	0.4	6531.2	958.7	4046.8	7711.1	6.9
	HAP1_STB_ICRF 0.5uM_TOP3A-PICH-05.czi													4	0.4	3428.5	232	2901.5	4066.8	6.9
			1	0.4	3573.2	160.3	3263	3969.4	5.6					5	0.2	4904.7	323.4	4286.4	5524.6	2.9
			2	0.4	5251.4	264.5	4850	6205.8	5.6					6	0.2	3686.9	381.7	3346	5019.9	2.9
			3	0.7	5254.7	1388.7	3527.2	10815	10					7	0.4	7118.1	1086.6	5430.2	9646.1	6.3
			4	0.7	7055.6	554	5865.3	8325.7	10					8	0.4	3565	258	3019.1	4218.1	6.3
	HAP1_STB_ICRF 0.5uM_TOP3A-PICH-06.czi													9	0.3	6498.3	943.4	4455	7877.8	4.1
			1	0.6	3762.7	431.4	3084.3	4805	8.8					10	0.3	3833.4	576.3	2968.8	5233	4.1
			2	0.6	4850	475.2	4017	5970.4	8.8					11	0.2	11626.3	1201.4	7963	13622.2	2.4
			3	0.1	6628	832.1	4717.5	8050.4	1.9					12	0.2	3964.8	269.9	3497.4	4431.5	2.4
			4	0.1	5720	427.7	5249.3	6681.2	1.9					13	0.4	7703.4	1690.1	4528.4	10457.1	6.3
			5	0.2	7192.7	1010.2	5555.6	9141.3	3.8					14	0.4	3646.2	349.2	3116	5244.5	6.3
			6	0.2	7086.5	534.6	6210.4	8596.7	3.8					15	0.2	7553	572.2	6485	8610.3	2.9
			7	0.3	8746.1	1006.1	7187.9	10863	4.5					16	0.2	3680.1	262.1	3367.7	4446.3	2.9
			8	0.3	7378.6	754.8	6069.3	9027.6	4.5					17	0.3	7527.8	1396.6	4426.7	9414.7	5.1
			9	0.3	7760.9	1222	5976.1	10879.4	5.3					18	0.3	3563.1	328	3247.9	4887.5	5.1
			10	0.3	6862.9	839.7	5229	8751.5	5.3					19	0.3	7589.5	1411.3	4833	9983	5.2
			11	0.4	8055.7	908.6	6031	10316.2	6.4					20	0.3	3516.4	279.7	3183.4	4503.9	5.2
			12	0.4	6558.4	517	5124.3	7553	6.4					21	0.5	6659.4	1851	4009.8	10024.8	7.2
			13	0.6	7979.6	955.6	6413.1	10429.1	8.8					22	0.5	3443	410	2940.1	4781.7	7.2
			14	0.6	6607.3	775.5	4976.6	9309.5	8.8					23	0.1	7960.4	572.1	7173.5	9162.2	1.5
			15	0.1	9358.4	1451.7	6461.5	11136	1.7					24	0.1	3936	415.4	3517.8	4790.8	1.5
			16	0.1	7312.7	370.7	6544	8076	1.7					25	0.4	5769.2	1654.2	3545.4	9905.1	6.2
	HAP1_STB_ICRF 0.5uM_TOP3A-PICH-07.czi													26	0.4	3476	211	3193.7	4250.1	6.2
			1	0.3	3622.6	96.2	3432.4	3844.8	5.2			deltaBLM_STB_ICRF 0.5uM_TOP3A-PICH-05.czi
			2	0.3	4122.4	280.7	3682.9	4752.4	5.2					1	0.2	2860.5	184.6	2573.7	3319.2	3.7
			3	0.7	6216.2	622.7	5128.3	8250.6	10.4					2	0.2	4002	200.2	3705.3	4550.3	3.7
			4	0.7	5601.9	799.9	3859.1	6903.9	10.4					3	0.1	4858.3	587.8	3962	6071.7	1.5
			5	0.6	6066.5	677	4944	7995.3	9.5					4	0.1	3708.9	105.1	3539.4	3908	1.5
			6	0.6	5746.2	852.2	4239.4	7453.2	9.5					5	0.4	5436.9	525.3	4240.3	6430.5	5.6
			7	0.4	6104.6	627.7	4996.4	7295.7	5.7					6	0.4	4666.9	497.9	3928.3	6090.3	5.6
			8	0.4	5760.8	409.1	4580.8	6399.1	5.7					7	0.7	6155.6	623.9	4583.6	7623.1	10.6
	HAP1_STB_ICRF 0.5uM_TOP3A-PICH-09.czi													8	0.7	4752	408.1	3727.5	5530.5	10.6
			1	0.6	1968.8	165.2	1672.5	2399.9	9.4					9	0.7	5255.1	621.7	3894.3	6988	10.1
			2	0.6	2890.5	133.6	2572.7	3309.1	9.4					10	0.7	4778.9	454.8	3792.6	6236.2	10.1
			3	0.2	2829.4	421.6	2397.4	3724.1	2.3					11	0.2	5116.3	387.6	4693.3	6075	2.3
			4	0.2	3393.8	141.5	3075.6	3687.6	2.3					12	0.2	4943	206.9	4636.9	5466.5	2.3
			5	0.4	3022.4	292.1	2527.6	3742	6.3			deltaBLM_STB_ICRF 0.5uM_TOP3A-PICH-06.czi
			6	0.4	3649.3	392.2	2985.6	4647.4	6.3					1	0.4	1790.8	82.1	1543.4	1964.9	6.3
			7	0.6	3245.9	410.9	2580.4	4443.2	9.9					2	0.4	3671.4	376.6	3170.7	5089.6	6.3
			8	0.6	3910.8	479.7	2981.3	4936.7	9.9					3	0.4	3955.7	426.9	2687.5	4964.2	6.1
			9	0.1	3632.2	601	2881.5	4694.9	1.5					4	0.4	3394.5	258.8	3016.3	3985.2	6.1
			10	0.1	4691.2	297.3	4331.6	5223.9	1.5					5	0.2	4575.2	553.1	2924.2	5609.1	3.6
			11	0.2	4409	339.3	3768.3	5102	2.7					6	0.2	3710.7	255.6	3254	4258.7	3.6
			12	0.2	5024.9	526.1	4090.4	6169.5	2.7					7	0.2	4399.5	307.2	3728.4	5259.7	2.9
			13	0.2	3107.8	244.1	2792.6	3663.1	2.7					8	0.2	3762.2	111.3	3507	4029.1	2.9
			14	0.2	4440.8	336	3718.5	5028.4	2.7					9	0.4	4462.7	537.8	3334.6	5358.9	6.3
			15	0.1	2964.3	484.2	2487.9	4350.5	1.8					10	0.4	3622.8	294.7	3134	4375.3	6.3
			16	0.1	4205.6	398.3	3612.5	5087	1.8					11	0.4	5274.4	1007.9	2919.5	6485.8	5.3
			17	0.1	3532.1	758.6	2443.2	5033.7	1.9					12	0.4	3751.5	395.8	3190.3	5022.3	5.3
			18	0.1	3800.9	156.8	3549	4128.5	1.9					13	0.4	4919.1	620.5	3618.5	6069.8	5.6
			19	0.1	2908.6	278.8	2284.1	3412.9	1.5					14	0.4	3593.4	250.7	3219.1	4186	5.6
			20	0.1	3267.2	69.3	3129.8	3379.2	1.5					15	0.2	6184.9	552.3	5133.7	7004	3.7
	HAP1_STB_ICRF 0.5uM_TOP3A-PICH-10.czi													16	0.2	3950.4	387.4	3582.2	5434.8	3.7
			1	0.3	3262.1	166.5	3008.7	3909.8	5.3					17	0.3	6101.6	1012.7	3971	8175.5	4.6
			2	0.3	3743.5	171.7	3459.4	4350.9	5.3					18	0.3	3827.4	319.2	3214	4519.9	4.6
			3	0.1	7136.5	747.1	5095.2	8163.3	2					19	0.1	6439.9	974.6	4795.5	8120.8	2.1
			4	0.1	4602.5	265.4	4255.7	5082.5	2					20	0.1	3672.4	143.2	3358.2	3905.7	2.1
			5	0.1	6273.3	610.9	5155.5	7738	2					21	0.2	3322	300	2753.1	3866.6	3.7
			6	0.1	5435	293.7	5148.2	6281.6	2					22	0.2	3699.2	408.4	3185.8	4629.4	3.7
			7	0.1	6844.1	1408.3	5558	9743	1.2			deltaBLM_STB_ICRF 0.5uM_TOP3A-PICH-07.czi
			8	0.1	6250	1581.4	4571	9233.7	1.2					1	0.6	4511.7	179.4	4148.3	4977.6	9.6
			9	0.1	5785.4	1098	4567.9	8705.7	2.2					2	0.6	5763.1	797.1	4691.8	9185.6	9.6
			10	0.1	5209.4	384.8	4401.7	6017	2.2					3	0.3	8215.6	753.1	6552.5	9783.4	5.1
			11	0.3	5537.4	683.4	4468.2	6903.2	3.9					4	0.3	6286	236.2	5810.6	6757.9	5.1
			12	0.3	5667.1	358.3	4598	6280.2	3.9					5	0.5	8451.9	691.7	6357.2	10322.5	7.5
			13	0.1	5701.8	782.1	4411.6	6698.2	1.1					6	0.5	6356.1	553.9	4775	7212.3	7.5
			14	0.1	5764.4	448.8	4955.4	6336.5	1.1					7	0.2	8408.7	714.2	7157.3	10398	3.7
			15	0.1	5928.1	993.6	4267	7230.2	1					8	0.2	6349.3	434	5825.5	7606.1	3.7
			16	0.1	5699.2	431.2	5003	6486.8	1					9	0.4	9032.3	1573.3	6439	12069.5	6.3
			17	0.3	4723	463.2	3919.5	5912	3.9					10	0.4	6068.3	690.6	4893	7858	6.3
			18	0.3	6016.3	493	4880	6981	3.9					11	0.2	11128.3	1410.9	8107	13166	3.3
			19	0.2	7589	708.3	6129.5	8643.8	2.6					12	0.2	6338.9	749.4	5318	8168	3.3
			20	0.2	5041.9	194	4639	5443.5	2.6					13	0.4	10319.1	1752.3	7727.7	14849.3	5.5
			21	0.3	5537.6	818.4	3937.1	7367	4.1					14	0.4	5578.7	432.9	4836.5	6675	5.5
			22	0.3	5164.2	410.4	4379.8	5894.6	4.1					15	0.2	11611.6	1676.2	8337.4	14973.3	2.3
	HAP1_STB_ICRF 0.5uM_TOP3A-PICH-11.czi													16	0.2	5752.4	293.5	5205.9	6224.8	2.3
			1	0.5	1858.8	229.5	1490.7	2324.6	7.3					17	0.4	8965.5	883.6	7479.5	10692.8	5.8
			2	0.5	5280.9	148.8	4882.3	5813.5	7.3					18	0.4	5655	515.8	4736.4	7477	5.8
			3	0.1	3486.6	286.5	2921.7	4148	1.7					19	0.3	7641.6	852.5	5853.1	9138.4	4.8
			4	0.1	5858.1	102.3	5650.6	6089.7	1.7					20	0.3	5270.4	275.9	4734	5884.8	4.8
			5	0.1	3998.3	312.1	3362	4642.9	1.5					21	0.2	7796.4	1067.5	6334.4	9668.4	2.8
			6	0.1	6405.5	281.7	5948.3	6762.9	1.5					22	0.2	5021.2	76.3	4897.5	5180.3	2.8
			7	0.3	3051.8	262.6	2415	3706.1	4					23	0.3	6729.4	567.3	5030	7448.3	5.1
			8	0.3	6714.8	417.8	5942	7690.4	4					24	0.3	5514.6	422.5	4408.5	6347.5	5.1
			9	0.3	3100.6	445.5	2602	4303.8	5			deltaBLM_STB_ICRF 0.5uM_TOP3A-PICH-09.czi
			10	0.3	6071.7	290.1	5551.4	6770.9	5					1	5.2	1224.6	155.6	870.4	1882.6	80.1
			11	0.5	2916.1	236.2	2468.9	3530.9	7					2	5.2	2135.7	395.5	1494	5261.4	80.1
			12	0.5	6196.3	533.2	5402.2	8001.8	7					3	0.2	2501.2	363.1	2073.3	3319.8	2.3
			13	0.4	2933	258	2452.3	3605.7	6.8					4	0.2	2122.8	276.9	1736.9	2633.2	2.3
			14	0.4	6038.9	346.4	5478.8	6926.7	6.8					5	0.4	4197	604.9	2578.7	5143.2	5.5
			15	0.3	3337.7	513.9	2725.6	5041	4.8					6	0.4	2025.3	245.7	1741.3	2711.5	5.5
			16	0.3	6229.8	396	5627.4	7040.4	4.8					7	0.4	4652.7	1362.5	2334.9	7465.1	6.3
			17	0.3	3361.7	302.2	2863.4	3998.6	4.2					8	0.4	1951.6	213.2	1657.4	2575.1	6.3
			18	0.3	6014.9	245	5601.4	6624.3	4.2					9	0.3	5236.8	1196.2	3266.9	7683.6	5
			19	0.2	3348	377.2	2618.6	4233	2.8					10	0.3	2137.2	381.4	1609.3	3448.5	5
			20	0.2	5913	153.9	5611.3	6254.6	2.8					11	0.4	5488.1	968.4	4089	7636.3	5.9
			21	0.3	3728.8	492.8	2892.6	5037.8	5.2					12	0.4	2315.8	440.2	1731.1	3527.4	5.9
			22	0.3	6557.2	419.4	5805.1	7499.1	5.2					13	0.1	6325.1	875.8	4812.1	8099.5	2
	HAP1_STB_ICRF 0.5uM_TOP3A-PICH-12.czi													14	0.1	2204.6	255	1846.2	2744.3	2
			1	0.1	2983.5	254.8	2497.2	3306.3	2.2					15	0.3	5051.2	1182.7	2790.4	7282.6	5.1
			2	0.1	3026.5	84.1	2917.4	3251.1	2.2					16	0.3	2174.4	203	1831.5	2633.8	5.1
			3	0.2	4290.1	417.2	3581.2	4848.6	2.4					17	0.5	4459.3	1163.1	2529.2	6493.6	8.3
			4	0.2	3550.6	169	3290.2	3900.6	2.4					18	0.5	2195	328.9	1747.4	3502.1	8.3
			5	0.2	6888.5	978.6	4945.2	8150.3	3					19	0.5	4800.5	818.9	3094.8	6093	8.1
			6	0.2	4935	620.4	4071.2	6518.5	3					20	0.5	2251.8	324.1	1790	3662.4	8.1
			7	0.2	6416.4	812	4658.1	7458.5	3					21	0.5	4021.2	865.3	2552.3	5875.6	7
			8	0.2	4747.7	403.9	3904.1	5538.3	3					22	0.5	2138.6	216.3	1771.7	3096.1	7
			9	0.2	5003.9	315.5	4564.1	5809.7	2.7					23	0.2	3690.2	447.7	2790.1	4556.2	3.3
			10	0.2	3979.9	286.3	3482.1	4829	2.7					24	0.2	2033.7	157.7	1779.2	2375	3.3
			11	0.3	5228.1	391.8	4615.5	6107.7	4.3			deltaBLM_STB_ICRF 0.5uM_TOP3A-PICH-10.czi
			12	0.3	3979.6	291.5	3446.7	4711.4	4.3					1	0.4	4174.1	259.9	3562.6	4651.3	6
			13	0.3	5407.1	636.4	4364.3	6349	4.9					2	0.4	4468.5	428.5	3903.8	6022.7	6
			14	0.3	4482	426.1	3511.1	5472.8	4.9					3	0.2	7288.5	700.1	5691.2	8485.1	2.5
			15	0.3	6276.4	895.2	4511.8	7978.8	4					4	0.2	3662.4	192.1	3387.6	4130.5	2.5
			16	0.3	4450.4	488.1	3588	5447.9	4					5	0.3	10298.1	1654.9	6067.5	13271.1	4.6
			17	0.2	6377.1	760.8	4576.3	7660.4	3.6					6	0.3	4144.4	295.3	3559.7	4680.4	4.6
			18	0.2	4492.9	331.9	3876.7	5214.6	3.6					7	0.3	7769.8	1744.8	4694.4	9817.2	4.8
			19	0.2	5679	1004.1	4378.8	7300.5	2.9					8	0.3	3921.6	186.2	3694.2	4544.1	4.8
			20	0.2	4433.9	280.9	3926.9	5338.9	2.9					9	0.3	9463.7	1469.7	5804	11339.4	4.1
			21	0.2	6013.6	701.4	4420.5	7432.6	3.5					10	0.3	4454.2	494.6	3938.3	6395.5	4.1
			22	0.2	4240.7	236.1	3734.4	4822	3.5					11	0.3	10895.4	2089.9	7607.8	15150.3	4.2
			23	0.2	5281.7	610.7	4396.5	6543	3					12	0.3	4206.4	187	3960.6	4948.6	4.2
			24	0.2	4215.7	388.5	3704.1	5255.9	3					13	0.4	8924.5	874.7	7243.7	10475.7	6
			25	0.3	4951.1	416.1	4151.6	5981.8	5.1					14	0.4	4171.6	260.2	3632	4716.2	6
			26	0.3	4064.7	323.3	3458.5	5005.5	5.1					15	0.3	11517.3	1769.8	6869.8	14248.7	5
			27	0.3	4587.3	583.8	3589.7	5946.7	5.1					16	0.3	4653.2	529.4	3740	6681.3	5
			28	0.3	3925	439.2	3249.1	4909.8	5.1					17	0.3	11782.4	1440.5	9546	15400.3	3.9
			29	0.4	4371.6	830.2	2808	6219.6	6.8					18	0.3	4579.3	470.8	4003.6	6157.2	3.9
			30	0.4	3539	276.8	3012.5	4027.6	6.8					19	0.3	11688.7	1616.7	7588	13917.5	5
	HAP1_STB_ICRF 0.5uM_TOP3A-PICH-13.czi													20	0.3	4614.6	483.5	3863.8	5826	5
			1	0.9	3016.5	241.3	2505.2	3588.6	14.1					21	0.3	13123.1	1499.7	8394	15564	4.5
			2	0.9	4273.2	233.4	3815	5140.4	14.1					22	0.3	4454.1	479.7	3738.9	5747.5	4.5
			3	0.2	5007.2	567.8	3963.4	6112.2	3.8					23	0.3	8949	2140.1	5699.7	14578.9	5.2
			4	0.2	5580	452.6	4951.1	6514	3.8					24	0.3	4089.5	333.8	3643.6	5051.8	5.2
			5	0.3	5683	820.9	4257.8	7992.4	4.4					25	0.4	7442.8	1330.9	5278.3	9470.8	5.6
			6	0.3	6212.5	292.5	5471.1	6760.9	4.4					26	0.4	3851.7	200.8	3520.4	4346.7	5.6
			7	0.3	4394.2	338	3837.7	5265	4.9		Exp 2020-02-04	deltaBLM_STB_ICRF 0.5uM_TOP3A-PICH-02.czi
			8	0.3	6083.8	620	5869	9046.3	4.9					1	0.8	779.4	56.8	658.6	1003.1	12.4
			9	0.2	5215.1	577.6	4281	6182.3	2.6					2	0.8	2016.3	196.8	1794	2907.3	12.4
			10	0.2	5233.7	441.2	4542.7	6046.1	2.6					3	0.4	1531.2	223.9	1124.5	2006.5	5.7
			11	0.6	4922.8	454.8	4080.8	5948.1	9.3					4	0.4	2072.5	76.9	1922.8	2359.1	5.7
			12	0.6	6385.3	600.8	4948.3	7691.5	9.3					5	0.4	2449.3	561.7	1427	3561	6.5
			13	0.1	4428.5	403.7	3811.5	5176.7	2.2					6	0.4	2188.6	158	1957.4	2658.7	6.5
			14	0.1	4608.4	240	4193.5	5074.5	2.2					7	0.2	3239.4	465.4	2342.6	3948.3	3
Exp 2020-02-04	HAP1_STB_ICRF 0.5uM_TOP3A-PICH.czi													8	0.2	2376.8	265.5	2159.6	3229.2	3
			1	0.2	4005.1	68.4	3817.8	4132.4	2.8					9	0.3	2645.7	516.9	1778.1	4091.6	4.6
			2	0.2	4209.4	117.4	4038	4570.6	2.8					10	0.3	2277.8	226.7	1981.4	3087.7	4.6
			3	0.3	5369.7	443.1	4562.5	6489.7	4.7					11	0.1	3024.7	205	2638.2	3383.7	2
			4	0.3	5680.7	699.8	4593	7259.2	4.7					12	0.1	2405	170.5	2222.2	2890	2
			5	0.2	6730.9	1142.1	5300	9275.7	2.8					13	0.1	3501.3	415.9	2581	4259.5	1.8
			6	0.2	6259	504.8	5237	7439.7	2.8					14	0.1	2409	73.6	2276	2511.8	1.8
	HAP1_STB_ICRF 0.5uM_TOP3A-PICH-03.czi													15	0.3	3195.4	630.5	2063.7	4565.1	4.4
			1	0.3	3511.9	294.5	3036.6	4064.2	4.2					16	0.3	2554.3	327.9	2175.4	3633.4	4.4
			2	0.3	3106.3	49.9	3033.8	3240.7	4.2					17	0.2	4828.3	902.6	3174.6	6341	2.9
			3	0.1	5714.6	341	4881	6176.3	1.6					18	0.2	2537.3	141.2	2277.2	2809.9	2.9
			4	0.1	3430.1	179.9	3250.3	3859.1	1.6					19	0.3	3377.4	538.2	2401.2	4480.3	4.2
			5	0.1	6931.4	496.9	5936.4	7757.5	1.9					20	0.3	2433.6	123.1	2187	2710.2	4.2
			6	0.1	4112.2	355.3	3636.7	4727.4	1.9					21	0.3	2166.2	451.7	1427.5	3045.1	5.1
			7	0.1	6049.3	857.4	4973.4	7654.1	1.4					22	0.3	2309.9	231.2	2076.6	3126.3	5.1
			8	0.1	4242.7	293.2	3610.2	4637.2	1.4					23	0.2	1642.2	251.3	1209.4	2171	2.6
			9	0.3	6837.6	878.2	5404.4	9195.1	4.4					24	0.2	2195.6	176.5	2020.6	2759.7	2.6
			10	0.3	4562.5	317	4122.8	5280.8	4.4					25	0.2	4587.3	998.1	2917.6	6440.8	3.5
			11	0.2	5847.7	449	4978.9	6977	3.5					26	0.2	2578.3	171	2272.7	3032.3	3.5
			12	0.2	3755	179.1	3523.1	4189	3.5			deltaBLM_STB_ICRF 0.5uM_TOP3A-PICH-03.czi
			13	0.3	6887.5	726.4	5495.4	8256.1	3.9					1	0.4	1121.2	69	1019.6	1316.9	5.9
			14	0.3	4161.7	463.7	3580.8	5765.7	3.9					2	0.4	2299.4	364	1948.2	3877.9	5.9
			15	0.2	7409.2	529.7	6077.8	7992.9	2.3					3	0.5	3410.9	631.5	2475.1	4925.6	7.5
			16	0.2	4047.9	282.7	3556.2	4487.3	2.3					4	0.5	2657.1	212	2318.1	3428.3	7.5
			17	0.4	7165.5	736	5887.5	9033.6	5.4					5	0.5	3523.4	615.1	2490.8	5247.6	8.3
			18	0.4	4347.4	441.6	3543	5552.7	5.4					6	0.5	2811.3	293.2	2419.6	3971.4	8.3
			19	0.3	6952.6	1032.7	5272.1	9010.1	5.3					7	0.3	3176	594.6	2179.6	4755.8	5.3
			20	0.3	4276	519.7	3383.7	5696	5.3					8	0.3	2743	597.6	2093	4687.5	5.3
			21	0.3	6604.7	891.2	5040.4	8655.3	4.4					9	0.2	3072.9	466.1	2372.1	3919.8	2.8
			22	0.3	4291	322.2	3625.8	4998.8	4.4					10	0.2	2560.9	128.5	2371.8	2838.7	2.8
			23	0.4	4730.7	439.6	3899.1	5672.6	5.6			deltaBLM_STB_ICRF 0.5uM_TOP3A-PICH-04.czi
			24	0.4	3645.2	297.9	3170.6	4394.8	5.6					1	0.3	1225.4	117.4	1028	1553.4	4.8
	HAP1_STB_ICRF 0.5uM_TOP3A-PICH-04.czi													2	0.3	3035.5	389.5	2465.4	4303.2	4.8
			1	0.2	3686.9	131	3421.6	4174.9	3.6					3	0.3	3142.3	448	2162.4	3936.4	4.8
			2	0.2	4520.6	84.9	4249.7	4739.3	3.6					4	0.3	2501.2	217.4	1994.7	3345.1	4.8
			3	0.3	7172.4	616.4	6175.9	8487.6	3.9					5	0.4	2860.9	607.6	1883.4	4617	6.2
			4	0.3	5255.8	272	4765.4	5838.7	3.9					6	0.4	2599.2	404	2031.4	3804	6.2
			5	0.3	7367.1	1185.6	6256.5	10626.3	4.3					7	0.3	2961.6	583.6	1788.7	4467.8	4.9
			6	0.3	5801.8	579.2	4880.5	7272	4.3					8	0.3	2717.6	384.2	2090.6	3729.3	4.9
			7	0.3	5870	870.2	4712.3	8243.4	4.7					9	0.2	2748.9	718	1801.6	5208.7	3.3
			8	0.3	5137.8	576.8	4160.1	6797.7	4.7					10	0.2	2764.3	194.7	2476.4	3189.2	3.3
	HAP1_STB_ICRF 0.5uM_TOP3A-PICH-07.czi											deltaBLM_STB_ICRF 0.5uM_TOP3A-PICH-05.czi
			1	0.2	2339.5	79.3	2226.1	2570.3	2.6					1	0.4	1025.8	135.7	880.7	1576.5	6.4
			2	0.2	2721.6	61.5	2603.2	2871.4	2.6					2	0.4	2271.7	199.6	2083.2	3164.3	6.4
			3	0.1	4309.3	303	3513.5	4768.5	1.3					3	0.4	2745	451.6	1970.4	3719.2	6.4
			4	0.1	3202.4	137.8	3030.5	3449.8	1.3					4	0.4	2181.2	86.3	2030.3	2463.5	6.4
			5	0.2	4935.8	835.7	3835.9	7211.3	3.5					5	0.2	6183.1	751.4	4590	7418.4	2.8
			6	0.2	3579	244.5	3234.9	4303.7	3.5					6	0.2	2288.3	163.1	2077.2	2770.4	2.8
			7	0.5	4869	488.8	3726	6303.6	7.1					7	0.4	5374.3	987.2	3983.8	7809.1	5.4
			8	0.5	4056	340.4	3441.5	5138	7.1					8	0.4	2209.9	217.8	1994.4	3138.6	5.4
			9	0.3	4171	316.6	3647.5	4887	5.1					9	0.4	3543.6	613.2	2506.7	4616.6	6.1
			10	0.3	4121.7	311.9	3727.4	5499.4	5.1					10	0.4	2127.4	245.9	1885.2	3178.4	6.1
			11	0.1	4826	493.9	4345.1	6192.4	2.1					11	0.5	2698.3	489.1	1731.6	3726.7	7.7
			12	0.1	4442.7	298.4	3823.7	5294.6	2.1					12	0.5	2297.4	186.4	2033.5	2763.6	7.7
			13	0.1	4855.6	623	4346	6605.1	2.1			deltaBLM_STB_ICRF 0.5uM_TOP3A-PICH-06.czi
			14	0.1	4574.5	592.1	3987.6	6496.8	2.1					1	0.8	2055.9	104.9	1841.7	2349.1	11.7
			15	0.1	4399.6	408.5	3512.2	5101.6	2.2					2	0.8	4326.9	330.2	3722.6	5350.4	11.7
			16	0.1	3239	142.7	3045.6	3535.4	2.2					3	0.1	4051.9	331.3	3543.9	4596.3	1.6
	HAP1_STB_ICRF 0.5uM_TOP3A-PICH-08.czi													4	0.1	4330.9	204.1	4108.5	4707.2	1.6
			1	0.4	4143.2	193.3	3710.6	4640.6	5.5					5	0.2	4083.5	344.2	3650.5	4902.6	3.8
			2	0.4	4059	165.8	3695.8	4398.8	5.5					6	0.2	4379.9	199.5	4071.3	4995.9	3.8
			3	0.3	5738	491.8	4875.3	7091.5	4.6					7	0.1	4157.4	413	3513	4755.6	2.2
			4	0.3	5072.1	651.6	4121.6	6906.2	4.6					8	0.1	4601.1	323.8	4227.1	5138.6	2.2
			5	0.4	7146.9	685.5	5860.1	8526.9	5.8					9	0.6	4315.7	554.6	2840	5934.1	9.9
			6	0.4	4992	423.9	4028.4	5647.6	5.8					10	0.6	4577.6	441.3	3770.5	6084.7	9.9
			7	0.3	6541.4	798.5	5829.5	9661.2	5.1					11	0.4	4137.8	319.5	3577.2	4965.6	6.1
			8	0.3	4941.5	535.2	3944	6614.5	5.1					12	0.4	4769.9	273.4	4315.5	5696.2	6.1
			9	0.3	5709	823.1	4922.8	8481.6	4.3					13	0.2	4183.1	564.4	3209.3	5657.4	3.4
			10	0.3	5133.7	312.9	4487.9	5876.9	4.3					14	0.2	4768.8	652.2	3948.2	6234.4	3.4
			11	0.4	5684.9	579.4	4787.7	7051.4	6			deltaBLM_STB_ICRF 0.5uM_TOP3A-PICH-10.czi
			12	0.4	4748.6	595.2	3817	6596.8	6					1	0.5	725.4	36.4	664.6	838.9	7.2
			13	0.1	5661.1	477.4	5121.2	6517.9	0.9					2	0.5	2228.5	286.2	1861.4	3285.9	7.2
			14	0.1	4778.1	463	3943.5	5351.4	0.9					3	0.3	1635.5	281.4	1123.9	2119	4.3
			15	0.1	5363.6	438.4	4705.2	6386.2	1.9					4	0.3	2115.3	406.7	1859.8	3949.9	4.3
			16	0.1	4623.3	374.8	4081.5	5581.3	1.9					5	0.3	1558.8	211.8	1147.4	2073.8	4.4
			17	0.1	5168.4	443.9	4656.3	6246.4	2.2					6	0.3	2030.1	188.8	1805.8	2836.4	4.4
			18	0.1	4554.9	297.1	4062	5066.9	2.2					7	0.5	1971.3	318.1	1442.9	2824.9	7.3
	HAP1_STB_ICRF 0.5uM_TOP3A-PICH-09.czi													8	0.5	2185.2	333	1831.8	3648.1	7.3
			1	0.4	3977	277.2	3442	4421.6	6.7					9	0.1	2418.3	319.5	2123.6	3185.4	1.1
			2	0.4	3871.5	185.6	3469.8	4204.9	6.7					10	0.1	1935.7	28.5	1884	1980.4	1.1
			3	0.1	5064.9	240	4557.5	5733	1.7					11	0.2	2054.4	689.8	1362.3	3687.3	2.6
			4	0.1	4402.3	328.1	4043.4	5121.9	1.7					12	0.2	2026.9	65.3	1898.8	2147.1	2.6
			5	0.1	6225	421.6	5213.1	7127	2.1					13	0.6	1764.4	492.3	1045.2	3611.1	8.6
			6	0.1	4581.1	134.3	4348.6	4886	2.1					14	0.6	2029.3	218.6	1753.1	3068.4	8.6
			7	0.5	4922.4	590.6	4020.9	6722.9	7.5					15	0.1	2439.9	336.2	1830.6	3069.1	2.1
			8	0.5	4858.5	351.7	4075.4	5647.9	7.5					16	0.1	2000.4	61.2	1931.9	2187.5	2.1
			9	0.1	5447.3	207	4999.2	5943.4	1.2			deltaBLM_STB_ICRF 0.5uM_TOP3A-PICH-12.czi
			10	0.1	4976.8	130	4764.5	5237	1.2					1	1.1	1735.8	123.4	1527	2123.9	17.2
			11	0.1	5899.8	558.9	5153.4	6812.1	2.1					2	1.1	3058.6	371.7	2669.9	4719	17.2
			12	0.1	4412.4	284.7	3949.3	4892.4	2.1					3	0.5	4835.7	821.9	3142.4	6544.8	7.9
			13	0.2	5192.5	422.9	4507.2	5947.7	2.3					4	0.5	3079.6	200.7	2809.7	3641.1	7.9
			14	0.2	4438	474.4	3850.4	5370.2	2.3					5	0.2	4605.7	700.7	3528	5843.1	2.4
	HAP1_STB_ICRF 0.5uM_TOP3A-PICH-10.czi													6	0.2	3197.1	245.6	2873.6	3871.5	2.4
			1	0.3	3909.3	285.5	3377.7	4496.7	4.5					7	0.4	7665.4	593.2	5870.8	8907.9	5.7
			2	0.3	4161.5	218.6	3736.2	4712.2	4.5					8	0.4	3043.3	97.7	2861.5	3322.5	5.7
			3	0.5	7182.6	815.7	5868.1	9045.1	7.4					9	0.4	7775.1	693	5960.8	9403.7	5.7
			4	0.5	5509	834.8	4152.7	7291.8	7.4					10	0.4	3055.9	190.3	2855.5	4026.6	5.7
			5	0.2	7848.1	628.7	6853.3	8997	3.2					11	0.5	6955.9	1144.1	4303.8	8771.6	7.1
			6	0.2	6324.5	604.9	5454.3	7263.4	3.2					12	0.5	3095.2	209.1	2796.5	3871.2	7.1
			7	0.4	6927.8	1266	5398.7	10123.8	6.1					13	0.4	6902.6	1739.7	3310.7	9721.5	6
			8	0.4	5881.9	551.1	4759.6	7194.4	6.1					14	0.4	3057.7	126	2827.9	3324.7	6
			9	0.3	6978.7	1141	5424.2	9880	4					15	0.5	6049.8	977.7	3651.9	7769	7.8
			10	0.3	5572.1	400.3	5028	6499.6	4					16	0.5	3067.2	204.3	2787.9	3821	7.8
			11	0.1	7182.2	773.6	6161.2	8607.9	1.7					17	0.6	5747.1	1052.6	3523.4	7704	8.6
			12	0.1	6564.4	1408	4324	9388	1.7					18	0.6	3144.7	361.2	2716	4629.1	8.6
			13	0.2	5851.4	527.9	4982.5	6767.8	2.5			deltaBLM_STB_ICRF 0.5uM_TOP3A-PICH-16.czi
			14	0.2	4846.6	443.2	4102.2	5682.6	2.5					1	0.2	1232.9	70.1	1136.6	1429.2	3.3
														2	0.2	2504.3	246.7	2214.8	3264.2	3.3
			1	1.1	6752.6	1560.6	4246.4	9689	17.5					3	0.1	4154.7	567.8	3215.2	5086.8	1.3
			2	1.1	6393.7	1464.4	4491.7	10162.5	17.5					4	0.1	2243.8	43	2162.4	2321.9	1.3
			3	0.1	8032.5	883.5	6737.2	9140.9	1.1					5	0.3	4397.8	730.7	2669	5593.7	4.8
			4	0.1	6211.6	380.2	5745	6858.9	1.1					6	0.3	2532	464.6	2218	4710.1	4.8
			5	0.3	14405.7	1627.2	11445.9	17935.4	4.3					7	0.2	4122.4	599.9	3074.2	5359.5	3.5
			6	0.3	8901.3	705.6	6891.4	10337.3	4.3					8	0.2	2399.7	189.1	2121.9	2880.4	3.5
			7	0.2	14310.5	1232.2	12383.1	16764.2	2.8					9	0.5	4235	1098	2483.4	8256.2	7.7
			8	0.2	8820.8	683.2	7361.1	9915.1	2.8					10	0.5	2433.6	353.3	2154.3	4487.1	7.7
			9	0.2	12748.4	1159.7	10783.9	15032.7	3.6					11	0.3	5110.3	487.5	3878.5	5840	4.3
			10	0.2	8326.1	817.6	6844	10703.6	3.6					12	0.3	2517.9	267	2201.6	3455.2	4.3
			11	0.3	11767.2	2294.8	8607.2	15970.4	4.9					13	0.2	3911.4	398.3	2810.2	4864.1	3.4
			12	0.3	8358.3	1322.9	6300	11356.2	4.9					14	0.2	2407.5	157.7	2168.5	2800.1	3.4
			13	0.4	11714.6	1578.4	8149.5	13709.3	5.6					15	0.2	4088.6	389.9	3223	4996.6	2.9
			14	0.4	8332.7	1317.2	5922.4	10299.7	5.6					16	0.2	2344.4	56.3	2235.6	2467.7	2.9
			15	0.3	10862.1	1455.3	8331	15453.3	4.9					17	0.1	4938.3	801.2	4109.7	7706.5	1.4
			16	0.3	8516.4	747.3	6714.1	9604	4.9					18	0.1	2358.3	117.6	2185.8	2588.7	1.4
			17	0.5	12992.6	2527.8	6265.7	17616.6	6.9			deltaBLM_STB_ICRF 0.5uM_TOP3A-PICH-17.czi
			18	0.5	8358.9	955.6	6534	10658	6.9					1	0.1	2001.5	61.3	1923.1	2126.8	1.1
			19	0.4	15060.4	2532.1	8529.6	18411.6	5.7					2	0.1	3676	738	3074	5390.8	1.1
			20	0.4	8324.2	792.4	6546.5	10679.7	5.7					3	0.2	7989.9	1060.7	5825.6	9489.1	3
			21	0.4	12855.5	3421.1	7285.6	18133.3	6.2					4	0.2	4056.4	544.5	3559.1	6011.9	3
			22	0.4	7160.5	1299.4	5068.8	9287.3	6.2					5	0.3	6950	1272.4	4673.2	9264.1	5.3
			23	0.4	8063.3	1265.3	6140.4	10711.7	5.4					6	0.3	3700.9	434	3059.5	5256.5	5.3
			24	0.4	5966.5	389.3	4708	6618.1	5.4					7	0.2	7637.3	388.8	6656.4	8572.2	3.8
			25	0.3	11263.1	1024.1	9178.4	13072.4	3.9					8	0.2	4275.7	348.5	3821.1	5122.8	3.8
			26	0.3	8371.7	693.4	6914	9963	3.9					9	0.3	7628.2	1015.2	5755.7	9311.8	4.7
			27	0.5	10690.2	2057.8	7740.6	16099.9	8.4					10	0.3	4006.2	290.6	3556.1	4925.9	4.7
			28	0.5	8357	1065.3	6254.6	11052.9	8.4					11	0.2	8416.6	626.5	7462.5	9935.6	2.8
														12	0.2	3956.1	129.7	3788.5	4323.7	2.8
														13	0.3	7458.9	1997.7	4329.4	10167.9	4.8
														14	0.3	3856.1	346.5	3325.4	4739.1	4.8
														15	0.2	11337.8	844.2	9117	12756.8	2.4
														16	0.2	4214.2	584.7	3768.7	5978.3	2.4
														17	0.1	10670.2	736.5	8966.7	11982.1	2.2
														18	0.1	4035.5	221.7	3704.9	4521.3	2.2
														19	0.2	9081.7	1217.6	7431.9	11309.8	2.8
														20	0.2	4070.4	419.3	3626.9	5183.1	2.8
														21	0.2	8150.3	540.4	7273.8	9131	2.3
														22	0.2	3889.9	155.4	3636	4268.4	2.3
														23	0.3	7079.3	1197.8	4916.5	9360	5.1
														24	0.3	3904.4	304.6	3444	4839.7	5.1
														25	0.2	7844	722.4	6356.5	9073.9	3.4
														26	0.2	3961.1	330.7	3638.1	5082.3	3.4
														27	0.3	6179.6	519.8	4657.3	7540	4.7
														28	0.3	3915.6	365.8	3475.9	5402.6	4.7
														29	0.4	8537.2	2541.1	4891	12725.5	6
														30	0.4	3948.4	395	3441.9	5526.8	6

## Sheet: HAP1, ΔBLM Analysis 
																					Absolute values					Ratio
	HAP1_+ICRF-193_TOP3A-PICH											deltaBLM_+ICRF-193_TOP3A-PICH									HAP1		ΔBLM			HAP1	deltaBLM
	HAP1_STB_ICRF 0.5uM_TOP3A-PICH-02.czi		Mean		Background correction			Values				deltaBLM_STB_ICRF 0.5uM_TOP3A-PICH.czi		Mean		Background correction			Values		TOP3A	PICH	TOP3A	PICH		TOP3A/PICH	TOP3A/PICH
	Background	PICH	3405.8		TOP3A	3905.5	0					Background	PICH	3995.3		TOP3A	4508.5				870.9	3757.3	0	2935.2		0.231789	0
	Background	TOP3A	3905.5		TOP3A	4776.4	870.9	870.9				Background	TOP3A	4508.5		TOP3A	4504.1	-4.4	0		1062.6	3766.4	627.3	6807.5		0.282126	0.0921484
		PICH	7163.1		TOP3A	4968.1	1062.6	1062.6					PICH	6930.5		TOP3A	5135.8	627.3	627.3		1291.3	3374.8	1023.3	6870.3		0.38263	0.148945
		TOP3A	4776.4		TOP3A	5196.8	1291.3	1291.3					TOP3A	4504.1		TOP3A	5531.8	1023.3	1023.3		1485.8	3734.5	613.3	5808.7		0.397858	0.105583
		PICH	7172.2		TOP3A	5391.3	1485.8	1485.8					PICH	10802.8		TOP3A	5121.8	613.3	613.3		841.6	2892.1	1343.4	6165.8		0.291	0.217879
		TOP3A	4968.1		TOP3A	4747.1	841.6	841.6					TOP3A	5135.8		TOP3A	5851.9	1343.4	1343.4		1061.7	3285.1	1142.3	7394		0.323187	0.15449
		PICH	6780.6		TOP3A	4967.2	1061.7	1061.7					PICH	10865.6		TOP3A	5650.8	1142.3	1142.3				983.2	7866.8			0.124981
		TOP3A	5196.8		PICH	3405.8	0						TOP3A	5531.8		TOP3A	5491.7	983.2	983.2		401.3	1255.6	725.1	7047.8		0.319608	0.102883
		PICH	7140.3		PICH	7163.1	3757.3	3757.3					PICH	9804		TOP3A	5233.6	725.1	725.1		456.8	1405.6	598.4	7978.9		0.324986	0.0749978
		TOP3A	5391.3		PICH	7172.2	3766.4	3766.4					TOP3A	5121.8		TOP3A	5106.9	598.4	598.4		358.6	1612.8	392.4	5707.4		0.222346	0.0687528
		PICH	6297.9		PICH	6780.6	3374.8	3374.8					PICH	10161.1		TOP3A	4900.9	392.4	392.4		752.7	1774.2	0.2	4506.7		0.424248	4.43784e-05
		TOP3A	4747.1		PICH	7140.3	3734.5	3734.5					TOP3A	5851.9		TOP3A	4508.7	0.2	0.2		1238.9	2357.9	110.6	3622		0.525425	0.0305356
		PICH	6690.9		PICH	6297.9	2892.1	2892.1					PICH	11389.3		TOP3A	4619.1	110.6	110.6		1755.3	2387.4				0.735235
		TOP3A	4967.2		PICH	6690.9	3285.1	3285.1					TOP3A	5650.8		PICH	3995.3	0			1667.9	3304	38	4617.1		0.504812	0.00823027
	HAP1_STB_ICRF 0.5uM_TOP3A-PICH-03.czi												PICH	11862.1		PICH	6930.5	2935.2	2935.2		1884.1	3711.8	0	3192		0.507597	0
	Background	PICH	2485.2		TOP3A	3932.9	0						TOP3A	5491.7		PICH	10802.8	6807.5	6807.5		1390.9	3823.2	36.5	4976.6		0.363805	0.00733432
	Background	TOP3A	3932.9		TOP3A	4334.2	401.3	401.3					PICH	11043.1		PICH	10865.6	6870.3	6870.3		1388.3	3731.4	83.5	5410.4		0.372059	0.0154332
		PICH	3740.8		TOP3A	4389.7	456.8	456.8					TOP3A	5233.6		PICH	9804	5808.7	5808.7		1475.2	3293.7	0	7153.2		0.447885	0
		TOP3A	4334.2		TOP3A	4291.5	358.6	358.6					PICH	11974.2		PICH	10161.1	6165.8	6165.8		981	2214.4	0	5957.2		0.443009	0
		PICH	3890.8		TOP3A	4685.6	752.7	752.7					TOP3A	5106.9		PICH	11389.3	7394	7394		927	1604.3	37.4	7322.4		0.577822	0.00510761
		TOP3A	4389.7		TOP3A	5171.8	1238.9	1238.9					PICH	9702.7		PICH	11862.1	7866.8	7866.8		797.6	1901.5	184.4	6492.7		0.419458	0.0284011
		PICH	4098		TOP3A	5688.2	1755.3	1755.3					TOP3A	4900.9		PICH	11043.1	7047.8	7047.8		709.1	2052	0	6371.9		0.345565	0
		TOP3A	4291.5		TOP3A	5600.8	1667.9	1667.9					PICH	8502		PICH	11974.2	7978.9	7978.9				0	5151.5			0
		PICH	4259.4		TOP3A	5817	1884.1	1884.1					TOP3A	4508.7		PICH	9702.7	5707.4	5707.4		1357.9	2685.1	0	5711.8		0.505717	0
		TOP3A	4685.6		TOP3A	5323.8	1390.9	1390.9					PICH	7617.3		PICH	8502	4506.7	4506.7		0	2389.5	0	4466.5		0	0
		PICH	4843.1		TOP3A	5321.2	1388.3	1388.3					TOP3A	4619.1		PICH	7617.3	3622	3622		1571.3	3156				0.497877
		TOP3A	5171.8		TOP3A	5408.1	1475.2	1475.2				deltaBLM_STB_ICRF 0.5uM_TOP3A-PICH-02.czi									1608.2	3749.7	0	1257.1		0.428888	0
		PICH	4872.6		TOP3A	4913.9	981	981				Background	PICH	3291.1		TOP3A	3952.8	0			1603.7	4799.8	190.4	2026.7		0.334118	0.0939458
		TOP3A	5688.2		TOP3A	4859.9	927	927				Background	TOP3A	3952.8		TOP3A	3990.8	38	38		1361.4	3825.6	59.4	2083.9		0.355866	0.0285042
		PICH	5789.2		TOP3A	4730.5	797.6	797.6					PICH	7908.2		TOP3A	3830	-122.8	0		1181.6	4534.3	329.6	2966.5		0.260591	0.111107
		TOP3A	5600.8		TOP3A	4642	709.1	709.1					TOP3A	3990.8		TOP3A	3989.3	36.5	36.5		1691.2	4530.2	389	3091.5		0.373317	0.125829
		PICH	6197		PICH	2485.2	0						PICH	6483.1		TOP3A	4036.3	83.5	83.5		1133.5	3881.7	178.5	2915.5		0.292011	0.0612245
		TOP3A	5817		PICH	3740.8	1255.6	1255.6					TOP3A	3830		TOP3A	3847.7	-105.1	0		1176.4	4712.8	82.7	2195.2		0.249618	0.0376731
		PICH	6308.4		PICH	3890.8	1405.6	1405.6					PICH	8267.7		TOP3A	3877.4	-75.4	0		908.9	3939.7	0	1666		0.230703	0
		TOP3A	5323.8		PICH	4098	1612.8	1612.8					TOP3A	3989.3		TOP3A	3990.2	37.4	37.4		924.6	4434.2	0	1351.5		0.208516	0
		PICH	6216.6		PICH	4259.4	1774.2	1774.2					PICH	8701.5		TOP3A	4137.2	184.4	184.4		776.4	3931.9	0	1350.5		0.197462	0
		TOP3A	5321.2		PICH	4843.1	2357.9	2357.9					TOP3A	4036.3		TOP3A	3548	-404.8	0		682.6	4706.5				0.145033
		PICH	5778.9		PICH	4872.6	2387.4	2387.4					PICH	10444.3		TOP3A	3631.7	-321.1	0		1115.3	3985.9	0	4334.1		0.279811	0
		TOP3A	5408.1		PICH	5789.2	3304	3304					TOP3A	3847.7		TOP3A	3649	-303.8	0				86.5	2707.6			0.0319471
		PICH	4699.6		PICH	6197	3711.8	3711.8					PICH	9248.3		TOP3A	3768.6	-184.2	0		1804.2	1681.5	0	4921		1.07297	0
		TOP3A	4913.9		PICH	6308.4	3823.2	3823.2					TOP3A	3877.4		PICH	3291.1	0					233	4301.2			0.0541709
		PICH	4089.5		PICH	6216.6	3731.4	3731.4					PICH	10613.5		PICH	7908.2	4617.1	4617.1		870	2865.3	364.4	9429.2		0.303633	0.0386459
		TOP3A	4859.9		PICH	5778.9	3293.7	3293.7					TOP3A	3990.2		PICH	6483.1	3192	3192		2236.5	3430	45.8	5506.3		0.652041	0.00831775
		PICH	4386.7		PICH	4699.6	2214.4	2214.4					PICH	9783.8		PICH	8267.7	4976.6	4976.6		2528.6	4983.4	79.7	5355.9		0.507405	0.0148808
		TOP3A	4730.5		PICH	4089.5	1604.3	1604.3					TOP3A	4137.2		PICH	8701.5	5410.4	5410.4		2012.9	3998.2	0	5330.7		0.503452	0
		PICH	4537.2		PICH	4386.7	1901.5	1901.5					PICH	9663		PICH	10444.3	7153.2	7153.2		1708.4	4293	0	5392.4		0.39795	0
		TOP3A	4642		PICH	4537.2	2052	2052					TOP3A	3548		PICH	9248.3	5957.2	5957.2		1757.3	4216.9	0	4462.3		0.416728	0
	HAP1_STB_ICRF 0.5uM_TOP3A-PICH-04.czi												PICH	8442.6		PICH	10613.5	7322.4	7322.4		2462.7	5595.7	335.6	5763.3		0.440106	0.0582305
	Background	PICH	3809.5		TOP3A	4536.8	0						TOP3A	3631.7		PICH	9783.8	6492.7	6492.7				0	3572.1			0
	Background	TOP3A	4536.8		TOP3A	5894.7	1357.9	1357.9					PICH	9002.9		PICH	9663	6371.9	6371.9		1479.5	2093.8				0.70661
		PICH	6494.6		TOP3A	4476.1	-60.7	0					TOP3A	3649		PICH	8442.6	5151.5	5151.5		1623.8	1944.1	0	1997.8		0.835245	0
		TOP3A	5894.7		TOP3A	6108.1	1571.3	1571.3					PICH	7757.6		PICH	9002.9	5711.8	5711.8		1638.4	1982.2	664.9	2576.4		0.826556	0.258073
		PICH	6199		TOP3A	6145	1608.2	1608.2					TOP3A	3768.6		PICH	7757.6	4466.5	4466.5				750	3295.1			0.227611
		TOP3A	4476.1		TOP3A	6140.5	1603.7	1603.7				deltaBLM_STB_ICRF 0.5uM_TOP3A-PICH-03.czi									503.3	860.6	776.9	2394.6		0.584825	0.324438
		PICH	6965.5		TOP3A	5898.2	1361.4	1361.4				Background	PICH	1578.8		TOP3A	3398.1	0			758.8	1053.6	941	2255.8		0.720197	0.417147
		TOP3A	6108.1		TOP3A	5718.4	1181.6	1181.6				Background	TOP3A	3398.1		TOP3A	3130.8	-267.3	0		1020.3	1277.1				0.798919
		PICH	7559.2		TOP3A	6228	1691.2	1691.2					PICH	2835.9		TOP3A	3588.5	190.4	190.4		1800.7	1663.4	0	2164.9		1.08254	0
		TOP3A	6145		TOP3A	5670.3	1133.5	1133.5					TOP3A	3130.8		TOP3A	3457.5	59.4	59.4		2134.4	2440.2	39.3	2784.4		0.874682	0.0141144
		PICH	8609.3		TOP3A	5713.2	1176.4	1176.4					PICH	3605.5		TOP3A	3727.7	329.6	329.6		1550.3	1139	90.8	2608.7		1.36111	0.0348066
		TOP3A	6140.5		TOP3A	5445.7	908.9	908.9					TOP3A	3588.5		TOP3A	3787.1	389	389		1315.1	995.5	0	2671.9		1.32104	0
		PICH	7635.1		TOP3A	5461.4	924.6	924.6					PICH	3662.7		TOP3A	3576.6	178.5	178.5		910.4	1563.3	80.1	3483.6		0.582358	0.0229935
		TOP3A	5898.2		TOP3A	5313.2	776.4	776.4					TOP3A	3457.5		TOP3A	3480.8	82.7	82.7		376.7	939.8	0	3128.3		0.40083	0
		PICH	8343.8		TOP3A	5219.4	682.6	682.6					PICH	4545.3		TOP3A	3330.7	-67.4	0				279	4394.1			0.0634942
		TOP3A	5718.4		TOP3A	5652.1	1115.3	1115.3					TOP3A	3727.7		TOP3A	3158.7	-239.4	0		859	3874.4	156	4310.8		0.221712	0.0361882
		PICH	8339.7		PICH	3809.5	0						PICH	4670.3		TOP3A	2890.1	-508	0		1691.5	3011.2	1	4649.1		0.561736	0.000215095
		TOP3A	6228		PICH	6494.6	2685.1	2685.1					TOP3A	3787.1		PICH	1578.8	0			2506.5	3582	27.8	1531.2		0.699749	0.0181557
		PICH	7691.2		PICH	6199	2389.5	2389.5					PICH	4494.3		PICH	2835.9	1257.1	1257.1		1465.9	2523.3				0.580946
		TOP3A	5670.3		PICH	6965.5	3156	3156					TOP3A	3576.6		PICH	3605.5	2026.7	2026.7		1923.6	2275.3	522.9	3703.9		0.845427	0.141176
		PICH	8522.3		PICH	7559.2	3749.7	3749.7					PICH	3774		PICH	3662.7	2083.9	2083.9		2020.9	2439.7	593	3940.2		0.82834	0.1505
		TOP3A	5713.2		PICH	8609.3	4799.8	4799.8					TOP3A	3480.8		PICH	4545.3	2966.5	2966.5		1955.7	2666	586.2	3897		0.733571	0.150423
		PICH	7749.2		PICH	7635.1	3825.6	3825.6					PICH	3244.8		PICH	4670.3	3091.5	3091.5		2272.8	1460.9	305.2	4520.6		1.55575	0.0675132
		TOP3A	5445.7		PICH	8343.8	4534.3	4534.3					TOP3A	3330.7		PICH	4494.3	2915.5	2915.5		1298.4	4326.9	575.8	6616.6		0.300076	0.0870235
		PICH	8243.7		PICH	8339.7	4530.2	4530.2					PICH	2930.3		PICH	3774	2195.2	2195.2		1420.7	2275.5	0	5807.4		0.624346	0
		TOP3A	5461.4		PICH	7691.2	3881.7	3881.7					TOP3A	3158.7		PICH	3244.8	1666	1666				0	7099.9			0
		PICH	7741.4		PICH	8522.3	4712.8	4712.8					PICH	2929.3		PICH	2930.3	1351.5	1351.5		577.2	1627.8	0	4453.8		0.354589	0
		TOP3A	5313.2		PICH	7749.2	3939.7	3939.7					TOP3A	2890.1		PICH	2929.3	1350.5	1350.5		1124.6	2139.5	0	3129.9		0.525637	0
		PICH	8516		PICH	8243.7	4434.2	4434.2				deltaBLM_STB_ICRF 0.5uM_TOP3A-PICH-04.czi									1433.9	1193	0	3284.7		1.20193	0
		TOP3A	5219.4		PICH	7741.4	3931.9	3931.9				Background	PICH	2197.1		TOP3A	3600.4	0			790.8	1241.8	0	2217.7		0.636818	0
		PICH	7795.4		PICH	8516	4706.5	4706.5				Background	TOP3A	3600.4		TOP3A	3428.5	-171.9	0		915.4	1057.3				0.86579
		TOP3A	5652.1		PICH	7795.4	3985.9	3985.9					PICH	6531.2		TOP3A	3686.9	86.5	86.5		758	1074.2	0	1276.6		0.705641	0
	HAP1_STB_ICRF 0.5uM_TOP3A-PICH-05.czi												TOP3A	3428.5		TOP3A	3565	-35.4	0		948.9	1478.9	0	2972.4		0.641626	0
	Background	PICH	3573.2		TOP3A	5251.4	0						PICH	4904.7		TOP3A	3833.4	233	233		734	1502.9	0	3428.1		0.488389	0
	Background	TOP3A	5251.4		TOP3A	7055.6	1804.2	1804.2					TOP3A	3686.9		TOP3A	3964.8	364.4	364.4		632.1	1489.2	1.5	4012.2		0.424456	0.00037386
		PICH	5254.7		PICH	3573.2	0						PICH	7118.1		TOP3A	3646.2	45.8	45.8		1276.3	1870	180.1	4263.5		0.682513	0.0422423
		TOP3A	7055.6		PICH	5254.7	1681.5	1681.5					TOP3A	3565		TOP3A	3680.1	79.7	79.7				68.9	5100.5			0.0135085
	HAP1_STB_ICRF 0.5uM_TOP3A-PICH-06.czi												PICH	6498.3		TOP3A	3563.1	-37.3	0		524.1	1306.6	38.7	3826.6		0.401117	0.0101134
	Background	PICH	3762.7		TOP3A	4850	0						TOP3A	3833.4		TOP3A	3516.4	-84	0		1908.5	3905	59.3	3234.7		0.488732	0.0183325
	Background	TOP3A	4850		TOP3A	5720	870	870					PICH	11626.3		TOP3A	3443	-157.4	0		1721.2	3432.9	116.1	3575.9		0.501384	0.0324674
		PICH	6628		TOP3A	7086.5	2236.5	2236.5					TOP3A	3964.8		TOP3A	3936	335.6	335.6		953.4	2020.4	2.9	2796.6		0.471887	0.00103697
		TOP3A	5720		TOP3A	7378.6	2528.6	2528.6					PICH	7703.4		TOP3A	3476	-124.4	0		953.1	2244.6	0	2465.6		0.424619	0
		PICH	7192.7		TOP3A	6862.9	2012.9	2012.9					TOP3A	3646.2		PICH	2197.1	0			1455.5	2423.6				0.600553
		TOP3A	7086.5		TOP3A	6558.4	1708.4	1708.4					PICH	7553		PICH	6531.2	4334.1	4334.1		1423.9	3292.9	0	3114.4		0.432415	0
		PICH	8746.1		TOP3A	6607.3	1757.3	1757.3					TOP3A	3680.1		PICH	4904.7	2707.6	2707.6		1466.4	3393.6	0	6124		0.432107	0
		TOP3A	7378.6		TOP3A	7312.7	2462.7	2462.7					PICH	7527.8		PICH	7118.1	4921	4921		1407.4	2695.5	0	3595.7		0.522129	0
		PICH	7760.9		PICH	3762.7	0						TOP3A	3563.1		PICH	6498.3	4301.2	4301.2		1214.2	3030.1	0	5289.6		0.400713	0
		TOP3A	6862.9		PICH	6628	2865.3	2865.3					PICH	7589.5		PICH	11626.3	9429.2	9429.2		1189.2	2298.2	0	6721.3		0.517448	0
		PICH	8055.7		PICH	7192.7	3430	3430					TOP3A	3516.4		PICH	7703.4	5506.3	5506.3		1038.2	1967.6	0	4750.4		0.527648	0
		TOP3A	6558.4		PICH	8746.1	4983.4	4983.4					PICH	6659.4		PICH	7553	5355.9	5355.9		898.5	1603.8	184.7	7343.2		0.560232	0.0251525
		PICH	7979.6		PICH	7760.9	3998.2	3998.2					TOP3A	3443		PICH	7527.8	5330.7	5330.7		512.5	1388.1	110.8	7608.3		0.36921	0.014563
		TOP3A	6607.3		PICH	8055.7	4293	4293					PICH	7960.4		PICH	7589.5	5392.4	5392.4				146.1	7514.6			0.0194422
		PICH	9358.4		PICH	7979.6	4216.9	4216.9					TOP3A	3936		PICH	6659.4	4462.3	4462.3		1306.8	1990.7	0	8949		0.656453	0
		TOP3A	7312.7		PICH	9358.4	5595.7	5595.7					PICH	5769.2		PICH	7960.4	5763.3	5763.3		1939.3	2666.5	0	4774.9		0.727283	0
	HAP1_STB_ICRF 0.5uM_TOP3A-PICH-07.czi												TOP3A	3476		PICH	5769.2	3572.1	3572.1		1810.6	1377.7	0	3268.7		1.31422	0
	Background	PICH	3622.6		TOP3A	4122.4	0					deltaBLM_STB_ICRF 0.5uM_TOP3A-PICH-05.czi									960.5	2198.6				0.436869
	Background	TOP3A	4122.4		TOP3A	5601.9	1479.5	1479.5				Background	PICH	2860.5		TOP3A	4002	0			2112.1	1906.3	56.2	751.8		1.10796	0.0747539
		PICH	6216.2		TOP3A	5746.2	1623.8	1623.8				Background	TOP3A	4002		TOP3A	3708.9	-293.1	0		335.2	1412	172.3	1669.9		0.237394	0.10318
		TOP3A	5601.9		TOP3A	5760.8	1638.4	1638.4					PICH	4858.3		TOP3A	4666.9	664.9	664.9				360.5	2460			0.146545
		PICH	6066.5		PICH	3622.6	-499.8						TOP3A	3708.9		TOP3A	4752	750	750		1471.3	1364.6	261.5	1866.3		1.07819	0.140117
		TOP3A	5746.2		PICH	6216.2	2093.8	2093.8					PICH	5436.9		TOP3A	4778.9	776.9	776.9		2049.6	2725.8	388.7	2245.3		0.751926	0.173117
		PICH	6104.6		PICH	6066.5	1944.1	1944.1					TOP3A	4666.9		TOP3A	4943	941	941				392.7	2721.9			0.144274
		TOP3A	5760.8		PICH	6104.6	1982.2	1982.2					PICH	6155.6		PICH	2860.5	0			323.8	2202.7	538	2416		0.147001	0.222682
	HAP1_STB_ICRF 0.5uM_TOP3A-PICH-09.czi												TOP3A	4752		PICH	4858.3	1997.8	1997.8		1005.9	3419.5	521	4048.9		0.294166	0.128677
	Background	PICH	1968.8		TOP3A	2890.5	0						PICH	5255.1		PICH	5436.9	2576.4	2576.4		1136.4	2537.4	417.3	2598		0.44786	0.160624
	Background	TOP3A	2890.5		TOP3A	3393.8	503.3	503.3					TOP3A	4778.9		PICH	6155.6	3295.1	3295.1		1456.2	3325.7	293.6	1386.8		0.437863	0.21171
		PICH	2829.4		TOP3A	3649.3	758.8	758.8					PICH	5116.3		PICH	5255.1	2394.6	2394.6		648.7	2335.8	179.3	862.8		0.277721	0.207812
		TOP3A	3393.8		TOP3A	3910.8	1020.3	1020.3					TOP3A	4943		PICH	5116.3	2255.8	2255.8		1055.4	3375.6	562	3807.9		0.312656	0.147588
		PICH	3022.4		TOP3A	4691.2	1800.7	1800.7				deltaBLM_STB_ICRF 0.5uM_TOP3A-PICH-06.czi									941.6	3897.3				0.241603
		TOP3A	3649.3		TOP3A	5024.9	2134.4	2134.4				Background	PICH	1790.8		TOP3A	3671.4	0			1241.1	3653.6	357.7	2289.7		0.339692	0.156221
		PICH	3245.9		TOP3A	4440.8	1550.3	1550.3				Background	TOP3A	3671.4		TOP3A	3394.5	-276.9	0		1169.7	3440.7	511.9	2402.2		0.33996	0.213096
		TOP3A	3910.8		TOP3A	4205.6	1315.1	1315.1					PICH	3955.7		TOP3A	3710.7	39.3	39.3		1184.7	3092.8	443.6	2054.8		0.383051	0.215885
		PICH	3632.2		TOP3A	3800.9	910.4	910.4					TOP3A	3394.5		TOP3A	3762.2	90.8	90.8		538.9	1218.8	261.5	1951.7		0.442156	0.133986
		TOP3A	4691.2		TOP3A	3267.2	376.7	376.7					PICH	4575.2		TOP3A	3622.8	-48.6	0
		PICH	4409		PICH	1968.8	0						TOP3A	3710.7		TOP3A	3751.5	80.1	80.1		735.2	3485.5	0	1916.9		0.210931	0
		TOP3A	5024.9		PICH	2829.4	860.6	860.6					PICH	4399.5		TOP3A	3593.4	-78	0		1281.2	3680.2	0	1635.5		0.348133	0
		PICH	3107.8		PICH	3022.4	1053.6	1053.6					TOP3A	3762.2		TOP3A	3950.4	279	279		617.2	2183.1	0	1736.2		0.282717	0
		TOP3A	4440.8		PICH	3245.9	1277.1	1277.1					PICH	4462.7		TOP3A	3827.4	156	156				0	1523.5			0
		PICH	2964.3		PICH	3632.2	1663.4	1663.4					TOP3A	3622.8		TOP3A	3672.4	1	1		480.8	1969.8				0.244086
		TOP3A	4205.6		PICH	4409	2440.2	2440.2					PICH	5274.4		TOP3A	3699.2	27.8	27.8		857.4	2596.3	0	1719.2		0.330239	0
		PICH	3532.1		PICH	3107.8	1139	1139					TOP3A	3751.5		PICH	1790.8	0			1334.4	2529.5	16.6	5157.3		0.527535	0.00321874
		TOP3A	3800.9		PICH	2964.3	995.5	995.5					PICH	4919.1		PICH	3955.7	2164.9	2164.9		1400.1	1831.5	0	4348.5		0.764455	0
		PICH	2908.6		PICH	3532.1	1563.3	1563.3					TOP3A	3593.4		PICH	4575.2	2784.4	2784.4		1721.1	2486.5	0	2517.8		0.692178	0
		TOP3A	3267.2		PICH	2908.6	939.8	939.8					PICH	6184.9		PICH	4399.5	2608.7	2608.7		1852.9	2516.1	25.7	1672.5		0.736417	0.0153662
	HAP1_STB_ICRF 0.5uM_TOP3A-PICH-10.czi												TOP3A	3950.4		PICH	4462.7	2671.9	2671.9		517.4	2060.1				0.251153
	Background	PICH	3262.1		TOP3A	3743.5	0						PICH	6101.6		PICH	5274.4	3483.6	3483.6				4	1996			0.00200401
	Background	TOP3A	3743.5		TOP3A	4602.5	859	859					TOP3A	3827.4		PICH	4919.1	3128.3	3128.3		1013.1	1594.8	53	2027.6		0.635252	0.0261393
		PICH	7136.5		TOP3A	5435	1691.5	1691.5					PICH	6439.9		PICH	6184.9	4394.1	4394.1		933	3003.7	274.2	2101.5		0.310617	0.130478
		TOP3A	4602.5		TOP3A	6250	2506.5	2506.5					TOP3A	3672.4		PICH	6101.6	4310.8	4310.8		882.5	2398.2	250.7	2259.8		0.367984	0.110939
		PICH	6273.3		TOP3A	5209.4	1465.9	1465.9					PICH	3322		PICH	6439.9	4649.1	4649.1		1074.7	1565.8	443	2081.9		0.686358	0.212786
		TOP3A	5435		TOP3A	5667.1	1923.6	1923.6					TOP3A	3699.2		PICH	3322	1531.2	1531.2		689.6	1541.7	441.9	2127.2		0.447298	0.207738
		PICH	6844.1		TOP3A	5764.4	2020.9	2020.9				deltaBLM_STB_ICRF 0.5uM_TOP3A-PICH-07.czi									719.1	1517.9				0.473747
		TOP3A	6250		TOP3A	5699.2	1955.7	1955.7				Background	PICH	4511.7		TOP3A	5763.1	0			564.3	1220.4	0	910.1		0.462389	0
		PICH	5785.4		TOP3A	6016.3	2272.8	2272.8				Background	TOP3A	5763.1		TOP3A	6286	522.9	522.9		495.9	1025.2	0	833.4		0.48371	0
		TOP3A	5209.4		TOP3A	5041.9	1298.4	1298.4					PICH	8215.6		TOP3A	6356.1	593	593				0	1245.9			0
		PICH	5537.4		TOP3A	5164.2	1420.7	1420.7					TOP3A	6286		TOP3A	6349.3	586.2	586.2		530.8	1087.9	0	1692.9		0.487912	0
		TOP3A	5667.1		PICH	3262.1	0						PICH	8451.9		TOP3A	6068.3	305.2	305.2		709.6	2248	0	1329		0.315658	0
		PICH	5701.8		PICH	7136.5	3874.4	3874.4					TOP3A	6356.1		TOP3A	6338.9	575.8	575.8		987	945.4	0	1039		1.044	0
		TOP3A	5764.4		PICH	6273.3	3011.2	3011.2					PICH	8408.7		TOP3A	5578.7	-184.4	0		1105.3	1470.3	0	1714.5		0.751751	0
		PICH	5928.1		PICH	6844.1	3582	3582					TOP3A	6349.3		TOP3A	5752.4	-10.7	0		540.9	1922.8				0.281309
		TOP3A	5699.2		PICH	5785.4	2523.3	2523.3					PICH	9032.3		TOP3A	5655	-108.1	0		566.5	1215.5	21	3099.9		0.466063	0.00677441
		PICH	4723		PICH	5537.4	2275.3	2275.3					TOP3A	6068.3		TOP3A	5270.4	-492.7	0				138.5	2869.9			0.0482595
		TOP3A	6016.3		PICH	5701.8	2439.7	2439.7					PICH	11128.3		TOP3A	5021.2	-741.9	0		1347.5	3273.3	0	5929.6		0.411664	0
		PICH	7589		PICH	5928.1	2666	2666					TOP3A	6338.9		TOP3A	5514.6	-248.5	0		2163	3938.8	0	6039.3		0.549152	0
		TOP3A	5041.9		PICH	4723	1460.9	1460.9					PICH	10319.1		PICH	4511.7	0			1720.4	3018.5	36.6	5220.1		0.569952	0.00701136
		PICH	5537.6		PICH	7589	4326.9	4326.9					TOP3A	5578.7		PICH	8215.6	3703.9	3703.9		1410.6	3069.4	0	5166.8		0.459569	0
		TOP3A	5164.2		PICH	5537.6	2275.5	2275.5					PICH	11611.6		PICH	8451.9	3940.2	3940.2		2402.9	3272.9	8.6	4314		0.734181	0.00199351
	HAP1_STB_ICRF 0.5uM_TOP3A-PICH-11.czi												TOP3A	5752.4		PICH	8408.7	3897	3897		685.1	1942.1	86.1	4011.3		0.352762	0.0214644
	Background	PICH	1858.8		TOP3A	5280.9	0						PICH	8965.5		PICH	9032.3	4520.6	4520.6
	Background	TOP3A	5280.9		TOP3A	5858.1	577.2	577.2					TOP3A	5655		PICH	11128.3	6616.6	6616.6		0	1279.9	0	2921.8		0	0
		PICH	3486.6		TOP3A	6405.5	1124.6	1124.6					PICH	7641.6		PICH	10319.1	5807.4	5807.4		2507.6	7653.1	27.7	3164.9		0.327658	0.00875225
		TOP3A	5858.1		TOP3A	6714.8	1433.9	1433.9					TOP3A	5270.4		PICH	11611.6	7099.9	7099.9		2427.1	7557.9	0	2889.5		0.321134	0
		PICH	3998.3		TOP3A	6071.7	790.8	790.8					PICH	7796.4		PICH	8965.5	4453.8	4453.8		1932.4	5995.8	0	3002.1		0.322292	0
		TOP3A	6405.5		TOP3A	6196.3	915.4	915.4					TOP3A	5021.2		PICH	7641.6	3129.9	3129.9		1964.6	5014.6	13.6	3877.4		0.391776	0.00350751
		PICH	3051.8		TOP3A	6038.9	758	758					PICH	6729.4		PICH	7796.4	3284.7	3284.7		1939	4962	0	2678.5		0.39077	0
		TOP3A	6714.8		TOP3A	6229.8	948.9	948.9					TOP3A	5514.6		PICH	6729.4	2217.7	2217.7		2122.7	4109.5	0	2855.7		0.516535	0
		PICH	3100.6		TOP3A	6014.9	734	734				deltaBLM_STB_ICRF 0.5uM_TOP3A-PICH-09.czi									1965.2	6240	0	3705.4		0.314936	0
		TOP3A	6071.7		TOP3A	5913	632.1	632.1				Background	PICH	1224.6		TOP3A	2135.7	0			1930.5	8307.8				0.232372
		PICH	2916.1		TOP3A	6557.2	1276.3	1276.3				Background	TOP3A	2135.7		TOP3A	2122.8	-12.9	0		766.8	6102.9	380.4	5988.4		0.125645	0.0635228
		TOP3A	6196.3		PICH	1858.8	0						PICH	2501.2		TOP3A	2025.3	-110.4	0		0	1310.7	24.9	4948.5		0	0.00503183
		PICH	2933		PICH	3486.6	1627.8	1627.8					TOP3A	2122.8		TOP3A	1951.6	-184.1	0		1978	4510.5	599.7	5635.8		0.438532	0.106409
		TOP3A	6038.9		PICH	3998.3	2139.5	2139.5					PICH	4197		TOP3A	2137.2	1.5	1.5		1963.3	3937.6	330.2	5626.7		0.498603	0.0586845
		PICH	3337.7		PICH	3051.8	1193	1193					TOP3A	2025.3		TOP3A	2315.8	180.1	180.1				280.1	6415.1
		TOP3A	6229.8		PICH	3100.6	1241.8	1241.8					PICH	4652.7		TOP3A	2204.6	68.9	68.9				180.1	5457.4
		PICH	3361.7		PICH	2916.1	1057.3	1057.3					TOP3A	1951.6		TOP3A	2174.4	38.7	38.7				538.2	9336.3
		TOP3A	6014.9		PICH	2933	1074.2	1074.2					PICH	5236.8		TOP3A	2195	59.3	59.3				359.5	8668.7
		PICH	3348		PICH	3337.7	1478.9	1478.9					TOP3A	2137.2		TOP3A	2251.8	116.1	116.1				394.4	7080.2
		TOP3A	5913		PICH	3361.7	1502.9	1502.9					PICH	5488.1		TOP3A	2138.6	2.9	2.9				213.9	6148.8
		PICH	3728.8		PICH	3348	1489.2	1489.2					TOP3A	2315.8		TOP3A	2033.7	-102	0				228.4	5077.8
		TOP3A	6557.2		PICH	3728.8	1870	1870					PICH	6325.1		PICH	1224.6	0					285.1	5842.5
	HAP1_STB_ICRF 0.5uM_TOP3A-PICH-12.czi												TOP3A	2204.6		PICH	2501.2	1276.6	1276.6				239.6	4178.1
	Background	PICH	2983.5		TOP3A	3026.5	0						PICH	5051.2		PICH	4197	2972.4	2972.4				272.4	6535.7
	Background	TOP3A	3026.5		TOP3A	3550.6	524.1	524.1					TOP3A	2174.4		PICH	4652.7	3428.1	3428.1
		PICH	4290.1		TOP3A	4935	1908.5	1908.5					PICH	4459.3		PICH	5236.8	4012.2	4012.2
		TOP3A	3550.6		TOP3A	4747.7	1721.2	1721.2					TOP3A	2195		PICH	5488.1	4263.5	4263.5
		PICH	6888.5		TOP3A	3979.9	953.4	953.4					PICH	4800.5		PICH	6325.1	5100.5	5100.5
		TOP3A	4935		TOP3A	3979.6	953.1	953.1					TOP3A	2251.8		PICH	5051.2	3826.6	3826.6
		PICH	6416.4		TOP3A	4482	1455.5	1455.5					PICH	4021.2		PICH	4459.3	3234.7	3234.7
		TOP3A	4747.7		TOP3A	4450.4	1423.9	1423.9					TOP3A	2138.6		PICH	4800.5	3575.9	3575.9
		PICH	5003.9		TOP3A	4492.9	1466.4	1466.4					PICH	3690.2		PICH	4021.2	2796.6	2796.6
		TOP3A	3979.9		TOP3A	4433.9	1407.4	1407.4					TOP3A	2033.7		PICH	3690.2	2465.6	2465.6
		PICH	5228.1		TOP3A	4240.7	1214.2	1214.2				deltaBLM_STB_ICRF 0.5uM_TOP3A-PICH-10.czi
		TOP3A	3979.6		TOP3A	4215.7	1189.2	1189.2				Background	PICH	4174.1		TOP3A	4468.5	0
		PICH	5407.1		TOP3A	4064.7	1038.2	1038.2				Background	TOP3A	4468.5		TOP3A	3662.4	-806.1	0
		TOP3A	4482		TOP3A	3925	898.5	898.5					PICH	7288.5		TOP3A	4144.4	-324.1	0
		PICH	6276.4		TOP3A	3539	512.5	512.5					TOP3A	3662.4		TOP3A	3921.6	-546.9	0
		TOP3A	4450.4		PICH	2983.5	0						PICH	10298.1		TOP3A	4454.2	-14.3	0
		PICH	6377.1		PICH	4290.1	1306.6	1306.6					TOP3A	4144.4		TOP3A	4206.4	-262.1	0
		TOP3A	4492.9		PICH	6888.5	3905	3905					PICH	7769.8		TOP3A	4171.6	-296.9	0
		PICH	5679		PICH	6416.4	3432.9	3432.9					TOP3A	3921.6		TOP3A	4653.2	184.7	184.7
		TOP3A	4433.9		PICH	5003.9	2020.4	2020.4					PICH	9463.7		TOP3A	4579.3	110.8	110.8
		PICH	6013.6		PICH	5228.1	2244.6	2244.6					TOP3A	4454.2		TOP3A	4614.6	146.1	146.1
		TOP3A	4240.7		PICH	5407.1	2423.6	2423.6					PICH	10895.4		TOP3A	4454.1	-14.4	0
		PICH	5281.7		PICH	6276.4	3292.9	3292.9					TOP3A	4206.4		TOP3A	4089.5	-379	0
		TOP3A	4215.7		PICH	6377.1	3393.6	3393.6					PICH	8924.5		TOP3A	3851.7	-616.8	0
		PICH	4951.1		PICH	5679	2695.5	2695.5					TOP3A	4171.6		PICH	4174.1	0
		TOP3A	4064.7		PICH	6013.6	3030.1	3030.1					PICH	11517.3		PICH	7288.5	3114.4	3114.4
		PICH	4587.3		PICH	5281.7	2298.2	2298.2					TOP3A	4653.2		PICH	10298.1	6124	6124
		TOP3A	3925		PICH	4951.1	1967.6	1967.6					PICH	11782.4		PICH	7769.8	3595.7	3595.7
		PICH	4371.6		PICH	4587.3	1603.8	1603.8					TOP3A	4579.3		PICH	9463.7	5289.6	5289.6
		TOP3A	3539		PICH	4371.6	1388.1	1388.1					PICH	11688.7		PICH	10895.4	6721.3	6721.3
	HAP1_STB_ICRF 0.5uM_TOP3A-PICH-13.czi												TOP3A	4614.6		PICH	8924.5	4750.4	4750.4
	Background	PICH	3016.5		TOP3A	4273.2	0						PICH	13123.1		PICH	11517.3	7343.2	7343.2
	Background	TOP3A	4273.2		TOP3A	5580	1306.8	1306.8					TOP3A	4454.1		PICH	11782.4	7608.3	7608.3
		PICH	5007.2		TOP3A	6212.5	1939.3	1939.3					PICH	8949		PICH	11688.7	7514.6	7514.6
		TOP3A	5580		TOP3A	6083.8	1810.6	1810.6					TOP3A	4089.5		PICH	13123.1	8949	8949
		PICH	5683		TOP3A	5233.7	960.5	960.5					PICH	7442.8		PICH	8949	4774.9	4774.9
		TOP3A	6212.5		TOP3A	6385.3	2112.1	2112.1					TOP3A	3851.7		PICH	7442.8	3268.7	3268.7
		PICH	4394.2		TOP3A	4608.4	335.2	335.2				deltaBLM_STB_ICRF 0.5uM_TOP3A-PICH-02.czi
		TOP3A	6083.8		PICH	3016.5	0					Background	PICH	779.4		TOP3A	2016.3	0
		PICH	5215.1		PICH	5007.2	1990.7	1990.7				Background	TOP3A	2016.3		TOP3A	2072.5	56.2	56.2
		TOP3A	5233.7		PICH	5683	2666.5	2666.5					PICH	1531.2		TOP3A	2188.6	172.3	172.3
		PICH	4922.8		PICH	4394.2	1377.7	1377.7					TOP3A	2072.5		TOP3A	2376.8	360.5	360.5
		TOP3A	6385.3		PICH	5215.1	2198.6	2198.6					PICH	2449.3		TOP3A	2277.8	261.5	261.5
		PICH	4428.5		PICH	4922.8	1906.3	1906.3					TOP3A	2188.6		TOP3A	2405	388.7	388.7
		TOP3A	4608.4		PICH	4428.5	1412	1412					PICH	3239.4		TOP3A	2409	392.7	392.7
	HAP1_STB_ICRF 0.5uM_TOP3A-PICH.czi												TOP3A	2376.8		TOP3A	2554.3	538	538
	Background	PICH	4005.1		TOP3A	4209.4	0						PICH	2645.7		TOP3A	2537.3	521	521
	Background	TOP3A	4209.4		TOP3A	5680.7	1471.3	1471.3					TOP3A	2277.8		TOP3A	2433.6	417.3	417.3
		PICH	5369.7		TOP3A	6259	2049.6	2049.6					PICH	3024.7		TOP3A	2309.9	293.6	293.6
		TOP3A	5680.7		PICH	4005.1	0						TOP3A	2405		TOP3A	2195.6	179.3	179.3
		PICH	6730.9		PICH	5369.7	1364.6	1364.6					PICH	3501.3		TOP3A	2578.3	562	562
		TOP3A	6259		PICH	6730.9	2725.8	2725.8					TOP3A	2409		PICH	779.4	0
	HAP1_STB_ICRF 0.5uM_TOP3A-PICH-03.czi												PICH	3195.4		PICH	1531.2	751.8	751.8
	Background	PICH	3511.9		TOP3A	3106.3	0						TOP3A	2554.3		PICH	2449.3	1669.9	1669.9
	Background	TOP3A	3106.3		TOP3A	3430.1	323.8	323.8					PICH	4828.3		PICH	3239.4	2460	2460
		PICH	5714.6		TOP3A	4112.2	1005.9	1005.9					TOP3A	2537.3		PICH	2645.7	1866.3	1866.3
		TOP3A	3430.1		TOP3A	4242.7	1136.4	1136.4					PICH	3377.4		PICH	3024.7	2245.3	2245.3
		PICH	6931.4		TOP3A	4562.5	1456.2	1456.2					TOP3A	2433.6		PICH	3501.3	2721.9	2721.9
		TOP3A	4112.2		TOP3A	3755	648.7	648.7					PICH	2166.2		PICH	3195.4	2416	2416
		PICH	6049.3		TOP3A	4161.7	1055.4	1055.4					TOP3A	2309.9		PICH	4828.3	4048.9	4048.9
		TOP3A	4242.7		TOP3A	4047.9	941.6	941.6					PICH	1642.2		PICH	3377.4	2598	2598
		PICH	6837.6		TOP3A	4347.4	1241.1	1241.1					TOP3A	2195.6		PICH	2166.2	1386.8	1386.8
		TOP3A	4562.5		TOP3A	4276	1169.7	1169.7					PICH	4587.3		PICH	1642.2	862.8	862.8
		PICH	5847.7		TOP3A	4291	1184.7	1184.7					TOP3A	2578.3		PICH	4587.3	3807.9	3807.9
		TOP3A	3755		TOP3A	3645.2	538.9	538.9				deltaBLM_STB_ICRF 0.5uM_TOP3A-PICH-03.czi
		PICH	6887.5		PICH	3511.9	0					Background	PICH	1121.2		TOP3A	2299.4	0
		TOP3A	4161.7		PICH	5714.6	2202.7	2202.7				Background	TOP3A	2299.4		TOP3A	2657.1	357.7	357.7
		PICH	7409.2		PICH	6931.4	3419.5	3419.5					PICH	3410.9		TOP3A	2811.3	511.9	511.9
		TOP3A	4047.9		PICH	6049.3	2537.4	2537.4					TOP3A	2657.1		TOP3A	2743	443.6	443.6
		PICH	7165.5		PICH	6837.6	3325.7	3325.7					PICH	3523.4		TOP3A	2560.9	261.5	261.5
		TOP3A	4347.4		PICH	5847.7	2335.8	2335.8					TOP3A	2811.3		PICH	1121.2	0
		PICH	6952.6		PICH	6887.5	3375.6	3375.6					PICH	3176		PICH	3410.9	2289.7	2289.7
		TOP3A	4276		PICH	7409.2	3897.3	3897.3					TOP3A	2743		PICH	3523.4	2402.2	2402.2
		PICH	6604.7		PICH	7165.5	3653.6	3653.6					PICH	3072.9		PICH	3176	2054.8	2054.8
		TOP3A	4291		PICH	6952.6	3440.7	3440.7					TOP3A	2560.9		PICH	3072.9	1951.7	1951.7
		PICH	4730.7		PICH	6604.7	3092.8	3092.8				deltaBLM_STB_ICRF 0.5uM_TOP3A-PICH-04.czi
		TOP3A	3645.2		PICH	4730.7	1218.8	1218.8				Background	PICH	1225.4		TOP3A	3035.5	0
	HAP1_STB_ICRF 0.5uM_TOP3A-PICH-04.czi											Background	TOP3A	3035.5		TOP3A	2501.2	-534.3	0
	Background	PICH	3686.9		TOP3A	4520.6	0						PICH	3142.3		TOP3A	2599.2	-436.3	0
	Background	TOP3A	4520.6		TOP3A	5255.8	735.2	735.2					TOP3A	2501.2		TOP3A	2717.6	-317.9	0
		PICH	7172.4		TOP3A	5801.8	1281.2	1281.2					PICH	2860.9		TOP3A	2764.3	-271.2	0
		TOP3A	5255.8		TOP3A	5137.8	617.2	617.2					TOP3A	2599.2		PICH	1225.4	0
		PICH	7367.1		PICH	3686.9	0						PICH	2961.6		PICH	3142.3	1916.9	1916.9
		TOP3A	5801.8		PICH	7172.4	3485.5	3485.5					TOP3A	2717.6		PICH	2860.9	1635.5	1635.5
		PICH	5870		PICH	7367.1	3680.2	3680.2					PICH	2748.9		PICH	2961.6	1736.2	1736.2
		TOP3A	5137.8		PICH	5870	2183.1	2183.1					TOP3A	2764.3		PICH	2748.9	1523.5	1523.5
	HAP1_STB_ICRF 0.5uM_TOP3A-PICH-07.czi											deltaBLM_STB_ICRF 0.5uM_TOP3A-PICH-05.czi
	Background	PICH	2339.5		TOP3A	2721.6	0					Background	PICH	1025.8		TOP3A	2271.7	0
	Background	TOP3A	2721.6		TOP3A	3202.4	480.8	480.8				Background	TOP3A	2271.7		TOP3A	2181.2	-90.5	0
		PICH	4309.3		TOP3A	3579	857.4	857.4					PICH	2745		TOP3A	2288.3	16.6	16.6
		TOP3A	3202.4		TOP3A	4056	1334.4	1334.4					TOP3A	2181.2		TOP3A	2209.9	-61.8	0
		PICH	4935.8		TOP3A	4121.7	1400.1	1400.1					PICH	6183.1		TOP3A	2127.4	-144.3	0
		TOP3A	3579		TOP3A	4442.7	1721.1	1721.1					TOP3A	2288.3		TOP3A	2297.4	25.7	25.7
		PICH	4869		TOP3A	4574.5	1852.9	1852.9					PICH	5374.3		PICH	1025.8	0
		TOP3A	4056		TOP3A	3239	517.4	517.4					TOP3A	2209.9		PICH	2745	1719.2	1719.2
		PICH	4171		PICH	2339.5	0						PICH	3543.6		PICH	6183.1	5157.3	5157.3
		TOP3A	4121.7		PICH	4309.3	1969.8	1969.8					TOP3A	2127.4		PICH	5374.3	4348.5	4348.5
		PICH	4826		PICH	4935.8	2596.3	2596.3					PICH	2698.3		PICH	3543.6	2517.8	2517.8
		TOP3A	4442.7		PICH	4869	2529.5	2529.5					TOP3A	2297.4		PICH	2698.3	1672.5	1672.5
		PICH	4855.6		PICH	4171	1831.5	1831.5				deltaBLM_STB_ICRF 0.5uM_TOP3A-PICH-06.czi
		TOP3A	4574.5		PICH	4826	2486.5	2486.5				Background	PICH	2055.9		TOP3A	4326.9	0
		PICH	4399.6		PICH	4855.6	2516.1	2516.1				Background	TOP3A	4326.9		TOP3A	4330.9	4	4
		TOP3A	3239		PICH	4399.6	2060.1	2060.1					PICH	4051.9		TOP3A	4379.9	53	53
	HAP1_STB_ICRF 0.5uM_TOP3A-PICH-08.czi												TOP3A	4330.9		TOP3A	4601.1	274.2	274.2
	Background	PICH	4143.2		TOP3A	4059	0						PICH	4083.5		TOP3A	4577.6	250.7	250.7
	Background	TOP3A	4059		TOP3A	5072.1	1013.1	1013.1					TOP3A	4379.9		TOP3A	4769.9	443	443
		PICH	5738		TOP3A	4992	933	933					PICH	4157.4		TOP3A	4768.8	441.9	441.9
		TOP3A	5072.1		TOP3A	4941.5	882.5	882.5					TOP3A	4601.1		PICH	2055.9	0
		PICH	7146.9		TOP3A	5133.7	1074.7	1074.7					PICH	4315.7		PICH	4051.9	1996	1996
		TOP3A	4992		TOP3A	4748.6	689.6	689.6					TOP3A	4577.6		PICH	4083.5	2027.6	2027.6
		PICH	6541.4		TOP3A	4778.1	719.1	719.1					PICH	4137.8		PICH	4157.4	2101.5	2101.5
		TOP3A	4941.5		TOP3A	4623.3	564.3	564.3					TOP3A	4769.9		PICH	4315.7	2259.8	2259.8
		PICH	5709		TOP3A	4554.9	495.9	495.9					PICH	4183.1		PICH	4137.8	2081.9	2081.9
		TOP3A	5133.7		PICH	4143.2	0						TOP3A	4768.8		PICH	4183.1	2127.2	2127.2
		PICH	5684.9		PICH	5738	1594.8	1594.8				deltaBLM_STB_ICRF 0.5uM_TOP3A-PICH-10.czi
		TOP3A	4748.6		PICH	7146.9	3003.7	3003.7				Background	PICH	725.4		TOP3A	2228.5	0
		PICH	5661.1		PICH	6541.4	2398.2	2398.2				Background	TOP3A	2228.5		TOP3A	2115.3	-113.2	0
		TOP3A	4778.1		PICH	5709	1565.8	1565.8					PICH	1635.5		TOP3A	2030.1	-198.4	0
		PICH	5363.6		PICH	5684.9	1541.7	1541.7					TOP3A	2115.3		TOP3A	2185.2	-43.3	0
		TOP3A	4623.3		PICH	5661.1	1517.9	1517.9					PICH	1558.8		TOP3A	1935.7	-292.8	0
		PICH	5168.4		PICH	5363.6	1220.4	1220.4					TOP3A	2030.1		TOP3A	2026.9	-201.6	0
		TOP3A	4554.9		PICH	5168.4	1025.2	1025.2					PICH	1971.3		TOP3A	2029.3	-199.2	0
	HAP1_STB_ICRF 0.5uM_TOP3A-PICH-09.czi												TOP3A	2185.2		TOP3A	2000.4	-228.1	0
	Background	PICH	3977		TOP3A	3871.5	0						PICH	2418.3		PICH	725.4	0
	Background	TOP3A	3871.5		TOP3A	4402.3	530.8	530.8					TOP3A	1935.7		PICH	1635.5	910.1	910.1
		PICH	5064.9		TOP3A	4581.1	709.6	709.6					PICH	2054.4		PICH	1558.8	833.4	833.4
		TOP3A	4402.3		TOP3A	4858.5	987	987					TOP3A	2026.9		PICH	1971.3	1245.9	1245.9
		PICH	6225		TOP3A	4976.8	1105.3	1105.3					PICH	1764.4		PICH	2418.3	1692.9	1692.9
		TOP3A	4581.1		TOP3A	4412.4	540.9	540.9					TOP3A	2029.3		PICH	2054.4	1329	1329
		PICH	4922.4		TOP3A	4438	566.5	566.5					PICH	2439.9		PICH	1764.4	1039	1039
		TOP3A	4858.5		PICH	3977	0						TOP3A	2000.4		PICH	2439.9	1714.5	1714.5
		PICH	5447.3		PICH	5064.9	1087.9	1087.9				deltaBLM_STB_ICRF 0.5uM_TOP3A-PICH-12.czi
		TOP3A	4976.8		PICH	6225	2248	2248				Background	PICH	1735.8		TOP3A	3058.6	0
		PICH	5899.8		PICH	4922.4	945.4	945.4				Background	TOP3A	3058.6		TOP3A	3079.6	21	21
		TOP3A	4412.4		PICH	5447.3	1470.3	1470.3					PICH	4835.7		TOP3A	3197.1	138.5	138.5
		PICH	5192.5		PICH	5899.8	1922.8	1922.8					TOP3A	3079.6		TOP3A	3043.3	-15.3	0
		TOP3A	4438		PICH	5192.5	1215.5	1215.5					PICH	4605.7		TOP3A	3055.9	-2.7	0
	HAP1_STB_ICRF 0.5uM_TOP3A-PICH-10.czi												TOP3A	3197.1		TOP3A	3095.2	36.6	36.6
	Background	PICH	3909.3		TOP3A	4161.5	0						PICH	7665.4		TOP3A	3057.7	-0.9	0
	Background	TOP3A	4161.5		TOP3A	5509	1347.5	1347.5					TOP3A	3043.3		TOP3A	3067.2	8.6	8.6
		PICH	7182.6		TOP3A	6324.5	2163	2163					PICH	7775.1		TOP3A	3144.7	86.1	86.1
		TOP3A	5509		TOP3A	5881.9	1720.4	1720.4					TOP3A	3055.9		PICH	1735.8	0
		PICH	7848.1		TOP3A	5572.1	1410.6	1410.6					PICH	6955.9		PICH	4835.7	3099.9	3099.9
		TOP3A	6324.5		TOP3A	6564.4	2402.9	2402.9					TOP3A	3095.2		PICH	4605.7	2869.9	2869.9
		PICH	6927.8		TOP3A	4846.6	685.1	685.1					PICH	6902.6		PICH	7665.4	5929.6	5929.6
		TOP3A	5881.9		PICH	3909.3	0						TOP3A	3057.7		PICH	7775.1	6039.3	6039.3
		PICH	6978.7		PICH	7182.6	3273.3	3273.3					PICH	6049.8		PICH	6955.9	5220.1	5220.1
		TOP3A	5572.1		PICH	7848.1	3938.8	3938.8					TOP3A	3067.2		PICH	6902.6	5166.8	5166.8
		PICH	7182.2		PICH	6927.8	3018.5	3018.5					PICH	5747.1		PICH	6049.8	4314	4314
		TOP3A	6564.4		PICH	6978.7	3069.4	3069.4					TOP3A	3144.7		PICH	5747.1	4011.3	4011.3
		PICH	5851.4		PICH	7182.2	3272.9	3272.9				deltaBLM_STB_ICRF 0.5uM_TOP3A-PICH-16.czi
		TOP3A	4846.6		PICH	5851.4	1942.1	1942.1				Background	PICH	1232.9		TOP3A	2504.3	0
	HAP1_STB_ICRF 0.5uM_BLM-PICH-11.czi											Background	TOP3A	2504.3		TOP3A	2243.8	-260.5	0
	Background	PICH	6752.6		TOP3A	6393.7	0						PICH	4154.7		TOP3A	2532	27.7	27.7
	Background	TOP3A	6393.7		TOP3A	6211.6	-182.1	0					TOP3A	2243.8		TOP3A	2399.7	-104.6	0
		PICH	8032.5		TOP3A	8901.3	2507.6	2507.6					PICH	4397.8		TOP3A	2433.6	-70.7	0
		TOP3A	6211.6		TOP3A	8820.8	2427.1	2427.1					TOP3A	2532		TOP3A	2517.9	13.6	13.6
		PICH	14405.7		TOP3A	8326.1	1932.4	1932.4					PICH	4122.4		TOP3A	2407.5	-96.8	0
		TOP3A	8901.3		TOP3A	8358.3	1964.6	1964.6					TOP3A	2399.7		TOP3A	2344.4	-159.9	0
		PICH	14310.5		TOP3A	8332.7	1939	1939					PICH	4235		TOP3A	2358.3	-146	0
		TOP3A	8820.8		TOP3A	8516.4	2122.7	2122.7					TOP3A	2433.6		PICH	1232.9	0
		PICH	12748.4		TOP3A	8358.9	1965.2	1965.2					PICH	5110.3		PICH	4154.7	2921.8	2921.8
		TOP3A	8326.1		TOP3A	8324.2	1930.5	1930.5					TOP3A	2517.9		PICH	4397.8	3164.9	3164.9
		PICH	11767.2		TOP3A	7160.5	766.8	766.8					PICH	3911.4		PICH	4122.4	2889.5	2889.5
		TOP3A	8358.3		TOP3A	5966.5	-427.2	0					TOP3A	2407.5		PICH	4235	3002.1	3002.1
		PICH	11714.6		TOP3A	8371.7	1978	1978					PICH	4088.6		PICH	5110.3	3877.4	3877.4
		TOP3A	8332.7		TOP3A	8357	1963.3	1963.3					TOP3A	2344.4		PICH	3911.4	2678.5	2678.5
		PICH	10862.1		PICH	6752.6	0						PICH	4938.3		PICH	4088.6	2855.7	2855.7
		TOP3A	8516.4		PICH	8032.5	1279.9	1279.9					TOP3A	2358.3		PICH	4938.3	3705.4	3705.4
		PICH	12992.6		PICH	14405.7	7653.1	7653.1				deltaBLM_STB_ICRF 0.5uM_TOP3A-PICH-17.czi
		TOP3A	8358.9		PICH	14310.5	7557.9	7557.9				Background	PICH	2001.5		TOP3A	3676	0
		PICH	15060.4		PICH	12748.4	5995.8	5995.8				Background	TOP3A	3676		TOP3A	4056.4	380.4	380.4
		TOP3A	8324.2		PICH	11767.2	5014.6	5014.6					PICH	7989.9		TOP3A	3700.9	24.9	24.9
		PICH	12855.5		PICH	11714.6	4962	4962					TOP3A	4056.4		TOP3A	4275.7	599.7	599.7
		TOP3A	7160.5		PICH	10862.1	4109.5	4109.5					PICH	6950		TOP3A	4006.2	330.2	330.2
		PICH	8063.3		PICH	12992.6	6240	6240					TOP3A	3700.9		TOP3A	3956.1	280.1	280.1
		TOP3A	5966.5		PICH	15060.4	8307.8	8307.8					PICH	7637.3		TOP3A	3856.1	180.1	180.1
		PICH	11263.1		PICH	12855.5	6102.9	6102.9					TOP3A	4275.7		TOP3A	4214.2	538.2	538.2
		TOP3A	8371.7		PICH	8063.3	1310.7	1310.7					PICH	7628.2		TOP3A	4035.5	359.5	359.5
		PICH	10690.2		PICH	11263.1	4510.5	4510.5					TOP3A	4006.2		TOP3A	4070.4	394.4	394.4
		TOP3A	8357		PICH	10690.2	3937.6	3937.6					PICH	8416.6		TOP3A	3889.9	213.9	213.9
													TOP3A	3956.1		TOP3A	3904.4	228.4	228.4
													PICH	7458.9		TOP3A	3961.1	285.1	285.1
													TOP3A	3856.1		TOP3A	3915.6	239.6	239.6
													PICH	11337.8		TOP3A	3948.4	272.4	272.4
													TOP3A	4214.2		PICH	2001.5	0
													PICH	10670.2		PICH	7989.9	5988.4	5988.4
													TOP3A	4035.5		PICH	6950	4948.5	4948.5
													PICH	9081.7		PICH	7637.3	5635.8	5635.8
													TOP3A	4070.4		PICH	7628.2	5626.7	5626.7
													PICH	8150.3		PICH	8416.6	6415.1	6415.1
													TOP3A	3889.9		PICH	7458.9	5457.4	5457.4
													PICH	7079.3		PICH	11337.8	9336.3	9336.3
													TOP3A	3904.4		PICH	10670.2	8668.7	8668.7
													PICH	7844		PICH	9081.7	7080.2	7080.2
													TOP3A	3961.1		PICH	8150.3	6148.8	6148.8
													PICH	6179.6		PICH	7079.3	5077.8	5077.8
													TOP3A	3915.6		PICH	7844	5842.5	5842.5
													PICH	8537.2		PICH	6179.6	4178.1	4178.1
													TOP3A	3948.4		PICH	8537.2	6535.7	6535.7

## Sheet: HeLaGFPTOP3A siBLM RawData
	HeLa GFP-TOP3A ICRF-193 siCTRL											HeLa GFP-TOP3A ICRF-193 siBLM
	HeLa GFP-TOP3A siCTRL GFP-BLM-PICH.czi			Area	Mean	StdDev	Min	Max	Length			HeLa GFP-TOP3A siBLM GFP-BLM-PICH.czi			Area	Mean	StdDev	Min	Max	Length
	Background	PICH	1	0.4	6168.1	455.9	5500.4	7028.5	5.5			Background	PICH	1	0.3	5999.8	347.5	5486.7	6730.1	3.9
	Background	BLM	2	0.4	4792.7	336.2	4236.8	5487.7	5.5			Background	BLM	2	0.3	3792.6	298.5	3302.4	4485.3	3.9
	Background	TOP3A	3	0.4	5738.9	299.2	5192.7	6233.4	5.5			Background	TOP3A	3	0.3	6158.5	94.5	5986.5	6408.6	3.9
			4	0.3	12385.3	1222.8	10384.2	15086.7	4.7					4	0.1	11725.4	1657	8624.2	13818.3	2.2
			5	0.3	7166.6	915.8	4942.7	8272.8	4.7					5	0.1	3558.8	352	3130.3	4283.2	2.2
			6	0.3	7060.8	379.9	6101.4	7552.3	4.7					6	0.1	6439.5	159.7	6104.6	6674.4	2.2
			7	0.3	12526.8	974.4	10766.6	14881.4	4.9					7	0.1	14835.5	1232.1	11115	16697.5	1.8
			8	0.3	6601.1	565.7	5492	7424.1	4.9					8	0.1	3574.3	166.4	3349.5	3939.9	1.8
			9	0.3	6973.6	368	6007.1	7485.4	4.9					9	0.1	6411.6	191.3	6149.5	6732.2	1.8
			10	0.3	11506	586.5	10494.4	12701.4	4.3					10	0.1	16918.2	1884	12511.8	19404.5	1.8
			11	0.3	7132.5	837	4957.6	8197.4	4.3					11	0.1	3661	271.4	3168.8	4077.7	1.8
			12	0.3	7106.2	381.7	6118	7540.7	4.3					12	0.1	6557.3	151.4	6243.5	6779.4	1.8
			13	0.3	14980	1717.6	12064.4	17190.1	5					13	0.4	12578.2	1900.3	8569	16405.1	6.2
			14	0.3	7638.7	891.2	5817.3	9519.7	5					14	0.4	3243.9	386.2	2720.9	4131.5	6.2
			15	0.3	7565.5	450	6483.3	8311.7	5					15	0.4	6255.5	181.1	5847	6644.4	6.2
			16	0.4	16881	1961	10160.9	19809.6	5.9					16	0.1	14049.2	1288.7	10744	15859.5	1.9
			17	0.4	7714.5	868.1	5374.6	9049.9	5.9					17	0.1	3414.3	359.6	2919.5	4098.9	1.9
			18	0.4	7322	350	6422	7811.1	5.9					18	0.1	6294	183	5997.9	6566.2	1.9
			19	0.3	15379.9	2060.9	10806.7	20116.5	4.1					19	0.1	18329.7	3165.1	13157.5	24481	2.3
			20	0.3	7303.6	965.5	5311.1	8460.3	4.1					20	0.1	3798.5	423.9	3056	4606.4	2.3
			21	0.3	7275.4	288.2	6705.2	7729.3	4.1					21	0.1	6363.2	123.8	6147.2	6589.6	2.3
			22	0.5	14672.3	2127.5	11253.4	21498	8.4					22	0.1	17648.8	4626.6	9623.2	23244	2.2
			23	0.5	7633.4	1080.7	5103.5	9432.9	8.4					23	0.1	3144.2	300.8	2656.8	3593.9	2.2
			24	0.5	7403.4	508.3	6252	9633	8.4					24	0.1	6402.5	309.4	5852.5	6959.9	2.2
			25	0.5	15798.9	3315.4	9927.5	22483.1	8					25	0.2	17672.5	4632.8	10920	24818.5	3.3
			26	0.5	7412	1096.5	4771	9329.6	8					26	0.2	3345.8	351.4	2730.8	3862.7	3.3
			27	0.5	7316.7	507.1	5965.2	8444	8					27	0.2	6443.3	269.7	5942.4	6913	3.3
			28	0.3	14821.6	2155.3	11540.7	17905	5.2					28	0.1	20271.8	1301.4	16601.9	21924.2	1.7
			29	0.3	7271.6	745.7	5905.8	8603.1	5.2					29	0.1	4248.7	430	3330	4818	1.7
			30	0.3	7469.2	481.4	6596.3	8224.7	5.2					30	0.1	6567.9	108.9	6353	6798.2	1.7
			31	0.3	14867.6	2084.8	10519.8	17433.9	4.4					31	0.2	17503.3	3140.5	13956.9	22779.7	2.8
			32	0.3	7098.7	769.9	5286.2	8133.1	4.4					32	0.2	3768.6	330.3	3111.5	4442.1	2.8
			33	0.3	7308.2	311.9	6621.2	7869.1	4.4					33	0.2	6584.2	145.4	6271	6867.9	2.8
			34	0.3	15966.6	3305	10705	23516.4	4.7					34	0.3	12884.1	1936.4	10388.2	17244.7	4.2
			35	0.3	7129.7	776.6	5735	8279.6	4.7					35	0.3	3276.9	363.5	2802.6	4372.2	4.2
			36	0.3	7022.2	308.9	6342.5	7485.5	4.7					36	0.3	6274.1	211.2	5924	6745.5	4.2
			37	0.2	13394.9	1971.6	9949.8	16667.9	2.7			HeLa GFP-TOP3A siBLM GFP-BLM-PICH-02.czi
			38	0.2	6753.7	416.5	5791.5	7353.5	2.7					1	0.5	7445.8	383.1	6672.9	8326.3	7.6
			39	0.2	7006.9	194.5	6625.1	7364	2.7					2	0.5	4830.7	430.4	4085.3	6176.9	7.6
	HeLa GFP-TOP3A siCTRL GFP-BLM-PICH-02.czi													3	0.5	6520.3	162.7	6186.3	6828.8	7.6
			1	0.4	6238.2	386.4	5313	7134.5	5.6					4	0.1	10441.1	733.6	9302.2	12003.6	1.9
			2	0.4	4258.4	285.8	3611.5	4880.5	5.6					5	0.1	5160.7	372.9	4648.8	5914.3	1.9
			3	0.4	6363.2	337.4	5570.9	6908.8	5.6					6	0.1	6748.4	127.6	6354.3	6918.7	1.9
			4	0.2	15588	1312.3	13293.2	19070.6	3.5					7	0.5	12214.3	1168.6	9750.8	14525.5	7.9
			5	0.2	6761.3	545.5	5866.3	8217.7	3.5					8	0.5	4990.9	556.5	3585.1	6306.1	7.9
			6	0.2	7738.5	304.6	7086.4	8717.3	3.5					9	0.5	6811.9	245.1	6127.5	7155.4	7.9
			7	0.3	17121.5	1293.7	13855	19857.2	5.2					10	0.4	13817.5	984.1	12169.2	15691.6	6.2
			8	0.3	6826	899	4766	8126.7	5.2					11	0.4	5273.6	270.4	4615.8	5805.6	6.2
			9	0.3	7630.9	415.1	6777.6	8300.7	5.2					12	0.4	6916.6	125.5	6428.5	7192.6	6.2
			10	0.3	22254.3	2258.1	16853.9	26316.5	4.2					13	0.4	15250.7	1223.9	12732.8	17617.4	6.7
			11	0.3	7585	669.1	6145.6	8823.3	4.2					14	0.4	5269.4	443.2	4239.1	6373.5	6.7
			12	0.3	7849.3	291.3	7338.4	8308	4.2					15	0.4	6816.2	204.9	6309.2	7121.2	6.7
			13	0.5	15412.8	3805	9487.2	21768.3	7.8					16	0.2	13221.4	760.9	11963.8	14649.1	2.4
			14	0.5	6124.2	1047.1	4364.7	7950.8	7.8					17	0.2	4891	218.6	4601.3	5357	2.4
			15	0.5	7547.3	431.8	6709.1	8490.2	7.8					18	0.2	6757.1	77.2	6582	6955.9	2.4
			16	0.4	15957.1	1857.9	11326.7	19057.5	5.7					19	0.4	15439.9	1237.7	12214	18006	5.8
			17	0.4	6319.9	803.4	5066.1	7715.1	5.7					20	0.4	4906.3	414.9	4230.6	5937.8	5.8
			18	0.4	7603.6	318.6	6993.5	8237.8	5.7					21	0.4	6731.2	155.1	6339	6980.4	5.8
			19	0.4	17822.1	4069.2	10192.5	24061	6.2					22	0.2	12384.3	641.9	11139.7	13342.8	3.3
			20	0.4	6462.7	1005.2	4993	8417.1	6.2					23	0.2	4763.5	219.9	4409.2	5263.8	3.3
			21	0.4	7597	374.4	6824	8391.5	6.2					24	0.2	6714.8	77.6	6512.2	6872.1	3.3
			22	0.4	22329.5	6768.4	9850.3	30828.8	5.6			HeLa GFP-TOP3A siBLM GFP-BLM-PICH-04.czi
			23	0.4	7093.9	1485.8	4606	9219.4	5.6					1	0.4	5087.3	742.9	4083.9	6681.1	6.8
			24	0.4	7716.9	507.8	6835.5	8426.5	5.6					2	0.4	3109.8	919.8	2199.9	5495.1	6.8
			25	0.2	24733.7	4431	15913.1	31917.1	3.6					3	0.4	3162	142.2	2906.6	3446.5	6.8
			26	0.2	8453.1	1107.7	6019.4	9913	3.6					4	0.3	9878.2	1671	7551.8	14359.9	4.3
			27	0.2	8245.7	347.4	7528.7	9173.2	3.6					5	0.3	3231	695.2	2358.2	4712.6	4.3
			28	0.3	21575.8	2532.7	15321.9	25071	4.8					6	0.3	3381	287.5	2879	3917	4.3
			29	0.3	7774.9	1171	5757.5	9728	4.8					7	0.2	13791.9	502	12593.1	14387.4	2.7
			30	0.3	7854	216.7	7136.2	8150.9	4.8					8	0.2	3704.7	382.9	3063.6	4438.4	2.7
			31	0.4	20947.3	3848.9	13198.2	25798.2	5.6					9	0.2	3625.6	155.7	3194.8	3880.8	2.7
			32	0.4	7402.8	1339.5	5138.8	9623.4	5.6					10	0.3	13924.9	2358.1	8009.5	17510.4	5
			33	0.4	7772.8	346.4	7072.5	8440.7	5.6					11	0.3	3311.3	687	2174.6	4458.6	5
			34	0.3	20842.2	3425.9	12591	25569.7	5.1					12	0.3	3341.8	315.6	2803.3	3800.5	5
			35	0.3	7379.3	1302.2	4805.2	9408.3	5.1					13	0.3	12209.6	2329.2	9060.7	16411.5	4.6
			36	0.3	7738.2	486.8	6886.1	8657.8	5.1					14	0.3	3249.4	312.4	2701.1	3770.7	4.6
			37	0.3	19436.4	4111.7	12253.6	25886.3	4.3					15	0.3	3332.9	154.3	3052.6	3690	4.6
			38	0.3	6944.7	1129.4	5159.9	9117.7	4.3			HeLa GFP-TOP3A siBLM GFP-BLM-PICH-05.czi
			39	0.3	7443.8	411.7	6699	7995.8	4.3					1	0.3	6907.2	423.1	6186.4	8077.6	5
			40	0.2	15583.1	2488.6	11903.2	19903.4	2.8					2	0.3	4975.7	425.5	4110.7	5923.5	5
			41	0.2	6365.6	666.6	5385.4	7493.8	2.8					3	0.3	11398.3	223.3	10832.5	11961.9	5
			42	0.2	7461.3	237.1	7012.3	7852	2.8					4	0.2	12320.6	2545.3	8314	16958.6	3.2
	HeLa GFP-TOP3A siCTRL GFP-BLM-PICH-03.czi													5	0.2	3613.7	518.6	2961	4796.1	3.2
			1	0.2	7741.6	311.6	7228.8	8249.8	3.6					6	0.2	10509	589	9488	11568.5	3.2
			2	0.2	5792.7	391	4712.7	6431.6	3.6					7	0.3	15828	3344	11137.5	21181.1	4.5
			3	0.2	3579.3	115	3378.8	3810.5	3.6					8	0.3	4291	562	3308.5	5603.2	4.5
			4	0.4	11765	824.7	10020.7	13424.4	6.3					9	0.3	10859.1	527.7	9943.8	11594.6	4.5
			5	0.4	8598.1	982.6	6093	10292.7	6.3					10	0.2	18643.9	4661.3	12417	26250.8	3.4
			6	0.4	4446.5	244	3588	4750.4	6.3					11	0.2	4584.2	798.7	3252.4	6078.5	3.4
			7	0.4	20019.6	2037.6	15303.6	23224.2	5.7					12	0.2	11188	676	9847.3	12009.5	3.4
			8	0.4	10197.5	759.5	8244	11699	5.7					13	0.3	15713.1	4408.1	8368.5	22381.4	5.3
			9	0.4	5102.6	300.9	4210.2	5584.5	5.7					14	0.3	4514.8	898	3208.4	6385.4	5.3
			10	0.4	16453.7	1247.8	13773.3	18359.2	5.4					15	0.3	11018.8	720.1	9802	12010.3	5.3
			11	0.4	10635.9	943.9	7970	12050.4	5.4					16	0.3	19247.4	3034.5	12348	23057.7	3.9
			12	0.4	4932.1	255.9	4189.9	5290.8	5.4					17	0.3	4695	504.1	3707.5	5590.8	3.9
			13	0.4	12727.9	850.4	11219.7	14772	6					18	0.3	11485.9	270.9	10904.5	11907.4	3.9
			14	0.4	8885.7	1564.7	5425.2	10565.8	6					19	0.2	16037.7	2422.3	9893.5	18998.4	3.7
			15	0.4	4684.4	501.5	3538	5340.6	6					20	0.2	4564.2	367.7	3742.5	5630.9	3.7
			16	0.5	14257.5	1589.2	11014.4	16676.2	7.3					21	0.2	11319.6	360.5	10161.5	11737.4	3.7
			17	0.5	8965.9	1656.5	5550	11070.5	7.3					22	0.2	19554.4	3233.6	12672	24118.6	3.7
			18	0.5	4522.2	469.6	3533.6	5229.3	7.3					23	0.2	4371.1	562.7	3100.7	5478.1	3.7
			19	0.1	17690.1	707.2	16277.4	18875.1	2					24	0.2	10766.4	463.3	9621.8	11224.8	3.7
			20	0.1	10382.7	629.6	8786.5	11157.6	2					25	0.2	22921	5570.3	10357.5	31922	3.5
			21	0.1	4690.9	107.4	4439.8	4874.8	2					26	0.2	3870	441.4	2917.5	4546.4	3.5
			22	0.3	13663.6	1769.2	9258	16554.8	5.1					27	0.2	10529.4	366.1	9476.5	11062.6	3.5
			23	0.3	8979.6	888.8	6752.8	10599.2	5.1					28	0.2	22277.2	4510.3	13193.2	27740.6	3.5
			24	0.3	4679.4	291.2	3937.5	5184.2	5.1					29	0.2	3835.5	501.5	3186.5	5009.3	3.5
			25	0.3	12592.6	1127.9	11022.6	14953.4	4.3					30	0.2	10617.1	295.5	9875.5	11055.7	3.5
			26	0.3	8319.1	701.9	6294	9751.1	4.3					31	0.2	16197.4	2220.7	13009.3	20469.9	3.1
			27	0.3	4300.8	257.1	3734.1	4658.5	4.3					32	0.2	3729.9	370.3	3108.8	4775.6	3.1
	HeLa GFP-TOP3A siCTRL GFP-BLM-PICH-04.czi													33	0.2	10471.1	406.8	9831.2	11140.3	3.1
			1	0.4	5034.3	554.4	4211.4	6490.5	5.6					34	0.3	13422.9	1610.6	10725	17207.1	4.4
			2	0.4	4103.3	318.4	3674.5	4786.9	5.6					35	0.3	3993.2	448	3150.7	4946.3	4.4
			3	0.4	3335.9	131.8	3080	3627	5.6					36	0.3	10851.2	303.8	10318.6	11367.5	4.4
			4	0.3	11604.7	934.2	8847	13521.2	4.3			HeLa GFP-TOP3A siBLM GFP-BLM-PICH-06.czi
			5	0.3	6558.5	764.1	4935.5	8362.7	4.3					1	0.4	9825.8	706	8219.1	10700.5	6.1
			6	0.3	4261	165.3	3787.4	4464.7	4.3					2	0.4	6048.7	560.8	5195.7	7734.2	6.1
			7	0.3	15002.6	1718.2	12465.8	18620.1	4.7					3	0.4	12739.1	221.7	12175.2	13110.9	6.1
			8	0.3	7308.1	848.9	5412.3	8599.4	4.7					4	0.1	14270.6	950.3	12310.2	16221.4	1.6
			9	0.3	4524	190.6	4140.7	4937	4.7					5	0.1	5204.7	216.1	4810.2	5772.7	1.6
			10	0.2	12627.9	640.4	11717.2	14641.7	2.6					6	0.1	12808.2	114.9	12588.8	13065.7	1.6
			11	0.2	6591.5	671.5	5418.6	7875.3	2.6					7	0.2	15826.9	1412.9	13265.2	18209.5	2.5
			12	0.2	4629.8	266.2	4240.8	5282.2	2.6					8	0.2	5900	797.3	4584.8	7666.3	2.5
			13	0.1	7938.7	769.1	6493.6	9092.4	2.2					9	0.2	12899.9	153.7	12397.5	13125.2	2.5
			14	0.1	5412.4	1022.2	3832.7	7123.7	2.2					10	0.2	16146.2	2227	12709.7	19413.4	2.8
			15	0.1	4304.6	343.2	3670.5	4817.9	2.2					11	0.2	6047.5	931.2	4432	7332.4	2.8
			16	0.3	10607.2	1941.3	7398	13136.7	4.9					12	0.2	12827.5	226.4	12318	13195.8	2.8
			17	0.3	5927.9	1220.9	3875.1	7893.3	4.9					13	0.2	19488.1	2795.6	14271.3	24712.2	3.2
			18	0.3	4056.1	371.6	3509	5166.2	4.9					14	0.2	5877.6	492.3	5041.8	6808.9	3.2
			19	0.1	11631.1	1680.9	9631.4	14908.2	2.2					15	0.2	13047.6	223.4	12654.8	13622	3.2
			20	0.1	6676.1	453.5	6008.6	7515.5	2.2					16	0.2	20601.7	3694.8	13052.6	25086.8	2.9
			21	0.1	4480.4	149.5	4195.5	4861.7	2.2					17	0.2	6009.8	795.9	5002	7777.6	2.9
	HeLa GFP-TOP3A siCTRL GFP-BLM-PICH-05.czi													18	0.2	13102.6	277.1	12699.5	13682.9	2.9
			1	0.2	8452.1	313.7	7679.3	8924.3	3.8					19	0.1	20544.2	3210	14201	24632.1	2.2
			2	0.2	5813.2	326.4	5246.2	6633.2	3.8					20	0.1	6171	531.5	5099.5	7102.1	2.2
			3	0.2	3648.4	73	3500.9	3871.7	3.8					21	0.1	13236.6	251.9	12777.1	13704.4	2.2
			4	0.5	17178.1	3489.5	12042.4	25167.8	7.3					22	0.2	17392	2301.4	11828.1	21166.6	3.6
			5	0.5	7743.9	768.3	5895.2	8998.2	7.3					23	0.2	5987.7	563.5	5203.1	7232.1	3.6
			6	0.5	4147.3	238.4	3492.3	4572.2	7.3					24	0.2	12962.3	372.4	12341.3	13583.6	3.6
			7	0.2	16745.9	1511.9	13696	19733.7	3.5					25	0.2	21676.3	3925.7	14705.5	27026.3	3.8
			8	0.2	7656.2	527.4	6259	8638.5	3.5					26	0.2	5404.8	771.4	4279.3	7304	3.8
			9	0.2	4308.7	128.4	4079.5	4627	3.5					27	0.2	12898.5	299	12268.9	13420	3.8
			10	0.3	20895.1	2629.4	13919.2	25064.3	4.7					28	0.2	22395.3	1533.4	17734	24386.4	2.5
			11	0.3	7893.4	888.5	5460.5	9536.1	4.7					29	0.2	5673.3	603	4630	6679.3	2.5
			12	0.3	4298.5	307.1	3604.2	4824.4	4.7					30	0.2	12919.8	404.5	11883	13638.4	2.5
			13	0.1	17399	1890.7	12716.5	19886.1	1.1					31	0.2	25215.1	2261	18502	27301.9	2.3
			14	0.1	7681.3	267.9	7267.5	8059.4	1.1					32	0.2	5953.8	595.1	4756.4	6700.9	2.3
			15	0.1	4364.4	71.9	4185.5	4481.4	1.1					33	0.2	12906.9	297.8	12434.3	13519	2.3
	HeLa GFP-TOP3A siCTRL GFP-BLM-PICH-06.czi													34	0.2	20693.2	2248.4	15025.7	23045.1	3.6
			1	0.2	6412.1	345.1	5811.4	7128.3	3.3					35	0.2	6092.3	523.5	5240	7243.5	3.6
			2	0.2	6007	864.9	4768.3	7692.8	3.3					36	0.2	12913.5	263.8	12298.6	13439	3.6
			3	0.2	11644.9	527	10563.9	12568.2	3.3					37	0.3	18111.2	2682.3	12379.1	21495.1	5
			4	0.3	17327.1	1927.5	13546.7	20833.4	4.8					38	0.3	5554.4	534.6	4719.4	6896.1	5
			5	0.3	11021.4	784.9	9271.3	12648.7	4.8					39	0.3	12524.2	336.2	11955.6	13201.3	5
			6	0.3	16322.5	530.2	15075.9	17280.4	4.8					40	0.2	21755.7	3634.3	15069.9	28208.1	3.6
			7	0.1	16986.4	1567.1	14210.8	19534.7	1.7					41	0.2	5276.7	370.8	4761.6	6111.4	3.6
			8	0.1	10733.8	574.1	9610.1	11471.2	1.7					42	0.2	12544.5	245.1	12083.6	13215.7	3.6
			9	0.1	15977.2	289.6	15387.5	16580.5	1.7			HeLa GFP-TOP3A siBLM GFP-BLM-PICH-07.czi
			10	0.1	20608.6	1436	16971	22460.1	1.7					1	0.4	7626.4	387.1	6806	8553.5	5.9
			11	0.1	11299.1	905.7	10057	12910.5	1.7					2	0.4	4367.6	304.1	3640	5142.7	5.9
			12	0.1	15898	172.6	15558	16218.3	1.7					3	0.4	12605.6	128.7	12328	12961.2	5.9
			13	0.3	17384.2	2495.7	12880.2	22716.1	4.6					4	0.4	13945.7	1927	11207.4	17029.1	5.5
			14	0.3	9726	1147.9	7357.9	11550	4.6					5	0.4	3989.2	358.9	3634.8	5406.9	5.5
			15	0.3	15364.8	772.5	13552.2	16449.6	4.6					6	0.4	12486.2	215	12091.7	13244	5.5
			16	0.2	25842.4	3541.2	17402	30791	2.4					7	0.2	15771.3	911.5	14172	17816.8	3.1
			17	0.2	11310.9	1026.1	8759	12821.9	2.4					8	0.2	4653	411.4	4035.9	5594.2	3.1
			18	0.2	15804.9	533.4	14462	16426	2.4					9	0.2	12742.8	197.5	12260.1	13141.1	3.1
			19	0.2	23737.8	3003.2	17229.8	29247.2	2.9					10	0.3	16601.7	2540.2	11510.6	20908.6	4.8
			20	0.2	11360.5	957.3	8966.2	13127.5	2.9					11	0.3	4481.8	533.4	3568.1	5845.5	4.8
			21	0.2	16294.4	505	15191.5	17097.1	2.9					12	0.3	12705.5	224.1	12120	13109.8	4.8
			22	0.2	19259.5	983.8	15933.3	20925	2.7					13	0.2	18656.2	2134.5	13484	21691.2	3.5
			23	0.2	10775.7	1097.1	7976.4	12346	2.7					14	0.2	4917.3	462.4	3754.6	5880.8	3.5
			24	0.2	15697.2	775.2	14050.9	16736.9	2.7					15	0.2	12826.4	232.2	12275.8	13204.8	3.5
			25	0.3	18439.3	2162.6	13735.4	22149.2	4.5					16	0.2	22178.8	2053.7	17731.5	25330.8	3.5
			26	0.3	10686.2	856.8	8663.5	12578.3	4.5					17	0.2	4446.9	314.3	3803.8	4925	3.5
			27	0.3	15521.7	551.4	14280.9	16310.4	4.5					18	0.2	12777.3	191.4	12433.4	13141.3	3.5
			28	0.3	14869.2	1713.7	11714.6	17361	4.3					19	0.3	18369.5	3213.6	12996.5	23601.5	4.1
			29	0.3	8671.1	842.4	7073.3	9916.2	4.3					20	0.3	4277	274.9	3892.8	5011.8	4.1
			30	0.3	14675.3	665.3	13365.7	15890.2	4.3					21	0.3	12641.5	124.2	12441.9	12988.7	4.1
	HeLa GFP-TOP3A siCTRL GFP-BLM-PICH-07.czi													22	0.1	16337.2	1719.7	12595	18271.5	2.3
			1	0.4	7191.3	683.6	6105.7	8650.7	6.1					23	0.1	4634.1	302.6	4185.1	5326.2	2.3
			2	0.4	6507.4	787	5082	7955.3	6.1					24	0.1	13043.9	128.2	12744.4	13275.5	2.3
			3	0.4	9775.6	437	9084.9	10594.4	6.1					25	0.2	19550.5	2313.7	13316	21606.8	3.2
			4	0.4	14471.4	1660.5	10297.8	17171.7	6.4					26	0.2	4811.1	478.2	4090.7	6088.4	3.2
			5	0.4	8744.7	1366.5	5743.1	11267.1	6.4					27	0.2	13188.3	197.7	12776	13685.1	3.2
			6	0.4	11944.5	627.4	10177.9	12961	6.4					28	0.2	25887.8	4534.9	15054	31155.3	3.3
			7	0.3	15566.9	966.9	13964.7	18042.7	4.5					29	0.2	4989.3	520.9	3909	6285.6	3.3
			8	0.3	9725.1	1566.2	6775	12318.4	4.5					30	0.2	13135.1	267.7	12634	13640.6	3.3
			9	0.3	12067.6	607.6	10789.9	12853.8	4.5					31	0.3	22234.7	6337	10869.5	31002.2	5.3
			10	0.4	18470.8	1743.9	14540.8	21490.3	6					32	0.3	4711.2	642.4	3663.9	6369.5	5.3
			11	0.4	11257.7	1936.9	6814.2	14803.3	6					33	0.3	12971.1	334.2	12361.9	13754	5.3
			12	0.4	12552.9	812.4	10628.2	13603.8	6					34	0.3	17900.9	7021	10696.1	30129.6	4.4
			13	0.5	22053.5	3136.9	16234.5	33301.3	7.4					35	0.3	4387.2	602.2	3633.4	5486.7	4.4
			14	0.5	12067	2178.9	7090	16056.6	7.4					36	0.3	12905.6	328.9	12392.1	13455.8	4.4
			15	0.5	12823.2	975.4	10377.5	14218.8	7.4					37	0.2	17924	1508.5	13870.1	19719.5	2.8
			16	0.4	19418.3	2483.4	12980	24773.7	6.5					38	0.2	4489	422.3	3848.6	5380.6	2.8
			17	0.4	12159.5	2225.7	7074	15727.3	6.5					39	0.2	12730.9	319.3	11958.4	13218.4	2.8
			18	0.4	12897.8	940.7	10736	14363.7	6.5					40	0.1	15214.7	1048.4	13090.9	16572.5	1.5
			19	0.4	18265.9	2401.3	13673	21825	6.3					41	0.1	4664.7	499.3	4160.8	5641.4	1.5
			20	0.4	11273.5	2051.4	7251.9	14676.3	6.3					42	0.1	12780.6	111.7	12573	12956.3	1.5
			21	0.4	12611.3	818.9	11019.2	13996.9	6.3			HeLa GFP-TOP3A siBLM GFP-BLM-PICH-08.czi
			22	0.4	17193.5	1547	11559	20074.2	6.1					1	0.4	7331.3	361.8	6574.2	7999	5.4
			23	0.4	10763	1951.9	6110.6	13932.6	6.1					2	0.4	4716.3	255.4	4246.5	5259.2	5.4
			24	0.4	12673.5	681.7	10854.1	13692	6.1					3	0.4	10187.3	113.1	9973.5	10487	5.4
			25	0.4	18768.4	3126.5	11152.5	23491	6.4					4	0.3	15538.6	1839.1	10886	19284.6	4.7
			26	0.4	10535.6	2030.1	6791.2	13945.7	6.4					5	0.3	4327	460.8	3416	5256.7	4.7
			27	0.4	12407	696.7	10766.4	13305.2	6.4					6	0.3	10202.6	395.7	9322	10759	4.7
			28	0.4	19205.5	2487.1	11135.1	23999.9	6.9					9	0.2	22691.7	1257.7	19206	24581.1	3.7
			29	0.4	10492.2	1588.2	6494.3	12498	6.9					10	0.2	4605.1	261.3	4043	5241.2	3.7
			30	0.4	12611.3	758	10795.8	14058.4	6.9					11	0.2	10652.2	301.7	9925	11218.6	3.7
			31	0.5	14965.1	1644.7	11539.9	17520.6	6.9					12	0.3	17247	5372.6	9662.5	23929.5	4.4
			32	0.5	9030.8	1597.9	5842	11100.6	6.9					13	0.3	4603.3	326.6	3800.2	5200.6	4.4
			33	0.5	12012.7	784.9	10287.3	12992.9	6.9					14	0.3	10611.9	318.5	10134.2	11197.9	4.4
			34	0.1	15739.9	1384	12024.8	17067.6	1.4					15	0.1	15433.3	2422.8	13318.5	20389.4	2
			35	0.1	9535.5	201.3	9252.3	9982.6	1.4					16	0.1	4821.4	481.2	4067.3	5694	2
			36	0.1	12331.6	237.9	11889.1	12898	1.4					17	0.1	10692.3	122.5	10399.6	10925.2	2
	HeLa GFP-TOP3A siCTRL GFP-BLM-PICH-08.czi													18	0.3	15531.1	2873.9	11763.7	22910.2	5.2
			1	0.3	6926	397.3	6075.6	7771.7	4.2					19	0.3	4921.5	550.9	3970.5	6070.7	5.2
			2	0.3	4595.4	560.7	3722.3	6637.4	4.2					20	0.3	10720.8	262.5	10175.6	11244.3	5.2
			3	0.3	6468.6	172.4	6092.6	6837.9	4.2					21	0.2	15046.3	1405.3	12947.7	17224.7	2.4
			4	0.3	17677.4	3058.1	11355.2	22374.7	4					22	0.2	4973.9	556.9	3995.5	5723.1	2.4
			5	0.3	6063.2	347.9	5356.5	6762.9	4					23	0.2	10891.3	290.5	10310.1	11357.7	2.4
			6	0.3	6949.5	211.7	6633.4	7424.4	4			HeLa GFP-TOP3A siBLM GFP-BLM-PICH-09.czi
			7	0.3	16057.2	2177.4	11692	20057.1	4.3					1	0	7522.7	201.7	7231.6	7753.9	0.4
			8	0.3	6211.2	616.5	4988	7154.7	4.3					2	0	4791.5	377	4436.6	5365.9	0.4
			9	0.3	7157.7	135.2	6739.9	7429.9	4.3					3	0	8499.1	77	8244.9	8593.6	0.4
			10	0.3	15076.6	2953.7	9520.4	20754.7	5					4	0.1	21210.3	3266.4	13865	24895.7	2.2
			11	0.3	5906.5	518.9	4815.2	7148	5					5	0.1	4971.5	591.1	4076	6039.8	2.2
			12	0.3	7148.4	203.3	6747	7776.2	5					6	0.1	8797.8	358.3	8189	9465	2.2
			13	0.3	17887.9	5598.8	9864.6	29740.7	4.8					7	0.3	27128.4	6686.7	14669.9	36415.8	4
			14	0.3	6059.6	1020.8	4468.4	8385.5	4.8					8	0.3	5546.5	618.8	4620	6530.2	4
			15	0.3	7172	372.3	6423	7865.5	4.8					9	0.3	9300.3	277.6	8558.6	9722.3	4
			16	0.3	22194.3	7285.1	11178.1	35776.5	5					10	0.3	23278	4730.7	13796	29686.4	4.8
			17	0.3	6636.7	1717.4	3803	10366.4	5					11	0.3	5539.2	572.5	4228.2	6390	4.8
			18	0.3	7307.7	533.4	6242.6	8010.5	5					12	0.3	9161	402.3	8279.9	9818.1	4.8
			19	0.3	20962.5	4422.3	13842.7	26593.8	4.1					13	0.2	23356.1	3248	13901.8	26441.8	3.6
			20	0.3	7332	1011	4836.1	8937.3	4.1					14	0.2	5744.6	663.7	4394.5	7069.7	3.6
			21	0.3	7491.6	364	6591.1	7975.3	4.1					15	0.2	9309.9	302.8	8574.5	9694.9	3.6
			22	0.4	18415.5	3362.9	12693.2	24339.5	5.5					16	0.2	20294	3140.9	13252.4	23880.1	3.3
			23	0.4	6812.3	1076	4870.9	9682	5.5					17	0.2	5919	563.4	4692.4	6975	3.3
			24	0.4	7462.3	296.7	6699.9	7898.4	5.5					18	0.2	9356.9	241.5	8810.5	9795	3.3
			25	0.3	20564.3	4108	12673.6	26401.4	4.7					19	0.2	22542	1686.8	18705	24629.1	2.5
			26	0.3	6973.1	1052.4	5127.3	9560.2	4.7					20	0.2	5690	455.1	4737.5	6513.7	2.5
			27	0.3	7471.8	272.5	6812.1	7799.5	4.7					21	0.2	9292.6	160	8984.3	9537.6	2.5
			28	0.3	20468.1	2829	11991.5	24261.7	5.2					22	0.2	24666.2	3498.3	16472.6	29492.9	3.2
			29	0.3	6689.7	850.9	4342.5	8118.1	5.2					23	0.2	5563.6	432.9	4695.6	6545	3.2
			30	0.3	7385.4	290.9	6536	7892.4	5.2					24	0.2	9204.9	263.2	8669	9774.2	3.2
			31	0.3	25770.7	3104.8	19910.6	30435.2	4.1					25	0.2	24120.7	1423	21156.5	26553.5	2.8
			32	0.3	7317.4	867.3	5879.3	8785.8	4.1					26	0.2	5816	369.1	4988	6486.7	2.8
			33	0.3	7474.6	283.4	6777.9	7951.1	4.1					27	0.2	9160.7	204.2	8671	9507.9	2.8
			34	0.2	23734	3398.2	18899	30224.8	2.6					28	0.3	17786	2113	13572.2	21036.5	4.7
			35	0.2	7358.4	480.4	6090.9	8302.6	2.6					29	0.3	5283.9	766.6	4248.4	7566.6	4.7
			36	0.2	7493.5	160.1	7168	7871.6	2.6					30	0.3	8917.9	327.7	8084.5	9426.1	4.7
			37	0.2	15665.6	2508.3	8865	19205.2	3.2					31	0.2	12612.5	1806.7	9675	15443.8	2.7
			38	0.2	6619.6	932.7	4860.5	9019	3.2					32	0.2	4476	220.1	4101.4	4861.3	2.7
			39	0.2	7178.1	275.6	6401.4	7586.6	3.2					33	0.2	8479	133.3	8178.5	8744.1	2.7
	HeLa GFP-TOP3A siCTRL GFP-BLM-PICH-09.czi											HeLa GFP-TOP3A siBLM GFP-BLM-PICH-10.czi
			1	0.1	12896.7	346.5	8446.8	13484.3	1.4					1	0.4	6733	409.8	6025.3	7604.2	5.9
			2	0.1	7055.2	344.1	6501	7599.7	1.4					2	0.4	5275	199.3	4847.3	5823	5.9
			3	0.1	8984.1	257.8	8544	9429	1.4					3	0.4	11914.8	125.9	10809.4	12034.8	5.9
			4	0.3	21617.7	5391.9	12809.3	31115.1	4.3					4	0.2	9444.3	722.1	8306.2	10965	2.3
			5	0.3	8712.9	1485.7	6405	11497.3	4.3					5	0.2	6206.6	390.6	5562.9	7106.6	2.3
			6	0.3	10342.9	526.3	9298.6	11189.5	4.3					6	0.2	11802.5	153.1	11518.4	12065.6	2.3
			7	0.3	31206	8498.4	15195.9	41887.9	5.2					7	0.2	10189	384.4	9465.2	10920	2.3
			8	0.3	9624	2152.3	6282.5	12582.2	5.2					8	0.2	6010.7	373.4	5183	6685.7	2.3
			9	0.3	10733.3	741.1	9406.6	11842.8	5.2					9	0.2	11782.8	158.9	11437.4	12143.3	2.3
			10	0.3	32449	5432.9	19358.1	40889.4	4.3					10	0.5	11400.2	957.5	9539.4	13394.5	7.6
			11	0.3	10409.4	1467	6878.5	12453.8	4.3					11	0.5	6147	638.5	4801.7	7707.1	7.6
			12	0.3	10927.4	657.6	9452.7	12016.5	4.3					12	0.5	11981.2	203.6	11243.3	12261.2	7.6
			13	0.3	24932.8	4038.5	16180.6	30339.3	4.7					13	0.3	13084.8	710.7	11263.5	14164.8	3.9
			14	0.3	9384.1	1159.3	7087	11218.5	4.7					14	0.3	6173.2	422.1	5138.8	6936.5	3.9
			15	0.3	10846.1	662.9	9389	11923.5	4.7					15	0.3	12085.1	164.3	11653	12464	3.9
			16	0.3	24274.5	3202.6	19152.4	28700.4	4.8					16	0.5	13872.7	1256.9	11304.9	16210.7	7.3
			17	0.3	9388.5	1103.2	7839.6	11624.5	4.8					17	0.5	6270.1	541.8	5082.5	7301.1	7.3
			18	0.3	11173.8	749.6	9618.4	12704.8	4.8					18	0.5	12018.8	244.3	11267.9	12413.9	7.3
			19	0.3	29875.8	4802.4	19706.5	35935.5	4.9					19	0.3	12330.7	808.7	10696.1	14037.5	4.8
			20	0.3	10806.7	1557.1	7562.9	12980.4	4.9					20	0.3	6117.2	369.2	5450.9	7097.8	4.8
			21	0.3	11159.9	564.1	9739	11935.3	4.9					21	0.3	11915.6	135.7	11630	12181.6	4.8
			22	0.3	31617.7	4615.9	20849.6	35892.4	4.5					22	0.2	10697.8	1210.4	9150.3	13004.3	3.2
			23	0.3	10982	1398.8	8332.5	13409.3	4.5					23	0.2	6002.8	223	5666.8	6594	3.2
			24	0.3	11358.5	531.8	10231.8	12204.1	4.5					24	0.2	11909.8	177.3	11651.1	12460.5	3.2
			25	0.3	30236	5659.7	16693.7	36843.6	4.3					25	0.2	14400.9	1321.9	11484.5	16309.8	3.1
			26	0.3	10676.9	1598.3	7031.6	13502.3	4.3					26	0.2	6201.3	404.3	5578.3	7009.7	3.1
			27	0.3	11141	602.6	9793.7	12213	4.3					27	0.2	11774	108.4	11538.5	11948.3	3.1
			28	0.3	29033.2	5979.9	16964.3	38759.7	4.7					28	0.4	14291.3	1006.9	11728.3	15936	5.9
			29	0.3	10587.3	2000.3	7340.5	13880.6	4.7					29	0.4	5925.4	486.5	5015	7191.9	5.9
			30	0.3	11076	571.8	9946.8	11943.2	4.7					30	0.4	11669.1	134.1	11401.2	11937.9	5.9
			31	0.2	28637.8	4497.6	21558.1	35033.5	3.1					31	0.2	11038.7	798.7	9718.7	12784	3.3
			32	0.2	11415.9	1662.6	8701	14286.8	3.1					32	0.2	5782.9	276.6	5250.7	6368.9	3.3
			33	0.2	11524.7	518.9	10476.6	12301	3.1					33	0.2	11570.2	113.6	11238	11861.3	3.3
			34	0.3	22360.6	5212.3	14315.8	29799.7	5.3			HeLa GFP-TOP3A siBLM GFP-BLM-PICH-12.czi
			35	0.3	9313.4	1575.7	6785.5	11755.8	5.3					1	0.1	7494.6	205.4	7231.3	7879.5	1.4
			36	0.3	10797.5	647.8	9634.5	12086.1	5.3					2	0.1	5799.1	394.9	5192	6455.8	1.4
			37	0.4	20810.1	5422.4	14750	33047.4	6.7					3	0.1	12441.7	109.7	12266	12631.8	1.4
			38	0.4	9587.6	1879.9	6631.8	13118.8	6.7					4	0.1	9421.7	536.1	7996.2	10334	1.7
			39	0.4	10614.3	660.3	9410.6	11906.2	6.7					5	0.1	4924.5	181	4534.9	5246.9	1.7
			40	0.2	24076.6	5036	15549.5	33395.7	3.4					6	0.1	12364.7	206.1	12013.2	12822.3	1.7
			41	0.2	10601.7	1721	7115.5	13048.9	3.4					7	0.2	12671.1	1614.3	9409.1	15128.9	2.4
			42	0.2	10956.4	503.5	10074.8	11828.1	3.4					8	0.2	5137.4	140	4870.5	5485.7	2.4
	HeLa GFP-TOP3A siCTRL GFP-BLM-PICH-10.czi													9	0.2	12630	213.2	12212.5	13129.2	2.4
			1	0.4	5336.9	414.5	4516.6	6397.3	5.8					10	0.2	12581.1	1136.8	10765	14268.1	2.7
			2	0.4	4259.7	436.9	3499.3	5101.1	5.8					11	0.2	5248.6	621.5	4408	6323.7	2.7
			3	0.4	6141.2	311.4	5514.8	6605.4	5.8					12	0.2	12647.9	540.7	11761.6	13506	2.7
			4	0.3	10380	1805.9	6551	12152	4.4					13	0.2	13099	1611.4	10280.2	15959.8	3.5
			5	0.3	6665.6	697.1	5293.8	7859.3	4.4					14	0.2	5216.4	663.9	4080.1	6274	3.5
			6	0.3	8460.9	640.4	7235	9226.6	4.4					15	0.2	12764.6	429.4	11772.2	13406.6	3.5
			7	0.4	10672.7	1426.2	8009.4	12742.1	5.5					16	0.1	16310.5	1866.4	12284.3	18586.3	2.1
			8	0.4	6596.5	893.6	4571.7	7873.5	5.5					17	0.1	5716.6	753.8	4779	7253	2.1
			9	0.4	8206.1	786.9	6707.3	9226.5	5.5					18	0.1	12917.7	233.8	12441.8	13293.6	2.1
			10	0.3	10821	1222.2	8990.7	14729	4.5					19	0.1	16037.7	2654.3	10700.5	19132.1	2.2
			11	0.3	6988.7	852.1	5397.2	8456	4.5					20	0.1	5062.7	176.1	4725.8	5337.4	2.2
			12	0.3	8522.7	470	7491.5	9281.8	4.5					21	0.1	12718.7	200.4	12252.8	13053.4	2.2
			13	0.2	12210	1638.5	9680.9	14955	2.9					22	0.1	13855.4	1206.5	12136.9	16152	2
			14	0.2	7514	493.1	6566.1	8148.1	2.9					23	0.1	4645.6	124.4	4455	4947.8	2
			15	0.2	8914.1	456.4	7846.2	9601.5	2.9					24	0.1	12321.4	190.8	11992.3	12777	2
			16	0.4	12027.9	823.4	10470.8	13535.5	5.7					25	0.2	12666.4	918	10974.1	13850.8	2.4
			17	0.4	7291	950.8	5059.6	9003.7	5.7					26	0.2	4294.4	245	3689.6	4677.4	2.4
			18	0.4	8545	531.8	7223.3	9181.8	5.7					27	0.2	11739.2	310.5	11209.8	12333.2	2.4
			19	0.1	12605.3	805	10825.5	13905.7	2.2					28	0.1	13892.3	1903.1	9145.7	15711.9	2.2
			20	0.1	7850.7	800.4	6088	9047.1	2.2					29	0.1	4654	273.1	4326.1	5202.1	2.2
			21	0.1	8529.1	234	7968	8960.4	2.2					30	0.1	12002.6	346.9	11342.3	12599.3	2.2
	HeLa GFP-TOP3A siCTRL GFP-BLM-PICH-11.czi													31	0.2	15437.3	1415.1	12400	17396.4	3
			1	0.2	7290.1	644.4	6498.9	8576.7	2.6					32	0.2	4920.2	303.6	4384	5313.5	3
			2	0.2	7433.4	419.5	6784.9	8509.8	2.6					33	0.2	12215.9	184.3	11706.6	12534	3
			3	0.2	11908	403.9	11317.7	12813	2.6					34	0.2	10985.3	2308.7	8598.4	16123.7	3.6
			4	0.4	16808.4	2302.2	12006	20221.9	5.7					35	0.2	4630	404.2	4161.8	5431.9	3.6
			5	0.4	10161.8	1612.1	6025.7	12839.4	5.7					36	0.2	11747.9	327.7	11387.8	12473.6	3.6
			6	0.4	13612.1	919.4	11258.5	14667	5.7			HeLa GFP-TOP3A siBLM GFP-BLM-PICH-13.czi
			7	0.2	16972.7	1236.2	14310.5	19340.5	2.6					1	0.2	4742.9	418.9	3886	8499	3.4
			8	0.2	11081.5	1068.9	8773	12710	2.6					2	0.2	5512.5	279	5047.3	6133.1	3.4
			9	0.2	14262.1	602.6	12643.5	14877.9	2.6					3	0.2	9406.6	91.6	9189.8	9586.6	3.4
			10	0.3	15352.2	1428.2	12141	17552	4.2					4	0.4	13973.6	1484.2	9453	16863.7	5.4
			11	0.3	10916.2	837.4	8440.2	12328.1	4.2					5	0.4	5162.5	710.7	3859	7231.4	5.4
			12	0.3	14491	510.5	13380.4	15414	4.2					6	0.4	9057.4	337.9	8201	9559.8	5.4
			13	0.3	17871.1	2418.6	12845	23569.1	4.3					7	0.2	15887.5	801.2	13820	17679.5	3.4
			14	0.3	10570.7	1119.9	7302.5	11827.1	4.3					8	0.2	5658.7	357.9	4967.8	6496.8	3.4
			15	0.3	13697.2	917.6	11285	14540.4	4.3					9	0.2	9301.8	226.1	8774	9564.2	3.4
			16	0.3	19185.5	3153.2	13396.6	24313.6	4.7					10	0.1	16384.7	963.5	14494	18073.7	1.6
			17	0.3	11200.8	1491.9	7104.5	13521.9	4.7					11	0.1	5211.1	123.7	5009.8	5450.2	1.6
			18	0.3	13803.6	1053.8	11652.9	15170	4.7					12	0.1	9289.7	86.8	9126.4	9445.4	1.6
			19	0.5	18326.5	2621.4	12001	22625.9	7.2					13	0.2	22987.8	1514.9	19249.5	25225.9	2.8
			20	0.5	10698.3	1545	6825.9	12884	7.2					14	0.2	5744.3	340.7	5049.2	6645.5	2.8
			21	0.5	13764.1	836.3	11922.5	15237.5	7.2					15	0.2	9477.5	179.8	8992.2	9698.2	2.8
			22	0.4	23330.8	8423.9	10494	38535.2	6.9					16	0.3	25460.4	4563	16445.4	32360.1	4.1
			23	0.4	10769	3115.3	5905.5	16170.7	6.9					17	0.3	5764.8	598.2	4686	6904.8	4.1
			24	0.4	13144.4	1253.7	10832.2	14896.7	6.9					18	0.3	9514	264.9	8839.8	9954.3	4.1
			25	0.3	23113.9	5200.6	13822.2	29683	4.7					19	0.3	26591.9	3626.7	16192	32033.2	4.2
			26	0.3	11463.4	2317.1	7127.8	15371.5	4.7					20	0.3	5958.2	480.9	4643	6910.5	4.2
			27	0.3	13808	1258.8	11451	15576	4.7					21	0.3	9690.3	162.4	9061.4	9902.5	4.2
			28	0.3	21921.1	4238.8	13020	28208.3	3.8					22	0.3	20436.7	4505.9	11863.2	27343.1	4
			29	0.3	10824.9	1733.3	8176	14300.7	3.8					23	0.3	5242.2	655.4	3774.2	6381.5	4
			30	0.3	13634.1	795.1	12096	14714.4	3.8					24	0.3	9412	452.2	8535.4	10061.6	4
			31	0.2	16943.6	4478.4	10047	23176.2	3.8					25	0.3	24417	3468.6	17275.5	30562.5	4.1
			32	0.2	8947.6	1185.5	5977	10516.8	3.8					26	0.3	5200.3	281	4598.2	5658.9	4.1
			33	0.2	12396.2	1112.2	10353	13962.9	3.8					27	0.3	9456.4	278.7	8844.6	9933.8	4.1
	HeLa GFP-TOP3A siCTRL GFP-BLM-PICH-12.czi													28	0.2	23835.4	3109.7	18010.5	28170.6	3.2
			1	0.1	15384.3	1391.6	7844.8	16727.4	2.2					29	0.2	5229.4	271.4	4768.2	5686.8	3.2
			2	0.1	6837.2	244.2	6308.9	7461.8	2.2					30	0.2	9343.6	245.8	8781.2	9722	3.2
			3	0.1	8402.4	86.8	8253.6	8569.9	2.2					31	0.1	16313.9	1650.7	13363.9	18769.8	1.8
			4	0.2	18913.6	1570.5	16779.6	22658.5	3.8					32	0.1	5241.5	219.3	4929.7	5687.1	1.8
			5	0.2	8174.8	806.6	6452.3	9483.2	3.8					33	0.1	9235.2	117	9070.2	9547	1.8
			6	0.2	9099.4	368.8	8164.2	9571.2	3.8			HeLa GFP-TOP3A siBLM GFP-BLM-PICH-14.czi
			7	0.3	29678.6	5530.6	20933.6	38580.1	4.3					1	0.3	7032.5	500.1	6192.1	7949.6	4
			8	0.3	9855.6	1852.3	6637.4	12680.7	4.3					2	0.3	3958.9	310.2	3422.4	4651	4
			9	0.3	9558.6	644.5	8395.8	10533.1	4.3					3	0.3	7906.3	193	7574.3	8501.4	4
			10	0.3	33059.3	6486.6	18605.5	42155.6	4.4					4	0.2	15438.1	3125.9	11724.4	21823.3	2.6
			11	0.3	10352	1753.6	7642.2	13439	4.4					5	0.2	3451.7	191.8	3198.5	4064.2	2.6
			12	0.3	9597	522.9	8446.4	10293.2	4.4					6	0.2	7367.2	116.4	7154.7	7631	2.6
			13	0.1	35232	3262.7	27954.9	38256	1.5					7	0.2	16848.7	3140.9	10964.5	21875.5	3.1
			14	0.1	11984	656.1	10543.4	12929.3	1.5					8	0.2	3471.6	322.5	2870.5	4081.1	3.1
			15	0.1	10251.8	238	9543.5	10552.3	1.5					9	0.2	7253.1	256.6	6763.1	7629.2	3.1
			16	0.4	23393.9	4481.9	15554.5	30689.9	5.4					10	0.1	18983.2	2098.5	14460.5	22012.8	2.3
			17	0.4	8693.2	1304.9	6399.1	10864.9	5.4					11	0.1	3703.5	320.6	3319.9	4472.5	2.3
			18	0.4	9067.8	435.7	8345.2	9945.8	5.4					12	0.1	7483.4	215	7165	7938.4	2.3
			19	0.3	27065.6	7494.9	13626.4	36214.6	5.2					13	0.1	18995.7	2299	15307	22883.4	2.1
			20	0.3	9788.5	1794.7	6385.2	12738.5	5.2					14	0.1	3742.7	273.8	3381.9	4358.9	2.1
			21	0.3	9445.7	481.6	8596.8	10288.7	5.2					15	0.1	7690.2	196.2	7375	8083	2.1
			22	0.3	24833.7	3706.1	16658.5	30083.6	4.3					16	0.2	16022.1	3439.4	9615.4	20136.9	3.1
			23	0.3	8930.2	831.7	7457.9	10092	4.3					17	0.2	3704.1	461.4	2995.6	4686.7	3.1
			24	0.3	9159.7	235.2	8651.6	9595.1	4.3					18	0.2	7421.9	321	6811.4	7866	3.1
			25	0.3	24988.2	4133.8	17417.1	29805.9	4.3					19	0.3	18434.6	1756.7	14262.6	21431.1	4.1
			26	0.3	9394.6	1240.7	6740	11909	4.3					20	0.3	3701.7	338.2	3192.6	4592.4	4.1
			27	0.3	9099.6	274.6	8522.3	9539.8	4.3					21	0.3	7421.8	261.1	6906.4	7884.8	4.1
			28	0.3	23158.6	3376.2	15294.3	27417.8	4.7					22	0.2	15453.9	1892.5	11536.7	18541.6	3.6
			29	0.3	8305.8	1025.2	6630.7	9990.2	4.7					23	0.2	4026	402.7	2933.2	4732.4	3.6
			30	0.3	8871.4	400.1	8269	9816.4	4.7					24	0.2	7491.8	429.5	6581.8	8128.3	3.6
			31	0.2	23202.6	1650.8	18936.8	26035.7	2.4					25	0.1	14129.8	2157.1	10270	17356.7	1.5
			32	0.2	8711.3	561.1	8036.5	10192.6	2.4					26	0.1	3358.7	109.9	3171.8	3559	1.5
			33	0.2	9192.4	291.3	8542.8	9580.2	2.4					27	0.1	7078	211.5	6755.2	7443.1	1.5
			34	0.2	16245.1	2218.6	14166.5	21507.3	2.5					28	0.1	18145.6	1271.8	15840.1	20010.4	1.4
			35	0.2	7983.1	800.1	6854	9862.9	2.5					29	0.1	3498.3	203.9	3120.2	3808.1	1.4
			36	0.2	8724.3	204.6	8346.5	9198.4	2.5					30	0.1	7130.6	173.5	6821.7	7362.5	1.4
	HeLa GFP-TOP3A siCTRL GFP-BLM-PICH-13.czi													31	0.2	19581.1	2704.4	13067.6	24085.8	3.1
			1	0.1	11567.8	770.9	10441	13061.4	1.6					32	0.2	4044.8	540.1	2975.9	5241.6	3.1
			2	0.1	9324.6	858.1	7884.5	10641	1.6					33	0.2	7436.3	214.1	6829.5	7812.1	3.1
			3	0.1	9764	387.3	9126.2	10603.1	1.6					34	0.1	21663.9	2741.5	15315	25290.6	1.9
			4	0.5	14709.4	1821.2	11424	19142.7	8.1					35	0.1	3891.9	354.8	3089	4458.2	1.9
			5	0.5	10863.5	1190.8	8645.5	12649.4	8.1					36	0.1	7579.9	197	7053	7850.7	1.9
			6	0.5	10495.2	466.8	9112	11151.1	8.1			HeLa GFP-TOP3A siBLM GFP-BLM-PICH-16.czi
			7	0.5	16524.6	1252.5	13718.5	18753.3	8.2					1	0.3	7973.9	467.7	6998.2	8619.4	4.2
			8	0.5	11333.8	975.8	8566.4	13388.9	8.2					2	0.3	4993.3	493.9	3836.7	5869.4	4.2
			9	0.5	10644.5	419.1	9247.2	11438.1	8.2					3	0.3	10682.3	438.9	9744	11350.9	4.2
			10	0.4	17816.9	1230.2	16148.3	21270.5	6.5					4	0.2	14844.3	1076.2	12970.5	17038.5	3.6
			11	0.4	12307.8	755.3	10791.9	13978	6.5					5	0.2	5404.3	261.2	5003	5982.3	3.6
			12	0.4	10996	204.8	10428	11478.9	6.5					6	0.2	11442.3	253.3	10827	11793.5	3.6
	HeLa GFP-TOP3A siCTRL GFP-BLM-PICH-14.czi													7	0.1	15308.1	2312.5	10720.2	18198.8	1.6
			1	0.2	12313.9	944.3	10641	14134.6	3.7					8	0.1	4837.3	461.7	4224.8	5747.1	1.6
			2	0.2	6093.8	301.8	5637.3	6589.4	3.7					9	0.1	10946.6	281.9	10540.2	11452.1	1.6
			3	0.2	8415.9	174	8109.3	8798.6	3.7					10	0.1	15432.7	604.3	14579.9	16388.4	1.6
			4	0.3	23844.7	4361.9	14743	30685.1	4.5					11	0.1	4898.6	321.3	4477.3	5448.3	1.6
			5	0.3	8797.7	953.8	6170.1	10062.6	4.5					12	0.1	11127.3	316	10648.9	11556.5	1.6
			6	0.3	9167.5	295.8	8553.9	9760.9	4.5					13	0.1	15840	1445	12327.5	17893.7	1.4
			7	0.2	29994.9	3229	23776	35008	2.9					14	0.1	5609.4	149.6	5349.4	5828.6	1.4
			8	0.2	10104.3	905.3	8470.6	11459.6	2.9					15	0.1	11516.3	130.6	11289.1	11804.2	1.4
			9	0.2	9476.4	219	8917.8	9813.8	2.9					16	0.2	15894	1240.4	13895.3	18951.9	2.6
			10	0.3	27554.2	3698.9	19004.5	31611.3	4.5					17	0.2	5563.7	428.1	4659.5	6281.7	2.6
			11	0.3	10164.1	997.1	7814.5	11356.9	4.5					18	0.2	11487.7	221	10819	11803.4	2.6
			12	0.3	9346	316.1	8609.2	9868.7	4.5					19	0.1	15702.9	1434.9	13502.5	17585.3	1.3
			13	0.3	28012.2	3397.6	17796.5	33848.7	5.1					20	0.1	5824.1	240.1	5453.9	6172.4	1.3
			14	0.3	10422.4	1536.9	6043	13014.4	5.1					21	0.1	11327.6	231.9	10945	11731.6	1.3
			15	0.3	9776.9	468.9	8722.4	10412.8	5.1			HeLa GFP-TOP3A siBLM GFP-BLM-PICH-17.czi
			16	0.3	26706.2	4080.8	18165.8	34265.3	4.8					1	0.2	5004.6	159.4	4887	5428.8	2.3
			17	0.3	10767.3	1819.4	6225.2	13650.7	4.8					2	0.2	3782.8	395.7	3227	4751.8	2.3
			18	0.3	9628.2	583.8	8151.8	10386.4	4.8					3	0.2	8263.6	90.6	7871.7	8419.7	2.3
			19	0.3	29807.9	3753	21256	36215.8	4.2					4	0.1	11531.6	1266.8	9328	13512.3	2.3
			20	0.3	11328.9	1380.5	8156.6	13245.6	4.2					5	0.1	3786.3	334	3261	4345.3	2.3
			21	0.3	10029.9	398.5	9178.1	10773.1	4.2					6	0.1	8518.1	124.1	8249.5	8784.3	2.3
			22	0.2	27765.8	2955	20984.3	31789.7	3.4					7	0.1	12471	822.1	10599	13372.4	0.8
			23	0.2	10785.6	998.2	7946	12347.6	3.4					8	0.1	3792.2	81.6	3674.2	3942.8	0.8
			24	0.2	9969.9	482.9	8860.5	10634.4	3.4					9	0.1	8418.2	111.2	8154	8605.9	0.8
			25	0.3	27532.6	3334.9	19602.5	31938.2	5.2					10	0.3	13119.7	2852	8841.3	17880.7	4.3
			26	0.3	10681.7	1511.5	7129.5	13289	5.2					11	0.3	3691.2	369.7	3047.9	4389.9	4.3
			27	0.3	9835	538.6	8362	10523.2	5.2					12	0.3	8532.1	266.5	7992.5	8928.4	4.3
			28	0.2	32247.5	5463.6	23829	39811.5	3.3					13	0.4	12067.5	1848.4	9241.4	15373	5.9
			29	0.2	12577.8	1764	8591	15450.1	3.3					14	0.4	3561.5	398.9	2986.4	4492.6	5.9
			30	0.2	10569.3	577.8	9143	11351.2	3.3					15	0.4	8436.4	253.3	8018.2	8952.1	5.9
			31	0.3	27780.9	4349.6	17506.7	32720.5	4					16	0.1	11754	860.4	10142.1	13097.5	2
			32	0.3	10192.8	1875	6111	12672.9	4					17	0.1	3645.9	381.6	3138	4446.6	2
			33	0.3	9499.4	716.5	8019	10434.7	4					18	0.1	8449.5	256.9	8033	8786.5	2
			34	0.2	30500.5	2443.5	24868.9	34004.2	3.2					19	0.2	15929	2459.1	12389.3	20490.1	2.6
			35	0.2	10689	1211.8	8520	12651.2	3.2					20	0.2	4059.5	319.8	3540.6	4590.6	2.6
			36	0.2	9651.4	383	9019.5	10422.7	3.2					21	0.2	8557.4	162.6	8177.9	8886.8	2.6
			37	0.2	27381.3	3941.8	20672.2	33681.4	3.1					22	0.1	17337	3644.6	10268.6	21986.7	2
			38	0.2	9595	1249.1	7505	11381.4	3.1					23	0.1	3493.4	258.8	2976.4	3855	2
			39	0.2	9416.1	387.7	8531.5	10099.7	3.1					24	0.1	8608.1	297.1	8032.8	9042.8	2
	HeLa GFP-TOP3A siCTRL GFP-BLM-PICH-15.czi													25	0.2	16810.2	4341.4	9973.7	22514.7	2.7
			1	0.2	10558.1	393.4	8881.6	10241.4	3.8					26	0.2	3566.8	284.1	3033.7	3961	2.7
			2	0.2	8195	527.5	7063.8	9337	3.8					27	0.2	8568.7	287.2	8065.5	9025.2	2.7
			3	0.2	10395.3	408.8	9899.8	11286.8	3.8					28	0.1	16501	1663	12210.5	18637.1	2
			4	0.2	22717.3	4222.9	15434.5	29781.3	3.4					29	0.1	4401.1	596.7	3456	5245.5	2
			5	0.2	9802.8	1538.8	7746.4	12594.1	3.4					30	0.1	8751.3	172.4	8462.8	9063.5	2
			6	0.2	11060.8	576.5	10008.9	11866	3.4					31	0.1	19248.4	2678.7	13027.7	22320.9	1.4
			7	0.3	30558.8	6051.7	18797.1	39196.2	4.2					32	0.1	4022.7	327.4	3418.6	4533.2	1.4
			8	0.3	12454.3	1980	9066.5	15156	4.2					33	0.1	8780.2	148.2	8495	9045.5	1.4
			9	0.3	12957	839	11025.2	14251.6	4.2					34	0.2	16408	3365.3	11942.5	22034.2	2.7
			10	0.2	35371.4	4466.5	25124.7	41623	3.4					35	0.2	3964.6	290.4	3163.5	4394	2.7
			11	0.2	13541.7	1532.7	10022.1	15942.5	3.4					36	0.2	8731.2	217.1	8134	9118.9	2.7
			12	0.2	13174.4	618.1	11631.7	14180.6	3.4					37	0.3	12249	1868.2	9486	16397.1	4.6
			13	0.2	31533.1	4579.6	22389.8	37665.9	3.4					38	0.3	3480	331.8	3006.7	4292.5	4.6
			14	0.2	12337.6	2184.2	8921.8	15328.1	3.4					39	0.3	8163.8	254.7	7706.7	8701	4.6
			15	0.2	12103.1	549.2	10923	12784.5	3.4			HeLa GFP-TOP3A siBLM GFP-BLM-PICH-18.czi
			16	0.3	24768.8	4728.4	16220.4	31778.3	5.2					1	0.2	4497.3	433.8	4336	5928.6	2.5
			17	0.3	11250.9	1830.8	8014.1	14427.3	5.2					2	0.2	3601.3	359.4	3059.7	4261.5	2.5
			18	0.3	12188.1	588	10767.6	13280	5.2					3	0.2	7973.4	129.1	7708.5	8378	2.5
			19	0.2	28206.5	2979.7	21950.8	31069.7	2.9					4	0.2	10921.4	1834.7	8777.8	15121.8	2.5
			20	0.2	12391.3	1770.7	9626.7	14689.8	2.9					5	0.2	3263	336.5	2693.1	3954.4	2.5
			21	0.2	12677	643.9	11640.5	13855.8	2.9					6	0.2	7823.6	164.9	7567.8	8176.5	2.5
			22	0.1	34180	3215.4	28460.9	39240.3	1.8					7	0.1	13071	1496.7	10466	15549.6	1.4
			23	0.1	14016.4	1663.6	10849.3	16153	1.8					8	0.1	3322.5	250.6	3012.8	3894.2	1.4
			24	0.1	13168.5	598.8	12030.6	14125.5	1.8					9	0.1	7889.3	150.6	7665.2	8164	1.4
			25	0.3	27860	8413.7	13866.1	41288.1	4.9					10	0.1	12758.2	1332.4	10691.7	14548	1.7
			26	0.3	10898.1	2677.5	6702.8	15288.2	4.9					11	0.1	3179.6	329	2661.6	3784.9	1.7
			27	0.3	11773.7	722.9	10409.8	12932.1	4.9					12	0.1	7867.3	112.7	7702.8	8085.9	1.7
			28	0.1	26008.3	1325.8	23321.3	28040	1.2					13	0.3	17545.2	2351.2	12543	21162.8	4.1
			29	0.1	11314.4	412.5	10684.9	12004.9	1.2					14	0.3	3262.2	432.5	2541.5	4009.6	4.1
			30	0.1	12528.3	238	12008.9	12918	1.2					15	0.3	7855.5	243.1	7310	8309.6	4.1
			31	0.1	22585.8	1803	18177.6	24879	1.6					16	0.1	14687.5	678.5	12937	15275.4	1.2
			32	0.1	10638.2	737.5	8978.6	11799.8	1.6					17	0.1	3506.7	313.4	3165.2	4022.1	1.2
			33	0.1	12498	255.1	11958.9	12971	1.6					18	0.1	8021.1	140.3	7803	8242.2	1.2
	HeLa GFP-TOP3A siCTRL GFP-BLM-PICH-16.czi													19	0.2	14162.8	3190.6	9524.4	20461.4	3.1
			1	0.3	5948.1	995.1	4369.8	8030.3	5.1					20	0.2	3058.2	348.2	2642.8	3944.9	3.1
			2	0.3	5534.5	488.9	4674.5	6487.8	5.1					21	0.2	7680.5	162.6	7376.4	8026.3	3.1
			3	0.3	8334.4	364.8	7497.1	8993.6	5.1					22	0.2	13051.7	878.5	10923	14345.9	3
			4	0.2	11971.8	1441.4	10312.7	15030.3	3.1					23	0.2	3249.4	288.3	2847.1	3977.9	3
			5	0.2	7805.4	525.1	6717.4	8982.4	3.1					24	0.2	7862	118.7	7624.4	8124.6	3
			6	0.2	11103.2	354.2	10299.3	11690.2	3.1					25	0.2	16019.1	2343.1	11968.3	20611.9	2.6
			7	0.2	14060.4	1115.9	12178.5	16095.5	2.7					26	0.2	3236	192.8	2892.1	3601.2	2.6
			8	0.2	8017.6	634.6	6770	9390.8	2.7					27	0.2	7909.3	217.8	7443.2	8186.8	2.6
			9	0.2	11283.8	227.1	10636	11575.8	2.7					28	0.1	17018.4	3016.8	12049	20866.4	1.6
			10	0.2	15350.3	1192.8	12937	17709.3	3.3					29	0.1	3523.8	147.1	3261	3817.8	1.6
			11	0.2	7951.6	1236.1	6532.9	10367.2	3.3					30	0.1	8256	131.6	8022.6	8505.3	1.6
			12	0.2	11212.5	563.8	10026.5	12239.8	3.3			HeLa GFP-TOP3A siBLM GFP-BLM-PICH-19.czi
			13	0.4	19882.6	5036	11596.2	29322.3	6.2					1	0.2	6387.1	311.1	5941.6	8124.3	3.5
			14	0.4	9027.7	1645.2	6368.2	11956.5	6.2					2	0.2	4925.5	295.7	4470.4	5577.7	3.5
			15	0.4	11520.5	921.3	9752.9	13316.8	6.2					3	0.2	9304.9	153.1	9003.4	9588.1	3.5
			16	0.4	17596.8	2958.9	12869.1	22974.3	6.2					4	0.2	10476.4	862.7	9044.5	11973.2	2.4
			17	0.4	8817.9	1474.8	6636.8	11560.2	6.2					5	0.2	3986	150.8	3707	4286.8	2.4
			18	0.4	11844.5	901.2	10262.6	13581	6.2					6	0.2	9157.2	151.1	8798.8	9368.9	2.4
			19	0.4	19960.4	5659.8	11872.9	27551.9	5.5					7	0.1	18580.3	1286.7	15074	21408.6	2.2
			20	0.4	8612.7	2290.9	5364.4	12390.1	5.5					8	0.1	4469	279.2	4038.4	4884.7	2.2
			21	0.4	10915.4	1108.3	9522.5	12723.8	5.5					9	0.1	9255.1	93.3	9079.7	9437.6	2.2
			22	0.3	24009.6	4755.9	14613.1	31162.5	4.2					10	0.3	12794	2677.1	8739.6	17907.5	4
			23	0.3	10773	1738.6	6751.8	13244.4	4.2					11	0.3	4132.3	315.8	3598.8	5012.7	4
			24	0.3	12944.4	809.1	10899.4	14093.2	4.2					12	0.3	9432.9	99.6	9170.4	9613.9	4
			25	0.3	19668.1	2076.6	14803.5	22347.7	4.1					13	0.2	12797.6	752.5	11224	14431.8	2.8
			26	0.3	9737.3	1103.6	7284.4	11529.8	4.1					14	0.2	4240	162.4	3907.6	4543.1	2.8
			27	0.3	11753.5	519	10383	12444.9	4.1					15	0.2	9562.8	83.6	9398.7	9745	2.8
			28	0.4	15190.4	2446.5	9708	19724.6	5.7					16	0.1	14157	477.4	13462.6	15068.1	1.3
			29	0.4	8532.1	1450.4	5422.5	10685.3	5.7					17	0.1	4434	145.4	4264.5	4772.7	1.3
			30	0.4	11575.4	643.9	10151.5	12530.3	5.7					18	0.1	9612.7	90.8	9419.7	9822.4	1.3
			31	0.3	20825.5	4626.2	10905.8	27248.1	4.7					19	0.1	14732.7	714.9	12812.5	15438.3	1.2
			32	0.3	9188.2	1247.2	6809.4	11454.4	4.7					20	0.1	4046.2	95.9	3856.2	4238.9	1.2
			33	0.3	11908.6	678.3	10633.2	12987.3	4.7					21	0.1	9466.1	64.1	9370	9591.2	1.2
			34	0.4	17655.4	4308.6	9767.7	25371.4	5.7					22	0.1	15153.5	966.2	12609	16361.1	1.4
			35	0.4	8503.7	1619.6	5671	11592.8	5.7					23	0.1	4538.3	399.1	4095	5399.6	1.4
			36	0.4	11546	859.3	9682.3	13030.6	5.7					24	0.1	9641.7	93.2	9513.2	9826.5	1.4
			37	0.2	22655.5	3353.9	14080.2	26510.1	3.1					25	0.2	15880.5	909.9	13131	17368.1	2.5
			38	0.2	9758.8	1494.6	7360	11659.3	3.1					26	0.2	4726.3	165.9	4316.6	5067.3	2.5
			39	0.2	12154.2	433.4	11147.4	12720.8	3.1					27	0.2	9763.1	214.7	9309	10152.2	2.5
			40	0.3	18315.1	3350.4	12354.3	22477.2	4.8					28	0.1	14789.3	609.2	13871.1	16067.4	2
			41	0.3	8943.7	1435.5	6333.4	11084.3	4.8					29	0.1	4915.8	412.1	4421	5937.2	2
			42	0.3	11846.6	862.5	10249.9	12985.8	4.8					30	0.1	10002.2	113.4	9723.8	10265.5	2
			43	0.2	19830.3	1551.1	16279.2	22950.7	3.4					31	0.2	14006.1	1194.8	11401	15519.1	2.6
			44	0.2	9319.7	697.4	7427.8	10615.5	3.4					32	0.2	4828.2	323.8	4346.3	5372.3	2.6
			45	0.2	11521.6	474.1	10367.5	12266.5	3.4					33	0.2	9882.6	130.5	9600	10145.9	2.6
			46	0.2	21123.8	2805.5	14139	25232.4	3.2					34	0.1	14531.3	1227.4	12990	16678.7	2
			47	0.2	9212.4	874.1	7795	11207.5	3.2					35	0.1	4767.9	329	4359.5	5390.4	2
			48	0.2	11634.7	367.1	10822.3	12198	3.2					36	0.1	9830.9	99.1	9665.9	10046.9	2
	HeLa GFP-TOP3A siCTRL GFP-BLM-PICH-20.czi													37	0.1	14697.6	872.2	12637	16046.7	2
			1	0.1	7997.5	562.9	7175.6	9004.6	2					38	0.1	4493.8	130.4	4168.4	4729.7	2
			2	0.1	6265.7	593.1	5458.7	7251	2					39	0.1	9740.9	117	9494.6	9953.1	2
			3	0.1	8671.8	106.3	8473.5	8835.3	2			HeLa GFP-TOP3A siBLM GFP-BLM-PICH-20.czi
			4	0.3	16026.7	1634.4	13034	18738.6	5.2					1	0.5	6195.9	650.6	5766.9	8573.9	8
			5	0.3	9374.7	805.6	7974.4	11360.6	5.2					2	0.5	4768	488	4036.5	6418.7	8
			6	0.3	11737.4	414.5	10634.5	12239.2	5.2					3	0.5	9901.9	391.7	8619.7	10253.1	8
			7	0.3	17446.5	1125.8	13801.4	20008.6	4.8					4	0.2	18952.2	3614	10752	22945.3	2.3
			8	0.3	9919	688.3	8074.1	11269.2	4.8					5	0.2	4794.2	556	3989	5959.3	2.3
			9	0.3	11901.1	307.3	10871.2	12459.1	4.8					6	0.2	10214	257.5	9624	10662.2	2.3
			10	0.3	23231.2	2927.2	15550.8	27541.3	5					7	0.1	16565.5	2120.4	12076.5	18546.3	2.1
			11	0.3	10101.8	1234.4	7741.3	11716.2	5					8	0.1	4732.8	393	3945.5	5146.3	2.1
			12	0.3	12032.2	414.9	11015.5	12708.6	5					9	0.1	10340.3	139.5	9977	10616.6	2.1
			13	0.3	26663.5	4592.6	18049.7	32919.8	4.2					10	0.2	15455.9	1975.5	12716.1	18942.9	3.1
			14	0.3	10414.7	1413.5	7689.7	12655.4	4.2					11	0.2	4932.8	513.6	4243.1	6231.9	3.1
			15	0.3	11827.2	708.7	10418.9	12877.1	4.2					12	0.2	10204.6	190.9	9862.6	10737.9	3.1
			16	0.4	26113.7	5856.7	16491	35463.5	5.4					13	0.1	19938.3	2016.1	14441.2	22290.9	2.1
			17	0.4	10519.1	1535.9	7900.8	13236.6	5.4					14	0.1	4812.7	467.3	4010.5	5532.9	2.1
			18	0.4	12009.9	663.7	10655.8	13078.2	5.4					15	0.1	10598.4	277.7	10023.8	11021.5	2.1
			19	0.4	23392.8	4285.2	15841.5	31773.5	5.7					16	0.2	16625.5	2897.2	10409.6	20212.1	2.5
			20	0.4	9704.8	1348.1	6782.3	12766.6	5.7					17	0.2	4530.3	422.2	3680.8	4969.9	2.5
			21	0.4	11547.9	763.4	9764.7	12584.7	5.7					18	0.2	10080.4	610.5	9037.3	11010.8	2.5
			22	0.2	23050.6	2872.3	16234	26552.6	2.7					19	0.2	15574.9	1132.7	12608	17341	2.8
			23	0.2	9037.4	521.7	7915.5	10048.6	2.7					20	0.2	5434.3	341.1	4577.5	6111.9	2.8
			24	0.2	11166.6	193.1	10652.8	11451.8	2.7					21	0.2	10656.9	349.3	9868.5	11131.5	2.8
			25	0.2	13755.4	1130.6	11755.8	15580.2	2.6					22	0.2	15945.1	1555.6	13484.4	18861.3	2.3
			26	0.2	7975.6	656	7043.5	9149.3	2.6					23	0.2	5097.7	251.5	4638.6	5370.4	2.3
			27	0.2	10670.8	227.7	10218.9	11141.5	2.6					24	0.2	10715.9	122.7	10415.5	11012.3	2.3
														25	0.2	17791	1572.2	13353	20070.1	3.2
														26	0.2	4925.4	292.2	4471.4	5471.3	3.2
														27	0.2	10558.5	338.1	9737	11019	3.2
														28	0.2	18590.5	2197.5	14773.8	22036	2.9
														29	0.2	4837.4	471.6	3895.8	5586.3	2.9
														30	0.2	10380.3	402.3	9496	10927.2	2.9
												HeLa GFP-TOP3A siBLM GFP-BLM-PICH-21.czi
														1	0.4	5371.4	612.6	6417.7	8709.3	6.7
														2	0.4	5006.8	280.9	4331	5591.8	6.7
														3	0.4	9520.4	216.4	9039.5	9907	6.7
														4	0.3	12242	1065.5	10668.8	14849	4.6
														5	0.3	5304.2	465.9	4573	6838.4	4.6
														6	0.3	9670.3	180.4	9346.1	10124.8	4.6
														7	0.1	11552.2	394.9	10736	12482.5	2.2
														8	0.1	4945.6	215.4	4604.4	5369.8	2.2
														9	0.1	9600.6	271.2	8944	10077.3	2.2
														10	0.2	11753.8	1300.1	8663	13147	3.4
														11	0.2	4561.6	447.9	3971.1	5549.6	3.4
														12	0.2	9361.3	271.1	8761.9	9772.7	3.4
														13	0.1	13411	1586.5	11270.7	15995.3	1.8
														14	0.1	4547.7	210.4	3988.8	4871.3	1.8
														15	0.1	9422	171.2	9144.2	9705.4	1.8
														16	0.1	13478.9	1073	12033	15732.2	1.6
														17	0.1	3890.3	80.5	3748.7	4037.9	1.6
														18	0.1	8904.5	172	8617.1	9196.1	1.6
														19	0.2	17251.9	959.8	14284	18667.2	2.9
														20	0.2	4782.1	365.4	4392.5	5709.4	2.9
														21	0.2	9622.6	274.9	8899	9987.8	2.9
														22	0.2	20305.1	2247.6	16821.5	24776.6	3.1
														23	0.2	5025	551.6	3914	6120.8	3.1
														24	0.2	9733.6	234.8	9019	10223.9	3.1
														25	0.2	20227.7	2540.6	15312.5	25082.7	3.1
														26	0.2	5026.6	535.1	4065	6202.2	3.1
														27	0.2	9734.9	218.9	9261.3	10240.4	3.1
														28	0.1	14628.2	799.9	12482.5	15751.3	2.2
														29	0.1	4915.5	204.9	4494.2	5355	2.2
														30	0.1	9327.1	139.3	9111.1	9639.6	2.2

## Sheet: HeLaGFPTOP3A siBLM Analysis
	HeLa GFP-TOP3A ICRF-193 siCTRL											HeLa GFP-TOP3A ICRF-193 siBLM									siCTRL: Absolute values				siCTRL : Ratio			siBLM: Absolute values				siBLM: Ratio
	HeLa GFP-TOP3A siCTRL GFP-BLM-PICH.czi		Mean		Background correction			Values				HeLa GFP-TOP3A siBLM GFP-BLM-PICH.czi		Mean		Background correction			Values		BLM	PICH	TOP3A		BLM/PICH	TOP3A/PICH		BLM	PICH	TOP3A		BLM/PICH	TOP3A/PICH
	Background	PICH	6168.1		BLM	4792.7	0					Background	PICH	5999.8		BLM	3792.6	0			2373.9	6217.2	1321.9		0.381828	0.21262		0	5725.6	281		0	0.0490778
	Background	BLM	4792.7		BLM	7166.6	2373.9	2373.9				Background	BLM	3792.6		BLM	3558.8	-233.8	0		1808.4	6358.7	1234.7		0.284398	0.194175		0	8835.7	253.1		0	0.0286452
	Background	TOP3A	5738.9		BLM	6601.1	1808.4	1808.4				Background	TOP3A	6158.5		BLM	3574.3	-218.3	0		2339.8	5337.9	1367.3		0.438337	0.256149		0	10918.4	398.8		0	0.0365255
		PICH	12385.3		BLM	7132.5	2339.8	2339.8					PICH	11725.4		BLM	3661	-131.6	0		2846	8811.9	1826.6		0.322972	0.207288		0	6578.4	97		0	0.0147452
		BLM	7166.6		BLM	7638.7	2846	2846					BLM	3558.8		BLM	3243.9	-548.7	0		2921.8	10712.9	1583.1		0.272737	0.147775		0	8049.4	135.5		0	0.0168336
		TOP3A	7060.8		BLM	7714.5	2921.8	2921.8					TOP3A	6439.5		BLM	3414.3	-378.3	0		2510.9	9211.8	1536.5		0.272574	0.166797		5.9	12329.9	204.7		0.000478512	0.0166019
		PICH	12526.8		BLM	7303.6	2510.9	2510.9					PICH	14835.5		BLM	3798.5	5.9	5.9		2840.7	8504.2	1664.5		0.334035	0.195727		0	11649	244		0	0.020946
		BLM	6601.1		BLM	7633.4	2840.7	2840.7					BLM	3574.3		BLM	3144.2	-648.4	0		2619.3	9630.8	1577.8		0.271971	0.163829		0	11672.7	284.8		0	0.0243988
		TOP3A	6973.6		BLM	7412	2619.3	2619.3					TOP3A	6411.6		BLM	3345.8	-446.8	0		2478.9	8653.5	1730.3		0.286462	0.199954		456.1	14272	409.4		0.0319577	0.0286855
		PICH	11506		BLM	7271.6	2478.9	2478.9					PICH	16918.2		BLM	4248.7	456.1	456.1		2306	8699.5	1569.3		0.265073	0.18039		0	11503.5	425.7		0	0.0370061
		BLM	7132.5		BLM	7098.7	2306	2306					BLM	3661		BLM	3768.6	-24	0		2337	9798.5	1283.3		0.238506	0.130969		0	6884.3	115.6		0	0.0167918
		TOP3A	7106.2		BLM	7129.7	2337	2337					TOP3A	6557.3		BLM	3276.9	-515.7	0		1961	7226.8	1268		0.271351	0.175458
		PICH	14980		BLM	6753.7	1961	1961					PICH	12578.2		PICH	5999.8	0										330	2995.3	228.1		0.110173	0.0761526
		BLM	7638.7		PICH	6168.1	0						BLM	3243.9		PICH	11725.4	5725.6	5725.6		2502.9	9349.8	1375.3		0.267696	0.147094		160.2	4768.5	291.6		0.0335955	0.0611513
		TOP3A	7565.5		PICH	12385.3	6217.2	6217.2					TOP3A	6255.5		PICH	14835.5	8835.7	8835.7		2567.6	10883.3	1267.7		0.235921	0.116481		442.9	6371.7	396.3		0.0695105	0.0621969
		PICH	16881		PICH	12526.8	6358.7	6358.7					PICH	14049.2		PICH	16918.2	10918.4	10918.4		3326.6	16016.1	1486.1		0.207703	0.0927879		438.7	7804.9	295.9		0.0562083	0.0379121
		BLM	7714.5		PICH	11506	5337.9	5337.9					BLM	3414.3		PICH	12578.2	6578.4	6578.4		1865.8	9174.6	1184.1		0.203366	0.129063		60.3	5775.6	236.8		0.0104405	0.0410001
		TOP3A	7322		PICH	14980	8811.9	8811.9					TOP3A	6294		PICH	14049.2	8049.4	8049.4		2061.5	9718.9	1240.4		0.212112	0.127628		75.6	7994.1	210.9		0.00945697	0.026382
		PICH	15379.9		PICH	16881	10712.9	10712.9					PICH	18329.7		PICH	18329.7	12329.9	12329.9		2204.3	11583.9	1233.8		0.19029	0.10651		0	4938.5	194.5		0	0.0393844
		BLM	7303.6		PICH	15379.9	9211.8	9211.8					BLM	3798.5		PICH	17648.8	11649	11649		2835.5	16091.3	1353.7		0.176213	0.0841262
		TOP3A	7275.4		PICH	14672.3	8504.2	8504.2					TOP3A	6363.2		PICH	17672.5	11672.7	11672.7		4194.7	18495.5	1882.5		0.226796	0.101782		121.2	4790.9	219		0.025298	0.0457117
		PICH	14672.3		PICH	15798.9	9630.8	9630.8					PICH	17648.8		PICH	20271.8	14272	14272		3516.5	15337.6	1490.8		0.229273	0.097199		594.9	8704.6	463.6		0.0683432	0.0532592
		BLM	7633.4		PICH	14821.6	8653.5	8653.5					BLM	3144.2		PICH	17503.3	11503.5	11503.5		3144.4	14709.1	1409.6		0.213772	0.0958318		201.5	8837.6	179.8		0.0228003	0.0203449
		TOP3A	7403.4		PICH	14867.6	8699.5	8699.5					TOP3A	6402.5		PICH	12884.1	6884.3	6884.3		3120.9	14604	1375		0.213702	0.0941523		139.6	7122.3	170.9		0.0196004	0.0239951
		PICH	15798.9		PICH	15966.6	9798.5	9798.5					PICH	17672.5		TOP3A	6158.5	0			2686.3	13198.2	1080.6		0.203535	0.0818748
		BLM	7412		PICH	13394.9	7226.8	7226.8					BLM	3345.8		TOP3A	6439.5	281	281		2107.2	9344.9	1098.1		0.225492	0.117508		0	5413.4	0		0	0
		TOP3A	7316.7		TOP3A	5738.9	0						TOP3A	6443.3		TOP3A	6411.6	253.1	253.1									0	8920.8	0		0	0
		PICH	14821.6		TOP3A	7060.8	1321.9	1321.9					PICH	20271.8		TOP3A	6557.3	398.8	398.8		2805.4	4023.4	867.2		0.697271	0.215539		0	11736.7	0		0	0
		BLM	7271.6		TOP3A	6973.6	1234.7	1234.7					BLM	4248.7		TOP3A	6255.5	97	97		4404.8	12278	1523.3		0.358755	0.124067		0	8805.9	0		0	0
		TOP3A	7469.2		TOP3A	7106.2	1367.3	1367.3					TOP3A	6567.9		TOP3A	6294	135.5	135.5		4843.2	8712.1	1352.8		0.555916	0.155278		0	12340.2	87.6		0	0.00709875
		PICH	14867.6		TOP3A	7565.5	1826.6	1826.6					PICH	17503.3		TOP3A	6363.2	204.7	204.7		3093	4986.3	1105.1		0.6203	0.221627		0	9130.5	0		0	0
		BLM	7098.7		TOP3A	7322	1583.1	1583.1					BLM	3768.6		TOP3A	6402.5	244	244		3173.2	6515.9	942.9		0.486993	0.144708		0	12647.2	0		0	0
		TOP3A	7308.2		TOP3A	7275.4	1536.5	1536.5					TOP3A	6584.2		TOP3A	6443.3	284.8	284.8		4590	9948.5	1111.6		0.461376	0.111735		0	16013.8	0		0	0
		PICH	15966.6		TOP3A	7403.4	1664.5	1664.5					PICH	12884.1		TOP3A	6567.9	409.4	409.4		3186.9	5922	1100.1		0.538146	0.185765		0	15370	0		0	0
		BLM	7129.7		TOP3A	7316.7	1577.8	1577.8					BLM	3276.9		TOP3A	6584.2	425.7	425.7		2526.4	4851	721.5		0.5208	0.148732		0	9290.2	0		0	0
		TOP3A	7022.2		TOP3A	7469.2	1730.3	1730.3					TOP3A	6274.1		TOP3A	6274.1	115.6	115.6									0	6515.7	0		0	0
		PICH	13394.9		TOP3A	7308.2	1569.3	1569.3				HeLa GFP-TOP3A siBLM GFP-BLM-PICH-02.czi									2455.2	6570.4	925.1		0.373676	0.140798
		BLM	6753.7		TOP3A	7022.2	1283.3	1283.3				Background	PICH	7445.8		BLM	4830.7	0			3204.8	9968.3	1188.1		0.321499	0.119188		0	4444.8	69.1		0	0.0155463
		TOP3A	7006.9		TOP3A	7006.9	1268	1268				Background	BLM	4830.7		BLM	5160.7	330	330		2488.2	7593.6	1293.9		0.327671	0.170393		0	6001.1	160.8		0	0.0267951
	HeLa GFP-TOP3A siCTRL GFP-BLM-PICH-02.czi											Background	TOP3A	6520.3		BLM	4990.9	160.2	160.2		1309.1	2904.4	968.7		0.45073	0.333528		0	6320.4	88.4		0	0.0139865
	Background	PICH	6238.2		BLM	4258.4	0						PICH	10441.1		BLM	5273.6	442.9	442.9		1824.6	5572.9	720.2		0.327406	0.129233		0	9662.3	308.5		0	0.0319282
	Background	BLM	4258.4		BLM	6761.3	2502.9	2502.9					BLM	5160.7		BLM	5269.4	438.7	438.7		2572.8	6596.8	1144.5		0.390007	0.173493		0	10775.9	363.5		0	0.0337327
	Background	TOP3A	6363.2		BLM	6826	2567.6	2567.6					TOP3A	6748.4		BLM	4891	60.3	60.3									122.3	10718.4	497.5		0.0114103	0.0464155
		PICH	15588		BLM	7585	3326.6	3326.6					PICH	12214.3		BLM	4906.3	75.6	75.6		1930.7	8726	498.9		0.221258	0.057174		0	7566.2	223.2		0	0.0294996
		BLM	6761.3		BLM	6124.2	1865.8	1865.8					BLM	4990.9		BLM	4763.5	-67.2	0		1843	8293.8	660.3		0.222214	0.0796137		0	11850.5	159.4		0	0.0134509
		TOP3A	7738.5		BLM	6319.9	2061.5	2061.5					TOP3A	6811.9		PICH	7445.8	0			2080.2	12443	650.1		0.167178	0.0522462		0	12569.5	180.7		0	0.0143761
		PICH	17121.5		BLM	6462.7	2204.3	2204.3					PICH	13817.5		PICH	10441.1	2995.3	2995.3		1868.1	8946.9	716		0.208799	0.0800277		0	15389.3	167.8		0	0.0109037
		BLM	6826		BLM	7093.9	2835.5	2835.5					BLM	5273.6		PICH	12214.3	4768.5	4768.5									43.6	10867.4	174.4		0.004012	0.016048
		TOP3A	7630.9		BLM	8453.1	4194.7	4194.7					TOP3A	6916.6		PICH	13817.5	6371.7	6371.7		5014.4	10915	4677.6		0.459404	0.428548		0	8285.4	0		0	0
		PICH	22254.3		BLM	7774.9	3516.5	3516.5					PICH	15250.7		PICH	15250.7	7804.9	7804.9		4726.8	10574.3	4332.3		0.447008	0.409701		0	11929.9	0		0	0
		BLM	7585		BLM	7402.8	3144.4	3144.4					BLM	5269.4		PICH	13221.4	5775.6	5775.6		5292.1	14196.5	4253.1		0.372775	0.299588
		TOP3A	7849.3		BLM	7379.3	3120.9	3120.9					TOP3A	6816.2		PICH	15439.9	7994.1	7994.1		3719	10972.1	3719.9		0.338951	0.339033		0	6319.3	0		0	0
		PICH	15412.8		BLM	6944.7	2686.3	2686.3					PICH	13221.4		PICH	12384.3	4938.5	4938.5		5303.9	19430.3	4160		0.272971	0.214099		285.4	8144.9	137.2		0.0350403	0.0168449
		BLM	6124.2		BLM	6365.6	2107.2	2107.2					BLM	4891		TOP3A	6520.3	0			5353.5	17325.7	4649.5		0.308992	0.268359		114.2	8975.3	99.9		0.0127238	0.0111305
		TOP3A	7547.3		PICH	6238.2	0						TOP3A	6757.1		TOP3A	6748.4	228.1	228.1		4768.7	12847.4	4052.3		0.37118	0.315418		549.7	11029.8	220.8		0.0498377	0.0200185
		PICH	15957.1		PICH	15588	9349.8	9349.8					PICH	15439.9		TOP3A	6811.9	291.6	291.6		4679.2	12027.2	3876.8		0.389051	0.322336		79.3	14552.4	171.7		0.00544927	0.0117987
		BLM	6319.9		PICH	17121.5	10883.3	10883.3					BLM	4906.3		TOP3A	6916.6	396.3	396.3		2664.1	8457.1	3030.4		0.315013	0.358326		0	10743.1	35.9		0	0.00334168
		TOP3A	7603.6		PICH	22254.3	16016.1	16016.1					TOP3A	6731.2		TOP3A	6816.2	295.9	295.9									266.5	8710.8	438.3		0.0305942	0.0503168
		PICH	17822.1		PICH	15412.8	9174.6	9174.6					PICH	12384.3		TOP3A	6757.1	236.8	236.8		2237.3	7280.1	2168.9		0.307317	0.297922		443.5	11924.1	582.7		0.0371936	0.0488674
		BLM	6462.7		PICH	15957.1	9718.9	9718.9					BLM	4763.5		TOP3A	6731.2	210.9	210.9		3217.7	8375.6	2292		0.384175	0.273652		621.7	18261.4	529.5		0.0340445	0.0289956
		TOP3A	7597		PICH	17822.1	11583.9	11583.9					TOP3A	6714.8		TOP3A	6714.8	194.5	194.5		4750.3	11279.5	2777.3		0.421145	0.246225		343.6	14608.3	365.5		0.0235209	0.02502
		PICH	22329.5		PICH	22329.5	16091.3	16091.3				HeLa GFP-TOP3A siBLM GFP-BLM-PICH-04.czi									5559.6	14862.2	3047.6		0.374077	0.205057		19.6	10274.5	300		0.00190764	0.0291985
		BLM	7093.9		PICH	24733.7	18495.5	18495.5				Background	PICH	5087.3		BLM	3109.8	0			5652.1	12227	3122.2		0.462264	0.255353		121.4	10297.6	125.3		0.0117892	0.0121679
		TOP3A	7716.9		PICH	21575.8	15337.6	15337.6				Background	BLM	3109.8		BLM	3231	121.2	121.2		4766.1	11074.6	2835.7		0.430363	0.256054		297.1	7588.3	175		0.0391524	0.0230618
		PICH	24733.7		PICH	20947.3	14709.1	14709.1				Background	TOP3A	3162		BLM	3704.7	594.9	594.9		4255.6	10002.2	2897.9		0.425466	0.289726
		BLM	8453.1		PICH	20842.2	14604	14604					PICH	9878.2		BLM	3311.3	201.5	201.5		4028.2	11577.1	2631.4		0.347946	0.227294		0	8207.3	15.3		0	0.00186419
		TOP3A	8245.7		PICH	19436.4	13198.2	13198.2					BLM	3231		BLM	3249.4	139.6	139.6		3984.8	12014.2	2835.7		0.331674	0.236029		0	15360.4	464.9		0	0.0302661
		PICH	21575.8		PICH	15583.1	9344.9	9344.9					TOP3A	3381		PICH	5087.3	0			2523.4	7773.8	2237.1		0.324603	0.287774		0	9915.7	424.6		0	0.042821
		BLM	7774.9		TOP3A	6363.2	0						PICH	13791.9		PICH	9878.2	4790.9	4790.9		3028.1	8548.6	2556		0.354222	0.298996		105.1	8102	505		0.0129721	0.0623303
		TOP3A	7854		TOP3A	7738.5	1375.3	1375.3					BLM	3704.7		PICH	13791.9	8704.6	8704.6									205.2	8199.8	533.5		0.025025	0.0650626
		PICH	20947.3		TOP3A	7630.9	1267.7	1267.7					TOP3A	3625.6		PICH	13924.9	8837.6	8837.6		1467.8	10751.4	480.9		0.136522	0.0447291		257.6	7715	704		0.0333895	0.0912508
		BLM	7402.8		TOP3A	7849.3	1486.1	1486.1					PICH	13924.9		PICH	12209.6	7122.3	7122.3		1615.8	9131.2	689.1		0.176954	0.0754665
		TOP3A	7772.8		TOP3A	7547.3	1184.1	1184.1					BLM	3311.3		TOP3A	3162	0			1311.1	8150.6	679.8		0.160859	0.0834049		180	13687.6	298.7		0.0131506	0.0218227
		PICH	20842.2		TOP3A	7603.6	1240.4	1240.4					TOP3A	3341.8		TOP3A	3381	219	219		1464.2	10961.9	703.4		0.133572	0.0641677		755	19605.7	801.2		0.0385092	0.0408657
		BLM	7379.3		TOP3A	7597	1233.8	1233.8					PICH	12209.6		TOP3A	3625.6	463.6	463.6		2041.3	15268.3	839.1		0.133695	0.054957		747.7	15755.3	661.9		0.047457	0.0420113
		TOP3A	7738.2		TOP3A	7716.9	1353.7	1353.7					BLM	3249.4		TOP3A	3341.8	179.8	179.8		2736.6	14036.5	1023		0.194963	0.0728814		953.1	15833.4	810.8		0.0601955	0.0512082
		PICH	19436.4		TOP3A	8245.7	1882.5	1882.5					TOP3A	3332.9		TOP3A	3332.9	170.9	170.9		2216.9	11489.5	993.7		0.19295	0.0864877		1127.5	12771.3	857.8		0.0882839	0.0671662
		BLM	6944.7		TOP3A	7854	1490.8	1490.8				HeLa GFP-TOP3A siBLM GFP-BLM-PICH-05.czi									2377.7	13638.3	1003.2		0.17434	0.0735576		898.5	15019.3	793.5		0.059823	0.052832
		TOP3A	7443.8		TOP3A	7772.8	1409.6	1409.6				Background	PICH	6907.2		BLM	4975.7	0			2094.3	13542.1	916.8		0.154651	0.0677		772.1	17143.5	705.8		0.0450375	0.0411701
		PICH	15583.1		TOP3A	7738.2	1375	1375				Background	BLM	4975.7		BLM	3613.7	-1362	0		2722	18844.7	1006		0.144444	0.0533837		1024.5	16598	661.6		0.0617243	0.0398602
		BLM	6365.6		TOP3A	7443.8	1080.6	1080.6				Background	TOP3A	11398.3		BLM	4291	-684.7	0		2763	16808	1024.9		0.164386	0.0609769		492.4	10263.3	418.8		0.0479768	0.0408056
		TOP3A	7461.3		TOP3A	7461.3	1098.1	1098.1					PICH	12320.6		BLM	4584.2	-391.5	0		2024.2	8739.6	709.5		0.231612	0.0811822		0	5089.8	0		0	0
	HeLa GFP-TOP3A siCTRL GFP-BLM-PICH-03.czi												BLM	3613.7		BLM	4514.8	-460.9	0
	Background	PICH	7741.6		BLM	5792.7	0						TOP3A	10509		BLM	4695	-280.7	0		1657.7	9521	1358.8		0.17411	0.142716		931.6	2711.3	0		0.343599	0
	Background	BLM	5792.7		BLM	8598.1	2805.4	2805.4					PICH	15828		BLM	4564.2	-411.5	0		2568.8	19109.3	1749.2		0.134427	0.0915366		735.7	3456	0		0.212876	0
	Background	TOP3A	3579.3		BLM	10197.5	4404.8	4404.8					BLM	4291		BLM	4371.1	-604.6	0		3354.2	20352.3	1943.3		0.164807	0.0954831		872	4667.2	66.4		0.186836	0.0142269
		PICH	11765		BLM	10635.9	4843.2	4843.2					TOP3A	10859.1		BLM	3870	-1105.7	0		2328.9	12836.1	1862		0.181434	0.14506		898.2	6351.8	170.3		0.141409	0.0268113
		BLM	8598.1		BLM	8885.7	3093	3093					PICH	18643.9		BLM	3835.5	-1140.2	0		2333.3	12177.8	2189.7		0.191603	0.179811		995.1	7139.7	104		0.139376	0.0145664
		TOP3A	4446.5		BLM	8965.9	3173.2	3173.2					BLM	4584.2		BLM	3729.9	-1245.8	0		3751.5	17779.1	2175.8		0.211006	0.12238		842.2	5597.7	0.8		0.150455	0.000142916
		PICH	20019.6		BLM	10382.7	4590	4590					TOP3A	11188		BLM	3993.2	-982.5	0		3926.8	19521	2374.4		0.201158	0.121633		727.8	3964.8	0		0.183565	0
		BLM	10197.5		BLM	8979.6	3186.9	3186.9					PICH	15713.1		PICH	6907.2	0			3621.7	18139.3	2156.9		0.19966	0.118908		926.3	7667.9	0		0.120802	0
		TOP3A	5102.6		BLM	8319.1	2526.4	2526.4					BLM	4514.8		PICH	12320.6	5413.4	5413.4		3532.1	16936.5	2091.9		0.20855	0.123514		650.4	7558.3	0		0.0860511	0
		PICH	16453.7		PICH	7741.6	0						TOP3A	11018.8		PICH	15828	8920.8	8920.8		4360.7	16541.1	2540.6		0.263628	0.153593		507.9	4305.7	0		0.11796	0
		BLM	10635.9		PICH	11765	4023.4	4023.4					PICH	19247.4		PICH	18643.9	11736.7	11736.7		2258.2	10263.9	1813.4		0.220014	0.176677
		TOP3A	4932.1		PICH	20019.6	12278	12278					BLM	4695		PICH	15713.1	8805.9	8805.9		2532.4	8713.4	1630.2		0.290633	0.187091		0	1927.1	0		0	0
		PICH	12727.9		PICH	16453.7	8712.1	8712.1					TOP3A	11485.9		PICH	19247.4	12340.2	12340.2		3546.5	11979.9	1972.3		0.296038	0.164634		0	5176.5	188.3		0	0.0363759
		BLM	8885.7		PICH	12727.9	4986.3	4986.3					PICH	16037.7		PICH	16037.7	9130.5	9130.5									0	5086.5	206.2		0	0.0405387
		TOP3A	4684.4		PICH	14257.5	6515.9	6515.9					BLM	4564.2		PICH	19554.4	12647.2	12647.2		2405.9	5043.1	2319.7		0.477068	0.459975		0	5604.4	322.9		0	0.0576154
		PICH	14257.5		PICH	17690.1	9948.5	9948.5					TOP3A	11319.6		PICH	22921	16013.8	16013.8		2336.8	5335.8	2064.9		0.437947	0.38699		0	8815.9	476		0	0.0539934
		BLM	8965.9		PICH	13663.6	5922	5922					PICH	19554.4		PICH	22277.2	15370	15370		2729	5484.1	2381.5		0.49762	0.434255		0	8543.1	277		0	0.0324238
		TOP3A	4522.2		PICH	12592.6	4851	4851					BLM	4371.1		PICH	16197.4	9290.2	9290.2		3254.3	6873.1	2772.9		0.473484	0.403442		0	6360.8	0		0	0
		PICH	17690.1		TOP3A	3579.3	0						TOP3A	10766.4		PICH	13422.9	6515.7	6515.7		3031.3	6691	2403.8		0.453041	0.359259		0	5171.8	0		0	0
		BLM	10382.7		TOP3A	4446.5	867.2	867.2					PICH	22921		TOP3A	11398.3	0			3591	7268.4	2387.9		0.494056	0.328532		0	6397.7	0		0	0
		TOP3A	4690.9		TOP3A	5102.6	1523.3	1523.3					BLM	3870		TOP3A	10509	-889.3	0									0	7942.7	0		0	0
		PICH	13663.6		TOP3A	4932.1	1352.8	1352.8					TOP3A	10529.4		TOP3A	10859.1	-539.2	0		2728.4	9518.3	1704.1		0.286648	0.179034		0	3490.7	0		0	0
		BLM	8979.6		TOP3A	4684.4	1105.1	1105.1					PICH	22277.2		TOP3A	11188	-210.3	0		3648.1	9682.6	2354.1		0.376769	0.243127
		TOP3A	4679.4		TOP3A	4522.2	942.9	942.9					BLM	3835.5		TOP3A	11018.8	-379.5	0		3482.8	8062.1	2583		0.431997	0.320388		0	1927.1	0		0	0
		PICH	12592.6		TOP3A	4690.9	1111.6	1111.6					TOP3A	10617.1		TOP3A	11485.9	87.6	87.6		3137.3	10581	1789.2		0.296503	0.169096		0	5176.5	188.3		0	0.0363759
		BLM	8319.1		TOP3A	4679.4	1100.1	1100.1					PICH	16197.4		TOP3A	11319.6	-78.7	0		3767.4	11895.4	1895.6		0.316711	0.159356		0	5086.5	206.2		0	0.0405387
		TOP3A	4300.8		TOP3A	4300.8	721.5	721.5					BLM	3729.9		TOP3A	10766.4	-631.9	0		3264.9	11036.4	1856.1		0.29583	0.16818		0	5604.4	322.9		0	0.0576154
	HeLa GFP-TOP3A siCTRL GFP-BLM-PICH-04.czi												TOP3A	10471.1		TOP3A	10529.4	-868.9	0		3335.6	16040.7	1236.4		0.207946	0.0770789		0	8815.9	476		0	0.0539934
	Background	PICH	5034.3		BLM	4103.3	0						PICH	13422.9		TOP3A	10617.1	-781.2	0		4030	15823.8	1900		0.25468	0.120072		0	8543.1	277		0	0.0324238
	Background	BLM	4103.3		BLM	6558.5	2455.2	2455.2					BLM	3993.2		TOP3A	10471.1	-927.2	0		3391.5	14631	1726.1		0.231802	0.117976		0	6360.8	0		0	0
	Background	TOP3A	3335.9		BLM	7308.1	3204.8	3204.8					TOP3A	10851.2		TOP3A	10851.2	-547.1	0		1514.2	9653.5	488.2		0.156855	0.0505723		0	5171.8	0		0	0
		PICH	11604.7		BLM	6591.5	2488.2	2488.2				HeLa GFP-TOP3A siBLM GFP-BLM-PICH-06.czi																0	6397.7	0		0	0
		BLM	6558.5		BLM	5412.4	1309.1	1309.1				Background	PICH	9825.8		BLM	6048.7	0			1337.6	3529.3	697		0.378999	0.19749		0	7942.7	0		0	0
		TOP3A	4261		BLM	5927.9	1824.6	1824.6				Background	BLM	6048.7		BLM	5204.7	-844	0		3018.4	14294.3	1156.2		0.211161	0.0808854		0	3490.7	0		0	0
		PICH	15002.6		BLM	6676.1	2572.8	2572.8				Background	TOP3A	12739.1		BLM	5900	-148.7	0		3514.8	17675	1194.6		0.198857	0.067587
		BLM	7308.1		PICH	5034.3	0						PICH	14270.6		BLM	6047.5	-1.2	0		5146.8	19847.7	1849.4		0.259315	0.0931796		0	9230.7	0		0	0
		TOP3A	4524		PICH	11604.7	6570.4	6570.4					BLM	5204.7		BLM	5877.6	-171.1	0		1856	8009.6	665.4		0.231722	0.0830753		146.2	11144.6	0		0.0131185	0
		PICH	12627.9		PICH	15002.6	9968.3	9968.3					TOP3A	12808.2		BLM	6009.8	-38.9	0		2951.3	11681.3	1043.3		0.252652	0.0893137		0	11641.8	0		0	0
		BLM	6591.5		PICH	12627.9	7593.6	7593.6					PICH	15826.9		BLM	6171	122.3	122.3		2093	9449.4	757.3		0.221496	0.0801427		231.8	18244.9	70.9		0.0127049	0.00388602
		TOP3A	4629.8		PICH	7938.7	2904.4	2904.4					BLM	5900		BLM	5987.7	-61	0		2557.4	9603.9	697.2		0.266288	0.0725955		252.3	20717.5	107.4		0.0121781	0.00518402
		PICH	7938.7		PICH	10607.2	5572.9	5572.9					TOP3A	12899.9		BLM	5404.8	-643.9	0		1468.6	7774.3	469		0.188904	0.060327		445.7	21849	283.7		0.0203991	0.0129846
		BLM	5412.4		PICH	11631.1	6596.8	6596.8					PICH	16146.2		BLM	5673.3	-375.4	0		1874.1	7818.3	790		0.239707	0.101045		0	15693.8	5.4		0	0.000344085
		TOP3A	4304.6		TOP3A	3335.9	0						BLM	6047.5		BLM	5953.8	-94.9	0		445.9	860.8	321.9		0.518007	0.373954		0	19674.1	49.8		0	0.00253125
		PICH	10607.2		TOP3A	4261	925.1	925.1					TOP3A	12827.5		BLM	6092.3	43.6	43.6									0	19092.5	0		0	0
		BLM	5927.9		TOP3A	4524	1188.1	1188.1					PICH	19488.1		BLM	5554.4	-494.3	0		1538.9	3141.6	731.2		0.489846	0.232748		0	11571	0		0	0
		TOP3A	4056.1		TOP3A	4629.8	1293.9	1293.9					BLM	5877.6		BLM	5276.7	-772	0		2009.2	4956.8	880.5		0.405342	0.177635
		PICH	11631.1		TOP3A	4304.6	968.7	968.7					TOP3A	13047.6		PICH	9825.8	0			2983.2	6249.1	1232		0.477381	0.197148		0	8405.6	0		0	0
		BLM	6676.1		TOP3A	4056.1	720.2	720.2					PICH	20601.7		PICH	14270.6	4444.8	4444.8									0	9816.2	0		0	0
		TOP3A	4480.4		TOP3A	4480.4	1144.5	1144.5					BLM	6009.8		PICH	15826.9	6001.1	6001.1		2703.9	11530.8	751.6		0.234494	0.0651819		0	11950.7	0		0	0
	HeLa GFP-TOP3A siCTRL GFP-BLM-PICH-05.czi												TOP3A	13102.6		PICH	16146.2	6320.4	6320.4		4010.5	17681	1060.5		0.226825	0.0599796		0	11963.2	0		0	0
	Background	PICH	8452.1		BLM	5813.2	0						PICH	20544.2		PICH	19488.1	9662.3	9662.3		4070.3	15240.3	930.1		0.267075	0.061029		0	8989.6	0		0	0
	Background	BLM	5813.2		BLM	7743.9	1930.7	1930.7					BLM	6171		PICH	20601.7	10775.9	10775.9		4328.6	15698.3	1361		0.275737	0.0866973		0	11402.1	0		0	0
	Background	TOP3A	3648.4		BLM	7656.2	1843	1843					TOP3A	13236.6		PICH	20544.2	10718.4	10718.4		4673.5	14392.3	1212.3		0.324722	0.0842325		67.1	8421.4	0		0.0079678	0
		PICH	17178.1		BLM	7893.4	2080.2	2080.2					PICH	17392		PICH	17392	7566.2	7566.2		5235.1	17494	1614		0.299251	0.0922602		0	7097.3	0		0	0
		BLM	7743.9		BLM	7681.3	1868.1	1868.1					BLM	5987.7		PICH	21676.3	11850.5	11850.5		4691.8	15451.9	1554		0.303639	0.10057		0	11113.1	0		0	0
		TOP3A	4147.3		PICH	8452.1	0						TOP3A	12962.3		PICH	22395.3	12569.5	12569.5		4587.9	15218.7	1419.1		0.301465	0.0932471		85.9	12548.6	0		0.00684539	0
		PICH	16745.9		PICH	17178.1	8726	8726					PICH	21676.3		PICH	25215.1	15389.3	15389.3		6484	19933.6	2153.4		0.32528	0.108029		0	14631.4	0		0	0
		BLM	7656.2		PICH	16745.9	8293.8	8293.8					BLM	5404.8		PICH	20693.2	10867.4	10867.4		4099	15467	1083.5		0.265016	0.0700524
		TOP3A	4308.7		PICH	20895.1	12443	12443					TOP3A	12898.5		PICH	18111.2	8285.4	8285.4		4595.2	18186.6	1235.5		0.25267	0.0679346		411	6870.4	760		0.0598218	0.110619
		PICH	20895.1		PICH	17399	8946.9	8946.9					PICH	22395.3		PICH	21755.7	11929.9	11929.9		3501.2	15067.4	1000.2		0.232369	0.0663817		0	7334.2	264.3		0	0.0360367
		BLM	7893.4		TOP3A	3648.4	0						BLM	5673.3		TOP3A	12739.1	0										0	7458.8	445		0	0.0596611
		TOP3A	4298.5		TOP3A	4147.3	498.9	498.9					TOP3A	12919.8		TOP3A	12808.2	69.1	69.1		1607.8	12159.2	665.5		0.132229	0.0547322		616.1	7866.1	834		0.0783234	0.106025
		PICH	17399		TOP3A	4308.7	660.3	660.3					PICH	25215.1		TOP3A	12899.9	160.8	160.8		4259.3	20000.7	2561.7		0.212958	0.128081		570.4	7920.1	805.4		0.0720193	0.101691
		BLM	7681.3		TOP3A	4298.5	650.1	650.1					BLM	5953.8		TOP3A	12827.5	88.4	88.4		5346.7	24813.3	2779.1		0.215477	0.112		830.8	7729	645.3		0.107491	0.0834907
		TOP3A	4364.4		TOP3A	4364.4	716	716					TOP3A	12906.9		TOP3A	13047.6	308.5	308.5		4142.6	20975	1707.8		0.197502	0.0814207
	HeLa GFP-TOP3A siCTRL GFP-BLM-PICH-06.czi												PICH	20693.2		TOP3A	13102.6	363.5	363.5		3055.9	14210.7	1792.8		0.215042	0.126158		3.5	6527	254.5		0.000536234	0.0389919
	Background	PICH	6412.1		BLM	6007	0						BLM	6092.3		TOP3A	13236.6	497.5	497.5		4196.3	17648.4	2281.7		0.237772	0.129287		9.4	7466.4	154.6		0.00125897	0.0207061
	Background	BLM	6007		BLM	11021.4	5014.4	5014.4					TOP3A	12913.5		TOP3A	12962.3	223.2	223.2		5821.4	23621.9	2773.2		0.246441	0.1174		0	8115.1	268.5		0	0.0330865
	Background	TOP3A	11644.9		BLM	10733.8	4726.8	4726.8					PICH	18111.2		TOP3A	12898.5	159.4	159.4		2703.1	17301.9	1378.4		0.156231	0.0796676		0	7062.9	172.8		0	0.0244659
		PICH	17327.1		BLM	11299.1	5292.1	5292.1					BLM	5554.4		TOP3A	12919.8	180.7	180.7		3119.4	15450.2	2133		0.2019	0.138056		0	6749.4	185.9		0	0.0275432
		BLM	11021.4		BLM	9726	3719	3719					TOP3A	12524.2		TOP3A	12906.9	167.8	167.8		2443.2	12027.7	2102.7		0.203131	0.174821		276.7	10924.4	293.8		0.0253286	0.0268939
		TOP3A	16322.5		BLM	11310.9	5303.9	5303.9					PICH	21755.7		TOP3A	12913.5	174.4	174.4									0	12332.4	344.5		0	0.0279345
		PICH	16986.4		BLM	11360.5	5353.5	5353.5					BLM	5276.7		TOP3A	12524.2	-214.9	0		2270.9	6023.7	2768.8		0.376994	0.459651		0	11805.6	305.1		0	0.0258437
		BLM	10733.8		BLM	10775.7	4768.7	4768.7					TOP3A	12544.5		TOP3A	12544.5	-194.6	0		2483.1	8112.3	2949.4		0.306091	0.363571		618.3	11496.4	487.7		0.0537821	0.042422
		TOP3A	15977.2		BLM	10686.2	4679.2	4679.2				HeLa GFP-TOP3A siBLM GFP-BLM-PICH-07.czi									2417.1	9402.2	2878.1		0.257078	0.306109		239.9	14243.8	516.6		0.0168424	0.0362684
		PICH	20608.6		BLM	8671.1	2664.1	2664.1				Background	PICH	7626.4		BLM	4367.6	0			3493.2	13934.5	3186.1		0.250687	0.228648		181.8	11403.4	467.6		0.0159426	0.0410053
		BLM	11299.1		PICH	6412.1	0					Background	BLM	4367.6		BLM	3989.2	-378.4	0		3283.4	11648.7	3510.1		0.281868	0.30133		0	7244.4	0		0	0
		TOP3A	15898		PICH	17327.1	10915	10915				Background	TOP3A	12605.6		BLM	4653	285.4	285.4		3078.2	14012.3	2581		0.219678	0.184195
		PICH	17384.2		PICH	16986.4	10574.3	10574.3					PICH	13945.7		BLM	4481.8	114.2	114.2		5238.5	18061.5	4610		0.290037	0.255239		0	6424.1	0		0	0
		BLM	9726		PICH	20608.6	14196.5	14196.5					BLM	3989.2		BLM	4917.3	549.7	549.7		4202.8	13720	3419.1		0.306327	0.249206		0	8573.7	0		0	0
		TOP3A	15364.8		PICH	17384.2	10972.1	10972.1					TOP3A	12486.2		BLM	4446.9	79.3	79.3		2997.6	9242.3	3241		0.324335	0.35067		0	8260.9	0		0	0
		PICH	25842.4		PICH	25842.4	19430.3	19430.3					PICH	15771.3		BLM	4277	-90.6	0		3653.7	14877.4	3574.2		0.245587	0.240244		0	13047.9	0		0	0
		BLM	11310.9		PICH	23737.8	17325.7	17325.7					BLM	4653		BLM	4634.1	266.5	266.5		2969.2	11707.3	3211.6		0.25362	0.274325		0	10190.2	47.7		0	0.00468097
		TOP3A	15804.9		PICH	19259.5	12847.4	12847.4					TOP3A	12742.8		BLM	4811.1	443.5	443.5		4224.3	16707.4	3819.8		0.25284	0.228629		0	9665.5	0		0	0
		PICH	23737.8		PICH	18439.3	12027.2	12027.2					PICH	16601.7		BLM	4989.3	621.7	621.7		3409.2	12367	3512.2		0.275669	0.283998		0	8554.4	0		0	0
		BLM	11360.5		PICH	14869.2	8457.1	8457.1					BLM	4481.8		BLM	4711.2	343.6	343.6		3785.2	13882.2	3187.2		0.272666	0.229589		0	11521.8	0		0	0
		TOP3A	16294.4		TOP3A	11644.9	0						TOP3A	12705.5		BLM	4387.2	19.6	19.6		3677.9	15175.7	3300.3		0.242355	0.217473		0	12521.1	282.6		0	0.0225699
		PICH	19259.5		TOP3A	16322.5	4677.6	4677.6					PICH	18656.2		BLM	4489	121.4	121.4
		BLM	10775.7		TOP3A	15977.2	4332.3	4332.3					BLM	4917.3		BLM	4664.7	297.1	297.1		3109	8029.2	3065.6		0.387212	0.381806		0	4089.3	0		0	0
		TOP3A	15697.2		TOP3A	15898	4253.1	4253.1					TOP3A	12826.4		PICH	7626.4	0			3653.3	9449	3229.3		0.386634	0.341761		0	12193.2	0		0	0
		PICH	18439.3		TOP3A	15364.8	3719.9	3719.9					PICH	22178.8		PICH	13945.7	6319.3	6319.3		3836.1	15233.7	3360.4		0.251817	0.22059		0	6406.9	128		0	0.0199785
		BLM	10686.2		TOP3A	15804.9	4160	4160					BLM	4446.9		PICH	15771.3	8144.9	8144.9		4149	18666	3155.4		0.222276	0.169045		0	6410.5	257.9		0	0.0402309
		TOP3A	15521.7		TOP3A	16294.4	4649.5	4649.5					TOP3A	12777.3		PICH	16601.7	8975.3	8975.3		4253.4	18116.2	3338.1		0.234784	0.18426		0	7769.9	307.8		0	0.0396144
		PICH	14869.2		TOP3A	15697.2	4052.3	4052.3					PICH	18369.5		PICH	18656.2	11029.8	11029.8		3439.1	15395.3	2876.1		0.223386	0.186817		0	8345.6	161.2		0	0.0193156
		BLM	8671.1		TOP3A	15521.7	3876.8	3876.8					BLM	4277		PICH	22178.8	14552.4	14552.4		2771.7	15053.1	2494.8		0.184128	0.165733		0	8766.4	336.8		0	0.0384194
		TOP3A	14675.3		TOP3A	14675.3	3030.4	3030.4					TOP3A	12641.5		PICH	18369.5	10743.1	10743.1		1709.9	5757.9	1999		0.296966	0.347175		0	9493.4	458.2		0	0.0482651
	HeLa GFP-TOP3A siCTRL GFP-BLM-PICH-07.czi												PICH	16337.2		PICH	16337.2	8710.8	8710.8									0	8402.2	697.3		0	0.0829902
	Background	PICH	7191.3		BLM	6507.4	0						BLM	4634.1		PICH	19550.5	11924.1	11924.1									0	7619	577.7		0	0.0758236
	Background	BLM	6507.4		BLM	8744.7	2237.3	2237.3					TOP3A	13043.9		PICH	25887.8	18261.4	18261.4									0	8144.2	526		0	0.0645858
	Background	TOP3A	9775.6		BLM	9725.1	3217.7	3217.7					PICH	19550.5		PICH	22234.7	14608.3	14608.3									0	8310.5	436		0	0.0524638
		PICH	14471.4		BLM	11257.7	4750.3	4750.3					BLM	4811.1		PICH	17900.9	10274.5	10274.5
		BLM	8744.7		BLM	12067	5559.6	5559.6					TOP3A	13188.3		PICH	17924	10297.6	10297.6									26.2	12756.3	312.1		0.00205389	0.0244663
		TOP3A	11944.5		BLM	12159.5	5652.1	5652.1					PICH	25887.8		PICH	15214.7	7588.3	7588.3									0	10369.6	438.4		0	0.0422774
		PICH	15566.9		BLM	11273.5	4766.1	4766.1					BLM	4989.3		TOP3A	12605.6	0										164.8	9260	302.7		0.017797	0.032689
		BLM	9725.1		BLM	10763	4255.6	4255.6					TOP3A	13135.1		TOP3A	12486.2	-119.4	0									44.7	13742.4	696.5		0.00325271	0.0506826
		TOP3A	12067.6		BLM	10535.6	4028.2	4028.2					PICH	22234.7		TOP3A	12742.8	137.2	137.2									0	10429.6	178.5		0	0.0171148
		PICH	18470.8		BLM	10492.2	3984.8	3984.8					BLM	4711.2		TOP3A	12705.5	99.9	99.9									666.3	9379	755		0.0710417	0.080499
		BLM	11257.7		BLM	9030.8	2523.4	2523.4					TOP3A	12971.1		TOP3A	12826.4	220.8	220.8									329.7	9749.2	814		0.0338182	0.083494
		TOP3A	12552.9		BLM	9535.5	3028.1	3028.1					PICH	17900.9		TOP3A	12777.3	171.7	171.7									157.4	11595.1	656.6		0.0135747	0.0566274
		PICH	22053.5		PICH	7191.3	0						BLM	4387.2		TOP3A	12641.5	35.9	35.9									69.4	12394.6	478.4		0.00559921	0.0385975
		BLM	12067		PICH	14471.4	7280.1	7280.1					TOP3A	12905.6		TOP3A	13043.9	438.3	438.3
		TOP3A	12823.2		PICH	15566.9	8375.6	8375.6					PICH	17924		TOP3A	13188.3	582.7	582.7									297.4	6870.6	149.9		0.0432859	0.0218176
		PICH	19418.3		PICH	18470.8	11279.5	11279.5					BLM	4489		TOP3A	13135.1	529.5	529.5									0	6180.8	80.2		0	0.0129757
		BLM	12159.5		PICH	22053.5	14862.2	14862.2					TOP3A	12730.9		TOP3A	12971.1	365.5	365.5									0	6382.4	0		0	0
		TOP3A	12897.8		PICH	19418.3	12227	12227					PICH	15214.7		TOP3A	12905.6	300	300									0	8039.6	0		0	0
		PICH	18265.9		PICH	18265.9	11074.6	11074.6					BLM	4664.7		TOP3A	12730.9	125.3	125.3									0	8107.5	0		0	0
		BLM	11273.5		PICH	17193.5	10002.2	10002.2					TOP3A	12780.6		TOP3A	12780.6	175	175									0	11880.5	102.2		0	0.00860233
		TOP3A	12611.3		PICH	18768.4	11577.1	11577.1				HeLa GFP-TOP3A siBLM GFP-BLM-PICH-08.czi																18.2	14933.7	213.2		0.00121872	0.0142764
		PICH	17193.5		PICH	19205.5	12014.2	12014.2				Background	PICH	7331.3		BLM	4716.3	0										19.8	14856.3	214.5		0.00133277	0.0144383
		BLM	10763		PICH	14965.1	7773.8	7773.8				Background	BLM	4716.3		BLM	4327	-389.3	0									0	9256.8	0		0	0
		TOP3A	12673.5		PICH	15739.9	8548.6	8548.6				Background	TOP3A	10187.3		BLM	4605.1	-111.2	0
		PICH	18768.4		TOP3A	9775.6	0						PICH	15538.6		BLM	4603.3	-113	0
		BLM	10535.6		TOP3A	11944.5	2168.9	2168.9					BLM	4327		BLM	4821.4	105.1	105.1
		TOP3A	12407		TOP3A	12067.6	2292	2292					TOP3A	10202.6		BLM	4921.5	205.2	205.2
		PICH	19205.5		TOP3A	12552.9	2777.3	2777.3					PICH	22691.7		BLM	4973.9	257.6	257.6
		BLM	10492.2		TOP3A	12823.2	3047.6	3047.6					BLM	4605.1		PICH	7331.3	0
		TOP3A	12611.3		TOP3A	12897.8	3122.2	3122.2					TOP3A	10652.2		PICH	15538.6	8207.3	8207.3
		PICH	14965.1		TOP3A	12611.3	2835.7	2835.7					PICH	17247		PICH	22691.7	15360.4	15360.4
		BLM	9030.8		TOP3A	12673.5	2897.9	2897.9					BLM	4603.3		PICH	17247	9915.7	9915.7
		TOP3A	12012.7		TOP3A	12407	2631.4	2631.4					TOP3A	10611.9		PICH	15433.3	8102	8102
		PICH	15739.9		TOP3A	12611.3	2835.7	2835.7					PICH	15433.3		PICH	15531.1	8199.8	8199.8
		BLM	9535.5		TOP3A	12012.7	2237.1	2237.1					BLM	4821.4		PICH	15046.3	7715	7715
		TOP3A	12331.6		TOP3A	12331.6	2556	2556					TOP3A	10692.3		TOP3A	10187.3	0
	HeLa GFP-TOP3A siCTRL GFP-BLM-PICH-08.czi												PICH	15531.1		TOP3A	10202.6	15.3	15.3
	Background	PICH	6926		BLM	4595.4	0						BLM	4921.5		TOP3A	10652.2	464.9	464.9
	Background	BLM	4595.4		BLM	6063.2	1467.8	1467.8					TOP3A	10720.8		TOP3A	10611.9	424.6	424.6
	Background	TOP3A	6468.6		BLM	6211.2	1615.8	1615.8					PICH	15046.3		TOP3A	10692.3	505	505
		PICH	17677.4		BLM	5906.5	1311.1	1311.1					BLM	4973.9		TOP3A	10720.8	533.5	533.5
		BLM	6063.2		BLM	6059.6	1464.2	1464.2					TOP3A	10891.3		TOP3A	10891.3	704	704
		TOP3A	6949.5		BLM	6636.7	2041.3	2041.3				HeLa GFP-TOP3A siBLM GFP-BLM-PICH-09.czi
		PICH	16057.2		BLM	7332	2736.6	2736.6				Background	PICH	7522.7		BLM	4791.5	0
		BLM	6211.2		BLM	6812.3	2216.9	2216.9				Background	BLM	4791.5		BLM	4971.5	180	180
		TOP3A	7157.7		BLM	6973.1	2377.7	2377.7				Background	TOP3A	8499.1		BLM	5546.5	755	755
		PICH	15076.6		BLM	6689.7	2094.3	2094.3					PICH	21210.3		BLM	5539.2	747.7	747.7
		BLM	5906.5		BLM	7317.4	2722	2722					BLM	4971.5		BLM	5744.6	953.1	953.1
		TOP3A	7148.4		BLM	7358.4	2763	2763					TOP3A	8797.8		BLM	5919	1127.5	1127.5
		PICH	17887.9		BLM	6619.6	2024.2	2024.2					PICH	27128.4		BLM	5690	898.5	898.5
		BLM	6059.6		PICH	6926	0						BLM	5546.5		BLM	5563.6	772.1	772.1
		TOP3A	7172		PICH	17677.4	10751.4	10751.4					TOP3A	9300.3		BLM	5816	1024.5	1024.5
		PICH	22194.3		PICH	16057.2	9131.2	9131.2					PICH	23278		BLM	5283.9	492.4	492.4
		BLM	6636.7		PICH	15076.6	8150.6	8150.6					BLM	5539.2		BLM	4476	-315.5	0
		TOP3A	7307.7		PICH	17887.9	10961.9	10961.9					TOP3A	9161		PICH	7522.7	0
		PICH	20962.5		PICH	22194.3	15268.3	15268.3					PICH	23356.1		PICH	21210.3	13687.6	13687.6
		BLM	7332		PICH	20962.5	14036.5	14036.5					BLM	5744.6		PICH	27128.4	19605.7	19605.7
		TOP3A	7491.6		PICH	18415.5	11489.5	11489.5					TOP3A	9309.9		PICH	23278	15755.3	15755.3
		PICH	18415.5		PICH	20564.3	13638.3	13638.3					PICH	20294		PICH	23356.1	15833.4	15833.4
		BLM	6812.3		PICH	20468.1	13542.1	13542.1					BLM	5919		PICH	20294	12771.3	12771.3
		TOP3A	7462.3		PICH	25770.7	18844.7	18844.7					TOP3A	9356.9		PICH	22542	15019.3	15019.3
		PICH	20564.3		PICH	23734	16808	16808					PICH	22542		PICH	24666.2	17143.5	17143.5
		BLM	6973.1		PICH	15665.6	8739.6	8739.6					BLM	5690		PICH	24120.7	16598	16598
		TOP3A	7471.8		TOP3A	6468.6	0						TOP3A	9292.6		PICH	17786	10263.3	10263.3
		PICH	20468.1		TOP3A	6949.5	480.9	480.9					PICH	24666.2		PICH	12612.5	5089.8	5089.8
		BLM	6689.7		TOP3A	7157.7	689.1	689.1					BLM	5563.6		TOP3A	8499.1	0
		TOP3A	7385.4		TOP3A	7148.4	679.8	679.8					TOP3A	9204.9		TOP3A	8797.8	298.7	298.7
		PICH	25770.7		TOP3A	7172	703.4	703.4					PICH	24120.7		TOP3A	9300.3	801.2	801.2
		BLM	7317.4		TOP3A	7307.7	839.1	839.1					BLM	5816		TOP3A	9161	661.9	661.9
		TOP3A	7474.6		TOP3A	7491.6	1023	1023					TOP3A	9160.7		TOP3A	9309.9	810.8	810.8
		PICH	23734		TOP3A	7462.3	993.7	993.7					PICH	17786		TOP3A	9356.9	857.8	857.8
		BLM	7358.4		TOP3A	7471.8	1003.2	1003.2					BLM	5283.9		TOP3A	9292.6	793.5	793.5
		TOP3A	7493.5		TOP3A	7385.4	916.8	916.8					TOP3A	8917.9		TOP3A	9204.9	705.8	705.8
		PICH	15665.6		TOP3A	7474.6	1006	1006					PICH	12612.5		TOP3A	9160.7	661.6	661.6
		BLM	6619.6		TOP3A	7493.5	1024.9	1024.9					BLM	4476		TOP3A	8917.9	418.8	418.8
		TOP3A	7178.1		TOP3A	7178.1	709.5	709.5					TOP3A	8479		TOP3A	8479	-20.1	0
	HeLa GFP-TOP3A siCTRL GFP-BLM-PICH-09.czi											HeLa GFP-TOP3A siBLM GFP-BLM-PICH-10.czi
	Background	PICH	12896.7		BLM	7055.2	0					Background	PICH	6733		BLM	5275	0
	Background	BLM	7055.2		BLM	8712.9	1657.7	1657.7				Background	BLM	5275		BLM	6206.6	931.6	931.6
	Background	TOP3A	8984.1		BLM	9624	2568.8	2568.8				Background	TOP3A	11914.8		BLM	6010.7	735.7	735.7
		PICH	21617.7		BLM	10409.4	3354.2	3354.2					PICH	9444.3		BLM	6147	872	872
		BLM	8712.9		BLM	9384.1	2328.9	2328.9					BLM	6206.6		BLM	6173.2	898.2	898.2
		TOP3A	10342.9		BLM	9388.5	2333.3	2333.3					TOP3A	11802.5		BLM	6270.1	995.1	995.1
		PICH	31206		BLM	10806.7	3751.5	3751.5					PICH	10189		BLM	6117.2	842.2	842.2
		BLM	9624		BLM	10982	3926.8	3926.8					BLM	6010.7		BLM	6002.8	727.8	727.8
		TOP3A	10733.3		BLM	10676.9	3621.7	3621.7					TOP3A	11782.8		BLM	6201.3	926.3	926.3
		PICH	32449		BLM	10587.3	3532.1	3532.1					PICH	11400.2		BLM	5925.4	650.4	650.4
		BLM	10409.4		BLM	11415.9	4360.7	4360.7					BLM	6147		BLM	5782.9	507.9	507.9
		TOP3A	10927.4		BLM	9313.4	2258.2	2258.2					TOP3A	11981.2		PICH	6733	0
		PICH	24932.8		BLM	9587.6	2532.4	2532.4					PICH	13084.8		PICH	9444.3	2711.3	2711.3
		BLM	9384.1		BLM	10601.7	3546.5	3546.5					BLM	6173.2		PICH	10189	3456	3456
		TOP3A	10846.1		PICH	12096.7	0						TOP3A	12085.1		PICH	11400.2	4667.2	4667.2
		PICH	24274.5		PICH	21617.7	9521	9521					PICH	13872.7		PICH	13084.8	6351.8	6351.8
		BLM	9388.5		PICH	31206	19109.3	19109.3					BLM	6270.1		PICH	13872.7	7139.7	7139.7
		TOP3A	11173.8		PICH	32449	20352.3	20352.3					TOP3A	12018.8		PICH	12330.7	5597.7	5597.7
		PICH	29875.8		PICH	24932.8	12836.1	12836.1					PICH	12330.7		PICH	10697.8	3964.8	3964.8
		BLM	10806.7		PICH	24274.5	12177.8	12177.8					BLM	6117.2		PICH	14400.9	7667.9	7667.9
		TOP3A	11159.9		PICH	29875.8	17779.1	17779.1					TOP3A	11915.6		PICH	14291.3	7558.3	7558.3
		PICH	31617.7		PICH	31617.7	19521	19521					PICH	10697.8		PICH	11038.7	4305.7	4305.7
		BLM	10982		PICH	30236	18139.3	18139.3					BLM	6002.8		TOP3A	11914.8	0
		TOP3A	11358.5		PICH	29033.2	16936.5	16936.5					TOP3A	11909.8		TOP3A	11802.5	-112.3	0
		PICH	30236		PICH	28637.8	16541.1	16541.1					PICH	14400.9		TOP3A	11782.8	-132	0
		BLM	10676.9		PICH	22360.6	10263.9	10263.9					BLM	6201.3		TOP3A	11981.2	66.4	66.4
		TOP3A	11141		PICH	20810.1	8713.4	8713.4					TOP3A	11774		TOP3A	12085.1	170.3	170.3
		PICH	29033.2		PICH	24076.6	11979.9	11979.9					PICH	14291.3		TOP3A	12018.8	104	104
		BLM	10587.3		TOP3A	8984.1	0						BLM	5925.4		TOP3A	11915.6	0.8	0.8
		TOP3A	11076		TOP3A	10342.9	1358.8	1358.8					TOP3A	11669.1		TOP3A	11909.8	-5	0
		PICH	28637.8		TOP3A	10733.3	1749.2	1749.2					PICH	11038.7		TOP3A	11774	-140.8	0
		BLM	11415.9		TOP3A	10927.4	1943.3	1943.3					BLM	5782.9		TOP3A	11669.1	-245.7	0
		TOP3A	11524.7		TOP3A	10846.1	1862	1862					TOP3A	11570.2		TOP3A	11570.2	-344.6	0
		PICH	22360.6		TOP3A	11173.8	2189.7	2189.7				HeLa GFP-TOP3A siBLM GFP-BLM-PICH-12.czi
		BLM	9313.4		TOP3A	11159.9	2175.8	2175.8				Background	PICH	7494.6		BLM	5799.1	0
		TOP3A	10797.5		TOP3A	11358.5	2374.4	2374.4				Background	BLM	5799.1		BLM	4924.5	-874.6	0
		PICH	20810.1		TOP3A	11141	2156.9	2156.9				Background	TOP3A	12441.7		BLM	5137.4	-661.7	0
		BLM	9587.6		TOP3A	11076	2091.9	2091.9					PICH	9421.7		BLM	5248.6	-550.5	0
		TOP3A	10614.3		TOP3A	11524.7	2540.6	2540.6					BLM	4924.5		BLM	5216.4	-582.7	0
		PICH	24076.6		TOP3A	10797.5	1813.4	1813.4					TOP3A	12364.7		BLM	5716.6	-82.5	0
		BLM	10601.7		TOP3A	10614.3	1630.2	1630.2					PICH	12671.1		BLM	5062.7	-736.4	0
		TOP3A	10956.4		TOP3A	10956.4	1972.3	1972.3					BLM	5137.4		BLM	4645.6	-1153.5	0
	HeLa GFP-TOP3A siCTRL GFP-BLM-PICH-10.czi												TOP3A	12630		BLM	4294.4	-1504.7	0
	Background	PICH	5336.9		BLM	4259.7	0						PICH	12581.1		BLM	4654	-1145.1	0
	Background	BLM	4259.7		BLM	6665.6	2405.9	2405.9					BLM	5248.6		BLM	4920.2	-878.9	0
	Background	TOP3A	6141.2		BLM	6596.5	2336.8	2336.8					TOP3A	12647.9		BLM	4630	-1169.1	0
		PICH	10380		BLM	6988.7	2729	2729					PICH	13099		PICH	7494.6	0
		BLM	6665.6		BLM	7514	3254.3	3254.3					BLM	5216.4		PICH	9421.7	1927.1	1927.1
		TOP3A	8460.9		BLM	7291	3031.3	3031.3					TOP3A	12764.6		PICH	12671.1	5176.5	5176.5
		PICH	10672.7		BLM	7850.7	3591	3591					PICH	16310.5		PICH	12581.1	5086.5	5086.5
		BLM	6596.5		PICH	5336.9	0						BLM	5716.6		PICH	13099	5604.4	5604.4
		TOP3A	8206.1		PICH	10380	5043.1	5043.1					TOP3A	12917.7		PICH	16310.5	8815.9	8815.9
		PICH	10821		PICH	10672.7	5335.8	5335.8					PICH	16037.7		PICH	16037.7	8543.1	8543.1
		BLM	6988.7		PICH	10821	5484.1	5484.1					BLM	5062.7		PICH	13855.4	6360.8	6360.8
		TOP3A	8522.7		PICH	12210	6873.1	6873.1					TOP3A	12718.7		PICH	12666.4	5171.8	5171.8
		PICH	12210		PICH	12027.9	6691	6691					PICH	13855.4		PICH	13892.3	6397.7	6397.7
		BLM	7514		PICH	12605.3	7268.4	7268.4					BLM	4645.6		PICH	15437.3	7942.7	7942.7
		TOP3A	8914.1		TOP3A	6141.2	0						TOP3A	12321.4		PICH	10985.3	3490.7	3490.7
		PICH	12027.9		TOP3A	8460.9	2319.7	2319.7					PICH	12666.4		TOP3A	12441.7	0
		BLM	7291		TOP3A	8206.1	2064.9	2064.9					BLM	4294.4		TOP3A	12364.7	-77	0
		TOP3A	8545		TOP3A	8522.7	2381.5	2381.5					TOP3A	11739.2		TOP3A	12630	188.3	188.3
		PICH	12605.3		TOP3A	8914.1	2772.9	2772.9					PICH	13892.3		TOP3A	12647.9	206.2	206.2
		BLM	7850.7		TOP3A	8545	2403.8	2403.8					BLM	4654		TOP3A	12764.6	322.9	322.9
		TOP3A	8529.1		TOP3A	8529.1	2387.9	2387.9					TOP3A	12002.6		TOP3A	12917.7	476	476
	HeLa GFP-TOP3A siCTRL GFP-BLM-PICH-11.czi												PICH	15437.3		TOP3A	12718.7	277	277
	Background	PICH	7290.1		BLM	7433.4	0						BLM	4920.2		TOP3A	12321.4	-120.3	0
	Background	BLM	7433.4		BLM	10161.8	2728.4	2728.4					TOP3A	12215.9		TOP3A	11739.2	-702.5	0
	Background	TOP3A	11908		BLM	11081.5	3648.1	3648.1					PICH	10985.3		TOP3A	12002.6	-439.1	0
		PICH	16808.4		BLM	10916.2	3482.8	3482.8					BLM	4630		TOP3A	12215.9	-225.8	0
		BLM	10161.8		BLM	10570.7	3137.3	3137.3					TOP3A	11747.9		TOP3A	11747.9	-693.8	0
		TOP3A	13612.1		BLM	11200.8	3767.4	3767.4				HeLa GFP-TOP3A siBLM GFP-BLM-PICH-13.czi
		PICH	16972.7		BLM	10698.3	3264.9	3264.9				Background	PICH	4742.9		BLM	5512.5	0
		BLM	11081.5		BLM	10769	3335.6	3335.6				Background	BLM	5512.5		BLM	5162.5	-350	0
		TOP3A	14262.1		BLM	11463.4	4030	4030				Background	TOP3A	9406.6		BLM	5658.7	146.2	146.2
		PICH	15352.2		BLM	10824.9	3391.5	3391.5					PICH	13973.6		BLM	5211.1	-301.4	0
		BLM	10916.2		BLM	8947.6	1514.2	1514.2					BLM	5162.5		BLM	5744.3	231.8	231.8
		TOP3A	14491		PICH	7290.1	0						TOP3A	9057.4		BLM	5764.8	252.3	252.3
		PICH	17871.1		PICH	16808.4	9518.3	9518.3					PICH	15887.5		BLM	5958.2	445.7	445.7
		BLM	10570.7		PICH	16972.7	9682.6	9682.6					BLM	5658.7		BLM	5242.2	-270.3	0
		TOP3A	13697.2		PICH	15352.2	8062.1	8062.1					TOP3A	9301.8		BLM	5200.3	-312.2	0
		PICH	19185.5		PICH	17871.1	10581	10581					PICH	16384.7		BLM	5229.4	-283.1	0
		BLM	11200.8		PICH	19185.5	11895.4	11895.4					BLM	5211.1		BLM	5241.5	-271	0
		TOP3A	13803.6		PICH	18326.5	11036.4	11036.4					TOP3A	9289.7		PICH	4742.9	0
		PICH	18326.5		PICH	23330.8	16040.7	16040.7					PICH	22987.8		PICH	13973.6	9230.7	9230.7
		BLM	10698.3		PICH	23113.9	15823.8	15823.8					BLM	5744.3		PICH	15887.5	11144.6	11144.6
		TOP3A	13764.1		PICH	21921.1	14631	14631					TOP3A	9477.5		PICH	16384.7	11641.8	11641.8
		PICH	23330.8		PICH	16943.6	9653.5	9653.5					PICH	25460.4		PICH	22987.8	18244.9	18244.9
		BLM	10769		TOP3A	11908	0						BLM	5764.8		PICH	25460.4	20717.5	20717.5
		TOP3A	13144.4		TOP3A	13612.1	1704.1	1704.1					TOP3A	9514		PICH	26591.9	21849	21849
		PICH	23113.9		TOP3A	14262.1	2354.1	2354.1					PICH	26591.9		PICH	20436.7	15693.8	15693.8
		BLM	11463.4		TOP3A	14491	2583	2583					BLM	5958.2		PICH	24417	19674.1	19674.1
		TOP3A	13808		TOP3A	13697.2	1789.2	1789.2					TOP3A	9690.3		PICH	23835.4	19092.5	19092.5
		PICH	21921.1		TOP3A	13803.6	1895.6	1895.6					PICH	20436.7		PICH	16313.9	11571	11571
		BLM	10824.9		TOP3A	13764.1	1856.1	1856.1					BLM	5242.2		TOP3A	9406.6	0
		TOP3A	13634.1		TOP3A	13144.4	1236.4	1236.4					TOP3A	9412		TOP3A	9057.4	-349.2	0
		PICH	16943.6		TOP3A	13808	1900	1900					PICH	24417		TOP3A	9301.8	-104.8	0
		BLM	8947.6		TOP3A	13634.1	1726.1	1726.1					BLM	5200.3		TOP3A	9289.7	-116.9	0
		TOP3A	12396.2		TOP3A	12396.2	488.2	488.2					TOP3A	9456.4		TOP3A	9477.5	70.9	70.9
	HeLa GFP-TOP3A siCTRL GFP-BLM-PICH-12.czi												PICH	23835.4		TOP3A	9514	107.4	107.4
	Background	PICH	15384.3		BLM	6837.2	0						BLM	5229.4		TOP3A	9690.3	283.7	283.7
	Background	BLM	6837.2		BLM	8174.8	1337.6	1337.6					TOP3A	9343.6		TOP3A	9412	5.4	5.4
	Background	TOP3A	8402.4		BLM	9855.6	3018.4	3018.4					PICH	16313.9		TOP3A	9456.4	49.8	49.8
		PICH	18913.6		BLM	10352	3514.8	3514.8					BLM	5241.5		TOP3A	9343.6	-63	0
		BLM	8174.8		BLM	11984	5146.8	5146.8					TOP3A	9235.2		TOP3A	9235.2	-171.4	0
		TOP3A	9099.4		BLM	8693.2	1856	1856				HeLa GFP-TOP3A siBLM GFP-BLM-PICH-14.czi
		PICH	29678.6		BLM	9788.5	2951.3	2951.3				Background	PICH	7032.5		BLM	3958.9	0
		BLM	9855.6		BLM	8930.2	2093	2093				Background	BLM	3958.9		BLM	3451.7	-507.2	0
		TOP3A	9558.6		BLM	9394.6	2557.4	2557.4				Background	TOP3A	7906.3		BLM	3471.6	-487.3	0
		PICH	33059.3		BLM	8305.8	1468.6	1468.6					PICH	15438.1		BLM	3703.5	-255.4	0
		BLM	10352		BLM	8711.3	1874.1	1874.1					BLM	3451.7		BLM	3742.7	-216.2	0
		TOP3A	9597		BLM	7283.1	445.9	445.9					TOP3A	7367.2		BLM	3704.1	-254.8	0
		PICH	35232		PICH	15384.3	0						PICH	16848.7		BLM	3701.7	-257.2	0
		BLM	11984		PICH	18913.6	3529.3	3529.3					BLM	3471.6		BLM	4026	67.1	67.1
		TOP3A	10251.8		PICH	29678.6	14294.3	14294.3					TOP3A	7253.1		BLM	3358.7	-600.2	0
		PICH	23393.9		PICH	33059.3	17675	17675					PICH	18983.2		BLM	3498.3	-460.6	0
		BLM	8693.2		PICH	35232	19847.7	19847.7					BLM	3703.5		BLM	4044.8	85.9	85.9
		TOP3A	9067.8		PICH	23393.9	8009.6	8009.6					TOP3A	7483.4		BLM	3891.9	-67	0
		PICH	27065.6		PICH	27065.6	11681.3	11681.3					PICH	18995.7		PICH	7032.5	0
		BLM	9788.5		PICH	24833.7	9449.4	9449.4					BLM	3742.7		PICH	15438.1	8405.6	8405.6
		TOP3A	9445.7		PICH	24988.2	9603.9	9603.9					TOP3A	7690.2		PICH	16848.7	9816.2	9816.2
		PICH	24833.7		PICH	23158.6	7774.3	7774.3					PICH	16022.1		PICH	18983.2	11950.7	11950.7
		BLM	8930.2		PICH	23202.6	7818.3	7818.3					BLM	3704.1		PICH	18995.7	11963.2	11963.2
		TOP3A	9159.7		PICH	16245.1	860.8	860.8					TOP3A	7421.9		PICH	16022.1	8989.6	8989.6
		PICH	24988.2		TOP3A	8402.4	0						PICH	18434.6		PICH	18434.6	11402.1	11402.1
		BLM	9394.6		TOP3A	9099.4	697	697					BLM	3701.7		PICH	15453.9	8421.4	8421.4
		TOP3A	9099.6		TOP3A	9558.6	1156.2	1156.2					TOP3A	7421.8		PICH	14129.8	7097.3	7097.3
		PICH	23158.6		TOP3A	9597	1194.6	1194.6					PICH	15453.9		PICH	18145.6	11113.1	11113.1
		BLM	8305.8		TOP3A	10251.8	1849.4	1849.4					BLM	4026		PICH	19581.1	12548.6	12548.6
		TOP3A	8871.4		TOP3A	9067.8	665.4	665.4					TOP3A	7491.8		PICH	21663.9	14631.4	14631.4
		PICH	23202.6		TOP3A	9445.7	1043.3	1043.3					PICH	14129.8		TOP3A	7906.3	0
		BLM	8711.3		TOP3A	9159.7	757.3	757.3					BLM	3358.7		TOP3A	7367.2	-539.1	0
		TOP3A	9192.4		TOP3A	9099.6	697.2	697.2					TOP3A	7078		TOP3A	7253.1	-653.2	0
		PICH	16245.1		TOP3A	8871.4	469	469					PICH	18145.6		TOP3A	7483.4	-422.9	0
		BLM	7283.1		TOP3A	9192.4	790	790					BLM	3498.3		TOP3A	7690.2	-216.1	0
		TOP3A	8724.3		TOP3A	8724.3	321.9	321.9					TOP3A	7130.6		TOP3A	7421.9	-484.4	0
	HeLa GFP-TOP3A siCTRL GFP-BLM-PICH-13.czi												PICH	19581.1		TOP3A	7421.8	-484.5	0
	Background	PICH	11567.8		BLM	9324.6	0						BLM	4044.8		TOP3A	7491.8	-414.5	0
	Background	BLM	9324.6		BLM	10863.5	1538.9	1538.9					TOP3A	7436.3		TOP3A	7078	-828.3	0
	Background	TOP3A	9764		BLM	11333.8	2009.2	2009.2					PICH	21663.9		TOP3A	7130.6	-775.7	0
		PICH	14709.4		BLM	12307.8	2983.2	2983.2					BLM	3891.9		TOP3A	7436.3	-470	0
		BLM	10863.5		PICH	11567.8	0						TOP3A	7579.9		TOP3A	7579.9	-326.4	0
		TOP3A	10495.2		PICH	14709.4	3141.6	3141.6				HeLa GFP-TOP3A siBLM GFP-BLM-PICH-16.czi
		PICH	16524.6		PICH	16524.6	4956.8	4956.8				Background	PICH	7973.9		BLM	4993.3	0
		BLM	11333.8		PICH	17816.9	6249.1	6249.1				Background	BLM	4993.3		BLM	5404.3	411	411
		TOP3A	10644.5		TOP3A	9764	0					Background	TOP3A	10682.3		BLM	4837.3	-156	0
		PICH	17816.9		TOP3A	10495.2	731.2	731.2					PICH	14844.3		BLM	4898.6	-94.7	0
		BLM	12307.8		TOP3A	10644.5	880.5	880.5					BLM	5404.3		BLM	5609.4	616.1	616.1
		TOP3A	10996		TOP3A	10996	1232	1232					TOP3A	11442.3		BLM	5563.7	570.4	570.4
	HeLa GFP-TOP3A siCTRL GFP-BLM-PICH-14.czi												PICH	15308.1		BLM	5824.1	830.8	830.8
	Background	PICH	12313.9		BLM	6093.8	0						BLM	4837.3		PICH	7973.9	0
	Background	BLM	6093.8		BLM	8797.7	2703.9	2703.9					TOP3A	10946.6		PICH	14844.3	6870.4	6870.4
	Background	TOP3A	8415.9		BLM	10104.3	4010.5	4010.5					PICH	15432.7		PICH	15308.1	7334.2	7334.2
		PICH	23844.7		BLM	10164.1	4070.3	4070.3					BLM	4898.6		PICH	15432.7	7458.8	7458.8
		BLM	8797.7		BLM	10422.4	4328.6	4328.6					TOP3A	11127.3		PICH	15840	7866.1	7866.1
		TOP3A	9167.5		BLM	10767.3	4673.5	4673.5					PICH	15840		PICH	15894	7920.1	7920.1
		PICH	29994.9		BLM	11328.9	5235.1	5235.1					BLM	5609.4		PICH	15702.9	7729	7729
		BLM	10104.3		BLM	10785.6	4691.8	4691.8					TOP3A	11516.3		TOP3A	10682.3	0
		TOP3A	9476.4		BLM	10681.7	4587.9	4587.9					PICH	15894		TOP3A	11442.3	760	760
		PICH	27554.2		BLM	12577.8	6484	6484					BLM	5563.7		TOP3A	10946.6	264.3	264.3
		BLM	10164.1		BLM	10192.8	4099	4099					TOP3A	11487.7		TOP3A	11127.3	445	445
		TOP3A	9346		BLM	10689	4595.2	4595.2					PICH	15702.9		TOP3A	11516.3	834	834
		PICH	28012.2		BLM	9595	3501.2	3501.2					BLM	5824.1		TOP3A	11487.7	805.4	805.4
		BLM	10422.4		PICH	12313.9	0						TOP3A	11327.6		TOP3A	11327.6	645.3	645.3
		TOP3A	9776.9		PICH	23844.7	11530.8	11530.8				HeLa GFP-TOP3A siBLM GFP-BLM-PICH-17.czi
		PICH	26706.2		PICH	29994.9	17681	17681				Background	PICH	5004.6		BLM	3782.8	0
		BLM	10767.3		PICH	27554.2	15240.3	15240.3				Background	BLM	3782.8		BLM	3786.3	3.5	3.5
		TOP3A	9628.2		PICH	28012.2	15698.3	15698.3				Background	TOP3A	8263.6		BLM	3792.2	9.4	9.4
		PICH	29807.9		PICH	26706.2	14392.3	14392.3					PICH	11531.6		BLM	3691.2	-91.6	0
		BLM	11328.9		PICH	29807.9	17494	17494					BLM	3786.3		BLM	3561.5	-221.3	0
		TOP3A	10029.9		PICH	27765.8	15451.9	15451.9					TOP3A	8518.1		BLM	3645.9	-136.9	0
		PICH	27765.8		PICH	27532.6	15218.7	15218.7					PICH	12471		BLM	4059.5	276.7	276.7
		BLM	10785.6		PICH	32247.5	19933.6	19933.6					BLM	3792.2		BLM	3493.4	-289.4	0
		TOP3A	9969.9		PICH	27780.9	15467	15467					TOP3A	8418.2		BLM	3566.8	-216	0
		PICH	27532.6		PICH	30500.5	18186.6	18186.6					PICH	13119.7		BLM	4401.1	618.3	618.3
		BLM	10681.7		PICH	27381.3	15067.4	15067.4					BLM	3691.2		BLM	4022.7	239.9	239.9
		TOP3A	9835		TOP3A	8415.9	0						TOP3A	8532.1		BLM	3964.6	181.8	181.8
		PICH	32247.5		TOP3A	9167.5	751.6	751.6					PICH	12067.5		BLM	3480	-302.8	0
		BLM	12577.8		TOP3A	9476.4	1060.5	1060.5					BLM	3561.5		PICH	5004.6	0
		TOP3A	10569.3		TOP3A	9346	930.1	930.1					TOP3A	8436.4		PICH	11531.6	6527	6527
		PICH	27780.9		TOP3A	9776.9	1361	1361					PICH	11754		PICH	12471	7466.4	7466.4
		BLM	10192.8		TOP3A	9628.2	1212.3	1212.3					BLM	3645.9		PICH	13119.7	8115.1	8115.1
		TOP3A	9499.4		TOP3A	10029.9	1614	1614					TOP3A	8449.5		PICH	12067.5	7062.9	7062.9
		PICH	30500.5		TOP3A	9969.9	1554	1554					PICH	15929		PICH	11754	6749.4	6749.4
		BLM	10689		TOP3A	9835	1419.1	1419.1					BLM	4059.5		PICH	15929	10924.4	10924.4
		TOP3A	9651.4		TOP3A	10569.3	2153.4	2153.4					TOP3A	8557.4		PICH	17337	12332.4	12332.4
		PICH	27381.3		TOP3A	9499.4	1083.5	1083.5					PICH	17337		PICH	16810.2	11805.6	11805.6
		BLM	9595		TOP3A	9651.4	1235.5	1235.5					BLM	3493.4		PICH	16501	11496.4	11496.4
		TOP3A	9416.1		TOP3A	9416.1	1000.2	1000.2					TOP3A	8608.1		PICH	19248.4	14243.8	14243.8
	HeLa GFP-TOP3A siCTRL GFP-BLM-PICH-15.czi												PICH	16810.2		PICH	16408	11403.4	11403.4
	Background	PICH	10558.1		BLM	8195	0						BLM	3566.8		PICH	12249	7244.4	7244.4
	Background	BLM	8195		BLM	9802.8	1607.8	1607.8					TOP3A	8568.7		TOP3A	8263.6	0
	Background	TOP3A	10395.3		BLM	12454.3	4259.3	4259.3					PICH	16501		TOP3A	8518.1	254.5	254.5
		PICH	22717.3		BLM	13541.7	5346.7	5346.7					BLM	4401.1		TOP3A	8418.2	154.6	154.6
		BLM	9802.8		BLM	12337.6	4142.6	4142.6					TOP3A	8751.3		TOP3A	8532.1	268.5	268.5
		TOP3A	11060.8		BLM	11250.9	3055.9	3055.9					PICH	19248.4		TOP3A	8436.4	172.8	172.8
		PICH	30558.8		BLM	12391.3	4196.3	4196.3					BLM	4022.7		TOP3A	8449.5	185.9	185.9
		BLM	12454.3		BLM	14016.4	5821.4	5821.4					TOP3A	8780.2		TOP3A	8557.4	293.8	293.8
		TOP3A	12957		BLM	10898.1	2703.1	2703.1					PICH	16408		TOP3A	8608.1	344.5	344.5
		PICH	35371.4		BLM	11314.4	3119.4	3119.4					BLM	3964.6		TOP3A	8568.7	305.1	305.1
		BLM	13541.7		BLM	10638.2	2443.2	2443.2					TOP3A	8731.2		TOP3A	8751.3	487.7	487.7
		TOP3A	13174.4		PICH	10558.1	0						PICH	12249		TOP3A	8780.2	516.6	516.6
		PICH	31533.1		PICH	22717.3	12159.2	12159.2					BLM	3480		TOP3A	8731.2	467.6	467.6
		BLM	12337.6		PICH	30558.8	20000.7	20000.7					TOP3A	8163.8		TOP3A	8163.8	-99.8	0
		TOP3A	12103.1		PICH	35371.4	24813.3	24813.3				HeLa GFP-TOP3A siBLM GFP-BLM-PICH-18.czi
		PICH	24768.8		PICH	31533.1	20975	20975				Background	PICH	4497.3		BLM	3601.3	0
		BLM	11250.9		PICH	24768.8	14210.7	14210.7				Background	BLM	3601.3		BLM	3263	-338.3	0
		TOP3A	12188.1		PICH	28206.5	17648.4	17648.4				Background	TOP3A	7973.4		BLM	3322.5	-278.8	0
		PICH	28206.5		PICH	34180	23621.9	23621.9					PICH	10921.4		BLM	3179.6	-421.7	0
		BLM	12391.3		PICH	27860	17301.9	17301.9					BLM	3263		BLM	3262.2	-339.1	0
		TOP3A	12677		PICH	26008.3	15450.2	15450.2					TOP3A	7823.6		BLM	3506.7	-94.6	0
		PICH	34180		PICH	22585.8	12027.7	12027.7					PICH	13071		BLM	3058.2	-543.1	0
		BLM	14016.4		TOP3A	10395.3	0						BLM	3322.5		BLM	3249.4	-351.9	0
		TOP3A	13168.5		TOP3A	11060.8	665.5	665.5					TOP3A	7889.3		BLM	3236	-365.3	0
		PICH	27860		TOP3A	12957	2561.7	2561.7					PICH	12758.2		BLM	3523.8	-77.5	0
		BLM	10898.1		TOP3A	13174.4	2779.1	2779.1					BLM	3179.6		PICH	4497.3	0
		TOP3A	11773.7		TOP3A	12103.1	1707.8	1707.8					TOP3A	7867.3		PICH	10921.4	6424.1	6424.1
		PICH	26008.3		TOP3A	12188.1	1792.8	1792.8					PICH	17545.2		PICH	13071	8573.7	8573.7
		BLM	11314.4		TOP3A	12677	2281.7	2281.7					BLM	3262.2		PICH	12758.2	8260.9	8260.9
		TOP3A	12528.3		TOP3A	13168.5	2773.2	2773.2					TOP3A	7855.5		PICH	17545.2	13047.9	13047.9
		PICH	22585.8		TOP3A	11773.7	1378.4	1378.4					PICH	14687.5		PICH	14687.5	10190.2	10190.2
		BLM	10638.2		TOP3A	12528.3	2133	2133					BLM	3506.7		PICH	14162.8	9665.5	9665.5
		TOP3A	12498		TOP3A	12498	2102.7	2102.7					TOP3A	8021.1		PICH	13051.7	8554.4	8554.4
	HeLa GFP-TOP3A siCTRL GFP-BLM-PICH-16.czi												PICH	14162.8		PICH	16019.1	11521.8	11521.8
	Background	PICH	5948.1		BLM	5534.5	0						BLM	3058.2		PICH	17018.4	12521.1	12521.1
	Background	BLM	5534.5		BLM	7805.4	2270.9	2270.9					TOP3A	7680.5		TOP3A	7973.4	0
	Background	TOP3A	8334.4		BLM	8017.6	2483.1	2483.1					PICH	13051.7		TOP3A	7823.6	-149.8	0
		PICH	11971.8		BLM	7951.6	2417.1	2417.1					BLM	3249.4		TOP3A	7889.3	-84.1	0
		BLM	7805.4		BLM	9027.7	3493.2	3493.2					TOP3A	7862		TOP3A	7867.3	-106.1	0
		TOP3A	11103.2		BLM	8817.9	3283.4	3283.4					PICH	16019.1		TOP3A	7855.5	-117.9	0
		PICH	14060.4		BLM	8612.7	3078.2	3078.2					BLM	3236		TOP3A	8021.1	47.7	47.7
		BLM	8017.6		BLM	10773	5238.5	5238.5					TOP3A	7909.3		TOP3A	7680.5	-292.9	0
		TOP3A	11283.8		BLM	9737.3	4202.8	4202.8					PICH	17018.4		TOP3A	7862	-111.4	0
		PICH	15350.3		BLM	8532.1	2997.6	2997.6					BLM	3523.8		TOP3A	7909.3	-64.1	0
		BLM	7951.6		BLM	9188.2	3653.7	3653.7					TOP3A	8256		TOP3A	8256	282.6	282.6
		TOP3A	11212.5		BLM	8503.7	2969.2	2969.2				HeLa GFP-TOP3A siBLM GFP-BLM-PICH-19.czi
		PICH	19882.6		BLM	9758.8	4224.3	4224.3				Background	PICH	6387.1		BLM	4925.5	0
		BLM	9027.7		BLM	8943.7	3409.2	3409.2				Background	BLM	4925.5		BLM	3986	-939.5	0
		TOP3A	11520.5		BLM	9319.7	3785.2	3785.2				Background	TOP3A	9304.9		BLM	4469	-456.5	0
		PICH	17596.8		BLM	9212.4	3677.9	3677.9					PICH	10476.4		BLM	4132.3	-793.2	0
		BLM	8817.9		PICH	5948.1	0						BLM	3986		BLM	4240	-685.5	0
		TOP3A	11844.5		PICH	11971.8	6023.7	6023.7					TOP3A	9157.2		BLM	4434	-491.5	0
		PICH	19960.4		PICH	14060.4	8112.3	8112.3					PICH	18580.3		BLM	4046.2	-879.3	0
		BLM	8612.7		PICH	15350.3	9402.2	9402.2					BLM	4469		BLM	4538.3	-387.2	0
		TOP3A	10915.4		PICH	19882.6	13934.5	13934.5					TOP3A	9255.1		BLM	4726.3	-199.2	0
		PICH	24009.6		PICH	17596.8	11648.7	11648.7					PICH	12794		BLM	4915.8	-9.7	0
		BLM	10773		PICH	19960.4	14012.3	14012.3					BLM	4132.3		BLM	4828.2	-97.3	0
		TOP3A	12944.4		PICH	24009.6	18061.5	18061.5					TOP3A	9432.9		BLM	4767.9	-157.6	0
		PICH	19668.1		PICH	19668.1	13720	13720					PICH	12797.6		BLM	4493.8	-431.7	0
		BLM	9737.3		PICH	15190.4	9242.3	9242.3					BLM	4240		PICH	6387.1	0
		TOP3A	11753.5		PICH	20825.5	14877.4	14877.4					TOP3A	9562.8		PICH	10476.4	4089.3	4089.3
		PICH	15190.4		PICH	17655.4	11707.3	11707.3					PICH	14157		PICH	18580.3	12193.2	12193.2
		BLM	8532.1		PICH	22655.5	16707.4	16707.4					BLM	4434		PICH	12794	6406.9	6406.9
		TOP3A	11575.4		PICH	18315.1	12367	12367					TOP3A	9612.7		PICH	12797.6	6410.5	6410.5
		PICH	20825.5		PICH	19830.3	13882.2	13882.2					PICH	14732.7		PICH	14157	7769.9	7769.9
		BLM	9188.2		PICH	21123.8	15175.7	15175.7					BLM	4046.2		PICH	14732.7	8345.6	8345.6
		TOP3A	11908.6		TOP3A	8334.4	0						TOP3A	9466.1		PICH	15153.5	8766.4	8766.4
		PICH	17655.4		TOP3A	11103.2	2768.8	2768.8					PICH	15153.5		PICH	15880.5	9493.4	9493.4
		BLM	8503.7		TOP3A	11283.8	2949.4	2949.4					BLM	4538.3		PICH	14789.3	8402.2	8402.2
		TOP3A	11546		TOP3A	11212.5	2878.1	2878.1					TOP3A	9641.7		PICH	14006.1	7619	7619
		PICH	22655.5		TOP3A	11520.5	3186.1	3186.1					PICH	15880.5		PICH	14531.3	8144.2	8144.2
		BLM	9758.8		TOP3A	11844.5	3510.1	3510.1					BLM	4726.3		PICH	14697.6	8310.5	8310.5
		TOP3A	12154.2		TOP3A	10915.4	2581	2581					TOP3A	9763.1		TOP3A	9304.9	0
		PICH	18315.1		TOP3A	12944.4	4610	4610					PICH	14789.3		TOP3A	9157.2	-147.7	0
		BLM	8943.7		TOP3A	11753.5	3419.1	3419.1					BLM	4915.8		TOP3A	9255.1	-49.8	0
		TOP3A	11846.6		TOP3A	11575.4	3241	3241					TOP3A	10002.2		TOP3A	9432.9	128	128
		PICH	19830.3		TOP3A	11908.6	3574.2	3574.2					PICH	14006.1		TOP3A	9562.8	257.9	257.9
		BLM	9319.7		TOP3A	11546	3211.6	3211.6					BLM	4828.2		TOP3A	9612.7	307.8	307.8
		TOP3A	11521.6		TOP3A	12154.2	3819.8	3819.8					TOP3A	9882.6		TOP3A	9466.1	161.2	161.2
		PICH	21123.8		TOP3A	11846.6	3512.2	3512.2					PICH	14531.3		TOP3A	9641.7	336.8	336.8
		BLM	9212.4		TOP3A	11521.6	3187.2	3187.2					BLM	4767.9		TOP3A	9763.1	458.2	458.2
		TOP3A	11634.7		TOP3A	11634.7	3300.3	3300.3					TOP3A	9830.9		TOP3A	10002.2	697.3	697.3
	HeLa GFP-TOP3A siCTRL GFP-BLM-PICH-20.czi												PICH	14697.6		TOP3A	9882.6	577.7	577.7
	Background	PICH	7997.5		BLM	6265.7	0						BLM	4493.8		TOP3A	9830.9	526	526
	Background	BLM	6265.7		BLM	9374.7	3109	3109					TOP3A	9740.9		TOP3A	9740.9	436	436
	Background	TOP3A	8671.8		BLM	9919	3653.3	3653.3				HeLa GFP-TOP3A siBLM GFP-BLM-PICH-20.czi
		PICH	16026.7		BLM	10101.8	3836.1	3836.1				Background	PICH	6195.9		BLM	4768	0
		BLM	9374.7		BLM	10414.7	4149	4149				Background	BLM	4768		BLM	4794.2	26.2	26.2
		TOP3A	11737.4		BLM	10519.1	4253.4	4253.4				Background	TOP3A	9901.9		BLM	4732.8	-35.2	0
		PICH	17446.5		BLM	9704.8	3439.1	3439.1					PICH	18952.2		BLM	4932.8	164.8	164.8
		BLM	9919		BLM	9037.4	2771.7	2771.7					BLM	4794.2		BLM	4812.7	44.7	44.7
		TOP3A	11901.1		BLM	7975.6	1709.9	1709.9					TOP3A	10214		BLM	4530.3	-237.7	0
		PICH	23231.2		PICH	7997.5	0						PICH	16565.5		BLM	5434.3	666.3	666.3
		BLM	10101.8		PICH	16026.7	8029.2	8029.2					BLM	4732.8		BLM	5097.7	329.7	329.7
		TOP3A	12032.2		PICH	17446.5	9449	9449					TOP3A	10340.3		BLM	4925.4	157.4	157.4
		PICH	26663.5		PICH	23231.2	15233.7	15233.7					PICH	15455.9		BLM	4837.4	69.4	69.4
		BLM	10414.7		PICH	26663.5	18666	18666					BLM	4932.8		PICH	6195.9	0
		TOP3A	11827.2		PICH	26113.7	18116.2	18116.2					TOP3A	10204.6		PICH	18952.2	12756.3	12756.3
		PICH	26113.7		PICH	23392.8	15395.3	15395.3					PICH	19938.3		PICH	16565.5	10369.6	10369.6
		BLM	10519.1		PICH	23050.6	15053.1	15053.1					BLM	4812.7		PICH	15455.9	9260	9260
		TOP3A	12009.9		PICH	13755.4	5757.9	5757.9					TOP3A	10598.4		PICH	19938.3	13742.4	13742.4
		PICH	23392.8		TOP3A	8671.8	0						PICH	16625.5		PICH	16625.5	10429.6	10429.6
		BLM	9704.8		TOP3A	11737.4	3065.6	3065.6					BLM	4530.3		PICH	15574.9	9379	9379
		TOP3A	11547.9		TOP3A	11901.1	3229.3	3229.3					TOP3A	10080.4		PICH	15945.1	9749.2	9749.2
		PICH	23050.6		TOP3A	12032.2	3360.4	3360.4					PICH	15574.9		PICH	17791	11595.1	11595.1
		BLM	9037.4		TOP3A	11827.2	3155.4	3155.4					BLM	5434.3		PICH	18590.5	12394.6	12394.6
		TOP3A	11166.6		TOP3A	12009.9	3338.1	3338.1					TOP3A	10656.9		TOP3A	9901.9	0
		PICH	13755.4		TOP3A	11547.9	2876.1	2876.1					PICH	15945.1		TOP3A	10214	312.1	312.1
		BLM	7975.6		TOP3A	11166.6	2494.8	2494.8					BLM	5097.7		TOP3A	10340.3	438.4	438.4
		TOP3A	10670.8		TOP3A	10670.8	1999	1999					TOP3A	10715.9		TOP3A	10204.6	302.7	302.7
													PICH	17791		TOP3A	10598.4	696.5	696.5
													BLM	4925.4		TOP3A	10080.4	178.5	178.5
													TOP3A	10558.5		TOP3A	10656.9	755	755
													PICH	18590.5		TOP3A	10715.9	814	814
													BLM	4837.4		TOP3A	10558.5	656.6	656.6
													TOP3A	10380.3		TOP3A	10380.3	478.4	478.4
												HeLa GFP-TOP3A siBLM GFP-BLM-PICH-21.czi
												Background	PICH	5371.4		BLM	5006.8	0
												Background	BLM	5006.8		BLM	5304.2	297.4	297.4
												Background	TOP3A	9520.4		BLM	4945.6	-61.2	0
													PICH	12242		BLM	4561.6	-445.2	0
													BLM	5304.2		BLM	4547.7	-459.1	0
													TOP3A	9670.3		BLM	3890.3	-1116.5	0
													PICH	11552.2		BLM	4782.1	-224.7	0
													BLM	4945.6		BLM	5025	18.2	18.2
													TOP3A	9600.6		BLM	5026.6	19.8	19.8
													PICH	11753.8		BLM	4915.5	-91.3	0
													BLM	4561.6		PICH	5371.4	0
													TOP3A	9361.3		PICH	12242	6870.6	6870.6
													PICH	13411		PICH	11552.2	6180.8	6180.8
													BLM	4547.7		PICH	11753.8	6382.4	6382.4
													TOP3A	9422		PICH	13411	8039.6	8039.6
													PICH	13478.9		PICH	13478.9	8107.5	8107.5
													BLM	3890.3		PICH	17251.9	11880.5	11880.5
													TOP3A	8904.5		PICH	20305.1	14933.7	14933.7
													PICH	17251.9		PICH	20227.7	14856.3	14856.3
													BLM	4782.1		PICH	14628.2	9256.8	9256.8
													TOP3A	9622.6		TOP3A	9520.4	0
													PICH	20305.1		TOP3A	9670.3	149.9	149.9
													BLM	5025		TOP3A	9600.6	80.2	80.2
													TOP3A	9733.6		TOP3A	9361.3	-159.1	0
													PICH	20227.7		TOP3A	9422	-98.4	0
													BLM	5026.6		TOP3A	8904.5	-615.9	0
													TOP3A	9734.9		TOP3A	9622.6	102.2	102.2
													PICH	14628.2		TOP3A	9733.6	213.2	213.2
													BLM	4915.5		TOP3A	9734.9	214.5	214.5
													TOP3A	9327.1		TOP3A	9327.1	-193.3	0
