# Supplementary material for: Centromere protection requires strict mitotic inactivation of the Bloom syndrome helicase complex
Source: Research Square preprint supplement (doi:10.21203/rs.3.rs-4420374/v1), 2024-05-30
Supplement: Supplementary file 46 [file Fig S4C. HeLa CENPBmCRMI1 BLM_Kinase inhibition_Mask centromeres.xlsx]

## Sheet: Fig 3D_Mask Average Ratio 
Average Ratio	Untreated	PLK1i	CDK1i	MPS1i	AurAi	AurBi
	1.08573	1.98245	3.04053	0.81477	0.511019	2.29644
	1.18158	1.59506	1.92952	0.929448	0.669607	3.67737
	0.811849	3.07534	3.66608	1.53589	1.9181	3.94545
	0.497174	5.81005	1.34166	0.985776	1.13593	2.07974
	2.06641	2.57348	1.57146	1.46995	0.455888	1.51197
	0.474529	3.03964	1.19541	1.2407	1.11047	1.21475
	0.766214	1.34493	2.8314	0.978386	1.06344	1.15501
	1.05446	4.20089	1.387	1.33045	0.947001	1.40009
	1.7719	1.72025	5.16478	1.05541	0.700416	1.20561
	0.608768	2.19849	3.72934	0.732548	0.674422	0.776054
	1.17306	2.62658	2.52206	0.473363	0.761298	3.21185
	1.09774	5.17616	1.85692	1.09671		1.27133
	0.549715		3.12776			3.05803
						2.26638
	1.0107	2.94528	2.56646	1.05362	0.904327	2.07643

## Sheet: Untreated
	HeLa_tetCENPBmCRMI1_STB-MG132_+Dox_BLM-RFP-BubR1.czi																																								Background correction
	Untreated
	Image 03	BLM	CENmCRMI	Image 10	BLM	CENmCRMI	Image 15	BLM	CENmCRMI	Image 23	BLM	CENmCRMI	Image 25	BLM	CENmCRMI	Image 13	BLM	CENmCRMI	Image 18	BLM	CENmCRMI	Image 19	BLM	CENmCRMI	Image 17	BLM	CENmCRMI	Image 6	BLM	CENmCRMI	Image 4	BLM	CENmCRMI	Image 22	BLM	CENmCRMI	Image 14	BLM	CENmCRMI		Image 03	BLM	CENmCRMI	Image 10	BLM	CENmCRMI	Image 15	BLM	CENmCRMI
	Background	11964.9	4881.61	Background	9934.72	3101.3	Background	10404.8	3649.24	Background	9119.29	3009.48	Background	18082.2	6132.13	Background	14674.9	4010.12	Background	10984.8	4952.06	Background	12396.8	6773.72	Background	9648.08	4839.72	Background	12776	5003.73	Background	9497.47	4018.94	Background	10410.4	4085.34	Background	11574.4	5460.54
		12014	5457		9093	3435		9302.62	3734.75		8411.07	3933.05		18599.1	6301.37		14870	4500		10165.2	5994.09		12355.5	7430.5		12502.8	5594.14		12877.7	6506.47		11336.4	5271.97		10969.7	4530.39		12943	5981			49.1232	575.394		-841.716	333.702		-1102.15	85.514
		11435	5544		8350.7	3459.7		8633.02	3869.34		8763.75	3936.72		17818	6137		15843	4675.62		10290.3	5698.62		14209.2	7420.5		9636.36	5434.67		14478.4	6730.98		12370.3	5328.6		11371	4433		12244.7	6195.84			-529.877	662.394		-1584.02	358.402		-1771.75	220.103
		11728	5452		8588	3547		7274	4379		7866	3632		17464.7	7060.26		14717	4495		9899.26	6218.19		13467.3	7397.33		10958.1	5394.19		13057.8	6088.72		9586.74	5207.87		11404.5	4635.5		11945.8	7525.21			-236.877	570.394		-1346.72	445.702		-3130.77	729.764
		11236	5468		9097	4369		10295.2	5824.38		8656	3613		19960	6177		15080	4470		11831.2	5470.83		14199	7418.6		10369.2	5496.37		13638.5	5814.82		10319	5002		11634.5	4634		12951.5	6327.78			-728.877	586.394		-837.716	1267.7		-109.601	2175.15
		12040.6	5583.2		11362.7	3842.77		13678	4978.68		9120.45	4126.52		21257	6126		16032.6	5449.36		10822.1	6494.95		13412.7	7422		10387.5	5366.5		13211.6	6375.61		10969.7	5045		10025	4439		12572	6082			75.7232	701.594		1427.99	741.477		3273.22	1329.45
		12614	5465		8890.5	4022.83		14283	4744		9591.08	4172.28					16076.5	6148.69		12097.4	5754.08		14264.5	7373		10499.3	5413.67		13521.5	7791.22		11296.3	5722		9622	4442		12363.7	7107.33			649.123	583.394		-1044.22	921.536		3878.23	1094.76
		13165	5578		10248.7	3914.67		10397.8	5244.8		9489.82	4399.14		18241	6850		14986.7	5253.82		12752.9	5905.25		11934.7	7606.35		10268.4	5492.07		12725.7	7424.09		9769.5	5183.5		9456.5	4461.5		13298.8	7325.03			1200.12	696.394		313.942	813.373		-6.95843	1595.56
		11338	5456		9884.31	4158.44		13637	4447		9605	4085		16580.4	6894.02		15798.8	6939.93		11444.8	5957.95		11988.4	7391.09		10594	5502.95		13886.6	6565.76		9505	5205		11436.3	4687.02		12064.6	6738.65			-626.877	574.394		-50.4056	1057.14		3232.23	797.764
		11129	5468		9640	3867		8602.75	4935.21		9170	3438		18272.4	6868.07		13342	6349.54		12436.1	6315.38		11135	7180.5		12409.4	5976.23		14303.4	7507.42		10072.6	5441.34		10688	4564		11762.8	7149.69			-835.877	586.394		-294.716	765.702		-1802.02	1285.98
		13505	5543		10774	3879		9900.4	4806.16		8884	3387		17360	6907		14959.2	6660.35		11894.1	6144.45		11253.2	7430.4		11858.5	6477.54		13857.3	6843.03		11826.7	5342.87		12420.1	5157.48		13798	7106			1540.12	661.394		839.284	777.702		-504.374	1156.92
		12726.1	5682.55		9285	4167		13787.3	4248		9490.46	3478.36		16576	6847.05		14215.3	6528.85		11863.7	6398.28		11052.8	7338.45		13120.4	5924.87		12866.9	6539.77		12064.9	5210.2		10830	4599		12206	6477			761.241	800.945		-649.716	1065.7		3382.56	598.764
		11375.2	5466.75		9622	4203		13212.5	4264		8761.1	3752.33		17034	6905.5		13964.7	6536.47		14206.3	6187.72		11564.8	7497.28		13460.9	5381.58		14580.6	5775.75		12184	5100.75		10630	4555		11605	6440			-589.627	585.144		-312.716	1101.7		2807.73	614.764
		12498	5475		12178.6	3997.2		9664	4579		9855	3890		16758.5	6777		12603	6100		12762.1	6563.03		11738.5	7257		12302.5	5707		12739.4	8102.66		9886.75	5198.6		11558	5087.61		11390	6437			533.123	593.394		2243.88	895.902		-740.771	929.764
		11908	5488		11963	4188		9708	4744		9613.44	4103.7		16534	6780		12981	5649.01		14258.3	6901.33		12854	6967		10821.8	5861.52		13355.7	6168.46		10922.4	4905.23		12795.1	5036.84		11964	6444			-56.8768	606.394		2028.28	1086.7		-696.771	1094.76
		12374	5461		12250	4188		13166	4183		8795.05	4493.2		20103.6	8320.08		12089.5	5134.01		11019.4	6509.7		12899	6983.25		11695.3	5912.09		14583.6	5731.71		10834.4	4992.43		10551	4874		11461.2	6489.5			409.123	579.394		2315.28	1086.7		2761.23	533.764
		12369	5474		12504.8	4868.55		12253.6	4067.32		8537	3874		21283.8	6936.12		13646.2	6546.52		12745.5	6227.82		12314.2	7456.7		11968.9	6142		15371	6147.86		10938	5148		11309	4880		14205	6408.5			404.123	592.394		2570.12	1767.25		1848.82	418.084
		11446	5505		8507.33	3231		12906.6	4503.36		9045.02	4095.83		19581.9	7921.67		13633.7	6392.37		10838.9	5989.23		13486.5	7018		10135.6	5575.74		12839.7	5961.17		11691	5384		12929	4853		11170	6432			-518.877	623.394		-1427.38	129.702		2501.86	854.128
		11680	5469		8649.6	3385		9533	4729		8903	4494.42		19365	7904		13393	5309		10479.8	6242.02		12686.5	6970		11004.4	5804.85		12738.7	5793.55		10427.2	4785.66		10535.4	4734.96		12042	6915.69			-284.877	587.394		-1285.12	283.702		-871.771	1079.76
		13605	5476		11248.9	3977.02		9584.71	4740.7		10866	3620		19486.3	7862.67		13443	4632		10367.5	5635.07		11353.8	7489.54		13366.1	6485.37		12638.3	6691.37		11762.3	4607.17		10183	4718		13638.4	7124.37			1640.12	594.394		1314.15	875.722		-820.061	1091.47
		12548	5721.5		8782	3334		9874.95	4234.95		9258.32	3870.62		18429	7916		14217.7	4943.1					12345.5	7218		10656.2	5935.33		13644.4	6579.7		10408.5	4640		10175	4614		13198	6874			583.123	839.894		-1152.72	232.702		-529.819	585.716
		12507	5771		10534	3940		9826	4301		8647.83	4398.05		19776.6	7713.34		13685.3	5665.9					12881.5	6983.5		11507.5	5662.95		12591.2	5964.75		9901	5357		9983	4602		12019.8	6993.93			542.123	889.394		599.284	838.702		-578.771	651.764
		12259	5714.5		12517	3610		10595.7	4789.08		9867.4	3683.58		21418.7	6902.98		14635.2	5600.12					12611.5	6990		11571.8	6036.35		13103	6265.22		11793.2	5430.25		10306.4	4661		12794	6744			294.123	832.894		2582.28	508.702		190.959	1139.84
		12317.9	5779.19		11940	3639.55		9905	4062		10554	3567.5					14478.9	6051.94					12119.4	7477.37		10370.2	5423.33					10858.5	5696.07		10111.8	4634		12810.9	7319.28			353.026	897.587		2005.3	538.248		-499.771	412.764
		12665	5700		12745.7	5177.85		11343.5	4585.5		10033	4203		20257.3	7512.67		13548	5399					12580	7232.33		9852	5138					10893.7	5768.99		10090.1	4665.75		12184	6878			700.123	818.394		2811.01	2076.56		938.729	936.264
		12922	5763		11793.1	4154.71		9883	4532		8575	4164		23210	6627		14178	5433					12529.5	6957.5		10581.3	5269.7					11441.5	5430.94		11830.6	5028.82		12806.2	7156.76			957.123	881.394		1858.41	1053.41		-521.771	882.764
		13192.1	6067.12		12129	3670		9734	4748		10277	3379.38		19994	6911		16147	4613					13553.5	6977.5		9242.71	5566.9					11095.8	5249.36		10216	4621		12088	7075			1227.27	1185.51		2194.28	568.702		-670.771	1098.76
		13300	5684		11630	4052		9544.69	4780.57		8491	4203		18774.5	6946.5		15053.3	5669.34					12564.3	7391		9824.33	5673.11					10810.4	5221.57		12513.8	4916.27		13390	7052			1335.12	802.394		1695.28	950.702		-860.081	1131.34
		11950	5680		11327.5	4346.22		9368	4862		9059.11	3904.35		18303	7221.49		16150.3	4818.13					12881.5	6982.5								10694	5130		10494	4674.17		13143.9	7526.61			-14.8768	798.394		1392.8	1244.92		-1036.77	1212.76
		14117	5701		12833.6	4005.73		9005	4724					18639	7067		17706	4757					12180	6960.67								11510.8	5227.01		10421	4643		12043.9	6597.69			2152.12	819.394		2898.85	904.436		-1399.77	1074.76
		14832	5740.5		9893.64	4589.05		9532	4887					19064	7514		14857.1	4838.91					12714	6943.5								9442	5000		10735.5	4638.25		11250.8	6822.83			2867.12	858.894		-41.0805	1487.75		-872.771	1237.76
		11838	5747					11234.6	4674.27					18985	7411								12582.4	7091.67								9946	4967		11685	4726		11968.7	6567.62			-126.877	865.394					829.871	1025.03
		13322.7	5797.71					10239.3	4902.67					18003	6909								11036	7464								12930.8	5354.2		11528	4639		11643	6298			1357.82	916.102					-165.438	1253.43
		13476.1	5760.57					9811.68	4881.3					19468.8	7010.27								11140.7	6950.67								9512.53	5211.43		11094	4613.5		12366	7232			1511.23	878.965					-593.091	1232.06
		13494	5690					9199	4683					17925	6921								12451.5	6978								11172.1	5184.14		12751	4638.5		10519	6615			1529.12	808.394					-1205.77	1033.76
		13913.3	5737.67					9308.75	3769.25					18885	7373								12051.3	7701.5								11430	5066		10985.6	4782.31		11420.6	6374.18			1948.46	856.06					-1096.02	120.014
		14497	5680					9504	4845					17621	6910								12020.7	7640.33								9670	4946		10647	4623		11136.6	6864.6			2532.12	798.394					-900.771	1195.76
		15466.1	5886.24					9901	4776					18075.7	7071.31								12755.6	7964.14								9261.36	4403.53		11429.2	4616.39		12230	6317			3501.25	1004.64					-503.771	1126.76
		13031	5696					8767.56	4378.44					18532	6909								13354.7	7598.72											11782.7	4672.15		12128.3	6308.67			1066.12	814.394					-1637.21	729.201
		12991	5686					9719.75	4908.5														12994	7393											10929	4586		10890	6331			1026.12	804.394					-685.021	1259.26
		13611.5	5622					8934	4586														12761	7389														10118	6630			1646.62	740.394					-1470.77	936.764
		13573.2	5610.5					10553	4766														13232	7379.5														9809.84	6714.44			1608.37	728.894					148.229	1116.76
		12262	5422					10042	4637														13238.5	7408														9638	6694			297.123	540.394					-362.771	987.764
								10207	4821														13524	7402														10887	6711									-197.771	1171.76
																							13555.7	7408.82														11093	6615
																							12812	7389														12556.6	6563.9
																							13197.5	7400														11075	6643
																							13789.3	7389.67														11984.8	7109.5
																							12396	7554
																							10644.7	7244.83
[truncated: 69 more columns]

## Sheet: BI2536
	HeLa_tetCENPBmCRMI1_STB-MG132_+Dox_BI2536_BLM-RFP-BubR1																																								Background correction
	BI2536
	Image 06	BLM	CENmCRMI	Image 07	BLM	CENmCRMI	Image 15	BLM	CENmCRMI	Image 17	BLM	CENmCRMI	Image 9	BLM	CENmCRMI	Image 13	BLM	CENmCRMI	Image 3	BLM	CENmCRMI	Image 4	BLM	CENmCRMI	Image 10	BLM	CENmCRMI	Image 8	BLM	CENmCRMI	Image 11	BLM	CENmCRMI	Image 5	BLM	CENmCRMI					Image 06	BLM	CENmCRMI	Image 07	BLM	CENmCRMI	Image 15	BLM	CENmCRMI
	Background	10267.5	4922.47	Background	14609.3	4678.77	Background	11988	2722.92	Background	3094.58	1326.8	Background	14003.7	6911.38	Background	9633.77	1939.51	Background	24413.8	5748.02	Background	14003.8	2161.62	Background	11551.8	4797.13	Background	9906.62	2574.04	Background	8835.67	2504.76	Background	15447.9	2152.03
		16857.1	8176.58		16121.7	5024.4		15052.2	3108.93		5871	1931		18512.4	8010.76		10722.3	2312.33		34378.4	8978.31		20131.7	2952.02		11573.6	5228.64		10571.6	3244.21		10561.3	3272.99		19375.2	2878.36						6589.62	3254.12		1512.35	345.635		3064.19	386.012
		17244.9	7078.27		19621.8	6571.15		15576	3489		7883	1800		17508	7987.06		10740	2301		31246.7	9745.05		17425	2843		11653	5200		11321.2	3503.08		7373.5	2344.5		18480.7	2821.59						6977.41	2155.81		5012.45	1892.38		3588.01	766.081
		13806.6	5843.22		16805.3	6408.12		14357	3481.5		6704	1865		17010	7899		10427	2509		28232.2	8139		18733.4	3082.46		11705	5211		10274	3038		8278	2344		22865.2	3078.96						3539.05	920.754		2196.01	1729.35		2369.01	758.581
		16019.2	7345.65		18151	6273.23		15315.8	3529.83		3663.89	1535.56		16601	7903		10564.5	2568.93		27809.9	8517.47		17202.6	3064.02		12966.5	5321.99		10128	3006		7753.4	2390.8		20763.8	2939.67						5751.72	2423.19		3541.62	1594.46		3327.84	806.915
		16627.5	6625.78		17294	6115		14607.4	3527.5		6069.97	1854.37		18043	7862		12526.1	2583.85		26301.6	7968.07		17229	2867.27		11275.5	5413.48		11987	3644		9025	2848		19025.6	2963.2						6360	1703.31		2684.66	1436.23		2619.38	804.581
		12263.5	6829.5		17467.5	6391.44		15910	3521		6906	2010		15361.5	7789.5		11719	2539		23790.2	7685.31		16494.1	2942.33		10563	5440		10665	2969		7694.8	2362.8		19660.9	2958.08						1995.98	1907.03		2858.11	1712.67		3922.01	798.081
		12216	5635		18885	6794.67		15574.4	3759.07		6836	1857		17603	8284.11		11658.8	2626.68		23113	7625		17299	2867		11547.8	5467.81		12020.6	3284.74		9447	2867		21712.4	3176.52						1948.48	712.535		4275.65	2115.9		3586.45	1036.15
		12114	6858		18387	6232		15813	3610		2960	1320		14634.8	7812.5		11644.7	2529.7		24574.4	7749.23		15978	2839		15551.3	6388.87		11791	3175		10087.4	3022.44		18228.5	2671.62						1846.48	1935.53		3777.66	1553.23		3825.01	887.081
		12749.4	6975.89		17980	6117		15325.9	3673.52		6129.9	1800.31		17399	7864		12379.2	2710.95		23034	7417		16376	3033.39		13126.7	6360.71		11862	3018.28		11522	3597.8		22803.5	3204.75						2481.92	2053.42		3370.66	1438.23		3337.89	950.601
		10067	5315		18386	6160		15583.5	3901.56		4869	1701.33		17712.6	8004.29		9784	2509		24787	7519		15468.5	2817		14041.6	6021.32		12268	4194.86		8436	2350		18045.4	2771.84						-200.524	392.535		3776.66	1481.23		3595.54	1178.64
		14261.3	6875		17335.1	6178.88		14632.2	3719.43		2516	1201		18315	7891		10587	2312		28967.9	9697.16		17662	2890.5		15188.8	6178		11016	3179		8188	2393		16447	2647						3993.81	1952.53		2725.79	1500.11		2644.21	996.509
		13987.2	6842.67		16833	6131		14157.1	3508.67		7055	1937		16993	7866		11179	2520		32466.8	9101.31		19129	2890		13139	5892		12568.1	3542.93		11305.2	3975.19		23157.9	3320.73						3719.64	1920.2		2223.66	1452.23		2169.12	785.748
		13744	6843		18775.3	6346.54		14225	3494		7332	1977		14721	7767		11904	2875.39		32007.1	9365.44		15580.9	2910.79		12793.4	6338.95		10806	3176.5		10222.5	2340.5		20381	2985						3476.48	1920.53		4165.92	1667.77		2237.01	771.081
		13444	6908		17835.4	6193.94		13836	3486		7415	1730		16908.6	7936.6		10843	2481.5		27212.8	8430.1		17419	2879.7		13514.8	6316.57		13032.1	3368.4		8884	2332		22202.5	3031.12						3176.48	1985.53		3226.11	1515.18		1848.01	763.081
		15235.6	7277.05		16906	6190		13436	3526		6721.67	1901.13		17108	7860		10774	2479		30311.4	8653.39		14978	2872		16774.9	7545.5		12444	3340		13012.4	3649.18		18458	2746						4968.04	2354.59		2296.66	1511.23		1448.01	803.081
		12458	5732		15966	6119		13901	4104		5584.93	1727.55		14787	7889		11710.8	2694.09		28490	8483		16431	2839		13757.6	5926.58		10993	3177.5		12554.9	3333.27		20658.1	2917.92						2190.48	809.535		1356.66	1440.23		1913.01	1381.08
		12489	5694		16252	6123		16077.3	4438.77		5340	1890		14643	7853		10316	2424		28663.7	8388		16767	2813		15776.3	6643.79		11816.3	3335		10390	3519		20315.3	3002.1						2221.48	771.535		1642.66	1444.23		4089.36	1715.85
		12314	5680		17562	6088		14563.8	3495.83		5859.69	1784.41		16178.2	8124.11		11281	2353		30198.1	8948.41		18981.8	2974.62		17765	6126		12296.9	4071.15		12091	3851.95		17597.5	2812.75						2046.48	757.535		2952.66	1409.23		2575.84	772.915
		12002	5637		17474	6092		15994.8	3698.84		6101	1770		16263.5	7890.5		11476	2338		31305.5	8780.61		15493.2	2934.36		14750.8	6063.49		11098	3165		11692.2	3978.35		20592	3019						1734.48	714.535		2864.66	1413.23		4006.79	975.917
		10995	5694		16762.7	6319.98		14327	3559.17		5536.12	1770.96		17492	7969		10554	2479		30872.7	8641.32		15969	2808		14376.4	6466.52		13102.3	3406.15		10417	3610		22181	2994						727.476	771.535		2153.34	1641.21		2339.01	836.248
		11254	5661		19143	6123		14199.8	3608.46		5240.17	1684.77		17175	7891		11091	2331					15933	2844		13288	5831		12294.8	3649.01		11783.5	3557		17964	2742						986.476	738.535		4533.66	1444.23		2211.77	885.538
		11209	5712		16774.5	6283.44		13861	3472		3265.5	1478.5		16196.6	7756.22		11337	2307					15973.5	2873.9		15071	6440		12862.3	4120.14		10362	3473.8		16276	2750						941.476	789.535		2165.2	1604.67		1873.01	749.081
		10964.2	5786.17		14847.4	6199.79		12976	3478		5435.69	1740.52		15147	7863		11427	2305					14322	2821		13544	5868		11386	3570.5		11138	3523		19600.4	2910.32						696.648	863.706		238.043	1521.02		988.009	755.081
		13693	6842		15291	6137		13718	3472		3790.75	1454.25		17670	7881		11269	2522					17339.6	3077.76		13122	5828		11650	3554		11877	3546.5		18087.1	2834.79						3425.48	1919.53		681.662	1458.23		1730.01	749.081
		13709	6831		15256	6137		15429	3529		5550.64	1750.4		16336.4	8058.89		10301	2583					14935	2835.75		13690	5886		11220	3592		12068.3	3580.71		16028	2742						3441.48	1908.53		646.662	1458.23		3441.01	806.081
		14264	6829		13140	4765		14380	3495		3803.5	1536.25		18351	7970		10888	2536					15423	2839.5		12731	5829		12013	3182		11126	3567		20132.7	3163.47						3996.48	1906.53		-1469.34	86.2318		2392.01	772.081
		11339	5650		12653.7	4753.67		13857.3	3689.62		3307	1426.5		17325.2	7946.58		12123	2595.72					15563	2810		14085.5	6520.5		11737	3568.78		12729.5	3827.38		20780	2986						1071.48	727.535		-1955.67	74.8984		1869.3	966.705
		15674	6924		14012.5	5002.95		15293.5	3479.75		6765	1980		16030	7790		11178	2469					16441	2836		13883	6442.31		11261	3596		13828	3543		17879.5	2745.51						5406.48	2001.53		-596.833	324.18		3305.51	756.831
					13877	4831		13426	3502		6108.5	1806		17404	7935		11284	2477					17119.8	3077.67		13619.6	6123.69		12139.1	3756.69		12014.9	3640.38		19552	2931.53									-732.338	152.232		1438.01	779.081
					17915	6172.8		16953	3469		4450	1637		17140	7891		13289.9	2925.41					17641	3102.76		11545.3	5837.17		12989.9	3766.53		12650	3615		18455	2840									3305.66	1494.03		4965.01	746.081
					14743	4784		16342	3488		7443.33	1991.67		14593.7	7794		14343.1	3505					17131.4	2875.12		13509.1	6148.22		11061.5	3467.73		11403.1	3637.87		18438	2656									133.662	105.232		4354.01	765.081
								15370	3470		6035.39	1802.29		15229	7542		10284	2301					22869.3	3407.34		13958.9	5229.12		11475	3843.19		12255	3690.2		20501.9	2780.26												3382.01	747.081
								16248.7	4272.67		7905	2015.5		14477.1	7840.5		10732	2505.5					18399.2	2934.69		13499	5220.5		12842	3318		12544.4	4012.43		19069	2671.5												4260.68	1549.75
								12638	3409		7650.43	2046.57		15716.8	7916.51		11551.5	2525.66					15918	2862.25		13658	5863.23		9394	3140		11617.5	3671.5		16484	2600												650.009	686.081
								14382	3707		6303.74	1881.63		14334.2	7846.4		10543	2492					16756.7	3090.07					12708	3804.5		10783	3735		18798	2687												2394.01	984.081
								15688	3938		8426.33	2174.33		14035	7768.5		11037	2287					21827	3601.94					11479.8	3129.89		10852.9	3657.49		21244	3166.41												3700.01	1215.08
								13207	3516		7611.95	2086.28		18890.4	8022.63		11050.4	2351.39					17792.3	2570.55					10956	3042		11372.8	3684.33		25476.3	2990.75												1219.01	793.081
								13449	3420.5		9779	2321		16893.7	7996.33		12180.6	2808.58					20811.6	3538.4					13979.5	3827.28		12005.4	3695.6		18238	3052												1461.01	697.581
								15562.6	3814.3		7913.15	2205.21		15949.2	8053.59		13489.6	3088.27					19660.5	3310.16					11229	3358.57		13264.8	3927.84		16964.2	3052.52												3574.57	1091.38
								13702	3539		10776.5	2658.25		17915.6	7918		11421.6	2335					20501.7	3363.49					10618	3016		10810.3	3627.57		20436.2	3286.21												1714.01	816.081
								14924.4	3989.49		10835	2660		20885.1	8021.69		10281	2776					14997.9	2574.83					13735.8	4235.94		12381.2	3770.16		18385	3031												2936.42	1266.57
								13442.2	3463.82		10553.6	2609.88					10785	2306					20510.7	3325.81					10733	3094		10666.3	3667.65		18969	3029												1454.16	740.903
								13851	3753		8953.82	2290.7					11237	2432					22174.5	3344.75					12422.5	3356.25		10745	3167.36		18121.2	2798.41												1863.01	1030.08
								14719	3458		9310.52	2310.59					10647	2288					17406.9	2630.46					12213.8	3863.5		12892	3694															2731.01	735.081
								14134	3950.86								11954.7	2554.85					21520.8	3302.67					13579.6	4216.74		12770.7	3809.26															2146.01	1227.94
								13276	3434								10658	2371											11501	3265		10378	3099															1288.01	711.081
																	11880	2373.5											11535	3270.5		12779.1	4060.62
																	10752.9	2788.62											11920	3249		10609	3099
																	10875.8	2440.68											12745.6	3520.49		11654.2	3123
																	11449	2559											13319.5	3770		12684.2	4139.36
																	10901	2380.5											11586.2	3464.04		11843.8	4154.26
																	11788	2446											13616.5	3843.3		11776.6	3353.65
																	10951.3	2785.67														13303.3	3884.03
																	11974	2508														10967	3205
																	11713.2	2578.89														12904.3	3841.31
																	10943	2568														13041	3685
																	11025	2562														12631.2	3719.81
																	10661.5	2215.92														10158	3206
																	10626	2091														11593.6	3533.69
																	11077.1	2131.77														13396.4	3708.8
[truncated: 63 more columns]

## Sheet: RO3306
	HeLa_tetCENPBmCRMI1_STB-MG132_+Dox_RO3306_BLM-RFP-BubR1																																								Background correction
	RO3306
	Image 06	BLM	CENmCRMI	Image 08	BLM	CENmCRMI	Image 15	BLM	CENmCRMI	Image 20	BLM	CENmCRMI	Image 24	BLM	CENmCRMI	Image 4	BLM	CENmCRMI	Image 25	BLM	CENmCRMI	Image 1	BLM	CENmCRMI	Image 3	BLM	CENmCRMI	Image 12	BLM	CENmCRMI	Image 7	BLM	CENmCRMI	Image 23	BLM	CENmCRMI	Image 22	BLM	CENmCRMI		Image 06	BLM	CENmCRMI	Image 08	BLM	CENmCRMI	Image 15	BLM	CENmCRMI
	Background	13855.7	2571.19	Background	10473.8	3387.15	Background	11151.1	2607.64	Background	7758.84	3642.59	Background	9592.11	3518.22	Background	8310.75	2722.88	Background	8443	4078.73	Background	10856.2	3635.88	Background	11280.2	1827.04	Background	10945.5	2942.81	Background	11607.5	2924.74	Background	9575.11	3061	Background	10912.6	3296.86
		14205.6	3207		11858.3	3840.12		14680.5	3314.38		8066.04	4529.82		10386	4111.93		9832.18	3904.73		10617.3	5142.2		12115.3	4386.45		12087	2036		11900.3	3418.86		15372.1	4012.2		9713.82	3350.04	1	13353.8	3629			349.946	635.813		1384.59	452.961		3529.4	706.732
		13943.2	3312.99		11521	3871		14665.8	3465.8		8956.35	4722.44		9275.96	3911.46		9931.02	3903.39		10429	5155		12348.7	4217.34		13526.2	2095.06		11125	3336		15214.9	4260.89		12215	4278	2	13419.8	3625.5			87.4745	741.806		1047.24	483.845		3514.65	858.16
		13936.8	3066.61		12412	3808		15275.3	3522.95		8115.04	3972.37		9424	3835.5		8358.01	3660.66		10939	5174		12254	4197		12838	2214.3		12300	3316		13697.8	3841.08		14368.4	4296.29	3	13568.7	3637.67			81.1053	495.421		1938.24	420.845		4124.2	915.305
		16270	3608.29		11187	4742		12922.1	3166.37		8382.11	4944.44		9493	3808		10683.6	3475.44		12000	5517.97		12795.9	4480.5		12476.7	2094.67		11640	3322		15662.4	4911.79		12593	4280	4	12939	3649			2414.27	1037.11		713.239	1354.85		1771.04	558.723
		17056.7	3962.62		12742	5016.22		12401.5	3106.26		8728.66	4477.77		9970.5	3804.5		10178.9	4685.37		10600.7	5168.67		10551	4206		11847	2033		14025.7	3594.97		13985	4279		12841.3	4703.82	5	12470	3639			3201.03	1391.43		2268.22	1629.07		1250.41	498.613
		17341	3356.32		13368.5	4444.89		14539.4	3472.81		10142.5	4795.64		10552.8	4777.25		9849.48	4031.39		11852.6	4809.62		10905	4219		12921	2168.56		14154.2	4136.94		15012.5	3862.06		11902	4290	6	14502	3623			3485.3	785.128		2894.77	1057.74		3388.26	865.172
		15771.7	3861.89		14318.3	5530.76		11954	3278.8		9429.97	5861.76		10205.3	4122.94		9463.05	3690.62		11077	5291		10788.3	4255.4		12732	2039		12704	3204.5		15109.3	3846.55		12389	4295.5	7	13692	3624			1916.05	1290.7		3844.53	2143.6		802.868	671.157
		18069.3	3992.31		12423.9	4983.33		16852.6	3618.79		10872.6	5370.07		12960.2	5648.65		11779.8	3780.78		12717.5	5652.86		13589.9	5518.02		14191	2451		13033.2	3757.58		13417	3635		11923	4276	8	12856	3710			4213.63	1421.12		1950.11	1596.17		5701.52	1011.15
		17843	3482.46		14609.2	4863.37		12590	3326.82		10924	5454.96		11373.3	4418.1		8608	4028		12553	4639		13090.2	4951.52		11782	2050		12200.5	3284.68		13086	3672.09		13444.1	4487.44	9	14080	3658			3987.29	911.276		4135.44	1476.21		1438.9	719.173
		17869.6	3808.3		12441	5147		14427.5	3633.8		9676.42	5314.68		9921.19	4103.79		9329.52	4155.93		11187	5171		11073.8	4234.75		16499.9	2524.08		13212.9	3481.1		13800.4	3439.02		12746.7	4319.33	10	13160.5	3658			4013.9	1237.11		1967.24	1759.85		3276.38	1026.15
		16916.6	3230.98		12592	5113		16430.2	3873.06		8282.5	4474.58		11117.4	4527.73		8711	3967		11719	5226		12143.8	5006.93		13639.7	2128.41		13368.5	3631.05		13806.9	4029.07		11555.5	4289.5	11	13578.2	5299.88			3060.91	659.789		2118.24	1725.85		5279.12	1265.42
		16119.5	2985.58		12655.6	5487.22		13884	3370.07		9560.07	5151.02		12290.8	4096.52		8219.38	3251.46		11618.4	5096.2		12237.3	4825.04		13517	2447		11948.2	3271		12402	3519		13369.7	4353.5	12	12736.4	5093.91			2263.77	414.388		2181.88	2100.07		2732.87	762.431
		15988.9	3507.38		12745	4619		14815.2	3300.13		9772	5266.75		11798.1	4853.89		8861.03	3713		12210.6	5147.2		10883.5	4518.42		12956	2124		12198.3	3368.97		11796	3516		11245	4293	13	12821	5034			2133.17	936.191		2271.24	1231.85		3664.11	692.492
		18683.1	3424.23		12519.3	4260.71		13492.6	3201.22		8673.06	5264.28		12420.2	4487.87		8341	3958		11995.5	5735.72		10871.7	4267.34		13261.8	2130.5		13239.6	3659.32		13868	3525		13202.3	4462.23	14	14855.3	5623.23			4827.39	853.045		2045.57	873.557		2341.49	593.582
		16487.8	2945.17		11387	4594.07		13654.9	3276.08		10393.1	5888.95		13444.9	6256.12		10534	3566.43		10415.7	5380.33		12665	4685		14759.9	2412.22		12666.7	3295.23		15855	4000		12381.9	4786.31	15	12729.1	5156.88			2632.08	373.985		913.189	1206.92		2503.82	668.441
		15676	3371.29		12742.2	4835.14		14065.6	3651.47		9903.5	5712.14		12607.9	4979.86		11556.8	3820.44		14600.3	7193.85		12050.4	4648		14336.5	2445.5		16261.7	4455.84		14982.8	4304.85		11859.4	4368.47	16	13451.5	5155.91			1820.34	800.105		2268.41	1447.98		2914.46	1043.83
		16311.7	3228.81		12867	4507		14479.4	3484.51		10720	7019.25		10526.9	4037.22		8310	3285		12372.4	5436.53		10672	4406		14353	2418		13153.9	3295.22		12715	3590		12576	4308	17	11714	5018			2456.04	657.626		2393.24	1119.85		3328.32	876.869
		20355.6	3919.1		14071.2	5226.35		14366.1	3216.51		11545.1	5484.12		11199	4101.34		8482.63	3362.27		12511.8	5864.67		11143.3	4291.36		12779	2152.5		12006	3219		12573.7	3381		10941	4353.33	18	15948	5065			6499.93	1347.92		3597.47	1839.19		3215.02	608.868
		17177.2	3622.06		13433.4	3943.76		14397.1	3595.47		10928.5	5674.98		10719.9	4443.56		10526	3489		11625.1	5608.57		11975.1	4229		14296	2435.33		12999.7	3389.35		13705	4035		11993	4368	19	13923	5038			3321.52	1050.87		2959.69	556.604		3246.04	987.824
		15161.5	3426.56		12337	5050.47		13623.5	3260.19		9414.07	4354.37		12272.6	4744.33		9655.55	3996.07		11566	5445		12622	4124		12597	2088		13962.5	3433.36		13135	4079		11668	4317	20	12647.9	5051.44			1305.84	855.374		1863.27	1663.31		2472.39	652.55
		16599.5	3570.95		11783	4794		13788.9	3411.72		11758.6	6484.59		11813.3	4399.86		11336.3	4625.22		13001.2	6408.34		12684.7	4393.75		11862	2046		11893	3361		13893.6	4463.61		11255	4252.33	21	13658.4	5351.34			2743.82	999.765		1309.24	1406.85		2637.78	804.081
		15910.1	3055.61		12258.7	4427.08		14202.6	3080.53		9848.95	5183.37		9975.84	4027.29		8522.44	3207.38		10837.2	5283.05		11807.7	4109.33		13241	2442		14582.6	3757.99		13364	3596		11142.6	4237.22	22	11435	5061			2054.38	484.424		1784.9	1039.92		3051.53	472.882
		14070.1	3134.69		11894	4399		14963.3	3849.18		10793.5	6174		11386.3	4358.94		8413	3165		12244.4	5128.87		11241.7	4242.26		13357	2279.81		13467.2	3705.12		12292	3511		11835	4293	23	12861	5379.21			214.448	563.501		1420.24	1011.85		3812.21	1241.53
					11724.9	4106.63		12869.5	2925.71		10091.7	5379.99					8949	3865		11709	5353		14811.4	5971.2		10974	2160		13645.7	3282.62		13074.5	3616.47		12431	4387	24	13503	5358.86						1251.14	719.474		1718.39	318.072
					12272	4429		12005.8	2935.28		9029.03	4702.12					11030.4	4349.74		13188.4	5448.34		10951	4169		12599	2053		13589.9	3545.41		14279	4252.14		10438	4137	25	11275	3711.43						1798.24	1041.85		854.698	327.639
								13175.4	3361.94		10072.4	5077.88					10186.1	4248.12		12423.8	5215.72		12446.6	4179.9		14186	2223		14113	3536		13141	4036		12006	4154	26	11939.1	3808.43									2024.35	754.302
								11143.1	3025.35		8748.54	4276.7					9515	4208		13048.6	5067.73		12809.6	4689.32		14088.2	2150.48		14987.4	4102.91		16807.8	3921		11921.2	4590.39	27	12662	5019									-7.94868	417.707
								12900.6	3019.05		8070	4077					10414.6	4915.9					12816.2	5357.21		13564	2249		14537.1	3518.8		16114	3935.5		10856.5	4127.25	28	11934	5014									1749.5	411.405
											8426	4077					10575.2	3808.29					10220	4199		12596	2185		12204.2	3475.57		16374.1	4758.43		10661	4186	29	13337	5057.33
											8603	4125					11151.2	4008.69					10853.2	4321.5		13336	2211		12613.8	3419.32		17888.3	4217.42		10093	4126.5	30	12533	5041
											9063	4134					9792.9	3998.73					11253	4119		12465	2178		11703.1	3287.8		12149	3477		11386	4334	31	13981.2	5044
											8064.5	4101.5											11652.4	4263.5		12057.2	2201.75		11847	3176		12582	3452		10699	4302	32	15319.2	5112.18
											9224	4059											13073.5	4771.96		12550	2159		13411.6	3898.34		13052	3415		12062.1	4426.7	33	15140.1	5089.92
											7966	4087											13451	5064		12961.8	2110.46		14035.1	3887.96		12587.9	3541.34		9768	4148	34	12760.8	3653.6
											9838	4058											15143	5062		13144.1	2281.4		11618	3734.5		13710.7	3602.46		11167	4414.57	35	14956	5082.83
											8002.02	4213.56											12906.5	5074.75		13269	2113					14737.5	3975.21		9814	3115	36	14060	5172
											9203.67	5596.83											13316.6	4176.37		13879.3	2188.97					14089.4	4207.46		9684	4150	37	12071.7	3725
											9742.15	5771.52														13043	2117					14975.9	3949.07		12189	4365	38	12511.5	3690
											9637.24	5750.29														11516.3	2009.98					13131	3446		11147	4324	40	12076	3628
											10328.3	6340.91														13076	2119					13008.3	3455.33		9573	3104
											8685.62	5693														12477	2038					12672	3421		10259.4	4241.97
											9586	5591														15583.2	2645.7					12374	3452		9831.33	3094.67
											11526.3	5705.36														12369.2	1980.15					14255.9	3697.06		9654	3061
											11058.8	5766.46														12006	1930								9586	3173
											9817.5	5263.25														11406	1930								10084	3044
											10190.9	5853.72														13364	2099.34								9030	3099
											9883.51	4934.96														13500.9	2117.5								9926.67	3102.33
																										12507.9	2065.35								10118	4150.67
																										12418.7	2001.33								10521	3025
																										12506.5	2016								11781.2	4451.17
																										12690	2067
																										12987	2086
																										12162.4	2051.44
[truncated: 69 more columns]

## Sheet: Reversine
	HeLa_tetCENPBmCRMI1_STB-MG132_+Dox_Reversine_BLM-RFP-BubR1-03.czi																																								Background correction
	Reversine
	Image 03	BLM	CENmCRMI	Image 5	BLM	CENmCRMI	Image 7	BLM	CENmCRMI	Image 9	BLM	CENmCRMI	Image 15	BLM	CENmCRMI	Image 23	BLM	CENmCRMI	Image 16	BLM	CENmCRMI	Image 17	BLM	CENmCRMI	Image 18	BLM	CENmCRMI	Image 24	BLM	CENmCRMI	Image 27	BLM	CENmCRMI	Image 24	BLM	CENmCRMI					Image 03	BLM	CENmCRMI	Image 5	BLM	CENmCRMI	Image 7	BLM	CENmCRMI
	Background	11051.9	2807.57	Background	8731.99	2977.64	Background	10427.8	4813.2	Background	9323.17	3486.93	Background	8286.66	3960.46	Background	11898.2	3054.87	Background	9207.79	4051.52	Background	13169.4	4291.05	Background	13910	5992.29	Background	11495.2	4207	Background	10645.8	4020.41	Background	10004.1	4351.41
		12440	3445.12		10488.9	3347.62		10026	5673.71		10311.3	4646.16		8384.73	4935.58		11414	3860.24		8736.04	4580.47		13370.6	5086		13631.7	6938.42		10994.3	5177.2		11088	4862		10294.8	5265.25						1388.07	637.555		1756.94	369.985		-401.818	860.51
		9574.25	4544		10935.7	3314.67		10595.9	5304.12		9919	4400		7164.21	5143		10821.7	4058.2		9977.17	4741.9		13913	5027		14173	6763		12660	5535		9142.98	5157.77		9811.79	5633.08						-1477.64	1736.43		2203.67	337.027		168.104	490.922
		12234	3428		10776	3291.5		11087.8	6413.01		10298.7	4417.33		8051	4757		12499.2	3651.41		9201.18	5172.31		14968.7	5121.1		13562	6862		13042	5458.33		10929.3	5358		10138	5262						1182.11	620.434		2044.01	313.86		659.98	1599.81
		12545.5	3408		9294.19	3896.62		10066.5	5890.34		10003	4391		7623.32	4775.73		10462	3927		10543.2	4851.74		15210.6	5188.58		15969	6859		11872	5553		12926	5356		10483.4	5972.49						1493.61	600.434		562.199	918.981		-361.334	1077.14
		12303.5	3393.5		8398	3750		12123	5414		9732.5	4410.75		7654.19	4831.52		10497	3891		9362.58	5083.65		14714.2	5871.34		16778.7	6886.62		12173.2	5832.1		10891.5	5552.06		10490.5	4847.54						1251.61	585.934		-333.995	772.36		1695.16	600.804
		12609	3401		9847.37	4566.14		13853.6	5502.17		10222	4382		7927.39	5405.34		10766	3859		8892.34	5957.26		15408.3	4999.63		14499	6622		12230	5517		10532.8	5264.85		10575	4630						1557.11	593.434		1115.37	1588.5		3425.79	688.971
		12574	3408		9002.66	4326.94		9468	5672		10023	4397		7694	5325		12070	4069.1		9949.31	4966.88		14962	4614		15242.5	6640.5		11971.3	5137.19		9550	5345		9768	5553						1522.11	600.434		270.665	1349.3		-959.837	858.804
		12644	3401		8425.44	3927.48		9934.5	6378.25		8673.28	4316		8666	5332		11038.5	3878.5		10207.6	4980.47		12214.7	5461.11		17212	6777		11230.8	4970.6		9725	5066		10712	5534						1592.11	593.434		-306.551	949.836		-493.337	1565.05
		12987.5	3393		11063.1	3689.77		11159	6155		9286.04	4669.47		8121.73	5430.69		11185	3891		9838.58	4841.39		16310	6671		12692	6640		13754.9	6145.14		10121	5007		10021	5521						1935.61	585.434		2331.13	712.132		731.163	1341.8
		9245.42	4616.16		10078.6	3904.08		10727.6	6749.63		9570.35	5248.64		8604.77	5610.82		11453	3870		10068.5	4662.5		15358	6644		13641.6	8176.43		15606	6315.28		8829	4995		9779	4618						-1806.48	1808.6		1346.59	926.443		299.756	1936.43
		13090	3403		8447	3780		11069.2	6518.52		9686.96	4840.5		8026	5307		12095.7	3867.56		10244	4913.5		14798.4	5360.06		17517	7705		11214.9	6023.18		8635	5054		12613.4	4676.25						2038.11	595.434		-284.995	802.36		641.343	1705.32
		10614.8	5077.34		9948.69	3997.1		10571.3	6727.74		15024	4583		8231	5308		13081.5	3641.59		8838.3	4715.11		13511.1	5104.89		20356	7662		13857.2	7071.14		10725.5	4607.7		10391.3	6007.03						-437.14	2269.77		1216.69	1019.46		143.466	1914.55
		10185	5381.81		9302.21	3913.84		10785.2	6870.56		12115.8	4623		8322.67	4902.03		12783.5	4074.77		12522.2	4753.95		15471	5056		12940.2	6922.57		11117.5	5618		10778	4491		12987	4672						-866.863	2574.25		570.216	936.198		357.343	2057.37
		11646	4420.84		8873.52	3630.04		12487	6556		9095.06	4452.62		7987	5309		12868.5	3579		9192.62	4620.65		13109	5017		13830.1	7794.94		11745.1	5102.41		10711.1	5208.19		11651	4742						594.081	1613.28		141.527	652.403		2059.16	1742.8
		9093	4490		8856	3772		10586.9	5905.71		11471.4	4814.21		8842.25	5497.48		13418	3541		10858.8	5208.74		13069.5	4971.17		16086	7596		14130.4	5748.27		10507.5	5197.78		13019	4627						-1958.89	1682.43		124.005	794.36		159.085	1092.51
		15278	4282.5		8756.2	3457.11		11045.2	5073.67		11191	4352.29		9009.8	5440.6		13022.6	4015.07		10645.8	4980.2		13304.1	5096.64		15568.5	8007.09		13622	5342		11152.9	4888.02		9783.14	5446.57						4226.11	1474.93		24.2015	479.467		617.363	260.471
		10290.3	4826.46		8869	3547		11596	5254		10042	5283.55		9179.94	5798.84		14579	3887		10247.8	5668.04		15492	5009		15900	7736		12811.6	5693.59		11386.5	5314.59		10714.8	5452.11						-761.615	2018.9		137.005	569.36		1168.16	440.804
		11397.6	4952.64		8797.02	3581.53		11606.9	5169.7		8953	4285		9572.61	5358.26		12943	3812		9362	5287		12808	5021		13608.6	6927.77		12697	5019		11709	5015		10971.9	5497.34						345.695	2145.07		65.0212	603.892		1179.11	356.508
		10797	4860		9573.93	3768.82		11124.3	6078.65		10379	4146		8591.49	5514.56		14260	3919		9803.79	5282.27		12967.8	4918		14148	7146.14		13784.8	6440.5		11171	5387.53		10519	5445						-254.893	2052.43		841.936	791.178		696.477	1265.45
		9489.32	4478.91		8366	3416		11090	5876		10563.6	4405.11		9132.54	5474.21		14099.4	3673.83		10109	5120		11970	4927		15155	7612		11919.4	6777.93		11960.1	4989.79		9996.71	5450						-1562.57	1671.34		-365.995	438.36		662.163	1062.8
		10024.4	4121.82		9873	3392		11114.7	6308.92		9192.26	4223.64		9290	5145		12505	3832		10605.9	4805.61		12964	5092		14799	7614.5		12771.2	5318.49		11522	4967		9655.71	5497.06						-1027.47	1314.25		1141.01	414.36		686.824	1495.73
		9410.61	4526.01		9643	3392		11117.2	6392.61		10014.7	4264.08		9116.97	5167		12818.5	3777.45		10234.7	5259.96		13108	4939		15351	7604		12010.4	6064.57		11396.9	4424.17		9895	5420						-1641.29	1718.44		911.005	414.36		689.342	1579.42
		9004.44	4577.42		8391	3486		11435.5	5753.21		9391	4309		8358.05	5336.81		13172	3872		10805	4948.67		12967.3	5299.91		15531	8401.14		11809	5940		11421.9	4904.32		9660	5441						-2047.45	1769.86		-340.995	508.36		1007.63	940.017
		9600.4	4438.5		10191	4489.65		11483.6	5523.57		9201.9	4134.54		8336	5076		13974.5	4057.19					13826.1	5326.74		14124	7712					11550.1	4973.91		10965	5445						-1451.49	1630.93		1458.96	1512.01		1055.73	710.369
		9952	4382		8868.57	3665.46		11023.1	7817.15		9646	4282		8004	5081		12777	3774					15036.8	5330.87		15197.9	7925.96					10184.9	5916.61		9237	5511						-1099.89	1574.43		136.574	687.817		595.227	3003.95
		10177	4026		9118	3737		11910.5	4938		9525	4306		8196	5122		13373.5	3898.49					14390.7	5218.55		15053	8366					11682.5	4722.52		10067	5398						-874.893	1218.43		386.005	759.36		1482.66	124.804
		10784	4154.22		7727.07	3525.41		11984	5009		9760.06	4852.95		8645.84	5250.56		11425	3956					15730.4	5395.44		14055	6927					11279.3	5411.74		10532.7	5806.2						-267.867	1346.65		-1004.92	547.767		1556.16	195.804
		9349	4502		8517	3597		10845.9	5974.42		10076	4637.73		8391	5099		13257	3899					12263	4922		15481.2	7230.52					10056	5367		9298	5420						-1702.89	1694.43		-214.995	619.36		418.103	1161.22
		11396	4403		7649	3516		10190.6	5453.91		9671.84	4733.1		8409.33	5126		11941	3933					15522.2	5185.47		15178.4	5748.64					11027.9	4785.66		9128	5398						344.107	1595.43		-1082.99	538.36		-237.229	640.717
		9379.54	4662.74		8559.5	3616					10049.4	4451.27		9026.76	5160.69		13300	3977					15352	5125		15269	5620					9805.75	4613.25		9116	5493						-1672.35	1855.17		-172.495	638.36
		10204.8	5768.45		8673	3900					9557.75	4478.75		9023.5	5199.5		13366	3866					14692	5092		15303	7750.5					11385.3	4743.84		8836	5434						-847.117	2960.88		-58.995	922.36
		9442.62	5602.24		9742.91	4111.06					10227.3	4494.33		8902.5	5096		13077.2	4096.53					12613	4968.78		15014.5	7118					10127	6479.43		8951	4735						-1609.27	2794.68		1010.92	1133.42
		10344.3	4220.69		8617	3601					11732	4477		8568	5107		12932.6	4255.82					13606	5087		14923.2	8199					11375.6	4761.03		9474.7	4859.74						-707.547	1413.13		-114.995	623.36
					10663	4228					10223.1	4791.31		9109.69	5289.24		14352	3999					14625	5110		16665.5	7790.25					10425	5881		10270.7	5511.88									1931.01	1250.36
					7779	3461					10220.6	4223.64		9705	4215		13057	3575					13537	5158.33		14240.8	8985.53								9440	5481									-952.995	483.36
					9159	4221					10241.7	4265		10458	4205.5		13791.5	3685.69					15414	5116		14748.4	8483.25								9686.42	5081.89									427.005	1243.36
					7724	3464					11715.4	4329.78		9077.16	5519.38		12253	3959					15704.4	5502.69		14567	8435								9404	4757									-1007.99	486.36
					8736.39	3926.83					10520.9	4433.5		9201.2	4209.4		12217	3977					15276	5076		14425	7676								9479	4746									4.39635	949.186
					9549.78	3946.61					10639	4214		9287.5	4187		14396.1	3935.84					16210	5095		13774.6	8343.6								10921	4778									817.785	968.97
					8682	3817					10525	4202		9919	4172		13548.5	4155.54					14256.5	5300.35		13630	8424																		-49.995	839.36
					7846	3802					11119.7	4476.42		10679.7	4870.04		12851	3984					15723	5075		13822	5617																		-885.995	824.36
					7781.5	3820.5								9630	4168		12935	3933					11901.2	5215.79		14034	5623																		-950.495	842.86
					8360.67	3847.33								9238	5387		13575	4030					15186.1	5426.2		14326.1	8433																		-371.328	869.693
					8337	3787								9647	5408		12995	3728.02					15573.6	5591.88		14015	8347																		-394.995	809.36
					9308	3471								9521	5343		12118	3612					13118.5	5228.95		13861.7	7832.65																		576.005	493.36
					9528.61	3539.71								9161.54	5514.1								11931.6	5087.6		14912	6067.51																		796.612	562.074
					10508.6	3538.58								11528.6	4916.69											15008	5863																		1776.63	560.943
														9375	5386											15405	7244.81
														10772.8	5689.01											12800.4	7065.58
														8409	5279											15295	7465
														8928.19	5329.23											14987	7480
														12336.3	4173.33											14898.3	7395.67
																										15519	7385
																										15461	7524
																										14914	7627
																										15534	7495
																										15140.6	7417.67
																										15551	7445
																										13670.4	7866.95
																										12922	7390
[truncated: 63 more columns]

## Sheet: MLN8237
	HeLa_tetCENPBmCRMI1_STB-MG132_+Dox_MLN8237_BLM-RFP-BubR1-02.czi																																								Background correction
	MLN8237
	Image 02	BLM	CENmCRMI	Image 03	BLM	CENmCRMI	Image 04	BLM	CENmCRMI	Image 7	BLM	CENmCRMI	Image 10	BLM	CENmCRMI	Image 12	BLM	CENmCRMI	Image 14	BLM	CENmCRMI	Image 16	BLM	CENmCRMI	Image 17	BLM	CENmCRMI	Image 18	BLM	CENmCRMI	Image 20	BLM	CENmCRMI								Image 02	BLM	CENmCRMI	Image 03	BLM	CENmCRMI	Image 04	BLM	CENmCRMI
	Background	13635.2	4474.4	Background	11967.4	6070.84	Background	12003.5	4327.86	Background	11931.7	3857.69	Background	11539.5	3685.41	Background	11560.1	5661.55	Background	13233.3	6253.46	Background	12534.9	4109.57	Background	12318.7	3787.25	Background	12343.6	4166.68	Background	12715.8	4056.16
		14288.3	5240.3		11272.8	7254.42		12880.4	5095.21		10110.2	4106.8		11553	4214.46		13340.2	7369.15		14646	7334.87		12777.8	5696.1		14461.4	4485.37		12088.3	5165.73		13947.8	5732.24									653.096	765.901		-694.623	1183.57		876.862	767.353
		14022.7	5081.67		11269.7	6984.33		11192.3	5451.02		10591.8	4289		12603.8	4848.95		13518.9	6752.12		15394	6994		13817.8	7185.49		13522	4381		12039.7	4870.96		14189.6	4471.5									387.483	607.268		-697.741	913.483		-811.285	1123.16
		12573.5	5379.91		13508	8315.71		12775	4987.5		10972.6	4208.04		11831.1	4106		14612.5	6749		13567	7062.5		12728.8	5749.89		14362	4371		12456	5527.46		13003.4	5219.33									-1061.7	905.515		1540.58	2244.87		771.451	659.638
		14074.4	6064.46		13050.5	8414.05		11574	5181		10604	4106.5		11568.2	4238.46		13210.5	6904.51		13984	7033		13838.9	7318.32		14329.4	4833.76		13582.1	5060.53		12931	5241									439.239	1590.06		1083.07	2343.2		-429.549	853.138
		11836	5186		11634.6	7107.67		11938	4965		10432	4203		11076	4159		13188	6664		13836	6979		13037.6	7259.01		14110.7	4804.12		12974.2	4808.17		12767.4	5418.17									-1799.18	711.601		-332.882	1036.83		-65.5486	637.138
		11855.2	5246.67		10996.2	7488.39		10704.8	4880.93		10424	4152		11269	4110		11975	6857		13894	6982		15232.9	5883.12		13467.3	4650.65		12783.3	4819.19		13365.1	4743.37									-1780.02	772.268		-971.248	1417.54		-1298.75	553.07
		15017	6039		11343.5	7006.84		10527	5191		10990	4264		11387	4187		11370.5	6695		13818.6	7137.35		13761.9	5709.4		15489.5	4756.5		13013	4752		15218.4	4473.21									1381.82	1564.6		-623.931	935.991		-1476.55	863.138
		13098	5984		10576	6850		11700	4785		11342.7	4451.54		11517	4037		11315.5	6919.84		14216.1	6981.8		14151	6599.43		13250	4657		14135.5	4766.08		12963.3	4907.05									-537.184	1509.6		-1391.44	779.155		-303.549	457.138
		12139.1	5325.33		11377	6805		11948.7	4771.67		10677	4270		11975.4	4781.25		11840	6710		12730.5	7301.31		15631.3	6235.56		14170	4700		12191	4564		13394	4614									-1496.06	850.934		-590.44	734.155		-54.8819	443.804
		15603.2	6092.49		11778	6766		11898	4794.5		10763	4273		11191.1	4082.94		12302	6680		13595.9	6813.77		15808	6193		15171.2	4828.8		12745.8	4738.14		12465.7	5961.91									1968.02	1618.09		-189.44	695.155		-105.549	466.638
		15135.5	6026.62		11458	6895		11134.2	5762.48		10619.6	4369.17		11101	4172		11283	6710.38		13622	6801		15413.8	5607.76		11881.7	4544.78		12180.5	4825.51		13913	5097									1500.32	1552.23		-509.44	824.155		-869.33	1434.62
		11100.4	5065.65		11888	6875		12572.8	5054.93		10735	4286		11821.6	4295.65		11274.1	6975.83		15073	6959		15576.8	6638.04		12056.1	4395.91		12172	4782		14362	4408									-2534.8	591.254		-79.4396	804.155		569.204	727.07
		14475.4	6228.9		11470.5	6893.5		12960.4	4968.41		10624	4270		12477.7	4414.83		11153	6746		13497.8	6726.47		14686	6153		13684.8	4842.14		12251	4697		14368	5291									840.227	1754.5		-496.94	822.655		956.897	640.544
		13135.5	5546		12376.4	7607.07		12626.2	6011.81		11537	4289		11092	4132		10686.6	6812.8		11951.8	7115.53		16047	6134		14092	4782		12835	4656.34		12202.4	4498.86									-499.684	1071.6		409.007	1536.23		622.61	1683.95
		11837	4855		13966.2	6851.15		13728	5579.14		14542	4233		11355	4177		12264.8	6969.26		14480	6725		13392.7	6237.81		13457	4476		13494	4680		12440	4635									-1798.18	380.601		1998.72	780.31		1724.43	1251.27
		11570	4882		14052.7	7187.94		12616	5239		13542.7	4314.78		11369	4688		12186.5	6804.5		17873.7	7729.46		13903	6144		12325.7	4213.27		13689	4678		12416.8	5581.05									-2065.18	407.601		2085.29	1117.1		612.451	911.138
		11242	4919		13243	6788		11126.2	5152.59		11087.7	4299.33		12081.8	4491.15		10632.5	6802.9		13328	6708		13432	6215		13021.5	4406.5		12586	4453		12677	5341									-2393.18	444.601		1275.56	717.155		-877.313	824.73
		14320.1	5694.67		12739.9	7413.23		12436	4794		11216	4326.67		11687.2	4197.15		14013.5	6770.29		13143.8	6638		13100	6152		12801.1	4494.51		13526.7	4638.61		11966.2	5441.2									684.945	1220.27		772.494	1342.38		432.451	466.138
		14638	5486		10430.1	7647.75		11178.2	6461.7		11113	4302		11068	4123		12434.7	6816.37		15378.2	7094.91		13120	5995		11759	4469		12588	4461		11820	5277									1002.82	1011.6		-1537.33	1576.91		-825.332	2133.83
		13454.2	4950.74		13368	6769		12099	6087.77		12549	4262		12607	4471.66		14329.9	6753.45		13488	6525		13291	5907		12838.7	4981.69		12773.3	5792.99		11953	4430									-180.96	476.342		1400.56	698.155		95.433	1759.9
		14088.2	6227.66		11189.3	8307.07		13595	4895		13046.8	5135.37		12199	4340.5		19926	6549		13594	6573		14343.9	5938.95		11572	4132		13151.8	5119.7		13226.4	5451.21									453.015	1753.26		-778.154	2236.23		1591.45	567.138
		14161.3	6143.15		12269.2	7504.59		14042	5499		15681	4113		10710	3997		14378	6538		13770.8	6870.05		13917	6355.52		11840	4307		13681.7	5149.04		11152	4438									526.155	1668.75		301.734	1433.74		2038.45	1171.14
		12800	6021		11505.2	8534.49		12863	4492		12911	4208		12444.5	4619.5		11227.5	7110.88		13127	6486		14755	5453		12553.9	4793.01		12427.2	4985.48		11217	4501									-835.184	1546.6		-462.192	2463.64		859.451	164.138
		14883.7	6650.31		13606.1	6854.78		13627	4495		12102	4174		11373	4379		12314	7426		13057	6608		14694	5320		12353	4197		12267.3	5449.21		11105.7	4563.55									1248.49	2175.92		1638.62	783.933		1623.45	167.138
		13031	6047		13051	6746		12305.5	4556.5		11694	4138		12043.8	4524.36		12099	7405		12605.1	7001.5		15000	5548		14560.8	5345.96		12159	4788		12531.8	4459.56									-604.184	1572.6		1083.56	675.155		301.951	228.638
		13617	6006		13660	6812		12389.9	5650		12163.8	4148.6		11890	4315		11767.8	8584.66		12815	7018		15985.3	5828.46		11870.1	4693.75		13037	5640		11478.5	5038.17									-18.1839	1531.6		1692.56	741.155		386.326	1322.14
		16444	5591		10496	7034		12805	4796		13658.3	4821.95		12270	4319		10347.9	6670.18		15461	6569		15565	5686		11799	4294		12542.6	5163.71		11425	5279									2808.82	1116.6		-1471.44	963.155		801.451	468.138
		14210	5496		10206	7122		12948.2	4563.59		12965	4543		11103.1	4467.19		10872.3	7815.17		14220.2	7521.92		14141.7	5383.67		14689.5	6204.03		12458.4	4988.22		11990.5	4527.75									574.816	1021.6		-1761.44	1051.16		944.661	235.728
		13968.4	6118.53		13455	6789.67		13192	4484		14019	4550		11784	4360					14458.9	6740.45		14110.3	6044.05		12739.4	5099.61		13314.4	5215.23		12012	4539									333.23	1644.13		1487.56	718.822		1188.45	156.138
		13287	5642		13900	6735		13410	4903.56		13859	4607		11196	4049					13298.3	7220.86		12520.8	6156.98		12777	4321		13279.4	6253.26		11343	4554									-348.184	1167.6		1932.56	664.155		1406.43	575.695
		14510.7	6384.89		10523	7093		13192	4530		14031	4526		11756	4470					14026	6529		13456.4	5955.36		12152	4381		12979	5647.5		11920	4538									875.483	1910.49		-1444.44	1022.16		1188.45	202.138
		13676.3	5501		10514	7118		13756.8	4865.4		14337	4618		11475	4620					13897.4	6562.62		13591.5	5779.5		12571	4372		12473	4945		12080	4401									41.1494	1026.6		-1453.44	1047.16		1753.25	537.538
		14136	7132.58		13702	6780		13636	4498		13660	4529		12176	4111					13338	6766		14288	5408		12351	4293		12656	4908		12651	4570									500.866	2658.19		1734.56	709.155		1632.45	170.138
		14940	5825		12059	7897		13775	4843		12935.1	4401.43		13364.8	4226.55					13297.2	6879.5		14624.1	5601.7		13296	5732		11856	4921.6		12414	4543									1304.82	1350.6		91.5604	1826.16		1771.45	515.138
		15249	6318		13617	7888		14432	5538.5		12412	4532		11553.8	4885.54					12587.1	6870.64		13799	5681		12197	4355		12871	5172.11		12492.6	4650.85									1613.82	1843.6		1649.56	1817.16		2428.45	1210.64
		12996	6318		11284.8	7813.58		13263	4506.5		12576.1	5925.35								12776.1	8255.01		14389	5415		12023	4391.25		13311	4896		11658	4457.5									-639.184	1843.6		-682.69	1742.73		1259.45	178.638
		15907	6306		10929	7449		11435.1	7359.92		13413	4529								13989	7631		14031	5713.5		12064.6	4400.7		12867.5	4968.5		12057	4600.5									2271.82	1831.6		-1038.44	1378.16		-568.498	3032.06
		14051	6771					13277	4859.5		12179	4191								15276	7601		12610	6010		11589	4477.07		11866	4899		11962	4608									415.816	2296.6					1273.45	531.638
		15250.6	6342.48					11591	5444		11985	5531								13630.9	7122.53		15060	5693		11429.8	4525.21		11930	4910		11768	4404									1615.38	1868.08					-412.549	1116.14
		14103.9	5172.15					13246	4855		12525.8	5610.6								13143	7693		12596.2	5936.67		11211	4357		11864.4	4911.75		12774.6	5245.42									468.69	697.748					1242.45	527.138
		15657.6	6455.16					12790	4813		12192	5625								12642.7	8249.01		13894.3	5698.67		12250	5105					13746.1	4535.46									2022.44	1980.76					786.451	485.138
		16048	6014					11822.4	5802.38		14012.4	5222.89								14362.8	7336.7		14761	5837.73		11820	4656					14078.1	4466.5									2412.82	1539.6					-181.1	1474.51
		12212.6	5072.87					10544	5418		12076	5667								13683.5	7783		17295.7	7348.68		12007	4643					12045	4538									-1422.58	598.468					-1459.55	1090.14
		15102	6841								13607	4784								14435.8	7089.88					13991.4	5701.27					12493	4564									1466.82	2366.6
		11366.7	4940								11586.6	4785.6								14463	7038					12409.5	4606.5					15234.1	4649.44									-2268.52	465.601
		15345	6808								11510	4814.5								13351	7022					12030.5	4984.5					15678	4573									1709.82	2333.6
		11504.3	4997.29								13166.1	5152.14								14194	6771					12408	4656					11519	4966									-2130.9	522.887
		17477	5582								12919	4786								16359	6749					11936	5151					11720	4879									3841.82	1107.6
		14733.5	5763.94								11504	4840														11935.7	4763.03					13347	4423									1098.32	1289.54
		15308	5577								12139.2	4545.36														11097	4428					13622	5092
											11401	4785														11238	4488					12661	4481.42
											13822.1	5515.49																				14571	4612
											12943	5187
											12109	4774
											12309	4803
											12186.3	4802
											12419.3	4933.12
[truncated: 57 more columns]

## Sheet: AZD1152
	HeLa_tetCENPBmCRMI1_STB-MG132_+Dox_AZD1152_BLM-RFP-BubR1-06.czi																																											Background correction
	AZD1152
	Image 06	BLM	CENmCRMI	Image 08	BLM	CENmCRMI	Image 11	BLM	CENmCRMI	Image 14	BLM	CENmCRMI	Image 28	BLM	CENmCRMI	Image 31	BLM	CENmCRMI	Image 30	BLM	CENmCRMI	Image 29	BLM	CENmCRMI	Image 27	BLM	CENmCRMI	Image 25	BLM	CENmCRMI	Image 5	BLM	CENmCRMI	Image 31	BLM	CENmCRMI	Image 13	BLM	CENmCRMI	Image 9	BLM	CENmCRMI		Image 06	BLM	CENmCRMI	Image 08	BLM	CENmCRMI
	Background	12934	2570.14	Background	8403.9	2536.19	Background	8213.26	2818	Background	9632.66	3003.33	Background	11259.7	4197.71	Background	11096.5	4769.88	Background	9251.36	3225.74	Background	11061	3871.49	Background	9361.1	4572.66	Background	8977.75	4106.5	Background	8981.31	3194.52	Background	11105.2	4965.23	Background	9502.85	3196.23	Background	8595.79	3690.99
		13569.6	2947.95		10298.4	3097.91		9828.97	3534.93		12627.1	4508.91		12287	4920		13024.7	5496.36		11148.4	5194.68		13684	5095		9718.57	5963.2		9006.6	4846.6		11871	3615.2		13647.1	5827.17		11076.7	3561.33		9246.56	3933.44			635.629	377.818		1894.46	561.717
		12481	2768		9437	2941		10564.9	3880.41		11375.6	4086.34		11433.8	4896.89		14570	5290		10542.7	5342.39		13450.9	5145		9386	5840		9194.26	4599.84		11972.7	3803		12443	5830		11738.3	3941.2		9322.89	4680.63			-452.952	197.864		1033.1	404.807
		13815	2850		8936	2960		11400.6	3722.76		10517	3703		13970	4798		12789.1	6152.52		9642.08	4943.69		12742.5	5386.46		11511	4647		10075.8	4572.17		11835	4128.79		12677.4	6069.86		10016.1	3480.87		10128.9	4699.76			881.048	279.864		532.1	423.807
		14564.4	3224.53		10288.2	3144.61		11641.1	3462.21		11621	3737		11952.6	4968.51		12420.4	5553.06		11488.9	4843.13		13984	5150		10588.3	4882.09		9185.5	4313.5		11666.8	3765		11352.5	5937.82		11473.8	3561.97		9987.1	4766.46			1630.44	654.391		1884.29	608.414
		13565	2835		9923	2921		10842.4	3835.86		10980	3703		12901.6	4938.68		13411	5236.38		10544.5	4794		13996	5142		9300.35	6014.9		10167.7	5686.88		11532.3	3964.87		10709	5766.5		1163.89	3657.61		10664.8	4057.45			631.048	264.864		1519.1	384.807
		14325.7	3016.47		9966.36	3028.68		11077.4	3325.03		11486.2	3791.32		11753.9	4391.23		12257.2	5559.71		9092	4771.67		13659.8	4198.72		10387	4694		10997	5622		8505	4317.62		12063.6	5834.78		12960.7	4301.2		11166.6	4873.82			1391.79	446.335		1562.46	492.492
		12670	2684		11310.5	3356.48		12304.7	3363.91		10770	3719.5		12917.8	4669.04		10454.2	5402.98		11190.9	4874.83		14274.8	5404.93		9944	4648		9436.31	6079.65		8446	3348		12262.7	6123.93		11157.3	3984.02		10464	4377.07			-263.952	113.864		2906.59	820.283
		13118.6	2841.31		12117.3	3428.42		10534.3	3347.31		10929	3927		12917	4725		11550.8	5827.16		11026.5	5634.74		11388	4735.97		9439.44	6004.16		9760.56	5406.94		12422.5	4014.25		12260.8	5860.16		11927.4	3539.98		9868.29	4501.97			184.624	271.174		3713.4	892.229
		13968.5	2762.25		9669.1	3000.23		12516	3580.33		11639	3714		13649.3	4936.86		11950.5	5366.5		10343	5166		10929.8	4631		8746	5914.67		9118	5570		12612	5675.6		11790.4	6211.63		11403.3	3641.5		9339.2	4288.6			1034.57	192.11		1265.2	464.034
		13340.3	3024.6		11617.5	3926.5		10351	3686		11903	3778		12595.6	4829.6		12375	5397		10428.4	4337.88		12526	4150		8911	5837		8728	5111		12314.4	3881		11678.3	5901.88		11759.1	4382.79		10348.4	4260.22			406.346	454.46		3213.6	1390.31
		14769.4	2998.56		10424.7	3067.25		11521	3602		11623	3907		11323	4931		14338	5297		10190.1	5102.82		10763	4522.81		9809.5	5687		10194.6	5304.45		10580	3447.79		11642.2	5834.88		11300.5	3584.56		11662.6	5456.4			1835.47	428.421		2020.84	531.055
		13355	2902		11541.3	3214.38		11854.6	4316.2		12196	3723		13015	4896		9924.42	5314.79		11329.3	5422.68		11711.5	4534.98		8907	5890		9821	5195		10247	3885		11762	5745		12442.3	3937.79		11718.4	4530.27			421.048	331.864		3137.44	678.187
		15203.6	2838.38		11165.8	3352.55		11913.3	4176.59		12515	4753.96		12335	4809		12372.7	6233.97		11524.6	4435.16		12507	4593.12		9187	5825		10420	5156		11217	3890		11868	5745		10347.1	3694.32		10348.8	4655.22			2269.64	268.247		2761.92	816.356
		14875.8	3338.42		11145	3080.69		11666.2	3808.66		10632	3705		12669	4759		12813	5765.2		10826	4321		13142.5	5455.96		9462	5662		10044	5145		11213	3930.67		11267	5779		10696.1	4308.95		11613.1	5139.99			1941.84	768.286		2741.06	544.502
		12876.5	3098.1		11533.8	3420.07		11422.2	3649.71		10984	3707		12050	4339		10014	5569		11533.7	4221.45		11088.7	5089.33		8927.28	5900.17		9144.72	5220.86		10487	3926		11365	5811		10398.9	3772.73		10970.3	4895.87			-57.4088	527.962		3129.92	883.882
		14414.2	2684.37		10280.2	3057.28		11859.7	3820.78		12534	3720		12188.5	4349		11977	5968		11756	4142		11017.7	5303.21		9567	5842		9559	5169.67		10190	3909		10807	5732					9904.87	4289.07			1480.28	114.234		1876.32	521.087
		13592.8	3159.86		11001.7	3284.6		11564	3334.83		10840	3703		12756	5402.39		10941.8	5808.95		11401	4151.5		11998	4282		9733.95	6158.79		10073.4	5287.65		10047	3957		12989	5728					11790.9	4271.76			658.856	589.721		2597.79	748.406
		12965	3001		11412.2	3316.56		11160.6	3215.26		11564	3753		12698	4808		10138	5541		11761	4146		12383	4575		9053	5825		9602	5096		10095.2	4040		11605	5832					9677.29	4514.63			31.0477	430.864		3008.26	780.372
		11899	2998		11829.1	3291.41		10501.5	3428.64		12673	3720		12865	4739		11877	5715		10491.6	4331.8		11508.1	5040.43		9518.7	5988.77		11049.3	4839.67		10036	3983.32		12260.5	5786.5					9843.53	4769			-1034.95	427.864		3425.24	755.219
		12455	2882		9928	2989		12762	3866.21		12273	3748		12218	4792		11731.9	5760.8		11083.7	4102.67		12494.1	4729.59		8945	5829		8849.53	5543.03		10609	3973		13027.2	5860.15					11029.7	3981.65			-478.952	311.864		1524.1	452.807
		12389	2957		10674.5	3088.41		11307.7	3649.72		11803	4144.74		12468.5	4824.5		12923.7	5737.41		11786	4031		11573.5	4358.85		9613.23	5902.38		8461.5	5494		10182	3947		11208	5768					10503.7	4564.24			-544.952	386.864		2270.6	552.213
		12957.5	3045.65		10764	3070		10219	3373		13227.2	4560.13		14903	4869.5		11945.8	5693.26		10705	4050		11013.5	5131.43		9237	5844		8492.5	5514.75		10640	3989		11150	5727					9674.99	4575.07			23.5582	475.517		2360.1	533.807
					11278.2	3238.84		10865.3	3490.84		12096.5	4387.75		12715	4762		12024	5315.5		11631.3	4481.38		12000.3	4786.66		11628.9	5889.62		9159	5643		10072	3907		10829	5816.75												2874.34	702.648
					11119	3070		10622.1	3859.32		12643	4385		12589	4937		11267	5712		11771.3	5143.39		10534	4913		9418.97	5983.41		10390	4813		10263	3938		12979	5726												2715.1	533.807
					10622	3077		10190.4	3476.49		11630	4484		11652.9	5074.33		10999	6033		11589.8	4420.28		12130.4	4744.77		9628	5838		10140	4865.97		12137	3909		12058	5728												2218.1	540.807
					10239.4	2949.47		10967.6	3601.84		12467.7	4654.06		12268.5	5116.79		11267	5779		10345.3	4804		12398.4	5413.6		9517	5650		10183.1	4981.66		10761.5	3877		12626	5745												1835.49	413.282
								10253	3618		10792	3976		12298.5	4729		11161.3	5464.69		11593.1	4991.05		11384	4626.07		9669	5879		8466	5500		10424	3927.5		13104	5732
											12322	4161.66		11989	4736		11058	6032		10219.4	4263.05		11359	4622		10029	5686		9197	5481.33		10487	3919		12563.6	5818.09
											12518.9	4453.16		12395	4764		11209	6051		9896.37	4449.37		11636.6	4712.79		10704.5	6400.57		9082	5471		11451	3931		13184	5787
											13441	4400		12394	5513.92		11267.3	5720		10205	4342		11848.6	4389.98		9669	5843		9593.22	4722.55		11410.3	4703.26		11845.1	6177.1
											12197	4499		11386.7	5035.67		11634.9	6415.93		10806.4	5162.8		12446	5146		9500	5662		9775	4470		9759	3654.94		12970.5	5749
											13273.1	4780.24		11892	5154		11484	5812		11044.2	5818.93		11358	4324		9978.5	5676		9792	4468		9995.67	3677.5		13670.1	6336.6
											13483.1	4626.82		12125.4	5296.9		12265.4	6629.39		10106	4734.82		11515.6	4400.83		10526	5660		9678.73	5927.78		10247	3938.67		12143	5899
											13145.3	4253.58		12144.6	5113.21		11733	5558		10909	5471		11497.9	4197.87		9422.06	5990.8		9348	4535		10216.9	3909		12114	5855
											12980	4015		10584.2	4812.76		12682.7	5592		11544	4881		11450.3	4275.42		9278	5642		9349	4697		10252	3883.74		12620	5868
											13415	4431		12188.1	5218.85		12706.8	5747.69		10105.6	4956.49		11616.5	4452.25		9050	5718		10233	4467		10012.4	3932		12903.7	5785.5
											11320	4475		11390	5124		11838	5482		8829.24	4600.91		11477	4138		9455.5	5694		8929.15	5632.06		11895	3661.09		13628.5	5793
											11609	4448		11527	5078		11580	6492		9643	4362		12129.7	4275.19		9472	5657		8588	5517		11146	3832		12304	5740
											11534	4475		12364	4981		11900.4	6265.31		10166.6	4419.58					9435	5854		8451	5480		10758	3515.5		11878	5727
											11374.7	4470.33		11842	5023		12362.5	5522		9869	4742					9421	5672		8209	4509		10969	3475		12358	5779.5
											11967.3	4271.21		11746.9	5019.1		13071	6181								9918	5845		8211	4503		12108	3907		12128.6	5958.95
											12687	3968		12212.3	5818.97		11623.7	6160.87								10802	5891		8543.44	4725.38		11531.2	3513
											11381	4104		10683	4692		14480.3	6980.49								9888	5645		8043	4558		10506	4032.88
											12646.5	5166.57		12045.9	5204.22		12373.6	6220.71								10038.4	5725.62		9786	4520		11474	3481
											13748.6	4784.68		10651	4698		15405	6510								9883.5	5678.5					11460	3762
											12596.5	4018.72		11631	4997											10663	5680					10671	4545
											13353.4	4876.05		12807.6	4905.88											10071	5646					11576	3798
											11246	3955		11346.5	5904.26											9767	5664					10201	3740
											13799.4	4730.39		12200	5723											9028	5660					11133	3795
											11329	4143		12277.9	5600.62											9825.81	6017.06					10920	3738
											12330	4490.67		11930	5335											9579.8	5714.4					11686	3743
											12056	4456		12048	5377											9631	5646					12152	3600
											11888	4129		11579.2	5060.37																	11303	4522
											12656	4497		12310	5352																	10816	3754
											13441	4488		11381	4981																	10841	3759
											12354	4530		11127	4972
											12445.4	4898.99		10645.7	4866.35
											13061.5	4403.23		13198.1	4874.61
											11022	4659
											10165	4065.88
[truncated: 78 more columns]

## Sheet: Absolutes Values Combined
	Untreated Values			BI2536 Values			RO3306 Values			Reversine Values			MLN8237 Values			AZD1152 Values
	BLM	CENmCRMI		BLM	CENmCRMI		BLM	CENmCRMI		BLM	CENmCRMI		BLM	CENmCRMI		BLM	CENmCRMI
	49.1232	575.394		6589.62	3254.12		349.946	635.813		1388.07	637.555		653.096	765.901		635.629	377.818
	0	662.394		6977.41	2155.81		87.4745	741.806		0	1736.43		387.483	607.268		0	197.864
	0	570.394		3539.05	920.754		81.1053	495.421		1182.11	620.434		0	905.515		881.048	279.864
	0	586.394		5751.72	2423.19		2414.27	1037.11		1493.61	600.434		439.239	1590.06		1630.44	654.391
	75.7232	701.594		6360	1703.31		3201.03	1391.43		1251.61	585.934		0	711.601		631.048	264.864
	649.123	583.394		1995.98	1907.03		3485.3	785.128		1557.11	593.434		0	772.268		1391.79	446.335
	1200.12	696.394		1948.48	712.535		1916.05	1290.7		1522.11	600.434		1381.82	1564.6		0	113.864
	0	574.394		1846.48	1935.53		4213.63	1421.12		1592.11	593.434		0	1509.6		184.624	271.174
	0	586.394		2481.92	2053.42		3987.29	911.276		1935.61	585.434		0	850.934		1034.57	192.11
	1540.12	661.394		0	392.535		4013.9	1237.11		0	1808.6		1968.02	1618.09		406.346	454.46
	761.241	800.945		3993.81	1952.53		3060.91	659.789		2038.11	595.434		1500.32	1552.23		1835.47	428.421
	0	585.144		3719.64	1920.2		2263.77	414.388		0	2269.77		0	591.254		421.048	331.864
	533.123	593.394		3476.48	1920.53		2133.17	936.191		0	2574.25		840.227	1754.5		2269.64	268.247
	0	606.394		3176.48	1985.53		4827.39	853.045		594.081	1613.28		0	1071.6		1941.84	768.286
	409.123	579.394		4968.04	2354.59		2632.08	373.985		0	1682.43		0	380.601		0	527.962
	404.123	592.394		2190.48	809.535		1820.34	800.105		4226.11	1474.93		0	407.601		1480.28	114.234
	0	623.394		2221.48	771.535		2456.04	657.626		0	2018.9		0	444.601		658.856	589.721
	0	587.394		2046.48	757.535		6499.93	1347.92		345.695	2145.07		684.945	1220.27		31.0477	430.864
	1640.12	594.394		1734.48	714.535		3321.52	1050.87		0	2052.43		1002.82	1011.6		0	427.864
	583.123	839.894		727.476	771.535		1305.84	855.374		0	1671.34		0	476.342		0	311.864
	542.123	889.394		986.476	738.535		2743.82	999.765		0	1314.25		453.015	1753.26		0	386.864
	294.123	832.894		941.476	789.535		2054.38	484.424		0	1718.44		526.155	1668.75		23.5582	475.517
	353.026	897.587		696.648	863.706		214.448	563.501		0	1769.86		0	1546.6
	700.123	818.394		3425.48	1919.53					0	1630.93		1248.49	2175.92		1894.46	561.717
	957.123	881.394		3441.48	1908.53		1384.59	452.961		0	1574.43		0	1572.6		1033.1	404.807
	1227.27	1185.51		3996.48	1906.53		1047.24	483.845		0	1218.43		0	1531.6		532.1	423.807
	1335.12	802.394		1071.48	727.535		1938.24	420.845		0	1346.65		2808.82	1116.6		1884.29	608.414
	0	798.394		5406.48	2001.53		713.239	1354.85		0	1694.43		574.816	1021.6		1519.1	384.807
	2152.12	819.394					2268.22	1629.07		344.107	1595.43		333.23	1644.13		1562.46	492.492
	2867.12	858.894		1512.35	345.635		2894.77	1057.74		0	1855.17		0	1167.6		2906.59	820.283
	0	865.394		5012.45	1892.38		3844.53	2143.6		0	2960.88		875.483	1910.49		3713.4	892.229
	1357.82	916.102		2196.01	1729.35		1950.11	1596.17		0	2794.68		41.1494	1026.6		1265.2	464.034
	1511.23	878.965		3541.62	1594.46		4135.44	1476.21		0	1413.13		500.866	2658.19		3213.6	1390.31
	1529.12	808.394		2684.66	1436.23		1967.24	1759.85					1304.82	1350.6		2020.84	531.055
	1948.46	856.06		2858.11	1712.67		2118.24	1725.85		1756.94	369.985		1613.82	1843.6		3137.44	678.187
	2532.12	798.394		4275.65	2115.9		2181.88	2100.07		2203.67	337.027		0	1843.6		2761.92	816.356
	3501.25	1004.64		3777.66	1553.23		2271.24	1231.85		2044.01	313.86		2271.82	1831.6		2741.06	544.502
	1066.12	814.394		3370.66	1438.23		2045.57	873.557		562.199	918.981		415.816	2296.6		3129.92	883.882
	1026.12	804.394		3776.66	1481.23		913.189	1206.92		0	772.36		1615.38	1868.08		1876.32	521.087
	1646.62	740.394		2725.79	1500.11		2268.41	1447.98		1115.37	1588.5		468.69	697.748		2597.79	748.406
	1608.37	728.894		2223.66	1452.23		2393.24	1119.85		270.665	1349.3		2022.44	1980.76		3008.26	780.372
	297.123	540.394		4165.92	1667.77		3597.47	1839.19		0	949.836		2412.82	1539.6		3425.24	755.219
				3226.11	1515.18		2959.69	556.604		2331.13	712.132		0	598.468		1524.1	452.807
	0	333.702		2296.66	1511.23		1863.27	1663.31		1346.59	926.443		1466.82	2366.6		2270.6	552.213
	0	358.402		1356.66	1440.23		1309.24	1406.85		0	802.36		0	465.601		2360.1	533.807
	0	445.702		1642.66	1444.23		1784.9	1039.92		1216.69	1019.46		1709.82	2333.6		2874.34	702.648
	0	1267.7		2952.66	1409.23		1420.24	1011.85		570.216	936.198		0	522.887		2715.1	533.807
	1427.99	741.477		2864.66	1413.23		1251.14	719.474		141.527	652.403		3841.82	1107.6		2218.1	540.807
	0	921.536		2153.34	1641.21		1798.24	1041.85		124.005	794.36		1098.32	1289.54		1835.49	413.282
	313.942	813.373		4533.66	1444.23					24.2015	479.467
	0	1057.14		2165.2	1604.67		3529.4	706.732		137.005	569.36		0	1183.57		1615.71	716.933
	0	765.702		238.043	1521.02		3514.65	858.16		65.0212	603.892		0	913.483		2351.66	1062.41
	839.284	777.702		681.662	1458.23		4124.2	915.305		841.936	791.178		1540.58	2244.87		3187.29	904.762
	0	1065.7		646.662	1458.23		1771.04	558.723		0	438.36		1083.07	2343.2		3427.86	644.212
	0	1101.7		0	86.2318		1250.41	498.613		1141.01	414.36		0	1036.83		2629.12	1017.86
	2243.88	895.902		0	74.8984		3388.26	865.172		911.005	414.36		0	1417.54		2864.15	507.031
	2028.28	1086.7		0	324.18		802.868	671.157		0	508.36		0	935.991		4091.41	545.911
	2315.28	1086.7		0	152.232		5701.52	1011.15		1458.96	1512.01		0	779.155		2321.07	529.312
	2570.12	1767.25		3305.66	1494.03		1438.9	719.173		136.574	687.817		0	734.155		4302.75	762.33
	0	129.702		133.662	105.232		3276.38	1026.15		386.005	759.36		0	695.155		2137.74	868
	0	283.702					5279.12	1265.42		0	547.767		0	824.155		3307.74	784
	1314.15	875.722		3064.19	386.012		2732.87	762.431		0	619.36		0	804.155		3641.33	1498.2
	0	232.702		3588.01	766.081		3664.11	692.492		0	538.36		0	822.655		3700	1358.59
	599.284	838.702		2369.01	758.581		2341.49	593.582		0	638.36		409.007	1536.23		3452.89	990.664
	2582.28	508.702		3327.84	806.915		2503.82	668.441		0	922.36		1998.72	780.31		3208.92	831.714
	2005.3	538.248		2619.38	804.581		2914.46	1043.83		1010.92	1133.42		2085.29	1117.1		3646.45	1002.78
	2811.01	2076.56		3922.01	798.081		3328.32	876.869		0	623.36		1275.56	717.155		3350.72	516.83
	1858.41	1053.41		3586.45	1036.15		3215.02	608.868		1931.01	1250.36		772.494	1342.38		2947.31	397.258
	2194.28	568.702		3825.01	887.081		3246.04	987.824		0	483.36		0	1576.91		2288.24	610.642
	1695.28	950.702		3337.89	950.601		2472.39	652.55		427.005	1243.36		1400.56	698.155		4548.75	1048.21
	1392.8	1244.92		3595.54	1178.64		2637.78	804.081		0	486.36		0	2236.23		3094.41	831.72
	2898.85	904.436		2644.21	996.509		3051.53	472.882		4.39635	949.186		301.734	1433.74		2005.74	555
	0	1487.75		2169.12	785.748		3812.21	1241.53		817.785	968.97		0	2463.64		2652.06	672.835
				2237.01	771.081		1718.39	318.072		0	839.36		1638.62	783.933		2408.87	1041.32
	0	85.514		1848.01	763.081		854.698	327.639		0	824.36		1083.56	675.155		1977.16	658.486
	0	220.103		1448.01	803.081		2024.35	754.302		0	842.86		1692.56	741.155		2754.35	783.844
	0	729.764		1913.01	1381.08		0	417.707		0	869.693		0	963.155		2039.74	800
	0	2175.15		4089.36	1715.85		1749.5	411.405		0	809.36		0	1051.16
	3273.22	1329.45		2575.84	772.915					576.005	493.36		1487.56	718.822		2994.48	1505.58
	3878.23	1094.76		4006.79	975.917		307.192	887.232		796.612	562.074		1932.56	664.155		1742.92	1083.01
	0	1595.56		2339.01	836.248		1197.51	1079.85		1776.63	560.943		0	1022.16		884.338	699.669
	3232.23	797.764		2211.77	885.538		356.194	329.781					0	1047.16		1988.34	733.669
	0	1285.98		1873.01	749.081		623.268	1301.86		0	860.51		1734.56	709.155		1347.34	699.669
	0	1156.92		988.009	755.081		969.814	835.182		168.104	490.922		91.5604	1826.16		1853.55	787.986
	3382.56	598.764		1730.01	749.081		2383.62	1153.05		659.98	1599.81		1649.56	1817.16		1137.34	716.169
	2807.73	614.764		3441.01	806.081		1671.13	2219.17		0	1077.14		0	1742.73		1296.34	923.669
	0	929.764		2392.01	772.081		3113.76	1727.48		1695.16	600.804		0	1378.16		2006.34	710.669
	0	1094.76		1869.3	966.705		3165.11	1812.37		3425.79	688.971					2270.34	774.669
	2761.23	533.764		3305.51	756.831		1917.58	1672.09		0	858.804		876.862	767.353		1990.34	903.669
	1848.82	418.084		1438.01	779.081		523.657	831.994		0	1565.05		0	1123.16		2563.34	719.669
	2501.86	854.128		4965.01	746.081		1801.23	1508.44		731.163	1341.8		771.451	659.638		2882.3	1750.63
	0	1079.76		4354.01	765.081		2013.16	1624.16		299.756	1936.43		0	853.138		999.338	701.669
	0	1091.47		3382.01	747.081		914.221	1621.69		641.343	1705.32		0	637.138		1351.34	703.669
	0	585.716		4260.68	1549.75		2634.3	2246.36		143.466	1914.55		0	553.07		2901.34	716.669
	0	651.764		650.009	686.081		2144.66	2069.55		357.343	2057.37		0	863.138		1207.34	699.669
	190.959	1139.84		2394.01	984.081		2961.11	3376.66		2059.16	1742.8		0	457.138		1931.34	749.669
	0	412.764		3700.01	1215.08		3786.29	1841.53		159.085	1092.51		0	443.804		3040.34	716.669
	938.729	936.264		1219.01	793.081		3169.64	2032.39		617.363	260.471		0	466.638		2640.34	744.669
	0	882.764		1461.01	697.581		1655.22	711.778		1168.16	440.804		0	1434.62		2170.33	1141.41
	0	1098.76		3574.57	1091.38		3999.79	2842		1179.11	356.508		569.204	727.07		3594.52	1556.8
	0	1131.34		1714.01	816.081		2090.11	1540.78		696.477	1265.45		956.897	640.544		2463.84	1384.42
	0	1212.76		2936.42	1266.57		3034.66	2531.41		662.163	1062.8		622.61	1683.95		3010.34	1381.67
	0	1074.76		1454.16	740.903		2332.83	1737.4		686.824	1495.73		1724.43	1251.27		1997.34	1480.67
	0	1237.76		1863.01	1030.08		1270.19	1059.53		689.342	1579.42		612.451	911.138		2835.05	1650.73
	829.871	1025.03		2731.01	735.081		2313.52	1435.29		1007.63	940.017		0	824.73		1159.34	972.669
	0	1253.43		2146.01	1227.94		989.7	634.107		1055.73	710.369		432.451	466.138		2689.3	1158.33
	0	1232.06		1288.01	711.081		311.157	434.411		595.227	3003.95		0	2133.83		2886.25	1449.83
	0	1033.76					667.157	434.411		1482.66	124.804		95.433	1759.9		3808.34	1396.67
	0	120.014		2776.42	604.205		844.157	482.411		1556.16	195.804		1591.45	567.138		2564.34	1495.67
	0	1195.76		4788.42	473.205		1304.16	491.411		418.103	1161.22		2038.45	1171.14		3640.43	1776.91
	0	1126.76		3609.42	538.205		305.657	458.911		0	640.717		859.451	164.138		3850.46	1623.49
	0	729.201		569.313	208.76		1465.16	416.411					1623.45	167.138		3512.64	1250.25
	0	1259.26		2975.4	527.576		207.157	444.411		988.158	1159.23		301.951	228.638		3347.34	1011.67
	0	936.764		3811.42	683.205		2079.16	415.411		595.828	913.072		386.326	1322.14		3782.34	1427.67
	148.229	1116.76		3741.42	530.205		243.177	570.968		975.495	930.405		801.451	468.138		1687.34	1471.67
	0	987.764		3035.32	473.511		1444.82	1954.24		679.828	904.072		944.661	235.728		1976.34	1444.67
	0	1171.76		1774.42	374.538		1983.31	2128.93		409.328	923.822		1188.45	156.138		1901.34	1471.67
				3960.42	610.205		1878.39	2107.7		898.828	895.072		1406.43	575.695		1742	1467
	0	923.574		4237.42	650.205		2569.45	2698.32		699.828	910.072		1188.45	202.138		2334.65	1267.88
	0	927.245		4320.42	403.205		926.772	2050.41		0	829.072		1753.25	537.538		3054.34	964.669
	0	622.523		3627.09	574.338		1827.16	1948.41		0	1182.54		1632.45	170.138		1748.34	1100.67
	0	603.523		2490.35	400.755		3767.46	2062.77		247.181	1761.71		1771.45	515.138		3013.87	2163.23
	1.16002	1117.04		2245.42	563.205		3299.99	2123.87		363.786	1353.57		2428.45	1210.64		4115.92	1781.35
	471.787	1162.8		2765.12	457.612		2058.66	1620.66		5700.83	1096.07		1259.45	178.638		2963.84	1015.39
	370.531	1389.66		3006.42	443.205		2432.04	2211.13		2792.58	1136.07		0	3032.06		3720.77	1872.72
	485.71	1075.52		2441.54	444.166		2124.66	1292.37		0	965.694		1273.45	531.638		1613.34	951.669
	50.7096	428.523		2145.59	357.977					2148.25	1327.28		0	1116.14		4166.73	1727.06
	0	377.523		170.924	151.705		793.866	593.709		1867.79	865.361		1242.45	527.138		1696.34	1139.67
	371.174	468.88		2341.11	413.729		0	393.241		718.874	1796.62		786.451	485.138		2697.34	1487.34
	0	742.852		696.174	127.455		0	317.28		0	798.072		0	1474.51		2423.34	1452.67
	735.71	880.523		2456.07	423.605		0	289.78		1055.83	659.072		0	1090.14		2255.34	1125.67
	494.145	1094.23		708.924	209.455		378.394	286.28		1240.38	918.183					3023.34	1493.67
	0	1483.73		212.424	99.7047		960.677	1259.03		0	736.711		0	249.108		3808.34	1484.67
	0	864.523		3670.42	653.205		613.212	604.722		691.547	777.151		0	431.304		2721.34	1526.67
	0	1086.35		3013.92	479.205		3368.14	2130.43		67.8281	822.072		0	350.351		2812.77	1895.65
	0	1484.94		1355.42	310.205		1781.16	899.876		0	647.614		0	248.808		3428.88	1399.89
	1746.71	610.523		4348.76	664.871		329.085	585.574		322.828	795.072		0	345.308		1389.34	1655.67
	139.027	861.148		2940.82	475.496		1525.3	1009.51		201.828	819.072		0	294.308		532.312	1062.55
	0	1388.57		4810.42	688.705		2698.71	578.298		436.891	1366.02		0	406.308
	748.105	674.107		4555.86	719.77		2206.01	1335.67		752.828	1150.8		0	593.853		1027.32	722.286
	1434.71	558.023		3209.16	554.839		2828.08	969.648		348.672	1246.17		0	412.308		174.146	699.174
	913.71	1193.52		5331.76	847.538		3852.79	2737.9		726.208	964.338		0	415.308		2710.32	600.286
	0	1154.52		4517.38	759.487		3015.76	1461.64		234.578	991.822		0	511.479		692.925	770.793
	1157.76	369.898		6684.42	994.205		934.816	518.999		904.161	1007.41		0	428.308		1641.94	740.963
	0	1193.52		4818.57	878.411		1606.89	583.125		2408.83	990.072		0	412.308		494.234	193.515
	0	894.877		7681.92	1331.45		1127.76	925.339		899.902	1304.38		0	431.308		1658.13	471.325
				7740.42	1333.2		2680.5	1226.11		897.419	736.708		2610.35	375.308		1657.32	527.286
	516.92	169.239		7459.05	1283.08		2221.19	881.635		918.495	778.072		1611.08	457.085		2389.64	739.144
	0	4.86623		5859.24	963.907		383.733	509.07		2392.23	842.856		0	441.641		1335.88	631.883
	0	928.125		6215.95	983.79		1794.2	840.719		1197.76	946.575		0	468.975		63.3198	733.286
	1877.8	44.8662								1315.83	727.072		0	444.308		1755.32	698.286
				4508.76	1099.37		1521.44	1181.85		1201.83	715.072		617.348	404.308		1075.32	611.286
				3504.35	1075.68		1620.28	1180.51		1796.54	989.49		1115.16	1277.67		1409.32	561.286
	158.802	717.866		3006.35	987.616		47.2649	937.775					3749.35	255.308		790.32	141.286
	0	761.889		2597.35	991.616		2372.85	752.558		98.0673	975.116		979.348	350.308		928.82	151.286
	190.233	735.935		4039.35	950.616		1868.11	1962.48		0	1182.54		170.348	316.308		1496.28	1204.68
	0	774.866		1357.85	878.116		1538.73	1308.5		0	796.536		0	280.308		1438.32	610.286
	0	714.919		3599.32	1372.73		1152.3	967.741		0	815.263		232.148	290.908		1605.32	541.286
	0	773.366		631.1	901.116		3469.1	1057.9		0	871.052		1726.69	964.257		958.32	594.286
	0	644.866		3395.35	952.616		297.255	1305.12		0	1444.88		1033.35	685.308		1208.82	626.786
	0	647.866		3708.92	1092.9		1018.77	1433.05		0	1364.54		2087.35	692.308		3643.32	671.786
	2021.44	2187.94		4311.35	979.616		400.255	1244.12		379.339	1371.54		1927.35	749.308		1455.32	564.286
	3201.65	803.984		2989.35	954.616		0	528.574		0	1470.23		2099.35	668.308		1329.32	739.286
	1499.72	1789.53		717.35	855.616		550.283	990.116		318.11	1650.36		2405.35	760.308		393.241	876.62
	1282.8	1771.87		2904.95	1025.22		30.2546	1235.12		0	1346.54		1728.35	671.308		1008.83	919.076
	1404.14	1730.53		3104.35	948.616		2223.21	843.544		0	1347.54		1003.47	543.739		1038.82	531.286
	346.802	1783.87		783.35	977.616		3246.1	1097.55		36.0055	941.566		480.348	674.308		729.32	538.286
	1694.43	1581.2		639.35	941.616		0	562.116		0	1348.54		644.488	2067.66		1135.32	566.286
	3336.51	770.845		2174.57	1212.73		171.887	639.381		555.589	1537.01		1481.35	671.308		1134.28	1316.21
				2259.85	979.116		2215.25	766.116		723.139	1480.14		247.348	333.308		126.986	837.953
	2175.14	1380.53		3488.35	1057.62		1344.81	1273.19		893.28	1838.37		53.3477	1673.31		632.32	956.286
	5127.8	494.866		3171.35	979.616		3025.53	1902.34		1285.94	1397.79		594.148	1752.91		865.732	1099.18
	1911.8	778.866		2192.95	844.84		211.692	484.491		304.827	1554.1		260.348	1767.31		884.969	915.5
	692.302	814.366		1143.35	951.616		102.255	442.116		845.883	1513.74		2080.73	1365.2		0	615.048
	220.814	1089.35		3666.35	969.616		638.255	1142.12		1003.34	1184.54		144.348	1809.31		928.458	1021.14
	556.802	934.866		2332.79	1147.51		2719.62	1626.86		830.309	1206.54		1675.35	926.308		130.32	926.286
	981.802	1381.87		4347.35	1058.62		1875.36	1525.24		71.3854	1376.35		0	927.908		267.32	880.286
	902.802	1278.87		3321.56	1035.2		1204.25	1485.12		49.3389	1115.54		0	956.808		1104.32	783.286
	0	776.866		2026.35	878.616		2103.88	2193.01		0	1120.54		1234.48	1294.45		582.32	825.286
	1386.64	878.133		3400.35	1023.62		2264.48	1085.41		0	1161.54		987.348	928.308		487.22	821.386
	0	788.866		3136.35	979.616		2840.46	1285.81		359.183	1290.1		0	982.308		952.657	1621.25
	802.802	1240.87		590.016	882.616		1482.16	1275.85		104.339	1138.54		207.598	687.665		0	494.286
	0	777.866		1225.35	630.616					122.672	1165.54		0	927.308		786.176	1006.51
	0	939.174		473.412	929.116		2174.3	1063.47		740.097	1200.23		1890.47	1657.8		0	500.286
	449.802	776.866		1713.11	1005.12		1986	1076.27		736.839	1239.04		1011.35	1329.31		371.32	799.286
				330.55	935.016		2496	1095.27		615.839	1135.54		177.348	916.308		1547.88	708.169
	195.124	489.882		31.3495	857.116		3557.03	1439.24		281.339	1146.54		377.348	945.308		86.7904	1706.55
	1168.1	665.5		4886.74	1111.25		2157.67	1089.93		823.028	1328.78		254.681	944.308		940.32	1525.29
	42.1238	484.882		2890.02	1084.95		3409.63	730.884		1418.34	254.536		487.696	1075.43		1018.23	1402.91
	405.124	459.882		1945.6	1142.21		2634	1212.27		2171.34	245.036					670.32	1137.29
	1357.71	1439.25		3911.99	1006.62		4274.45	1574.12		790.501	1558.92		13.4708	529.044		788.32	1179.29
	1401.61	2138.57		6881.41	1110.3		4110	560.268		914.539	248.936		1064.28	1163.54		319.521	862.653
	311.851	1243.7					2744	1092.27		1000.84	226.536		291.624	420.587		1050.32	1154.29
	1123.94	2929.82		1088.56	372.828		3276	1147.27		1632.34	211.536		28.6974	553.052		121.32	783.286
	0	2339.42		1106.23	361.494		3175.35	1017.47		2393.02	909.578		0	473.587		0	774.286
	284.317	2650.23		793.23	569.494		3767.6	1068.47		1343.34	207.536		0	424.587		0	668.633
	0	2518.74		930.697	629.428		3552.45	1656.99		951.339	1426.54		0	501.587		1938.38	676.899
	0	2526.35		2892.33	644.344		1972.67	1301.6		1360.34	1447.54		0	351.587
	0	2089.88		2085.23	599.494		6157.3	3115.11		1234.34	1382.54		435.906	1095.84		1928.18	726.485
	0	1638.89		2025	687.175		3929.39	1357.8		874.879	1553.64		0	397.525		3473.5	520.12
	0	1123.89		2010.95	590.193		4068.79	1785.94		3241.97	956.228		0	486.587		1692.64	1382.64
	0	2536.4		2745.42	771.445		3182.11	1529.84		1088.34	1425.54		282.047	610.242		1323.95	783.18
	0	2382.25		150.23	569.494		3123	1366.27		2486.16	1728.55		938.142	729.417		2314.52	466.499
	0	1298.88		953.23	372.494		4558.19	2329.61		122.339	1318.54		0	446.587		1160.66	789.833
	0	621.882		1545.23	580.494		2394.17	1204.32		641.531	1368.77		0	491.587		0	633.105
	0	932.979		2270.2	935.885		3801.36	1050.14		4049.67	212.869		0	1002.59		454.339	1057.28
	0	1655.78		1209.23	541.994		3266	1274.27					542.315	805.736		854	596.62
	0	1590.01		1140.23	539.494		4745.39	1369.61		0	805.374		147.714	511.741		1278.5	627.12
	0	2041.82		2077.01	754.588		3980.79	1136.99		0	1003.33		0	437.587		3241.5	527.12
	0	1388.88		682.23	484.494		4605.56	988.995		600.985	596.538		1067.47	786.246		0	544.911
	0	1422.88		1647.23	413.494					0	872.132		659.483	655.087		1276.22	1464.09
	1472.12	602.882		1842.23	398.494		1259.08	750.56		0	836.132		0	311.587		1716.5	995.32
	378.454	1659.23		920.23	539.494		1492.46	581.452		0	804.132		904.983	934.087		0	799.12
	1475.38	808.01		1457.23	391.494		1397.8	561.115		171.772	1014.23		0	693.587		880.5	1198.12
	3031.17	746.882		1703.23	367.494		1939.67	844.615		0	823.632		504.316	838.944		0	1039.07
	182.218	828.788		1793.23	365.494		0	570.115		0	836.132		350.483	629.587		0	771.12
				1635.23	582.494		48.7961	583.115		0	815.132		730.483	633.587		780.5	945.12
	0	1042.03		667.23	643.494		0	619.515		197.463	812.695		0	781.777		635.358	990.916
	0	746.557		1254.23	596.494		2733.69	1882.13		1183.31	586.721		244.483	674.587		1827.16	967.53
	0	1266.13		2489.23	656.217		2233.96	1315.64		885.33	1019.9		0	363.587		849.302	923.385
	846.388	518.774		1544.23	529.494		217.582	598.865		970.287	524.132		216.483	784.587		927.5	545.62
	0	1542.89		1650.23	537.494		1287.57	1371.05		1519.79	486.132		0	934.587		170.5	942.12
	1112.63	802.018		3656.12	985.9		1381.11	1189.16		1124.38	960.202		636.483	425.587		0	1263.12
	1768.11	953.188		4709.35	1565.5		27.2961	882.532		2680.79	832.132		1825.31	541.14		170.5	1009.12
	459.971	1005.89		650.23	361.494		15.4896	631.454		1044.79	757.132		14.2368	1200.12		64.8122	694.808
	1451.33	1363.32		1098.23	565.994		1808.8	1049.12		2361.79	864.132					0	1262.12
	909.324	1192.39		1917.7	586.156		1194.17	1012.12		2201.18	618.957		1780.07	1707.6		112.5	1281.12
	878.955	1446.22		909.23	552.494		0	770.115		606.787	777.132		1958.78	1090.58		170.834	950.12
	3221.56	1235.66		1403.23	347.494		287.141	655.477		920.27	722.583		3052.4	1087.45		538.381	1646.05
	1777.28	1610.97		1416.67	411.883		1118.9	593.115		1273.79	817.132		1650.36	1242.96		387.5	1042.12
	3273.56	1949.27		2546.83	869.075		1765.8	488.115		2076.27	1002.33		1627.9	1002.45		1168.93	1859.51
	34.5864	1557.64		3855.84	1148.76		1828.51	757.865		878.787	719.132		414.901	1195.45		636.5	788.12
	1760.74	1275.76		1787.83	395.494		951.463	473.448		1475.29	843.624		0	1033.45		1586.17	822.12
	0	1037.17		647.23	836.494		385.538	606.373		0	901.132		0	1258.29		1610.35	977.812
	0	1289.96		1151.23	366.494		3955.21	2335.31		1358.79	844.132		279.901	1048.45		741.5	712.12
	0	683.014		1603.23	492.494		94.7961	533.115		42.7866	878.132		741.901	1018.45		483.5	1722.12
				1013.23	348.494		1590.37	544.02		1401.79	922.132		0	1048.83		803.907	1495.43
	0	656.78		2320.88	615.347		1953.38	1053.44		1467.79	811.132		0	1314.28		1266	752.12
	1812.46	646.78		1024.23	431.494		1960.03	1721.32		1178.95	1041.66		0	1084.45		1974.5	1411.12
	1070.54	623.613		2246.23	433.994		0	563.115		1034.42	1200.95		0	1151.25		527.171	1390.99
	1802.21	644.88		1119.11	849.119		0	685.615		2453.79	944.132		704.673	1307.71		3383.78	2210.61
	1015.88	648.28		1242.03	501.177		396.796	483.115		1158.79	520.132		626.401	1142.95		1277.15	1450.83
	1867.71	599.28		1815.23	619.494		796.146	627.615		1893.33	630.823		0	1141.35		4308.5	1740.12
	0	832.634		1267.23	440.994		2217.27	1136.07		354.787	904.132		2453.44	1108.74
	0	617.373		2154.23	506.494		2594.8	1428.12		318.787	922.132		874.581	1154.82		1897.09	1968.94
	0	406.78		1317.51	846.161		4286.8	1426.12		2497.92	880.967		2769.81	1091.91		1291.38	2116.65
	0	656.68		2340.23	568.494		2050.3	1438.87		1650.34	1100.67		8365.9	887.452		390.728	1717.95
	0	564.734		2079.41	639.383		2460.39	540.485		952.787	929.132		2817.9	876.452		2237.51	1617.39
	0	723.564		1309.23	628.494					1036.79	878.132		0	1449.33		1293.14	1568.26
	0	483.28		1391.23	622.494		806.793	208.957		1676.79	975.132		753.901	1764.45		0	1545.92
	457.21	193.28		1027.76	276.411		2246.01	268.021		1096.8	673.148		538.901	1743.45		1939.53	1649.09
	502.21	209.53		992.23	151.494		1557.8	387.253		219.787	557.132		207.68	2923.11		1775.12	2409
	0	682.98		1443.3	192.262		1196.48	267.624					0	1008.63		1091.64	1940.26
	1089.71	244.28					566.793	205.957		0	528.944					1177.06	1112.14
	289.71	196.28		9964.63	3230.29		1640.76	341.522		769.384	690.378		1412.64	1081.41		938.713	1877.08
	0	715.82		6832.95	3997.03		1451.79	211.957		0	1120.79		2160.69	740.542		2077.9	2196.93
	0	444.28		3818.45	2390.98		2910.79	623.957		1335.41	800.215		333.688	809.042		2273.23	1209.41
	484.71	209.78		3396.08	2769.45		501.793	222.957		154.795	1032.12		750.688	779.542		1574.64	1095.26
	214.71	216.28		1887.78	2220.05		5219.66	697.035		0	1905.73		602.688	725.542		2282.3	995.703
	0	703.647		0	1937.29		2359.51	301.367		741.525	915.353		660.688	728.542		2504.64	916.257
	183.21	458.613		0	1876.98		2236.79	619.957		999.787	928.942		585.253	883.895		2149.64	925.757
	132.71	183.78		160.57	2001.22		1675.79	296.957		630.79	789.866		982.834	728.346		2509.64	920.257
	1156.71	203.78		0	1668.98		1981.54	303.457		860.714	610.976		0	1047.86		1240.24	1106.06
	167.544	617.28		373.2	1770.98		3479.66	585.178		1036.21	861.976		362.577	560.312		1832.32	876.93
	484.71	208.78		4554.06	3949.14		3056.29	618.457		0	663.584		388.688	547.542		2534.64	805.257
	0	186.946		8052.96	3353.29		3072.79	590.957		3314.4	702.428		1839.69	705.542		1453.64	824.257
	317.21	169.78		7593.34	3617.43		1498.79	325.457		0	569.123		264.531	473.012		2379.91	1255.64
	185.608	317.945		2798.98	2682.09		3015.79	608.29		1651.04	1157.21		0	862.075		2519.92	1917.65
	0	690.28		5897.62	2905.37		1316.79	260.957		1438.01	928.676		1246.69	471.542		2338.4	1194.54
	0	176.946		4076.2	2734.98		581.793	218.957		1039.97	1616.51		4640.37	1476.01		1093.91	1578.26
	54.7103	204.28		4249.87	2639.98		1960.79	614.957		154.214	1235.48		94.6879	454.542		2341.74	1765.31
	0	927.78		5784.27	3200.39		2076.82	452.77		595.999	1230.75		0	384.542		968.053	1037.3
	0	866.613		6891.71	3032.59		0	332.957		901.214	1068.48		2144.87	841.457		645.011	1223.62
	358.826	1190.42		6458.9	2893.3		1318.79	225.957		1398.14	754.085		254.688	271.542		953.643	1116.26
	957.911	824.999					2905.79	395.957		1026.94	1208.43		360.688	319.542		1555	1937.06
	597.21	619.28		6127.96	790.403		2807.97	323.432		1597.21	897.142		537.505	616.592		1792.85	2593.19
	364.21	615.28		3421.22	681.383		2283.79	421.957					0	232.542		854.618	1509.08
	835.21	605.78		4729.61	920.845		1315.79	357.957		201.204	794.946		0	354.542		1657.64	2245.26
	841.71	634.28		3198.8	902.406		2055.79	383.957		743.604	735.946		0	748.042		2292.64	1655.26
	1127.21	628.28		3225.26	705.655		1184.79	350.957		1799.26	830.045		0	764.542		854.293	1730.75
	1158.92	635.101		2490.28	780.716		777.043	374.707		2041.22	897.53		2227.69	315.542		0	1375.17
	415.21	615.28		3295.22	705.383		1269.79	331.957		1544.76	1580.28		986.885	1268.46		391.643	1136.26
	800.71	626.28		1974.22	677.383		1681.59	283.419		2238.95	708.575		1225.59	486.994		915.283	1193.84
	1392.54	615.946		2372.26	871.774		1863.92	454.359		1792.6	322.946		64.9532	967.406		617.643	1516.26
	0	780.28		1464.72	655.383		1988.79	285.957		0	1170.06		792.688	275.542
	0	471.107		3658.22	728.883		2599.1	361.93		3140.6	2379.95		664.063	309.167		2622.99	1223.51
				5125.22	728.383		1762.79	289.957		2188.6	2352.95		104.688	512.542		2389.88	1273.51
	2854.76	754.419		1577.09	749.174		236.062	182.938		1629.03	1069.01		63.9379	626.042		1681.46	1514.97
	0	594.95		3415.22	718.083		1795.79	291.957		341.715	813.835		0	617.185		2922.99	1278.51
	1310.04	554.476		974.218	710.383		1196.79	210.957		2301.6	764.946		0	2001.55		2934.99	1270.51
	721.12	656.656		2427.22	677.383		4303.02	818.658		0	725.946		755.688	1377.54		2598.75	327.232
	739.424	526.784		2763.22	651.383		1089.02	153.111		0	680.113		2042.69	1347.54		3213.81	1533.44
	851.258	573.95		4978	813.003		725.793	102.957		134.747	805.589		397.62	869.069		326.954	864.48
	620.336	652.356		1489.39	772.744		125.793	102.957		2322.6	717.946		0	1439.54		0	759.512
	945.904	663.232		1965.22	646.383		2083.78	272.295		0	729.946		0	1995.55		1464.99	278.512
	2761.35	1136.51		1929.22	682.383		2220.71	290.457		0	626.946		1129.53	1083.24		0	651.325
	2210.41	1637.83		1969.68	712.285		1227.71	238.304		0	635.946		450.176	1529.54		650.498	663.489
	3472.31	1085.15		318.218	659.383		1138.46	174.29		0	800.946		1202.49	836.423		1445.95	721.631
	3812.85	541.868		3335.86	916.144		1226.29	188.957		0	647.946		1229.69	784.542		2081.53	1584.47
	2654.42	867.284		931.218	674.133		1409.79	239.957		0	1008.86		117.688	768.542		27.6533	1217.85
	1173.77	1021.8		1419.22	677.883		1706.79	258.957		656.745	1035.68		960.688	517.542		0	1431.73
	2047.24	1072.38		1559.22	648.383		882.222	224.401		1867.4	1039.81					936.987	410.512
	2320.85	1302.28		2437.22	674.383					1221.3	927.496		242.918	1586.52		1321.99	703.512
	487.511	736.028		3116.02	916.053		954.821	476.044		2560.96	1104.39		1282.89	3075.92		447.077	1168.94
	1356.35	965.135		3637.18	941.148		179.527	393.187		0	630.946		193.916	1640.32		1433.04	858.102
	3718.01	1645.66		3127.57	713.5		1354.53	373.187		2352.84	894.411		1304.03	3208.75		512.441	487.361
	1008.13	1095.62		8865.49	1245.72		694.527	379.187		2182.6	833.946		502.744	3149.44		0	1259.94
	1859.44	823.229		4395.42	773.072		3080.21	652.158		1522.6	800.946		2697.98	1773.54		939.27	915.169
	1923.74	1196.63		1914.22	700.633		3208.71	1194.13		0	677.724		1227.04	1599.83		0	1041.51
	722.169	583.61		2752.87	928.45		1758.53	261.687		436.604	795.946		1616.12	2489.86		1069.38	873.287
	203.924	298.284		7823.2	1440.33		2087.74	814.769		1455.6	818.946		3096.44	2125.98		1337.34	1542.11
	933.18	429.986		3788.56	408.931		1255.05	341.871		367.563	867.28		3273.11	2083.43		322.987	754.58
	0	727.189		6807.8	1376.78		2267.44	538.291		2244.6	824.946		2878.87	1498.19		297.987	750.512
	176.258	833.391		5656.72	1148.54		2423.07	688.242		2535.04	1211.63		3041.91	2528.47		575.558	841.298
				6497.96	1201.87		1002.78	328.187		2106.6	784.946		2151.11	2043.43		787.605	518.494
	101.682	1502.73		994.108	413.213		1252.85	426.158		3040.6	803.946		3512.11	2024.43		1384.99	1274.51
	1702.38	1727.25		6506.88	1164.19		2294.13	716.512		1087.07	1009.3		857.802	2128.24		296.987	452.512
	281.827	1084.99		8170.67	1183.14		1721.24	352.414		2553.6	783.946		1368.11	2034.43		454.606	529.346
	862.497	811.088		3403.16	468.844		5316.19	1513.02		0	924.732		897.11	2105.43		436.884	326.384
	435.651	1371.87		7517	1141.05		2208.4	352.41		2016.68	1135.15		565.11	2042.43		389.32	403.929
	745.485	2787.48					1060.53	276.187		2404.23	1300.82		585.11	1885.43		555.507	580.762
	0	2420.35		21.7912	431.502		2054.2	446.539		0	937.901		756.11	1797.43		415.987	266.512
	1110.63	1562.03		101.155	402.866		3016.98	490.543		0	796.546		1808.96	1829.38		1068.67	403.7
	1527.38	2503.68		153.155	413.866		947.527	418.187					1382.16	2245.95
	1081.31	1839.29		1414.65	524.853		3637.14	815.174		0	946.131		2220.11	1343.43		357.465	1390.54
	90.9103	1536.03		0	616.348		2521.74	762.31		262.981	770.712		2159.11	1210.43		24.8984	1267.34
	1804.64	772.016		0	642.866		2700.19	339.81		0	869.712		2465.11	1438.43		2149.9	74.3359
	0	3098.93		0	670.679		2644.39	602.597		2058.98	866.712		3450.36	1718.88		1227.18	309.431
	579.697	1164.73		3999.46	1591.74		3167.53	593.187		2868.65	894.337		3030.11	1576.43		0	1442.24
	1807.66	727.972		1574.88	1563.58		4041.89	1160.1		588.981	629.712		1606.78	1274.1		1025.9	121.336
	2595.01	1144.12		2489.73	1224.19		3591.59	575.987		1332.48	648.212		1575.43	1934.48		582.898	75.3359
	63.7301	957.436		3636.99	1380.87		1258.76	532.753		3301.98	784.712		0	2047.41		78.3376	1431.49
	0	789.815		1587.15	1094.87		1668.33	476.507		0	647.712		921.517	1845.79		0	1342
	0	1687.63		1241.58	1541.82		757.587	344.987		0	2184.14		1056.61	1669.93		0	1264.34
	868.404	1575.97		1962.95	1519.43		901.527	233.187		3606.98	1712.71		1753.11	1298.43		448.398	1114.34
	0	961.021		5223.08	2748.36		2466.09	955.523		6445.98	1669.71		2089.19	1492.13		0	1317.34
	326.985	1261.49		2205.77	1129.45		3089.66	945.144		0	930.283		1264.11	1571.43		0	1252.34
				4224.45	1846.66		672.527	791.687		0	1802.65		1854.11	1305.43		100.898	1089.34
	1838.95	1253.03		6213.15	1328.87					2175.98	1603.71		1496.11	1603.93		0	1327.5
	2872.85	1309.66		3198.97	1266.35		3764.63	1087.46		1658.5	2014.8		75.1101	1900.43		205.898	1269.34
	89.2691	1188.93		2824.55	1669.39		3607.41	1336.16		1989.98	1743.71		2525.11	1583.43		372.852	1586.13
	821.528	983.06		1736.15	1033.87		2090.34	916.342		0	935.481		61.3292	1827.1		0	1252.34
	1472.24	1026.06		3519.15	1642.87		4054.97	1987.06		237.936	1153.85		1359.44	1589.1		157.594	1416.1
	1798.79	1703.06		1992.15	1070.87		2377.55	1354.26		1244.98	1619.71		2226.08	1728.16		0	1256.34
	272.028	1164.56		1570.15	1030.87		3405.03	937.327		888.981	1622.21		4760.83	3239.11		252.129	1329.72
	7.52836	1186.06		2138.15	1088.87		3501.88	921.812		1440.98	1611.71					0	1271.34
	575.162	1422.4		1179.15	1031.87		1809.55	710.264		1620.98	2408.85		2142.73	698.114		2267.79	1316.95
	2329.2	1323.93		2533.65	1723.37		1478.51	747.356		213.981	1719.71		1203.33	593.747		57.8689	1410.74
	2567.42	1191.26		2331.15	1645.18		2192.91	514.287		1287.91	1933.68		2043.33	583.747		266.898	1265.34
	2686.53	1081.81		2067.71	1326.56		2199.48	1104.33		1142.98	2373.71		2010.76	1046.51		155.898	1077.34
	389.278	1179.66		0	1040.04		794.545	594.264		144.981	934.712		1792.05	1016.87		307.898	1306.34
	1424.91	886.295		1957.29	1351.09		188.545	591.264		1571.21	1238.23		1148.67	863.392		667.898	1113.34
	1336.92	973.491		2407.1	431.984		2260.55	600.264		1392.98	1758.21		3170.83	969.247		1343.4	1827.9
	1440.53	1129.06		1947.15	423.366		4247.55	1075.26		1104.48	1125.71		931.33	869.747		307.898	1270.34
	2193.53	1365.06		2106.15	1066.1		3375.34	1380.11		1013.14	2206.71		1851.33	912.747		138.898	1089.34
	929.694	766.716					1107.55	665.264		2755.48	1797.96		2852.53	1041.55		617.398	1103.34
	2264.86	588.227		664.947	670.167		966.212	456.264		330.737	2993.25		0	757.527		1164.9	1087.34
	910.99	621.06		1414.63	929.04		2097.55	1110.26		838.374	2490.96		0	608.655		60.9557	1418.14
	403.528	1338.06		367.382	463.959		1527.55	1154.26		656.981	2442.71		1366.14	1054.89		0	1069.34
	2295.78	1411.31		221.382	431.959		2286.19	1538.87		514.981	1683.71		1773.33	994.747		0	1145.34
	1360.99	1677.13		2080.38	1069.96		1756.55	671.264		0	2351.31		1138.33	688.747		94.3984	1121.34
	1396.2	1750.05		758.382	394.959		684.545	586.264		0	2431.71		7.00608	426.017		110.898	1084.34
	1943.99	1412		2113.99	710.699		1467.08	691.734		416.092	2440.71		702.83	619.247		73.8984	1281.34
	1598.35	1230.42		1884.38	600.959		2671.57	1327.41		104.981	2354.71		482.421	707.252		59.8984	1099.34
	1312.96	1202.63		1955.35	444.243		1533.55	1111.26		1001.97	75.2243		0	681.747		556.898	1272.34
	1196.53	1111.06		2361.35	1620.82		5200.3	996.264		1494.97	1252.53		519.988	1194.44		1440.9	1318.34
	2013.35	1208.07		1109.38	604.959		4506.55	1010.76		1384.98	1472.71		0	344.747		526.898	1072.34
	0	981.06		2661.48	968.894		4766.61	1833.69		1076.98	1487.71		0	519.747		677.273	1152.96
	448.528	948.06		899.382	602.459		6280.82	1292.69		988.314	1403.38		235.268	1005.76		522.398	1105.84
	3433.3	1335.26		3125.52	794.359		541.545	552.264		1608.98	1392.71		34.3304	409.747		1301.9	1107.34
	15.0578	1192.49		2537.38	765.959		974.545	527.264		1550.98	1531.71		2242.09	1558.71		709.898	1073.34
	1674.67	1165.2		1086.38	603.459		1444.55	490.264		1003.98	1634.71		0	906.502		405.898	1091.34
	1932.53	1047.06		1909.72	760.959		980.484	616.603		1623.98	1502.71		0	506.747		0	1087.34
	172.528	927.06		2390.33	1497.11		2103.29	677.724		1230.54	1425.38		2370.8	2416.78		464.712	1444.39
	0	384.592		1191.38	590.959		3130.02	1050.47		1640.98	1452.71		420.743	1312.36		218.698	1141.74
				3195.64	832.107		2481.95	1282.73		0	1874.66		458.33	533.747		269.898	1073.34
	559.301	445.054		2388.18	1074.97		3368.44	1024.33		0	1397.71		0	593.747
	960.579	347.663		2955.66	1546.09		1523.55	521.264					252.33	584.747		28.8554	740.101
	994.079	550.163		1479.38	996.459		1400.88	530.598		0	970.193		32.3304	505.747		216.517	493.342
	1224.08	548.663		1743.38	979.959		1064.55	496.264		1164.81	1328		977.33	1944.75		1098.01	465.671
	0	353.663		1313.38	1017.96		766.545	527.264		1546.81	1251.33		0	567.747		207.754	207
	0	356.663		2106.38	607.959		2648.48	772.321		376.814	1346		0	603.997		1189.95	1580.38
	0	376.163		1830.37	994.734					678.001	1625.09		0	613.449		2019.25	1515.5
	1025.87	601.683		1354.38	1021.96		138.716	289.042		734.814	1310		0	689.82		458.563	1973.15
	277.579	478.663		2232.52	1182.65		2639.89	1217		476.136	930.187		0	737.957		782.814	1300.44
	2009.71	1072.15		3083.3	1192.48		4793.32	1235.28		0	763.595		0	569.747		140.254	1463.5
	419.579	513.663		1154.87	893.693		3017.89	1219		2259.68	1938.14		0	1317.75		0	1004.5
	219.579	469.663		1568.38	1269.15		3266.14	1642.82		4110.77	2108.27		0	868.747		1216.84	1197.95
	1147.6	1002.28		2935.38	743.959		2326.89	1229		0	1816.17		0	855.747		843.254	1088.5
	2384.7	951.508		0	565.959		2813.89	1234.5		2362.06	2864.14		1672.75	1914.02		1442.25	1049.5
	140.579	788.663		2801.38	1230.46		2347.89	1215		0	1411		90.8304	819.247		1066.25	1038.5
	898.579	794.663		1573.2	555.853		3869.03	1426.43		249.885	895.41		0	1197.25		166.978	1114.36
	2518.58	767.663		1049.38	467.959		3171.56	1258.33		2635.17	1541.27		89.3304	868.747		581.254	1063.17
	124.945	649.626		4072.86	1253.23		1980.39	1228.5		2126.81	1135		0	1363.75		1095.61	1181.15
	0	632.663		1322.38	784.53		3794.59	1292.5		1316.45	1486.58		0	975.774		624.254	989.5
	0	528.663		711.382	441.959		1669.89	1232		1201.81	811.995		0	640.747		2071.6	733.173
	0	516.663		3829.16	1661.9		3627.23	1401.22		2289.65	2233.5		0	700.747		0	1436.53
	0	575.663		826.382	519.959		2806.8	1725.31		424.238	2570.92					0	1387.5
	0	548.663		2515.88	782.207		2284.29	1307.46		1276.01	1111.48		0	999.051		0	1408.25
	0	580.413		2307.21	1289.45		3000.89	1247		515.243	1857.57		0	704.277		181.254	1536.5
	1420.16	943.482		3673.01	1642.7		1365.89	1292.33		313.814	1733		112.373	1360.78		1412.25	706.5
	0	535.663		1594.38	690.959		2417.89	1307					1238.52	893.852		1162.22	759.468
	2103.4	830.928		1628.38	696.459		2092.89	1256		442.229	841.588		630.54	641.488		1205.31	875.165
	83.579	588.83		2013.38	674.959		1679.92	1191.33		0	1137.35		439.629	652.515		0	1393.5
	10.579	557.663		2838.96	946.452		1567.45	1176.22		283.563	1337.59		669.373	585.321		219.254	1374.83
	325.079	552.913		3412.88	1195.96		2259.89	1232		2280.23	1335.59		1791.87	599.405		104.254	1364.5
	1274.58	640.663		1679.54	889.998		2855.89	1326		245.732	1531.65		0	397.321		615.473	616.046
	1117.58	553.663		3709.88	1269.26		862.891	1076		0	1244.44		402.196	571.466		797.254	363.5
	683.579	528.163					2430.89	1093		0	1324.59		0	658.835		814.254	361.5
	2340.58	553.163		1725.59	768.228		2346.12	1529.38		0	1045.59		0	615.321		700.982	1821.28
	575.151	696.976		189.332	343.241		1281.39	1066.25		0	986.588		0	530.321		370.254	428.5
	236.579	537.663		611.332	362.241		1085.89	1125		0	974.588		491.33	489.661		371.254	590.5
	1018.8	531.054		1251.74	517.683		517.891	1065.5		0	1033.59		1150.37	513.321		1255.25	360.5
	1372.28	586.814		2686.33	1093.04		1810.89	1273		79.7417	587.291		1345.37	511.321		0	1525.56
	518.579	500.663		2469.5	1470.43		1123.89	1241		132.229	470.588		242.373	286.321		0	1410.5
				4176.74	1144.42		2487.03	1365.7		65.3202	1187.78		1183.09	471.931		0	1373.5
	1368.64	520.459		3719.18	828.507		192.891	1087		0	1177.37		244.373	294.321		0	402.5
	670.379	735.302		1554.33	1014.24		1591.93	1353.56		507.08	867.61		429.689	1626.31		0	396.5
	371.419	2064.67		3255.3	1347.2		238.891	53.998		740.737	1294.18		808.17	953.021		0	618.878
	1377.14	867.236		2856.49	1473.59		108.891	1089		1063.23	994.588		1338.09	982.36		0	451.5
	997.635	621.459		1581.33	1105.24		2613.89	1304		525.249	1367.11		83.53	818.799		808.254	413.5
	789.302	1646.79		2947.83	1052.24		1571.89	1263		1314.36	969.382		0	1282.53
	1724.48	1864.49		1526.3	969.045		0	42.998		876.229	946.588		0	621.321		2889.69	420.678
	490.196	1278.11		2302.33	1018.24		684.266	1180.97		751.16	403.761		693.373	1473.32		2991.38	608.478
	188.405	1689.15		3041.33	1041.74		256.224	33.6647		776.113	883.91		198.966	997.029		2853.69	934.271
	2223.64	1645.46		3232.62	1075.95		10.891	111.998		904.349	953.495		114.762	821.545		2685.47	570.478
	631.635	1016.46		2290.33	1062.24		0	37.998		0	1896.2		970.778	1048.56		2551.02	770.345
	30.6354	979.459		3893.84	1322.63		351.558	41.3313		1036.69	702.108		935.759	2086.58		0	1123.1
	0	976.459		4992.33	1038.24		542.891	1089.66		633.532	1391.33		635.373	1480.82		0	153.478
	389.635	983.459		3179.25	1135.63		2206.06	1390.16		0	1346.59		129.373	778.321		3441.19	819.728
	0	1028.96		3814.33	1110.24					382.155	765.245		312.373	741.321		3630.69	2481.08
	2630.64	947.959		2567.47	1133.11		2441.28	332.144		0	592.838		0	754.921		3333.13	686.478
	0	971.459		3419.37	1185.44		2507.19	328.644		739.511	723.432		527.352	1005.43		1598.69	253.272
	467.617	1455.14		3708.74	1507.67		2656.11	340.811		0	2459.02		967.373	729.321		1265.69	690.478
	2064.07	1663.83		2781.83	1166.74		2026.44	352.144		729.817	740.62		523.873	801.821		2235.69	695.478
	1623.64	1413.46		1947.33	1230.24		1557.44	342.144		0	1860.59		0	732.321		2231.69	736.144
	445.435	1533.39		2017.23	1152.73		3589.44	326.144					0	743.321		1505.69	731.478
	1219.64	1283.46		2537.17	1179.57		2779.44	327.144		290.627	913.843					1208.69	714.478
	1236.58	1858.74		3169.73	1190.84		1943.44	413.144		0	1281.67		1232	1676.09		1065.69	762.478
	609.635	1417.46		4429.11	1423.08		3167.44	361.144		133.877	910.593		1473.79	415.344		1113.91	845.478
	1231.87	1696.22		1974.67	1122.81		2247.94	361.144		479.27	1621.08		287.655	1163.18		1054.69	788.793
	513.635	1614.46		3545.52	1265.4		2665.62	2003.02		486.404	496.138		215.227	1184.84		1627.69	778.478
	1815.64	1591.46		1830.63	1162.89		1823.81	1797.05		570.877	278.593		51.6115	1362.01		1200.69	752.478
	1569.53	2066.06		1909.33	662.604		1908.44	1737.14		0	1201.59		649.286	687.211		1658.69	794.478
	469.547	1137.15		4056.33	1189.24		3942.79	2326.37		707.877	1182.59		2502.66	417.058		1090.69	712.478
	0	1362.28		3935	1304.5		1816.54	1860.02		16.8772	1169.59		247.543	850.896		1281.69	743.478
	394.359	1107.08		1542.33	594.241		2538.99	1859.05		0	266.593		678.227	557.844		3155.69	714.478
	68.6354	837.459		3943.47	1555.86		801.442	1721.14		2609.25	324.843		0	1905.75		1780.19	682.478
	791.635	1771.46		1773.33	594.241		5035.44	1768.14		387.146	1655.63		1197.23	1040.84		1442.69	732.978
	0	1154.46		2818.58	618.241		3010.44	1741.14		2982.88	320.593		1646.23	351.844		1505.69	724.478
	0	913.641		3848.5	1634.6		1735.38	1754.58		1646.88	390.593		1652.23	1234.84		2469.72	736.478
	0	1404.06		3008.14	1649.5		2745.81	2054.48		3014.88	275.593		0	442.707		2429.02	1508.74
	655.635	856.459		2940.98	848.887		522.442	1764.14		0	1095.16		0	578.844		777.695	460.419
	553.969	848.126		4467.68	1379.28		1948.49	2082.36		710.655	1100.7		0	1524.89		1014.36	482.978
	0	870.459		2131.33	700.241		2590.45	2062.01		967.771	1145.93		0	1284.84		1265.69	744.144
	0	1169.46		4068.63	1336.55		362.442	414.573		514.877	1093.59		0	1385.05		1235.59	714.478
	0	1253.9		4205.33	1180.24		1026.58	511.573		0	1098.59		0	1220.84		1270.69	689.214
	0	1233.46		3795.58	1215.05		1749.44	1722.14		0	1145.66		0	373.844		1031.09	737.478
	0	1250.46		1322.33	701.241		1021.44	1717.14		0	1068.59		510.586	1395.05		2913.69	466.564
	0	1154.46		2757.93	1028.93		2424.44	1760.48		0	1089.59		0	381.844		2164.69	637.478
	982.276	1103.36		4560.73	1204.04		1620.44	1744.14		960.877	1093.59		0	444.844		1776.69	320.978
	0	1182.46					3068.69	1747.14		0	1159.59		0	507.389		1987.69	280.478
	410.431	1648.96		3927.3	726.329		4406.62	1815.32		62.8772	1046.59		0	403.399		3126.69	712.478
				3032.81	669.565		4227.56	1793.07		528.545	1454.8		0	982.01		2549.9	318.478
				7417.29	926.93		1848.24	356.744		0	1068.59		0	1222.84		1524.69	838.362
				5315.96	787.638		4043.44	1785.98		0	1046.59		0	471.594		2492.69	286.478
				3577.72	811.171		3147.44	1875.14		0	1141.59		0	482.844		2478.69	567.478
				4213.07	806.048		1159.11	428.144		0	1082.59		0	497.844		1689.69	1350.48
				6264.52	1024.49		1598.94	393.144		0	383.593		0	481.844		2594.69	603.478
				2780.59	519.59					0	508.331		0	344.844		1219.69	545.478
				7355.67	1052.72					266.568	1160.47		0	513.844		2151.69	600.478
				2597.56	619.81					0	1129.59		0	486.844		1938.69	543.478
				999.124	494.971					0	730.479		0	594.696		2704.69	548.478
				7710.02	1168.7					0	405.593		0	401.344		3170.69	405.478
				4933.12	832.971					0	394.593		0	544.344		2321.69	1327.48
				6754.62	879.096					916.877	426.593		0	551.844		1834.69	559.478
				3010.12	593.971								0	347.844		1859.69	564.478
				5210.27	765.89								58.8367	1189.26
				4867.42	850.071								1030.3	479.305		2541.91	861.934
				2149.66	660.721								1362.33	410.344		1337.83	864.767
				5144.12	866.971								0	481.844		1572.27	1104.63
				6733.12	841.971								0	507.844		247.336	972.592
				2516.12	589.971								2518.28	593.288		0	801.267
				828.124	597.971								2962.23	516.844		958.442	869.545
				4152.57	758.288								0	909.844		1157.51	1158.7
				2639.19	682.764								0	822.844		1155.6	894.923
				580.124	589.971								631.227	366.844		685.201	1246.4
				4684.84	1011.44								906.227	1035.84		573.164	936.642
				5332.12	833.971								0	425.267		537.08	869.642
				2431.65	593.482											656.83	779.767
				4104.14	779.499											762.83	779.767
				3007.12	687.971											161.83	813.767
				2990.12	503.971											259.83	845.767
				5054.03	628.229											0	766.767
				3621.12	519.471											1883.83	762.767
				1036.12	447.971											499.83	866.767
				3350.12	534.971											1155.33	821.267
				5796.1	1014.38											1922.07	894.916
				10028.4	838.725											102.83	802.767
				2790.12	899.971											44.8305	761.767
				1516.34	900.493											0	851.517
				4988.35	1134.18											1873.83	760.767
				2937.12	878.971											952.83	762.767
				3521.12	876.971											1520.83	779.767
				2673.36	646.383											1998.83	766.767
																1458.4	852.854
																2078.83	821.767
																739.91	1211.86
																1865.33	783.767
																2564.91	1371.37
																1037.83	933.767
																1008.83	889.767
																1514.83	902.767
																1798.53	820.267
																2523.33	827.767
																1198.83	774.767
																772.83	761.767
																1252.83	814.267
																1023.42	993.717
																1573.9	365.097
																2235.46	744.972
																513.23	284.639
																1970.97	365.743
																0	461.381
																3457.84	1104.97
																1654.4	787.784
																2424.5	343.753
																1900.42	445.264
																2256.3	1186.56
																1797.67	388.33
																2939.47	741.558
																844.267	498.092
																1193.26	1112.72
																896.019	576.502
																650.77	242.444
																727.1	989.642
																1533.11	1008.76
																1391.31	1075.47
																2069	366.454
																2570.78	1182.83
																1868.22	686.076
																1272.5	810.979
																743.403	597.613
																1752.63	569.231
																3066.76	1765.41
																3122.6	839.282
																1753.01	964.229
																3017.27	1449
																2374.47	1204.88

## Sheet: Ratio Combined
	Untreated	BI2536	RO3306	Reversine	MLN8237	AZD1152
	0.0853732	2.02501	0.550392	2.17718	0.852716	1.68237
	0	3.23657	0.117921	0	0.638076	0
	0	3.84364	0.16371	1.90529	0	3.14813
	0	2.37362	2.3279	2.48755	0.27624	2.49154
	0.10793	3.7339	2.30053	2.13609	0	2.38253
	1.11267	1.04664	4.43915	2.62389	0	3.11827
	1.72334	2.73457	1.4845	2.53501	0.883175	0
	0	0.953988	2.96501	2.68287	0	0.680831
	0	1.20867	4.3755	3.30628	0	5.38531
	2.3286	0	3.24456	0	1.21626	0.894128
	0.950429	2.04545	4.63922	3.42289	0.966558	4.28427
	0	1.93711	5.46293	0	0	1.26874
	0.898431	1.81016	2.27857	0	0.478899	8.46102
	0	1.59981	5.65902	0.368245	0	2.52749
	0.706123	2.10994	7.03793	0	0	0
	0.682187	2.70585	2.27512	2.86529	0	12.9583
	0	2.8793	3.73471	0	0	1.11723
	0	2.7015	4.8222	0.161158	0.561308	0.0720593
	2.75932	2.42742	3.16074	0	0.991316	0
	0.694282	0.942896	1.52663	0	0	0
	0.609542	1.33572	2.74446	0	0.258384	0
	0.353134	1.19244	4.24087	0	0.315299	0.0495424
	0.393306	0.80658	0.380565	0	0
	0.855485	1.78453		0	0.573777	3.37263
	1.08592	1.8032	3.05674	0	0	2.55208
	1.03522	2.0962	2.16441	0	0	1.25552
	1.66393	1.47275	4.60558	0	2.51551	3.09706
	0	2.70117	0.526436	0	0.562662	3.94769
	2.62648		1.39235	0.215682	0.202679	3.17256
	3.33816	4.37556	2.73675	0	0	3.5434
	0	2.64875	1.79349	0	0.45825	4.16194
	1.48217	1.26984	1.22174	0	0.0400831	2.72653
	1.71933	2.2212	2.80138	0	0.188424	2.31143
	1.89156	1.86924	1.11785		0.9661	3.80534
	2.27607	1.6688	1.22736	4.74869	0.875361	4.62621
	3.17152	2.02072	1.03896	6.53857	0	3.38323
	3.48509	2.43213	1.84377	6.51248	1.24034	5.03406
	1.3091	2.34362	2.34166	0.611764	0.181057	3.5411
	1.27565	2.54968	0.756627	0	0.864727	3.60079
	2.22398	1.81706	1.5666	0.702152	0.671717	3.4711
	2.2066	1.5312	2.13712	0.200596	1.02104	3.8549
	0.549827	2.4979	1.95601	0	1.56717	4.53543
		2.1292	5.3174	3.27345	0	3.36589
	0	1.51973	1.12022	1.4535	0.619799	4.11182
	0	0.941975	0.93062	0	0	4.42126
	0	1.1374	1.71638	1.19346	0.732694	4.09073
	0	2.09523	1.40361	0.609076	0	5.08629
	1.92588	2.02703	1.73897	0.216931	3.46859	4.10146
	0	1.31204	1.72601	0.156107	0.851716	4.44125
	0.385975	3.13915		0.0504758
	0	1.34931	4.99397	0.24063	0	2.25364
	0	0.156503	4.09557	0.10767	0	2.2135
	1.07918	0.467458	4.50582	1.06416	0.686269	3.5228
	0	0.443456	3.16981	0	0.462216	5.32101
	0	0	2.50778	2.75366	0	2.58299
	2.50461	0	3.91628	2.19858	0	5.64888
	1.86646	0	1.19624	0	0	7.49464
	2.13056	0	5.63864	0.96491	0	4.38507
	1.4543	2.21258	2.00077	0.198561	0	5.64421
	0	1.27017	3.19288	0.50833	0	2.46283
	0		4.17184	0	0	4.21905
	1.50065	7.93807	3.58442	0	0	2.43047
	0	4.68359	5.2912	0	0	2.72342
	0.714537	3.12295	3.94468	0	0.266241	3.48543
	5.07622	4.12416	3.74576	0	2.56145	3.8582
	3.7256	3.25559	2.7921	0.891916	1.8667	3.63635
	1.35369	4.9143	3.79569	0	1.77864	6.48321
	1.76419	3.46132	5.28033	1.54436	0.575465	7.41915
	3.8584	4.3119	3.28605	0	0	3.74727
	1.78319	3.51134	3.78882	0.343428	2.00609	4.33953
	1.11878	3.05059	3.28049	0	0	3.72049
	3.20515	2.65347	6.45303	0.00463171	0.210452	3.61394
	0	2.76058	3.07057	0.843974	0	3.94161
		2.90113	5.40253	0	2.09025	2.31329
	0	2.42177	2.60866	0	1.60491	3.00259
	0	1.80307	2.68373	0	2.28368	3.5139
	0	1.38515	0	0	0	2.54967
	0	2.38328	4.25249	0	0
	2.46209	3.33264		1.16751	2.06944	1.98892
	3.54252	4.10566	0.346237	1.41727	2.9098	1.60933
	0	2.79703	1.10896	3.16722	0	1.26394
	4.05161	2.49766	1.08009		0	2.71013
	0	2.50041	0.478754	0	2.44595	1.92568
	0	1.30848	1.1612	0.342425	0.0501384	2.35226
	5.64924	2.30951	2.06722	0.412536	0.907771	1.58809
	4.56717	4.26881	0.753044	0	0	1.40347
	0	3.09813	1.80249	2.82149	0	2.82317
	0	1.93369	1.7464	4.97233		2.93072
	5.17313	4.36756	1.14682	0	1.14271	2.20251
	4.42212	1.84578	0.6294	0	0	3.56183
	2.92915	6.65478	1.1941	0.54491	1.16951	1.64643
	0	5.69091	1.23951	0.154798	0	1.42423
	0	4.52696	0.563746	0.376083	0	1.92042
	0	2.74926	1.1727	0.0749345	0	4.04837
	0	0.947423	1.03629	0.17369	0	1.72558
	0.167532	2.43274	0.876935	1.18152	0	2.57625
	0	3.04507	2.05605	0.145614	0	4.24232
	1.00263	1.53705	1.55956	2.37018	0	3.54565
	0	2.09439	2.32548	2.65007	0	1.90145
	0	3.27527	1.40738	3.30738	0.782874	2.30891
	0	2.10029	1.35652	0.550378	1.49388	1.77969
	0	2.3184	1.1988	0.623034	0.369732	2.17877
	0	1.96269	1.34271	0.459191	1.37814	1.34894
	0	1.8086	1.19882	0.436454	0.672183	1.71746
	0.809607	3.71525	1.61188	1.07193	0	1.19191
	0	1.74765	1.56078	1.48617	0.927733	2.32171
	0	1.81134	0.716273	0.198148	0	1.99075
	0		1.53577	11.8799	0.0542263	2.72673
	0	4.59517	1.74987	7.94755	2.80611	1.71451
	0	10.1191	2.6539	0.360053	1.74057	2.04874
	0	6.70641	0.666048	0	5.23616	2.37172
	0	2.72711	3.51854		9.71325	2.80956
	0	5.63975	0.466138	0.852425	1.32065	3.30873
	0	5.57874	5.00506	0.652553	0.292198	2.64931
	0.13273	7.05656	0.425902	1.04846	1.712	1.14655
	0	6.41025	0.739326	0.751962	4.00742	1.36802
	0	4.73763	0.931598	0.443081	7.61155	1.29196
		6.49032	0.891206	1.0042	2.44301	1.18746
	0	6.51706	0.952242	0.768981	5.87941	1.84138
	0	10.7152	0.451993	0	3.26163	3.1662
	0	6.31525	0.937768	0	9.59488	1.58843
	0	6.21414	1.82641	0.140307	3.43879	1.39322
	0.00103848	3.98687	1.55376	0.26876	2.00593	2.31056
	0.405734	6.04249	1.27026	5.20114	7.05031	2.91891
	0.266634	6.78338	1.09991	2.4581	0	1.98683
	0.451603	5.4969	1.644	0	2.39534	1.69527
	0.118336	5.99365		1.61853	0	2.41262
	0	1.12669	1.33713	2.15839	2.35698	1.48845
	0.791617	5.65857	0	0.400126	1.62109	1.81354
	0	5.46213	0	0	0	1.6682
	0.835537	5.79802	0	1.60199	0	2.00355
	0.451593	3.38462	1.32176	1.35091		2.0241
	0	2.13053	0.76303	0	0	2.56511
	0	5.6191	1.01404	0.88985	0	1.78253
	0	6.28943	1.58097	0.0825088	0	1.4838
	0	4.36945	1.97934	0	0	2.44938
	2.861	6.54075	0.561987	0.406036	0	0.83914
	0.161444	6.18474	1.51093	0.246411	0	0.500976
	0	6.98474	4.66664	0.319828	0
	1.10977	6.3296	1.65161	0.654179	0	1.42232
	2.57106	5.78396	2.91661	0.279795	0	0.249074
	0.765557	6.29088	1.40721	0.753064	0	4.51504
	0	5.94793	2.06328	0.236512	0	0.898977
	3.12994	6.72339	1.80119	0.897515	0	2.21595
	0	5.48556	2.75566	2.43298	0	2.55398
	0	5.76957	1.21875	0.689907	0	3.51801
		5.80588	2.18619	1.21815	6.95522	3.14311
	3.05438	5.81339	2.5194	1.18048	3.52469	3.23299
	0	6.07864	0.753792	2.83824	0	2.11413
	0	6.31837	2.13412	1.26536	0	0.0863507
	41.8533			1.80976	0	2.51375
	0	4.10121	1.28734	1.68071	1.52692	1.75911
	0	3.25781	1.37253	1.81562	0.872805	2.51087
	0.221214	3.04405	0.0504011		14.6856	5.59374
	0	2.61931	3.15305	0.10057	2.79568	6.13948
	0.258491	4.24919	0.951911	0	0.53855	1.24206
	0	1.54632	1.17595	0	0	2.35679
	0	2.62202	1.19072	0	0.798011	2.96575
	0	0.700353	3.27924	0	1.79069	1.61256
	0	3.56424	0.227761	0	1.50786	1.9286
	0	3.39364	0.710913	0	3.01506	5.42333
	0.923901	4.40106	0.321718	0.27658	2.57217	2.57904
	3.98223	3.13147	0	0	3.14129	1.79811
	0.83805	0.838401	0.555777	0.192752	3.16365	0.448588
	0.723983	2.8335	0.0244954	0	2.5746	1.09766
	0.811389	3.2725	2.63555	0	1.8455	1.95529
	0.19441	0.801285	2.95757	0.0382401	0.712357	1.35489
	1.07161	0.678992	0	0	0.3117	2.00485
	4.32838	1.79312	0.268834	0.361474	2.20666	0.861779
	0	2.30805	2.89154	0.488562	0.7421	0.151544
	1.57558	3.29831	1.05625	0.485908	0.0318816	0.661224
	10.362	3.23734	1.59043	0.919981	0.33895	0.787613
	2.4546	2.59569	0.436937	0.196144	0.147313	0.966651
	0.850111	1.20148	0.231285	0.558802	1.52413	0
	0.202702	3.78124	0.558835	0.847031	0.0797806	0.909239
	0.595595	2.03292	1.6717	0.688176	1.80863	0.140691
	0.71049	4.10663	1.22955	0.0518657	0	0.303674
	0.705939	3.20863	0.810883	0.0442289	0	1.40985
	0	2.3063	0.959357	0	0.953673	0.705597
	1.57907	3.3219	2.08629	0	1.0636	0.593168
	0	3.20161	2.20908	0.278415	0	0.587605
	0.646969	0.668486	1.16171	0.091643	0.301888	0
	0	1.9431		0.10525	0	0.781093
	0	0.509529	2.04453	0.616632	1.14035	0
	0.578995	1.70438	1.84526	0.594687	0.760808	0.464564
		0.353523	2.27889	0.542333	0.193546	2.18576
	0.398308	0.0365756	2.47147	0.245382	0.39918	0.0508572
	1.75522	4.39751	1.97963	0.619386	0.269701	0.616487
	0.0868743	2.66373	4.66509	5.57225	0.453488	0.725795
	0.88093	1.70337	2.17279	8.86131		0.589403
	0.943347	3.88628	2.71545	0.507082	0.0254626	0.668472
	0.655397	6.19778	7.33577	3.67379	0.914696	0.370394
	0.250745		2.5122	4.41801	0.693372	0.90993
	0.383622	2.91975	2.85548	7.7166	0.0518893	0.154886
	0	3.06016	3.12083	2.63091	0	0
	0.10728	1.39287	3.52617	6.4728	0	0
	0	1.47864	2.14392	0.666887	0	2.86362
	0	4.4888	1.51557	0.939762	0
	0	3.47832	1.97659	0.892808	0.397784	2.65413
	0	2.94685	2.89394	0.563117	0	6.67826
	0	3.40727	2.27824	3.39037	0	1.22421
	0	3.5588	2.08002	0.763459	0.462189	1.69048
	0	0.263796	2.28579	1.43829	1.28615	4.96148
	0	2.55905	1.95663	0.0927839	0	1.4695
	0	2.66192	1.98798	0.468693	0	0
	0	2.42572	3.61988	19.0242	0	0.429724
	0	2.23108	2.56304		0.673068	1.4314
	0	2.11352	3.46477	0	0.28865	2.03868
	0	2.75251	3.50117	0	0	6.14945
	0	1.40813	4.6568	1.00745	1.35768	0
	0	3.98368		0	1.00671	0.871681
	2.44181	4.62298	1.67752	0	0	1.72457
	0.228091	1.70573	2.56678	0	0.968842	0
	1.82594	3.72223	2.4911	0.169362	0	0.734902
	4.05843	4.63471	2.29651	0	0.601132	0
	0.219861	4.90631	0	0	0.556687	0
		2.80729	0.0836818	0	1.15293	0.825821
	0	1.03689	0	0.242973	0	0.641182
	0	2.10267	1.45244	2.01681	0.362419	1.88847
	0	3.79331	1.698	0.868053	0	0.919771
	1.63152	2.91642	0.363324	1.85123	0.27592	1.6999
	0	3.07023	0.939116	3.12629	0	0.180975
	1.38728	3.7084	1.16142	1.17098	1.49554	0
	1.85495	3.00821	0.0309293	3.22159	3.37309	0.168959
	0.457276	1.79873	0.0245301	1.37993	0.0118628	0.0932806
	1.06456	1.94036	1.72412	2.73313		0
	0.762607	3.27166	1.17988	3.55628	1.04244	0.0878141
	0.60776	1.64568	0	0.780803	1.79609	0.179802
	2.60715	4.03814	0.438064	1.27358	2.80693	0.327075
	1.10323	3.43951	1.88648	1.55885	1.32777	0.371839
	1.67938	2.93051	3.61758	2.07145	1.62392	0.62862
	0.0222044	3.35651	2.41271	1.22201	0.347066	0.807618
	1.38015	4.52049	2.00964	1.74876	0	1.92936
	0	0.773741	0.63581	0	0	1.64689
	0	3.1412	1.69365	1.60969	0.266966	1.04126
	0	3.25533	0.177815	0.0487246	0.72846	0.280759
		2.90745	2.92336	1.52016	0	0.537577
	0	3.77167	1.85429	1.80955	0	1.68324
	2.80228	2.37368	1.13868	1.1318	0	1.39924
	1.71668	5.17571	0	0.861337	0	0.378991
	2.79465	1.31796	0	2.59899	0.53886	1.5307
	1.56704	2.47823	0.821328	2.22787	0.548056	0.88029
	3.11659	2.93018	1.26853	3.00137	0	2.47598
	0	2.87357	1.9517	0.392406	2.21281
	0	4.25322	1.81694	0.345706	0.757331	0.963511
	0	1.55704	3.00593	2.83543	2.53667	0.610107
	0	4.11654	1.42494	1.49939	9.42688	0.227438
	0	3.25221	4.55218	1.02546	3.21512	1.38341
	0	2.08312		1.18067	0	0.824574
	0	2.23493	3.86105	1.71955	0.427272	0
	2.36554	3.71824	8.37999	1.62936	0.3091	1.17612
	2.39685	6.54962	4.02269	0.394497	0.0710475	0.736873
	0	7.50692	4.47077		0	0.562628
	4.46091		2.752	0		1.05837
	1.47601	3.08475	4.80426	1.11444	1.30629	0.500093
	0	1.70951	6.84947	0	2.91771	0.94582
	0	1.59702	4.66505	1.66881	0.412448	1.87961
	2.31057	1.22626	2.25063	0.149977	0.962986	1.43769
	0.992744	0.850331	7.48837	0	0.830672	2.29215
	0	0	7.82937	0.810098	0.906863	2.73356
	0.399488	0	3.60798	1.07626	0.662129	2.32204
	0.722117	0.080236	5.64322	0.798604	1.3494	2.72711
	5.67628	0	6.5299	1.40875	0	1.12132
	0.271423	0.21073	5.94633	1.20214	0.647098	2.08947
	2.32164	1.15318	4.9418	0	0.709878	3.14762
	0	2.40151	5.19969	4.7185	2.60748	1.76358
	1.86837	2.0991	4.6052	0	0.559249	1.89538
	0.583775	1.04358	4.95782	1.42674	0	1.31406
	0	2.0299	5.04602	1.54846	2.64385	1.95758
	0	1.49039	2.65711	0.643342	3.14387	0.693115
	0.267821	1.60981	3.1885	0.124821	0.208315	1.32653
	0	1.80736	4.58692	0.484259	0	0.933241
	0	2.27255	0	0.843457	2.549	0.527132
	0.301428	2.23236	5.83648	1.85408	0.937931	0.854323
	1.16111		7.33866	0.849812	1.12876	0.802761
	0.964363	7.75296	8.68179	1.78033	0.871734	0.691371
	0.591943	5.02099	5.41238		0	0.566318
	1.37874	5.13616	3.67584	0.253104	0	0.738287
	1.32703	3.54474	5.35423	1.01041	0	1.38507
	1.79412	4.57059	3.37589	2.16767	0	0.493597
	1.82479	3.18974	2.07374	2.27427	7.05987	0
	0.674832	4.67153	3.82517	0.97752	0.778017	0.344679
	1.27852	2.91448	5.93322	3.15979	2.51665	0.766674
	2.26082	2.72119	4.10231	5.55078	0.0671416	0.407348
	0	2.23491	6.95487	0	2.87683
	0	5.01894	7.18123	1.31961	2.14791	2.14382
		7.03644	6.0795	0.930155	0.204252	1.8766
	3.78405	2.10511	1.29039	1.52387	0.10213	1.10989
	0	4.75602	6.15088	0.419883	0	2.28624
	2.36266	1.3714	5.67316	3.00884	0	2.31008
	1.09817	3.58323	5.25619	0	0.548577	7.9416
	1.40366	4.24208	7.11265	0	1.51586	2.09582
	1.48316	6.12298	7.04948	0.167265	0.457524	0.378209
	0.950915	1.9274	1.22181	3.23507	0	0
	1.4262	3.04033	7.65265	0	0	5.26004
	2.42967	2.82718	7.64557	0	1.04273	0
	1.3496	2.7653	5.15186	0	0.294321	0.980421
	3.19983	0.4826	6.53197	0	1.43765	2.00373
	7.03648	3.6412	6.4898	0	1.5674	1.31371
	3.06062	1.38136	5.87519	0	0.153131	0.0227068
	1.14872	2.0936	6.59103	0.634117	1.85625	0
	1.90907	2.40478	3.93145	1.79589		2.28248
	1.78214	3.614		1.31678	0.153113	1.87912
	0.662353	3.40157	2.00574	2.3189	0.417075	0.382464
	1.40535	3.86463	0.456594	0	0.118218	1.67001
	2.25928	4.38342	3.62962	2.6306	0.406397	1.05146
	0.920148	7.11674	1.83162	2.6172	0.15963	0
	2.25872	5.68566	4.72311	1.90101	1.52123	1.02634
	1.60763	2.73213	2.68706	0	0.766984	0
	1.23742	2.96502	6.71995	0.548535	0.64908	1.22455
	0.683658	5.43154	2.56237	1.77741	1.45648	0.867211
	2.17026	9.26456	3.67111	0.423811	1.57102	0.428035
	0	4.94472	4.2123	2.72091	1.92156	0.397044
	0.211494	4.92514	3.52066	2.09225	1.20306	0.684131
		5.40653	3.0555	2.68376	1.0527	1.51902
	0.0676645	2.4058	2.93987	3.7821	1.73486	1.08668
	0.9856	5.58917	3.20181	1.07705	0.403058	0.656306
	0.259751	6.90595	4.88416	3.25737	0.672479	0.858807
	1.06338	7.25861	3.51362	0	0.426094	1.33856
	0.317559	6.58779	6.26656	1.77658	0.276685	0.963833
	0.26744		3.83988	1.84824	0.310333	0.956515
	0	0.0505009	4.60028	0	0.420662	1.56085
	0.711019	0.251088	6.15028	0	0.988839	2.6472
	0.610054	0.370059	2.2658		0.615401
	0.587892	2.69533	4.46179	0	1.65257	0.25707
	0.0591851	0	3.30803	0.341219	1.78376	0.0196463
	2.33756	0	7.9462	0	1.71375	28.9214
	0	0	4.38832	2.37562	2.00733	3.96594
	0.49771	2.51263	5.33984	3.20757	1.92214	0
	2.48314	1.00723	3.48408	0.935319	1.26111	8.45503
	2.26812	2.03379	6.23554	2.05563	0.814394	7.73732
	0.0665632	2.63385	2.36275	4.20789	0	0.0547243
	0	1.44963	3.50116	0	0.499254	0
	0	0.805272	2.19598	0	0.632728	0
	0.551028	1.2919	3.86611	2.10601	1.35018	0.402391
	0	1.90043	2.58088	3.86054	1.40014	0
	0.259206	1.95295	3.26898	0	0.804434	0
		2.28762	0.849485	0	1.42031	0.0926238
	1.46761	4.67553		1.35684	0.932778	0
	2.19359	2.52613	3.46184	0.823159	0.0395227	0.16221
	0.0750838	1.69197	2.69984	1.14123	1.59471	0.235071
	0.835685	1.67928	2.28118	0	0.0335664	0
	1.43485	2.14208	2.04069	0.20621	0.855483	0.111287
	1.05621	1.86032	1.7556	0.768644	1.28812	0
	0.233589	1.52314	3.6327	0.548006	1.4698	0.189611
	0.00634736	1.96365	3.79891	0.894069		0
	0.404361	1.14274	2.54771	0.672926	3.06931	1.722
	1.7593	1.47018	1.97832	0.124428	2.02667	0.0410201
	2.15521	1.41696	4.26398	0.666043	3.50037	0.210931
	2.48336	1.5587	1.99168	0.481516	1.92139	0.144707
	0.329992	0	1.33702	0.155108	1.76233	0.235696
	1.60772	1.44868	0.318885	1.26892	1.33041	0.599907
	1.37332	5.57219	3.76592	0.792272	3.27144	0.734939
	1.27586	4.59922	3.95023	0.98114	1.07081	0.242376
	1.60691	1.97557	2.4457	0.459116	2.02831	0.127507
	1.21257		1.66482	1.53256	2.73873	0.559574
	3.85032	0.99221	2.11766	0.110494	0	1.07133
	1.46683	1.52268	1.88923	0.336566	0	0.0429829
	0.301577	0.791842	1.32339	0.268956	1.29506	0
	1.6267	0.512507	1.48562	0.305861	1.78269	0
	0.811498	1.94436	2.61677	0	1.65276	0.0841839
	0.797809	1.92016	1.16764	0	0.0164455	0.102273
	1.37676	2.97453	2.12087	0.17048	1.13498	0.057673
	1.29903	3.13563	2.01263	0.0445834	0.682107	0.054486
	1.09174	4.40152	1.38	13.3198	0	0.437698
	1.07692	1.45689	5.2198	1.19357	0.43534	1.09297
	1.66658	1.83381	4.45855	0.940429	0	0.491356
	0	2.74693	2.59946	0.723918	0	0.587421
	0.473101	1.49285	4.85873	0.70424	0.233922	0.472401
	2.57125	3.93464	0.980591	1.15529	0.0837844	1.1757
	0.0126272	3.31269	1.84831	1.01258	1.43842	0.661394
	1.43724	1.80026	2.94646	0.614164	0	0.371928
	1.84567	2.50962	1.59014	1.0807	0	0
	0.186103	1.59663	3.10346	0.863305	0.980977	0.321735
	0	2.01602	2.97963	1.1296	0.3206	0.191549
		3.84042	1.9349	0	0.858704	0.251458
	1.2567	2.22162	3.28843	0	0
	2.76296	1.9117	2.92279		0.431521	0.0389885
	1.80688	1.48464	2.64019	0	0.063926	0.438879
	2.23102	1.77904	2.14512	0.877122	0.502549	2.35791
	0	1.29021	1.45382	1.23614	0	1.00364
	0	3.46468	3.42925	0.279952	0	0.752947
	0	1.84006		0.417207	0	1.3324
	1.705	1.32528	0.479915	0.560929	0	0.232402
	0.579905	1.88773	2.16918	0.511871	0	0.601962
	1.87447	2.58561	3.88034	0	0	0.0958348
	0.816837	1.29225	2.47571	1.1659	0	0
	0.467525	1.23577	1.98813	1.94983	0	1.01577
	1.14499	3.94562	1.89332	0	0	0.774694
	2.50624	0	2.27938	0.824704	0.873947	1.37423
	0.17825	2.2767	1.93242	0	0.110871	1.02673
	1.13077	2.83024	2.71238	0.279074	0	0.149842
	3.28084	2.24247	2.52045	1.70975	0.102827	0.54672
	0.192333	3.24988	1.61204	1.87385	0	0.927579
	0	1.68557	2.93586	0.885554	0	0.630878
	0	1.60961	1.35543	1.48008	0	2.82553
	0	2.30408	2.58862	1.02514	0	0
	0	1.58932	1.62684	0.165014		0
	0	3.21638	1.74711	1.14803	0	0
	0	1.78929	2.40649	0.277375	0	0.117966
	1.50523	2.23596	1.05692	0.181082	0.08258	1.99894
	0	2.30749	1.84996		1.38559	1.53031
	2.53138	2.33809	1.66632	0.52547	0.982934	1.37723
	0.141941	2.98297	1.41012	0	0.673745	0
	0.0189702	2.99958	1.33261	0.211995	1.1436	0.159477
	0.587939	2.85368	1.83433	1.70728	2.98942	0.0764047
	1.98947	1.88713	2.15377	0.160436	0	0.999069
	2.01852	2.92287	0.801945	0	0.703797	2.19327
	1.29426		2.22406	0	0	2.25243
	4.23126	2.2462	1.53403	0	0	0.384885
	0.82521	0.551601	1.20178	0	0	0.86407
	0.440013	1.68764	0.965238	0	1.00341	0.628712
	1.91844	2.41797	0.486055	0	2.24104	3.48198
	2.33852	2.45767	1.42254	0.135779	2.63117	0
	1.03578	1.67944	0.905635	0.280987	0.846508	0
		3.64964	1.82107	0.0549935	2.50692	0
	2.62967	4.48902	0.177453	0	0.830295	0
	0.911706	1.53251	1.17611	0.584457	0.264211	0
	0.179893	2.41635	4.42407	0.572359	0.848009	0
	1.58796	1.93845	0.0999919	1.06901	1.36211	0
	1.60531	1.43076	2.00452	0.384203	0.102015	1.95467
	0.479297	2.80148	1.24457	1.35588	0
	0.924908	1.57506	0	0.925671	0	6.86913
	0.383533	2.26109	0.579412	1.86041	0.470619	4.91617
	0.111538	2.91947	7.61108	0.878045	0.199559	3.05446
	1.35138	3.00442	0.0972431	0.948457	0.13969	4.70741
	0.621408	2.15613	0	0	0.925824	3.31153
	0.0312779	2.94402	8.50584	1.47654	0.448466	0
	0	4.80845	0.498218	0.455342	0.429068	0
	0.396189	2.79956	1.5869	0	0.166221	4.19796
	0	3.43559		0.499389	0.421374	1.46335
	2.77505	2.26586	7.35004	0	0	4.85541
	0	2.88447	7.62889	1.02223	0.524506	6.31217
	0.321354	2.45991	7.79349	0	1.3264	1.83307
	1.24055	2.38428	5.75458	0.985413	0.653354	3.21462
	1.1487	1.58289	4.552	0	0	3.0316
	0.29049	1.74996	11.0057		0	2.05843
	0.950272	2.15092	8.49607	0.318027		1.69172
	0.665281	2.66176	4.70403	0	0.735047	1.39767
	0.43009	3.11234	8.77057	0.147022	3.54836	1.31749
	0.726246	1.75869	6.2245	0.295649	0.247301	1.3371
	0.318147	2.8019	1.3308	0.98038	0.18165	2.09087
	1.14086	1.57421	1.01489	2.04914	0.0378935	1.59566
	0.759671	2.88156	1.09861	0	0.944812	2.08778
	0.412916	3.41086	1.69482	0.59858	6.00074	1.53085
	0	3.01649	0.976622	0.01443	0.29092	1.72392
	0.356217	2.59547	1.36574	0	1.2158	4.41679
	0.0819567	2.53459	0.465645	8.03234	0	2.60843
	0.446883	2.9842	2.84787	0.233836	1.15025	1.96827
	0	4.55904	1.729	9.30424	4.67886	2.07832
	0	2.3544	0.989056	4.21635	1.338	3.35343
	0	1.82367	1.3365	10.9396	0	1.60996
	0.765519	3.46451	0.296145	0	0	1.6891
	0.653168	3.23915	0.935713	0.645636	0	2.10022
	0	3.04371	1.25627	0.844526	0	1.70087
	0	3.04412	0.874254	0.470812	0	1.72936
	0	3.56311	2.00672	0	0	1.84369
	0	3.1238	1.01585	0	0	1.39813
	0	1.8857	0.594849	0	0.365998	6.245
	0	2.68037	1.37715	0	0	3.39572
	0.89026	3.78786	0.929076	0.878642	0	5.53526
	0		1.7564	0	0	7.08682
	0.248903	5.40706	2.42746	0.060078	0	4.38848
		4.52953	2.35772	0.363312	0	8.00653
		8.002	5.18086	0	0	1.81866
		6.74924	2.26399	0	0	8.70119
		4.41057	1.67851	0	0	4.36792
		5.22682	2.70728	0	0	1.25118
		6.11477	4.06706	0	0	4.29957
		5.3515		0	0	2.23601
		6.98731		0.229706	0	3.58331
		4.19089		0	0	3.5672
		2.01855		0	0	4.93128
		6.59711		0	0	7.81966
		5.92232		0	0	1.74895
		7.6836		2.1493	0	3.2793
		5.0678			0	3.29454
		6.80289			0.0494733	2.94908
		5.7259			2.14958	1.54704
		3.25351			3.31997	1.42335
		5.93344			0	0.254306
		7.99686			0	0
		4.26483			4.24462	1.10223
		1.38489			5.73138	0.998978
		5.47624			0	1.29128
		3.86545			0	0.549746
		0.983309			1.7207	0.611935
		4.63186			0.874868	0.617588
		6.39366			0	0.842342
		4.09726				0.97828
		5.2651				0.198866
		4.371				0.307213
		5.93313				0
		8.04489				2.46973
		6.97079				0.57666
		2.31293				1.40677
		6.26225				2.14777
		5.71393				0.128095
		11.9567				0.0588506
		3.10024				0
		1.6839				2.46308
		4.39819				1.24918
		3.34155				1.95036
		4.0151				2.60683
		4.13588				1.71002
						2.52971
						0.610555
						2.37995
						1.87033
						1.11144
						1.13381
						1.67799
						2.19261
						3.04836
						1.54734
						1.01452
						1.5386
						1.02989
						4.3109
						3.00074
						1.80309
						5.38895
						0
						3.12936
						2.10007
						7.05303
						4.26807
						1.90155
						4.62924
						3.96391
						1.695
						1.07238
						1.55423
						2.6842
						0.73471
						1.51979
						1.29368
						5.646
						2.17342
						2.72305
						1.56908
						1.24395
						3.07895
						1.73714
						3.72056
						1.81805
						2.08232
						1.97072
