# Supplementary material for: Centromere protection requires strict mitotic inactivation of the Bloom syndrome helicase complex
Source: Research Square preprint supplement (doi:10.21203/rs.3.rs-4420374/v1), 2024-05-30
Supplement: Supplementary file 49 [file Fig S4C. HeLa CENPBmCRMI1 BLM_Kinases inhibition_Line Plot.xlsx]

## Sheet: Fig 3D_Line plot normalised
						Normalised		Max CEN	Max BubR1
	Untreated: Average Values							0.858447	0.8373			SEM (STD/SQRT(N)
	Distance (microns)	BLM	CENPB-mCherry-RMI1	BubR1		Distance (microns)	BLM	CENPB-mCherry-RMI1	BubR1			BLM	CENPB-mCherry-RMI1	BubR1
	0	0.292244	0.333085	0.378979		0	0.340433	0.388009	0.452621			0.0777901	0.0402812	0.0460282
	0.065	0.24171	0.337026	0.411222		0.065	0.281567	0.3926	0.491128			0.067669	0.0422398	0.0490669
	0.13	0.234184	0.360488	0.444137		0.13	0.272799	0.419931	0.530439			0.066337	0.0442643	0.0518194
	0.195	0.233974	0.386503	0.519159		0.195	0.272555	0.450235	0.620039			0.0668836	0.0463561	0.0546769
	0.26	0.253451	0.410266	0.597077		0.26	0.295244	0.477917	0.713098			0.0707005	0.0494685	0.0509694
	0.325	0.297388	0.489203	0.720112		0.325	0.346425	0.56987	0.860041			0.0810503	0.0546123	0.0475797
	0.39	0.324112	0.538241	0.774223		0.39	0.377556	0.626994	0.924667			0.0911205	0.0548044	0.0335391
	0.455	0.305855	0.601605	0.808494		0.455	0.356289	0.700807	0.965597			0.0892659	0.0543024	0.0285353
	0.52	0.284413	0.666699	0.826478		0.52	0.331311	0.776634	0.987075			0.0824591	0.0582304	0.0288633
	0.585	0.272029	0.729042	0.748099		0.585	0.316885	0.849257	0.893466			0.0740434	0.0550467	0.0358823
	0.65	0.314425	0.793833	0.669079		0.65	0.366272	0.924731	0.799091			0.0840005	0.0396415	0.037043
	0.715	0.329664	0.842271	0.554718		0.715	0.384024	0.981156	0.662508			0.0879131	0.0282339	0.0427848
	0.78	0.358592	0.854018	0.459036		0.78	0.417722	0.994841	0.548234			0.0886389	0.0264887	0.0480537
	0.845	0.379424	0.858447	0.408744		0.845	0.441989	1	0.488169			0.0855483	0.0267353	0.0469938
	0.91	0.414405	0.854825	0.378371		0.91	0.482739	0.99578	0.451894			0.0811442	0.0304689	0.0406514
	0.975	0.456197	0.841139	0.341844		0.975	0.531422	0.979839	0.40827			0.0787171	0.0337413	0.0442125
	1.04	0.414189	0.831154	0.324388		1.04	0.482486	0.968206	0.387422			0.0830247	0.0358207	0.0437725
	1.105	0.408323	0.813525	0.347635		1.105	0.475653	0.94767	0.415186			0.0796107	0.0353447	0.0439315
	1.17	0.398745	0.798004	0.358861		1.17	0.464496	0.92959	0.428593			0.0764004	0.050036	0.0442288
	1.235	0.354958	0.811207	0.361616		1.235	0.413489	0.944971	0.431884			0.0835463	0.038088	0.0437235
	1.3	0.3871	0.81152	0.383175		1.3	0.45093	0.945335	0.457632			0.0837987	0.042982	0.0450777
	1.365	0.431492	0.794347	0.428517		1.365	0.502643	0.925331	0.511785			0.0891096	0.0418733	0.0499692
	1.43	0.482405	0.80219	0.472197		1.43	0.561951	0.934467	0.563952			0.0896303	0.0365579	0.050239
	1.495	0.463491	0.748103	0.574799		1.495	0.539918	0.871461	0.686491			0.0940833	0.0416484	0.0467776
	1.56	0.45021	0.70319	0.661758		1.56	0.524447	0.819142	0.790347			0.093136	0.0399873	0.0477426
	1.625	0.416972	0.654901	0.719024		1.625	0.485728	0.762891	0.858741			0.0926714	0.0427936	0.038419
	1.69	0.407796	0.592249	0.789183		1.69	0.47504	0.689908	0.942533			0.0909212	0.0393885	0.036026
	1.755	0.431838	0.496241	0.8373		1.755	0.503046	0.578069	1			0.0933012	0.0375917	0.0339326
	1.82	0.388915	0.42138	0.827698		1.82	0.453045	0.490863	0.988533			0.0969117	0.0354413	0.035153
	1.885	0.39144	0.38252	0.759982		1.885	0.455986	0.445595	0.907658			0.0895672	0.0400175	0.0544262
	1.95	0.348055	0.340544	0.671432		1.95	0.405447	0.396698	0.801901			0.0879119	0.0357343	0.0446288
	2.015	0.353129	0.314393	0.59382		2.015	0.411359	0.366235	0.709209			0.0954557	0.035759	0.0498157
	2.08	0.403039	0.287426	0.487017		2.08	0.469498	0.334821	0.581651			0.0998535	0.0336358	0.0549412
	2.145	0.462938	0.278395	0.468754		2.145	0.539274	0.324301	0.55984			0.109419	0.0342663	0.0416498
	2.21	0.49568	0.237627	0.460552		2.21	0.577415	0.27681	0.550044			0.109423	0.0330935	0.0436718
	2.275	0.43419	0.224761	0.492823		2.275	0.505785	0.261823	0.588586			0.0839024	0.0359492	0.047148
	2.34	0.450447	0.156149	0.507262		2.34	0.524723	0.181897	0.605831			0.076308	0.038389	0.0582387
						Normalised		Max CEN	Max BubR1
	Average Values (BI2536)							0.892886	0.818826			SEM (STD/SQRT(N)
	Distance (microns)	BLM	CENPB-mCherry-RMI1	BubR1		Distance (microns)	BLM	CENPB-mCherry-RMI1	BubR1			BLM	CENPB-mCherry-RMI1	BubR1
	0	0.34219	0.354791	0.441515		0	0.383241	0.397354	0.539205			0.0395438	0.0498918	0.0475579
	0.065	0.362548	0.36947	0.467343		0.065	0.406041	0.413793	0.570747			0.0441684	0.046055	0.0475781
	0.13	0.374117	0.380424	0.507761		0.13	0.418998	0.426061	0.620109			0.0434826	0.0459083	0.0496667
	0.195	0.394554	0.397569	0.553148		0.195	0.441886	0.445264	0.675538			0.0436151	0.0446657	0.0498021
	0.26	0.392622	0.417668	0.602538		0.26	0.439723	0.467773	0.735855			0.0424017	0.0422327	0.0495828
	0.325	0.41275	0.440821	0.665221		0.325	0.462265	0.493704	0.812409			0.0426924	0.0398826	0.0472576
	0.39	0.442492	0.482186	0.748828		0.39	0.495575	0.540031	0.914514			0.0420498	0.0384566	0.0444764
	0.455	0.469765	0.511289	0.80726		0.455	0.52612	0.572626	0.985874			0.0389351	0.0400857	0.038138
	0.52	0.503749	0.57568	0.818826		0.52	0.564181	0.644741	1			0.0377734	0.0411453	0.0280393
	0.585	0.555052	0.637193	0.814871		0.585	0.621639	0.713633	0.995169			0.0399444	0.0401943	0.030265
	0.65	0.617352	0.694787	0.788973		0.65	0.691412	0.778137	0.963542			0.0398712	0.0314223	0.0376758
	0.715	0.674603	0.750277	0.731442		0.715	0.755531	0.840284	0.893282			0.0423046	0.0265798	0.0455893
	0.78	0.702463	0.818463	0.658721		0.78	0.786734	0.916649	0.80447			0.0425975	0.021533	0.0438028
	0.845	0.726412	0.85549	0.556857		0.845	0.813556	0.958119	0.680068			0.0382263	0.0231536	0.0402698
	0.91	0.742655	0.890767	0.492394		0.91	0.831747	0.997627	0.601342			0.0327827	0.0228286	0.0449121
	0.975	0.773672	0.892886	0.43918		0.975	0.866485	1	0.536353			0.0304394	0.020642	0.040647
	1.04	0.804659	0.888936	0.425136		1.04	0.901189	0.995577	0.519202			0.031005	0.0211514	0.0426735
	1.105	0.804471	0.884846	0.424973		1.105	0.900979	0.990996	0.519003			0.0315257	0.0199887	0.0401841
	1.17	0.77188	0.859965	0.425653		1.17	0.864478	0.96313	0.519833			0.0293886	0.0237987	0.0442666
	1.235	0.762224	0.849642	0.434456		1.235	0.853664	0.951569	0.530584			0.0273638	0.0247741	0.0484784
	1.3	0.767446	0.837152	0.43725		1.3	0.859512	0.937581	0.533996			0.0292336	0.0250643	0.0522837
	1.365	0.780793	0.832692	0.462556		1.365	0.874461	0.932585	0.564901			0.0326238	0.0311367	0.0542484
	1.43	0.78213	0.825033	0.501339		1.43	0.875958	0.924007	0.612266			0.038744	0.0367227	0.0509883
	1.495	0.75351	0.808083	0.520049		1.495	0.843904	0.905024	0.635115			0.0417068	0.0382982	0.0519812
	1.56	0.712547	0.773424	0.553716		1.56	0.798027	0.866208	0.676232			0.0454006	0.0414525	0.0549856
	1.625	0.675322	0.741844	0.607644		1.625	0.756336	0.830839	0.742092			0.0511057	0.0478463	0.0559439
	1.69	0.636299	0.686596	0.646858		1.69	0.712632	0.768963	0.789982			0.0540564	0.0531564	0.0527638
	1.755	0.595439	0.648602	0.679497		1.755	0.666871	0.726411	0.829844			0.0576725	0.0554321	0.0468504
	1.82	0.556249	0.596066	0.685466		1.82	0.622979	0.667572	0.837133			0.0553542	0.0546422	0.0461883
	1.885	0.517725	0.565542	0.677489		1.885	0.579833	0.633387	0.827391			0.0540547	0.0537412	0.0525608
	1.95	0.468798	0.511325	0.637366		1.95	0.525037	0.572666	0.77839			0.0538312	0.0515284	0.0565173
	2.015	0.429146	0.469042	0.574871		2.015	0.480628	0.52531	0.702068			0.0498841	0.0508427	0.0570196
	2.08	0.415799	0.451954	0.568808		2.08	0.46568	0.506172	0.694663			0.0403383	0.0447655	0.0488815
	2.145	0.390868	0.419751	0.510144		2.145	0.437758	0.470107	0.623019			0.0345353	0.0407784	0.0478646
	2.21	0.386847	0.412413	0.483963		2.21	0.433255	0.461888	0.591045			0.0330969	0.0387613	0.0505704
	2.275	0.391142	0.422489	0.462222		2.275	0.438065	0.473173	0.564494			0.0327308	0.0357946	0.0482409
	2.34	0.38994	0.370196	0.466112		2.34	0.436719	0.414607	0.569244			0.0350683	0.036626	0.0542527
						Normalised		Max CEN	Max BubR1
	Average Values (RO3306)							0.865674	0.781633			SEM (STD/SQRT(N)
	Distance (microns)	BLM	CENPB-mCherry-RMI1	BubR1		Distance (microns)	BLM	CENPB-mCherry-RMI1	BubR1			BLM	CENPB-mCherry-RMI1	BubR1
	0	0.354324	0.407877	0.475127		0	0.409304	0.471166	0.607865			0.0589196	0.0355305	0.0605331
	0.065	0.368602	0.428029	0.523778		0.065	0.425798	0.494446	0.670107			0.057825	0.0369852	0.0591803
	0.13	0.369954	0.445883	0.575883		0.13	0.42736	0.51507	0.736769			0.0566983	0.0387868	0.0627052
	0.195	0.373273	0.476971	0.636971		0.195	0.431193	0.550982	0.814924			0.0548118	0.0350917	0.0595888
	0.26	0.409445	0.493123	0.74052		0.26	0.472978	0.56964	0.947402			0.0533012	0.0319006	0.0614504
	0.325	0.444592	0.555646	0.764376		0.325	0.513579	0.641866	0.977922			0.0508645	0.0314155	0.05828
	0.39	0.497211	0.609851	0.781633		0.39	0.574363	0.704481	1			0.0531167	0.0325265	0.0484135
	0.455	0.57082	0.668732	0.728057		0.455	0.659394	0.772499	0.931457			0.0516178	0.0311713	0.0442367
	0.52	0.597338	0.736211	0.629275		0.52	0.690027	0.850448	0.805078			0.0491647	0.0279058	0.0442539
	0.585	0.639193	0.787713	0.535838		0.585	0.738376	0.909942	0.685537			0.0454587	0.0265941	0.0440352
	0.65	0.669712	0.835555	0.456266		0.65	0.77363	0.965207	0.583734			0.0442146	0.0245618	0.043026
	0.715	0.705607	0.852944	0.402466		0.715	0.815095	0.985295	0.514905			0.0430881	0.0232956	0.0458481
	0.78	0.718886	0.865674	0.337875		0.78	0.830435	1	0.432269			0.0398004	0.0239176	0.0466852
	0.845	0.746835	0.8532	0.325388		0.845	0.86272	0.985591	0.416292			0.0374057	0.0212419	0.0463035
	0.91	0.779367	0.84577	0.318255		0.91	0.900301	0.977008	0.407167			0.038066	0.0190719	0.0457997
	0.975	0.783184	0.837032	0.298274		0.975	0.90471	0.966914	0.381604			0.0372617	0.0192862	0.0446053
	1.04	0.7629	0.844857	0.280732		1.04	0.881278	0.975953	0.35916			0.041111	0.0223495	0.0430892
	1.105	0.745131	0.832014	0.311079		1.105	0.860753	0.961116	0.397986			0.0411434	0.0217004	0.0438791
	1.17	0.709029	0.83261	0.289347		1.17	0.819048	0.961805	0.370183			0.0393291	0.0246468	0.0463796
	1.235	0.70218	0.834986	0.325802		1.235	0.811137	0.96455	0.416822			0.0368304	0.0266774	0.0429706
	1.3	0.704324	0.839569	0.333839		1.3	0.813613	0.969844	0.427105			0.0426366	0.0285521	0.0444549
	1.365	0.670711	0.834495	0.399834		1.365	0.774785	0.963982	0.511537			0.0537606	0.0285336	0.045295
	1.43	0.632226	0.807841	0.474383		1.43	0.730328	0.933193	0.606913			0.0592699	0.0362339	0.0474815
	1.495	0.5997	0.782741	0.523729		1.495	0.692755	0.904198	0.670044			0.0585335	0.0386675	0.0559965
	1.56	0.559883	0.757589	0.568475		1.56	0.64676	0.875143	0.727292			0.0577424	0.0426091	0.0582111
	1.625	0.501394	0.727119	0.62392		1.625	0.579194	0.839945	0.798226			0.0563088	0.0437948	0.0579352
	1.69	0.456747	0.676634	0.685643		1.69	0.52762	0.781627	0.877193			0.0581969	0.0431141	0.0539936
	1.755	0.425556	0.620872	0.680021		1.755	0.49159	0.717212	0.87			0.0607618	0.0446393	0.0468861
	1.82	0.394756	0.583699	0.675675		1.82	0.45601	0.674271	0.86444			0.063123	0.0461711	0.0392604
	1.885	0.384777	0.548626	0.63477		1.885	0.444483	0.633756	0.812108			0.0623386	0.0461451	0.0465933
	1.95	0.403294	0.507932	0.597186		1.95	0.465873	0.586748	0.764023			0.0615342	0.0444563	0.0600638
	2.015	0.395813	0.48063	0.566624		2.015	0.457231	0.555209	0.724923			0.0623471	0.040978	0.0627067
	2.08	0.397452	0.468203	0.555007		2.08	0.459125	0.540853	0.710061			0.0659016	0.0408249	0.0681927
	2.145	0.371504	0.487891	0.57848		2.145	0.42915	0.563597	0.740091			0.0689663	0.0358636	0.0745903
	2.21	0.326836	0.463643	0.518339		2.21	0.377551	0.535586	0.663149			0.0627975	0.0280849	0.0724008
	2.275	0.318884	0.430186	0.515534		2.275	0.368365	0.496937	0.659561			0.0608157	0.0288297	0.0616964
	2.34	0.353049	0.414159	0.485837		2.34	0.407831	0.478424	0.621566			0.0676342	0.0305789	0.0664203
						Normalised		Max CEN	Max BubR1
	Average Values (AZD1152)							0.875561	0.86784			SEM (STD/SQRT(N)
	Distance (microns)	BLM	CENPB-mCherry-RMI1	BubR1		Distance (microns)	BLM	CENPB-mCherry-RMI1	BubR1			BLM	CENPB-mCherry-RMI1	BubR1
	0	0.444868	0.421663	0.612374		0	0.508095	0.481591	0.70563			0.0466678	0.0427957	0.0373661
	0.065	0.441799	0.425994	0.599124		0.065	0.50459	0.486538	0.690363			0.0471093	0.0429727	0.0333552
	0.13	0.46724	0.441094	0.670466		0.13	0.533647	0.503784	0.772569			0.0487021	0.0420234	0.0292217
	0.195	0.462084	0.462849	0.709743		0.195	0.527758	0.528631	0.817827			0.050029	0.0412103	0.0300544
	0.26	0.487136	0.510259	0.768669		0.26	0.55637	0.582779	0.885727			0.0522966	0.0371402	0.0298954
	0.325	0.516318	0.548086	0.861538		0.325	0.5897	0.625982	0.992739			0.0522191	0.034147	0.0273664
	0.39	0.54154	0.600605	0.86784		0.39	0.618506	0.685966	1			0.0519418	0.0288957	0.0226508
	0.455	0.558574	0.659374	0.846118		0.455	0.637962	0.753087	0.97497			0.0503481	0.0280715	0.0251012
	0.52	0.586759	0.698967	0.78317		0.52	0.670152	0.798308	0.902436			0.0480082	0.0309844	0.0301689
	0.585	0.62357	0.74073	0.71072		0.585	0.712195	0.846007	0.818953			0.0433346	0.0303254	0.0364229
	0.65	0.653524	0.788288	0.635772		0.65	0.746406	0.900323	0.732591			0.0438694	0.0260948	0.0397698
	0.715	0.697557	0.815778	0.563954		0.715	0.796697	0.93172	0.649836			0.0491924	0.0238726	0.0394326
	0.78	0.705554	0.8484	0.541153		0.78	0.805831	0.968979	0.623563			0.0517251	0.0237688	0.0397488
	0.845	0.715333	0.869355	0.518805		0.845	0.816999	0.992911	0.597813			0.0468962	0.0210086	0.0403818
	0.91	0.737004	0.875561	0.504649		0.91	0.841751	1	0.581501			0.050007	0.0198843	0.040552
	0.975	0.736752	0.872112	0.49872		0.975	0.841462	0.99606	0.574669			0.0505909	0.0200098	0.0431115
	1.04	0.756686	0.872936	0.485508		1.04	0.86423	0.997001	0.559444			0.0477926	0.0210118	0.0470098
	1.105	0.765738	0.860068	0.480219		1.105	0.874568	0.982305	0.55335			0.0429236	0.0204817	0.0472908
	1.17	0.751775	0.853158	0.505068		1.17	0.858621	0.974413	0.581983			0.0363401	0.024159	0.0456592
	1.235	0.737474	0.843115	0.512588		1.235	0.842288	0.962943	0.590648			0.0409104	0.0237346	0.0469587
	1.3	0.727908	0.839401	0.555814		1.3	0.831362	0.958701	0.640457			0.040752	0.0267312	0.0497972
	1.365	0.713971	0.837113	0.584916		1.365	0.815443	0.956088	0.673991			0.0450748	0.0321674	0.0534559
	1.43	0.725151	0.83209	0.606737		1.43	0.828212	0.950351	0.699135			0.0467122	0.0360354	0.0529006
	1.495	0.693936	0.7882	0.636018		1.495	0.792561	0.900223	0.732875			0.0506533	0.0367932	0.0526867
	1.56	0.655747	0.774166	0.65051		1.56	0.748944	0.884194	0.749574			0.0534953	0.0400616	0.0512613
	1.625	0.632163	0.716939	0.69521		1.625	0.722009	0.818834	0.801081			0.0566595	0.0407169	0.0440715
	1.69	0.611098	0.660959	0.718954		1.69	0.697951	0.754898	0.828441			0.0607048	0.0393212	0.0461966
	1.755	0.579605	0.610068	0.748089		1.755	0.661981	0.696774	0.862013			0.0592139	0.0358662	0.0431162
	1.82	0.556202	0.566545	0.754089		1.82	0.635252	0.647065	0.868926			0.0584004	0.0342447	0.0445427
	1.885	0.519896	0.505418	0.75531		1.885	0.593786	0.57725	0.870334			0.0561761	0.0342925	0.0499138
	1.95	0.512764	0.464858	0.704228		1.95	0.58564	0.530926	0.811472			0.0545269	0.025674	0.0507852
	2.015	0.514984	0.415936	0.664294		2.015	0.588176	0.475051	0.765457			0.0547807	0.0225435	0.0506003
	2.08	0.527728	0.403679	0.608012		2.08	0.602732	0.461051	0.700604			0.0642958	0.0223838	0.0451212
	2.145	0.550131	0.368392	0.578693		2.145	0.628318	0.42075	0.66682			0.0723999	0.027096	0.0427042
	2.21	0.492481	0.352608	0.537556		2.21	0.562475	0.402722	0.619419			0.0754127	0.0259019	0.0455808
	2.275	0.442337	0.303559	0.520142		2.275	0.505204	0.346702	0.599353			0.0723856	0.0161239	0.04657
	2.34	0.369311	0.279241	0.513606		2.34	0.421799	0.318928	0.591821			0.0582173	0.0170371	0.040222

## Sheet: Raw Data
	FIJI: Analyze>Plot profile(CMD-K)>List		Excel: Background correction (minus minimun value)>Normalise (Relative to maximum value)
	BI2536							Untreated							RO3306							AZD1152
	HeLa_tetCENPBmCRMI1_STB-MG132_+Dox_BI2536_BLM-RFP-BubR1-06.czi							HeLa_tetCENPBmCRMI1_STB-MG132_+Dox_BLM-RFP-BubR1-03.czi							HeLa_tetCENPBmCRMI1_STB-MG132_+Dox_RO3306_BLM-RFP-BubR1-06.czi							HeLa_tetCENPBmCRMI1_STB-MG132_+Dox_AZD1152_BLM-RFP-BubR1-06.czi
		BLM		CENPB-mCherry-RMI1		BubR1			BLM		CENPB-mCherry-RMI1		BubR1			BLM		CENPB-mCherry-RMI1		BubR1			BLM		CENPB-mCherry-RMI1		BubR1
	Distance (microns)	Gray Value	Distance (microns)	Gray Value	Distance (microns)	Gray Value		Distance (microns)	Gray Value	Distance (microns)	Gray Value	Distance (microns)	Gray Value		Distance (microns)	Gray Value	Distance (microns)	Gray Value	Distance (microns)	Gray Value		Distance (microns)	Gray Value	Distance (microns)	Gray Value	Distance (microns)	Gray Value
	0	11601	0	4879	0	3377		0	12776	0	4706	0	3628		0	14690.5	0	2915.5	0	3061		0	10787	0	2098	0	3035.5
	0.065	11788.4	0.065	4997.29	0.065	3446.71		0.065	12409.8	0.065	4754.61	0.065	3934.45		0.065	15145.8	0.065	2908.66	0.065	3185.23		0.065	10754.5	0.065	2081.87	0.065	2964.78
	0.13	11926.9	0.13	4986.29	0.13	3458.24		0.13	12621.3	0.13	5065.97	0.13	3880.97		0.13	15744.1	0.13	2869.73	0.13	3358.69		0.13	10854.4	0.13	2126.38	0.13	3114.9
	0.195	11266.1	0.195	5146.29	0.195	3461.76		0.195	13330.2	0.195	5183.58	0.195	4043.84		0.195	16463.8	0.195	2985.44	0.195	3488.35		0.195	10907.7	0.195	2231.27	0.195	3238.67
	0.26	10927.9	0.26	5087.24	0.26	3568.94		0.26	13877.3	0.26	5399.36	0.26	4038.15		0.26	16929.3	0.26	3183.4	0.26	3665.15		0.26	10739.8	0.26	2279.86	0.26	3321.08
	0.325	10844.7	0.325	5325.53	0.325	3555.18		0.325	14314.8	0.325	5615.7	0.325	4098.31		0.325	17145.8	0.325	3233.86	0.325	3647.28		0.325	10848.1	0.325	2277.35	0.325	3382.4
	0.39	11419.5	0.39	5333.88	0.39	3597.06		0.39	14359	0.39	5811.73	0.39	3990.19		0.39	17222.4	0.39	3299.29	0.39	3457.85		0.39	10876.2	0.39	2324.69	0.39	3331.71
	0.455	11061.2	0.455	5456.47	0.455	3745.47		0.455	13630.6	0.455	5932.01	0.455	3877.19		0.455	17203.6	0.455	3496.72	0.455	3256.23		0.455	11049.5	0.455	2457.07	0.455	3301.89
	0.52	11286.9	0.52	5532.35	0.52	4050.76		0.52	12745.5	0.52	6025.26	0.52	3874.12		0.52	17177.5	0.52	3617.76	0.52	3073.81		0.52	11239.9	0.52	2459.8	0.52	3275.99
	0.585	11233.1	0.585	5626.41	0.585	4425.53		0.585	12405.7	0.585	6166.47	0.585	3840.17		0.585	17473.3	0.585	3710.45	0.585	2893.35		0.585	11589.8	0.585	2477.12	0.585	3278.47
	0.65	11818.5	0.65	5714.35	0.65	4358.88		0.65	12503.8	0.65	6144.75	0.65	3843.82		0.65	17886.9	0.65	3693.23	0.65	2809.11		0.65	11869.2	0.65	2510.37	0.65	3278.68
	0.715	12752.4	0.715	5806.94	0.715	4492		0.715	12650	0.715	6020	0.715	3809.67		0.715	18549.9	0.715	3837.35	0.715	2780.48		0.715	12106	0.715	2631.64	0.715	3161.43
	0.78	13200.2	0.78	6183	0.78	4283.18		0.78	13110.2	0.78	6133.52	0.78	3733.01		0.78	19281.7	0.78	3920.45	0.78	2712.15		0.78	12569.9	0.78	2814.15	0.78	3172.96
	0.845	13516.9	0.845	6403	0.845	4053.82		0.845	13291.5	0.845	6098.82	0.845	3708.98		0.845	19731.4	0.845	3842.36	0.845	2743.29		0.845	12521.9	0.845	2788.8	0.845	3154.82
	0.91	13889.8	0.91	6468.82	0.91	3939.47		0.91	13260	0.91	6344.93	0.91	3680.43		0.91	19787.3	0.91	3799.87	0.91	2772.29		0.91	12611.8	0.91	2894.6	0.91	3109.53
	0.975	15081.1	0.975	6606.88	0.975	3667.29		0.975	13340.9	0.975	6282	0.975	3732.32		0.975	19442.6	0.975	3672.27	0.975	2890.51		0.975	12207.5	0.975	2816.61	0.975	2938.39
	1.04	15860.7	1.04	6689.41	1.04	3771		1.04	13297.8	1.04	6066.67	1.04	3698.36		1.04	19034.3	1.04	3689.06	1.04	2991.58		1.04	11848.1	1.04	3169	1.04	2974.24
	1.105	16280	1.105	6571	1.105	3703		1.105	13129.9	1.105	6085.44	1.105	3675.04		1.105	18374.4	1.105	3701.74	1.105	3058.3		1.105	11770.9	1.105	2967.84	1.105	2905.63
	1.17	15697.8	1.17	6382.53	1.17	4008		1.17	13111.4	1.17	5955.87	1.17	3777.15		1.17	17685.2	1.17	3601.52	1.17	3258		1.17	12005	1.17	2948.85	1.17	2908.97
	1.235	14854.2	1.235	5944.35	1.235	4205.41		1.235	12540.9	1.235	5976.37	1.235	3783.8		1.235	17013.3	1.235	3475.73	1.235	3393.38		1.235	12318.9	1.235	2911.98	1.235	2908.48
	1.3	13493.7	1.3	5634.12	1.3	4449.18		1.3	13093.2	1.3	5834.25	1.3	3841.78		1.3	16249.8	1.3	3363.13	1.3	3425.21		1.3	12467.1	1.3	2911.86	1.3	2948.11
	1.365	12527.8	1.365	5237.88	1.365	4512.41		1.365	12926.5	1.365	5717.17	1.365	3978.81		1.365	15621	1.365	3269.56	1.365	3452.06		1.365	12433.1	1.365	2876.54	1.365	2944.52
	1.43	11638.3	1.43	4925.41	1.43	4057.76		1.43	13153.7	1.43	5623	1.43	3916.67		1.43	15045.2	1.43	3141.31	1.43	3488.18		1.43	12562.9	1.43	2897.76	1.43	2953.55
	1.495	10981.8	1.495	4658.53	1.495	3648.94		1.495	13514.3	1.495	5456.31	1.495	4035.35		1.495	14814.8	1.495	2975.41	1.495	3430.07		1.495	12423.8	1.495	2991.76	1.495	2973.35
	1.56	10301.9	1.56	4533.94	1.56	3183.29		1.56	13789.1	1.56	5343.58	1.56	4151.57		1.56	14572.9	1.56	2860.74	1.56	3338.95		1.56	12089.1	1.56	3070	1.56	3029.08
	1.625	9733.18	1.625	4370.35	1.625	2971		1.625	13835.9	1.625	5243.66	1.625	4132.89		1.625	14110.5	1.625	2784.85	1.625	3268.5		1.625	11630.1	1.625	2969.1	1.625	3199.51
	1.69	9840.82	1.69	4346.06	1.69	3061.06		1.69	13836.5	1.69	5109	1.69	4222.98		1.69	14013.4	1.69	2723.84	1.69	3100.79		1.69	11610	1.69	2977.41	1.69	3379.96
	1.755	9502.65	1.755	4166	1.755	2787.06		1.755	13837.2	1.755	4992.76	1.755	4212.82		1.755	14037.4	1.755	2723.61	1.755	2944.2		1.755	11504.2	1.755	2862.89	1.755	3320
	1.82	9337.59	1.82	4143	1.82	2783.29		1.82	13785.5	1.82	4957	1.82	4073.41		1.82	13789.6	1.82	2678.02	1.82	2824.56		1.82	11586.5	1.82	2849.07	1.82	3360.79
	1.885	8932.53	1.885	4094.94	1.885	2810.29		1.885	13872.8	1.885	4915.11	1.885	4131.68		1.885	13613.8	1.885	2664.04	1.885	2665.27		1.885	11765.2	1.885	2861.72	1.885	3387.43
	1.95	8999.53	1.95	4085	1.95	2764		1.95	13953.4	1.95	4941.21	1.95	4023.9		1.95	13753.5	1.95	2734.92	1.95	2494.65		1.95	11832.4	1.95	2689.71	1.95	3222.58
	2.015	8992.88	2.015	4030.35	2.015	2775.76		2.015	14241.5	2.015	4803.69	2.015	4117.27		2.015	14023.5	2.015	2773.5	2.015	2446.25		2.015	11686.4	2.015	2632.78	2.015	3070.89
	2.08	8931.35	2.08	3873.06	2.08	2767.29		2.08	14484.1	2.08	4781.54	2.08	4015.89									2.08	11465.6	2.08	2680.75	2.08	2986.4
	2.145	8714	2.145	3880.47	2.145	2763.35		2.145	14855	2.145	4703	2.145	3842		0	13430	0	2569.5	0	2659		2.145	11296.4	2.145	2674.73	2.145	3011.28
	2.21	8321	2.21	3832	2.21	2729									0.065	13623.4	0.065	2571.94	0.065	2749.18		2.21	10929	2.21	2507.4	2.21	3025.31
								0	14166	0	4614	0	4041		0.13	13612.9	0.13	2615.18	0.13	2952.15
	0	9153	0	4242	0	2631		0.065	13643.3	0.065	4706.09	0.065	3850.3		0.195	13653.4	0.195	2685.09	0.195	2980.55		0	12398	0	2582	0	3334
	0.065	9348.72	0.065	4225.92	0.065	2690.79		0.13	13466.4	0.13	4730.87	0.13	4063.88		0.26	14104.4	0.26	2673.98	0.26	3218.2		0.065	12325.2	0.065	2561.99	0.065	3482
	0.13	9514.52	0.13	4248.14	0.13	2714.12		0.195	13097.8	0.195	4719.47	0.195	4061.02		0.325	14518	0.325	2801.97	0.325	3210.09		0.13	12305.8	0.13	2629.88	0.13	3586.52
	0.195	9616.14	0.195	4310.28	0.195	2768.36		0.26	13491.6	0.26	4782.64	0.26	4100.73		0.39	15137.1	0.39	2986	0.39	3211.09		0.195	12195.2	0.195	2603.64	0.195	3650.6
	0.26	9647.74	0.26	4260.4	0.26	2869.28		0.325	13306.4	0.325	4873.82	0.325	4201.2		0.455	15573.9	0.455	3097.48	0.455	3095.39		0.26	12261.4	0.26	2684.06	0.26	3801.71
	0.325	9673.17	0.325	4227.92	0.325	3151.28		0.39	13138.6	0.39	4876.28	0.39	4429.81		0.52	15845.1	0.52	3293.83	0.52	3127.85		0.325	12602.7	0.325	2775.55	0.325	3946.57
	0.39	9864.33	0.39	4446.72	0.39	3406.11		0.455	13222.6	0.455	4946.6	0.455	4495.8		0.585	15895.3	0.585	3275.91	0.585	2979.09		0.39	12723.3	0.39	2724.91	0.39	4029.26
	0.455	10128.2	0.455	4638.42	0.455	3787.28		0.52	13144.6	0.52	5005.21	0.52	4759.79		0.65	15952.2	0.65	3505.35	0.65	2870.92		0.455	12725.8	0.455	2804.99	0.455	4062.27
	0.52	10576.1	0.52	4963.38	0.52	4173.11		0.585	13272.2	0.585	5219.87	0.585	4903.67		0.715	16059.3	0.715	3406.67	0.715	2857.67		0.52	12492.4	0.52	2870.14	0.52	4012.77
	0.585	11437.8	0.585	5264.12	0.585	4242.12		0.65	13077.1	0.65	5340.63	0.65	4792.65		0.78	16814.3	0.78	3254.68	0.78	2788.36		0.585	12599.6	0.585	2804.07	0.585	3857.79
	0.65	12406.3	0.65	5516.32	0.65	4196.36		0.715	13221	0.715	5410.68	0.715	4725.54		0.845	17748.4	0.845	3224.97	0.845	2716.12		0.65	12418.4	0.65	2772.58	0.65	3651.09
	0.715	13945.5	0.715	6195.98	0.715	4010.43		0.78	13313.3	0.78	5314.28	0.78	4385.09		0.91	19025.1	0.91	3217.47	0.91	2637.85		0.715	12459.2	0.715	2872.74	0.715	3603.96
	0.78	15403.3	0.78	6512	0.78	3687.22		0.845	13479.4	0.845	5441.11	0.845	4160.55		0.975	20071.5	0.975	3275.45	0.975	2610.55		0.78	12386.3	0.78	2903.42	0.78	3470.16
	0.845	16505.2	0.845	6728.34	0.845	3502.47		0.91	13542.8	0.91	5390.8	0.91	4064.4		1.04	19853.5	1.04	3186.35	1.04	2526.56		0.845	12339.5	0.845	2883.68	0.845	3392.43
	0.91	16891.1	0.91	6882.4	0.91	3380.54		0.975	13742.3	0.975	5300.9	0.975	3880.65		1.105	19086.8	1.105	3276.03	1.105	2731.39		0.91	12487.8	0.91	2796.41	0.91	3389.43
	0.975	16831	0.975	7027.21	0.975	3277.21		1.04	13898.3	1.04	5319.85	1.04	3917		1.17	18020.3	1.17	3320.05	1.17	2583.27		0.975	12456.4	0.975	2789.68	0.975	3305.86
	1.04	16222	1.04	6869.78	1.04	3397.67		1.105	14001.3	1.105	5323.49	1.105	3961.22		1.235	17000.6	1.235	3397.27	1.235	2579.7		1.04	12400.3	1.04	2697.84	1.04	3146.57
	1.105	15573.7	1.105	6489.67	1.105	3413.76		1.17	14064.9	1.17	5358.45	1.17	3899.71		1.3	16078.9	1.3	3565.83	1.3	2650.56		1.105	12531.7	1.105	2743.09	1.105	3167.94
	1.17	14880.5	1.17	6351	1.17	3519.5		1.235	14175.6	1.235	5504.66	1.235	3912.87		1.365	15504.6	1.365	3473.91	1.365	2647.55		1.17	12900.4	1.17	2778.04	1.17	3256.74
	1.235	13924.8	1.235	6175.99	1.235	3626.85		1.3	14760.3	1.3	5657.61	1.3	3907.92		1.43	15214.7	1.43	3470.83	1.43	2618		1.235	13112.7	1.235	2720.61	1.235	3326.38
	1.3	13309.1	1.3	6135.05	1.3	3695.12		1.365	15359.2	1.365	5671	1.365	3870.4		1.495	14775.5	1.495	3599.42	1.495	2564		1.3	12909.1	1.3	2748.52	1.3	3531.97
	1.365	12538	1.365	5922.57	1.365	3957.36		1.43	15992.9	1.43	5657.5	1.43	3979.14		1.56	14754.3	1.56	3488.27	1.56	2589.59		1.365	12760.5	1.365	2770.3	1.365	3768.62
	1.43	11988.2	1.43	5814.82	1.43	4174.4		1.495	15816.9	1.495	5731.36	1.495	4107.62		1.625	14771.3	1.625	3500.7	1.625	2739.76		1.43	12677	1.43	2712.32	1.43	3921.48
	1.495	11472.9	1.495	5589.06	1.495	4433.72		1.56	15308.2	1.56	5671.35	1.56	4330.77		1.69	14749.5	1.69	3287.71	1.69	2949.65		1.495	12602.4	1.495	2631.96	1.495	3953.17
	1.56	11231	1.56	5364.44	1.56	4624.78		1.625	14851.3	1.625	5438.29	1.625	4397.14		1.755	14747.9	1.755	3123.45	1.755	2838.18		1.56	12524	1.56	2718	1.56	3977.26
	1.625	10882.8	1.625	5134.01	1.625	4805.08		1.69	14629	1.69	5385.09	1.69	4513.56		1.82	14600.7	1.82	2938.17	1.82	3050.7		1.625	12581.2	1.625	2776.54	1.625	4156.58
	1.69	11059.6	1.69	5002.78	1.69	5100.28		1.755	14078.6	1.755	5253.76	1.755	4728.96		1.885	14862.6	1.885	2781.33	1.885	2937.3		1.69	12597.3	1.69	2664.17	1.69	4355.29
	1.755	11017	1.755	5036.75	1.755	4775.62		1.82	13641.4	1.82	5038	1.82	4888.8		1.95	14564.2	1.95	2673.95	1.95	3033.55		1.755	12705.2	1.755	2559.56	1.755	4404.11
	1.82	10842	1.82	4950.6	1.82	4521.49		1.885	13455.3	1.885	4982.86	1.885	4975.09		2.015	14484.3	2.015	2472.97	2.015	2760		1.82	12893.8	1.82	2494.97	1.82	4406.97
	1.885	10695.4	1.885	4794.15	1.885	4311.88		1.95	13197.2	1.95	4983.22	1.95	4692.08		2.08	14078	2.08	2534.94	2.08	2817.68		1.885	12708.4	1.885	2450.57	1.885	4438.52
	1.95	10548.1	1.95	4668.61	1.95	4027.89		2.015	13212.2	2.015	5026.25	2.015	4579.55		2.145	13520	2.145	2628	2.145	2698		1.95	12486.9	1.95	2415.58	1.95	4346.74
	2.015	10627.1	2.015	4565.42	2.015	3817.89		2.08	13238.5	2.08	4869.27	2.08	4314.04									2.015	12663.9	2.015	2335.58	2.015	4104.58
	2.08	10671.3	2.08	4533.83	2.08	3639.38		2.145	13656.2	2.145	4844.73	2.145	4111.47		0	13826	0	2711	0	2782.5		2.08	12864	2.08	2419.57	2.08	3822.79
	2.145	10506.7	2.145	4572.57	2.145	3632.49		2.21	13836.6	2.21	4908.74	2.21	4242.3		0.065	13704.1	0.065	2756.99	0.065	2779.61		2.145	13188.1	2.145	2468.84	2.145	3949.41
	2.21	10399.2	2.21	4620.7	2.21	3630.36		2.275	13598	2.275	5009	2.275	4118		0.13	13553.3	0.13	2834.95	0.13	2766.05		2.21	13255.7	2.21	2425.28	2.21	3944.9
	2.275	10098	2.275	4588.05	2.275	3644.18									0.195	13546.6	0.195	2776.17	0.195	2802.72		2.275	13389.8	2.275	2334.43	2.275	3794.53
	2.34	9905	2.34	4494	2.34	3533		0	12460	0	4785	0	3678		0.26	13710.9	0.26	2760.69	0.26	2914.41
								0.065	12538.2	0.065	4813.92	0.065	3653.34		0.325	13798	0.325	2836.25	0.325	2996.14		0	12708.1	0	2710.08	0	3804.42
	0	11917	0	5432	0	3141		0.13	12970	0.13	4832.42	0.13	3620.71		0.39	13925.5	0.39	2814.17	0.39	2913.34		0.065	12905.1	0.065	2802.01	0.065	3963.39
	0.065	11896.6	0.065	5399.94	0.065	3148.98		0.195	13140.5	0.195	4875.11	0.195	3685.5		0.455	14390.7	0.455	2932.89	0.455	2853.38		0.13	13232.1	0.13	2833.06	0.13	4104.51
	0.13	12018.7	0.13	5605.41	0.13	3205.19		0.26	13343.3	0.26	4857.51	0.26	3931.6		0.52	14726	0.52	3110.28	0.52	2749.34		0.195	13619.1	0.195	2870.29	0.195	4263.87
	0.195	12255.5	0.195	5926.67	0.195	3355.67		0.325	13562.4	0.325	4993.08	0.325	3925.12		0.585	15034.4	0.585	3147.6	0.585	2663.25		0.26	13621.6	0.26	2908.35	0.26	4455.9
	0.26	12457.4	0.26	6228.07	0.26	3317.7		0.39	13920	0.39	5026.5	0.39	4032.47		0.65	15522.8	0.65	3213.75	0.65	2551.97		0.325	13495.1	0.325	3009.71	0.325	4519.19
	0.325	13272.1	0.325	6524.13	0.325	3465.91		0.455	13776.7	0.455	5235.96	0.455	4200.16		0.715	15789.2	0.715	3207.61	0.715	2572.18		0.39	13755.5	0.39	3201.51	0.39	4486.95
	0.39	13940.7	0.39	6959.33	0.39	3624.67		0.52	13665.1	0.52	5387.26	0.52	4477.03		0.78	16103.6	0.78	3197.93	0.78	2528.53		0.455	13937.9	0.455	3318.7	0.455	4322.43
	0.455	14973.2	0.455	7569.17	0.455	3751.31		0.585	13452.6	0.585	5522.58	0.585	4641.29		0.845	16118.8	0.845	3166.99	0.845	2537.76		0.52	14130.6	0.52	3387.09	0.52	4136.72
	0.52	16115.9	0.52	8005.19	0.52	4092.48		0.65	13061.2	0.65	5563.59	0.65	4702.14		0.91	16152.7	0.91	3292.43	0.91	2553.61		0.585	14431.5	0.585	3530.01	0.585	4118.08
	0.585	17321.5	0.585	8407	0.585	4289		0.715	12674.4	0.715	5576.27	0.715	4732.29		0.975	15828.3	0.975	3364.22	0.975	2532.75		0.65	14691	0.65	3582.44	0.65	4124.78
	0.65	18629.1	0.65	8723.59	0.65	4479.15		0.78	12849.6	0.78	5446.92	0.78	4569.91		1.04	15466.4	1.04	3492.51	1.04	2605.39		0.715	15052.3	0.715	3569.09	0.715	4121.93
	0.715	19543.3	0.715	9086.52	0.715	4569.87		0.845	12542	0.845	5335.02	0.845	4302.39		1.105	15634.5	1.105	3426	1.105	2556.75		0.78	15511.3	0.78	3663.57	0.78	4090.63
	0.78	19870.7	0.78	9549.33	0.78	4486.33		0.91	12385.9	0.91	5254.04	0.91	4035.48		1.17	15421	1.17	3458.5	1.17	2478.53		0.845	15927.5	0.845	3772.05	0.845	3996.11
	0.845	19543.1	0.845	9875.94	0.845	4224.37		0.975	12307.1	0.975	5140.73	0.975	3891.65		1.235	15248.1	1.235	3495.41	1.235	2462.27		0.91	16097.2	0.91	3763.15	0.91	4003.48
	0.91	19500.6	0.91	10099.1	0.91	4082.96		1.04	12013.8	1.04	5125.26	1.04	3945.8		1.3	15051.4	1.3	3410.99	1.3	2492.14		0.975	16201.6	0.975	3660.51	0.975	4003.76
	0.975	19481.2	0.975	10122.5	0.975	3959.83		1.105	11788.9	1.105	5007.98	1.105	3795.75		1.365	14505.4	1.365	3235.15	1.365	2507.49		1.04	16256.1	1.04	3637.82	1.04	4074.13
	1.04	20320.6	1.04	10334.2	1.04	3799.11		1.17	12021.9	1.17	5033.46	1.17	3882.55		1.43	14590.8	1.43	3170.31	1.43	2607.44		1.105	16220.9	1.105	3622.61	1.105	4222.16
	1.105	21146.8	1.105	10583	1.105	3718.19		1.235	11955.4	1.235	4921.91	1.235	3927.69		1.495	14691	1.495	3049.39	1.495	2637.01		1.17	16441.2	1.17	3542.88	1.17	4240.48
	1.17	21143	1.17	10518	1.17	3744		1.3	12631.1	1.3	5026.08	1.3	3802.41		1.56	14821	1.56	3063.03	1.56	2775.16		1.235	16772.3	1.235	3528.24	1.235	4234.27
	1.235	21196.4	1.235	10531.9	1.235	3705.78		1.365	12291.2	1.365	5000.88	1.365	4111.72		1.625	14818.3	1.625	3054.98	1.625	2716.39		1.3	17090.3	1.3	3568.33	1.3	4385.5
	1.3	21365.8	1.3	10223.7	1.3	3668.37		1.43	11937.3	1.43	4986.94	1.43	4245.97		1.69	15322.5	1.69	3059.84	1.69	2865.7		1.365	17425.3	1.365	3482.11	1.365	4534.86
	1.365	22301.8	1.365	10221.3	1.365	3868.17		1.495	11505.4	1.495	4967.4	1.495	4366.83		1.755	14895.4	1.755	2856.02	1.755	2825.03		1.43	17276.8	1.43	3340.88	1.43	4622.62
	1.43	22396.5	1.43	9527.3	1.43	4033.07		1.56	11571.4	1.56	4962.09	1.56	4425.83		1.82	14541.9	1.82	2808.75	1.82	2708.21		1.495	16857.4	1.495	3220.8	1.495	4732.5
	1.495	21887.7	1.495	9212.94	1.495	4079.35		1.625	11719.8	1.625	5069.14	1.625	4414.88		1.885	14302.6	1.885	2792.9	1.885	2755.79		1.56	16485.4	1.56	3052.66	1.56	4980.98
	1.56	20712.7	1.56	9021	1.56	4176.67		1.69	11826.9	1.69	5206.38	1.69	4417.27		1.95	14211.6	1.95	2883.95	1.95	2634.66		1.625	16006.2	1.625	2936.59	1.625	5134.94
	1.625	19246.2	1.625	8567.06	1.625	4201.54		1.755	11886.3	1.755	5125.97	1.755	4419.23		2.015	14083.6	2.015	2983.69	2.015	2613.44		1.69	15524.9	1.69	2865.55	1.69	5063.85
	1.69	18151	1.69	8202.37	1.69	4151.59		1.82	12014.2	1.82	5045.84	1.82	4329.04		2.08	14311.3	2.08	2792.04	2.08	2539.35		1.755	15050.5	1.755	2779.77	1.755	4874.45
	1.755	17366	1.755	8142	1.755	4104		1.885	11963	1.885	5070.45	1.885	4205.6		2.145	14220.8	2.145	2914.94	2.145	2501.7		1.82	14762.2	1.82	2744.42	1.82	4799.82
	1.82	16384.1	1.82	7936.67	1.82	3985.52		1.95	11519.1	1.95	4881.37	1.95	4208.65		2.21	14317	2.21	2924	2.21	2567		1.885	14751.8	1.885	2695.04	1.885	4791.49
	1.885	15921.5	1.885	7771.48	1.885	3854.39		2.015	11283.7	2.015	4684.69	2.015	4080.61									1.95	14778.5	1.95	2649.08	1.95	4773.06
	1.95	15852.7	1.95	7644.67	1.95	3742.33		2.08	11130.9	2.08	4734.39	2.08	3863.69		0	15363	0	2810	0	2559		2.015	14735.2	2.015	2637.41	2.015	4792.86
	2.015	15602.5	2.015	7598.8	2.015	3785.44		2.145	11165.6	2.145	4588.34	2.145	3870.84		0.065	15399.5	0.065	3039.4	0.065	2514.1		2.08	14864.7	2.08	2595.79	2.08	4662.5
	2.08	15382.4	2.08	7555.85	2.08	3771.41		2.21	11228.7	2.21	4616.81	2.21	3717.46		0.13	15705	0.13	3062	0.13	2760.39		2.145	15132.6	2.145	2605.48	2.145	4597.37
	2.145	14832.2	2.145	7178.67	2.145	3590.33		2.275	11604	2.275	4428	2.275	3929		0.195	15780.5	0.195	3420.27	0.195	2689.61
	2.21	14793.8	2.21	7010.96	2.21	3606.56									0.26	16437.1	0.26	3446.71	0.26	2621.71		0	11329.3	0	2854.58	0	3144.67
	2.275	14495.6	2.275	6702.89	2.275	3741.63		0	13677	0	4538	0	4027		0.325	17053	0.325	3687	0.325	2562.42		0.065	11455.8	0.065	2864.3	0.065	3247.64
	2.34	14191	2.34	6263	2.34	3752		0.065	13401.4	0.065	4474.81	0.065	3887.82		0.39	17838.9	0.39	3906.65	0.39	2383.36		0.13	11356.8	0.13	2793.83	0.13	3339.67
								0.13	13178.4	0.13	4433.4	0.13	4040.34		0.455	18261	0.455	3952	0.455	2415.06		0.195	11293.5	0.195	2835.29	0.195	3413.57
	0	9871	0	4438	0	2746		0.195	13089.3	0.195	4405.42	0.195	4192.24		0.52	18235	0.52	4114.19	0.52	2379.81		0.26	11505.8	0.26	2899.6	0.26	3471.38
	0.065	10199	0.065	4247.43	0.065	2880.5		0.26	13068.1	0.26	4391.7	0.26	4245.22		0.585	18617.1	0.585	4191.29	0.585	2277.58		0.325	11782.8	0.325	2918.78	0.325	3495.4
	0.13	9878.01	0.13	4130.17	0.13	2882.31		0.325	12885.8	0.325	4436.33	0.325	4406.78		0.65	18364.9	0.65	4372.48	0.65	2359.13		0.39	12180.9	0.39	2909.7	0.39	3504.13
	0.195	9822.79	0.195	4185.35	0.195	2978.97		0.39	12741.8	0.39	4553.13	0.39	4368.7		0.715	18228.1	0.715	4170.92	0.715	2276.89		0.455	12498.7	0.455	2999.57	0.455	3450.99
	0.26	9815.46	0.26	4230.08	0.26	3103.01		0.455	12702	0.455	4658.88	0.455	4435.6		0.78	18113.1	0.78	4232.35	0.78	2155.23		0.52	12776.7	0.52	3075.52	0.52	3355.24
	0.325	10076.5	0.325	4313.27	0.325	3348.24		0.52	12659.6	0.52	4644.31	0.52	4478.3		0.845	18563.3	0.845	4120.11	0.845	2231.21		0.585	12960.1	0.585	3115.71	0.585	3265.1
	0.39	10395.5	0.39	4528.88	0.39	3492.33		0.585	12648.4	0.585	4693.39	0.585	4415.71		0.91	18257.1	0.91	4005.19	0.91	2143.87		0.65	13079.8	0.65	3139.16	0.65	3234.59
	0.455	11003.2	0.455	4454.44	0.455	3533.2		0.65	12760.1	0.65	4811.98	0.65	4204.86		0.975	17920.7	0.975	3954.65	0.975	2196.92		0.715	13289.1	0.715	3121.3	0.715	3178.12
	0.52	12089.8	0.52	4687.43	0.52	3451.6		0.715	12755.5	0.715	4938.64	0.715	4019.31		1.04	17589.8	1.04	4046.58	1.04	2224.61		0.78	13522.7	0.78	3176.48	0.78	3163.22
	0.585	12987	0.585	4794.98	0.585	3389.78		0.78	12761.4	0.78	5092.66	0.78	3996.69		1.105	17027.1	1.105	3832.06	1.105	2239.76		0.845	13827.2	0.845	3222.76	0.845	3159.34
	0.65	13546.8	0.65	5016.8	0.65	3191.35		0.845	12628.3	0.845	4926.61	0.845	3860.89		1.17	16886.7	1.17	3728.48	1.17	2241.16		0.91	14248.5	0.91	3209.41	0.91	3168.93
	0.715	13503.6	0.715	5126.4	0.715	2958.77		0.91	12716.6	0.91	4799.92	0.91	3722.76		1.235	16011.1	1.235	3614.29	1.235	2382.69		0.975	14463.6	0.975	3245.45	0.975	3128.55
	0.78	13273.9	0.78	5173.1	0.78	2900.19		0.975	12596.4	0.975	4845.63	0.975	3653.65		1.3	16072.8	1.3	3425.9	1.3	2360.55		1.04	14715	1.04	3370.27	1.04	3116.48
	0.845	12957.1	0.845	5106.33	0.845	2726.2		1.04	12292.9	1.04	5005.89	1.04	3566.22		1.365	15241.4	1.365	3376.9	1.365	2452.95		1.105	14390.1	1.105	3375.72	1.105	3129.73
	0.91	12791.2	0.91	5031.12	0.91	2577.24		1.105	12287.1	1.105	4992.35	1.105	3620.02		1.43	14596	1.43	3095.03	1.43	2618.61		1.17	13967.9	1.17	3307.91	1.17	3081.67
	0.975	12566.8	0.975	5137.08	0.975	2550.92		1.17	12383.2	1.17	4953.46	1.17	3694.99		1.495	14122	1.495	3017.73	1.495	2722.27		1.235	13872	1.235	3297.69	1.235	3112.47
	1.04	12583.7	1.04	5158.1	1.04	2478.48		1.235	12521.2	1.235	5088.83	1.235	3556.82		1.56	13356	1.56	2849.97	1.56	2660.36		1.3	13524.5	1.3	3227.71	1.3	3171.12
	1.105	13114.4	1.105	5280.22	1.105	2556.46		1.3	12499.6	1.3	5214.14	1.3	3564.63		1.625	13291.4	1.625	2809.47	1.625	2698.29		1.365	13264	1.365	3248.99	1.365	3208.2
	1.17	13701	1.17	5171.82	1.17	2607		1.365	12541.7	1.365	5242.24	1.365	3602.92		1.69	12983.5	1.69	2700.52	1.69	2507.23		1.43	13482	1.43	3230.3	1.43	3227.43
	1.235	14770.6	1.235	5241.23	1.235	2676.73		1.43	12566.8	1.43	5336.61	1.43	3626.29		1.755	12926.7	1.755	2574.27	1.755	2621.55		1.495	13196.8	1.495	3100.56	1.495	3384.09
	1.3	16431.9	1.3	5618.73	1.3	2734.9		1.495	12219.2	1.495	5169.05	1.495	3828.17		1.82	12921.7	1.82	2799.19	1.82	2450.81		1.56	13449.4	1.56	3047.7	1.56	3541.23
	1.365	17787.2	1.365	5808	1.365	2864.48		1.56	12052.4	1.56	5098.78	1.56	4037.68		1.885	12571.1	1.885	2634.45	1.885	2449.03		1.625	13074.1	1.625	2806.75	1.625	3663.26
	1.43	18635.2	1.43	6044.39	1.43	3007.77		1.625	12042.4	1.625	5002.18	1.625	4073.71		1.95	12590.3	1.95	2558	1.95	2411.45		1.69	12550.3	1.69	2943.15	1.69	3737.8
	1.495	18615.3	1.495	6146.12	1.495	3139.19		1.69	11765.9	1.69	5084.56	1.69	4209.37		2.015	13083.5	2.015	2676	2.015	2396.5		1.755	12270.7	1.755	2803.98	1.755	4027.81
	1.56	17687.3	1.56	5829.68	1.56	3197.29		1.755	11548.5	1.755	4933.59	1.755	4152.57									1.82	11850.1	1.82	2818.09	1.82	3879.95
	1.625	16061.7	1.625	5683.86	1.625	3422.67		1.82	11363.9	1.82	4738	1.82	3977.84		0	14221	0	2614	0	2648		1.885	11392.8	1.885	2693.82	1.885	3660.79
	1.69	14041	1.69	5259.42	1.69	3405.46		1.885	11196.6	1.885	4751.1	1.885	3940.79		0.065	14375	0.065	2678.26	0.065	2665.83		1.95	11420.4	1.95	2665.92	1.95	3466.6
	1.755	12486.5	1.755	4997.4	1.755	3358.21		1.95	11208.1	1.95	4700.57	1.95	3630.12		0.13	14698.5	0.13	2591.49	0.13	2592.12		2.015	11532.7	2.015	2618.72	2.015	3481.29
	1.82	11264.4	1.82	5085.68	1.82	3195.52		2.015	11375	2.015	4613.94	2.015	3344.85		0.195	14538.1	0.195	2748.81	0.195	2732.79		2.08	11185.7	2.08	2658.74	2.08	3322.68
	1.885	10775.4	1.885	5138.82	1.885	2842.24		2.08	11450	2.08	4485.05	2.08	3310.87		0.26	15469.8	0.26	2865.17	0.26	2820.8		2.145	11236.5	2.145	2569.24	2.145	3302.14
	1.95	10855.2	1.95	5326.65	1.95	2639.78		2.145	11357.7	2.145	4606.1	2.145	3426.3		0.325	15432.2	0.325	2957.47	0.325	2756.9		2.21	11406.1	2.21	2565.26	2.21	3280.88
	2.015	10894.8	2.015	5357.16	2.015	2565.43		2.21	11398.2	2.21	4650.51	2.21	3526.03		0.39	15783.2	0.39	2982.92	0.39	2800.92		2.275	11314.8	2.275	2523.12	2.275	3257.12
	2.08	10548.8	2.08	5225.99	2.08	2533.78		2.275	11754	2.275	4695	2.275	3482		0.455	16250.5	0.455	3111.29	0.455	2802.99		2.34	11203.4	2.34	2508.39	2.34	3232.28
	2.145	10416.5	2.145	5266.94	2.145	2462.56									0.52	16571.7	0.52	3252.96	0.52	2632.74		HeLa_tetCENPBmCRMI1_STB-MG132_+Dox_AZD1152_BLM-RFP-BubR1-08.czi
	2.21	10217	2.21	5003.19	2.21	2419.99		0	13114	0	5509	0	3859		0.585	16584.9	0.585	3399.5	0.585	2549.69
	2.275	9853	2.275	4982	2.275	2527		0.065	12781.1	0.065	5445.47	0.065	3963		0.65	16657.9	0.65	3570.82	0.65	2483.59		0	9738	0	2877.5	0	3843
								0.13	13246.8	0.13	5705.88	0.13	4021.65		0.715	16342.6	0.715	3762.59	0.715	2434.15		0.065	9905.36	0.065	2886.73	0.065	3767.64
	0	10218	0	4689	0	2675		0.195	13212.2	0.195	5931.53	0.195	4060.06		0.78	15818.2	0.78	3739.67	0.78	2271.83		0.13	10309.5	0.13	2853.31	0.13	3815.95
	0.065	10433.6	0.065	4709.46	0.065	2619.4		0.26	13259.2	0.26	6111.18	0.26	4149.41		0.845	16073.2	0.845	3693.39	0.845	2202		0.195	10506.7	0.195	2955.06	0.195	3983.49
	0.13	10336.4	0.13	4855.2	0.13	2745.54		0.325	13334.6	0.325	6466.35	0.325	4281.24		0.91	16141.9	0.91	3543.44	0.91	2190.81		0.26	10762.3	0.26	3015.84	0.26	4012.42
	0.195	10639.7	0.195	4637.49	0.195	2759.14		0.39	13017.7	0.39	6632.35	0.39	4505.18		0.975	16039	0.975	3479.29	0.975	2177.69		0.325	11128.7	0.325	3086.93	0.325	4063.55
	0.26	10140.7	0.26	4765.83	0.26	2802.91		0.455	13096.9	0.455	6444	0.455	4479.29		1.04	15742.5	1.04	3557.59	1.04	2133.15		0.39	11415.4	0.39	3171.54	0.39	4237.49
	0.325	10285.1	0.325	4667	0.325	2888.43		0.52	12915.2	0.52	6649.41	0.52	4487.47		1.105	15630.7	1.105	3473.66	1.105	2138.46		0.455	11789.4	0.455	3347.91	0.455	4411.65
	0.39	10344.6	0.39	4669.77	0.39	3072.03		0.585	12471.8	0.585	6526.24	0.585	4338.71		1.17	15312.2	1.17	3495.5	1.17	2077.75		0.52	12004.3	0.52	3456.26	0.52	4437.45
	0.455	10581	0.455	4601.4	0.455	3240.2		0.65	12318.3	0.65	6151	0.65	4192.76		1.235	15448.3	1.235	3548.95	1.235	2129.37		0.585	12621.8	0.585	3623.41	0.585	4378.39
	0.52	10643.3	0.52	4757.94	0.52	3316.6		0.715	12224.8	0.715	6040.47	0.715	3773.53		1.3	14936.8	1.3	3423.72	1.3	2068.17		0.65	13178.2	0.65	3758.48	0.65	4329.5
	0.585	10696.3	0.585	4945.6	0.585	3488.89		0.78	12361.7	0.78	6056.35	0.78	3684		1.365	14590.7	1.365	3447.71	1.365	2083.83		0.715	13941.2	0.715	3811.64	0.715	4367.68
	0.65	11075.9	0.65	5108.57	0.65	3427.43		0.845	12528.2	0.845	5683.18	0.845	3357.88		1.43	14314.1	1.43	3335.45	1.43	2142.5		0.78	13608.6	0.78	3885.51	0.78	4171.96
	0.715	11233.5	0.715	5417.74	0.715	3415		0.91	12839.2	0.91	5441.53	0.91	3389.59		1.495	14027.2	1.495	3413.24	1.495	2111.08		0.845	12987.8	0.845	3737.91	0.845	4019.72
	0.78	11566.5	0.78	5594.86	0.78	3317.89		0.975	12474.2	0.975	5509.41	0.975	3225.94		1.56	13735	1.56	3438.67	1.56	2056		0.91	12345.8	0.91	3616.54	0.91	3907.14
	0.845	11595.1	0.845	5643.51	0.845	3045.49		1.04	11622.6	1.04	5306.41	1.04	3306.06		1.625	13528.3	1.625	3362.56	1.625	2085.71		0.975	12065.5	0.975	3650.85	0.975	3932.35
	0.91	12045.8	0.91	5732.4	0.91	2888.4		1.105	11301	1.105	5209	1.105	3347		1.69	13022	1.69	3224.68	1.69	2200.77		1.04	12029.4	1.04	3468.95	1.04	3853.67
	0.975	12600.1	0.975	5659.14	0.975	2976.43		1.17	11276.4	1.17	5138.29	1.17	3343.35		1.755	12589.8	1.755	3133.69	1.755	2262.38		1.105	11783.8	1.105	3334.21	1.105	3895.38
	1.04	12618.7	1.04	5605.83	1.04	2927.83		1.235	11011.4	1.235	5336	1.235	3426.82		1.82	12435.4	1.82	3062.7	1.82	2440.15		1.17	11368.4	1.17	3167.17	1.17	3935.98
	1.105	12895.3	1.105	5490.4	1.105	2956.31		1.3	10782.5	1.3	5569.94	1.3	3382.29		1.885	12088	1.885	2953.18	1.885	2472.96		1.235	10720.5	1.235	3080.09	1.235	4096.7
	1.17	12970.4	1.17	5526.91	1.17	3095.63		1.365	10807.8	1.365	5525.24	1.365	3418.35		1.95	11904.4	1.95	2958.25	1.95	2349.58		1.3	10395.2	1.3	3007.66	1.3	4375.06
	1.235	13695.4	1.235	5838.46	1.235	3207.91		1.43	10633.6	1.43	5618.29	1.43	3355.18		2.015	11550	2.015	2810.32	2.015	2299.54		1.365	9974.64	1.365	2934.82	1.365	4517.5
	1.3	14481.7	1.3	5814.86	1.3	3175.43		1.495	10972.4	1.495	5487.53	1.495	3595.53		2.08	11453.3	2.08	2647.7	2.08	2137.44		1.43	9930.28	1.43	2899.85	1.43	4684.59
	1.365	14482	1.365	6116	1.365	3181.6		1.56	11137.6	1.56	5470	1.56	3850		2.145	11503.5	2.145	2621.38	2.145	1992		1.495	9735.09	1.495	2869.41	1.495	4644.01
	1.43	14402.6	1.43	6243.49	1.43	3429.8		1.625	11062.7	1.625	5267.12	1.625	3922.71		2.21	11181	2.21	2631.65	2.21	1959.92		1.56	9638.95	1.56	2878.63	1.56	4475.83
	1.495	14508.5	1.495	6241.23	1.495	3539.06		1.69	11089.2	1.69	5330.88	1.69	4146.71		2.275	11039.6	2.275	2607.54	2.275	1948.5		1.625	9684.19	1.625	2896.33	1.625	4132.21
	1.56	14063.5	1.56	6180.74	1.56	3818.6		1.755	11042.2	1.755	5214.18	1.755	4598.88		2.34	11192	2.34	2540.5	2.34	1911.5		1.69	9571.51	1.69	2914.37	1.69	3935.73
	1.625	13383.4	1.625	6070.71	1.625	4052		1.82	11130.4	1.82	4862.12	1.82	4347.12		HeLa_tetCENPBmCRMI1_STB-MG132_+Dox_RO3306_BLM-RFP-BubR1-08.czi							1.755	9706.97	1.755	2931.85	1.755	3738.31
	1.69	11874.2	1.69	5728.94	1.69	3954.09		1.885	11016.8	1.885	4861.35	1.885	4282.18									1.82	9774.73	1.82	2907.15	1.82	3561.14
	1.755	11150.5	1.755	5396.91	1.755	3767.46		1.95	10832.1	1.95	4783.94	1.95	3995.41		0	10503.2	0	3385.88	0	2725.25		1.885	9659.5	1.885	2864.33	1.885	3516.89
	1.82	10816.2	1.82	5246.8	1.82	3586.2		2.015	10960.4	2.015	4702	2.015	3790.12		0.065	10479.7	0.065	3407.2	0.065	2745.49		1.95	9769.63	1.95	2883	1.95	3250.03
	1.885	10540.7	1.885	5204.63	1.885	3356.63		2.08	10795.8	2.08	4581.41	2.08	3431.12		0.13	10534.1	0.13	3455.41	0.13	2838.56		2.015	10007.4	2.015	2793.11	2.015	3164.94
	1.95	10316.3	1.95	5056	1.95	3391.29		2.145	11307	2.145	4600.18	2.145	3487.41		0.195	10700.4	0.195	3553.6	0.195	2996.21
	2.015	9958.09	2.015	5046	2.015	3005.77		2.21	11335	2.21	4514	2.21	3365		0.26	11104	0.26	3658.44	0.26	3165.25		0	11216.5	0	2625.38	0	3357.75
	2.08	9963.57	2.08	4796.74	2.08	3160.66									0.325	11709	0.325	3790.56	0.325	3360.38		0.065	11162.7	0.065	2649.15	0.065	3473.18
	2.145	9934	2.145	4885.46	2.145	3034.54		0	12537	0	4833	0	4187		0.39	12228.3	0.39	4006.31	0.39	3369.48		0.13	10723.9	0.13	2670.62	0.13	3563.51
	2.21	9664	2.21	4957.54	2.21	3100.23		0.065	12570.6	0.065	4702.07	0.065	4235.88		0.455	12614.1	0.455	4052.6	0.455	3333.3		0.195	10420.7	0.195	2735.81	0.195	3683.95
	2.275	9799	2.275	5179	2.275	3127		0.13	12296.1	0.13	4741.63	0.13	4194.63		0.52	12638.2	0.52	4179.17	0.52	3245.77		0.26	10365.5	0.26	2810.55	0.26	3702.87
	HeLa_tetCENPBmCRMI1_STB-MG132_+Dox_BI2536_BLM-RFP-BubR1-07.czi							0.195	12062.5	0.195	4717.06	0.195	4386.34		0.585	12528.3	0.585	4457.53	0.585	3217.63		0.325	10180.7	0.325	2826.09	0.325	3651.82
								0.26	12348.8	0.26	4669.44	0.26	4340.9		0.65	12480.2	0.65	4682.22	0.65	3180.08		0.39	10059.6	0.39	2902.52	0.39	3622.09
	0	17707	0	5720	0	4682		0.325	12552	0.325	4974	0.325	4471.86		0.715	12429.5	0.715	4897.84	0.715	3045.8		0.455	9968.5	0.455	2933.84	0.455	3538.14
	0.065	17924.7	0.065	5773.77	0.065	4658.78		0.39	13082.4	0.39	4998.55	0.39	4568.41		0.78	12496.3	0.78	5128.02	0.78	2964.63		0.52	9835	0.52	3007.29	0.52	3516.92
	0.13	18111.7	0.13	5827.06	0.13	4834		0.455	13027.8	0.455	5128.12	0.455	4590.8		0.845	13230.8	0.845	5341.25	0.845	2991.54		0.585	9597.17	0.585	3152.8	0.585	3354.15
	0.195	18049.9	0.195	5981.28	0.195	5049.8		0.52	12820.8	0.52	5052.94	0.52	4577.28		0.91	13678.6	0.91	5399.52	0.91	2807.41		0.65	9884.92	0.65	3076.89	0.65	3277.25
	0.26	17969.3	0.26	6114.85	0.26	5277.82		0.585	12490.9	0.585	5100.82	0.585	4462.34		0.975	13925.6	0.975	5453.23	0.975	2656.75		0.715	10068.4	0.715	3166.71	0.715	3269.24
	0.325	18095.6	0.325	6249.23	0.325	5386.61		0.65	12399.5	0.65	5062.08	0.65	4433.1		1.04	13748.6	1.04	5559.98	1.04	2626.91		0.78	10076.2	0.78	3213.88	0.78	3229.38
	0.39	18167.9	0.39	6456	0.39	5392.67		0.715	12433.7	0.715	5176.32	0.715	4292.31		1.105	13439.5	1.105	5528.3	1.105	2579.65		0.845	9937.9	0.845	3205.21	0.845	3218.05
	0.455	17846	0.455	6649.25	0.455	5284.14		0.78	12327.7	0.78	5285.79	0.78	4282.76		1.17	13393.2	1.17	5538.09	1.17	2563.29		0.91	9791.88	0.91	3239.3	0.91	3352.1
	0.52	17854.3	0.52	6870.25	0.52	5023.83		0.845	12491	0.845	5359.37	0.845	4244.29		1.235	13777.4	1.235	5571.41	1.235	2625.91		0.975	9619.06	0.975	3217.51	0.975	3284.92
	0.585	17789.4	0.585	6951.43	0.585	4630.73		0.91	12623.7	0.91	5436.92	0.91	4111.36		1.3	14273.1	1.3	5516.61	1.3	2638.24		1.04	9665.6	1.04	3325.3	1.04	3275.58
	0.65	17969.2	0.65	7000.6	0.65	4394.96		0.975	12809.4	0.975	5410.35	0.975	4090.57		1.365	14669.7	1.365	5523.63	1.365	2647.78		1.105	9447.18	1.105	3234.03	1.105	3253.58
	0.715	18094.9	0.715	7127.67	0.715	4265.87		1.04	12919.8	1.04	5436.21	1.04	4073.52		1.43	14530.8	1.43	5515	1.43	2622.56		1.17	9581.51	1.17	3178.47	1.17	3468.82
	0.78	18001.7	0.78	7118.75	0.78	4135.51		1.105	12902.4	1.105	5505.26	1.105	4155.94		1.495	14387.8	1.495	5558.74	1.495	2668.98		1.235	9632.46	1.235	2998.52	1.235	3483.95
	0.845	17911.2	0.845	7100.39	0.845	3988.8		1.17	12951.7	1.17	5525.28	1.17	4222.26		1.56	13956.7	1.56	5535.14	1.56	2752.83		1.3	9704.92	1.3	2928.08	1.3	3497.92
	0.91	17785.7	0.91	6939.67	0.91	3913.89		1.235	12837.9	1.235	5466.4	1.235	4223.14		1.625	13669.8	1.625	5601.99	1.625	2841.03		1.365	9568.62	1.365	3016.59	1.365	3559.22
	0.975	17630.8	0.975	6779.6	0.975	3921.38		1.3	12742.3	1.3	5299.82	1.3	4218.76		1.69	13568.6	1.69	5650.05	1.69	2928.03		1.43	9492.51	1.43	2849.88	1.43	3587.9
	1.04	17644.7	1.04	6645.96	1.04	3825.64		1.365	12839.3	1.365	5175	1.365	4147.8		1.755	13720.8	1.755	5541.41	1.755	2977.65		1.495	9339.06	1.495	2745.46	1.495	3388.05
	1.105	17117.9	1.105	6553.59	1.105	3875.66		1.43	12859.5	1.43	5217.34	1.43	4120.06		1.82	13520.2	1.82	5317.36	1.82	3116.3		1.56	9214.68	1.56	2676.64	1.56	3264.77
	1.17	17021	1.17	6580.51	1.17	3774.53		1.495	12734.6	1.495	5121.78	1.495	4221.53		1.885	13203.8	1.885	5186.29	1.885	3462.72		1.625	9434.47	1.625	2755.13	1.625	3198.33
	1.235	17485	1.235	6679.12	1.235	3840.57		1.56	12716.3	1.56	5070.94	1.56	4249.18		1.95	12977.1	1.95	4862.83	1.95	3793.59		1.69	9316.05	1.69	2602.3	1.69	3300.35
	1.3	18333.5	1.3	6739.04	1.3	3891.86		1.625	12767.5	1.625	5060.57	1.625	4422.77		2.015	12693.2	2.015	4504.65	2.015	3866.83
	1.365	18812.5	1.365	6677.75	1.365	3909.5		1.69	12783.9	1.69	4857.89	1.69	4439.68		2.08	12271.7	2.08	4194.81	2.08	3844.24		0	9125	0	2494.94	0	2747.56
	1.43	19206.6	1.43	6686.11	1.43	4057.51		1.755	12769.5	1.755	4914.02	1.755	4482.07		2.145	11855.4	2.145	3935.79	2.145	3890.75		0.065	9184.36	0.065	2480.58	0.065	2715.8
	1.495	19352.9	1.495	6798.15	1.495	4191.09		1.82	12581.3	1.82	4751.44	1.82	4509.88		2.21	11804.6	2.21	3743.39	2.21	3716.79		0.13	9239.22	0.13	2524.83	0.13	2778.65
	1.56	20046.3	1.56	6730.71	1.56	4276.75		1.885	12680.2	1.885	4698.53	1.885	4563.58		2.275	11511.3	2.275	3667.48	2.275	3521.75		0.195	9180.06	0.195	2496.49	0.195	2742.18
	1.625	20318.6	1.625	6617.18	1.625	4360.94		1.95	12529.2	1.95	4597.22	1.95	4468.67		2.34	11660.2	2.34	3517.67	2.34	3426.83		0.26	9582.66	0.26	2730.52	0.26	2819.69
	1.69	19469.3	1.69	6488.59	1.69	4430.45		2.015	12447.7	2.015	4515.42	2.015	4352.95		2.405	11174.2	2.405	3414	2.405	3317.75		0.325	9621	0.325	2662.43	0.325	2837.54
	1.755	18152	1.755	6259.59	1.755	4553.88		2.08	12337.2	2.08	4485.51	2.08	4141.79		2.47	11168.5	2.47	3236	2.47	3413.75		0.39	9521.81	0.39	2752.26	0.39	2874.5
	1.82	17312.5	1.82	6045.33	1.82	4586.67		2.145	12155.2	2.145	4513.2	2.145	3965.14									0.455	9770.08	0.455	2767.06	0.455	2842.91
	1.885	16413.3	1.885	5765.75	1.885	4638.41		2.21	12299	2.21	4438.39	2.21	3820.6		0	8045	0	2657.5	0	1957.88		0.52	9801.39	0.52	2795.97	0.52	2895.07
	1.95	15761.4	1.95	5426.12	1.95	4523.65		2.275	12078	2.275	4507	2.275	3754		0.065	7992.3	0.065	2647.47	0.065	1965.97		0.585	9635.21	0.585	2808.59	0.585	2863.91
	2.015	15271	2.015	5183.86	2.015	4287.72									0.13	7991.5	0.13	2689.39	0.13	2030.06		0.65	9446.12	0.65	2982.92	0.65	2796.86
	2.08	15069.8	2.08	5068.07	2.08	4183.05		0	13877	0	4782	0	3887		0.195	8102.82	0.195	2719.53	0.195	2118.86		0.715	9684.06	0.715	3021.18	0.715	2773.73
	2.145	14900.4	2.145	5005	2.145	4030.51		0.065	13298	0.065	4813.89	0.065	4139.5		0.26	8293.31	0.26	2724.97	0.26	2244.69		0.78	9835.25	0.78	3060.93	0.78	2725.78
	2.21	15162.9	2.21	5042.14	2.21	3993.24		0.13	13161.8	0.13	4756.93	0.13	4074.9		0.325	8945.38	0.325	2800.85	0.325	2346.02		0.845	10153.5	0.845	3105.11	0.845	2749.68
	2.275	14849.8	2.275	4806.53	2.275	3916.08		0.195	12790.4	0.195	4826.22	0.195	4039.14		0.39	9706.19	0.39	2929.16	0.39	2397.02		0.91	10383.7	0.91	3148.24	0.91	2736.71
	2.34	15035	2.34	4770.08	2.34	3860.2		0.26	12921.4	0.26	4924.11	0.26	4359.43		0.455	10514.6	0.455	2964.03	0.455	2380.22		0.975	10188.1	0.975	3156.32	0.975	2723.72
	2.405	15215.1	2.405	4817.13	2.405	3921.86		0.325	13144.7	0.325	5145.06	0.325	4582.86		0.52	11636.3	0.52	3158.66	0.52	2322.91		1.04	10084.7	1.04	3102.39	1.04	2678.86
	2.47	15411.5	2.47	4777.61	2.47	3910.5		0.39	13029.7	0.39	5241	0.39	4573.72		0.585	12347	0.585	3334	0.585	2292.54		1.105	10122.4	1.105	3050.44	1.105	2741.54
	2.535	15334.5	2.535	4735.79	2.535	3835.1		0.455	13001.6	0.455	5331.35	0.455	4725.61		0.65	12565.9	0.65	3449.21	0.65	2223.65		1.17	10057	1.17	3093.77	1.17	2741.54
	2.6	15341.2	2.6	4734.24	2.6	3936.21		0.52	12873.9	0.52	5403.9	0.52	4833.21		0.715	12311	0.715	3488.27	0.715	2171.12		1.235	10281.5	1.235	3127.62	1.235	2743.22
	2.665	15580.5	2.665	4699.27	2.665	3968.6		0.585	12822.1	0.585	5420.12	0.585	4746.62		0.78	11887.8	0.78	3470.25	0.78	2208.69		1.3	10383.9	1.3	3102.99	1.3	2863.43
	2.73	15506	2.73	4640	2.73	3835		0.65	13167	0.65	5450.7	0.65	4537.53		0.845	11606.5	0.845	3518.33	0.845	2142.88		1.365	10206.2	1.365	3196.21	1.365	2793.47
								0.715	13160.4	0.715	5355.2	0.715	4197.61		0.91	11313.7	0.91	3524.35	0.91	2129.99		1.43	9947.04	1.43	3214.13	1.43	2773.64
	0	19955	0	8232	0	4599		0.78	13000	0.78	5321	0.78	4061.11		0.975	10834.7	0.975	3493.33	0.975	2168.07		1.495	9522.67	1.495	3054.88	1.495	2863.53
	0.065	20511.6	0.065	8313.87	0.065	4799.31		0.845	13115.5	0.845	5362.44	0.845	4079.31		1.04	10546.6	1.04	3503.75	1.04	2097.38		1.56	9173.79	1.56	2990.86	1.56	2874.56
	0.13	20741.4	0.13	8310.8	0.13	5131.48		0.91	13089.3	0.91	5475.56	0.91	3961.51		1.105	10505.1	1.105	3586.34	1.105	2133.24		1.625	8979.62	1.625	2801.88	1.625	2885.98
	0.195	21178.5	0.195	8275.18	0.195	5259.09		0.975	13320.8	0.975	5574.18	0.975	3990.43		1.17	10742.8	1.17	3608.63	1.17	2175.23		1.69	8884.69	1.69	2729.67	1.69	2869.66
	0.26	21161.6	0.26	8214.62	0.26	5230.9		1.04	13540.2	1.04	5672.23	1.04	3920.22		1.235	11250	1.235	3651.08	1.235	2147.66		1.755	8848.55	1.755	2658.05	1.755	2930.1
	0.325	21336.9	0.325	8037.21	0.325	5137.17		1.105	13804	1.105	5745.02	1.105	3915.68		1.3	11754.7	1.3	3799.09	1.3	2228.03		1.82	9080.26	1.82	2720.79	1.82	2879.95
	0.39	21330.6	0.39	7905.91	0.39	5006.27		1.17	14170	1.17	5787.5	1.17	3781		1.365	12205.9	1.365	4038.47	1.365	2262.66		1.885	8851.46	1.885	2528.06	1.885	2950.47
	0.455	20912.9	0.455	7775.85	0.455	4947.65		1.235	14774.2	1.235	5816.76	1.235	3860.71		1.43	12362	1.43	4133.05	1.43	2368.98		1.95	8973.52	1.95	2588.79	1.95	2898.14
	0.52	20963	0.52	7893.76	0.52	4931.27		1.3	14775.2	1.3	5833.64	1.3	3817.73		1.495	12822.6	1.495	4030.38	1.495	2497.53		2.015	9022.9	2.015	2615.89	2.015	2923.99
	0.585	21198.9	0.585	7966	0.585	4840.36		1.365	15169.3	1.365	5898.67	1.365	3788.67		1.56	12623.8	1.56	3776.03	1.56	2680.53		2.08	9154.43	2.08	2675.92	2.08	2802.96
	0.65	21322.5	0.65	7996.16	0.65	4667.74		1.43	14924.4	1.43	5962.33	1.43	4028.57		1.625	12163.1	1.625	3527.28	1.625	2806.55		2.145	9041	2.145	2554	2.145	2753
	0.715	20920.9	0.715	7916.67	0.715	4462.11		1.495	14657.4	1.495	5824.38	1.495	4232.41		1.69	11218.4	1.69	3335.57	1.69	2889.47
	0.78	20938.9	0.78	7844.27	0.78	4384.27		1.56	14369.4	1.56	5746.33	1.56	4464.89		1.755	10475.4	1.755	3131.3	1.755	2781.08		0	7800.03	0	3243.5	0	2402.44
	0.845	21026.3	0.845	7991.78	0.845	4365.56		1.625	14040.8	1.625	5663.76	1.625	4708.87		1.82	9938.44	1.82	3034.25	1.82	2682.31		0.065	7660.9	0.065	3197.48	0.065	2346.11
	0.91	21068.2	0.91	7954.98	0.91	4382.19		1.69	13929	1.69	5465.66	1.69	4900.98		1.885	9608.19	1.885	2886.31	1.885	2519.5		0.13	7613.75	0.13	3187.53	0.13	2420.92
	0.975	20975.1	0.975	7754.45	0.975	4424.45		1.755	13484.4	1.755	5205.38	1.755	4968.5		1.95	9628.15	1.95	2698.72	1.95	2371.87		0.195	7542.47	0.195	3183.36	0.195	2362.33
	1.04	20937.9	1.04	7863.14	1.04	4499.73		1.82	13060	1.82	5056.43	1.82	4951.21		2.015	9609.77	2.015	2674.7	2.015	2361.42		0.26	7521.75	0.26	3204	0.26	2421.25
	1.105	20187.6	1.105	7736.11	1.105	4562.58		1.885	12906.9	1.885	4918.25	1.885	4912.55		2.08	9728.25	2.08	2653.5	2.08	2341.75		0.325	7480	0.325	3337.35	0.325	2472.98
	1.17	19249.7	1.17	7484.27	1.17	4451.18		1.95	12844.8	1.95	4888.44	1.95	4640.94									0.39	7439.41	0.39	3443.03	0.39	2493.31
	1.235	19276.1	1.235	7412.44	1.235	4648.05		2.015	13466.6	2.015	4934.08	2.015	4190.42		0	11013	0	3673	0	2744.5		0.455	7469	0.455	3524.16	0.455	2525.33
	1.3	18719	1.3	7216.47	1.3	4734.14		2.08	14229	2.08	4828.9	2.08	4020.09		0.065	11041.6	0.065	3602.62	0.065	2687.25		0.52	7326.11	0.52	3638.61	0.52	2417.72
	1.365	18542.5	1.365	7110.55	1.365	4798		2.145	14548.1	2.145	4932.17	2.145	3968.94		0.13	11009.3	0.13	3665.09	0.13	2694.61		0.585	7381.07	0.585	3752.5	0.585	2253.73
	1.43	18170.9	1.43	6961.67	1.43	4854.22		2.21	14442.7	2.21	4961.35	2.21	3940.07		0.195	11139.9	0.195	3720.4	0.195	2759.1		0.65	7331.72	0.65	3910.09	0.65	2175.38
	1.495	17882	1.495	6739.83	1.495	4854.83		2.275	13642.6	2.275	4995.04	2.275	3943.42		0.26	11212.4	0.26	3726.46	0.26	2833.29		0.715	7153.63	0.715	3997.36	0.715	2142.3
	1.56	17783.6	1.56	6558.55	1.56	4793.27		2.34	13276	2.34	5009	2.34	4041		0.325	11095	0.325	3869.23	0.325	2805.37		0.78	7135.53	0.78	4005.58	0.78	2075.17
	1.625	17853.7	1.625	6488.15	1.625	4747.18		HeLa_tetCENPBmCRMI1_STB-MG132_+Dox_BLM-RFP-BubR1-10.czi							0.39	11099.1	0.39	3919.48	0.39	2823.74		0.845	7146.96	0.845	4054.3	0.845	2058.3
	1.69	17913.5	1.69	6488.95	1.69	4766.25									0.455	11166.1	0.455	3957.8	0.455	2788.56		0.91	7066.83	0.91	4035.62	0.91	2088.5
	1.755	18063	1.755	6503.36	1.755	4750.55		0	7907	0	3048.5	0	2554		0.52	11067.4	0.52	4186.72	0.52	2700.06		0.975	7123.55	0.975	3987.17	0.975	2125.52
	1.82	18358.2	1.82	6333.09	1.82	4613.25		0.065	7691.53	0.065	3132.06	0.065	2765.11		0.585	11176.2	0.585	4364.48	0.585	2648.22		1.04	7339	1.04	4036.25	1.04	2104.25
	1.885	18352.7	1.885	6184.09	1.885	4616.9		0.13	7903.89	0.13	3194.56	0.13	2812.56		0.65	11401.2	0.65	4491.18	0.65	2603.38		1.105	7547.96	1.105	4005.18	1.105	2100.22
	1.95	18215	1.95	6080	1.95	4551.64		0.195	8128.5	0.195	3352.75	0.195	2861.33		0.715	11454.2	0.715	4471.5	0.715	2499.8		1.17	7874.51	1.17	3956.99	1.17	2162.62
	2.015	17854.8	2.015	6109.77	2.015	4512.99		0.26	7979	0.26	3478.78	0.26	3148.78		0.78	11568.3	0.78	4670.05	0.78	2488.48		1.235	8173.64	1.235	3926.87	1.235	2196.11
	2.08	17374.7	2.08	6031.1	2.08	4653.79		0.325	8550.28	0.325	3477.36	0.325	3361.08		0.845	12137.1	0.845	4729	0.845	2502.28		1.3	8308.19	1.3	4024.17	1.3	2164.44
	2.145	17124	2.145	5991	2.145	4309		0.39	8446.67	0.39	3750	0.39	3676.67		0.91	12820	0.91	4887.48	0.91	2520.88		1.365	8535.19	1.365	4116.8	1.365	2131.24
								0.455	9031.86	0.455	3871.31	0.455	3660.61		0.975	14248.2	0.975	4909.12	0.975	2495.33		1.43	8604.41	1.43	4057.34	1.43	2136.38
	0	11889	0	3986	0	3094		0.52	8982.44	0.52	3882.56	0.52	3871.56		1.04	15210.9	1.04	4895.25	1.04	2424.42		1.495	8576.77	1.495	3993.5	1.495	2134.87
	0.065	12032.3	0.065	4092.92	0.065	3132.53		0.585	9223.5	0.585	4158.25	0.585	3790.5		1.105	15411.3	1.105	4888.46	1.105	2465.45		1.56	8691.83	1.56	3876.89	1.56	2196.5
	0.13	12155.9	0.13	4232.25	0.13	3170.75		0.65	9646.56	0.65	4440.89	0.65	3735.89		1.17	15137	1.17	5079.47	1.17	2451.27		1.625	8709.23	1.625	3669.73	1.625	2243.32
	0.195	12395.7	0.195	4291.37	0.195	3343.31		0.715	10437.6	0.715	4545.36	0.715	3520.97		1.235	14919.5	1.235	5107.26	1.235	2481.04		1.69	8853.87	1.69	3517.17	1.69	2265.48
	0.26	12499.1	0.26	4474.73	0.26	3493.4		0.78	10803.3	0.78	4541.83	0.78	3309.17		1.3	14726.7	1.3	5072.4	1.3	2467.02		1.755	8653	1.755	3377.71	1.755	2261.71
	0.325	12773.4	0.325	4642.48	0.325	3623.76		0.845	11088.6	0.845	4636.28	0.845	3184.28		1.365	14354.3	1.365	5127.7	1.365	2568.2		1.82	8281.75	1.82	3223.75	1.82	2309
	0.39	13172.3	0.39	4654.49	0.39	3832.39		0.91	10846.9	0.91	4687.56	0.91	3212.89		1.43	14081.5	1.43	5084.81	1.43	2611.07		1.885	7938.04	1.885	3089.62	1.885	2317.79
	0.455	13400.7	0.455	4803.22	0.455	3950.38		0.975	10894.3	0.975	5030.08	0.975	3011.42		1.495	13705.7	1.495	4882.11	1.495	2645.23		1.95	7794.78	1.95	3025.78	1.95	2300.25
	0.52	13787.5	0.52	4909.45	0.52	3994.54		1.04	10679.8	1.04	4846	1.04	3086.89		1.56	13231.1	1.56	4701.76	1.56	2794.03		2.015	7745.88	2.015	2862.48	2.015	2295.65
	0.585	13840.6	0.585	4952.12	0.585	3911.25		1.105	10253.2	1.105	4676.17	1.105	3027.17		1.625	12758.8	1.625	4498.03	1.625	2940.13		2.08	7635.94	2.08	2871.42	2.08	2309.72
	0.65	14068.6	0.65	4956.5	0.65	3889.15		1.17	9915	1.17	4688	1.17	3042		1.69	12224.1	1.69	4259.84	1.69	2876.74
	0.715	14157.7	0.715	4885.11	0.715	3813.37		1.235	9837.06	1.235	4536.11	1.235	2993		1.755	12053.4	1.755	4035.62	1.755	2851.68		0	9512.22	0	3364.69	0	2897.19
	0.78	14199.7	0.78	4954.24	0.78	3705.45		1.3	9890.17	1.3	4662.67	1.3	3090.67		1.82	12035.4	1.82	3994.1	1.82	2788.82		0.065	9620.78	0.065	3448.9	0.065	2796.01
	0.845	14269.9	0.845	4962.74	0.845	3572.45		1.365	10083.8	1.365	4660.42	1.365	3075.17		1.885	12026.1	1.885	3803.05	1.885	2719.39		0.13	9731.72	0.13	3464.14	0.13	2856.99
	0.91	14135.4	0.91	5017.27	0.91	3455.03		1.43	9913.22	1.43	4681.11	1.43	3095.67		1.95	11704.1	1.95	3748.66	1.95	2660.04		0.195	9664.64	0.195	3556.02	0.195	2849.09
	0.975	13957	0.975	5098.94	0.975	3374.78		1.495	10148.6	1.495	4848.17	1.495	3418.44		2.015	11160.6	2.015	3692.23	2.015	2648.98		0.26	9527.07	0.26	3768.13	0.26	2921.49
	1.04	14403.5	1.04	5125.31	1.04	3356.75		1.56	10293	1.56	4644.83	1.56	3283.17		2.08	11009	2.08	3657.23	2.08	2619.54		0.325	9560.47	0.325	3854.59	0.325	2987.24
	1.105	14610.9	1.105	5229.27	1.105	3439.51		1.625	10450.8	1.625	4449.81	1.625	3502		2.145	10688.7	2.145	3521.78	2.145	2555.06		0.39	9499.76	0.39	4118.12	0.39	2906.33
	1.17	14597.2	1.17	5300.67	1.17	3440.7		1.69	10249.2	1.69	4308.78	1.69	3532.44		2.21	10602.1	2.21	3536.91	2.21	2536.36		0.455	9535.94	0.455	4226.72	0.455	2875.89
	1.235	14553	1.235	5315	1.235	3496		1.755	10491.8	1.755	4119.25	1.755	3724.25		2.275	10621	2.275	3389.5	2.275	2546.5		0.52	9778.45	0.52	4274.71	0.52	2785.73
	1.3	14643.7	1.3	5342.94	1.3	3479.06		1.82	10580.2	1.82	4078.44	1.82	4005.89									0.585	9938.5	0.585	4432.09	0.585	2651.59
	1.365	14756.6	1.365	5455.78	1.365	3488.72		1.885	11160.8	1.885	3862.36	1.885	3955.83		0	9965.12	0	3088	0	2725.25		0.65	9862.67	0.65	4454.63	0.65	2563.84
	1.43	14771.5	1.43	5448.27	1.43	3483.96		1.95	11255.3	1.95	3592	1.95	3787.67		0.065	10206.9	0.065	3123.36	0.065	2745.49		0.715	9827.83	0.715	4338.32	0.715	2500.39
	1.495	14249	1.495	5317.95	1.495	3407.64		2.015	11409.4	2.015	3480.36	2.015	3604		0.13	10262.6	0.13	3226.91	0.13	2838.56		0.78	10052.4	0.78	4466.23	0.78	2484.02
	1.56	13892.3	1.56	5179.91	1.56	3438.15		2.08	11462.1	2.08	3261.22	2.08	3410.28		0.195	10114.9	0.195	3320.09	0.195	2996.21		0.845	10567.5	0.845	4464.91	0.845	2533.82
	1.625	13592.7	1.625	5188.45	1.625	3538.71		2.145	11952.8	2.145	3261.17	2.145	3389		0.26	10122.5	0.26	3506.2	0.26	3165.25		0.91	11405.8	0.91	4502.01	0.91	2490.43
	1.69	13455.6	1.69	5141.32	1.69	3597.8		2.21	11974.9	2.21	3175.22	2.21	3411.22		0.325	10418.2	0.325	3682.98	0.325	3360.38		0.975	11901.9	0.975	4538.46	0.975	2387.4
	1.755	13603.3	1.755	5030.83	1.755	3701.32		2.275	12186.9	2.275	3265.94	2.275	3476.64		0.39	11203.5	0.39	3882.41	0.39	3369.48		1.04	11812.7	1.04	4519.32	1.04	2383.03
	1.82	13866	1.82	4982.5	1.82	3740.72		2.34	12035.5	2.34	3280	2.34	3425		0.455	11533.4	0.455	4042.9	0.455	3333.3		1.105	11171.4	1.105	4584.38	1.105	2315.5
	1.885	14189.4	1.885	4953.65	1.885	3847.54									0.52	11490.3	0.52	4244.43	0.52	3245.77		1.17	10073.3	1.17	4659.08	1.17	2410.18
	1.95	14614	1.95	4698.17	1.95	3845.65		0	10911	0	3475	0	4083		0.585	11650.7	0.585	4288.84	0.585	3217.63		1.235	9140.36	1.235	4442.12	1.235	2366.65
	2.015	14389.7	2.015	4615.38	2.015	3665.36		0.065	11146.7	0.065	3472.44	0.065	4321.56		0.65	12085.4	0.65	4404.5	0.65	3180.08		1.3	8832	1.3	4434.19	1.3	2339.16
	2.08	14041.5	2.08	4446.26	2.08	3522.44		0.13	11372.4	0.13	3265.78	0.13	4170.22		0.715	12034.2	0.715	4397.41	0.715	3045.8		1.365	8544.19	1.365	4392.87	1.365	2245.28
	2.145	13897.2	2.145	4320.76	2.145	3561.94		0.195	11778	0.195	3412.67	0.195	4331		0.78	11933.1	0.78	4447.11	0.78	2964.63		1.43	8566.81	1.43	4414.8	1.43	2453.03
	2.21	13543.9	2.21	4318.03	2.21	3568.02		0.26	11822	0.26	3302.22	0.26	4346.78		0.845	11922.2	0.845	4402.3	0.845	2991.54		1.495	8341.14	1.495	4246.31	1.495	2356.77
	2.275	13445.4	2.275	4245.99	2.275	3472.94		0.325	11652.4	0.325	3463.22	0.325	4466.78		0.91	11920.2	0.91	4312.04	0.91	2807.41		1.56	8289.45	1.56	4110.04	1.56	2459.81
	2.34	13291.5	2.34	4171.4	2.34	3485.77		0.39	11444.3	0.39	3359.67	0.39	4479.33		0.975	11698.7	0.975	4328.47	0.975	2656.75		1.625	8197.97	1.625	3851.9	1.625	2577.47
	2.405	13323.6	2.405	4154.73	2.405	3553.32		0.455	11549.4	0.455	3509.78	0.455	4639.78		1.04	11414.1	1.04	4385.56	1.04	2626.91		1.69	8011.06	1.69	3677.49	1.69	2495.2
	2.47	13665	2.47	4147	2.47	3646		0.52	11191.1	0.52	3644	0.52	4926.22		1.105	11212.6	1.105	4284.75	1.105	2579.65		1.755	8071.52	1.755	3643.44	1.755	2605.26
								0.585	11423	0.585	3790	0.585	4722		1.17	10914.4	1.17	4253.6	1.17	2563.29		1.82	7885	1.82	3439.24	1.82	2562.45
	0	14095	0	3807	0	3808		0.65	11290.6	0.65	4072.89	0.65	4688.89		1.235	10979.4	1.235	4310.25	1.235	2625.91		1.885	7624.89	1.885	3328.5	1.885	2445.09
	0.065	14366.1	0.065	3955.97	0.065	3838.62		0.715	11140	0.715	4271.22	0.715	4558.44		1.3	11940.4	1.3	4235.73	1.3	2638.24		1.95	7639.07	1.95	3245.19	1.95	2409.82
	0.13	14276.1	0.13	3969.35	0.13	3794.81		0.78	11098.7	0.78	4270	0.78	4366		1.365	12341.7	1.365	4354.56	1.365	2647.78		2.015	7563.19	2.015	3219.12	2.015	2443.66
	0.195	14362.9	0.195	3960.44	0.195	3799.78		0.845	11136	0.845	4354	0.845	4110.56		1.43	12426.3	1.43	4360.52	1.43	2622.56		2.08	7571.38	2.08	3071.22	2.08	2243.78
	0.26	14197.4	0.26	3999.61	0.26	3821.61		0.91	10894.9	0.91	4373.11	0.91	4269.89		1.495	11464.5	1.495	4299.1	1.495	2668.98		2.145	7563.97	2.145	3063.61	2.145	2174.02
	0.325	14095.5	0.325	4024.14	0.325	3821.89		0.975	11264.7	0.975	4148.33	0.975	4077		1.56	10826.2	1.56	4324.79	1.56	2752.83		2.21	7543.14	2.21	3088.58	2.21	2204.7
	0.39	14213.1	0.39	4077.59	0.39	3927.5		1.04	10982.3	1.04	4087.89	1.04	4084.89		1.625	10331.3	1.625	4248.8	1.625	2841.03		2.275	7575.25	2.275	3091.33	2.275	2169.06
	0.455	14295.4	0.455	4067.96	0.455	3978.45		1.105	11283.8	1.105	4133.67	1.105	4146.33		1.69	10181.7	1.69	4143.19	1.69	2928.03
	0.52	14089.1	0.52	4140.86	0.52	3987.87		1.17	11000	1.17	3915	1.17	4024		1.755	9996.21	1.755	3960.45	1.755	2977.65		0	9976.81	0	3929.31	0	2938.19
	0.585	14449.9	0.585	4203.04	0.585	4082.91		1.235	11498	1.235	4116.22	1.235	4065.56		1.82	9784.37	1.82	3778.23	1.82	3116.3		0.065	10162.2	0.065	4044.48	0.065	2982.05
	0.65	14384.1	0.65	4534.44	0.65	4039.43		1.3	11305.8	1.3	3996.44	1.3	3977.56		1.885	10027.3	1.885	3729.46	1.885	3462.72		0.13	10493.5	0.13	4055.87	0.13	3112.02
	0.715	15124.2	0.715	4652.24	0.715	3911.19		1.365	11153	1.365	4042	1.365	4292.33		1.95	10533.7	1.95	3644.17	1.95	3793.59		0.195	10671.9	0.195	4187.48	0.195	3046.44
	0.78	15196.9	0.78	4819.14	0.78	3862.38		1.43	11414.4	1.43	4204.78	1.43	4181		2.015	10157.2	2.015	3565.68	2.015	3866.83		0.26	10900.3	0.26	4369.61	0.26	3147.48
	0.845	14946.4	0.845	4860.74	0.845	3725.52		1.495	11222.7	1.495	4085.11	1.495	4180.56		2.08	9574.49	2.08	3424.92	2.08	3844.24		0.325	11380.9	0.325	4484.99	0.325	3331.66
	0.91	14798.4	0.91	4936.62	0.91	3621.51		1.56	11251.7	1.56	4193	1.56	4335.67		2.145	8896.44	2.145	3284.47	2.145	3890.75		0.39	11618.7	0.39	4785.36	0.39	3378.45
	0.975	14798.1	0.975	4818.87	0.975	3534.13		1.625	11792.2	1.625	4374.67	1.625	4373.67		2.21	8771.22	2.21	3272.42	2.21	3716.79		0.455	11839.6	0.455	5318.58	0.455	3335.64
	1.04	14754.5	1.04	4771.14	1.04	3521.81		1.69	12193.3	1.69	4277.22	1.69	4639		2.275	8838.03	2.275	3187.07	2.275	3521.75		0.52	12048.2	0.52	5525.79	0.52	3283.96
	1.105	14658.3	1.105	4716.81	1.105	3531.77		1.755	13405	1.755	4060	1.755	4773		2.34	8583.87	2.34	3130.37	2.34	3426.83		0.585	11925.5	0.585	5788.46	0.585	3102.37
	1.17	14735.5	1.17	4649.47	1.17	3470.53		1.82	13905.6	1.82	4015.44	1.82	4999.33		2.405	8539.67	2.405	3124.53	2.405	3317.75		0.65	12002.3	0.65	5871.85	0.65	3120.49
	1.235	14768.2	1.235	4639.12	1.235	3471.02		1.885	13302.8	1.885	3783.22	1.885	5236		2.47	8607.19	2.47	3132.69	2.47	3413.75		0.715	11876.4	0.715	6039.68	0.715	3113.97
	1.3	14712.6	1.3	4613.27	1.3	3401.8		1.95	12749	1.95	3699.67	1.95	5241.33		HeLa_tetCENPBmCRMI1_STB-MG132_+Dox_RO3306_BLM-RFP-BubR1-15.czi							0.78	11565.2	0.78	6138.73	0.78	3099.17
	1.365	14952.7	1.365	4515.58	1.365	3432.28		2.015	12100.9	2.015	3558.44	2.015	5113.56									0.845	11376.7	0.845	6114.82	0.845	3122.14
	1.43	14765.2	1.43	4472.71	1.43	3534.21		2.08	12062.4	2.08	3541	2.08	4917		0	8884	0	2221.5	0	1802		0.91	11427.5	0.91	6063.93	0.91	3269.52
	1.495	14235.4	1.495	4479.79	1.495	3514.74		2.145	12412	2.145	3351	2.145	4616.67		0.065	9106.36	0.065	2334.77	0.065	1801.61		0.975	11472.4	0.975	5843.14	0.975	3119.41
	1.56	13334.2	1.56	4310.22	1.56	3650.81		2.21	12626	2.21	3343.11	2.21	4728.89		0.13	9574.22	0.13	2304.75	0.13	1779.22		1.04	11478	1.04	5904.26	1.04	3118.56
	1.625	12786.5	1.625	4152.22	1.625	3691.44		2.275	12623.9	2.275	3268.56	2.275	4661.78		0.195	9835.98	0.195	2426.2	0.195	1946.78		1.105	11502.8	1.105	5851.88	1.105	3214.5
	1.69	12380.9	1.69	4000.31	1.69	3650.37		2.34	12511	2.34	3463	2.34	4608		0.26	9880.25	0.26	2365.44	0.26	1922.69		1.17	11604.5	1.17	5812.15	1.17	3299.36
	1.755	12234	1.755	3867.59	1.755	3660.03									0.325	10321.8	0.325	2603.59	0.325	1939.97		1.235	11733.2	1.235	5625.31	1.235	3321.31
	1.82	12179	1.82	3793.35	1.82	3559.09		0	12605	0	3976	0	4691		0.39	10274.7	0.39	2650.88	0.39	2067.03		1.3	11694.6	1.3	5342.92	1.3	3326.67
	1.885	12162.4	1.885	3747.73	1.885	3449.35		0.065	12420.2	0.065	3909.22	0.065	4751.33		0.455	10569.1	0.455	2765.47	0.455	2007.83		1.365	11636.4	1.365	5193.43	1.365	3378.26
	1.95	11851.2	1.95	3650.39	1.95	3273.66		0.13	12800	0.13	4044	0.13	4898		0.52	10236.9	0.52	2886.75	0.52	1987		1.43	11710.7	1.43	5060.34	1.43	3428.88
	2.015	11651	2.015	3500	2.015	3213		0.195	12698.7	0.195	4303.83	0.195	5097		0.585	10986.4	0.585	2918.09	0.585	1975.72		1.495	11831.5	1.495	5066.71	1.495	3518.85
								0.26	12610.8	0.26	4354.78	0.26	5185.44		0.65	12069.8	0.65	2976.56	0.65	1981.97		1.56	12087.9	1.56	5174.13	1.56	3509.34
	0	13807	0	4727	0	3846		0.325	12784.3	0.325	4751.33	0.325	5353.89		0.715	13165.7	0.715	2957.77	0.715	1781.44		1.625	12067.5	1.625	5181.59	1.625	3489.66
	0.065	13974.3	0.065	4782	0.065	3761		0.39	12860.3	0.39	4969.67	0.39	5173		0.78	13501.8	0.78	3121	0.78	1752.06		1.69	11592.8	1.69	5245.24	1.69	3488.54
	0.13	14433.6	0.13	4735.37	0.13	3840.44		0.455	12915.6	0.455	5473.56	0.455	5070.56		0.845	13342.3	0.845	2983.33	0.845	1820.78		1.755	11160.1	1.755	5218.91	1.755	3434.45
	0.195	14395.9	0.195	4864.51	0.195	3750.71		0.52	13436.8	0.52	5849.11	0.52	5263.56		0.91	12654.7	0.91	2947.09	0.91	1764.12		1.82	11035.1	1.82	5089.34	1.82	3424.37
	0.26	13997.6	0.26	4942.73	0.26	3771.49		0.585	13916.5	0.585	6170.5	0.585	4987.5		0.975	12640.7	0.975	2846.31	0.975	1834.86		1.885	11095.1	1.885	4997.12	1.885	3400.71
	0.325	13895.9	0.325	5116.59	0.325	3843.12		0.65	14299.9	0.65	6353	0.65	4925		1.04	12616.8	1.04	2888.25	1.04	1831.25		1.95	11259.2	1.95	4798.62	1.95	3374.65
	0.39	14186.1	0.39	5137.32	0.39	4026.66		0.715	14725.7	0.715	6657.11	0.715	4833.94		1.105	12971.8	1.105	2804.28	1.105	1918.89		2.015	11353.9	2.015	4655.58	2.015	3374.11
	0.455	14208.7	0.455	5104.85	0.455	4336		0.78	14755	0.78	6798	0.78	4948.33		1.17	12448.9	1.17	2814.84	1.17	1875		2.08	11200.1	2.08	4571.87	2.08	3261.93
	0.52	13966.1	0.52	5182.93	0.52	4268.68		0.845	13968.8	0.845	6604.11	0.845	4834		1.235	12019.1	1.235	2682	1.235	2005.33		2.145	11186.2	2.145	4562.65	2.145	3256.28
	0.585	14213	0.585	5268.37	0.585	4441.51		0.91	13473.2	0.91	6549.44	0.91	4920.22		1.3	11322.8	1.3	2611.88	1.3	2042.5		2.21	11322.4	2.21	4613.81	2.21	3218.81
	0.65	14506.8	0.65	5417.63	0.65	4609.07		0.975	13557.2	0.975	6374.33	0.975	4957		1.365	10743.9	1.365	2589.05	1.365	2211.45
	0.715	14637.4	0.715	5403.71	0.715	4742.59		1.04	13808	1.04	6535.11	1.04	4747.89		1.43	10110.5	1.43	2406.19	1.43	2281.53		0	9748	0	3402	0	3512
	0.78	14693.7	0.78	5528.85	0.78	4438.95		1.105	14138	1.105	6337.22	1.105	4887.06		1.495	10417.4	1.495	2445.44	1.495	2355.56		0.065	9949.41	0.065	3574.58	0.065	3479.16
	0.845	14945.9	0.845	5656.46	0.845	4120.88		1.17	14304	1.17	6091	1.17	4770		1.56	10637.4	1.56	2328	1.56	2231.12		0.13	9894.55	0.13	3646.95	0.13	3620.74
	0.91	15159.6	0.91	5836.44	0.91	3991.8		1.235	14060.7	1.235	5687.61	1.235	4763.67		1.625	10002.5	1.625	2293.19	1.625	2225.34		0.195	9746.93	0.195	3742.45	0.195	3636.95
	0.975	15731.3	0.975	5808.17	0.975	3744.15		1.3	14113.6	1.3	5609.11	1.3	4966.89		1.69	9804	1.69	2345.22	1.69	2165.62		0.26	9859.01	0.26	3891.96	0.26	3876.62
	1.04	16305	1.04	5928.07	1.04	3684.88		1.365	14106.2	1.365	5309.33	1.365	5023.67		1.755	9627.48	1.755	2359.8	1.755	2064.7		0.325	9890.68	0.325	4157.46	0.325	3957.35
	1.105	17046.8	1.105	5931.66	1.105	3697.37		1.43	13852.1	1.43	4971.89	1.43	5067.44		1.82	9324.5	1.82	2185.12	1.82	2028.12		0.39	10108.9	0.39	4468.82	0.39	3650.55
	1.17	16912.5	1.17	6046.24	1.17	3567.05		1.495	13793.7	1.495	4822	1.495	5451.44		1.885	9232.19	1.885	2321.47	1.885	1834.09		0.455	10264.5	0.455	4735.03	0.455	3736.13
	1.235	17548.2	1.235	6082.1	1.235	3505.88		1.56	14262.3	1.56	4427	1.56	5414.67		1.95	9814.59	1.95	2362.69	1.95	1901.09		0.52	10393.3	0.52	5052.11	0.52	3543.97
	1.3	17776	1.3	5963.73	1.3	3463.34		1.625	14546.8	1.625	4160	1.625	5485		2.015	10034.7	2.015	2298.3	2.015	1807.64		0.585	10782.9	0.585	5264.16	0.585	3513.32
	1.365	17492.9	1.365	5952.54	1.365	3457.71		1.69	14662.4	1.69	4147.78	1.69	5504.78		2.08	10154	2.08	2324	2.08	1913		0.65	10819.1	0.65	5429.25	0.65	3335.38
	1.43	17302.9	1.43	5991.61	1.43	3480.59		1.755	14214.5	1.755	4036.5	1.755	5429.5									0.715	11239.8	0.715	5756.72	0.715	3221.83
	1.495	16633.2	1.495	5883.88	1.495	3393.17		1.82	13371.3	1.82	3838.78	1.82	5280.33		0	8998.5	0	2321.25	0	1812.25		0.78	11744.1	0.78	6023.64	0.78	3360.18
	1.56	16306.7	1.56	5797.76	1.56	3439.37		1.885	13344.7	1.885	3699.67	1.885	5270.44		0.065	9057.35	0.065	2307.38	0.065	1785.77		0.845	11551.2	0.845	6101.82	0.845	3208.66
	1.625	15934.7	1.625	5999	1.625	3357.41		1.95	13664	1.95	3798.33	1.95	5064.33		0.13	9191.76	0.13	2308.18	0.13	1786.41		0.91	11571.7	0.91	6183.26	0.91	3162.08
	1.69	16174	1.69	5890.85	1.69	3377.15		2.015	13980	2.015	3688.39	2.015	5096.94		0.195	9344.08	0.195	2358.61	0.195	1855.49		0.975	11500.9	0.975	6298.07	0.975	3138.07
	1.755	15418.4	1.755	5776.2	1.755	3491.66		2.08	14572	2.08	3725.78	2.08	4999.22		0.26	9671.24	0.26	2434.76	0.26	1858.78		1.04	11395.8	1.04	6470.05	1.04	3121.23
	1.82	14902.2	1.82	5461.24	1.82	3631.95		2.145	14012.3	2.145	3681.83	2.145	5022.17		0.325	10083.3	0.325	2502.33	0.325	1886.58		1.105	11340.5	1.105	6456.66	1.105	3137.89
	1.885	14340	1.885	5294.71	1.885	3717.54		2.21	13663.6	2.21	3719.44	2.21	4858.67		0.39	10636.7	0.39	2629.53	0.39	1950.68		1.17	11288.5	1.17	6550.55	1.17	3096.73
	1.95	14279.3	1.95	5167.71	1.95	3836.39		2.275	13416	2.275	3668	2.275	5152.22		0.455	11121.4	0.455	2771.12	0.455	2006.66		1.235	11371.6	1.235	6398.13	1.235	3086.72
	2.015	14288.2	2.015	4878.15	2.015	3870.9		2.34	13426	2.34	3580	2.34	4976		0.52	11399	0.52	2838.79	0.52	2031.23		1.3	11489.4	1.3	6435.25	1.3	3101.11
	2.08	13967.2	2.08	4931.9	2.08	3984.51									0.585	11437.7	0.585	2941.4	0.585	2070.14		1.365	11653.9	1.365	6388.14	1.365	3283.32
	2.145	14002.2	2.145	4821.02	2.145	3798.78		0	10294	0	3608	0	3277		0.65	11258.4	0.65	2962.47	0.65	2050.76		1.43	11689.8	1.43	6280.11	1.43	3344.22
	2.21	14233.3	2.21	4748.32	2.21	3839.29		0.065	10224.7	0.065	3557.53	0.065	3385.21		0.715	11480.4	0.715	2885.19	0.715	1976.1		1.495	11487.7	1.495	6118	1.495	3433.26
	2.275	14111	2.275	4791.41	2.275	3719.22		0.13	10013.5	0.13	3592.37	0.13	3384.05		0.78	12300.3	0.78	2801.76	0.78	1885.68		1.56	11444.5	1.56	5806.55	1.56	3474
	2.34	13753.6	2.34	4617.32	2.34	3590		0.195	10307.8	0.195	3703.79	0.195	3537.32		0.845	13330.6	0.845	2774.52	0.845	1843.68		1.625	11256.6	1.625	5444.34	1.625	3425.03
	2.405	13953.9	2.405	4648.56	2.405	3677.71		0.26	10359	0.26	3809.37	0.26	3786		0.91	13802.6	0.91	2805.03	0.91	1832.56		1.69	11353	1.69	5264.86	1.69	3353
	2.47	13647.4	2.47	4710.73	2.47	3718.46		0.325	10306.7	0.325	3961.58	0.325	3956.74		0.975	13443.3	0.975	2727.43	0.975	1763.74		1.755	11263.8	1.755	4974.84	1.755	3177.86
	2.535	13843.4	2.535	4776.88	2.535	3754.24		0.39	10225	0.39	4217.58	0.39	4030.74		1.04	12925.6	1.04	2708.85	1.04	1712.38		1.82	11097	1.82	4785.63	1.82	3067.84
	2.6	14303.6	2.6	4739.05	2.6	3813.12		0.455	10499.3	0.455	4483.68	0.455	4313.42		1.105	12604.1	1.105	2791.75	1.105	1762		1.885	10907.6	1.885	4603.96	1.885	3083.28
	2.665	14442	2.665	4612	2.665	3808		0.52	10974.1	0.52	4896.21	0.52	4350.32		1.17	11992.7	1.17	2742.24	1.17	1857.18		1.95	10736.6	1.95	4441	1.95	3043
	HeLa_tetCENPBmCRMI1_STB-MG132_+Dox_BI2536_BLM-RFP-BubR1-15.czi							0.585	10776.3	0.585	5094.05	0.585	4107.47		1.235	11266.9	1.235	2695.57	1.235	1868.54		2.015	10468.1	2.015	4298.53	2.015	3028.38
								0.65	11230	0.65	5614.95	0.65	3889.68		1.3	10772	1.3	2729.65	1.3	1897.53		2.08	10332	2.08	4180.6	2.08	3101.41
	0	13410	0	3131	0	5028		0.715	11568.3	0.715	5921.95	0.715	3655.84		1.365	10385.5	1.365	2715.14	1.365	1967.96		2.145	10539	2.145	4009	2.145	3072.75
	0.065	13728.1	0.065	3053.12	0.065	5012.4		0.78	12473.4	0.78	6097.95	0.78	3501.16		1.43	10280.3	1.43	2634.18	1.43	2123.74
	0.13	13551.5	0.13	3040.56	0.13	4885.81		0.845	12594	0.845	6333.11	0.845	3623.11		1.495	10059.6	1.495	2577.15	1.495	2200.22		0	8950.5	0	3277.5	0	2614
	0.195	13367.5	0.195	3115.5	0.195	4909.89		0.91	12717.7	0.91	6804.21	0.91	3570.16		1.56	9830.6	1.56	2531.54	1.56	2224.72		0.065	8841.33	0.065	3191.25	0.065	2551.5
	0.26	13208.2	0.26	3082.2	0.26	4910.84		0.975	12428.5	0.975	6480.26	0.975	3656.84		1.625	9914.01	1.625	2497.77	1.625	2213.69		0.13	9056.8	0.13	3309.52	0.13	2680.95
	0.325	13141.2	0.325	3077.25	0.325	4922		1.04	12562	1.04	6616	1.04	3368.95		1.69	9771.03	1.69	2428.62	1.69	2198.18		0.195	8960.89	0.195	3299.14	0.195	2751.02
	0.39	13473.3	0.39	3105.26	0.39	5046.97		1.105	12880.2	1.105	6338.47	1.105	3554.37		1.755	9428.63	1.755	2338.07	1.755	2198.93		0.26	8891.46	0.26	3367.68	0.26	2857.32
	0.455	13607.4	0.455	3161.16	0.455	5143.41		1.17	13782.2	1.17	6557	1.17	3601.68		1.82	9198.32	1.82	2338.81	1.82	2120.91		0.325	9391.11	0.325	3556.86	0.325	2865.39
	0.52	13765.2	0.52	3159.84	0.52	5339.56		1.235	15010	1.235	6650	1.235	3573		1.885	9075.9	1.885	2271.22	1.885	2003.34		0.39	9420.24	0.39	3692.43	0.39	2901.68
	0.585	13964.8	0.585	3186.27	0.585	5657.85		1.3	15848.8	1.3	6746.21	1.3	3681.16		1.95	8991.65	1.95	2193.85	1.95	1897.79		0.455	8836.49	0.455	3894.66	0.455	2797.33
	0.65	14237	0.65	3320	0.65	5720		1.365	15392	1.365	6721.95	1.365	3614.84		2.015	9011.61	2.015	2232.13	2.015	1898.32		0.52	8914.94	0.52	4034.33	0.52	2787.36
	0.715	14346	0.715	3464.46	0.715	5509.99		1.43	14857.2	1.43	6952.11	1.43	3615.37		2.08	9237.74	2.08	2310.53	2.08	1826.09		0.585	9341.53	0.585	4187.03	0.585	2666.47
	0.78	14671.9	0.78	3730.12	0.78	5188.02		1.495	14493.9	1.495	7054.37	1.495	3671.74		2.145	9578.61	2.145	2323.83	2.145	1773.98		0.65	10203.8	0.65	4590.56	0.65	2573.67
	0.845	14999.4	0.845	3888.78	0.845	5037.06		1.56	14453.3	1.56	6860.68	1.56	3737.89		2.21	9905	2.21	2403	2.21	1860		0.715	11038.1	0.715	4854.78	0.715	2492.45
	0.91	15649.2	0.91	3982.12	0.91	5038.97		1.625	14262.3	1.625	6754.42	1.625	3841.79									0.78	11025	0.78	5013.89	0.78	2489.67
	0.975	15482.8	0.975	3995.75	0.975	4800.12		1.69	14067	1.69	6122.37	1.69	3998.89		HeLa_tetCENPBmCRMI1_STB-MG132_+Dox_RO3306_BLM-RFP-BubR1-20.czi							0.845	10758.8	0.845	5235.91	0.845	2425.56
	1.04	15725.2	1.04	4023.24	1.04	4967.48		1.755	13725.7	1.755	5876.47	1.755	4296.74		0	8128.75	0	5222.25	0	1628.5		0.91	10478.3	0.91	5385.74	0.91	2433.19
	1.105	16162.1	1.105	4035.13	1.105	4808.3		1.82	13269.8	1.82	5596.89	1.82	4436.58		0.065	8591.36	0.065	5497.7	0.065	1619.11		0.975	10240.7	0.975	5377.11	0.975	2505.23
	1.17	16354.9	1.17	3958.35	1.17	4875.83		1.885	12914.5	1.885	5253.89	1.885	4438.95		0.13	8935.54	0.13	5553.26	0.13	1605.46		1.04	10220.9	1.04	5367.14	1.04	2505.54
	1.235	16656.6	1.235	3943.01	1.235	4974.26		1.95	13161	1.95	5061	1.95	4181		0.195	9142.91	0.195	5558.47	0.195	1683.53		1.105	10428.8	1.105	5354.66	1.105	2483.75
	1.3	16740	1.3	3906	1.3	4945		2.015	13449.7	2.015	4782.63	2.015	4130.11		0.26	9253.58	0.26	5535.28	0.26	1665.62		1.17	10327.5	1.17	5369.88	1.17	2438.62
	1.365	16562.4	1.365	3871.97	1.365	4902.02		2.08	13407.6	2.08	4811.95	2.08	3922.05		0.325	9585	0.325	5510.85	0.325	1713.07		1.235	10036.9	1.235	5345.22	1.235	2423.37
	1.43	16441.9	1.43	3779.12	1.43	4848.15		2.145	13421.5	2.145	4819.42	2.145	3929.11		0.39	10188.3	0.39	5425.82	0.39	1762.25		1.3	9778.96	1.3	5351.11	1.3	2459.76
	1.495	16209	1.495	3793.27	1.495	4833.6		2.21	13573.7	2.21	4691.21	2.21	3955.68		0.455	10611.1	0.455	5450.27	0.455	1725.3		1.365	9481.12	1.365	5227.25	1.365	2481.6
	1.56	16285	1.56	3940.2	1.56	4989.4		2.275	13457	2.275	4590.84	2.275	4145.26		0.52	10360.2	0.52	5648.34	0.52	1628.82		1.43	9384.96	1.43	5069.72	1.43	2482.13
	1.625	16831.8	1.625	3865.75	1.625	4984.12		2.34	13283.2	2.34	4261.58	2.34	4087.47		0.585	9850.94	0.585	5871.95	0.585	1576.25		1.495	9047.82	1.495	4961.23	1.495	2462.2
	1.69	17244.7	1.69	3978.83	1.69	5015.09		2.405	13051.3	2.405	4258.21	2.405	4142.37		0.65	9428.75	0.65	5747.7	0.65	1514.54		1.56	8686.33	1.56	4663.78	1.56	2332.44
	1.755	17823.9	1.755	3716.79	1.755	5105.28		2.47	13448	2.47	3855	2.47	4112		0.715	9407	0.715	5834	0.715	1461.75		1.625	8404.83	1.625	4357.59	1.625	2500.7
	1.82	17600.2	1.82	3831.48	1.82	5162.56		HeLa_tetCENPBmCRMI1_STB-MG132_+Dox_BLM-RFP-BubR1-15.czi							0.78	9285.61	0.78	5785.62	0.78	1519.78		1.69	8194.97	1.69	4159.13	1.69	2641.6
	1.885	16558.1	1.885	3586.59	1.885	5369.54									0.845	9139.68	0.845	5661.48	0.845	1519.88		1.755	7983.56	1.755	3929.28	1.755	2677.16
	1.95	14961.5	1.95	3348.75	1.95	5557.75		0	10756.2	0	4572.83	0	3004.75		0.91	9392.41	0.91	5528.6	0.91	1518.46		1.82	7799.81	1.82	3671.02	1.82	2663.26
	2.015	14414.7	2.015	3195	2.015	5438.07		0.065	10635.5	0.065	4732.69	0.065	3043.72		0.975	9448.26	0.975	5600.3	0.975	1476.26		1.885	7928.55	1.885	3603.36	1.885	2628.38
	2.08	13968.7	2.08	3133.96	2.08	5325.84		0.13	10386.2	0.13	4650.22	0.13	3126.14		1.04	9385.46	1.04	5777.38	1.04	1473.24		1.95	7957.51	1.95	3477.28	1.95	2500.88
	2.145	13967.5	2.145	3063.02	2.145	5240.93		0.195	10332.8	0.195	4939.43	0.195	3248.66		1.105	9450.33	1.105	5978.15	1.105	1492.04		2.015	8017.85	2.015	3357.44	2.015	2448.05
	2.21	14250	2.21	3006.89	2.21	5163.55		0.26	10610.2	0.26	5034.39	0.26	3362		1.17	9736.18	1.17	6085.69	1.17	1456.01		2.08	7796.78	2.08	3273.23	2.08	2309.58
	2.275	14595.4	2.275	2979	2.275	5058.5		0.325	10615.1	0.325	5146.34	0.325	3519.18		1.235	10206.8	1.235	6120.63	1.235	1497.26		2.145	7746.73	2.145	3283.02	2.145	2407.93
	2.34	15230.6	2.34	2958.8	2.34	5109.36		0.39	10710.9	0.39	5569.59	0.39	3616.97		1.3	10537.3	1.3	6155.07	1.3	1542.8		2.21	7959.75	2.21	3155.98	2.21	2375.19
	2.405	15431.7	2.405	2927.61	2.405	5107.82		0.455	10902.5	0.455	5736.2	0.455	3525.76		1.365	10390.3	1.365	5984.21	1.365	1620.52		2.275	8068.57	2.275	3219.05	2.275	2370.11
	2.47	14908.7	2.47	2924.43	2.47	5087.7		0.52	10939.8	0.52	5886.09	0.52	3429.83		1.43	10146.1	1.43	5759.75	1.43	1684.88		2.34	8040	2.34	3277	2.34	2399
	2.535	13767.9	2.535	2839.13	2.535	5080.94		0.585	10876.3	0.585	6132.18	0.585	3215.65		1.495	9962.25	1.495	5598.52	1.495	1862.59		HeLa_tetCENPBmCRMI1_STB-MG132_+Dox_AZD1152_BLM-RFP-BubR1-11.czi
	2.6	13936	2.6	2856	2.6	5160		0.65	10835.3	0.65	6396.18	0.65	2979.94		1.56	9701.15	1.56	5501.24	1.56	1928.37
								0.715	11352.5	0.715	6517.39	0.715	2860.71		1.625	9326.04	1.625	5314.52	1.625	1993.18		0	9770	0	2584.5	0	2682
	0	12014	0	2522	0	4391		0.78	12001.1	0.78	6631.41	0.78	2777.37		1.69	8876.47	1.69	5075.1	1.69	2062.46		0.065	9998.5	0.065	2614.85	0.065	2689.72
	0.065	12230.7	0.065	2637.32	0.065	4405.22		0.845	12525.3	0.845	6551.81	0.845	2934.17		1.755	8546.75	1.755	4926.59	1.755	1964.56		0.13	10034.2	0.13	2673.27	0.13	2745.27
	0.13	12590.4	0.13	2641.89	0.13	4664.91		0.91	12270	0.91	6453.13	0.91	2871.12		1.82	8429.26	1.82	4708.7	1.82	1845.24		0.195	10015.4	0.195	2814.77	0.195	2852.52
	0.195	12800.6	0.195	2612.27	0.195	4747.37		0.975	11901.8	0.975	6426.68	0.975	2846.42		1.885	8336.4	1.885	4600.92	1.885	1806.31		0.26	10215.6	0.26	2750.88	0.26	2771.42
	0.26	13065	0.26	2705.53	0.26	4881.4		1.04	11626.2	1.04	6409.74	1.04	2955.38		1.95	8571.57	1.95	4339.76	1.95	1809.27		0.325	9968.6	0.325	3020.6	0.325	3095.85
	0.325	13431.6	0.325	2744.2	0.325	5051.67		1.105	11593.7	1.105	6250.06	1.105	3061.36		2.015	8613.64	2.015	4369.23	2.015	1736.01		0.39	10284.5	0.39	3230.3	0.39	3187.57
	0.39	13386	0.39	2832.55	0.39	5320.65		1.17	11343	1.17	6097.71	1.17	3121.51		2.08	8734.73	2.08	4393.51	2.08	1726.88		0.455	10486.2	0.455	3337.3	0.455	3031.99
	0.455	13433	0.455	2860.55	0.455	5463.61		1.235	11093.4	1.235	6180.69	1.235	3152.56		2.145	8714.75	2.145	4269	2.145	1840.88		0.52	10530.6	0.52	3398.6	0.52	2965.32
	0.52	13549.8	0.52	2922.11	0.52	5536.48		1.3	11021	1.3	5934.08	1.3	3338.88									0.585	10559	0.585	3544.95	0.585	2945.94
	0.585	13776.5	0.585	3035.36	0.585	5369.52		1.365	10765.8	1.365	5676.35	1.365	3577.48		0	9383	0	4054.83	0	1415.83		0.65	10722.2	0.65	3634.7	0.65	2889.42
	0.65	14105.7	0.65	3154.91	0.65	5286.26		1.43	10286.2	1.43	5462.16	1.43	3767.37		0.065	9808.96	0.065	4100.72	0.065	1525		0.715	10978.6	0.715	3675.26	0.715	2767.08
	0.715	14045.7	0.715	3164.33	0.715	5159		1.495	9705.05	1.495	5212.12	1.495	3835.33		0.13	9809.43	0.13	4022.39	0.13	1602.96		0.78	10562.4	0.78	3710.66	0.78	2784.47
	0.78	13678.1	0.78	3386.05	0.78	5036.51		1.56	9685.31	1.56	5091.71	1.56	3882.66		0.195	9533.6	0.195	4034.08	0.195	1673.12		0.845	10468	0.845	3733	0.845	2745
	0.845	13907.5	0.845	3464	0.845	4914.66		1.625	9758.52	1.625	4876.86	1.625	3793.39		0.26	8948.04	0.26	3997.83	0.26	1810.22		0.91	10448	0.91	3753.82	0.91	2639.47
	0.91	14502.6	0.91	3625.8	0.91	4735.53		1.69	9912.35	1.69	4647.03	1.69	3703.71		0.325	8405.51	0.325	4103.33	0.325	1847.05		0.975	10241.6	0.975	3680.21	0.975	2751.51
	0.975	15747.9	0.975	3486.88	0.975	4692.42		1.755	9967.63	1.755	4422.67	1.755	3444.06		0.39	8297.6	0.39	4252.8	0.39	1891.05		1.04	10292.9	1.04	3690.2	1.04	2750.63
	1.04	16600.5	1.04	3506.45	1.04	4707.45		1.82	10144.5	1.82	4386.31	1.82	3361.77		0.455	8509.14	0.455	4484.36	0.455	1826.03		1.105	10347.4	1.105	3827.04	1.105	2845.83
	1.105	16854.3	1.105	3507.83	1.105	4773.19		1.885	10439.6	1.885	4286.02	1.885	3319.21		0.52	8655.28	0.52	4738.11	0.52	1708.38		1.17	10525.1	1.17	3985.38	1.17	2900.8
	1.17	16378.6	1.17	3419.31	1.17	4759.15		1.95	10922.7	1.95	4210.67	1.95	3167.37		0.585	8840.33	0.585	5006.5	0.585	1711.02		1.235	10544.8	1.235	4044.62	1.235	2881.62
	1.235	15617.4	1.235	3501.58	1.235	4713.41		2.015	11308.8	2.015	4201.44	2.015	3048.5		0.65	9008.82	0.65	5105.33	0.65	1581.68		1.3	10858.7	1.3	4132.39	1.3	3000.73
	1.3	15083	1.3	3596.37	1.3	4784.47		2.08	11639.9	2.08	4149.41	2.08	3091.35		0.715	9162.62	0.715	5167.23	0.715	1495.55		1.365	10880.1	1.365	4280.05	1.365	2996.71
	1.365	15127.2	1.365	3526.74	1.365	4996.36		2.145	11464.6	2.145	4036.48	2.145	3066.86		0.78	9181.17	0.78	5211.13	0.78	1448.32		1.43	11436.2	1.43	4373.48	1.43	2897.15
	1.43	14982	1.43	3565.67	1.43	5082		2.21	11162	2.21	4071.5	2.21	2980.67		0.845	8749.33	0.845	5076.01	0.845	1463.38		1.495	11471.1	1.495	4319.31	1.495	2802.74
	1.495	14652.3	1.495	3568.91	1.495	5107.76									0.91	8499.73	0.91	4936.93	0.91	1491.13		1.56	11686.3	1.56	4346.15	1.56	2801.89
	1.56	14197.4	1.56	3429.47	1.56	5215.55		0	8944.5	0	3474.25	0	2416.25		0.975	8463.34	0.975	4743.55	0.975	1451.64		1.625	11956.2	1.625	4207.86	1.625	2864.65
	1.625	13741.1	1.625	3157.32	1.625	5143.54		0.065	9011.1	0.065	3430.65	0.065	2377.68		1.04	8334.09	1.04	4656.89	1.04	1479.62		1.69	11882	1.69	4206.5	1.69	2935.5
	1.69	13407.2	1.69	2889.87	1.69	5071.46		0.13	9258	0.13	3432.28	0.13	2344.06		1.105	8334.95	1.105	4524.79	1.105	1435.77		1.755	11735.6	1.755	4064.78	1.755	3010.42
	1.755	12931.2	1.755	2743.81	1.755	4963.6		0.195	9256.81	0.195	3491.79	0.195	2435.35		1.17	8129.43	1.17	4439.5	1.17	1419.24		1.82	11705.5	1.82	3932.94	1.82	3172.59
	1.82	12675.8	1.82	2601.45	1.82	4676.3		0.26	9303.08	0.26	3486.17	0.26	2581.63		1.235	8284.03	1.235	4613.16	1.235	1576.69		1.885	11988.7	1.885	3676	1.885	3227.49
	1.885	12697.6	1.885	2633.79	1.885	4609.58		0.325	8940.53	0.325	3592.26	0.325	2800.91		1.3	8093.94	1.3	4815.95	1.3	1423.3		1.95	12180.3	1.95	3403.99	1.95	3397.39
	1.95	12561	1.95	2543.36	1.95	4678.17		0.39	8808.29	0.39	3832.55	0.39	3015.03		1.365	7907.62	1.365	4878.53	1.365	1456.75		2.015	12045.6	2.015	3251.75	2.015	3317.57
	2.015	12482.7	2.015	2520.93	2.015	4579.13		0.455	8789.66	0.455	3979.84	0.455	3004.79		1.43	7802.46	1.43	4809.35	1.43	1514.09		2.08	11730.9	2.08	3201.11	2.08	3343.98
	2.08	12456	2.08	2565.62	2.08	4613.87		0.52	8654.34	0.52	4286.1	0.52	2949.89		1.495	7951.62	1.495	4740.58	1.495	1552.51		2.145	11369.7	2.145	3051.84	2.145	3240.41
	2.145	12433	2.145	2545	2.145	4648		0.585	8671.49	0.585	4400.8	0.585	2684.4		1.56	8146.91	1.56	4703.52	1.56	1610.92		2.21	11129.6	2.21	2943.26	2.21	3096.31
								0.65	8428.38	0.65	4428.67	0.65	2530.33		1.625	8359.39	1.625	4743.88	1.625	1639.5		2.275	11031.8	2.275	2855.73	2.275	3048.69
	0	13035	0	2827	0	4547		0.715	8325.26	0.715	4520.48	0.715	2415.09		1.69	8169.11	1.69	4567.33	1.69	1695.47		2.34	10896.6	2.34	2778.42	2.34	3115.36
	0.065	12933.9	0.065	2889.43	0.065	4467.68		0.78	8254.1	0.78	4565.87	0.78	2339.37		1.755	8243.44	1.755	4341.35	1.755	1779.33		2.405	10867.1	2.405	2667.2	2.405	3182.14
	0.13	12737.9	0.13	2950.73	0.13	4585.66		0.845	8212	0.845	4617.4	0.845	2346.73		1.82	8479.03	1.82	4319.37	1.82	1880.06		2.47	11032.8	2.47	2734.3	2.47	3090.04
	0.195	12682.1	0.195	2849.8	0.195	4724.63		0.91	8258.52	0.91	4529.69	0.91	2401.7		1.885	8380.29	1.885	4114.81	1.885	1868.66		2.535	10974	2.535	2726	2.535	3013
	0.26	12729.9	0.26	2903.03	0.26	4643.42		0.975	8479.35	0.975	4538.01	0.975	2416.92		1.95	8579.86	1.95	3925.99	1.95	1912.34
	0.325	12891	0.325	2938.16	0.325	4742.92		1.04	8472.21	1.04	4575.5	1.04	2298.57		2.015	8491.31	2.015	3958	2.015	1718.48		0	8990.5	0	2887.5	0	2514
	0.39	13056.4	0.39	2853.53	0.39	4978.77		1.105	8774.56	1.105	4621.56	1.105	2289.61		2.08	8294.48	2.08	3749.09	2.08	1669.77		0.065	8936.58	0.065	2910.62	0.065	2489.6
	0.455	13153.6	0.455	2898.03	0.455	5158.18		1.17	8752.48	1.17	4609	1.17	2364.51		2.145	7905.99	2.145	3775.35	2.145	1595.36		0.13	9177.58	0.13	2778.32	0.13	2396.75
	0.52	13318.8	0.52	3065.12	0.52	5223.33		1.235	8693.5	1.235	4626.05	1.235	2445.5		2.21	7776.67	2.21	3801.16	2.21	1543.88		0.195	9158.76	0.195	2891.97	0.195	2502.67
	0.585	13704	0.585	3245.36	0.585	5282.42		1.3	8709.96	1.3	4639.9	1.3	2427.72		2.275	7911.83	2.275	3757.75	2.275	1554.42		0.26	9281.82	0.26	2884.73	0.26	2558.57
	0.65	14075.2	0.65	3436.65	0.65	5202.23		1.365	8665.35	1.365	4601.97	1.365	2529.83									0.325	9327.64	0.325	3001.75	0.325	2685.06
	0.715	14101.4	0.715	3671.52	0.715	5022.59		1.43	8606.56	1.43	4455.81	1.43	2667.11		0	7756.25	0	4063.56	0	1777.31		0.39	9419.74	0.39	3013.77	0.39	2789.28
	0.78	14181.8	0.78	3861.01	0.78	4984.88		1.495	8487.31	1.495	4388.57	1.495	2838.01		0.065	7909.44	0.065	3999.05	0.065	1852.28		0.455	9418.32	0.455	3053.8	0.455	2791.75
	0.845	14773.7	0.845	3952.2	0.845	4883.11		1.56	8372.64	1.56	4344.26	1.56	3006.49		0.13	7753.95	0.13	4108.2	0.13	1852.89		0.52	9515.21	0.52	3024.11	0.52	2725.31
	0.91	14850.6	0.91	3971.62	0.91	4727.45		1.625	8155.52	1.625	4062.13	1.625	3310.55		0.195	7687.41	0.195	4053.67	0.195	1798.33		0.585	9590.56	0.585	3066.49	0.585	2790.52
	0.975	15186.1	0.975	4007.77	0.975	4644.38		1.69	8253.97	1.69	4053.83	1.69	3582.48		0.26	7777.31	0.26	4299.24	0.26	1919.89		0.65	9460.99	0.65	3085.92	0.65	2752.25
	1.04	15600.7	1.04	4040.49	1.04	4616.35		1.755	8212.66	1.755	3790.52	1.755	3650.05		0.325	7818.29	0.325	4298.98	0.325	1912.81		0.715	9389.8	0.715	3130.15	0.715	2567.41
	1.105	15766.8	1.105	3918.75	1.105	4626.79		1.82	8135.15	1.82	3804.36	1.82	3651.63		0.39	7909.46	0.39	4289.69	0.39	1905.39		0.78	9325.75	0.78	3054.72	0.78	2560.59
	1.17	16123.2	1.17	3931.19	1.17	4628.63		1.885	8247.37	1.885	3811.61	1.885	3390.2		0.455	8098.67	0.455	4311.89	0.455	1856.71		0.845	9565.21	0.845	3158.98	0.845	2706.74
	1.235	16101.5	1.235	3906	1.235	4671.5		1.95	8152.94	1.95	3740.44	1.95	2922.61		0.52	8025.26	0.52	4508.33	0.52	1827.45		0.91	9408.29	0.91	3166.55	0.91	2507.25
	1.3	15939.1	1.3	3803.89	1.3	4747.83		2.015	7978.86	2.015	3669.81	2.015	2609		0.585	8246.64	0.585	4595.18	0.585	1781.04		0.975	9278.48	0.975	3135.03	0.975	2586.82
	1.365	15910.2	1.365	3743.65	1.365	4566.45		2.08	7898.85	2.08	3626.54	2.08	2513.18		0.65	8201.62	0.65	4892.35	0.65	1648.42		1.04	9546.41	1.04	3214.2	1.04	2636.93
	1.43	16109.4	1.43	3730	1.43	4664.07		2.145	7743.68	2.145	3560.43	2.145	2421.72		0.715	8480.32	0.715	4939.76	0.715	1726.77		1.105	9767.56	1.105	3170.95	1.105	2582.84
	1.495	16197.6	1.495	3901.27	1.495	4786.79		2.21	7707.22	2.21	3414.36	2.21	2343.83		0.78	8503.52	0.78	5092.81	0.78	1637.22		1.17	9864.09	1.17	3125.3	1.17	2582.21
	1.56	16226.9	1.56	3811.48	1.56	4814.59									0.845	8654.39	0.845	5152.46	0.845	1580.38		1.235	9586.88	1.235	3186.44	1.235	2521
	1.625	16631.2	1.625	3906.18	1.625	4820.89		0	11586.1	0	4012	0	3832.75		0.91	8731.58	0.91	5245.52	0.91	1518.47		1.3	9501.43	1.3	3270.17	1.3	2487.06
	1.69	16863.8	1.69	3711.7	1.69	4861.2		0.065	11575.3	0.065	3994.77	0.065	3869.77		0.975	8876.8	0.975	5313.28	0.975	1529.94		1.365	9301.37	1.365	3279.4	1.365	2528.03
	1.755	16502.7	1.755	3750.15	1.755	5043.77		0.13	11795.2	0.13	4149.89	0.13	3962.43		1.04	9039.57	1.04	5340.19	1.04	1536.95		1.43	9398.6	1.43	3484.21	1.43	2564.96
	1.82	15812.9	1.82	3410.58	1.82	5268.48		0.195	11848.8	0.195	4150.37	0.195	4176.07		1.105	9059.91	1.105	5464.46	1.105	1597.96		1.495	9369.11	1.495	3571.76	1.495	2579.93
	1.885	14800.7	1.885	3278.52	1.885	5378.14		0.26	11928.7	0.26	4131.85	0.26	4393.01		1.17	8915.13	1.17	5573.76	1.17	1571.41		1.56	9294.22	1.56	3572.97	1.56	2630.95
	1.95	14108.2	1.95	3088.27	1.95	5326.45		0.325	12103.9	0.325	4204	0.325	4412.04		1.235	8825.28	1.235	5488.92	1.235	1477.15		1.625	9628.15	1.625	3512.35	1.625	2607.31
	2.015	13504.7	2.015	2940.41	2.015	5198.09		0.39	12422.5	0.39	4395.42	0.39	4270.67		1.3	9016.16	1.3	5446.81	1.3	1594.96		1.69	10103.5	1.69	3449.31	1.69	2666.78
	2.08	13502	2.08	2894.56	2.08	4982.19		0.455	12538	0.455	4574.54	0.455	4141.19		1.365	8944.4	1.365	5315.45	1.365	1598.79		1.755	10241.5	1.755	3268.95	1.755	2866.68
	2.145	13700	2.145	2796.33	2.145	4868.21		0.52	12340.2	0.52	4747.13	0.52	4054.69		1.43	8567.12	1.43	5208.21	1.43	1638.64		1.82	10066.1	1.82	3218.66	1.82	3090.3
	2.21	13395.2	2.21	2722.27	2.21	4947.39		0.585	11865.5	0.585	4828.24	0.585	3915.62		1.495	8651.22	1.495	5018.86	1.495	1635.71		1.885	9950.02	1.885	3142.42	1.885	3132.75
	2.275	13387.1	2.275	2713.62	2.275	4905.35		0.65	11481.5	0.65	5012.18	0.65	3757.84		1.56	8582.5	1.56	4920.43	1.56	1771.46		1.95	9994.77	1.95	3051.22	1.95	3140.17
	2.34	12979.9	2.34	2706.22	2.34	4886.65		0.715	11424.9	0.715	5003.92	0.715	3596.03		1.625	8471.32	1.625	4908.93	1.625	1817.08		2.015	10150.9	2.015	2875.56	2.015	3036.36
	2.405	13224.3	2.405	2628.63	2.405	4839.26		0.78	11376.4	0.78	5007.43	0.78	3472.86		1.69	8295.53	1.69	4755.07	1.69	1908.86		2.08	10261.1	2.08	2803.02	2.08	2825.62
	2.47	13027	2.47	2605	2.47	4981		0.845	11641.7	0.845	4893.32	0.845	3699.89		1.755	8567.97	1.755	4624.08	1.755	1848.01		2.145	10472.1	2.145	2765.86	2.145	2839.07
								0.91	11571.6	0.91	4911.56	0.91	3620.51		1.82	8512.13	1.82	4347.02	1.82	1780.46		2.21	10532	2.21	2754.24	2.21	2870.55
	0	12405	0	2798	0	3821		0.975	11693.6	0.975	4919.79	0.975	3588.39		1.885	8384.63	1.885	4301.51	1.885	1751.63		2.275	10206.4	2.275	2678.49	2.275	2818.84
	0.065	11945.7	0.065	2924.98	0.065	3833.29		1.04	11887.9	1.04	4946.99	1.04	3603.42		1.95	8196.97	1.95	4206.4	1.95	1644.4		2.34	10185.1	2.34	2619.9	2.34	2787.59
	0.13	12068.8	0.13	2886.03	0.13	3792		1.105	12067.8	1.105	4917.27	1.105	3450.29		2.015	8202.05	2.015	4305.43	2.015	1587.77		2.405	10093.9	2.405	2666.47	2.405	2621.09
	0.195	12230.7	0.195	3061.98	0.195	3690.31		1.17	12018.9	1.17	5015.73	1.17	3580.42		2.08	7953.74	2.08	4083.1	2.08	1552.55		2.47	9924.5	2.47	2626.5	2.47	2755
	0.26	12123.3	0.26	2966.59	0.26	3846.78		1.235	11882.5	1.235	5057.24	1.235	3585.58		HeLa_tetCENPBmCRMI1_STB-MG132_+Dox_RO3306_BLM-RFP-BubR1-24.czi
	0.325	12235	0.325	3137.41	0.325	4018.64		1.3	11876.9	1.3	5218.79	1.3	3494.99									0	10366	0	2836.5	0	2872.5
	0.39	12240.1	0.39	3277.32	0.39	4208.67		1.365	11829.2	1.365	4976.97	1.365	3779.02		0	7260.5	0	2648.38	0	1522.12		0.065	10571.5	0.065	2906.35	0.065	2945.88
	0.455	12914.9	0.455	3307.44	0.455	4389.65		1.43	11945.4	1.43	4922.42	1.43	3911.86		0.065	7295.42	0.065	2672.18	0.065	1588.87		0.13	10928.5	0.13	2904.27	0.13	2957.22
	0.52	13345.2	0.52	3498.6	0.52	4453.8		1.495	12054.4	1.495	4838.83	1.495	3957.92		0.13	7181.06	0.13	2661	0.13	1581.92		0.195	11259	0.195	2943.53	0.195	3055
	0.585	13519.6	0.585	3599.23	0.585	4445.35		1.56	11891.1	1.56	4681.49	1.56	4164.07		0.195	7257.29	0.195	2745.79	0.195	1693.18		0.26	11501	0.26	3212.25	0.26	3143.2
	0.65	13672.6	0.65	3671.44	0.65	4430.81		1.625	11680.7	1.625	4541.99	1.625	4074.36		0.26	7390.62	0.26	2850.38	0.26	1805.68		0.325	11672.4	0.325	3218.21	0.325	3085.13
	0.715	13951.2	0.715	3809.85	0.715	4330.42		1.69	11414.4	1.69	4415.67	1.69	3947.08		0.325	7857.27	0.325	2920.35	0.325	1826.75		0.39	11624.5	0.39	3456.59	0.39	3070.33
	0.78	14246	0.78	3954.16	0.78	4161.79		1.755	11047	1.755	4358.86	1.755	3897.61		0.39	8111.46	0.39	3141.74	0.39	1900.75		0.455	11324.4	0.455	3684.19	0.455	3129.35
	0.845	14481.9	0.845	3943.24	0.845	3981.23		1.82	10499.4	1.82	4194.47	1.82	3528.95		0.455	7997.36	0.455	3376.57	0.455	1884.15		0.52	11470.8	0.52	3809.98	0.52	2952.85
	0.91	14440.3	0.91	4009.2	0.91	3879.08		1.885	10479.2	1.885	4178.24	1.885	3225.89		0.52	8102.15	0.52	3610.19	0.52	1785.24		0.585	11434.4	0.585	3994.35	0.585	2885.12
	0.975	14421.6	0.975	4061.48	0.975	3711.86		1.95	10689	1.95	4022.38	1.95	3055.8		0.585	8392.37	0.585	3750.66	0.585	1631.06		0.65	11411.7	0.65	4076.57	0.65	2837.86
	1.04	14470.2	1.04	4085.84	1.04	3701.96		2.015	10402.6	2.015	4226.77	2.015	3092.71		0.65	8751.27	0.65	3835.42	0.65	1634.94		0.715	11303.1	0.715	4062.07	0.715	2781.82
	1.105	14336.1	1.105	4123.03	1.105	3678.62		2.08	10462.3	2.08	4228.2	2.08	3030.93		0.715	9249.58	0.715	3993.45	0.715	1659.66		0.78	11118.9	0.78	4155.24	0.78	2752.7
	1.17	14172.4	1.17	4047.8	1.17	3616.29		2.145	10372.4	2.145	4223.08	2.145	2977		0.78	9717.08	0.78	3939.79	0.78	1624.7		0.845	10915.7	0.845	4250.44	0.845	2788.94
	1.235	14190.2	1.235	4035.07	1.235	3566.5		HeLa_tetCENPBmCRMI1_STB-MG132_+Dox_BLM-RFP-BubR1-21.czi							0.845	10070.6	0.845	3893.03	0.845	1527.44		0.91	10703.9	0.91	4268.41	0.91	2851.93
	1.3	14397.5	1.3	4019	1.3	3533									0.91	10648.7	0.91	3918.18	0.91	1674.43		0.975	10705.5	0.975	4238.03	0.975	2865.37
	1.365	14625.9	1.365	4025.2	1.365	3620.61		0	10452.2	0	6087.5	0	3609		0.975	10582	0.975	3951.81	0.975	1600.2		1.04	10711.9	1.04	4102.97	1.04	2859.75
	1.43	14912.5	1.43	4046.2	1.43	3677.73		0.065	10445.6	0.065	6202.22	0.065	3510.51		1.04	10483	1.04	3827.77	1.04	1640.15		1.105	10350.1	1.105	3932.76	1.105	2709.15
	1.495	15161.9	1.495	4047.64	1.495	3671.11		0.13	10546.4	0.13	6386.14	0.13	3510.35		1.105	9658.33	1.105	3734.76	1.105	1627.38		1.17	10104.1	1.17	3840.33	1.17	2728.09
	1.56	15279	1.56	4138.96	1.56	3771.56		0.195	10736	0.195	6560.81	0.195	3754.72		1.17	9542.44	1.17	3861.54	1.17	1593		1.235	9966.17	1.235	3844.67	1.235	2687.24
	1.625	15440.6	1.625	4131.89	1.625	3840.81		0.26	10642.8	0.26	6542	0.26	3824.99		1.235	9730.47	1.235	4101.8	1.235	1598.74		1.3	10170.8	1.3	3680.62	1.3	2701.35
	1.69	15801.5	1.69	4038.51	1.69	3944.5		0.325	10692.2	0.325	6876.58	0.325	4087.76		1.3	9962.07	1.3	4282.17	1.3	1602.37		1.365	10476.8	1.365	3552.74	1.365	2708.91
	1.755	16041	1.755	4062.7	1.755	4237.32		0.39	10883.4	0.39	6929.96	0.39	4342.68		1.365	9998.39	1.365	4169.02	1.365	1654.24		1.43	10609.2	1.43	3610.58	1.43	2654.86
	1.82	15844.2	1.82	4212.84	1.82	4431.03		0.455	10914.2	0.455	7161.09	0.455	4453.6		1.43	9636.98	1.43	4122.91	1.43	1692.43		1.495	10788.2	1.495	3578.67	1.495	2671.02
	1.885	15543.9	1.885	4039.29	1.885	4781.19		0.52	10848.9	0.52	7342.47	0.52	4489.56		1.495	9222.73	1.495	4050.99	1.495	1671.53		1.56	10675	1.56	3790.81	1.56	2702.11
	1.95	14830.7	1.95	3865.75	1.95	4899.94		0.585	10993.7	0.585	7362.48	0.585	4459.05		1.56	8942.68	1.56	4044.35	1.56	1620.87		1.625	11146.4	1.625	3765.41	1.625	2740.39
	2.015	14473	2.015	3758.52	2.015	4880.54		0.65	11031.2	0.65	7332.2	0.65	4278.62		1.625	8498.47	1.625	3786.74	1.625	1829.15		1.69	11295.6	1.69	3700.56	1.69	2763.56
	2.08	14735.5	2.08	3687.32	2.08	4772.56		0.715	10988	0.715	7234.5	0.715	4108.06		1.69	8398.8	1.69	3475.06	1.69	1944.52		1.755	11050.5	1.755	3509.36	1.755	2923.95
	2.145	14408.2	2.145	3675.84	2.145	4575.81		0.78	10728.2	0.78	7370.42	0.78	3910		1.755	8416.94	1.755	3336.64	1.755	1961.9		1.82	10782.5	1.82	3367.28	1.82	2969.65
	2.21	14574	2.21	3719.34	2.21	4557.37		0.845	10880.1	0.845	7347.03	0.845	3725.01		1.82	8134.99	1.82	3170.88	1.82	1926.3		1.885	10379.2	1.885	3271.34	1.885	2977.8
	2.275	14755.6	2.275	3557.09	2.275	4264.84		0.91	10718	0.91	7389.6	0.91	3681.18		1.885	8065.64	1.885	3039.37	1.885	1856.96		1.95	10228	1.95	3234.81	1.95	3002.53
	2.34	14585.1	2.34	3430.5	2.34	4351.09		0.975	11076.4	0.975	7479.13	0.975	3600.91		1.95	8131.13	1.95	2971.11	1.95	1814.5		2.015	10065.8	2.015	3006.11	2.015	2992.51
	2.405	14447.6	2.405	3424.25	2.405	4278.67		1.04	11178.2	1.04	7286.17	1.04	3627.65		2.015	8352.97	2.015	2878.58	2.015	1811.89		2.08	10069.2	2.08	2871.5	2.08	2895.28
	2.47	14671.8	2.47	3427.82	2.47	4310.04		1.105	11031.6	1.105	7267.87	1.105	3603.67		2.08	8419.33	2.08	2769.7	2.08	1734.69		2.145	10111.3	2.145	2748.52	2.145	2808.5
	2.535	14514.1	2.535	3389.91	2.535	4315.97		1.17	10990	1.17	7309.52	1.17	3690.23									2.21	9960.7	2.21	2599.2	2.21	2688.09
	2.6	14286	2.6	3344	2.6	4381		1.235	11034.1	1.235	7210.37	1.235	3727.64		0	8697.5	0	2911	0	2039.5		2.275	9931.21	2.275	2631.82	2.275	2600.18
								1.3	11160.8	1.3	7142.03	1.3	3736.07		0.065	8456.48	0.065	2876.92	0.065	2036.62		2.34	10030	2.34	2604.65	2.34	2582.26
	0	12807	0	3351	0	3815		1.365	11182	1.365	7055.05	1.365	3922.68		0.13	8497.02	0.13	3011.42	0.13	2144.67		2.405	9829.8	2.405	2525.05	2.405	2539.47
	0.065	12838	0.065	3242.62	0.065	3905.28		1.43	11290.5	1.43	6824.89	1.43	4011.14		0.195	8539.9	0.195	3087.18	0.195	2236.53		2.47	9635.58	2.47	2542.91	2.47	2609.24
	0.13	12799.3	0.13	3293.72	0.13	3808.43		1.495	10932.6	1.495	6595.46	1.495	4105.09		0.26	8621.17	0.26	3046.05	0.26	2274.68		2.535	9613	2.535	2546	2.535	2584.5
	0.195	12971.6	0.195	3234.76	0.195	3833.49		1.56	11102.7	1.56	6390.52	1.56	4278.77		0.325	8611.72	0.325	3088.15	0.325	2247.43
	0.26	13008.7	0.26	3167.5	0.26	3834.92		1.625	11044.3	1.625	6311.5	1.625	4138.56		0.39	8443.6	0.39	3060.28	0.39	2150.91		0	11765.5	0	4213	0	3229
	0.325	12823.8	0.325	3054	0.325	3851.22		1.69	11204.6	1.69	6243.8	1.69	4033.36		0.455	8670.78	0.455	3343.71	0.455	2038.71		0.065	11829	0.065	4127.96	0.065	3307.96
	0.39	12899.1	0.39	3116.62	0.39	4038.88		1.755	11442.1	1.755	6111.34	1.755	3848.56		0.52	8802.51	0.52	3349.73	0.52	1869.37		0.13	11692.2	0.13	4122.43	0.13	3390.35
	0.455	12754.4	0.455	3195.84	0.455	4281.04		1.82	11457.5	1.82	6007.13	1.82	3658.59		0.585	9129.03	0.585	3433.6	0.585	1813.1		0.195	11672.2	0.195	4022.78	0.195	3465.72
	0.52	12998.3	0.52	3179.56	0.52	4417.76		1.885	11463.4	1.885	6042.09	1.885	3480		0.65	9454.08	0.65	3529.73	0.65	1762.01		0.26	11989.2	0.26	4045.7	0.26	3514.96
	0.585	13324.2	0.585	3347.35	0.585	4638.48		1.95	11246.1	1.95	6079.39	1.95	3396.94		0.715	9907.86	0.715	3540.82	0.715	1716.37		0.325	11312.8	0.325	3716.38	0.325	3863.93
	0.65	14111	0.65	3380.25	0.65	4979.88		2.015	10950.2	2.015	5980.53	2.015	3356.77		0.78	9866.77	0.78	3521.09	0.78	1704.75		0.39	11268.6	0.39	3627.14	0.39	3904.62
	0.715	14809.5	0.715	3368.86	0.715	4963.78		2.08	10643.2	2.08	5934.3	2.08	3065.01		0.845	9367.97	0.845	3607.44	0.845	1711.38		0.455	11417.3	0.455	3514.23	0.455	3807.95
	0.78	14947.2	0.78	3484.88	0.78	4630.56		2.145	10281	2.145	5875.5	2.145	3206		0.91	9303.95	0.91	3616.72	0.91	1715.71		0.52	11267	0.52	3502.15	0.52	3691.24
	0.845	15042.6	0.845	3453.35	0.845	4428.65									0.975	9182.03	0.975	3519.59	0.975	1701.89		0.585	11563.5	0.585	3336.3	0.585	3649.28
	0.91	14979.1	0.91	3509.86	0.91	4400.27		0	11993	0	5577.75	0	3589.5		1.04	9019.32	1.04	3491.88	1.04	1643.06		0.65	11129.3	0.65	3479.05	0.65	3563.09
	0.975	15396.3	0.975	3556.78	0.975	4253.31		0.065	11866.2	0.065	5497.67	0.065	3696.17		1.105	8910.77	1.105	3403.23	1.105	1643.79		0.715	11389.6	0.715	3518.88	0.715	3371.49
	1.04	15759.1	1.04	3475.32	1.04	4273.72		0.13	11502.3	0.13	5558.17	0.13	3839		1.17	8849.69	1.17	3361.05	1.17	1740.51		0.78	11051	0.78	3497.76	0.78	3399.73
	1.105	15498.6	1.105	3470.38	1.105	4318.99		0.195	11278.5	0.195	5632	0.195	4001.5		1.235	8976.68	1.235	3319.46	1.235	1759.59		0.845	11350	0.845	3696.81	0.845	3341.24
	1.17	14857.2	1.17	3470.72	1.17	4017.1		0.26	11102	0.26	5816.67	0.26	4164.75		1.3	8993.15	1.3	3352.01	1.3	1787.03		0.91	11472.5	0.91	3633.18	0.91	3288.04
	1.235	14064.9	1.235	3300.37	1.235	4103.36		0.325	10953.8	0.325	5980.67	0.325	4202.5		1.365	8859.13	1.365	3475.83	1.365	1894.9		0.975	11816.3	0.975	3763.74	0.975	3268.05
	1.3	13624.5	1.3	3269	1.3	4057		0.39	10891.2	0.39	6105	0.39	4101		1.43	8919.47	1.43	3527.03	1.43	1887.77		1.04	11787.4	1.04	3853.65	1.04	3196.85
	1.365	13655.2	1.365	3304.67	1.365	4013		0.455	10906.3	0.455	6341	0.455	3959.83		1.495	8887.72	1.495	3581.43	1.495	1870.3		1.105	11965	1.105	3954.41	1.105	3189.81
	1.43	13650.3	1.43	3299.95	1.43	4078.44		0.52	10896.8	0.52	6536.75	0.52	3804.58		1.56	8719.88	1.56	3797.05	1.56	1980.65		1.17	12102.1	1.17	3948.59	1.17	3222.86
	1.495	13873.8	1.495	3354.06	1.495	4303.32		0.585	10808	0.585	6763	0.585	3703		1.625	8651.94	1.625	3763.68	1.625	1958.6		1.235	13000.9	1.235	4035.86	1.235	3223.53
	1.56	14075	1.56	3362.92	1.56	4279.72		0.65	11068	0.65	6949.58	0.65	3668.92		1.69	8890.52	1.69	3821.56	1.69	2081		1.3	13191.6	1.3	4034.11	1.3	3382.3
	1.625	14154.8	1.625	3356.91	1.625	4454.81		0.715	11318	0.715	7023.83	0.715	3616.83		1.755	8897.79	1.755	3871.26	1.755	2128.06		1.365	13132.8	1.365	4083.2	1.365	3462.04
	1.69	13934.1	1.69	3400.26	1.69	4721.2		0.78	11407.5	0.78	7067	0.78	3525		1.82	8978.89	1.82	4090.47	1.82	2166.88		1.43	13106.2	1.43	4373.78	1.43	3417.55
	1.755	13494.7	1.755	3399.59	1.755	4919.39		0.845	11319.2	0.845	7140.33	0.845	3541.5		1.885	9361.75	1.885	4080.49	1.885	2150.39		1.495	13304.1	1.495	4118.41	1.495	3383.22
	1.82	13457.2	1.82	3215.76	1.82	5343.34		0.91	11422.4	0.91	6936.42	0.91	3533.92		1.95	9600.97	1.95	4000.48	1.95	2097.79		1.56	12997.9	1.56	4153.85	1.56	3478.18
	1.885	13606.6	1.885	3222.41	1.885	5138.69		0.975	11464	0.975	6742.5	0.975	3435		2.015	9600.48	2.015	3908.9	2.015	2016.88		1.625	12873	1.625	4012.77	1.625	3713.97
	1.95	13120.4	1.95	3098.12	1.95	5093.5		1.04	11284.8	1.04	6818.58	1.04	3482.25		2.08	9760.58	2.08	4010.18	2.08	1911.16		1.69	12585	1.69	3607.07	1.69	3823.04
	2.015	12938	2.015	3005.1	2.015	4996.71		1.105	11301.3	1.105	6888.17	1.105	3496.5									1.755	12885.4	1.755	3613.74	1.755	4094.19
	2.08	12626.2	2.08	2865.76	2.08	4715.68		1.17	11330	1.17	6906.75	1.17	3318.25		0	9203.5	0	3529	0	1878.5		1.82	12610.9	1.82	3418.93	1.82	4008.65
	2.145	12677.3	2.145	2756.79	2.145	4576.96		1.235	11481.2	1.235	7091.67	1.235	3199.33		0.065	9079.92	0.065	3591.18	0.065	1968.48		1.885	11898.7	1.885	3245.18	1.885	3982.82
	2.21	12796.5	2.21	2737.11	2.21	4336.37		1.3	11992.2	1.3	7203.92	1.3	3165.92		0.13	8739.25	0.13	3703.02	0.13	1977.77		1.95	11303.1	1.95	3197.61	1.95	4016.82
	2.275	12924.9	2.275	2913.78	2.275	4407.19		1.365	12601.5	1.365	7170.5	1.365	3204.5		0.195	8697.89	0.195	3760.03	0.195	2033.27		2.015	11171.1	2.015	3014.74	2.015	3959.62
	2.34	12840.4	2.34	2810.82	2.34	4272.4		1.43	12496.3	1.43	7324.83	1.43	3238.58		0.26	8972.82	0.26	3609.57	0.26	2090.96		2.08	11139.3	2.08	2963.65	2.08	3843.23
	2.405	12947	2.405	2785.28	2.405	4319.87		1.495	12297.7	1.495	7415.33	1.495	3249.17		0.325	9082.33	0.325	3763.36	0.325	2184.1		2.145	11053	2.145	2844.46	2.145	3556.08
	2.47	13089.3	2.47	2757.84	2.47	4454.44		1.56	12034.5	1.56	7481.75	1.56	3359.75		0.39	9172.03	0.39	4023.85	0.39	2265.38		2.21	11132.7	2.21	2922.78	2.21	3584.62
	2.535	13044.6	2.535	2797.45	2.535	4450.19		1.625	11997.8	1.625	7460.5	1.625	3406.17		0.455	9581.02	0.455	4077.5	0.455	2148.79		2.275	11045.7	2.275	2863.85	2.275	3591.01
	2.6	13135	2.6	2636	2.6	4281		1.69	12358.1	1.69	7253.58	1.69	3427.08		0.52	9613.93	0.52	3971.57	0.52	2097.13		2.34	10879.9	2.34	2777.95	2.34	3497.72
	HeLa_tetCENPBmCRMI1_STB-MG132_+Dox_BI2536_BLM-RFP-BubR1-17.czi							1.755	12522.5	1.755	6946.5	1.755	3485.5		0.585	9739.94	0.585	3990.26	0.585	2065.18		2.405	10868	2.405	2861	2.405	3540
								1.82	12396.6	1.82	6678	1.82	3695.58		0.65	9790.92	0.65	4060.88	0.65	1902.17
	0	10248.8	0	2872.75	0	2917.5		1.885	12069.2	1.885	6447.17	1.885	3922		0.715	9835.09	0.715	4066.45	0.715	1897.02		0	8856	0	2734	0	2609
	0.065	10399.6	0.065	2899.99	0.065	3013.26		1.95	11623	1.95	6140.25	1.95	3940		0.78	9664.16	0.78	4074.87	0.78	1805.27		0.065	8776.35	0.065	2690.5	0.065	2570.5
	0.13	10773	0.13	2942.2	0.13	3120.51		2.015	11155.2	2.015	5938.17	2.015	3867.67		0.845	9644.51	0.845	4071.96	0.845	1764.64		0.13	9011	0.13	2866.39	0.13	2674
	0.195	11098.2	0.195	3010.43	0.195	3429.17		2.08	10574	2.08	5732.83	2.08	3679.33		0.91	9689.08	0.91	4046.51	0.91	1705.91		0.195	8816.96	0.195	2830.54	0.195	2834.46
	0.26	11436.7	0.26	2925.43	0.26	3809.69		2.145	10155.5	2.145	5478.5	2.145	3435		0.975	9719.52	0.975	3956.94	0.975	1728.9		0.26	9109.22	0.26	2909	0.26	2655.78
	0.325	11237.2	0.325	2960.91	0.325	4257.07		2.21	10022.3	2.21	5382.33	2.21	3265.42		1.04	9699.9	1.04	3874.34	1.04	1645.83		0.325	9464.5	0.325	2979.5	0.325	2870.5
	0.39	11146.1	0.39	2997.7	0.39	4654.99		2.275	9869	2.275	5309.5	2.275	3134.83		1.105	10181.8	1.105	3727.6	1.105	1759.01		0.39	9494.17	0.39	3139.58	0.39	2749
	0.455	11297.1	0.455	2969.76	0.455	5009.16		2.34	9791.25	2.34	5317.75	2.34	3086.5		1.17	10462.5	1.17	3626.49	1.17	1807.35		0.455	9499.5	0.455	3242.57	0.455	2820.93
	0.52	11321.6	0.52	3093.89	0.52	5061.16									1.235	10560.8	1.235	3571.82	1.235	1764.35		0.52	9603.28	0.52	3338.56	0.52	2506.5
	0.585	11677.7	0.585	3297.7	0.585	4938.18		0	10678	0	5780	0	3954		1.3	10545.3	1.3	3736.65	1.3	1798.48		0.585	9416.12	0.585	3502.12	0.585	2487.38
	0.65	12618.8	0.65	3374.52	0.65	4833.06		0.065	10886.6	0.065	5927.49	0.065	3835.06		1.365	10717.6	1.365	3909.58	1.365	1817		0.65	9293.06	0.65	3466.19	0.65	2485.69
	0.715	13705	0.715	3570.43	0.715	4714.72		0.13	11159.4	0.13	5847.91	0.13	3962.77		1.43	10405.4	1.43	4001.99	1.43	1812.43		0.715	9413.64	0.715	3416.5	0.715	2455.76
	0.78	14312.5	0.78	3634.2	0.78	4690.22		0.195	11254.5	0.195	5896.3	0.195	4024.07		1.495	10190.2	1.495	4008.59	1.495	1852.45		0.78	9561	0.78	3546	0.78	2486.67
	0.845	14190.4	0.845	3780.27	0.845	4325.76		0.26	11199.6	0.26	6011.52	0.26	4261.14		1.56	9971.34	1.56	3792.15	1.56	1984.2		0.845	9682.96	0.845	3741.51	0.845	2459.49
	0.91	14282.9	0.91	3949.3	0.91	4273.99		0.325	11373.5	0.325	6036.1	0.325	4389.76		1.625	9834.84	1.625	3740.72	1.625	2074.2		0.91	9834.64	0.91	3738.64	0.91	2436.78
	0.975	13954.9	0.975	4009.34	0.975	3839.59		0.39	11260.4	0.39	6118.67	0.39	4544.28		1.69	9523.17	1.69	3672.37	1.69	2177.02		0.975	10033	0.975	3726.25	0.975	2428
	1.04	13567.8	1.04	3994.42	1.04	3510.92		0.455	11094.3	0.455	6189.32	0.455	4675.06		1.755	9262.34	1.755	3593.32	1.755	2158.9		1.04	10491.9	1.04	3772.94	1.04	2474.33
	1.105	13204.9	1.105	3916.79	1.105	3274.9		0.52	11330.8	0.52	6377.76	0.52	4664.69		1.82	9166.14	1.82	3553.43	1.82	2142.38		1.105	10641.1	1.105	3780.5	1.105	2506.81
	1.17	12635.5	1.17	3867.69	1.17	3153.21		0.585	11596.1	0.585	6527.98	0.585	4601.69		1.885	8970.54	1.885	3419.99	1.885	2198.36		1.17	10652.5	1.17	3957.75	1.17	2478
	1.235	12773.8	1.235	3793.36	1.235	2962.19		0.65	11576.5	0.65	6505.87	0.65	4494.64		1.95	9034.04	1.95	3280.76	1.95	2123.98		1.235	10054.4	1.235	3924.79	1.235	2540.19
	1.3	13183.3	1.3	3756.93	1.3	2918		0.715	11627.7	0.715	6492.32	0.715	4344.8		2.015	8966.61	2.015	3153.38	2.015	2095.35		1.3	10093.3	1.3	3837.67	1.3	2459.89
	1.365	13780.2	1.365	3776.39	1.365	2894.77		0.78	11592.5	0.78	6548.18	0.78	4175.87		2.08	9123.43	2.08	2943.7	2.08	2126.07		1.365	10142.3	1.365	3974.33	1.365	2604.33
	1.43	14524.4	1.43	3764.57	1.43	2784.69		0.845	11503.7	0.845	6535.02	0.845	4070.64									1.43	10501.1	1.43	3920	1.43	2533.89
	1.495	14661.4	1.495	3803.4	1.495	2816.05		0.91	11610.4	0.91	6431.78	0.91	4035.09		0	9213.31	0	3046.25	0	1943.19		1.495	10696.6	1.495	3862.06	1.495	2506.57
	1.56	14479	1.56	3774.73	1.56	2833.98		0.975	11844.8	0.975	6502.95	0.975	4146.9		0.065	9001.99	0.065	3145.29	0.065	1973.85		1.56	10724.8	1.56	3919.67	1.56	2489.83
	1.625	14533.9	1.625	3727.48	1.625	2914.79		1.04	11950.2	1.04	6334.01	1.04	4039.51		0.13	8930.15	0.13	3212.6	0.13	1973.6		1.625	10808.7	1.625	3920.86	1.625	2507.1
	1.69	14649.3	1.69	3625.33	1.69	3107.45		1.105	12280.1	1.105	6388.56	1.105	4198.56		0.195	8817.74	0.195	3165.58	0.195	2150.67		1.69	10700.2	1.69	3872.53	1.69	2500.17
	1.755	14426.2	1.755	3624.61	1.755	3404.56		1.17	12423.6	1.17	6422.67	1.17	4095.32		0.26	9228.73	0.26	3235.27	0.26	2123.04		1.755	10255.5	1.755	3773.38	1.755	2604.25
	1.82	13378.9	1.82	3439	1.82	3628.18		1.235	12377.3	1.235	6294.06	1.235	4071.62		0.325	9573.3	0.325	3310.11	0.325	2099.08		1.82	10369	1.82	3661.22	1.82	2623.78
	1.885	12641.4	1.885	3341.95	1.885	3826.06		1.3	12094	1.3	6425.67	1.3	4047.19		0.39	9690.99	0.39	3501.03	0.39	2002.12		1.885	10083	1.885	3459.65	1.885	2734.15
	1.95	11397.3	1.95	3150.64	1.95	3930.51		1.365	11806	1.365	6575.64	1.365	4196.05		0.455	9673.71	0.455	3605.23	0.455	1825.6		1.95	9822.08	1.95	3263	1.95	2636.83
	2.015	10862.2	2.015	3005.3	2.015	3924.36		1.43	11689.2	1.43	6371.63	1.43	4302.16		0.52	9565	0.52	3626.53	0.52	1689.75		2.015	9565.24	2.015	3217.5	2.015	2684.53
	2.08	10580.9	2.08	2904.76	2.08	3850.86		1.495	12090.4	1.495	6335.57	1.495	4633.8		0.585	9366.05	0.585	3827.73	0.585	1602.94		2.08	9312.56	2.08	2995.17	2.08	2578.78
	2.145	10518.2	2.145	2789.09	2.145	3686.31		1.56	12635.2	1.56	6362.19	1.56	5000.93		0.65	8833.43	0.65	3837.13	0.65	1575.97		2.145	8904.75	2.145	2957.83	2.145	2516.33
	2.21	10722.4	2.21	2637.41	2.21	3492.27		1.625	12240.5	1.625	6019.06	1.625	4959.09		0.715	8770.06	0.715	3931.97	0.715	1622.15		2.21	8939.25	2.21	2784.94	2.21	2473.97
	2.275	10481.7	2.275	2556.26	2.275	3235.81		1.69	12168.8	1.69	5817.28	1.69	5016.82		0.78	8723.06	0.78	3947.41	0.78	1497.43		2.275	8868.35	2.275	2658	2.275	2428.82
	2.34	10197.9	2.34	2509.77	2.34	3038.72		1.755	12002.1	1.755	5593.61	1.755	4917.74		0.845	8830.8	0.845	3875.57	0.845	1546.66		2.34	8926	2.34	2780	2.34	2260
	2.405	9789.59	2.405	2436.15	2.405	2969.4		1.82	11718.3	1.82	5569.73	1.82	4825.57		0.91	9187.87	0.91	3969.9	0.91	1498.19
	2.47	9754.29	2.47	2468.34	2.47	2880.46		1.885	11952.7	1.885	5606.33	1.885	4827.05		0.975	9211.2	0.975	3923.47	0.975	1501.29		0	9121.5	0	2668	0	2581
	2.535	9851.74	2.535	2379.12	2.535	2888.82		1.95	12050.7	1.95	5444.74	1.95	4557.63		1.04	9520.01	1.04	4066.88	1.04	1522.94		0.065	8963.17	0.065	2726.26	0.065	2571.95
	2.6	10158.8	2.6	2409.89	2.6	2884.85		2.015	11998.4	2.015	5487.92	2.015	4519.79		1.105	9767.3	1.105	3961.45	1.105	1575.11		0.13	8551	0.13	2749.14	0.13	2481.54
	2.665	10434.2	2.665	2385.75	2.665	2915.25		2.08	12089.5	2.08	5467.62	2.08	4569.39		1.17	9754.27	1.17	4014.49	1.17	1516.3		0.195	8732.29	0.195	2797.96	0.195	2468.17
								2.145	12483.9	2.145	5420.93	2.145	4478.58		1.235	9637.24	1.235	3911.95	1.235	1565.11		0.26	8640.39	0.26	2842.99	0.26	2503.67
	0	11720.5	0	2775.5	0	3650.5		2.21	12756	2.21	5399.25	2.21	4482.25		1.3	9234.5	1.3	3913.55	1.3	1586.57		0.325	8676.56	0.325	2877.95	0.325	2632.75
	0.065	11661.2	0.065	2798.77	0.065	3632.02									1.365	8805.05	1.365	3891.04	1.365	1577.39		0.39	8682.54	0.39	2945.58	0.39	2710.71
	0.13	11709.6	0.13	2858.29	0.13	3601.4		0	10286	0	6118	0	3229		1.43	8733.62	1.43	3839.07	1.43	1633.02		0.455	8897.74	0.455	3068.71	0.455	2758.74
	0.195	11935	0.195	2832.66	0.195	3628.65		0.065	10138.3	0.065	5898.61	0.065	3245.59		1.495	8597.04	1.495	3661.72	1.495	1660.67		0.52	9529.76	0.52	3127.81	0.52	2712.76
	0.26	12138.3	0.26	2914.22	0.26	3844.89		0.13	9980.79	0.13	5800.66	0.13	3355.97		1.56	8780.39	1.56	3626.16	1.56	1688.01		0.585	10263.3	0.585	3195.81	0.585	2595.38
	0.325	12512.4	0.325	2917.46	0.325	3905.43		0.195	9775.01	0.195	6107.14	0.195	3569.49		1.625	8693.89	1.625	3599.9	1.625	1726.45		0.65	10625	0.65	3262.14	0.65	2464.43
	0.39	12464.6	0.39	2974.14	0.39	4186.46		0.26	9713.01	0.26	6281.12	0.26	3582.96		1.69	8669.63	1.69	3554.04	1.69	1832.81		0.715	10634	0.715	3288.87	0.715	2463.84
	0.455	12761.6	0.455	3012.02	0.455	4189.03		0.325	10005.6	0.325	6432.03	0.325	3853.16		1.755	8480.02	1.755	3479.93	1.755	1828.77		0.78	10477.2	0.78	3319.75	0.78	2460
	0.52	12839.2	0.52	3104.29	0.52	4084.67		0.39	10135	0.39	6615.56	0.39	3865.05		1.82	8094.64	1.82	3354.77	1.82	1763.97		0.845	10446.3	0.845	3422.82	0.845	2358.71
	0.585	13032.5	0.585	3159.03	0.585	3982.57		0.455	9998.62	0.455	6863.86	0.455	3945.29		1.885	8045.58	1.885	3405.02	1.885	1705.02		0.91	11294.5	0.91	3518.47	0.91	2304.77
	0.65	13092.6	0.65	3228.15	0.65	3889.24		0.52	10243.4	0.52	7303.19	0.52	3836.78		1.95	8096.84	1.95	3367.54	1.95	1602.1		0.975	11960	0.975	3537.29	0.975	2368.77
	0.715	13410.4	0.715	3340.86	0.715	3900.6		0.585	10338	0.585	7700.24	0.585	3594.04		2.015	7968.68	2.015	3311.25	2.015	1537.21		1.04	12436.6	1.04	3578.56	1.04	2299.68
	0.78	13886.5	0.78	3489.26	0.78	3943.89		0.65	10562.2	0.65	7977.12	0.65	3352.22		2.08	7939.04	2.08	3265.08	2.08	1573.78		1.105	12156.7	1.105	3517.61	1.105	2219.19
	0.845	14506	0.845	3582	0.845	3728.85		0.715	10877.6	0.715	8054.41	0.715	3204.86		2.145	8046.92	2.145	3240.47	2.145	1555.54		1.17	11615.9	1.17	3437.12	1.17	2227.25
	0.91	14896.3	0.91	3698.45	0.91	3676.79		0.78	11120.6	0.78	8015.12	0.78	2981.59									1.235	11259.9	1.235	3434.63	1.235	2172.38
	0.975	15088	0.975	3758.21	0.975	3479.21		0.845	11343	0.845	8077.49	0.845	2983.94		0	10096	0	3338.67	0	2059.33		1.3	10997.3	1.3	3427.55	1.3	2195.36
	1.04	15355.3	1.04	3765.8	1.04	3378.3		0.91	11523.9	0.91	7936.22	0.91	3118.44		0.065	10201.5	0.065	3445.55	0.065	2121.64		1.365	10773.6	1.365	3484.21	1.365	2223.17
	1.105	15426.8	1.105	3838.41	1.105	3349.48		0.975	11495.6	0.975	8052.13	0.975	3085.91		0.13	10209.4	0.13	3501.65	0.13	2158.34		1.43	10399.8	1.43	3562.14	1.43	2265.76
	1.17	15370.2	1.17	3832.8	1.17	3332.37		1.04	11223.6	1.04	8210.5	1.04	3127.38		0.195	10206.8	0.195	3430.47	0.195	2153.93		1.495	10062.3	1.495	3644.54	1.495	2270.69
	1.235	15450.2	1.235	3865.88	1.235	3314.25		1.105	11170.8	1.105	8198.48	1.105	3169.74		0.26	10131.5	0.26	3489.93	0.26	2312.2		1.56	9552	1.56	3688.33	1.56	2229.83
	1.3	15408.3	1.3	3935.89	1.3	3226.68		1.17	11339.2	1.17	8017.93	1.17	3273.61		0.325	9976.53	0.325	3719.21	0.325	2449.01		1.625	9190.81	1.625	3588.55	1.625	2297.89
	1.365	15105.4	1.365	3936.44	1.365	3236.03		1.235	11071.2	1.235	8119.44	1.235	3296.8		0.39	10073.7	0.39	3858.78	0.39	2486.85		1.69	8759.67	1.69	3412.78	1.69	2354.29
	1.43	14940.7	1.43	3962.12	1.43	3282		1.3	10883.5	1.3	8168.89	1.3	3347.83		0.455	10410.3	0.455	3871.25	0.455	2483.46		1.755	8842.25	1.755	3310.25	1.755	2417.94
	1.495	14964.6	1.495	3788.38	1.495	3270.15		1.365	10535.8	1.365	8176	1.365	3266.19		0.52	10544.5	0.52	4008.84	0.52	2463.3		1.82	8572.32	1.82	3198.36	1.82	2545.01
	1.56	15010.7	1.56	3875.65	1.56	3260.92		1.43	10271.9	1.43	7899.17	1.43	3262.07		0.585	10754.6	0.585	4055.7	0.585	2275.99		1.885	8494.21	1.885	2942.86	1.885	2632.68
	1.625	15314	1.625	3910.56	1.625	3398.05		1.495	10421.4	1.495	7519.81	1.495	3347.37		0.65	10744.4	0.65	4141.33	0.65	2133.47		1.95	8747.67	1.95	2911.33	1.95	2569.54
	1.69	16327.1	1.69	3902.57	1.69	3557.74		1.56	10793.9	1.56	7256.81	1.56	3480.75		0.715	10656.4	0.715	4231.4	0.715	2113.99		2.015	8584.17	2.015	2850.42	2.015	2509.72
	1.755	17137.9	1.755	3933.57	1.755	3814.06		1.625	10803.6	1.625	6916.16	1.625	3570.82		0.78	10665.1	0.78	4356.88	0.78	2131.54		2.08	8299.96	2.08	2612.15	2.08	2504.61
	1.82	16912.2	1.82	3868.74	1.82	3944.64		1.69	10907.2	1.69	6485.65	1.69	3747.03		0.845	10895.5	0.845	4423.5	0.845	2113.69		2.145	8172.83	2.145	2478.06	2.145	2381.73
	1.885	16330.2	1.885	3846.96	1.885	4089.37		1.755	10893.8	1.755	6097.7	1.755	3715.51		0.91	10911.2	0.91	4334.53	0.91	2129.22		2.21	8109.5	2.21	2475.69	2.21	2253.72
	1.95	15395.4	1.95	3787.63	1.95	3986.96		1.82	11145.2	1.82	5875.9	1.82	3812.1		0.975	11043.8	0.975	4339.38	0.975	2142.46		2.275	8194.19	2.275	2478.38	2.275	2268.27
	2.015	14933.6	2.015	3666	2.015	3816.69		1.885	11595.7	1.885	5818.32	1.885	3759.27		1.04	10881.7	1.04	4272.59	1.04	2071.62		2.34	8106	2.34	2475	2.34	2266
	2.08	14542.6	2.08	3604.86	2.08	3766.01		1.95	11757.6	1.95	5674.36	1.95	3551.05		1.105	10791.5	1.105	4196.9	1.105	2161.88		HeLa_tetCENPBmCRMI1_STB-MG132_+Dox_AZD1152_BLM-RFP-BubR1-14.czi
	2.145	14141.6	2.145	3384.33	2.145	3793.05		2.015	11630.5	2.015	5653.85	2.015	3440.52		1.17	10565.7	1.17	4133.95	1.17	2047.67
	2.21	13822.4	2.21	3273.96	2.21	3852.09		2.08	11487.5	2.08	5494	2.08	3375.5		1.235	10358.2	1.235	4157.6	1.235	2046.5		0	11332.5	0	3288.67	0	3735
	2.275	13640.8	2.275	3208.44	2.275	3762.6		HeLa_tetCENPBmCRMI1_STB-MG132_+Dox_BLM-RFP-BubR1-23.czi							1.3	10512.8	1.3	3953.37	1.3	2107.35		0.065	11320.4	0.065	3281.4	0.065	3583.59
	2.34	13487.3	2.34	3160.44	2.34	3588.45									1.365	10719.7	1.365	3830.48	1.365	2051.91		0.13	11279.4	0.13	3284.19	0.13	3668.28
	2.405	13976.3	2.405	3209.09	2.405	3682.64		0	9007	0	3428	0	2856		1.43	11245.7	1.43	4000.25	1.43	2104.64		0.195	11225.6	0.195	3378.69	0.195	3706.36
	2.47	14174	2.47	3235	2.47	3700		0.065	8989	0.065	3483.94	0.065	2868.62		1.495	11295.6	1.495	3930.93	1.495	2024.44		0.26	11081.2	0.26	3463.92	0.26	3816.55
								0.13	8850.62	0.13	3563.12	0.13	3076.88		1.56	11358.5	1.56	3954.77	1.56	2014.71		0.325	11115.1	0.325	3608.37	0.325	3957.81
	0	10811	0	2593	0	3178.5		0.195	8939.06	0.195	3535.12	0.195	2982.38		1.625	10880.7	1.625	3836.59	1.625	2009.52		0.39	11131.5	0.39	3640.36	0.39	3966.18
	0.065	10890.7	0.065	2592.25	0.065	3225.5		0.26	8880.5	0.26	3604.5	0.26	3052.5		1.69	10739.2	1.69	3888.39	1.69	2004.55		0.455	11389.8	0.455	3747.48	0.455	3925.49
	0.13	10807.4	0.13	2557.32	0.13	3230.49		0.325	8851.94	0.325	3853.06	0.325	3332.81		1.755	10633.2	1.755	3799.51	1.755	1971.91		0.52	11689.3	0.52	3871.24	0.52	3896.67
	0.195	10906	0.195	2598.26	0.195	3227.45		0.39	8841.62	0.39	3918.38	0.39	3229		1.82	10574.4	1.82	3777.85	1.82	2034.07		0.585	11604.3	0.585	3924.18	0.585	3818.63
	0.26	10776.7	0.26	2571.32	0.26	3062.04		0.455	8553.19	0.455	4126.19	0.455	3264.06		1.885	10548	1.885	3820.03	1.885	2052.8		0.65	11654	0.65	3972.1	0.65	3603.33
	0.325	10693.7	0.325	2608.12	0.325	3058.83		0.52	8487.5	0.52	4412	0.52	3072		1.95	10287.2	1.95	3714.06	1.95	2236.09		0.715	11787.6	0.715	3963.27	0.715	3458.1
	0.39	10838.2	0.39	2637.85	0.39	3104.94		0.585	8600.75	0.585	4434.06	0.585	2843.44		2.015	10350	2.015	3498.2	2.015	2328.07		0.78	11315.4	0.78	3949.55	0.78	3388.05
	0.455	10895.1	0.455	2680.78	0.455	3086.45		0.65	9033.25	0.65	4650	0.65	2891.88		2.08	10298.8	2.08	3450.19	2.08	2368.34		0.845	11322.8	0.845	3898.34	0.845	3381.69
	0.52	11121.2	0.52	2665.16	0.52	3259.2		0.715	8882.5	0.715	4702.56	0.715	2723.88		2.145	10205.2	2.145	3411.79	2.145	2411.43		0.91	11325.3	0.91	3893.47	0.91	3296.95
	0.585	11175.4	0.585	2735.9	0.585	3297.84		0.78	8516	0.78	4503	0.78	2614.75		2.21	10299.7	2.21	3265.83	2.21	2275.82		0.975	11749.4	0.975	3918.01	0.975	3394.02
	0.65	11281.9	0.65	2799.41	0.65	3370.72		0.845	8264.19	0.845	4507.56	0.845	2573.81		2.275	10181.1	2.275	3294.83	2.275	2167.02		1.04	11930.4	1.04	3907.67	1.04	3298.19
	0.715	11620.3	0.715	2920.26	0.715	3333.56		0.91	8565.88	0.91	4474.5	0.91	2622.88		2.34	10166.3	2.34	3164.42	2.34	2137.03		1.105	12172.4	1.105	3891.83	1.105	3309.04
	0.78	12185.8	0.78	3047.91	0.78	3212.69		0.975	9376	0.975	4492.25	0.975	2588.75									1.17	12316.9	1.17	3911.67	1.17	3336.96
	0.845	12930.2	0.845	3047.41	0.845	2998.03		1.04	9190	1.04	4312	1.04	2592		0	9713.33	0	3174	0	2075.33		1.235	12363.6	1.235	3870.45	1.235	3459.13
	0.91	13692.4	0.91	3227.8	0.91	2780.32		1.105	9220.12	1.105	4269.38	1.105	2693.31		0.065	9719.41	0.065	3067.41	0.065	2172.49		1.3	11682.1	1.3	3934.7	1.3	3685.32
	0.975	14617.5	0.975	3339.23	0.975	2667.37		1.17	8964.5	1.17	4427.12	1.17	2739.12		0.13	9706.35	0.13	3148.46	0.13	2209.89		1.365	11538.1	1.365	3723.32	1.365	3892.7
	1.04	14831.8	1.04	3207.98	1.04	2665.34		1.235	8556.94	1.235	4305	1.235	2778.31		0.195	9791.71	0.195	3229.58	0.195	2239.59		1.43	11336.2	1.43	3571.54	1.43	3977.79
	1.105	14714.1	1.105	3248.58	1.105	2643.55		1.3	8438	1.3	4202	1.3	2872.75		0.26	9808.99	0.26	3217.38	0.26	2312.25		1.495	11098.3	1.495	3446.94	1.495	3940.68
	1.17	14038.5	1.17	3122.89	1.17	2651.3		1.365	8164.75	1.365	4158.25	1.365	2833.25		0.325	9721.79	0.325	3415.48	0.325	2303.23		1.56	10820.4	1.56	3327.88	1.56	3733.49
	1.235	13778.4	1.235	3029.05	1.235	2586.08		1.43	7989.75	1.43	4274.12	1.43	2922.38		0.39	9861.45	0.39	3518.57	0.39	2226.68		1.625	10724.1	1.625	3273.92	1.625	3492.73
	1.3	13832.2	1.3	2955.75	1.3	2572.25		1.495	7759.06	1.495	4042.5	1.495	3067.31		0.455	10221	0.455	3541.58	0.455	2218.7		1.69	10966.6	1.69	3258.19	1.69	3324.17
	1.365	14024.3	1.365	2914.87	1.365	2562.41		1.56	7628.5	1.56	3850.5	1.56	3081.5		0.52	10330.6	0.52	3595.63	0.52	2063.25		1.755	10995.4	1.755	3236.42	1.755	3138.36
	1.43	13816	1.43	2868.15	1.43	2659.7		1.625	7573.31	1.625	3751.69	1.625	3144.62		0.585	10403.2	0.585	3642.6	0.585	2046.81		1.82	10873.5	1.82	3204.37	1.82	3187.5
	1.495	13390.2	1.495	2898.99	1.495	2722.57		1.69	7301.25	1.69	3437.5	1.69	3148		0.65	10447.5	0.65	3761.82	0.65	2020.51		1.885	10673.8	1.885	3128.42	1.885	3067.42
	1.56	13059.6	1.56	2958.16	1.56	2771.64		1.755	7074.19	1.755	3543.81	1.755	3325.69		0.715	10617	0.715	3858.09	0.715	1929.35
	1.625	12821.6	1.625	3013.19	1.625	2950.66		1.82	7082	1.82	3338.25	1.82	3142.25		0.78	10819.1	0.78	3921.76	0.78	1935.84		0	11468	0	4448.25	0	3452.75
	1.69	12950.8	1.69	2988.46	1.69	2967.04		1.885	7051.31	1.885	3199.44	1.885	2994.44		0.845	11188.5	0.845	4019.2	0.845	2009.64		0.065	11553.2	0.065	4568.06	0.065	3567.62
	1.755	13648.9	1.755	3153.47	1.755	3048.03		1.95	7057.88	1.95	3107.12	1.95	2813		0.91	11375.9	0.91	3938.81	0.91	2090.79		0.13	11855.9	0.13	4729.13	0.13	3732.01
	1.82	14895.6	1.82	3184.45	1.82	3234.44		2.015	7138.88	2.015	3071.5	2.015	2729.38		0.975	11727.8	0.975	4193.35	0.975	2080.4		0.195	11828.2	0.195	4827.35	0.195	3898
	1.885	16353.9	1.885	3410.34	1.885	3384.68		2.08	7303	2.08	3122	2.08	2481		1.04	11891.4	1.04	4140.01	1.04	2039.04		0.26	11697.4	0.26	4724.4	0.26	4129.37
	1.95	16996.3	1.95	3415.03	1.95	3298.03									1.105	12062.8	1.105	4217.28	1.105	2047.05		0.325	11719.6	0.325	4617.81	0.325	4287.09
	2.015	16531.6	2.015	3415.76	2.015	3265.33		0	8567	0	3368	0	3111		1.17	12143.9	1.17	4316.18	1.17	2025.59		0.39	11553.6	0.39	4469.55	0.39	4329.96
	2.08	15036	2.08	3364.28	2.08	3160.9		0.065	8511.52	0.065	3571.35	0.065	3104.36		1.235	11849.5	1.235	4406.26	1.235	2001.77		0.455	11438.4	0.455	4330.54	0.455	4240.39
	2.145	13367.7	2.145	3220.89	2.145	3069.39		0.13	8545.09	0.13	3663.89	0.13	3117.87		1.3	11669.9	1.3	4478.67	1.3	1970.6		0.52	11343.6	0.52	4240.46	0.52	4206.33
	2.21	12321	2.21	3114.93	2.21	2906		0.195	8351.96	0.195	3581.5	0.195	3111.01		1.365	11535.5	1.365	4421.14	1.365	1978.37		0.585	11459.1	0.585	4283.43	0.585	4076.52
	2.275	11703	2.275	3076.52	2.275	2739.95		0.26	8308.64	0.26	3675.27	0.26	2984.44		1.43	11609.6	1.43	4343.74	1.43	1977.98		0.65	11386	0.65	4287.91	0.65	3759.78
	2.34	11741.5	2.34	3062.51	2.34	2675.28		0.325	8680.66	0.325	3910.17	0.325	3111.08		1.495	11510.2	1.495	4269.77	1.495	2015.82		0.715	11316.5	0.715	4266.86	0.715	3591.2
	2.405	11758.7	2.405	3013.39	2.405	2583.03		0.39	8740.88	0.39	3952.47	0.39	3281.45		1.56	11545	1.56	4308.71	1.56	1996.59		0.78	11607.2	0.78	4335	0.78	3555.54
	2.47	11773.8	2.47	2950.92	2.47	2551.11		0.455	8786	0.455	3974.33	0.455	3410.68		1.625	11741.3	1.625	4204.9	1.625	2030.11		0.845	11871.4	0.845	4366.74	0.845	3555.03
	2.535	11462.4	2.535	3003.49	2.535	2549.82		0.52	8894.89	0.52	4214.35	0.52	3467.77		1.69	12029	1.69	4032.65	1.69	2101.82		0.91	12021	0.91	4384.5	0.91	3508.95
	2.6	11364	2.6	3029	2.6	2629		0.585	9219.81	0.585	4264.15	0.585	3433.95		1.755	12160.5	1.755	3969.91	1.755	2215.31		0.975	11978.7	0.975	4354.12	0.975	3575.92
								0.65	9567.21	0.65	4421.89	0.65	3422.58		1.82	12228	1.82	3887.42	1.82	2362.7		1.04	11927.2	1.04	4481.54	1.04	3542.03
	0	13167	0	3358	0	3358		0.715	9681.35	0.715	4541.45	0.715	3278.39		1.885	12219.8	1.885	3827.91	1.885	2307.01		1.105	11918.1	1.105	4451.79	1.105	3509.24
	0.065	13640.6	0.065	3380.77	0.065	3485.23		0.78	9705.08	0.78	4552.47	0.78	3222.49		1.95	12348.5	1.95	3718.13	1.95	2257.64		1.17	11873.6	1.17	4368.62	1.17	3487.86
	0.13	13807.5	0.13	3297.42	0.13	3515.93		0.845	9614.96	0.845	4572.79	0.845	3136.85		2.015	12325.5	2.015	3643.03	2.015	2269.87		1.235	11773.2	1.235	4391.07	1.235	3421.54
	0.195	14469.8	0.195	3408.21	0.195	3592.76		0.91	9505.39	0.91	4623.6	0.91	2957.76		2.08	12211	2.08	3730.88	2.08	2175.31		1.3	11690.4	1.3	4335.97	1.3	3444.36
	0.26	14757.1	0.26	3486.95	0.26	3739.37		0.975	9480	0.975	4603.69	0.975	2941.43		2.145	12210.1	2.145	4057.59	2.145	2098.74		1.365	11835.4	1.365	4337.72	1.365	3440.89
	0.325	15617.8	0.325	3612.97	0.325	4043.36		1.04	9610.16	1.04	4659.84	1.04	2892.5									1.43	11773.3	1.43	4373.58	1.43	3596.32
	0.39	16001.7	0.39	3770.49	0.39	4265.48		1.105	9496.54	1.105	4444.77	1.105	2703.37		0	8785.12	0	2919.75	0	1750.62		1.495	11673.6	1.495	4453.42	1.495	3623.49
	0.455	16379.6	0.455	3793.12	0.455	4271.88		1.17	9316.03	1.17	4673.92	1.17	2788.69		0.065	8890.77	0.065	2914.91	0.065	1783.03		1.56	11640.7	1.56	4543.32	1.56	3708.59
	0.52	16548.2	0.52	4093.82	0.52	4112.45		1.235	9226.99	1.235	4496.38	1.235	2862.13		0.13	8903.64	0.13	2971.21	0.13	1788.36		1.625	11553.5	1.625	4515.1	1.625	3808.45
	0.585	16889.2	0.585	4366.57	0.585	3865.22		1.3	8861.23	1.3	4442.96	1.3	2978.77		0.195	8853.13	0.195	2996.12	0.195	1742.42		1.69	11348.9	1.69	4340.6	1.69	3887.46
	0.65	17421.5	0.65	4409.7	0.65	3726.43		1.365	9193.21	1.365	4344.47	1.365	2984.65		0.26	8810.87	0.26	2898.5	0.26	1835.89		1.755	11440.6	1.755	4168.34	1.755	4115.28
	0.715	17649.5	0.715	4541.67	0.715	3478		1.43	9432.26	1.43	4440.81	1.43	3109.39		0.325	8617.97	0.325	3075.2	0.325	1807.39		1.82	11249.1	1.82	3960.26	1.82	4120.17
	0.78	17627.7	0.78	4434.72	0.78	3477.86		1.495	9585.26	1.495	4292.53	1.495	3143.54		0.39	8536.76	0.39	3164.68	0.39	1864.82		1.885	11260.8	1.885	3742.87	1.885	4173.91
	0.845	17421.8	0.845	4491.8	0.845	3428.82		1.56	9504.41	1.56	3989.88	1.56	3214.03		0.455	8504.78	0.455	3320.55	0.455	1897.46		1.95	11126.4	1.95	3687.28	1.95	3964.52
	0.91	17180.2	0.91	4468.61	0.91	3544.5		1.625	9307.52	1.625	3967.15	1.625	3271.69		0.52	8514.33	0.52	3505.39	0.52	1837.26		2.015	11177.2	2.015	3528.76	2.015	3779.66
	0.975	17993.5	0.975	4393.87	0.975	3520.83		1.69	9240.58	1.69	3866.17	1.69	3475.86		0.585	8404	0.585	3660.88	0.585	1655.08		2.08	11273.9	2.08	3352.45	2.08	3680.74
	1.04	18386.2	1.04	4393.42	1.04	3354.02		1.755	9188.02	1.755	3729.39	1.755	3623.54		0.65	8411.6	0.65	3827.15	0.65	1536.89		2.145	11453.7	2.145	3386.32	2.145	3759.8
	1.105	18228.8	1.105	4511.9	1.105	3329.57		1.82	9256.03	1.82	3546.04	1.82	3735.34		0.715	8428.2	0.715	3893.47	0.715	1517.31		2.21	11057.2	2.21	3231.4	2.21	3709.04
	1.17	17548.1	1.17	4471.89	1.17	3471.64		1.885	9286.36	1.885	3366.14	1.885	3778.59		0.78	8613.48	0.78	4059.38	0.78	1523.15		2.275	11030.5	2.275	3201.69	2.275	3697.31
	1.235	17240.2	1.235	4406.57	1.235	3406.62		1.95	9183.28	1.95	3285.6	1.95	3670.85		0.845	8869.74	0.845	4025.09	0.845	1537.46
	1.3	17048.2	1.3	4469.01	1.3	3468.36		2.015	9247.21	2.015	3191.45	2.015	3646.53		0.91	9176.35	0.91	4104.79	0.91	1534.08		0	12352	0	3686	0	4332
	1.365	16385.4	1.365	4471.96	1.365	3390.99		2.08	9428.63	2.08	3029.12	2.08	3613.74		0.975	9718.53	0.975	4233.76	0.975	1530.2		0.065	11948.1	0.065	3709.19	0.065	4158.96
	1.43	15456.3	1.43	4423	1.43	3297.33		2.145	9512.79	2.145	3000.09	2.145	3438.37		1.04	9759.32	1.04	4262.33	1.04	1489.6		0.13	11739.5	0.13	3775.24	0.13	4184.52
	1.495	15082.8	1.495	4197.45	1.495	3300.03		2.21	9521.15	2.21	2847.27	2.21	3466.97		1.105	9995.75	1.105	4311.87	1.105	1553.23		0.195	11642	0.195	3922.63	0.195	4208.52
	1.56	14881.2	1.56	4011.39	1.56	3472.99		2.275	9458	2.275	2937.34	2.275	3329.44		1.17	10292.3	1.17	4177.2	1.17	1482.52		0.26	11792.6	0.26	4132.48	0.26	4259.75
	1.625	14380.1	1.625	3796.3	1.625	3657.93		2.34	9712.54	2.34	2974.84	2.34	3207.7		1.235	10897.6	1.235	4173.92	1.235	1509.44		0.325	12178.6	0.325	4313.46	0.325	4378.17
	1.69	13636	1.69	3613.56	1.69	3891.15		2.405	9608	2.405	2801	2.405	3410		1.3	11686.8	1.3	4260.19	1.3	1484.71		0.39	12339.6	0.39	4540.51	0.39	4357.57
	1.755	13013.4	1.755	3393.75	1.755	4161.19									1.365	12165.6	1.365	4466.58	1.365	1440.94		0.455	12717.6	0.455	4656.58	0.455	4220.84
	1.82	12510.3	1.82	3170.04	1.82	4122.38		0	6842	0	3306	0	2449		1.43	12569.8	1.43	4418.5	1.43	1469.07		0.52	13296	0.52	4886.73	0.52	3996.86
	1.885	12249.3	1.885	3135.5	1.885	3820.28		0.065	7033.24	0.065	3337.11	0.065	2570.96		1.495	12509.8	1.495	4576.67	1.495	1499.08		0.585	13509	0.585	4734.14	0.585	3878.39
	1.95	11866.2	1.95	3105.45	1.95	3552.74		0.13	7302.95	0.13	3446.25	0.13	2572.58		1.56	12046	1.56	4682.44	1.56	1500.14		0.65	14105.7	0.65	4700.06	0.65	3754.43
	2.015	11813.5	2.015	3030.42	2.015	3367.42		0.195	7235.35	0.195	3466.02	0.195	2786.59		1.625	11581.2	1.625	4717.69	1.625	1485.22		0.715	14340.3	0.715	4564.26	0.715	3770.56
	2.08	12065.9	2.08	2943.93	2.08	3326.3		0.26	7369.39	0.26	3593.14	0.26	3072.09		1.69	11368.9	1.69	4547.13	1.69	1563.34		0.78	14273.4	0.78	4532.38	0.78	3827.93
	2.145	12264.5	2.145	2922.5	2.145	3307		0.325	7424.43	0.325	3851.12	0.325	3313.86		1.755	11086.7	1.755	4542.88	1.755	1635.34		0.845	14126.4	0.845	4601.73	0.845	3909.43
								0.39	7391.7	0.39	3684.55	0.39	3458.58		1.82	10948.7	1.82	4418.5	1.82	1791.2		0.91	13941.6	0.91	4641.84	0.91	4037.72
	0	11154.5	0	2645.5	0	2975		0.455	7510.04	0.455	3904.84	0.455	3442.28		1.885	10607.7	1.885	4244.28	1.885	1784.04		0.975	13683.9	0.975	4546.38	0.975	4192.31
	0.065	11238.3	0.065	2697.14	0.065	3052.43		0.52	7774.82	0.52	3942.14	0.52	3518.28		1.95	10249.8	1.95	3974.7	1.95	1832.09		1.04	13676.7	1.04	4340.82	1.04	4373.39
	0.13	11152.4	0.13	2716.24	0.13	3273.14		0.585	7757.39	0.585	4110.17	0.585	3400.57		2.015	9906.28	2.015	3777.34	2.015	1932.17		1.105	13980.2	1.105	4442.36	1.105	4227.51
	0.195	11286.5	0.195	2750.33	0.195	3498.22		0.65	8121.2	0.65	4267.75	0.65	3208.86		2.08	9511.44	2.08	3622.75	2.08	1965.09		1.17	13684.7	1.17	4402.5	1.17	4415.03
	0.26	11307.7	0.26	2897.36	0.26	3688.72		0.715	8706.55	0.715	4311.07	0.715	3091.86		2.145	9332.64	2.145	3533.95	2.145	1883.88		1.235	13178.6	1.235	4235.2	1.235	4493.64
	0.325	11544.7	0.325	2873.81	0.325	3679.01		0.78	8923.54	0.78	4292.09	0.78	2966.59		2.21	9004.56	2.21	3331.45	2.21	1683.45		1.3	12759	1.3	4126.76	1.3	4497.09
	0.39	11665.7	0.39	2982.83	0.39	3626		0.845	8941.23	0.845	4328.2	0.845	2951.49		2.275	8834.84	2.275	3284.65	2.275	1630.95		1.365	12294	1.365	3994.34	1.365	4576.31
	0.455	12329	0.455	3042.8	0.455	3663.86		0.91	9106.36	0.91	4268.76	0.91	2867.04		2.34	8790.79	2.34	3144.2	2.34	1594.01		1.43	12334.4	1.43	3832.78	1.43	4499.53
	0.52	12744.3	0.52	3154.37	0.52	3421.1		0.975	9382.59	0.975	4410.43	0.975	2769.51									1.495	11939.1	1.495	3688.25	1.495	4382.43
	0.585	13206.5	0.585	3233	0.585	3216		1.04	9393.13	1.04	4576.22	1.04	2804.29		0	11791.1	0	3401.89	0	2597.11		1.56	11609.8	1.56	3581.36	1.56	4324.14
	0.65	13542.7	0.65	3262.4	0.65	3145.18		1.105	9308.43	1.105	4556.46	1.105	2905.68		0.065	11637.8	0.065	3477.45	0.065	2668.66		1.625	11547.7	1.625	3651.88	1.625	4175.69
	0.715	13540	0.715	3275.57	0.715	3039.26		1.17	9102	1.17	4540.06	1.17	2892.43		0.13	11413.2	0.13	3584.85	0.13	2735.04		1.69	11989.9	1.69	3594.09	1.69	4014.33
	0.78	13224.6	0.78	3263.72	0.78	2988.78		1.235	8737.46	1.235	4602.45	1.235	2772.34		0.195	11615.4	0.195	3811.47	0.195	2750.98		1.755	11939.9	1.755	3610.76	1.755	3995.46
	0.845	13285.8	0.845	3371.05	0.845	2997.18		1.3	8701.02	1.3	4572.35	1.3	2798.43		0.26	11691	0.26	4046	0.26	2668.51		1.82	11881.5	1.82	3572.11	1.82	3984.14
	0.91	13356.8	0.91	3247.68	0.91	2852.65		1.365	8989.68	1.365	4574.04	1.365	2875.32		0.325	11838.2	0.325	4313.32	0.325	2677.53		1.885	11669.4	1.885	3587.79	1.885	3957.4
	0.975	13305.1	0.975	3268.89	0.975	2975.39		1.43	9283.4	1.43	4561.54	1.43	2936.8		0.39	11736.2	0.39	4523.08	0.39	2597.79		1.95	11579.3	1.95	3464.06	1.95	3845.64
	1.04	13085.2	1.04	3225.15	1.04	3090.44		1.495	9349.07	1.495	4417.39	1.495	2999.74		0.455	11697.6	0.455	4641.12	0.455	2486.35		2.015	11456.8	2.015	3500	2.015	3839.75
	1.105	12898	1.105	3221.25	1.105	3110.06		1.56	9231.67	1.56	4218.17	1.56	3101.86		0.52	11768.7	0.52	4756.79	0.52	2437.66
	1.17	12722.5	1.17	3116.5	1.17	3117		1.625	9144.22	1.625	4012	1.625	3191.74		0.585	11619.2	0.585	4890.04	0.585	2412.1		0	11332.5	0	3505	0	3322.5
	1.235	12549.8	1.235	3134.59	1.235	3018.26		1.69	8983.36	1.69	3895.09	1.69	3281.79		0.65	11791.8	0.65	4795.34	0.65	2390.73		0.065	11247.6	0.065	3415.27	0.065	3343.73
	1.3	12830.2	1.3	3181.23	1.3	2979.74		1.755	8808.29	1.755	3707.52	1.755	3415.83		0.715	11930.9	0.715	4843.56	0.715	2320.23		0.13	11721.4	0.13	3567.92	0.13	3669.94
	1.365	13259.1	1.365	3252.11	1.365	3005.83		1.82	8670.64	1.82	3539.24	1.82	3288		0.78	11691.4	0.78	4785.91	0.78	2257.43		0.195	11679.4	0.195	3581.69	0.195	3811.94
	1.43	13958.4	1.43	3362.9	1.43	3144.92		1.885	8305.22	1.885	3524.49	1.885	3198.17		0.845	11313.5	0.845	4703.79	0.845	2179.42		0.26	11951.6	0.26	3659.7	0.26	3855.24
	1.495	14593.3	1.495	3399.97	1.495	3154.65		1.95	8664.57	1.95	3360.47	1.95	2995.45		0.91	10974.5	0.91	4610.14	0.91	2190.77		0.325	12070.6	0.325	3875.81	0.325	4237.88
	1.56	14540.6	1.56	3394.72	1.56	3104.72		2.015	8723.33	2.015	3337.13	2.015	3042.72		0.975	10724.9	0.975	4591.72	0.975	2099.91		0.39	12365.6	0.39	4096.07	0.39	4388.09
	1.625	14288.8	1.625	3420.83	1.625	3252.22		2.08	9027.33	2.08	3205.51	2.08	3032.37		1.04	10675.4	1.04	4608.13	1.04	2064.38		0.455	12662.8	0.455	4321.69	0.455	4507.55
	1.69	13454	1.69	3476.93	1.69	3438.86		2.145	9026.71	2.145	3311.16	2.145	3074.21		1.105	10576.7	1.105	4653.18	1.105	2018.53		0.52	12918.8	0.52	4265.44	0.52	4548
	1.755	12876.5	1.755	3390.5	1.755	3518		2.21	9177.59	2.21	3143.65	2.21	2971.57		1.17	10800.7	1.17	4754.12	1.17	2039.9		0.585	13055.1	0.585	4449.12	0.585	4493.41
	1.82	12420.4	1.82	3229.33	1.82	3624.88		2.275	9606	2.275	2999	2.275	3036		1.235	11015	1.235	4990.27	1.235	2026.98		0.65	13082.3	0.65	4614.56	0.65	4444.98
	1.885	11938.7	1.885	3075.69	1.885	3696.72									1.3	11418.4	1.3	5175.72	1.3	1951.65		0.715	12960.5	0.715	4678.17	0.715	4201.17
	1.95	11722.6	1.95	2988.33	1.95	3606.89		0	8312	0	3442	0	2965		1.365	11698.4	1.365	5341.22	1.365	1961.79		0.78	13051.7	0.78	4730.69	0.78	3968.65
	2.015	11747.6	2.015	2977.21	2.015	3565.23		0.065	8510.32	0.065	3441.13	0.065	3067.15		1.43	12126.1	1.43	5464.7	1.43	1936.04		0.845	12915.9	0.845	4874.8	0.845	3867
	2.08	11571.9	2.08	2898.99	2.08	3573.49		0.13	8574.58	0.13	3506.49	0.13	2986.08		1.495	12061.9	1.495	5713.26	1.495	1924.12		0.91	13048.8	0.91	4872.32	0.91	3868.13
	2.145	11387.4	2.145	2942.94	2.145	3448.39		0.195	8446.38	0.195	3629.03	0.195	3013.24		1.56	11989.8	1.56	5853.39	1.56	1905.55		0.975	13297.5	0.975	4993.71	0.975	3852.87
	2.21	11377.6	2.21	2879.91	2.21	3212.26		0.26	8536.4	0.26	3620.65	0.26	3104.48		1.625	11920.2	1.625	5910.57	1.625	1873.61		1.04	13722.4	1.04	4910.52	1.04	3913.22
	2.275	11446.5	2.275	2917.72	2.275	3213.41		0.325	8569.57	0.325	3805.31	0.325	3263.9		1.69	11382	1.69	5850.37	1.69	1926.65		1.105	13794	1.105	4921.57	1.105	3821.46
	2.34	11473.5	2.34	2945	2.34	3256.5		0.39	8610.63	0.39	3975.89	0.39	3304.84		1.755	11200.8	1.755	5723.31	1.755	1985.39		1.17	13483.4	1.17	4763.65	1.17	3843.56
								0.455	8691.6	0.455	4033.4	0.455	3491		1.82	11060.9	1.82	5746.44	1.82	2063.23		1.235	12907.6	1.235	4779.1	1.235	3877.44
	0	11634	0	2736.5	0	3799.5		0.52	8748.67	0.52	4088.71	0.52	3471.93		1.885	11252.4	1.885	5663.55	1.885	2320.19		1.3	12476.9	1.3	4703.26	1.3	3886.07
	0.065	11768.6	0.065	2773.41	0.065	3823.88		0.585	9092.45	0.585	4298.81	0.585	3538.47		1.95	11848.1	1.95	5524.62	1.95	2421.07		1.365	12205.6	1.365	4524.1	1.365	3997.05
	0.13	11802.7	0.13	2817.19	0.13	3919.5		0.65	9416.51	0.65	4381.49	0.65	3419.12		2.015	12644.7	2.015	5379.45	2.015	2549.29		1.43	11943.7	1.43	4378	1.43	4067.17
	0.195	11880	0.195	2850.52	0.195	3843.16		0.715	9409.43	0.715	4432.04	0.715	3286.53		2.08	13260.7	2.08	5170.79	2.08	2622.9		1.495	11635.4	1.495	4157.28	1.495	4166.54
	0.26	12065.7	0.26	2861.43	0.26	3946.71		0.78	9269.13	0.78	4469.56	0.78	3141.98		2.145	13471.5	2.145	5182.3	2.145	2670.6		1.56	11722.7	1.56	4037.67	1.56	4226.89
	0.325	12266.9	0.325	2900.96	0.325	4095.37		0.845	9181.43	0.845	4556.14	0.845	3068.09		2.21	12773.5	2.21	5038.36	2.21	2504.89		1.625	11971.1	1.625	3887.94	1.625	4339.26
	0.39	12651.9	0.39	3100.25	0.39	4149.71		0.91	9396.6	0.91	4538.8	0.91	2945.8		2.275	12044.3	2.275	4816.67	2.275	2352.64		1.69	12059	1.69	3659.68	1.69	4308.06
	0.455	12853.8	0.455	3259.74	0.455	4171.56		0.975	9315.69	0.975	4599.67	0.975	2855.08		2.34	11813.3	2.34	4653.36	2.34	2210.55		1.755	12267.4	1.755	3604.11	1.755	4146.41
	0.52	13221.4	0.52	3499.54	0.52	3981.35		1.04	9176.77	1.04	4518.87	1.04	2804.56		2.405	11435.4	2.405	4478.34	2.405	2093.67		1.82	12436.9	1.82	3543.83	1.82	4031.29
	0.585	14200.9	0.585	3538.93	0.585	3988.01		1.105	9039.01	1.105	4470.86	1.105	2867.87									1.885	12499.7	1.885	3577.97	1.885	3985.9
	0.65	14837	0.65	3488.39	0.65	3833.36		1.17	8890.24	1.17	4492.69	1.17	2855.24		0	10342	0	4351.56	0	1789.33		1.95	12669.8	1.95	3462.26	1.95	3797.43
	0.715	15254.8	0.715	3466.2	0.715	3712.88		1.235	8957.84	1.235	4450.02	1.235	2881.21		0.065	10070.6	0.065	4401.36	0.065	1843.2		2.015	12666.9	2.015	3460.48	2.015	3818.86
	0.78	15380.5	0.78	3516.36	0.78	3619.42		1.3	9151.51	1.3	4333.31	1.3	2997.53		0.13	9850.8	0.13	4438.41	0.13	1907.79		2.08	13177.4	2.08	3527.12	2.08	3682.34
	0.845	15401.7	0.845	3565.14	0.845	3583.45		1.365	9246.4	1.365	4329.2	1.365	3020.2		0.195	9904.24	0.195	4360.01	0.195	1863.97		2.145	13529	2.145	3352	2.145	3589.5
	0.91	15019.7	0.91	3586.12	0.91	3565.06		1.43	9509.98	1.43	4270.47	1.43	3111.17		0.26	9809.62	0.26	4201.89	0.26	2177.3
	0.975	14790.3	0.975	3530.36	0.975	3611.07		1.495	9540.07	1.495	4069.5	1.495	3168		0.325	9924.64	0.325	4341.05	0.325	2197.71		0	9661.75	0	3402.5	0	2567.5
	1.04	14644.8	1.04	3641.22	1.04	3586.22		1.56	9338.11	1.56	3999.2	1.56	3282		0.39	10049.6	0.39	4347.29	0.39	2305.43		0.065	9553.94	0.065	3356.37	0.065	2614.94
	1.105	14363.8	1.105	3673.36	1.105	3501.75		1.625	9273.37	1.625	3816.24	1.625	3510.24		0.455	10167.4	0.455	4403.62	0.455	2292.55		0.13	9469.47	0.13	3303.4	0.13	2756.35
	1.17	14437.1	1.17	3725.31	1.17	3629.03		1.69	9274.11	1.69	3818.91	1.69	3714.02		0.52	10224.3	0.52	4456.28	0.52	2249.53		0.195	9301.24	0.195	3217.17	0.195	2862.66
	1.235	14034.7	1.235	3766.21	1.235	3608.16		1.755	9339.73	1.755	3520.44	1.755	3707.89		0.585	10349.5	0.585	4439.05	0.585	2128.36		0.26	9287.74	0.26	3273.11	0.26	2945.63
	1.3	14031	1.3	3571.65	1.3	3589.68		1.82	9332.4	1.82	3298	1.82	3813.2		0.65	10474.3	0.65	4473.83	0.65	2122.87		0.325	9261.65	0.325	3295.49	0.325	2996.38
	1.365	14249.7	1.365	3595.56	1.365	3790.52		1.885	9194.6	1.885	3244.92	1.885	3738.02		0.715	10370.6	0.715	4605.19	0.715	2063.69		0.39	9377.08	0.39	3368.15	0.39	3010.17
	1.43	14414	1.43	3558.16	1.43	3987.32		1.95	9239.47	1.95	3096.33	1.95	3710.65		0.78	10189.5	0.78	4510.6	0.78	2000.19		0.455	9300.83	0.455	3354.09	0.455	2856.62
	1.495	14230.3	1.495	3438.6	1.495	4180.8		2.015	9496.69	2.015	2990.38	2.015	3613.47		0.845	10196.8	0.845	4534.16	0.845	2003.09		0.52	9572.01	0.52	3436.82	0.52	2803.88
	1.56	13886.7	1.56	3324.23	1.56	4351		2.08	9509.07	2.08	3012.25	2.08	3463.35		0.91	10807.5	0.91	4450.46	0.91	1967.91		0.585	9753.06	0.585	3528.83	0.585	2763.39
	1.625	13386.8	1.625	3263.46	1.625	4375.85		2.145	9502.59	2.145	2906.1	2.145	3398.87		0.975	10818.8	0.975	4414.79	0.975	1926.3		0.65	10166.3	0.65	3609.4	0.65	2644.22
	1.69	12686.5	1.69	3097.84	1.69	4350.36		2.21	9326.54	2.21	2947.11	2.21	3401.75		1.04	10907.5	1.04	4450.52	1.04	1872.95		0.715	10405	0.715	3672.24	0.715	2473.29
	1.755	12237.9	1.755	3089.16	1.755	4162.93		2.275	9644	2.275	2996	2.275	3175		1.105	10721.1	1.105	4388.79	1.105	1879.16		0.78	10296.7	0.78	3684	0.78	2484
	1.82	12191	1.82	2997.94	1.82	3764.12									1.17	10575.8	1.17	4344.27	1.17	1901.99		0.845	10454.7	0.845	3586.71	0.845	2341.42
	1.885	12171.1	1.885	2919.99	1.885	3486.64									1.235	10654.2	1.235	4292.23	1.235	1901.76		0.91	10213.9	0.91	3621.08	0.91	2353.42
	1.95	12233.8	1.95	2919.47	1.95	3417.68									1.3	10345.1	1.3	4266.59	1.3	1850.9		0.975	9843.25	0.975	3654.23	0.975	2285.78
	2.015	12020.9	2.015	2836.65	2.015	3326.57									1.365	9914.14	1.365	4084.61	1.365	2000.91		1.04	9844.13	1.04	3601.41	1.04	2185.13
	2.08	12127.2	2.08	2792.89	2.08	3360.9									1.43	9219.73	1.43	4078.71	1.43	2037.96		1.105	10123.4	1.105	3604.06	1.105	2153.62
	2.145	12247.1	2.145	2831.13	2.145	3338.02									1.495	9169.65	1.495	3748.42	1.495	2145.15		1.17	10377.9	1.17	3576	1.17	2338.25
	2.21	12170.9	2.21	2885.94	2.21	3347.43									1.56	9246.04	1.56	3679.08	1.56	2262.41		1.235	10586.9	1.235	3666.17	1.235	2343.3
	2.275	11916.5	2.275	2849.5	2.275	3271.5									1.625	8880.22	1.625	3643.52	1.625	2243.32		1.3	11079.7	1.3	3713.48	1.3	2395.41
															1.69	9002.3	1.69	3508.2	1.69	2254.44		1.365	11306.6	1.365	3779.24	1.365	2319.76
															1.755	9078.78	1.755	3328.7	1.755	2176.41		1.43	11140.9	1.43	3873.85	1.43	2455.68
															1.82	9277.06	1.82	3298.83	1.82	2096.97		1.495	11106.2	1.495	3808.14	1.495	2531.69
															1.885	9268.77	1.885	3271.48	1.885	2001.99		1.56	10846.4	1.56	3824.33	1.56	2451.08
															1.95	9704.12	1.95	3211.05	1.95	1937.54		1.625	10334.9	1.625	3836.44	1.625	2491.28
															2.015	9703.25	2.015	3236.05	2.015	1979.37		1.69	9801.13	1.69	3706.4	1.69	2646.13
																						1.755	9547.86	1.755	3663.84	1.755	2661.52
																						1.82	9533.22	1.82	3710.63	1.82	2780.3
																						1.885	9785.22	1.885	3554.27	1.885	2768.58
																						1.95	10471.9	1.95	3356.69	1.95	2648.48
																						2.015	11648.4	2.015	3257.03	2.015	2535.84
																						2.08	12989.8	2.08	3180.63	2.08	2563.82
																						2.145	13321.7	2.145	2998.57	2.145	2489.99
																						2.21	12742.4	2.21	2972.26	2.21	2427.43
																						2.275	11846.7	2.275	3050.49	2.275	2392.44
																						2.34	10831	2.34	2913	2.34	2327
																						0	10941.8	0	3271	0	3208.75
																						0.065	10686.2	0.065	3293.04	0.065	3286.44
																						0.13	10621.4	0.13	3305.99	0.13	3249.13
																						0.195	10516.7	0.195	3332.07	0.195	3174.44
																						0.26	10552.2	0.26	3285.05	0.26	3090.14
																						0.325	10508.2	0.325	3423.25	0.325	3215.43
																						0.39	10798.1	0.39	3476.18	0.39	3313.37
																						0.455	10579.9	0.455	3630.3	0.455	3196.49
																						0.52	10224.8	0.52	3643.94	0.52	3360.04
																						0.585	10028.5	0.585	3744.89	0.585	3295.27
																						0.65	10492.9	0.65	3869.06	0.65	3172.67
																						0.715	10882.1	0.715	4030.92	0.715	2917.07
																						0.78	11057.2	0.78	4111.01	0.78	2794.94
																						0.845	10933.6	0.845	4088.27	0.845	2790.76
																						0.91	11080.1	0.91	4115.02	0.91	2750.68
																						0.975	10956.9	0.975	4102.57	0.975	2747.61
																						1.04	10918	1.04	3981.93	1.04	2769.88
																						1.105	11082	1.105	3988	1.105	2735
																						1.17	10591.3	1.17	4060.19	1.17	2803.7
																						1.235	10712.6	1.235	4090.59	1.235	2774.09
																						1.3	10849.3	1.3	4175.48	1.3	2806.16
																						1.365	10934.5	1.365	4300.39	1.365	2846.94
																						1.43	11223.3	1.43	4226.81	1.43	2951.58
																						1.495	11310.6	1.495	4105.1	1.495	3134.59
																						1.56	10903.5	1.56	4052.62	1.56	3315.03
																						1.625	10528.8	1.625	3922.29	1.625	3411.32
																						1.69	10144.3	1.69	3685.21	1.69	3339.22
																						1.755	9741.76	1.755	3760.89	1.755	3187.41
																						1.82	10009.9	1.82	3581.26	1.82	3095.1
																						1.885	10000	1.885	3723.28	1.885	2950.93
																						1.95	9851.3	1.95	3581.82	1.95	2897.74
																						2.015	9800.25	2.015	3473.46	2.015	2827.78
																						2.08	10007.9	2.08	3499.33	2.08	2800.59
																						2.145	10377.5	2.145	3393.34	2.145	2740.59
																						2.21	10530	2.21	3309.75	2.21	2599.5

## Sheet: Analysis Untreated 
	Untreated
	HeLa_tetCENPBmCRMI1_STB-MG132_+Dox_BLM-RFP-BubR1-03.czi
		BLM	CENPB-mCherry-RMI1	BubR1											(IFX>0, X,0)
	Distance (microns)	Gray Value	Gray Value	Gray Value		Background Correction				Normalise to maximum value				Normalise to maximum value
	Background	12211.9	4230.2	3181.8	Maximum value	2643.1	2114.73	1041.18		BLM	CENPB-mCherry-RMI1	BubR1		BLM	CENPB-mCherry-RMI1	BubR1
	0	12776	4706	3628		564.1	475.8	446.2		0.213424	0.224993	0.428554		0.213424	0.224993	0.428554
	0.065	12409.8	4754.61	3934.45		197.87	524.41	752.649		0.0748629	0.24798	0.722884		0.0748629	0.24798	0.722884
	0.13	12621.3	5065.97	3880.97		409.37	835.77	699.167		0.154883	0.395214	0.671517		0.154883	0.395214	0.671517
	0.195	13330.2	5183.58	4043.84		1118.28	953.38	862.035		0.423094	0.450828	0.827944		0.423094	0.450828	0.827944
	0.26	13877.3	5399.36	4038.15		1665.41	1169.16	856.346		0.630097	0.552865	0.82248		0.630097	0.552865	0.82248
	0.325	14314.8	5615.7	4098.31		2102.85	1385.5	916.506		0.7956	0.655166	0.880261		0.7956	0.655166	0.880261
	0.39	14359	5811.73	3990.19		2147.13	1581.53	808.39		0.812353	0.747864	0.776421		0.812353	0.747864	0.776421
	0.455	13630.6	5932.01	3877.19		1418.69	1701.81	695.393		0.536752	0.804741	0.667893		0.536752	0.804741	0.667893
	0.52	12745.5	6025.26	3874.12		533.59	1795.06	692.321		0.20188	0.848836	0.664942		0.20188	0.848836	0.664942
	0.585	12405.7	6166.47	3840.17		193.81	1936.27	658.374		0.0733268	0.915611	0.632338		0.0733268	0.915611	0.632338
	0.65	12503.8	6144.75	3843.82		291.94	1914.55	662.018		0.110454	0.90534	0.635837		0.110454	0.90534	0.635837
	0.715	12650	6020	3809.67		438.1	1789.8	627.867		0.165752	0.846349	0.603037		0.165752	0.846349	0.603037
	0.78	13110.2	6133.52	3733.01		898.27	1903.32	551.208		0.339855	0.90003	0.52941		0.339855	0.90003	0.52941
	0.845	13291.5	6098.82	3708.98		1079.63	1868.62	527.181		0.408471	0.883621	0.506333		0.408471	0.883621	0.506333
	0.91	13260	6344.93	3680.43		1048.05	2114.73	498.635		0.396523	1	0.478916		0.396523	1	0.478916
	0.975	13340.9	6282	3732.32		1129.02	2051.8	550.522		0.427158	0.970242	0.528751		0.427158	0.970242	0.528751
	1.04	13297.8	6066.67	3698.36		1085.85	1836.47	516.555		0.410824	0.868418	0.496127		0.410824	0.868418	0.496127
	1.105	13129.9	6085.44	3675.04		918.02	1855.24	493.239		0.347327	0.877294	0.473733		0.347327	0.877294	0.473733
	1.17	13111.4	5955.87	3777.15		899.48	1725.67	595.349		0.340313	0.816024	0.571805		0.340313	0.816024	0.571805
	1.235	12540.9	5976.37	3783.8		328.95	1746.17	601.996		0.124456	0.825718	0.578189		0.124456	0.825718	0.578189
	1.3	13093.2	5834.25	3841.78		881.34	1604.05	659.985		0.333449	0.758513	0.633885		0.333449	0.758513	0.633885
	1.365	12926.5	5717.17	3978.81		714.62	1486.97	797.01		0.270372	0.703149	0.765491		0.270372	0.703149	0.765491
	1.43	13153.7	5623	3916.67		941.77	1392.8	734.867		0.356313	0.658618	0.705805		0.356313	0.658618	0.705805
	1.495	13514.3	5456.31	4035.35		1302.42	1226.11	853.55		0.492762	0.579795	0.819795		0.492762	0.579795	0.819795
	1.56	13789.1	5343.58	4151.57		1577.23	1113.38	969.77		0.596735	0.526488	0.931419		0.596735	0.526488	0.931419
	1.625	13835.9	5243.66	4132.89		1623.99	1013.46	951.087		0.614426	0.479238	0.913475		0.614426	0.479238	0.913475
	1.69	13836.5	5109	4222.98		1624.62	878.8	1041.18		0.614665	0.415561	1		0.614665	0.415561	1
	1.755	13837.2	4992.76	4212.82		1625.32	762.56	1031.02		0.614929	0.360594	0.990245		0.614929	0.360594	0.990245
	1.82	13785.5	4957	4073.41		1573.55	726.8	891.613		0.595343	0.343685	0.856353		0.595343	0.343685	0.856353
	1.885	13872.8	4915.11	4131.68		1660.86	684.91	949.875		0.628376	0.323876	0.912311		0.628376	0.323876	0.912311
	1.95	13953.4	4941.21	4023.9		1741.45	711.01	842.101		0.658866	0.336218	0.808799		0.658866	0.336218	0.808799
	2.015	14241.5	4803.69	4117.27		2029.57	573.49	935.47		0.767875	0.271188	0.898475		0.767875	0.271188	0.898475
	2.08	14484.1	4781.54	4015.89		2272.18	551.34	834.087		0.859665	0.260714	0.801102		0.859665	0.260714	0.801102
	2.145	14855	4703	3842		2643.1	472.8	660.2		1	0.223575	0.634091		1	0.223575	0.634091
	Background	12211.9	4230.2	3181.8	Maximum value	3781.02	1501.16	1793.29		1	1	1		1	1	1
	0	14166	4614	4041		1954.1	383.8	859.2		0.516818	0.255669	0.479119		0.516818	0.255669	0.479119
	0.065	13643.3	4706.09	3850.3		1431.41	475.89	668.5		0.378578	0.317015	0.372779		0.378578	0.317015	0.372779
	0.13	13466.4	4730.87	4063.88		1254.52	500.67	882.08		0.331794	0.333522	0.491878		0.331794	0.333522	0.491878
	0.195	13097.8	4719.47	4061.02		885.85	489.27	879.22		0.234289	0.325928	0.490283		0.234289	0.325928	0.490283
	0.26	13491.6	4782.64	4100.73		1279.66	552.44	918.93		0.338443	0.368009	0.512427		0.338443	0.368009	0.512427
	0.325	13306.4	4873.82	4201.2		1094.51	643.62	1019.4		0.289475	0.428748	0.568452		0.289475	0.428748	0.568452
	0.39	13138.6	4876.28	4429.81		926.69	646.08	1248.01		0.24509	0.430387	0.695933		0.24509	0.430387	0.695933
	0.455	13222.6	4946.6	4495.8		1010.7	716.4	1314		0.267309	0.477231	0.732731		0.267309	0.477231	0.732731
	0.52	13144.6	5005.21	4759.79		932.7	775.01	1577.99		0.246679	0.516274	0.879941		0.246679	0.516274	0.879941
	0.585	13272.2	5219.87	4903.67		1060.34	989.67	1721.87		0.280438	0.65927	0.960174		0.280438	0.65927	0.960174
	0.65	13077.1	5340.63	4792.65		865.2	1110.43	1610.85		0.228827	0.739715	0.898265		0.228827	0.739715	0.898265
	0.715	13221	5410.68	4725.54		1009.12	1180.48	1543.74		0.266891	0.786379	0.860842		0.266891	0.786379	0.860842
	0.78	13313.3	5314.28	4385.09		1101.38	1084.08	1203.29		0.291292	0.722162	0.670996		0.291292	0.722162	0.670996
	0.845	13479.4	5441.11	4160.55		1267.46	1210.91	978.75		0.335216	0.80665	0.545785		0.335216	0.80665	0.545785
	0.91	13542.8	5390.8	4064.4		1330.9	1160.6	882.6		0.351995	0.773135	0.492168		0.351995	0.773135	0.492168
	0.975	13742.3	5300.9	3880.65		1530.43	1070.7	698.85		0.404766	0.713248	0.389703		0.404766	0.713248	0.389703
	1.04	13898.3	5319.85	3917		1686.38	1089.65	735.2		0.446012	0.725872	0.409973		0.446012	0.725872	0.409973
	1.105	14001.3	5323.49	3961.22		1789.39	1093.29	779.42		0.473256	0.728297	0.434631		0.473256	0.728297	0.434631
	1.17	14064.9	5358.45	3899.71		1853.02	1128.25	717.91		0.490085	0.751585	0.400331		0.490085	0.751585	0.400331
	1.235	14175.6	5504.66	3912.87		1963.72	1274.46	731.07		0.519363	0.848983	0.40767		0.519363	0.848983	0.40767
	1.3	14760.3	5657.61	3907.92		2548.39	1427.41	726.12		0.673995	0.950871	0.404909		0.673995	0.950871	0.404909
	1.365	15359.2	5671	3870.4		3147.3	1440.8	688.6		0.832394	0.959791	0.383987		0.832394	0.959791	0.383987
	1.43	15992.9	5657.5	3979.14		3781.02	1427.3	797.34		1	0.950798	0.444624		1	0.950798	0.444624
	1.495	15816.9	5731.36	4107.62		3604.96	1501.16	925.82		0.953436	1	0.516269		0.953436	1	0.516269
	1.56	15308.2	5671.35	4330.77		3096.35	1441.15	1148.97		0.818919	0.960024	0.640705		0.818919	0.960024	0.640705
	1.625	14851.3	5438.29	4397.14		2639.37	1208.09	1215.34		0.698058	0.804771	0.677715		0.698058	0.804771	0.677715
	1.69	14629	5385.09	4513.56		2417.14	1154.89	1331.76		0.639283	0.769332	0.742635		0.639283	0.769332	0.742635
	1.755	14078.6	5253.76	4728.96		1866.71	1023.56	1547.16		0.493705	0.681846	0.862749		0.493705	0.681846	0.862749
	1.82	13641.4	5038	4888.8		1429.5	807.8	1707		0.378073	0.538117	0.951882		0.378073	0.538117	0.951882
	1.885	13455.3	4982.86	4975.09		1243.38	752.66	1793.29		0.328848	0.501386	1		0.328848	0.501386	1
	1.95	13197.2	4983.22	4692.08		985.3	753.02	1510.28		0.260591	0.501625	0.842184		0.260591	0.501625	0.842184
	2.015	13212.2	5026.25	4579.55		1000.35	796.05	1397.75		0.264571	0.53029	0.779433		0.264571	0.53029	0.779433
	2.08	13238.5	4869.27	4314.04		1026.61	639.07	1132.24		0.271517	0.425717	0.631376		0.271517	0.425717	0.631376
	2.145	13656.2	4844.73	4111.47		1444.32	614.53	929.67		0.381992	0.40937	0.518416		0.381992	0.40937	0.518416
	2.21	13836.6	4908.74	4242.3		1624.73	678.54	1060.5		0.429707	0.45201	0.591371		0.429707	0.45201	0.591371
	2.275	13598	5009	4118		1386.1	778.8	936.2		0.366594	0.518799	0.522057		0.366594	0.518799	0.522057
	Background	12211.9	4230.2	3181.8	Maximum value	1708.14	1346.07	1550.49		1	1	1		1	1	1
	0	12460	4785	3678		248.1	554.8	496.2		0.145246	0.412164	0.320028		0.145246	0.412164	0.320028
	0.065	12538.2	4813.92	3653.34		326.28	583.717	471.54		0.191015	0.433647	0.304123		0.191015	0.433647	0.304123
	0.13	12970	4832.42	3620.71		758.13	602.217	438.91		0.443834	0.447391	0.283078		0.443834	0.447391	0.283078
	0.195	13140.5	4875.11	3685.5		928.64	644.908	503.7		0.543656	0.479106	0.324865		0.543656	0.479106	0.324865
	0.26	13343.3	4857.51	3931.6		1131.39	627.31	749.8		0.662352	0.466032	0.483589		0.662352	0.466032	0.483589
	0.325	13562.4	4993.08	3925.12		1350.51	762.882	743.32		0.790632	0.56675	0.47941		0.790632	0.56675	0.47941
	0.39	13920	5026.5	4032.47		1708.14	796.299	850.67		1	0.591575	0.548646		1	0.591575	0.548646
	0.455	13776.7	5235.96	4200.16		1564.78	1005.76	1018.36		0.916072	0.747185	0.656799		0.916072	0.747185	0.656799
	0.52	13665.1	5387.26	4477.03		1453.17	1157.06	1295.23		0.850732	0.859583	0.835368		0.850732	0.859583	0.835368
	0.585	13452.6	5522.58	4641.29		1240.74	1292.38	1459.49		0.726369	0.960116	0.941309		0.726369	0.960116	0.941309
	0.65	13061.2	5563.59	4702.14		849.32	1333.39	1520.34		0.497219	0.990585	0.980555		0.497219	0.990585	0.980555
	0.715	12674.4	5576.27	4732.29		462.54	1346.07	1550.49		0.270786	1	1		0.270786	1	1
	0.78	12849.6	5446.92	4569.91		637.72	1216.72	1388.11		0.373342	0.90391	0.895272		0.373342	0.90391	0.895272
	0.845	12542	5335.02	4302.39		330.05	1104.82	1120.59		0.193222	0.820778	0.722733		0.193222	0.820778	0.722733
	0.91	12385.9	5254.04	4035.48		174.02	1023.84	853.68		0.101877	0.760617	0.550587		0.101877	0.760617	0.550587
	0.975	12307.1	5140.73	3891.65		95.18	910.535	709.85		0.0557214	0.676442	0.457823		0.0557214	0.676442	0.457823
	1.04	12013.8	5125.26	3945.8		-198.07	895.055	764		-0.115957	0.664942	0.492747		0	0.664942	0.492747
	1.105	11788.9	5007.98	3795.75		-423.05	777.776	613.95		-0.247667	0.577815	0.395972		0	0.577815	0.395972
	1.17	12021.9	5033.46	3882.55		-190.04	803.257	700.75		-0.111256	0.596745	0.451954		0	0.596745	0.451954
	1.235	11955.4	4921.91	3927.69		-256.55	691.707	745.89		-0.150193	0.513873	0.481067		0	0.513873	0.481067
	1.3	12631.1	5026.08	3802.41		419.24	795.882	620.61		0.245437	0.591266	0.400267		0.245437	0.591266	0.400267
	1.365	12291.2	5000.88	4111.72		79.26	770.68	929.92		0.0464013	0.572543	0.599759		0.0464013	0.572543	0.599759
	1.43	11937.3	4986.94	4245.97		-274.61	756.739	1064.17		-0.160766	0.562186	0.686344		0	0.562186	0.686344
	1.495	11505.4	4967.4	4366.83		-706.54	737.202	1185.03		-0.413631	0.547672	0.764294		0	0.547672	0.764294
	1.56	11571.4	4962.09	4425.83		-640.53	731.885	1244.03		-0.374987	0.543722	0.802346		0	0.543722	0.802346
	1.625	11719.8	5069.14	4414.88		-492.06	838.943	1233.08		-0.288068	0.623256	0.795284		0	0.623256	0.795284
	1.69	11826.9	5206.38	4417.27		-384.99	976.176	1235.47		-0.225386	0.725207	0.796826		0	0.725207	0.796826
	1.755	11886.3	5125.97	4419.23		-325.63	895.771	1237.43		-0.190634	0.665474	0.79809		0	0.665474	0.79809
	1.82	12014.2	5045.84	4329.04		-197.66	815.64	1147.24		-0.115717	0.605944	0.739921		0	0.605944	0.739921
	1.885	11963	5070.45	4205.6		-248.89	840.25	1023.8		-0.145708	0.624227	0.660307		0	0.624227	0.660307
	1.95	11519.1	4881.37	4208.65		-692.82	651.167	1026.85		-0.405599	0.483756	0.662275		0	0.483756	0.662275
	2.015	11283.7	4684.69	4080.61		-928.21	454.494	898.81		-0.543404	0.337646	0.579694		0	0.337646	0.579694
	2.08	11130.9	4734.39	3863.69		-1080.96	504.186	681.89		-0.632829	0.374563	0.43979		0	0.374563	0.43979
	2.145	11165.6	4588.34	3870.84		-1046.25	358.136	689.04		-0.612508	0.266061	0.444401		0	0.266061	0.444401
	2.21	11228.7	4616.81	3717.46		-983.23	386.614	535.66		-0.575614	0.287218	0.345478		0	0.287218	0.345478
	2.275	11604	4428	3929		-607.9	197.8	747.2		-0.355884	0.146947	0.481912		0	0.146947	0.481912
	Background	12211.9	4230.2	3181.8	Maximum value	1465.1	1106.41	1296.5		1	1	1		1	1	1		Distance (microns)
	0	13677	4538	4027		1465.1	307.8	845.2		1	0.278198	0.651909		1	0.278198	0.651909		0	0.292244	0.333085	0.378979
	0.065	13401.4	4474.81	3887.82		1189.5	244.612	706.02		0.81189	0.221087	0.544558		0.81189	0.221087	0.544558		0.065	0.24171	0.337026	0.411222
	0.13	13178.4	4433.4	4040.34		966.53	203.197	858.54		0.659702	0.183655	0.662198		0.659702	0.183655	0.662198		0.13	0.234184	0.360488	0.444137
	0.195	13089.3	4405.42	4192.24		877.44	175.219	1010.44		0.598894	0.158367	0.77936		0.598894	0.158367	0.77936		0.195	0.233974	0.386503	0.519159
	0.26	13068.1	4391.7	4245.22		856.22	161.499	1063.42		0.584411	0.145967	0.820224		0.584411	0.145967	0.820224		0.26	0.253451	0.410266	0.597077
	0.325	12885.8	4436.33	4406.78		673.88	206.127	1224.98		0.459955	0.186303	0.944836		0.459955	0.186303	0.944836		0.325	0.297388	0.489203	0.720112
	0.39	12741.8	4553.13	4368.7		529.85	322.933	1186.9		0.361648	0.291875	0.915465		0.361648	0.291875	0.915465		0.39	0.324112	0.538241	0.774223
	0.455	12702	4658.88	4435.6		490.06	428.68	1253.8		0.334489	0.387452	0.967065		0.334489	0.387452	0.967065		0.455	0.305855	0.601605	0.808494
	0.52	12659.6	4644.31	4478.3		447.66	414.109	1296.5		0.305549	0.374282	1		0.305549	0.374282	1		0.52	0.284413	0.666699	0.826478
	0.585	12648.4	4693.39	4415.71		436.54	463.19	1233.91		0.297959	0.418643	0.951724		0.297959	0.418643	0.951724		0.585	0.272029	0.729042	0.748099
	0.65	12760.1	4811.98	4204.86		548.16	581.779	1023.06		0.374145	0.525827	0.789094		0.374145	0.525827	0.789094		0.65	0.314425	0.793833	0.669079
	0.715	12755.5	4938.64	4019.31		543.58	708.441	837.51		0.371019	0.640307	0.645978		0.371019	0.640307	0.645978		0.715	0.329664	0.842271	0.554718
	0.78	12761.4	5092.66	3996.69		549.49	862.46	814.89		0.375053	0.779514	0.628531		0.375053	0.779514	0.628531		0.78	0.358592	0.854018	0.459036
	0.845	12628.3	4926.61	3860.89		416.36	696.406	679.09		0.284185	0.62943	0.523787		0.284185	0.62943	0.523787		0.845	0.379424	0.858447	0.408744
	0.91	12716.6	4799.92	3722.76		504.74	569.72	540.96		0.344509	0.514928	0.417246		0.344509	0.514928	0.417246		0.91	0.414405	0.854825	0.378371
	0.975	12596.4	4845.63	3653.65		384.53	615.433	471.85		0.26246	0.556244	0.363941		0.26246	0.556244	0.363941		0.975	0.456197	0.841139	0.341844
	1.04	12292.9	5005.89	3566.22		81.03	775.685	384.42		0.0553068	0.701084	0.296506		0.0553068	0.701084	0.296506		1.04	0.414189	0.831154	0.324388
	1.105	12287.1	4992.35	3620.02		75.16	762.149	438.22		0.0513003	0.68885	0.338002		0.0513003	0.68885	0.338002		1.105	0.408323	0.813525	0.347635
	1.17	12383.2	4953.46	3694.99		171.3	723.263	513.19		0.11692	0.653704	0.395827		0.11692	0.653704	0.395827		1.17	0.398745	0.798004	0.358861
	1.235	12521.2	5088.83	3556.82		309.32	858.633	375.02		0.211126	0.776055	0.289256		0.211126	0.776055	0.289256		1.235	0.354958	0.811207	0.361616
	1.3	12499.6	5214.14	3564.63		287.73	983.943	382.83		0.196389	0.889313	0.29528		0.196389	0.889313	0.29528		1.3	0.3871	0.81152	0.383175
	1.365	12541.7	5242.24	3602.92		329.82	1012.04	421.12		0.225118	0.914708	0.324813		0.225118	0.914708	0.324813		1.365	0.431492	0.794347	0.428517
	1.43	12566.8	5336.61	3626.29		354.9	1106.41	444.49		0.242236	1	0.342838		0.242236	1	0.342838		1.43	0.482405	0.80219	0.472197
	1.495	12219.2	5169.05	3828.17		7.27	938.854	646.37		0.00496212	0.84856	0.49855		0.00496212	0.84856	0.49855		1.495	0.463491	0.748103	0.574799
	1.56	12052.4	5098.78	4037.68		-159.55	868.583	855.88		-0.1089	0.785048	0.660147		0	0.785048	0.660147		1.56	0.45021	0.70319	0.661758
	1.625	12042.4	5002.18	4073.71		-169.51	771.984	891.91		-0.115699	0.697739	0.687937		0	0.697739	0.687937		1.625	0.416972	0.654901	0.719024
	1.69	11765.9	5084.56	4209.37		-446.03	854.36	1027.57		-0.304437	0.772193	0.792572		0	0.772193	0.792572		1.69	0.407796	0.592249	0.789183
	1.755	11548.5	4933.59	4152.57		-663.39	703.386	970.77		-0.452795	0.635738	0.748762		0	0.635738	0.748762		1.755	0.431838	0.496241	0.8373
	1.82	11363.9	4738	3977.84		-847.98	507.8	796.04		-0.578786	0.458963	0.613992		0	0.458963	0.613992		1.82	0.388915	0.42138	0.827698
	1.885	11196.6	4751.1	3940.79		-1015.29	520.901	758.99		-0.692983	0.470804	0.585415		0	0.470804	0.585415		1.885	0.39144	0.38252	0.759982
	1.95	11208.1	4700.57	3630.12		-1003.78	470.371	448.32		-0.685127	0.425133	0.345793		0	0.425133	0.345793		1.95	0.348055	0.340544	0.671432
	2.015	11375	4613.94	3344.85		-836.93	383.737	163.05		-0.571244	0.346831	0.125762		0	0.346831	0.125762		2.015	0.353129	0.314393	0.59382
	2.08	11450	4485.05	3310.87		-761.86	254.849	129.07		-0.520005	0.230339	0.0995526		0	0.230339	0.0995526		2.08	0.403039	0.287426	0.487017
	2.145	11357.7	4606.1	3426.3		-854.17	375.899	244.5		-0.583011	0.339747	0.188585		0	0.339747	0.188585		2.145	0.462938	0.278395	0.468754
	2.21	11398.2	4650.51	3526.03		-813.73	420.307	344.23		-0.555409	0.379884	0.265507		0	0.379884	0.265507		2.21	0.49568	0.237627	0.460552
	2.275	11754	4695	3482		-457.9	464.8	300.2		-0.312538	0.420098	0.231546		0	0.420098	0.231546		2.275	0.43419	0.224761	0.492823
	Background	12211.9	4230.2	3181.8	Maximum value	1122.75	2419.21	1417.08		1	1	1		1	1	1		2.34	0.450447	0.156149	0.507262
	0	13114	5509	3859		902.1	1278.8	677.2		0.803474	0.528602	0.477884		0.803474	0.528602	0.477884
	0.065	12781.1	5445.47	3963		569.16	1215.27	781.2		0.506934	0.502342	0.551274		0.506934	0.502342	0.551274
	0.13	13246.8	5705.88	4021.65		1034.92	1475.68	839.85		0.921772	0.609984	0.592662		0.921772	0.609984	0.592662
	0.195	13212.2	5931.53	4060.06		1000.34	1701.33	878.26		0.890973	0.703259	0.619767		0.890973	0.703259	0.619767
	0.26	13259.2	6111.18	4149.41		1047.34	1880.98	967.61		0.932835	0.777518	0.68282		0.932835	0.777518	0.68282
	0.325	13334.6	6466.35	4281.24		1122.75	2236.15	1099.44		1	0.924331	0.775849		1	0.924331	0.775849
	0.39	13017.7	6632.35	4505.18		805.81	2402.15	1323.38		0.717711	0.992948	0.933878		0.717711	0.992948	0.933878
	0.455	13096.9	6444	4479.29		885.04	2213.8	1297.49		0.788279	0.915092	0.915608		0.788279	0.915092	0.915608
	0.52	12915.2	6649.41	4487.47		703.34	2419.21	1305.67		0.626444	1	0.921381		0.626444	1	0.921381
	0.585	12471.8	6526.24	4338.71		259.92	2296.04	1156.91		0.231503	0.949087	0.816404		0.231503	0.949087	0.816404
	0.65	12318.3	6151	4192.76		106.39	1920.8	1010.96		0.0947584	0.793978	0.713411		0.0947584	0.793978	0.713411
	0.715	12224.8	6040.47	3773.53		12.92	1810.27	591.73		0.0115075	0.74829	0.41757		0.0115075	0.74829	0.41757
	0.78	12361.7	6056.35	3684		149.81	1826.15	502.2		0.133431	0.754854	0.354391		0.133431	0.754854	0.354391
	0.845	12528.2	5683.18	3357.88		316.28	1452.98	176.08		0.281701	0.600601	0.124256		0.281701	0.600601	0.124256
	0.91	12839.2	5441.53	3389.59		627.28	1211.33	207.79		0.5587	0.500713	0.146633		0.5587	0.500713	0.146633
	0.975	12474.2	5509.41	3225.94		262.28	1279.21	44.14		0.233605	0.528772	0.0311486		0.233605	0.528772	0.0311486
	1.04	11622.6	5306.41	3306.06		-589.31	1076.21	124.26		-0.524881	0.44486	0.0876874		0	0.44486	0.0876874
	1.105	11301	5209	3347		-910.9	978.8	165.2		-0.811312	0.404595	0.116578		0	0.404595	0.116578
	1.17	11276.4	5138.29	3343.35		-935.55	908.09	161.55		-0.833267	0.375366	0.114002		0	0.375366	0.114002
	1.235	11011.4	5336	3426.82		-1200.49	1105.8	245.02		-1.06924	0.457091	0.172905		0	0.457091	0.172905
	1.3	10782.5	5569.94	3382.29		-1429.43	1339.74	200.49		-1.27315	0.553792	0.141481		0	0.553792	0.141481
	1.365	10807.8	5525.24	3418.35		-1404.08	1295.04	236.55		-1.25057	0.535315	0.166928		0	0.535315	0.166928
	1.43	10633.6	5618.29	3355.18		-1578.31	1388.09	173.38		-1.40575	0.573778	0.12235		0	0.573778	0.12235
	1.495	10972.4	5487.53	3595.53		-1239.49	1257.33	413.73		-1.10398	0.519728	0.29196		0	0.519728	0.29196
	1.56	11137.6	5470	3850		-1074.31	1239.8	668.2		-0.956856	0.512481	0.471533		0	0.512481	0.471533
	1.625	11062.7	5267.12	3922.71		-1149.19	1036.92	740.91		-1.02355	0.428619	0.522843		0	0.428619	0.522843
	1.69	11089.2	5330.88	4146.71		-1122.66	1100.68	964.91		-0.99992	0.454975	0.680914		0	0.454975	0.680914
	1.755	11042.2	5214.18	4598.88		-1169.72	983.98	1417.08		-1.04183	0.406736	1		0	0.406736	1
	1.82	11130.4	4862.12	4347.12		-1081.55	631.92	1165.32		-0.963304	0.261209	0.822339		0	0.261209	0.822339
	1.885	11016.8	4861.35	4282.18		-1195.14	631.15	1100.38		-1.06448	0.260891	0.776512		0	0.260891	0.776512
	1.95	10832.1	4783.94	3995.41		-1379.84	553.74	813.61		-1.22898	0.228893	0.574145		0	0.228893	0.574145
	2.015	10960.4	4702	3790.12		-1251.55	471.8	608.32		-1.11472	0.195022	0.429277		0	0.195022	0.429277
	2.08	10795.8	4581.41	3431.12		-1416.14	351.21	249.32		-1.26131	0.145175	0.175939		0	0.145175	0.175939
	2.145	11307	4600.18	3487.41		-904.9	369.98	305.61		-0.805967	0.152934	0.215662		0	0.152934	0.215662
	2.21	11335	4514	3365		-876.9	283.8	183.2		-0.781029	0.117311	0.12928		0	0.117311	0.12928
	Background	12211.9	4230.2	3181.8	Maximum value	870.48	1295.08	1409		1	1	1		1	1	1
	0	12537	4833	4187		325.1	602.8	1005.2		0.373472	0.465454	0.713414		0.373472	0.465454	0.713414
	0.065	12570.6	4702.07	4235.88		358.71	471.87	1054.08		0.412083	0.364356	0.748103		0.412083	0.364356	0.748103
	0.13	12296.1	4741.63	4194.63		84.2	511.43	1012.83		0.0967282	0.394902	0.718828		0.0967282	0.394902	0.718828
	0.195	12062.5	4717.06	4386.34		-149.37	486.86	1204.54		-0.171595	0.37593	0.854892		0	0.37593	0.854892
	0.26	12348.8	4669.44	4340.9		136.85	439.24	1159.1		0.157212	0.339161	0.822639		0.157212	0.339161	0.822639
	0.325	12552	4974	4471.86		340.14	743.8	1290.06		0.39075	0.574327	0.915583		0.39075	0.574327	0.915583
	0.39	13082.4	4998.55	4568.41		870.48	768.35	1386.61		1	0.593284	0.984111		1	0.593284	0.984111
	0.455	13027.8	5128.12	4590.8		815.9	897.92	1409		0.937299	0.693332	1		0.937299	0.693332	1
	0.52	12820.8	5052.94	4577.28		608.87	822.74	1395.48		0.699465	0.635281	0.990406		0.699465	0.635281	0.990406
	0.585	12490.9	5100.82	4462.34		279.02	870.62	1280.54		0.320536	0.672252	0.908831		0.320536	0.672252	0.908831
	0.65	12399.5	5062.08	4433.1		187.57	831.88	1251.3		0.215479	0.642339	0.888078		0.215479	0.642339	0.888078
	0.715	12433.7	5176.32	4292.31		221.8	946.12	1110.51		0.254802	0.730549	0.788158		0.254802	0.730549	0.788158
	0.78	12327.7	5285.79	4282.76		115.78	1055.59	1100.95		0.133007	0.815077	0.781373		0.133007	0.815077	0.781373
	0.845	12491	5359.37	4244.29		279.06	1129.17	1062.49		0.320582	0.871892	0.754074		0.320582	0.871892	0.754074
	0.91	12623.7	5436.92	4111.36		411.78	1206.72	929.56		0.473049	0.931773	0.65973		0.473049	0.931773	0.65973
	0.975	12809.4	5410.35	4090.57		597.45	1180.15	908.772		0.686345	0.911256	0.644977		0.686345	0.911256	0.644977
	1.04	12919.8	5436.21	4073.52		707.94	1206.01	891.718		0.813275	0.931224	0.632873		0.813275	0.931224	0.632873
	1.105	12902.4	5505.26	4155.94		690.52	1275.06	974.143		0.793263	0.984541	0.691372		0.793263	0.984541	0.691372
	1.17	12951.7	5525.28	4222.26		739.84	1295.08	1040.46		0.849922	1	0.738436		0.849922	1	0.738436
	1.235	12837.9	5466.4	4223.14		625.97	1236.2	1041.34		0.719109	0.954536	0.739066		0.719109	0.954536	0.739066
	1.3	12742.3	5299.82	4218.76		530.43	1069.62	1036.95		0.609353	0.82591	0.735951		0.609353	0.82591	0.735951
	1.365	12839.3	5175	4147.8		627.38	944.8	966		0.720729	0.72953	0.685593		0.720729	0.72953	0.685593
	1.43	12859.5	5217.34	4120.06		647.55	987.14	938.258		0.7439	0.762223	0.665903		0.7439	0.762223	0.665903
	1.495	12734.6	5121.78	4221.53		522.72	891.58	1039.73		0.600496	0.688436	0.737923		0.600496	0.688436	0.737923
	1.56	12716.3	5070.94	4249.18		504.38	840.74	1067.38		0.579427	0.64918	0.757544		0.579427	0.64918	0.757544
	1.625	12767.5	5060.57	4422.77		555.57	830.37	1240.97		0.638234	0.641173	0.880749		0.638234	0.641173	0.880749
	1.69	12783.9	4857.89	4439.68		572.02	627.69	1257.88		0.657132	0.484673	0.892746		0.657132	0.484673	0.892746
	1.755	12769.5	4914.02	4482.07		557.56	683.82	1300.27		0.64052	0.528014	0.922835		0.64052	0.528014	0.922835
	1.82	12581.3	4751.44	4509.88		369.42	521.24	1328.08		0.424387	0.402477	0.942569		0.424387	0.402477	0.942569
	1.885	12680.2	4698.53	4563.58		468.32	468.33	1381.78		0.538002	0.361622	0.980682		0.538002	0.361622	0.980682
	1.95	12529.2	4597.22	4468.67		317.32	367.02	1286.87		0.364535	0.283396	0.913324		0.364535	0.283396	0.913324
	2.015	12447.7	4515.42	4352.95		235.82	285.22	1171.15		0.270908	0.220233	0.831192		0.270908	0.220233	0.831192
	2.08	12337.2	4485.51	4141.79		125.34	255.31	959.993		0.14399	0.197138	0.681329		0.14399	0.197138	0.681329
	2.145	12155.2	4513.2	3965.14		-56.65	283	783.342		-0.065079	0.218519	0.555956		0	0.218519	0.555956
	2.21	12299	4438.39	3820.6		87.06	208.19	638.804		0.100014	0.160755	0.453374		0.100014	0.160755	0.453374
	2.275	12078	4507	3754		-133.9	276.8	572.2		-0.153823	0.213732	0.406104		0	0.213732	0.406104
	Background	12211.9	4230.2	3181.8	Maximum value	2957.36	1732.13	1786.7		1	1	1		1	1	1
	0	13877	4782	3887		1665.1	551.8	705.2		0.563036	0.318567	0.394694		0.563036	0.318567	0.394694
	0.065	13298	4813.89	4139.5		1086.06	583.69	957.7		0.36724	0.336978	0.536016		0.36724	0.336978	0.536016
	0.13	13161.8	4756.93	4074.9		949.91	526.73	893.1		0.321202	0.304094	0.49986		0.321202	0.304094	0.49986
	0.195	12790.4	4826.22	4039.14		578.53	596.02	857.34		0.195624	0.344097	0.479846		0.195624	0.344097	0.479846
	0.26	12921.4	4924.11	4359.43		709.54	693.91	1177.63		0.239923	0.400611	0.659109		0.239923	0.400611	0.659109
	0.325	13144.7	5145.06	4582.86		932.8	914.86	1401.06		0.315416	0.528171	0.784161		0.315416	0.528171	0.784161
	0.39	13029.7	5241	4573.72		817.82	1010.8	1391.92		0.276537	0.583559	0.779045		0.276537	0.583559	0.779045
	0.455	13001.6	5331.35	4725.61		789.68	1101.15	1543.81		0.267022	0.63572	0.864057		0.267022	0.63572	0.864057
	0.52	12873.9	5403.9	4833.21		662	1173.7	1651.41		0.223848	0.677605	0.924279		0.223848	0.677605	0.924279
	0.585	12822.1	5420.12	4746.62		610.22	1189.92	1564.82		0.206339	0.686969	0.875816		0.206339	0.686969	0.875816
	0.65	13167	5450.7	4537.53		955.1	1220.5	1355.73		0.322957	0.704624	0.75879		0.322957	0.704624	0.75879
	0.715	13160.4	5355.2	4197.61		948.52	1125	1015.81		0.320732	0.649489	0.56854		0.320732	0.649489	0.56854
	0.78	13000	5321	4061.11		788.1	1090.8	879.31		0.266488	0.629745	0.492142		0.266488	0.629745	0.492142
	0.845	13115.5	5362.44	4079.31		903.58	1132.24	897.51		0.305536	0.653669	0.502328		0.305536	0.653669	0.502328
	0.91	13089.3	5475.56	3961.51		877.43	1245.36	779.71		0.296694	0.718976	0.436397		0.296694	0.718976	0.436397
	0.975	13320.8	5574.18	3990.43		1108.86	1343.98	808.63		0.374949	0.775912	0.452583		0.374949	0.775912	0.452583
	1.04	13540.2	5672.23	3920.22		1328.27	1442.03	738.42		0.44914	0.832518	0.413287		0.44914	0.832518	0.413287
	1.105	13804	5745.02	3915.68		1592.12	1514.82	733.88		0.538359	0.874542	0.410746		0.538359	0.874542	0.410746
	1.17	14170	5787.5	3781		1958.1	1557.3	599.2		0.662111	0.899066	0.335367		0.662111	0.899066	0.335367
	1.235	14774.2	5816.76	3860.71		2562.27	1586.56	678.91		0.866404	0.915959	0.37998		0.866404	0.915959	0.37998
	1.3	14775.2	5833.64	3817.73		2563.31	1603.44	635.93		0.866756	0.925704	0.355924		0.866756	0.925704	0.355924
	1.365	15169.3	5898.67	3788.67		2957.36	1668.47	606.87		1	0.963248	0.33966		1	0.963248	0.33966
	1.43	14924.4	5962.33	4028.57		2712.46	1732.13	846.77		0.91719	1	0.47393		0.91719	1	0.47393
	1.495	14657.4	5824.38	4232.41		2445.5	1594.18	1050.61		0.82692	0.920358	0.588017		0.82692	0.920358	0.588017
	1.56	14369.4	5746.33	4464.89		2157.54	1516.13	1283.09		0.729549	0.875298	0.718134		0.729549	0.875298	0.718134
	1.625	14040.8	5663.76	4708.87		1828.91	1433.56	1527.07		0.618427	0.827628	0.854687		0.618427	0.827628	0.854687
	1.69	13929	5465.66	4900.98		1717.11	1235.46	1719.18		0.580623	0.713261	0.96221		0.580623	0.713261	0.96221
	1.755	13484.4	5205.38	4968.5		1272.48	975.18	1786.7		0.430276	0.562995	1		0.430276	0.562995	1
	1.82	13060	5056.43	4951.21		848.15	826.23	1769.41		0.286793	0.477002	0.990323		0.286793	0.477002	0.990323
	1.885	12906.9	4918.25	4912.55		694.96	688.05	1730.75		0.234993	0.397228	0.968685		0.234993	0.397228	0.968685
	1.95	12844.8	4888.44	4640.94		632.93	658.24	1459.14		0.214019	0.380018	0.816668		0.214019	0.380018	0.816668
	2.015	13466.6	4934.08	4190.42		1254.68	703.88	1008.62		0.424257	0.406367	0.564516		0.424257	0.406367	0.564516
	2.08	14229	4828.9	4020.09		2017.06	598.7	838.29		0.682048	0.345644	0.469183		0.682048	0.345644	0.469183
	2.145	14548.1	4932.17	3968.94		2336.25	701.97	787.14		0.789978	0.405264	0.440555		0.789978	0.405264	0.440555
	2.21	14442.7	4961.35	3940.07		2230.83	731.15	758.27		0.754332	0.42211	0.424397		0.754332	0.42211	0.424397
	2.275	13642.6	4995.04	3943.42		1430.73	764.84	761.62		0.483786	0.44156	0.426272		0.483786	0.44156	0.426272
	2.34	13276	5009	4041		1064.1	778.8	859.2		0.359814	0.44962	0.480887		0.359814	0.44962	0.480887
	HeLa_tetCENPBmCRMI1_STB-MG132_+Dox_BLM-RFP-BubR1-10.czi													0	0	0
	Background	11211.9	3930.2	3081.8	Maximum value	974.96	1099.88	924.09		1	1	1		1	1	1
	0	7907	3048.5	2554		-3304.9	-881.7	-527.8		-3.38978	-0.801633	-0.571156		0	0	0
	0.065	7691.53	3132.06	2765.11		-3520.37	-798.14	-316.69		-3.61078	-0.725661	-0.342705		0	0	0
	0.13	7903.89	3194.56	2812.56		-3308.01	-735.64	-269.24		-3.39297	-0.668837	-0.291357		0	0	0
	0.195	8128.5	3352.75	2861.33		-3083.4	-577.45	-220.47		-3.16259	-0.525012	-0.238581		0	0	0
	0.26	7979	3478.78	3148.78		-3232.9	-451.42	66.98		-3.31593	-0.410427	0.0724821		0	0	0.0724821
	0.325	8550.28	3477.36	3361.08		-2661.62	-452.84	279.28		-2.72998	-0.411718	0.302222		0	0	0.302222
	0.39	8446.67	3750	3676.67		-2765.23	-180.2	594.87		-2.83625	-0.163836	0.643736		0	0	0.643736
	0.455	9031.86	3871.31	3660.61		-2180.04	-58.89	578.81		-2.23603	-0.0535422	0.626357		0	0	0.626357
	0.52	8982.44	3882.56	3871.56		-2229.46	-47.64	789.76		-2.28672	-0.0433138	0.854635		0	0	0.854635
	0.585	9223.5	4158.25	3790.5		-1988.4	228.05	708.7		-2.03947	0.207341	0.766917		0	0.207341	0.766917
	0.65	9646.56	4440.89	3735.89		-1565.34	510.69	654.09		-1.60554	0.464314	0.707821		0	0.464314	0.707821
	0.715	10437.6	4545.36	3520.97		-774.32	615.16	439.17		-0.794207	0.559297	0.475246		0	0.559297	0.475246
	0.78	10803.3	4541.83	3309.17		-408.57	611.63	227.37		-0.419063	0.556088	0.246047		0	0.556088	0.246047
	0.845	11088.6	4636.28	3184.28		-123.32	706.08	102.48		-0.126487	0.641961	0.110898		0	0.641961	0.110898
	0.91	10846.9	4687.56	3212.89		-365.01	757.36	131.09		-0.374385	0.688584	0.141858		0	0.688584	0.141858
	0.975	10894.3	5030.08	3011.42		-317.57	1099.88	-70.38		-0.325726	1	-0.0761614		0	1	0
	1.04	10679.8	4846	3086.89		-532.07	915.8	5.09		-0.545735	0.832636	0.00550812		0	0.832636	0.00550812
	1.105	10253.2	4676.17	3027.17		-958.71	745.97	-54.63		-0.983333	0.678229	-0.0591176		0	0.678229	0
	1.17	9915	4688	3042		-1296.9	757.8	-39.8		-1.33021	0.688984	-0.0430694		0	0.688984	0
	1.235	9837.06	4536.11	2993		-1374.84	605.91	-88.8		-1.41015	0.550887	-0.0960945		0	0.550887	0
	1.3	9890.17	4662.67	3090.67		-1321.73	732.47	8.87		-1.35568	0.665954	0.00959863		0	0.665954	0.00959863
	1.365	10083.8	4660.42	3075.17		-1128.15	730.22	-6.63		-1.15712	0.663909	-0.00717463		0	0.663909	0
	1.43	9913.22	4681.11	3095.67		-1298.68	750.91	13.87		-1.33203	0.68272	0.0150094		0	0.68272	0.0150094
	1.495	10148.6	4848.17	3418.44		-1063.32	917.97	336.64		-1.09063	0.834609	0.364294		0	0.834609	0.364294
	1.56	10293	4644.83	3283.17		-918.9	714.63	201.37		-0.9425	0.649735	0.217912		0	0.649735	0.217912
	1.625	10450.8	4449.81	3502		-761.09	519.61	420.2		-0.780637	0.472424	0.454718		0	0.472424	0.454718
	1.69	10249.2	4308.78	3532.44		-962.68	378.58	450.64		-0.987405	0.344201	0.487658		0	0.344201	0.487658
	1.755	10491.8	4119.25	3724.25		-720.15	189.05	642.45		-0.738646	0.171882	0.695224		0	0.171882	0.695224
	1.82	10580.2	4078.44	4005.89		-631.73	148.24	924.09		-0.647955	0.134778	1		0	0.134778	1
	1.885	11160.8	3862.36	3955.83		-51.12	-67.84	874.03		-0.0524329	-0.0616795	0.945828		0	0	0.945828
	1.95	11255.3	3592	3787.67		43.43	-338.2	705.87		0.0445454	-0.307488	0.763854		0.0445454	0	0.763854
	2.015	11409.4	3480.36	3604		197.46	-449.84	522.2		0.202531	-0.40899	0.565096		0.202531	0	0.565096
	2.08	11462.1	3261.22	3410.28		250.21	-668.98	328.48		0.256636	-0.60823	0.355463		0.256636	0	0.355463
	2.145	11952.8	3261.17	3389		740.85	-669.03	307.2		0.759877	-0.608275	0.332435		0.759877	0	0.332435
	2.21	11974.9	3175.22	3411.22		762.99	-754.98	329.42		0.782586	-0.68642	0.35648		0.782586	0	0.35648
	2.275	12186.9	3265.94	3476.64		974.96	-664.26	394.84		1	-0.603939	0.427274		1	0	0.427274
	2.34	12035.5	3280	3425		823.6	-650.2	343.2		0.844753	-0.591155	0.371392		0.844753	0	0.371392
	Background	12211.9	3930.2	3081.8	Maximum value	1693.66	444.47	2159.53		1	1	1		1	1	1
	0	10911	3475	4083		-1300.9	-455.2	1001.2		-0.7681	-1.02414	0.463619		0	0	0.463619
	0.065	11146.7	3472.44	4321.56		-1065.23	-457.76	1239.76		-0.628952	-1.0299	0.574088		0	0	0.574088
	0.13	11372.4	3265.78	4170.22		-839.46	-664.42	1088.42		-0.495648	-1.49486	0.504008		0	0	0.504008
	0.195	11778	3412.67	4331		-433.9	-517.53	1249.2		-0.256191	-1.16438	0.578459		0	0	0.578459
	0.26	11822	3302.22	4346.78		-389.9	-627.98	1264.98		-0.230211	-1.41287	0.585766		0	0	0.585766
	0.325	11652.4	3463.22	4466.78		-559.46	-466.98	1384.98		-0.330326	-1.05064	0.641334		0	0	0.641334
	0.39	11444.3	3359.67	4479.33		-767.57	-570.53	1397.53		-0.453202	-1.28362	0.647145		0	0	0.647145
	0.455	11549.4	3509.78	4639.78		-662.46	-420.42	1557.98		-0.391141	-0.945891	0.721444		0	0	0.721444
	0.52	11191.1	3644	4926.22		-1020.79	-286.2	1844.42		-0.602712	-0.643913	0.854084		0	0	0.854084
	0.585	11423	3790	4722		-788.9	-140.2	1640.2		-0.465796	-0.315432	0.759517		0	0	0.759517
	0.65	11290.6	4072.89	4688.89		-921.34	142.69	1607.09		-0.543993	0.321034	0.744185		0	0.321034	0.744185
	0.715	11140	4271.22	4558.44		-1071.9	341.02	1476.64		-0.63289	0.767251	0.683778		0	0.767251	0.683778
	0.78	11098.7	4270	4366		-1113.23	339.8	1284.2		-0.657292	0.764506	0.594666		0	0.764506	0.594666
	0.845	11136	4354	4110.56		-1075.9	423.8	1028.76		-0.635251	0.953495	0.476381		0	0.953495	0.476381
	0.91	10894.9	4373.11	4269.89		-1317.01	442.91	1188.09		-0.777612	0.99649	0.550161		0	0.99649	0.550161
	0.975	11264.7	4148.33	4077		-947.23	218.13	995.2		-0.55928	0.490764	0.460841		0	0.490764	0.460841
	1.04	10982.3	4087.89	4084.89		-1229.57	157.69	1003.09		-0.725984	0.354782	0.464495		0	0.354782	0.464495
	1.105	11283.8	4133.67	4146.33		-928.12	203.47	1064.53		-0.547997	0.457781	0.492945		0	0.457781	0.492945
	1.17	11000	3915	4024		-1211.9	-15.2	942.2		-0.715551	-0.034198	0.436299		0	0	0.436299
	1.235	11498	4116.22	4065.56		-713.9	186.02	983.76		-0.421513	0.418521	0.455544		0	0.418521	0.455544
	1.3	11305.8	3996.44	3977.56		-906.12	66.24	895.76		-0.535007	0.149031	0.414794		0	0.149031	0.414794
	1.365	11153	4042	4292.33		-1058.9	111.8	1210.53		-0.625214	0.251536	0.560553		0	0.251536	0.560553
	1.43	11414.4	4204.78	4181		-797.46	274.58	1099.2		-0.47085	0.617769	0.509		0	0.617769	0.509
	1.495	11222.7	4085.11	4180.56		-989.23	154.91	1098.76		-0.584078	0.348527	0.508796		0	0.348527	0.508796
	1.56	11251.7	4193	4335.67		-960.23	262.8	1253.87		-0.566956	0.591266	0.580622		0	0.591266	0.580622
	1.625	11792.2	4374.67	4373.67		-419.68	444.47	1291.87		-0.247795	1	0.598218		0	1	0.598218
	1.69	12193.3	4277.22	4639		-18.57	347.02	1557.2		-0.0109644	0.78075	0.721083		0	0.78075	0.721083
	1.755	13405	4060	4773		1193.1	129.8	1691.2		0.704451	0.292033	0.783133		0.704451	0.292033	0.783133
	1.82	13905.6	4015.44	4999.33		1693.66	85.24	1917.53		1	0.191779	0.887939		1	0.191779	0.887939
	1.885	13302.8	3783.22	5236		1090.88	-146.98	2154.2		0.644096	-0.330686	0.997532		0.644096	0	0.997532
	1.95	12749	3699.67	5241.33		537.1	-230.53	2159.53		0.317124	-0.518663	1		0.317124	0	1
	2.015	12100.9	3558.44	5113.56		-111.01	-371.76	2031.76		-0.0655444	-0.836412	0.940834		0	0	0.940834
	2.08	12062.4	3541	4917		-149.46	-389.2	1835.2		-0.0882468	-0.87565	0.849815		0	0	0.849815
	2.145	12412	3351	4616.67		200.1	-579.2	1534.87		0.118146	-1.30313	0.710743		0.118146	0	0.710743
	2.21	12626	3343.11	4728.89		414.1	-587.09	1647.09		0.2445	-1.32088	0.762708		0.2445	0	0.762708
	2.275	12623.9	3268.56	4661.78		411.99	-661.64	1579.98		0.243254	-1.4886	0.731631		0.243254	0	0.731631
	2.34	12511	3463	4608		299.1	-467.2	1526.2		0.1766	-1.05114	0.706728		0.1766	0	0.706728
	Background	12211.9	3930.2	3081.8	Maximum value	2543.1	2867.8	2422.98		1	1	1		1	1	1
	0	12605	3976	4691		393.1	45.8	1609.2		0.154575	0.0159704	0.664141		0.154575	0.0159704	0.664141
	0.065	12420.2	3909.22	4751.33		208.32	-20.98	1669.53		0.0819158	-0.00731571	0.689042		0.0819158	0	0.689042
	0.13	12800	4044	4898		588.1	113.8	1816.2		0.231253	0.039682	0.749573		0.231253	0.039682	0.749573
	0.195	12698.7	4303.83	5097		486.77	373.63	2015.2		0.191408	0.130285	0.831704		0.191408	0.130285	0.831704
	0.26	12610.8	4354.78	5185.44		398.88	424.58	2103.64		0.156848	0.148051	0.868206		0.156848	0.148051	0.868206
	0.325	12784.3	4751.33	5353.89		572.43	821.13	2272.09		0.225091	0.286327	0.937726		0.225091	0.286327	0.937726
	0.39	12860.3	4969.67	5173		648.43	1039.47	2091.2		0.254976	0.362463	0.86307		0.254976	0.362463	0.86307
	0.455	12915.6	5473.56	5070.56		703.66	1543.36	1988.76		0.276694	0.538169	0.82079		0.276694	0.538169	0.82079
	0.52	13436.8	5849.11	5263.56		1224.88	1918.91	2181.76		0.481648	0.669123	0.900444		0.481648	0.669123	0.900444
	0.585	13916.5	6170.5	4987.5		1704.6	2240.3	1905.7		0.670284	0.781191	0.786511		0.670284	0.781191	0.786511
	0.65	14299.9	6353	4925		2087.99	2422.8	1843.2		0.821041	0.844829	0.760717		0.821041	0.844829	0.760717
	0.715	14725.7	6657.11	4833.94		2513.77	2726.91	1752.14		0.988467	0.950872	0.723137		0.988467	0.950872	0.723137
	0.78	14755	6798	4948.33		2543.1	2867.8	1866.53		1	1	0.770347		1	1	0.770347
	0.845	13968.8	6604.11	4834		1756.93	2673.91	1752.2		0.690862	0.932391	0.72316		0.690862	0.932391	0.72316
	0.91	13473.2	6549.44	4920.22		1261.32	2619.24	1838.42		0.495977	0.913327	0.758745		0.495977	0.913327	0.758745
	0.975	13557.2	6374.33	4957		1345.27	2444.13	1875.2		0.528988	0.852267	0.773924		0.528988	0.852267	0.773924
	1.04	13808	6535.11	4747.89		1596.1	2604.91	1666.09		0.62762	0.90833	0.68762		0.62762	0.90833	0.68762
	1.105	14138	6337.22	4887.06		1926.1	2407.02	1805.26		0.757383	0.839326	0.745057		0.757383	0.839326	0.745057
	1.17	14304	6091	4770		2092.1	2160.8	1688.2		0.822657	0.75347	0.696746		0.822657	0.75347	0.696746
	1.235	14060.7	5687.61	4763.67		1848.82	1757.41	1681.87		0.726995	0.612808	0.694132		0.726995	0.612808	0.694132
	1.3	14113.6	5609.11	4966.89		1901.66	1678.91	1885.09		0.747772	0.585435	0.778005		0.747772	0.585435	0.778005
	1.365	14106.2	5309.33	5023.67		1894.27	1379.13	1941.87		0.744867	0.480902	0.801438		0.744867	0.480902	0.801438
	1.43	13852.1	4971.89	5067.44		1640.21	1041.69	1985.64		0.644965	0.363237	0.819506		0.644965	0.363237	0.819506
	1.495	13793.7	4822	5451.44		1581.82	891.8	2369.64		0.622005	0.31097	0.977988		0.622005	0.31097	0.977988
	1.56	14262.3	4427	5414.67		2050.43	496.8	2332.87		0.806272	0.173234	0.96281		0.806272	0.173234	0.96281
	1.625	14546.8	4160	5485		2334.88	229.8	2403.2		0.918124	0.0801311	0.991837		0.918124	0.0801311	0.991837
	1.69	14662.4	4147.78	5504.78		2450.54	217.58	2422.98		0.963603	0.07587	1		0.963603	0.07587	1
	1.755	14214.5	4036.5	5429.5		2002.6	106.3	2347.7		0.787464	0.0370667	0.968932		0.787464	0.0370667	0.968932
	1.82	13371.3	3838.78	5280.33		1159.43	-91.42	2198.53		0.455912	-0.0318781	0.907368		0.455912	0	0.907368
	1.885	13344.7	3699.67	5270.44		1132.82	-230.53	2188.64		0.445448	-0.0803857	0.903287		0.445448	0	0.903287
	1.95	13664	3798.33	5064.33		1452.1	-131.87	1982.53		0.570996	-0.045983	0.818222		0.570996	0	0.818222
	2.015	13980	3688.39	5096.94		1768.1	-241.81	2015.14		0.695254	-0.084319	0.831681		0.695254	0	0.831681
	2.08	14572	3725.78	4999.22		2360.1	-204.42	1917.42		0.928041	-0.0712811	0.791349		0.928041	0	0.791349
	2.145	14012.3	3681.83	5022.17		1800.43	-248.37	1940.37		0.707967	-0.0866065	0.800819		0.707967	0	0.800819
	2.21	13663.6	3719.44	4858.67		1451.66	-210.76	1776.87		0.570823	-0.0734919	0.73334		0.570823	0	0.73334
	2.275	13416	3668	5152.22		1204.1	-262.2	2070.42		0.473477	-0.091429	0.854495		0.473477	0	0.854495
	2.34	13426	3580	4976		1214.1	-350.2	1894.2		0.477409	-0.122115	0.781765		0.477409	0	0.781765
	Background	12211.9	3930.2	3081.8	Maximum value	3636.89	3124.17	1357.15		1	1	1		1	1	1
	0	10294	3608	3277		-1917.9	-322.2	195.2		-0.527346	-0.103131	0.143831		0	0	0.143831
	0.065	10224.7	3557.53	3385.21		-1987.22	-372.67	303.41		-0.546406	-0.119286	0.223564		0	0	0.223564
	0.13	10013.5	3592.37	3384.05		-2198.43	-337.83	302.25		-0.604481	-0.108134	0.222709		0	0	0.222709
	0.195	10307.8	3703.79	3537.32		-1904.11	-226.41	455.52		-0.523554	-0.0724704	0.335645		0	0	0.335645
	0.26	10359	3809.37	3786		-1852.95	-120.83	704.2		-0.509488	-0.0386759	0.518881		0	0	0.518881
	0.325	10306.7	3961.58	3956.74		-1905.16	31.38	874.94		-0.523843	0.0100443	0.644689		0	0.0100443	0.644689
	0.39	10225	4217.58	4030.74		-1986.85	287.38	948.94		-0.546305	0.091986	0.699215		0	0.091986	0.699215
	0.455	10499.3	4483.68	4313.42		-1712.64	553.48	1231.62		-0.470908	0.177161	0.907505		0	0.177161	0.907505
	0.52	10974.1	4896.21	4350.32		-1237.79	966.01	1268.52		-0.340343	0.309205	0.934694		0	0.309205	0.934694
	0.585	10776.3	5094.05	4107.47		-1435.58	1163.85	1025.67		-0.394727	0.372531	0.755753		0	0.372531	0.755753
	0.65	11230	5614.95	3889.68		-981.95	1684.75	807.88		-0.269997	0.539263	0.595277		0	0.539263	0.595277
	0.715	11568.3	5921.95	3655.84		-643.64	1991.75	574.04		-0.176975	0.637529	0.422975		0	0.637529	0.422975
	0.78	12473.4	6097.95	3501.16		261.52	2167.75	419.36		0.0719076	0.693864	0.309		0.0719076	0.693864	0.309
	0.845	12594	6333.11	3623.11		382.15	2402.91	541.31		0.105076	0.769135	0.398858		0.105076	0.769135	0.398858
	0.91	12717.7	6804.21	3570.16		505.78	2874.01	488.36		0.139069	0.919928	0.359842		0.139069	0.919928	0.359842
	0.975	12428.5	6480.26	3656.84		216.63	2550.06	575.04		0.0595646	0.816236	0.423711		0.0595646	0.816236	0.423711
	1.04	12562	6616	3368.95		350.1	2685.8	287.15		0.0962636	0.859684	0.211583		0.0962636	0.859684	0.211583
	1.105	12880.2	6338.47	3554.37		668.31	2408.27	472.57		0.183759	0.770851	0.348208		0.183759	0.770851	0.348208
	1.17	13782.2	6557	3601.68		1570.31	2626.8	519.88		0.431773	0.840799	0.383067		0.431773	0.840799	0.383067
	1.235	15010	6650	3573		2798.1	2719.8	491.2		0.769366	0.870567	0.361935		0.769366	0.870567	0.361935
	1.3	15848.8	6746.21	3681.16		3636.89	2816.01	599.36		1	0.901363	0.441631		1	0.901363	0.441631
	1.365	15392	6721.95	3614.84		3180.1	2791.75	533.04		0.874401	0.893597	0.392764		0.874401	0.893597	0.392764
	1.43	14857.2	6952.11	3615.37		2645.31	3021.91	533.57		0.727355	0.967268	0.393155		0.727355	0.967268	0.393155
	1.495	14493.9	7054.37	3671.74		2281.99	3124.17	589.94		0.627456	1	0.43469		0.627456	1	0.43469
	1.56	14453.3	6860.68	3737.89		2241.42	2930.48	656.09		0.616301	0.938003	0.483432		0.616301	0.938003	0.483432
	1.625	14262.3	6754.42	3841.79		2050.42	2824.22	759.99		0.563784	0.90399	0.55999		0.563784	0.90399	0.55999
	1.69	14067	6122.37	3998.89		1855.05	2192.17	917.09		0.510065	0.701681	0.675747		0.510065	0.701681	0.675747
	1.755	13725.7	5876.47	4296.74		1513.78	1946.27	1214.94		0.416229	0.622972	0.895214		0.416229	0.622972	0.895214
	1.82	13269.8	5596.89	4436.58		1057.94	1666.69	1354.78		0.290891	0.533482	0.998254		0.290891	0.533482	0.998254
	1.885	12914.5	5253.89	4438.95		702.63	1323.69	1357.15		0.193195	0.423693	1		0.193195	0.423693	1
	1.95	13161	5061	4181		949.05	1130.8	1099.2		0.260951	0.361952	0.809933		0.260951	0.361952	0.809933
	2.015	13449.7	4782.63	4130.11		1237.84	852.43	1048.31		0.340357	0.27285	0.772435		0.340357	0.27285	0.772435
	2.08	13407.6	4811.95	3922.05		1195.68	881.75	840.25		0.328764	0.282235	0.619128		0.328764	0.282235	0.619128
	2.145	13421.5	4819.42	3929.11		1209.63	889.22	847.31		0.3326	0.284626	0.62433		0.3326	0.284626	0.62433
	2.21	13573.7	4691.21	3955.68		1361.78	761.01	873.88		0.374435	0.243588	0.643908		0.374435	0.243588	0.643908
	2.275	13457	4590.84	4145.26		1245.1	660.64	1063.46		0.342353	0.211461	0.783598		0.342353	0.211461	0.783598
	2.34	13283.2	4261.58	4087.47		1071.26	331.38	1005.67		0.294554	0.10607	0.741016		0.294554	0.10607	0.741016
	2.405	13051.3	4258.21	4142.37		839.36	328.01	1060.57		0.230791	0.104991	0.781469		0.230791	0.104991	0.781469
	2.47	13448	3855	4112		1236.1	-75.2	1030.2		0.339878	-0.0240704	0.759091		0.339878	0	0.759091
	HeLa_tetCENPBmCRMI1_STB-MG132_+Dox_BLM-RFP-BubR1-15.czi													0	0	0
	Background	10842.1	3088.6	2131.5	Maximum value	1683.18	3542.81	1751.16		1	1	1		1	1	1
	0	10756.2	4572.83	3004.75		-85.85	1484.23	873.25		-0.0510046	0.418941	0.498669		0	0.418941	0.498669
	0.065	10635.5	4732.69	3043.72		-206.62	1644.09	912.22		-0.122756	0.464064	0.520923		0	0.464064	0.520923
	0.13	10386.2	4650.22	3126.14		-455.92	1561.62	994.64		-0.270868	0.440786	0.567989		0	0.440786	0.567989
	0.195	10332.8	4939.43	3248.66		-509.27	1850.83	1117.16		-0.302564	0.522419	0.637954		0	0.522419	0.637954
	0.26	10610.2	5034.39	3362		-231.87	1945.79	1230.5		-0.137757	0.549222	0.702677		0	0.549222	0.702677
	0.325	10615.1	5146.34	3519.18		-226.98	2057.74	1387.68		-0.134852	0.580821	0.792435		0	0.580821	0.792435
	0.39	10710.9	5569.59	3616.97		-131.21	2480.99	1485.47		-0.0779536	0.700289	0.848278		0	0.700289	0.848278
	0.455	10902.5	5736.2	3525.76		60.41	2647.6	1394.26		0.0358904	0.747316	0.796192		0.0358904	0.747316	0.796192
	0.52	10939.8	5886.09	3429.83		97.68	2797.49	1298.33		0.058033	0.789625	0.741411		0.058033	0.789625	0.741411
	0.585	10876.3	6132.18	3215.65		34.24	3043.58	1084.15		0.0203424	0.859086	0.619104		0.0203424	0.859086	0.619104
	0.65	10835.3	6396.18	2979.94		-6.83	3307.58	848.44		-0.0040578	0.933604	0.484502		0	0.933604	0.484502
	0.715	11352.5	6517.39	2860.71		510.41	3428.79	729.21		0.303241	0.967817	0.416415		0.303241	0.967817	0.416415
	0.78	12001.1	6631.41	2777.37		1159.01	3542.81	645.87		0.688584	1	0.368824		0.688584	1	0.368824
	0.845	12525.3	6551.81	2934.17		1683.18	3463.21	802.67		1	0.977532	0.458365		1	0.977532	0.458365
	0.91	12270	6453.13	2871.12		1427.91	3364.53	739.62		0.848341	0.949678	0.42236		0.848341	0.949678	0.42236
	0.975	11901.8	6426.68	2846.42		1059.68	3338.08	714.92		0.62957	0.942213	0.408255		0.62957	0.942213	0.408255
	1.04	11626.2	6409.74	2955.38		784.11	3321.14	823.88		0.46585	0.937431	0.470477		0.46585	0.937431	0.470477
	1.105	11593.7	6250.06	3061.36		751.57	3161.46	929.86		0.446518	0.892359	0.530997		0.446518	0.892359	0.530997
	1.17	11343	6097.71	3121.51		500.87	3009.11	990.01		0.297574	0.849357	0.565345		0.297574	0.849357	0.565345
	1.235	11093.4	6180.69	3152.56		251.31	3092.09	1021.06		0.149307	0.872779	0.583076		0.149307	0.872779	0.583076
	1.3	11021	5934.08	3338.88		178.88	2845.48	1207.38		0.106275	0.80317	0.689474		0.106275	0.80317	0.689474
	1.365	10765.8	5676.35	3577.48		-76.26	2587.75	1445.98		-0.0453071	0.730423	0.825727		0	0.730423	0.825727
	1.43	10286.2	5462.16	3767.37		-555.9	2373.56	1635.87		-0.330268	0.669965	0.934164		0	0.669965	0.934164
	1.495	9705.05	5212.12	3835.33		-1137.05	2123.52	1703.83		-0.675537	0.599389	0.972972		0	0.599389	0.972972
	1.56	9685.31	5091.71	3882.66		-1156.79	2003.11	1751.16		-0.687265	0.565401	1		0	0.565401	1
	1.625	9758.52	4876.86	3793.39		-1083.58	1788.26	1661.89		-0.64377	0.504758	0.949022		0	0.504758	0.949022
	1.69	9912.35	4647.03	3703.71		-929.75	1558.43	1572.21		-0.552377	0.439885	0.897811		0	0.439885	0.897811
	1.755	9967.63	4422.67	3444.06		-874.47	1334.07	1312.56		-0.519534	0.376557	0.749537		0	0.376557	0.749537
	1.82	10144.5	4386.31	3361.77		-697.6	1297.71	1230.27		-0.414454	0.366294	0.702546		0	0.366294	0.702546
	1.885	10439.6	4286.02	3319.21		-402.52	1197.42	1187.71		-0.239143	0.337986	0.678242		0	0.337986	0.678242
	1.95	10922.7	4210.67	3167.37		80.64	1122.07	1035.87		0.0479093	0.316718	0.591534		0.0479093	0.316718	0.591534
	2.015	11308.8	4201.44	3048.5		466.69	1112.84	917		0.277267	0.314112	0.523653		0.277267	0.314112	0.523653
	2.08	11639.9	4149.41	3091.35		797.81	1060.81	959.85		0.47399	0.299426	0.548122		0.47399	0.299426	0.548122
	2.145	11464.6	4036.48	3066.86		622.53	947.88	935.36		0.369853	0.26755	0.534137		0.369853	0.26755	0.534137
	2.21	11162	4071.5	2980.67		319.87	982.9	849.17		0.190039	0.277435	0.484919		0.190039	0.277435	0.484919
	Background	10842.1	3088.6	2131.5	Maximum value	-1539.02	1551.3	1520.13		1	1	1		1	1	1
	0	8944.5	3474.25	2416.25		-1897.6	385.65	284.75		1.23299	0.248598	0.18732		1.23299	0.248598	0.18732
	0.065	9011.1	3430.65	2377.68		-1831	342.05	246.18		1.18972	0.220492	0.161947		1.18972	0.220492	0.161947
	0.13	9258	3432.28	2344.06		-1584.1	343.68	212.56		1.02929	0.221543	0.13983		1.02929	0.221543	0.13983
	0.195	9256.81	3491.79	2435.35		-1585.29	403.19	303.85		1.03006	0.259905	0.199884		1.03006	0.259905	0.199884
	0.26	9303.08	3486.17	2581.63		-1539.02	397.57	450.13		1	0.256282	0.296113		1	0.256282	0.296113
	0.325	8940.53	3592.26	2800.91		-1901.57	503.66	669.41		1.23557	0.32467	0.440364		1.23557	0.32467	0.440364
	0.39	8808.29	3832.55	3015.03		-2033.81	743.95	883.53		1.3215	0.479566	0.58122		1.3215	0.479566	0.58122
	0.455	8789.66	3979.84	3004.79		-2052.44	891.24	873.29		1.3336	0.574512	0.574484		1.3336	0.574512	0.574484
	0.52	8654.34	4286.1	2949.89		-2187.76	1197.5	818.39		1.42153	0.771933	0.538368		1.42153	0.771933	0.538368
	0.585	8671.49	4400.8	2684.4		-2170.61	1312.2	552.9		1.41038	0.845871	0.363719		1.41038	0.845871	0.363719
	0.65	8428.38	4428.67	2530.33		-2413.72	1340.07	398.83		1.56835	0.863837	0.262366		1.56835	0.863837	0.262366
	0.715	8325.26	4520.48	2415.09		-2516.84	1431.88	283.59		1.63535	0.923019	0.186556		1.63535	0.923019	0.186556
	0.78	8254.1	4565.87	2339.37		-2588	1477.27	207.87		1.68159	0.952279	0.136745		1.68159	0.952279	0.136745
	0.845	8212	4617.4	2346.73		-2630.1	1528.8	215.23		1.70894	0.985496	0.141587		1.70894	0.985496	0.141587
	0.91	8258.52	4529.69	2401.7		-2583.58	1441.09	270.2		1.67872	0.928956	0.177748		1.67872	0.928956	0.177748
	0.975	8479.35	4538.01	2416.92		-2362.75	1449.41	285.42		1.53523	0.93432	0.18776		1.53523	0.93432	0.18776
	1.04	8472.21	4575.5	2298.57		-2369.89	1486.9	167.07		1.53987	0.958486	0.109905		1.53987	0.958486	0.109905
	1.105	8774.56	4621.56	2289.61		-2067.54	1532.96	158.11		1.34341	0.988178	0.104011		1.34341	0.988178	0.104011
	1.17	8752.48	4609	2364.51		-2089.62	1520.4	233.01		1.35776	0.980081	0.153283		1.35776	0.980081	0.153283
	1.235	8693.5	4626.05	2445.5		-2148.6	1537.45	314		1.39608	0.991072	0.206561		1.39608	0.991072	0.206561
	1.3	8709.96	4639.9	2427.72		-2132.14	1551.3	296.22		1.38539	1	0.194865		1.38539	1	0.194865
	1.365	8665.35	4601.97	2529.83		-2176.75	1513.37	398.33		1.41437	0.97555	0.262037		1.41437	0.97555	0.262037
	1.43	8606.56	4455.81	2667.11		-2235.54	1367.21	535.61		1.45257	0.881332	0.352345		1.45257	0.881332	0.352345
	1.495	8487.31	4388.57	2838.01		-2354.79	1299.97	706.51		1.53006	0.837987	0.464769		1.53006	0.837987	0.464769
	1.56	8372.64	4344.26	3006.49		-2469.46	1255.66	874.99		1.60457	0.809424	0.575602		1.60457	0.809424	0.575602
	1.625	8155.52	4062.13	3310.55		-2686.58	973.53	1179.05		1.74564	0.627558	0.775624		1.74564	0.627558	0.775624
	1.69	8253.97	4053.83	3582.48		-2588.13	965.23	1450.98		1.68167	0.622207	0.95451		1.68167	0.622207	0.95451
	1.755	8212.66	3790.52	3650.05		-2629.44	701.92	1518.55		1.70852	0.452472	0.998961		1.70852	0.452472	0.998961
	1.82	8135.15	3804.36	3651.63		-2706.95	715.76	1520.13		1.75888	0.461394	1		1.75888	0.461394	1
	1.885	8247.37	3811.61	3390.2		-2594.73	723.01	1258.7		1.68596	0.466067	0.828021		1.68596	0.466067	0.828021
	1.95	8152.94	3740.44	2922.61		-2689.16	651.84	791.11		1.74732	0.42019	0.520423		1.74732	0.42019	0.520423
	2.015	7978.86	3669.81	2609		-2863.24	581.21	477.5		1.86043	0.37466	0.314118		1.86043	0.37466	0.314118
	2.08	7898.85	3626.54	2513.18		-2943.25	537.94	381.68		1.91242	0.346767	0.251084		1.91242	0.346767	0.251084
	2.145	7743.68	3560.43	2421.72		-3098.42	471.83	290.22		2.01324	0.304151	0.190918		2.01324	0.304151	0.190918
	2.21	7707.22	3414.36	2343.83		-3134.88	325.76	212.33		2.03693	0.209992	0.139679		2.03693	0.209992	0.139679
	Background	10842.1	3088.6	2131.5	Maximum value	1695.9	2130.19	2280.54		1	1	1		1	1	1
	0	11586.1	4012	3832.75		743.98	923.4	1701.25		0.438693	0.433482	0.745986		0.438693	0.433482	0.745986
	0.065	11575.3	3994.77	3869.77		733.23	906.17	1738.27		0.432355	0.425394	0.762219		0.432355	0.425394	0.762219
	0.13	11795.2	4149.89	3962.43		953.15	1061.29	1830.93		0.562032	0.498214	0.802849		0.562032	0.498214	0.802849
	0.195	11848.8	4150.37	4176.07		1006.71	1061.77	2044.57		0.593614	0.498439	0.896529		0.593614	0.498439	0.896529
	0.26	11928.7	4131.85	4393.01		1086.62	1043.25	2261.51		0.640734	0.489745	0.991655		0.640734	0.489745	0.991655
	0.325	12103.9	4204	4412.04		1261.83	1115.4	2280.54		0.744047	0.523615	1		0.744047	0.523615	1
	0.39	12422.5	4395.42	4270.67		1580.41	1306.82	2139.17		0.9319	0.613476	0.93801		0.9319	0.613476	0.93801
	0.455	12538	4574.54	4141.19		1695.9	1485.94	2009.69		1	0.697562	0.881234		1	0.697562	0.881234
	0.52	12340.2	4747.13	4054.69		1498.09	1658.53	1923.19		0.88336	0.778583	0.843305		0.88336	0.778583	0.843305
	0.585	11865.5	4828.24	3915.62		1023.45	1739.64	1784.12		0.603485	0.81666	0.782323		0.603485	0.81666	0.782323
	0.65	11481.5	5012.18	3757.84		639.44	1923.58	1626.34		0.377051	0.903009	0.713138		0.377051	0.903009	0.713138
	0.715	11424.9	5003.92	3596.03		582.82	1915.32	1464.53		0.343664	0.899131	0.642186		0.343664	0.899131	0.642186
	0.78	11376.4	5007.43	3472.86		534.32	1918.83	1341.36		0.315066	0.900779	0.588176		0.315066	0.900779	0.588176
	0.845	11641.7	4893.32	3699.89		799.59	1804.72	1568.39		0.471484	0.847211	0.687727		0.471484	0.847211	0.687727
	0.91	11571.6	4911.56	3620.51		729.49	1822.96	1489.01		0.430149	0.855773	0.65292		0.430149	0.855773	0.65292
	0.975	11693.6	4919.79	3588.39		851.47	1831.19	1456.89		0.502076	0.859637	0.638836		0.502076	0.859637	0.638836
	1.04	11887.9	4946.99	3603.42		1045.76	1858.39	1471.92		0.61664	0.872406	0.645426		0.61664	0.872406	0.645426
	1.105	12067.8	4917.27	3450.29		1225.73	1828.67	1318.79		0.722761	0.858454	0.57828		0.722761	0.858454	0.57828
	1.17	12018.9	5015.73	3580.42		1176.8	1927.13	1448.92		0.693909	0.904675	0.635341		0.693909	0.904675	0.635341
	1.235	11882.5	5057.24	3585.58		1040.44	1968.64	1454.08		0.613503	0.924162	0.637603		0.613503	0.924162	0.637603
	1.3	11876.9	5218.79	3494.99		1034.8	2130.19	1363.49		0.610177	1	0.59788		0.610177	1	0.59788
	1.365	11829.2	4976.97	3779.02		987.09	1888.37	1647.52		0.582045	0.88648	0.722425		0.582045	0.88648	0.722425
	1.43	11945.4	4922.42	3911.86		1103.34	1833.82	1780.36		0.650593	0.860872	0.780675		0.650593	0.860872	0.780675
	1.495	12054.4	4838.83	3957.92		1212.29	1750.23	1826.42		0.714836	0.821631	0.800872		0.714836	0.821631	0.800872
	1.56	11891.1	4681.49	4164.07		1049.05	1592.89	2032.57		0.61858	0.747769	0.891267		0.61858	0.747769	0.891267
	1.625	11680.7	4541.99	4074.36		838.64	1453.39	1942.86		0.49451	0.682282	0.85193		0.49451	0.682282	0.85193
	1.69	11414.4	4415.67	3947.08		572.33	1327.07	1815.58		0.337479	0.622982	0.796118		0.337479	0.622982	0.796118
	1.755	11047	4358.86	3897.61		204.95	1270.26	1766.11		0.12085	0.596313	0.774426		0.12085	0.596313	0.774426
	1.82	10499.4	4194.47	3528.95		-342.67	1105.87	1397.45		-0.202058	0.519141	0.612772		0	0.519141	0.612772
	1.885	10479.2	4178.24	3225.89		-362.94	1089.64	1094.39		-0.21401	0.511522	0.479882		0	0.511522	0.479882
	1.95	10689	4022.38	3055.8		-153.1	933.78	924.3		-0.0902765	0.438355	0.405299		0	0.438355	0.405299
	2.015	10402.6	4226.77	3092.71		-439.51	1138.17	961.21		-0.25916	0.534304	0.421484		0	0.534304	0.421484
	2.08	10462.3	4228.2	3030.93		-379.78	1139.6	899.43		-0.22394	0.534976	0.394393		0	0.534976	0.394393
	2.145	10372.4	4223.08	2977		-469.68	1134.48	845.5		-0.27695	0.532572	0.370746		0	0.532572	0.370746
	HeLa_tetCENPBmCRMI1_STB-MG132_+Dox_BLM-RFP-BubR1-21.czi													0	0	0
	Background	11156.2	4253.8	3065.01	Maximum value	307.2	3225.33	1424.55		1	1	1		1	1	1
	0	10452.2	6087.5	3609		-703.95	1833.7	543.99		-2.2915	0.568531	0.381868		0	0.568531	0.381868
	0.065	10445.6	6202.22	3510.51		-710.61	1948.42	445.5		-2.31318	0.604099	0.31273		0	0.604099	0.31273
	0.13	10546.4	6386.14	3510.35		-609.84	2132.34	445.34		-1.98516	0.661123	0.312618		0	0.661123	0.312618
	0.195	10736	6560.81	3754.72		-420.15	2307.01	689.71		-1.36768	0.715279	0.48416		0	0.715279	0.48416
	0.26	10642.8	6542	3824.99		-513.38	2288.2	759.98		-1.67116	0.709447	0.533488		0	0.709447	0.533488
	0.325	10692.2	6876.58	4087.76		-463.98	2622.78	1022.75		-1.51035	0.813182	0.717946		0	0.813182	0.717946
	0.39	10883.4	6929.96	4342.68		-272.84	2676.16	1277.67		-0.888151	0.829732	0.896894		0	0.829732	0.896894
	0.455	10914.2	7161.09	4453.6		-242.04	2907.29	1388.59		-0.787891	0.901393	0.974757		0	0.901393	0.974757
	0.52	10848.9	7342.47	4489.56		-307.28	3088.67	1424.55		-1.00026	0.957629	1		0	0.957629	1
	0.585	10993.7	7362.48	4459.05		-162.52	3108.68	1394.04		-0.529036	0.963833	0.978583		0	0.963833	0.978583
	0.65	11031.2	7332.2	4278.62		-124.99	3078.4	1213.61		-0.406868	0.954445	0.851925		0	0.954445	0.851925
	0.715	10988	7234.5	4108.06		-168.2	2980.7	1043.05		-0.547526	0.924153	0.732196		0	0.924153	0.732196
	0.78	10728.2	7370.42	3910		-427.95	3116.62	844.99		-1.39307	0.966295	0.593163		0	0.966295	0.593163
	0.845	10880.1	7347.03	3725.01		-276.12	3093.23	660		-0.898828	0.959043	0.463304		0	0.959043	0.463304
	0.91	10718	7389.6	3681.18		-438.15	3135.8	616.17		-1.42627	0.972242	0.432537		0	0.972242	0.432537
	0.975	11076.4	7479.13	3600.91		-79.85	3225.33	535.9		-0.259928	1	0.376189		0	1	0.376189
	1.04	11178.2	7286.17	3627.65		22.01	3032.37	562.64		0.0716471	0.940174	0.39496		0.0716471	0.940174	0.39496
	1.105	11031.6	7267.87	3603.67		-124.64	3014.07	538.66		-0.405729	0.9345	0.378126		0	0.9345	0.378126
	1.17	10990	7309.52	3690.23		-166.18	3055.72	625.22		-0.540951	0.947413	0.438889		0	0.947413	0.438889
	1.235	11034.1	7210.37	3727.64		-122.05	2956.57	662.63		-0.397298	0.916672	0.46515		0	0.916672	0.46515
	1.3	11160.8	7142.03	3736.07		4.6	2888.23	671.06		0.014974	0.895484	0.471068		0.014974	0.895484	0.471068
	1.365	11182	7055.05	3922.68		25.81	2801.25	857.67		0.0840169	0.868516	0.602064		0.0840169	0.868516	0.602064
	1.43	11290.5	6824.89	4011.14		134.3	2571.09	946.13		0.437174	0.797156	0.664161		0.437174	0.797156	0.664161
	1.495	10932.6	6595.46	4105.09		-223.62	2341.66	1040.08		-0.72793	0.726022	0.730111		0	0.726022	0.730111
	1.56	11102.7	6390.52	4278.77		-53.53	2136.72	1213.76		-0.174251	0.662481	0.85203		0	0.662481	0.85203
	1.625	11044.3	6311.5	4138.56		-111.94	2057.7	1073.55		-0.364388	0.637981	0.753606		0	0.637981	0.753606
	1.69	11204.6	6243.8	4033.36		48.41	1990	968.35		0.157585	0.616991	0.679759		0.157585	0.616991	0.679759
	1.755	11442.1	6111.34	3848.56		285.89	1857.54	783.55		0.930632	0.575922	0.550033		0.930632	0.575922	0.550033
	1.82	11457.5	6007.13	3658.59		301.32	1753.33	593.58		0.980859	0.543613	0.416679		0.980859	0.543613	0.416679
	1.885	11463.4	6042.09	3480		307.2	1788.29	414.99		1	0.554452	0.291313		1	0.554452	0.291313
	1.95	11246.1	6079.39	3396.94		89.94	1825.59	331.93		0.292773	0.566017	0.233007		0.292773	0.566017	0.233007
	2.015	10950.2	5980.53	3356.77		-205.96	1726.73	291.76		-0.670443	0.535365	0.204809		0	0.535365	0.204809
	2.08	10643.2	5934.3	3065.01		-513.01	1680.5	0		-1.66995	0.521032	0		0	0.521032	0
	2.145	10281	5875.5	3206		-875.2	1621.7	140.99		-2.84896	0.502801	0.0989716		0	0.502801	0.0989716
	Background	11156.2	4253.8	3065.01	Maximum value	1445.3	3227.95	1116		1	1	1		1	1	1
	0	11993	5577.75	3589.5		836.8	1323.95	503		0.57898	0.410152	0.450717		0.57898	0.410152	0.450717
	0.065	11866.2	5497.67	3696.17		709.97	1243.87	609.67		0.491227	0.385344	0.546299		0.491227	0.385344	0.546299
	0.13	11502.3	5558.17	3839		346.13	1304.37	752.5		0.239487	0.404086	0.674283		0.239487	0.404086	0.674283
	0.195	11278.5	5632	4001.5		122.3	1378.2	915		0.0846191	0.426958	0.819892		0.0846191	0.426958	0.819892
	0.26	11102	5816.67	4164.75		-54.2	1562.87	1078.25		-0.0375009	0.484168	0.966174		0	0.484168	0.966174
	0.325	10953.8	5980.67	4202.5		-202.37	1726.87	1116		-0.140019	0.534974	1		0	0.534974	1
	0.39	10891.2	6105	4101		-264.95	1851.2	1014.5		-0.183318	0.573491	0.90905		0	0.573491	0.90905
	0.455	10906.3	6341	3959.83		-249.87	2087.2	873.33		-0.172885	0.646602	0.782554		0	0.646602	0.782554
	0.52	10896.8	6536.75	3804.58		-259.45	2282.95	718.08		-0.179513	0.707245	0.643441		0	0.707245	0.643441
	0.585	10808	6763	3703		-348.2	2509.2	616.5		-0.240919	0.777335	0.552419		0	0.777335	0.552419
	0.65	11068	6949.58	3668.92		-88.2	2695.78	582.42		-0.0610254	0.835137	0.521882		0	0.835137	0.521882
	0.715	11318	7023.83	3616.83		161.8	2770.03	530.33		0.111949	0.858139	0.475206		0.111949	0.858139	0.475206
	0.78	11407.5	7067	3525		251.3	2813.2	438.5		0.173874	0.871513	0.392921		0.173874	0.871513	0.392921
	0.845	11319.2	7140.33	3541.5		162.97	2886.53	455		0.112759	0.89423	0.407706		0.112759	0.89423	0.407706
	0.91	11422.4	6936.42	3533.92		266.22	2682.62	447.42		0.184197	0.83106	0.400914		0.184197	0.83106	0.400914
	0.975	11464	6742.5	3435		307.8	2488.7	348.5		0.212966	0.770985	0.312276		0.212966	0.770985	0.312276
	1.04	11284.8	6818.58	3482.25		128.63	2564.78	395.75		0.0889988	0.794554	0.354615		0.0889988	0.794554	0.354615
	1.105	11301.3	6888.17	3496.5		145.13	2634.37	410		0.100415	0.816112	0.367384		0.100415	0.816112	0.367384
	1.17	11330	6906.75	3318.25		173.8	2652.95	231.75		0.120252	0.821868	0.207661		0.120252	0.821868	0.207661
	1.235	11481.2	7091.67	3199.33		324.97	2837.87	112.83		0.224846	0.879156	0.101102		0.224846	0.879156	0.101102
	1.3	11992.2	7203.92	3165.92		835.97	2950.12	79.42		0.578406	0.91393	0.0711649		0.578406	0.91393	0.0711649
	1.365	12601.5	7170.5	3204.5		1445.3	2916.7	118		1	0.903577	0.105735		1	0.903577	0.105735
	1.43	12496.3	7324.83	3238.58		1340.13	3071.03	152.08		0.927233	0.951387	0.136272		0.927233	0.951387	0.136272
	1.495	12297.7	7415.33	3249.17		1141.47	3161.53	162.67		0.789781	0.979423	0.145762		0.789781	0.979423	0.145762
	1.56	12034.5	7481.75	3359.75		878.3	3227.95	273.25		0.607694	1	0.244848		0.607694	1	0.244848
	1.625	11997.8	7460.5	3406.17		841.63	3206.7	319.67		0.582322	0.993417	0.286443		0.582322	0.993417	0.286443
	1.69	12358.1	7253.58	3427.08		1201.88	2999.78	340.58		0.831578	0.929314	0.305179		0.831578	0.929314	0.305179
	1.755	12522.5	6946.5	3485.5		1366.3	2692.7	399		0.94534	0.834183	0.357527		0.94534	0.834183	0.357527
	1.82	12396.6	6678	3695.58		1240.38	2424.2	609.08		0.858216	0.751003	0.545771		0.858216	0.751003	0.545771
	1.885	12069.2	6447.17	3922		912.97	2193.37	835.5		0.631682	0.679493	0.748656		0.631682	0.679493	0.748656
	1.95	11623	6140.25	3940		466.8	1886.45	853.5		0.322978	0.584411	0.764785		0.322978	0.584411	0.764785
	2.015	11155.2	5938.17	3867.67		-1.03	1684.37	781.17		-0.000712655	0.521808	0.699973		0	0.521808	0.699973
	2.08	10574	5732.83	3679.33		-582.2	1479.03	592.83		-0.402823	0.458195	0.53121		0	0.458195	0.53121
	2.145	10155.5	5478.5	3435		-1000.7	1224.7	348.5		-0.692382	0.379405	0.312276		0	0.379405	0.312276
	2.21	10022.3	5382.33	3265.42		-1133.87	1128.53	178.92		-0.784522	0.349612	0.160323		0	0.349612	0.160323
	2.275	9869	5309.5	3134.83		-1287.2	1055.7	48.33		-0.890611	0.32705	0.0433065		0	0.32705	0.0433065
	2.34	9791.25	5317.75	3086.5		-1364.95	1063.95	0		-0.944406	0.329605	0		0	0.329605	0
	Background	11156.2	4253.8	3065.01	Maximum value	1599.8	2321.84	1181.76		1	1	1		1	1	1
	0	10678	5780	3954		-478.2	1526.2	118.94		-0.298912	0.657324	0.100646		0	0.657324	0.100646
	0.065	10886.6	5927.49	3835.06		-269.61	1673.69	0		-0.168527	0.720846	0		0	0.720846	0
	0.13	11159.4	5847.91	3962.77		3.23	1594.11	127.71		0.002019	0.686572	0.108068		0.002019	0.686572	0.108068
	0.195	11254.5	5896.3	4024.07		98.26	1642.5	189.01		0.0614202	0.707413	0.159939		0.0614202	0.707413	0.159939
	0.26	11199.6	6011.52	4261.14		43.41	1757.72	426.08		0.0271346	0.757038	0.360547		0.0271346	0.757038	0.360547
	0.325	11373.5	6036.1	4389.76		217.3	1782.3	554.7		0.135829	0.767624	0.469385		0.135829	0.767624	0.469385
	0.39	11260.4	6118.67	4544.28		104.2	1864.87	709.22		0.0651331	0.803186	0.600139		0.0651331	0.803186	0.600139
	0.455	11094.3	6189.32	4675.06		-61.93	1935.52	840		-0.0387111	0.833615	0.710804		0	0.833615	0.710804
	0.52	11330.8	6377.76	4664.69		174.62	2123.96	829.63		0.109151	0.914774	0.702029		0.109151	0.914774	0.702029
	0.585	11596.1	6527.98	4601.69		439.89	2274.18	766.63		0.274966	0.979473	0.648719		0.274966	0.979473	0.648719
	0.65	11576.5	6505.87	4494.64		420.25	2252.07	659.58		0.262689	0.969951	0.558134		0.262689	0.969951	0.558134
	0.715	11627.7	6492.32	4344.8		471.54	2238.52	509.74		0.294749	0.964115	0.43134		0.294749	0.964115	0.43134
	0.78	11592.5	6548.18	4175.87		436.27	2294.38	340.81		0.272703	0.988173	0.288392		0.272703	0.988173	0.288392
	0.845	11503.7	6535.02	4070.64		347.52	2281.22	235.58		0.217227	0.982505	0.199347		0.217227	0.982505	0.199347
	0.91	11610.4	6431.78	4035.09		454.15	2177.98	200.03		0.283879	0.938041	0.169264		0.283879	0.938041	0.169264
	0.975	11844.8	6502.95	4146.9		688.63	2249.15	311.84		0.430448	0.968693	0.263878		0.430448	0.968693	0.263878
	1.04	11950.2	6334.01	4039.51		794.03	2080.21	204.45		0.496331	0.895932	0.173005		0.496331	0.895932	0.173005
	1.105	12280.1	6388.56	4198.56		1123.86	2134.76	363.5		0.7025	0.919426	0.307592		0.7025	0.919426	0.307592
	1.17	12423.6	6422.67	4095.32		1267.41	2168.87	260.26		0.79223	0.934117	0.220231		0.79223	0.934117	0.220231
	1.235	12377.3	6294.06	4071.62		1221.06	2040.26	236.56		0.763258	0.878725	0.200176		0.763258	0.878725	0.200176
	1.3	12094	6425.67	4047.19		937.84	2171.87	212.13		0.586223	0.935409	0.179503		0.586223	0.935409	0.179503
	1.365	11806	6575.64	4196.05		649.85	2321.84	360.99		0.406207	1	0.305468		0.406207	1	0.305468
	1.43	11689.2	6371.63	4302.16		533.01	2117.83	467.1		0.333173	0.912134	0.395258		0.333173	0.912134	0.395258
	1.495	12090.4	6335.57	4633.8		934.24	2081.77	798.74		0.583973	0.896604	0.67589		0.583973	0.896604	0.67589
	1.56	12635.2	6362.19	5000.93		1479.02	2108.39	1165.87		0.924503	0.908069	0.986554		0.924503	0.908069	0.986554
	1.625	12240.5	6019.06	4959.09		1084.25	1765.26	1124.03		0.677741	0.760285	0.951149		0.677741	0.760285	0.951149
	1.69	12168.8	5817.28	5016.82		1012.58	1563.48	1181.76		0.632942	0.67338	1		0.632942	0.67338	1
	1.755	12002.1	5593.61	4917.74		845.95	1339.81	1082.68		0.528785	0.577047	0.916159		0.528785	0.577047	0.916159
	1.82	11718.3	5569.73	4825.57		562.12	1315.93	990.51		0.351369	0.566762	0.838165		0.351369	0.566762	0.838165
	1.885	11952.7	5606.33	4827.05		796.5	1352.53	991.99		0.497875	0.582525	0.839417		0.497875	0.582525	0.839417
	1.95	12050.7	5444.74	4557.63		894.47	1190.94	722.57		0.559114	0.512929	0.611435		0.559114	0.512929	0.611435
	2.015	11998.4	5487.92	4519.79		842.21	1234.12	684.73		0.526447	0.531527	0.579415		0.526447	0.531527	0.579415
	2.08	12089.5	5467.62	4569.39		933.3	1213.82	734.33		0.583385	0.522784	0.621387		0.583385	0.522784	0.621387
	2.145	12483.9	5420.93	4478.58		1327.69	1167.13	643.52		0.82991	0.502675	0.544544		0.82991	0.502675	0.544544
	2.21	12756	5399.25	4482.25		1599.8	1145.45	647.19		1	0.493337	0.547649		1	0.493337	0.547649
	Background	11156.2	4253.8	3065.01	Maximum value	601.44	3956.7	963.7		1	1	1		1	1	0.990245
	0	10286	6118	3229		-870.2	1864.2	247.406		-1.44686	0.47115	0.256725		0	0.47115	0.856353
	0.065	10138.3	5898.61	3245.59		-1017.88	1644.81	263.991		-1.6924	0.415702	0.273935		0	0.415702	0.912311
	0.13	9980.79	5800.66	3355.97		-1175.41	1546.86	374.377		-1.95433	0.390947	0.388479		0	0.390947	0.808799
	0.195	9775.01	6107.14	3569.49		-1381.19	1853.34	587.895		-2.29647	0.468405	0.610039		0	0.468405	0.898475
	0.26	9713.01	6281.12	3582.96		-1443.19	2027.32	601.367		-2.39956	0.512376	0.624019		0	0.512376	0.801102
	0.325	10005.6	6432.03	3853.16		-1150.62	2178.23	871.571		-1.91311	0.550517	0.904401		0	0.550517	0.634091
	0.39	10135	6615.56	3865.05		-1021.25	2361.76	883.451		-1.69801	0.596901	0.916728		0	0.596901	1
	0.455	9998.62	6863.86	3945.29		-1157.58	2610.06	963.7		-1.92468	0.659656	1		0	0.659656	0.479119
	0.52	10243.4	7303.19	3836.78		-912.79	3049.39	855.187		-1.51767	0.77069	0.8874		0	0.77069	0.372779
	0.585	10338	7700.24	3594.04		-818.24	3446.44	612.448		-1.36047	0.871039	0.635517		0	0.871039	0.491878
	0.65	10562.2	7977.12	3352.22		-593.95	3723.32	370.623		-0.987547	0.941017	0.384583		0	0.941017	0.490283
	0.715	10877.6	8054.41	3204.86		-278.6	3800.61	223.261		-0.463222	0.96055	0.231671		0	0.96055	0.512427
	0.78	11120.6	8015.12	2981.59		-35.6	3761.32	0		-0.0591913	0.95062	0		0	0.95062	0.568452
	0.845	11343	8077.49	2983.94		186.84	3823.69	2.343		0.310654	0.966384	0.00243125		0.310654	0.966384	0.695933
	0.91	11523.9	7936.22	3118.44		367.67	3682.42	136.844		0.611316	0.93068	0.141999		0.611316	0.93068	0.732731
	0.975	11495.6	8052.13	3085.91		339.36	3798.33	104.319		0.564246	0.959974	0.108248		0.564246	0.959974	0.428554
	1.04	11223.6	8210.5	3127.38		67.42	3956.7	145.781		0.112098	1	0.151272		0.112098	1	0.722884
	1.105	11170.8	8198.48	3169.74		14.56	3944.68	188.146		0.0242086	0.996962	0.195233		0.0242086	0.996962	0.671517
	1.17	11339.2	8017.93	3273.61		183.03	3764.13	292.019		0.30432	0.951331	0.303019		0.30432	0.951331	0.827944
	1.235	11071.2	8119.44	3296.8		-84.97	3865.64	315.206		-0.141278	0.976986	0.327079		0	0.976986	0.82248
	1.3	10883.5	8168.89	3347.83		-272.75	3915.09	366.234		-0.453495	0.989484	0.380029		0	0.989484	0.880261
	1.365	10535.8	8176	3266.19		-620.41	3922.2	284.595		-1.03154	0.991281	0.295315		0	0.991281	0.776421
	1.43	10271.9	7899.17	3262.07		-884.28	3645.37	280.476		-1.47027	0.921316	0.291041		0	0.921316	0.667893
	1.495	10421.4	7519.81	3347.37		-734.77	3266.01	365.776		-1.22168	0.825438	0.379554		0	0.825438	0.664942
	1.56	10793.9	7256.81	3480.75		-362.26	3003.01	499.156		-0.602321	0.758968	0.517958		0	0.758968	0.632338
	1.625	10803.6	6916.16	3570.82		-352.56	2662.36	589.224		-0.586193	0.672874	0.611418		0	0.672874	0.635837
	1.69	10907.2	6485.65	3747.03		-248.98	2231.85	765.441		-0.413973	0.564069	0.794273		0	0.564069	0.603037
	1.755	10893.8	6097.7	3715.51		-262.38	1843.9	733.916		-0.436253	0.46602	0.761561		0	0.46602	0.52941
	1.82	11145.2	5875.9	3812.1		-10.96	1622.1	830.508		-0.0182229	0.409963	0.861791		0	0.409963	0.506333
	1.885	11595.7	5818.32	3759.27		439.47	1564.52	777.677		0.730696	0.39541	0.80697		0.730696	0.39541	0.478916
	1.95	11757.6	5674.36	3551.05		601.44	1420.56	569.451		1	0.359026	0.590901		1	0.359026	0.528751
	2.015	11630.5	5653.85	3440.52		474.26	1400.05	458.926		0.788541	0.353843	0.476213		0.788541	0.353843	0.496127
	2.08	11487.5	5494	3375.5		331.3	1240.2	393.906		0.550845	0.313443	0.408743		0.550845	0.313443	0.473733
	HeLa_tetCENPBmCRMI1_STB-MG132_+Dox_BLM-RFP-BubR1-23.czi													0	0	0
	Background	8752	2529.3	2481	Maximum value	624	2173.26	851.812		1	1	1		1	1	1
	0	9007	3428	2856		255	898.7	375		0.408654	0.413526	0.440238		0.408654	0.413526	0.440238
	0.065	8989	3483.94	2868.62		237	954.64	387.625		0.379808	0.439266	0.455059		0.379808	0.439266	0.455059
	0.13	8850.62	3563.12	3076.88		98.62	1033.82	595.875		0.158045	0.4757	0.699538		0.158045	0.4757	0.699538
	0.195	8939.06	3535.12	2982.38		187.06	1005.82	501.375		0.299776	0.462816	0.588598		0.299776	0.462816	0.588598
	0.26	8880.5	3604.5	3052.5		128.5	1075.2	571.5		0.205929	0.494741	0.670923		0.205929	0.494741	0.670923
	0.325	8851.94	3853.06	3332.81		99.94	1323.76	851.812		0.16016	0.609113	1		0.16016	0.609113	1
	0.39	8841.62	3918.38	3229		89.62	1389.08	748		0.143622	0.639169	0.878128		0.143622	0.639169	0.878128
	0.455	8553.19	4126.19	3264.06		-198.81	1596.89	783.062		-0.318606	0.73479	0.91929		0	0.73479	0.91929
	0.52	8487.5	4412	3072		-264.5	1882.7	591		-0.423878	0.866302	0.693815		0	0.866302	0.693815
	0.585	8600.75	4434.06	2843.44		-151.25	1904.76	362.438		-0.242388	0.876453	0.425491		0	0.876453	0.425491
	0.65	9033.25	4650	2891.88		281.25	2120.7	410.875		0.450721	0.975815	0.482354		0.450721	0.975815	0.482354
	0.715	8882.5	4702.56	2723.88		130.5	2173.26	242.875		0.209135	1	0.285127		0.209135	1	0.285127
	0.78	8516	4503	2614.75		-236	1973.7	133.75		-0.378205	0.908175	0.157018		0	0.908175	0.157018
	0.845	8264.19	4507.56	2573.81		-487.81	1978.26	92.812		-0.781747	0.910273	0.108958		0	0.910273	0.108958
	0.91	8565.88	4474.5	2622.88		-186.12	1945.2	141.875		-0.298269	0.895061	0.166557		0	0.895061	0.166557
	0.975	9376	4492.25	2588.75		624	1962.95	107.75		1	0.903228	0.126495		1	0.903228	0.126495
	1.04	9190	4312	2592		438	1782.7	111		0.701923	0.820288	0.13031		0.701923	0.820288	0.13031
	1.105	9220.12	4269.38	2693.31		468.12	1740.08	212.312		0.750192	0.800677	0.249247		0.750192	0.800677	0.249247
	1.17	8964.5	4427.12	2739.12		212.5	1897.82	258.125		0.340545	0.87326	0.30303		0.340545	0.87326	0.30303
	1.235	8556.94	4305	2778.31		-195.06	1775.7	297.312		-0.312596	0.817067	0.349035		0	0.817067	0.349035
	1.3	8438	4202	2872.75		-314	1672.7	391.75		-0.503205	0.769673	0.459902		0	0.769673	0.459902
	1.365	8164.75	4158.25	2833.25		-587.25	1628.95	352.25		-0.941106	0.749542	0.41353		0	0.749542	0.41353
	1.43	7989.75	4274.12	2922.38		-762.25	1744.82	441.375		-1.22155	0.802858	0.51816		0	0.802858	0.51816
	1.495	7759.06	4042.5	3067.31		-992.94	1513.2	586.312		-1.59125	0.696281	0.688312		0	0.696281	0.688312
	1.56	7628.5	3850.5	3081.5		-1123.5	1321.2	600.5		-1.80048	0.607935	0.704968		0	0.607935	0.704968
	1.625	7573.31	3751.69	3144.62		-1178.69	1222.39	663.625		-1.88893	0.562468	0.779074		0	0.562468	0.779074
	1.69	7301.25	3437.5	3148		-1450.75	908.2	667		-2.32492	0.417898	0.783037		0	0.417898	0.783037
	1.755	7074.19	3543.81	3325.69		-1677.81	1014.51	844.688		-2.6888	0.466815	0.991637		0	0.466815	0.991637
	1.82	7082	3338.25	3142.25		-1670	808.95	661.25		-2.67628	0.372229	0.776286		0	0.372229	0.776286
	1.885	7051.31	3199.44	2994.44		-1700.69	670.14	513.438		-2.72546	0.308357	0.60276		0	0.308357	0.60276
	1.95	7057.88	3107.12	2813		-1694.12	577.82	332		-2.71494	0.265877	0.389757		0	0.265877	0.389757
	2.015	7138.88	3071.5	2729.38		-1613.12	542.2	248.375		-2.58513	0.249487	0.291584		0	0.249487	0.291584
	2.08	7303	3122	2481		-1449	592.7	0		-2.32212	0.272724	0		0	0.272724	0
	Background	8752	2529.3	2481	Maximum value	960.54	2144.62	1075.22		1	1	1		1	1	1
	0	8567	3368	3111		-185	838.7	407.63		-0.1926	0.391072	0.379113		0	0.391072	0.379113
	0.065	8511.52	3571.35	3104.36		-240.48	1042.05	400.99		-0.250359	0.48589	0.372938		0	0.48589	0.372938
	0.13	8545.09	3663.89	3117.87		-206.91	1134.59	414.5		-0.21541	0.52904	0.385503		0	0.52904	0.385503
	0.195	8351.96	3581.5	3111.01		-400.04	1052.2	407.64		-0.416474	0.490623	0.379122		0	0.490623	0.379122
	0.26	8308.64	3675.27	2984.44		-443.36	1145.97	281.07		-0.461574	0.534346	0.261407		0	0.534346	0.261407
	0.325	8680.66	3910.17	3111.08		-71.34	1380.87	407.71		-0.0742707	0.643876	0.379188		0	0.643876	0.379188
	0.39	8740.88	3952.47	3281.45		-11.12	1423.17	578.08		-0.0115768	0.6636	0.537639		0	0.6636	0.537639
	0.455	8786	3974.33	3410.68		34	1445.03	707.31		0.0353968	0.673793	0.657828		0.0353968	0.673793	0.657828
	0.52	8894.89	4214.35	3467.77		142.89	1685.05	764.4		0.14876	0.78571	0.710924		0.14876	0.78571	0.710924
	0.585	9219.81	4264.15	3433.95		467.81	1734.85	730.58		0.487028	0.808931	0.67947		0.487028	0.808931	0.67947
	0.65	9567.21	4421.89	3422.58		815.21	1892.59	719.21		0.8487	0.882483	0.668896		0.8487	0.882483	0.668896
	0.715	9681.35	4541.45	3278.39		929.35	2012.15	575.02		0.967529	0.938231	0.534793		0.967529	0.938231	0.534793
	0.78	9705.08	4552.47	3222.49		953.08	2023.17	519.12		0.992234	0.94337	0.482804		0.992234	0.94337	0.482804
	0.845	9614.96	4572.79	3136.85		862.96	2043.49	433.48		0.898411	0.952845	0.403155		0.898411	0.952845	0.403155
	0.91	9505.39	4623.6	2957.76		753.39	2094.3	254.39		0.78434	0.976537	0.236593		0.78434	0.976537	0.236593
	0.975	9480	4603.69	2941.43		728	2074.39	238.06		0.757907	0.967253	0.221406		0.757907	0.967253	0.221406
	1.04	9610.16	4659.84	2892.5		858.16	2130.54	189.13		0.893414	0.993435	0.175899		0.893414	0.993435	0.175899
	1.105	9496.54	4444.77	2703.37		744.54	1915.47	0		0.775126	0.893151	0		0.775126	0.893151	0
	1.17	9316.03	4673.92	2788.69		564.03	2144.62	85.32		0.587201	1	0.0793512		0.587201	1	0.0793512
	1.235	9226.99	4496.38	2862.13		474.99	1967.08	158.76		0.494503	0.917216	0.147654		0.494503	0.917216	0.147654
	1.3	8861.23	4442.96	2978.77		109.23	1913.66	275.4		0.113717	0.892307	0.256134		0.113717	0.892307	0.256134
	1.365	9193.21	4344.47	2984.65		441.21	1815.17	281.28		0.459335	0.846383	0.261602		0.459335	0.846383	0.261602
	1.43	9432.26	4440.81	3109.39		680.26	1911.51	406.02		0.708206	0.891305	0.377616		0.708206	0.891305	0.377616
	1.495	9585.26	4292.53	3143.54		833.26	1763.23	440.17		0.867491	0.822164	0.409377		0.867491	0.822164	0.409377
	1.56	9504.41	3989.88	3214.03		752.41	1460.58	510.66		0.78332	0.681044	0.474935		0.78332	0.681044	0.474935
	1.625	9307.52	3967.15	3271.69		555.52	1437.85	568.32		0.578341	0.670445	0.528562		0.578341	0.670445	0.528562
	1.69	9240.58	3866.17	3475.86		488.58	1336.87	772.49		0.508651	0.62336	0.718448		0.508651	0.62336	0.718448
	1.755	9188.02	3729.39	3623.54		436.02	1200.09	920.17		0.453932	0.559582	0.855797		0.453932	0.559582	0.855797
	1.82	9256.03	3546.04	3735.34		504.03	1016.74	1031.97		0.524736	0.474089	0.959776		0.524736	0.474089	0.959776
	1.885	9286.36	3366.14	3778.59		534.36	836.84	1075.22		0.556312	0.390204	1		0.556312	0.390204	1
	1.95	9183.28	3285.6	3670.85		431.28	756.3	967.48		0.448997	0.35265	0.899797		0.448997	0.35265	0.899797
	2.015	9247.21	3191.45	3646.53		495.21	662.15	943.16		0.515554	0.308749	0.877179		0.515554	0.308749	0.877179
	2.08	9428.63	3029.12	3613.74		676.63	499.82	910.37		0.704427	0.233058	0.846683		0.704427	0.233058	0.846683
	2.145	9512.79	3000.09	3438.37		760.79	470.79	735		0.792044	0.219521	0.683581		0.792044	0.219521	0.683581
	2.21	9521.15	2847.27	3466.97		769.15	317.97	763.6		0.800747	0.148264	0.71018		0.800747	0.148264	0.71018
	2.275	9458	2937.34	3329.44		706	408.04	626.07		0.735003	0.190262	0.582272		0.735003	0.190262	0.582272
	2.34	9712.54	2974.84	3207.7		960.54	445.54	504.33		1	0.207748	0.469048		1	0.207748	0.469048
	2.405	9608	2801	3410		856	271.7	706.63		0.891165	0.126689	0.657196		0.891165	0.126689	0.657196
	Background	8752	2529.3	2481	Maximum value	854	2073.15	1069.28		1	1	1		1	1	1
	0	6842	3306	2449		-1910	776.7	0		-2.23653	0.374647	0		0	0.374647	0
	0.065	7033.24	3337.11	2570.96		-1718.76	807.81	121.958		-2.0126	0.389653	0.114056		0	0.389653	0.114056
	0.13	7302.95	3446.25	2572.58		-1449.05	916.95	123.582		-1.69678	0.442298	0.115575		0	0.442298	0.115575
	0.195	7235.35	3466.02	2786.59		-1516.65	936.72	337.592		-1.77594	0.451834	0.315718		0	0.451834	0.315718
	0.26	7369.39	3593.14	3072.09		-1382.61	1063.84	623.094		-1.61898	0.513151	0.582722		0	0.513151	0.582722
	0.325	7424.43	3851.12	3313.86		-1327.57	1321.82	864.857		-1.55453	0.63759	0.80882		0	0.63759	0.80882
	0.39	7391.7	3684.55	3458.58		-1360.3	1155.25	1009.58		-1.59286	0.557244	0.944166		0	0.557244	0.944166
	0.455	7510.04	3904.84	3442.28		-1241.96	1375.54	993.28		-1.45429	0.663502	0.928922		0	0.663502	0.928922
	0.52	7774.82	3942.14	3518.28		-977.18	1412.84	1069.28		-1.14424	0.681494	1		0	0.681494	1
	0.585	7757.39	4110.17	3400.57		-994.61	1580.87	951.575		-1.16465	0.762545	0.88992		0	0.762545	0.88992
	0.65	8121.2	4267.75	3208.86		-630.8	1738.45	759.857		-0.738642	0.838555	0.710624		0	0.838555	0.710624
	0.715	8706.55	4311.07	3091.86		-45.45	1781.77	642.86		-0.0532201	0.859451	0.601207		0	0.859451	0.601207
	0.78	8923.54	4292.09	2966.59		171.54	1762.79	517.591		0.200867	0.850295	0.484055		0.200867	0.850295	0.484055
	0.845	8941.23	4328.2	2951.49		189.23	1798.9	502.486		0.221581	0.867713	0.469928		0.221581	0.867713	0.469928
	0.91	9106.36	4268.76	2867.04		354.36	1739.46	418.04		0.414941	0.839042	0.390954		0.414941	0.839042	0.390954
	0.975	9382.59	4410.43	2769.51		630.59	1881.13	320.51		0.738396	0.907378	0.299743		0.738396	0.907378	0.299743
	1.04	9393.13	4576.22	2804.29		641.13	2046.92	355.286		0.750738	0.987348	0.332266		0.750738	0.987348	0.332266
	1.105	9308.43	4556.46	2905.68		556.43	2027.16	456.683		0.651557	0.977816	0.427093		0.651557	0.977816	0.427093
	1.17	9102	4540.06	2892.43		350	2010.76	443.431		0.409836	0.969906	0.4147		0.409836	0.969906	0.4147
	1.235	8737.46	4602.45	2772.34		-14.54	2073.15	323.336		-0.0170258	1	0.302386		0	1	0.302386
	1.3	8701.02	4572.35	2798.43		-50.98	2043.05	349.428		-0.0596956	0.985481	0.326788		0	0.985481	0.326788
	1.365	8989.68	4574.04	2875.32		237.68	2044.74	426.32		0.278314	0.986296	0.398697		0.278314	0.986296	0.398697
	1.43	9283.4	4561.54	2936.8		531.4	2032.24	487.801		0.622248	0.980267	0.456195		0.622248	0.980267	0.456195
	1.495	9349.07	4417.39	2999.74		597.07	1888.09	550.736		0.699145	0.910735	0.515052		0.699145	0.910735	0.515052
	1.56	9231.67	4218.17	3101.86		479.67	1688.87	652.859		0.561674	0.81464	0.610558		0.561674	0.81464	0.610558
	1.625	9144.22	4012	3191.74		392.22	1482.7	742.735		0.459274	0.715192	0.694611		0.459274	0.715192	0.694611
	1.69	8983.36	3895.09	3281.79		231.36	1365.79	832.787		0.270913	0.658799	0.778828		0.270913	0.658799	0.778828
	1.755	8808.29	3707.52	3415.83		56.29	1178.22	966.829		0.0659133	0.568324	0.904185		0.0659133	0.568324	0.904185
	1.82	8670.64	3539.24	3288		-81.36	1009.94	839		-0.0952693	0.487152	0.784639		0	0.487152	0.784639
	1.885	8305.22	3524.49	3198.17		-446.78	995.19	749.167		-0.523162	0.480038	0.700626		0	0.480038	0.700626
	1.95	8664.57	3360.47	2995.45		-87.43	831.17	546.449		-0.102377	0.400921	0.511043		0	0.400921	0.511043
	2.015	8723.33	3337.13	3042.72		-28.67	807.83	593.716		-0.0335714	0.389663	0.555247		0	0.389663	0.555247
	2.08	9027.33	3205.51	3032.37		275.33	676.21	583.366		0.3224	0.326175	0.545568		0.3224	0.326175	0.545568
	2.145	9026.71	3311.16	3074.21		274.71	781.86	625.209		0.321674	0.377136	0.5847		0.321674	0.377136	0.5847
	2.21	9177.59	3143.65	2971.57		425.59	614.35	522.572		0.498349	0.296336	0.488713		0.498349	0.296336	0.488713
	2.275	9606	2999	3036		854	469.7	587		1	0.226563	0.548967		1	0.226563	0.548967
	Background	8752	2529.3	2481	Maximum value	892	2070.37	1008.64		1	1	1		1	1	1
	0	8312	3442	2965		-440	912.7	160.44		-0.493274	0.440839	0.159066		0	0.440839	0.159066
	0.065	8510.32	3441.13	3067.15		-241.68	911.83	262.59		-0.270942	0.440419	0.260341		0	0.440419	0.260341
	0.13	8574.58	3506.49	2986.08		-177.42	977.19	181.52		-0.198901	0.471988	0.179965		0	0.471988	0.179965
	0.195	8446.38	3629.03	3013.24		-305.62	1099.73	208.68		-0.342623	0.531176	0.206892		0	0.531176	0.206892
	0.26	8536.4	3620.65	3104.48		-215.6	1091.35	299.92		-0.241704	0.527128	0.297351		0	0.527128	0.297351
	0.325	8569.57	3805.31	3263.9		-182.43	1276.01	459.34		-0.204518	0.61632	0.455405		0	0.61632	0.455405
	0.39	8610.63	3975.89	3304.84		-141.37	1446.59	500.28		-0.158487	0.698711	0.495995		0	0.698711	0.495995
	0.455	8691.6	4033.4	3491		-60.4	1504.1	686.44		-0.067713	0.726489	0.68056		0	0.726489	0.68056
	0.52	8748.67	4088.71	3471.93		-3.33	1559.41	667.37		-0.00373318	0.753204	0.661653		0	0.753204	0.661653
	0.585	9092.45	4298.81	3538.47		340.45	1769.51	733.91		0.38167	0.854683	0.727623		0.38167	0.854683	0.727623
	0.65	9416.51	4381.49	3419.12		664.51	1852.19	614.56		0.744966	0.894618	0.609296		0.744966	0.894618	0.609296
	0.715	9409.43	4432.04	3286.53		657.43	1902.74	481.97		0.737029	0.919034	0.477841		0.737029	0.919034	0.477841
	0.78	9269.13	4469.56	3141.98		517.13	1940.26	337.42		0.579742	0.937156	0.33453		0.579742	0.937156	0.33453
	0.845	9181.43	4556.14	3068.09		429.43	2026.84	263.53		0.481424	0.978975	0.261273		0.481424	0.978975	0.261273
	0.91	9396.6	4538.8	2945.8		644.6	2009.5	141.24		0.722646	0.970599	0.14003		0.722646	0.970599	0.14003
	0.975	9315.69	4599.67	2855.08		563.69	2070.37	50.52		0.631939	1	0.0500872		0.631939	1	0.0500872
	1.04	9176.77	4518.87	2804.56		424.77	1989.57	0		0.4762	0.960973	0		0.4762	0.960973	0
	1.105	9039.01	4470.86	2867.87		287.01	1941.56	63.31		0.32176	0.937784	0.0627677		0.32176	0.937784	0.0627677
	1.17	8890.24	4492.69	2855.24		138.24	1963.39	50.68		0.154978	0.948328	0.0502459		0.154978	0.948328	0.0502459
	1.235	8957.84	4450.02	2881.21		205.84	1920.72	76.65		0.230762	0.927718	0.0759934		0.230762	0.927718	0.0759934
	1.3	9151.51	4333.31	2997.53		399.51	1804.01	192.97		0.447881	0.871347	0.191317		0.447881	0.871347	0.191317
	1.365	9246.4	4329.2	3020.2		494.4	1799.9	215.64		0.55426	0.869362	0.213793		0.55426	0.869362	0.213793
	1.43	9509.98	4270.47	3111.17		757.98	1741.17	306.61		0.849753	0.840995	0.303984		0.849753	0.840995	0.303984
	1.495	9540.07	4069.5	3168		788.07	1540.2	363.44		0.883487	0.743925	0.360327		0.883487	0.743925	0.360327
	1.56	9338.11	3999.2	3282		586.11	1469.9	477.44		0.657074	0.70997	0.47335		0.657074	0.70997	0.47335
	1.625	9273.37	3816.24	3510.24		521.37	1286.94	705.68		0.584496	0.621599	0.699635		0.584496	0.621599	0.699635
	1.69	9274.11	3818.91	3714.02		522.11	1289.61	909.46		0.585325	0.622889	0.90167		0.585325	0.622889	0.90167
	1.755	9339.73	3520.44	3707.89		587.73	991.14	903.33		0.65889	0.478726	0.895592		0.65889	0.478726	0.895592
	1.82	9332.4	3298	3813.2		580.4	768.7	1008.64		0.650673	0.371286	1		0.650673	0.371286	1
	1.885	9194.6	3244.92	3738.02		442.6	715.62	933.46		0.496188	0.345648	0.925464		0.496188	0.345648	0.925464
	1.95	9239.47	3096.33	3710.65		487.47	567.03	906.09		0.546491	0.273879	0.898328		0.546491	0.273879	0.898328
	2.015	9496.69	2990.38	3613.47		744.69	461.08	808.91		0.834854	0.222704	0.801981		0.834854	0.222704	0.801981
	2.08	9509.07	3012.25	3463.35		757.07	482.95	658.79		0.848733	0.233267	0.653147		0.848733	0.233267	0.653147
	2.145	9502.59	2906.1	3398.87		750.59	376.8	594.31		0.841469	0.181996	0.589219		0.841469	0.181996	0.589219
	2.21	9326.54	2947.11	3401.75		574.54	417.81	597.19		0.644103	0.201805	0.592074		0.644103	0.201805	0.592074
	2.275	9644	2996	3175		892	466.7	370.44		1	0.225419	0.367267		1	0.225419	0.367267

## Sheet: Analysis BI2536
	BI2536
	HeLa_tetCENPBmCRMI1_STB-MG132_+Dox_BI2536_BLM-RFP-BubR1-06.czi
		BLM	CENPB-mCherry-RMI1	BubR1											(IFX>0, X,0)
	Distance (microns)	Gray Value	Gray Value	Gray Value		Background Correction				Normalise to maximum value				Normalise to maximum value
	Background	7563.5	3552.7	2365.5	Maximum Value	8716.5	3136.71	2146.91		BLM	CENPB-mCherry-RMI1	BubR1		BLM	CENPB-mCherry-RMI1	BubR1
	0	11601	4879	3377		4037.5	1326.3	1011.5		0.463202	0.422832	0.471142		0.463202	0.422832	0.471142
	0.065	11788.4	4997.29	3446.71		4224.91	1444.59	1081.21		0.484703	0.460543	0.503612		0.484703	0.460543	0.503612
	0.13	11926.9	4986.29	3458.24		4363.44	1433.59	1092.74		0.500595	0.457036	0.508983		0.500595	0.457036	0.508983
	0.195	11266.1	5146.29	3461.76		3702.62	1593.59	1096.26		0.424783	0.508045	0.510622		0.424783	0.508045	0.510622
	0.26	10927.9	5087.24	3568.94		3364.38	1534.54	1203.44		0.385978	0.48922	0.560545		0.385978	0.48922	0.560545
	0.325	10844.7	5325.53	3555.18		3281.21	1772.83	1189.68		0.376437	0.565188	0.554136		0.376437	0.565188	0.554136
	0.39	11419.5	5333.88	3597.06		3855.97	1781.18	1231.56		0.442376	0.56785	0.573643		0.442376	0.56785	0.573643
	0.455	11061.2	5456.47	3745.47		3497.68	1903.77	1379.97		0.401271	0.606932	0.64277		0.401271	0.606932	0.64277
	0.52	11286.9	5532.35	4050.76		3723.38	1979.65	1685.26		0.427165	0.631123	0.78497		0.427165	0.631123	0.78497
	0.585	11233.1	5626.41	4425.53		3669.56	2073.71	2060.03		0.42099	0.66111	0.959533		0.42099	0.66111	0.959533
	0.65	11818.5	5714.35	4358.88		4254.97	2161.65	1993.38		0.488151	0.689146	0.928488		0.488151	0.689146	0.928488
	0.715	12752.4	5806.94	4492		5188.91	2254.24	2126.5		0.595297	0.718664	0.990493		0.595297	0.718664	0.990493
	0.78	13200.2	6183	4283.18		5636.68	2630.3	1917.68		0.646668	0.838554	0.893228		0.646668	0.838554	0.893228
	0.845	13516.9	6403	4053.82		5953.38	2850.3	1688.32		0.683001	0.908691	0.786395		0.683001	0.908691	0.786395
	0.91	13889.8	6468.82	3939.47		6326.32	2916.12	1573.97		0.725787	0.929675	0.733133		0.725787	0.929675	0.733133
	0.975	15081.1	6606.88	3667.29		7517.56	3054.18	1301.79		0.862452	0.973689	0.606355		0.862452	0.973689	0.606355
	1.04	15860.7	6689.41	3771		8297.21	3136.71	1405.5		0.951897	1	0.654662		0.951897	1	0.654662
	1.105	16280	6571	3703		8716.5	3018.3	1337.5		1	0.96225	0.622988		1	0.96225	0.622988
	1.17	15697.8	6382.53	4008		8134.26	2829.83	1642.5		0.933203	0.902165	0.765053		0.933203	0.902165	0.765053
	1.235	14854.2	5944.35	4205.41		7290.68	2391.65	1839.91		0.836423	0.762471	0.857004		0.836423	0.762471	0.857004
	1.3	13493.7	5634.12	4449.18		5930.21	2081.42	2083.68		0.680343	0.663568	0.970548		0.680343	0.663568	0.970548
	1.365	12527.8	5237.88	4512.41		4964.26	1685.18	2146.91		0.569524	0.537244	1		0.569524	0.537244	1
	1.43	11638.3	4925.41	4057.76		4074.79	1372.71	1692.26		0.46748	0.437627	0.788231		0.46748	0.437627	0.788231
	1.495	10981.8	4658.53	3648.94		3418.26	1105.83	1283.44		0.39216	0.352545	0.597808		0.39216	0.352545	0.597808
	1.56	10301.9	4533.94	3183.29		2738.38	981.24	817.79		0.314161	0.312825	0.380915		0.314161	0.312825	0.380915
	1.625	9733.18	4370.35	2971		2169.68	817.65	605.5		0.248916	0.260671	0.282033		0.248916	0.260671	0.282033
	1.69	9840.82	4346.06	3061.06		2277.32	793.36	695.56		0.261265	0.252927	0.323982		0.261265	0.252927	0.323982
	1.755	9502.65	4166	2787.06		1939.15	613.3	421.56		0.222469	0.195523	0.196357		0.222469	0.195523	0.196357
	1.82	9337.59	4143	2783.29		1774.09	590.3	417.79		0.203532	0.188191	0.194601		0.203532	0.188191	0.194601
	1.885	8932.53	4094.94	2810.29		1369.03	542.24	444.79		0.157062	0.172869	0.207177		0.157062	0.172869	0.207177
	1.95	8999.53	4085	2764		1436.03	532.3	398.5		0.164748	0.1697	0.185616		0.164748	0.1697	0.185616
	2.015	8992.88	4030.35	2775.76		1429.38	477.65	410.26		0.163986	0.152277	0.191093		0.163986	0.152277	0.191093
	2.08	8931.35	3873.06	2767.29		1367.85	320.36	401.79		0.156927	0.102132	0.187148		0.156927	0.102132	0.187148
	2.145	8714	3880.47	2763.35		1150.5	327.77	397.85		0.131991	0.104495	0.185313		0.131991	0.104495	0.185313
	2.21	8321	3832	2729		757.5	279.3	363.5		0.0869041	0.0890423	0.169313		0.0869041	0.0890423	0.169313
	Background	7563.5	3552.7	2365.5	Maximum Value	9327.58	3474.51	2734.78
	0	9153	4242	2631		1589.5	689.3	265.5		0.170409	0.198388	0.0970828		0.170409	0.198388	0.0970828
	0.065	9348.72	4225.92	2690.79		1785.22	673.22	325.29		0.191392	0.19376	0.118946		0.191392	0.19376	0.118946
	0.13	9514.52	4248.14	2714.12		1951.02	695.44	348.62		0.209167	0.200155	0.127476		0.209167	0.200155	0.127476
	0.195	9616.14	4310.28	2768.36		2052.64	757.58	402.86		0.220061	0.218039	0.14731		0.220061	0.218039	0.14731
	0.26	9647.74	4260.4	2869.28		2084.24	707.7	503.78		0.223449	0.203683	0.184212		0.223449	0.203683	0.184212
	0.325	9673.17	4227.92	3151.28		2109.67	675.22	785.78		0.226175	0.194335	0.287328		0.226175	0.194335	0.287328
	0.39	9864.33	4446.72	3406.11		2300.83	894.02	1040.61		0.24667	0.257308	0.38051		0.24667	0.257308	0.38051
	0.455	10128.2	4638.42	3787.28		2564.67	1085.72	1421.78		0.274956	0.312481	0.519888		0.274956	0.312481	0.519888
	0.52	10576.1	4963.38	4173.11		3012.56	1410.68	1807.61		0.322973	0.406008	0.660971		0.322973	0.406008	0.660971
	0.585	11437.8	5264.12	4242.12		3874.25	1711.42	1876.62		0.415354	0.492564	0.686205		0.415354	0.492564	0.686205
	0.65	12406.3	5516.32	4196.36		4842.8	1963.62	1830.86		0.519191	0.56515	0.669472		0.519191	0.56515	0.669472
	0.715	13945.5	6195.98	4010.43		6381.99	2643.28	1644.93		0.684206	0.760763	0.601485		0.684206	0.760763	0.601485
	0.78	15403.3	6512	3687.22		7839.83	2959.3	1321.72		0.8405	0.851717	0.4833		0.8405	0.851717	0.4833
	0.845	16505.2	6728.34	3502.47		8941.75	3175.64	1136.97		0.958636	0.913982	0.415745		0.958636	0.913982	0.415745
	0.91	16891.1	6882.4	3380.54		9327.58	3329.7	1015.04		1	0.958322	0.37116		1	0.958322	0.37116
	0.975	16831	7027.21	3277.21		9267.55	3474.51	911.71		0.993564	1	0.333376		0.993564	1	0.333376
	1.04	16222	6869.78	3397.67		8658.49	3317.08	1032.17		0.928268	0.95469	0.377423		0.928268	0.95469	0.377423
	1.105	15573.7	6489.67	3413.76		8010.21	2936.97	1048.26		0.858766	0.84529	0.383307		0.858766	0.84529	0.383307
	1.17	14880.5	6351	3519.5		7317	2798.3	1154		0.784448	0.80538	0.421972		0.784448	0.80538	0.421972
	1.235	13924.8	6175.99	3626.85		6361.27	2623.29	1261.35		0.681985	0.75501	0.461225		0.681985	0.75501	0.461225
	1.3	13309.1	6135.05	3695.12		5745.64	2582.35	1329.62		0.615984	0.743227	0.486189		0.615984	0.743227	0.486189
	1.365	12538	5922.57	3957.36		4974.47	2369.87	1591.86		0.533308	0.682073	0.58208		0.533308	0.682073	0.58208
	1.43	11988.2	5814.82	4174.4		4424.69	2262.12	1808.9		0.474366	0.651062	0.661443		0.474366	0.651062	0.661443
	1.495	11472.9	5589.06	4433.72		3909.44	2036.36	2068.22		0.419127	0.586086	0.756266		0.419127	0.586086	0.756266
	1.56	11231	5364.44	4624.78		3667.5	1811.74	2259.28		0.393189	0.521438	0.826129		0.393189	0.521438	0.826129
	1.625	10882.8	5134.01	4805.08		3319.31	1581.31	2439.58		0.35586	0.455117	0.892057		0.35586	0.455117	0.892057
	1.69	11059.6	5002.78	5100.28		3496.15	1450.08	2734.78		0.374819	0.417348	1		0.374819	0.417348	1
	1.755	11017	5036.75	4775.62		3453.5	1484.05	2410.12		0.370246	0.427125	0.881285		0.370246	0.427125	0.881285
	1.82	10842	4950.6	4521.49		3278.45	1397.9	2155.99		0.351479	0.40233	0.78836		0.351479	0.40233	0.78836
	1.885	10695.4	4794.15	4311.88		3131.92	1241.45	1946.38		0.33577	0.357302	0.711714		0.33577	0.357302	0.711714
	1.95	10548.1	4668.61	4027.89		2984.56	1115.91	1662.39		0.319972	0.32117	0.60787		0.319972	0.32117	0.60787
	2.015	10627.1	4565.42	3817.89		3063.59	1012.72	1452.39		0.328444	0.291471	0.531081		0.328444	0.291471	0.531081
	2.08	10671.3	4533.83	3639.38		3107.77	981.13	1273.88		0.333181	0.282379	0.465807		0.333181	0.282379	0.465807
	2.145	10506.7	4572.57	3632.49		2943.22	1019.87	1266.99		0.31554	0.293529	0.463288		0.31554	0.293529	0.463288
	2.21	10399.2	4620.7	3630.36		2835.66	1068	1264.86		0.304008	0.307381	0.462509		0.304008	0.307381	0.462509
	2.275	10098	4588.05	3644.18		2534.51	1035.35	1278.68		0.271722	0.297984	0.467562		0.271722	0.297984	0.467562
	2.34	9905	4494	3533		2341.5	941.3	1167.5		0.25103	0.270916	0.426908		0.25103	0.270916	0.426908
	Background	7563.5	3552.7	2365.5	Maximum Value	14833	7030.34	2204.37
	0	11917	5432	3141		4353.5	1879.3	775.5		0.293501	0.267313	0.351801		0.293501	0.267313	0.351801
	0.065	11896.6	5399.94	3148.98		4333.1	1847.24	783.48		0.292126	0.262753	0.355421		0.292126	0.262753	0.355421
	0.13	12018.7	5605.41	3205.19		4455.2	2052.71	839.69		0.300357	0.291979	0.380921		0.300357	0.291979	0.380921
	0.195	12255.5	5926.67	3355.67		4692	2373.97	990.17		0.316322	0.337675	0.449185		0.316322	0.337675	0.449185
	0.26	12457.4	6228.07	3317.7		4893.9	2675.37	952.2		0.329933	0.380546	0.43196		0.329933	0.380546	0.43196
	0.325	13272.1	6524.13	3465.91		5708.6	2971.43	1100.41		0.384858	0.422658	0.499195		0.384858	0.422658	0.499195
	0.39	13940.7	6959.33	3624.67		6377.2	3406.63	1259.17		0.429933	0.484561	0.571215		0.429933	0.484561	0.571215
	0.455	14973.2	7569.17	3751.31		7409.7	4016.47	1385.81		0.499542	0.571305	0.628665		0.499542	0.571305	0.628665
	0.52	16115.9	8005.19	4092.48		8552.4	4452.49	1726.98		0.576579	0.633325	0.783435		0.576579	0.633325	0.783435
	0.585	17321.5	8407	4289		9758	4854.3	1923.5		0.657857	0.690479	0.872585		0.657857	0.690479	0.872585
	0.65	18629.1	8723.59	4479.15		11065.6	5170.89	2113.65		0.746012	0.735511	0.958845		0.746012	0.735511	0.958845
	0.715	19543.3	9086.52	4569.87		11979.8	5533.82	2204.37		0.807645	0.787134	1		0.807645	0.787134	1
	0.78	19870.7	9549.33	4486.33		12307.2	5996.63	2120.83		0.829718	0.852964	0.962103		0.829718	0.852964	0.962103
	0.845	19543.1	9875.94	4224.37		11979.6	6323.24	1858.87		0.807632	0.899422	0.843266		0.807632	0.899422	0.843266
	0.91	19500.6	10099.1	4082.96		11937.1	6546.41	1717.46		0.804766	0.931165	0.779116		0.804766	0.931165	0.779116
	0.975	19481.2	10122.5	3959.83		11917.7	6569.8	1594.33		0.803459	0.934492	0.723259		0.803459	0.934492	0.723259
	1.04	20320.6	10334.2	3799.11		12757.1	6781.49	1433.61		0.860049	0.964603	0.650349		0.860049	0.964603	0.650349
	1.105	21146.8	10583	3718.19		13583.3	7030.34	1352.69		0.915749	1	0.61364		0.915749	1	0.61364
	1.17	21143	10518	3744		13579.5	6965.3	1378.5		0.915492	0.990749	0.625349		0.915492	0.990749	0.625349
	1.235	21196.4	10531.9	3705.78		13632.9	6979.19	1340.28		0.919093	0.992724	0.60801		0.919093	0.992724	0.60801
	1.3	21365.8	10223.7	3668.37		13802.3	6671	1302.87		0.930513	0.948887	0.59104		0.930513	0.948887	0.59104
	1.365	22301.8	10221.3	3868.17		14738.3	6668.63	1502.67		0.993616	0.94855	0.681678		0.993616	0.94855	0.681678
	1.43	22396.5	9527.3	4033.07		14833	5974.6	1667.57		1	0.849831	0.756484		1	0.849831	0.756484
	1.495	21887.7	9212.94	4079.35		14324.2	5660.24	1713.85		0.965698	0.805116	0.777478		0.965698	0.805116	0.777478
	1.56	20712.7	9021	4176.67		13149.2	5468.3	1811.17		0.886483	0.777814	0.821627		0.886483	0.777814	0.821627
	1.625	19246.2	8567.06	4201.54		11682.7	5014.36	1836.04		0.787615	0.713246	0.832909		0.787615	0.713246	0.832909
	1.69	18151	8202.37	4151.59		10587.5	4649.67	1786.09		0.71378	0.661372	0.81025		0.71378	0.661372	0.81025
	1.755	17366	8142	4104		9802.5	4589.3	1738.5		0.660858	0.652785	0.788661		0.660858	0.652785	0.788661
	1.82	16384.1	7936.67	3985.52		8820.6	4383.97	1620.02		0.594661	0.623579	0.734913		0.594661	0.623579	0.734913
	1.885	15921.5	7771.48	3854.39		8358	4218.78	1488.89		0.563473	0.600082	0.675427		0.563473	0.600082	0.675427
	1.95	15852.7	7644.67	3742.33		8289.2	4091.97	1376.83		0.558835	0.582044	0.624591		0.558835	0.582044	0.624591
	2.015	15602.5	7598.8	3785.44		8039	4046.1	1419.94		0.541967	0.57552	0.644148		0.541967	0.57552	0.644148
	2.08	15382.4	7555.85	3771.41		7818.9	4003.15	1405.91		0.527129	0.569411	0.637783		0.527129	0.569411	0.637783
	2.145	14832.2	7178.67	3590.33		7268.7	3625.97	1224.83		0.490036	0.51576	0.555637		0.490036	0.51576	0.555637
	2.21	14793.8	7010.96	3606.56		7230.3	3458.26	1241.06		0.487447	0.491905	0.563		0.487447	0.491905	0.563
	2.275	14495.6	6702.89	3741.63		6932.1	3150.19	1376.13		0.467343	0.448085	0.624274		0.467343	0.448085	0.624274
	2.34	14191	6263	3752		6627.5	2710.3	1386.5		0.446808	0.385515	0.628978		0.446808	0.385515	0.628978
	Background	7563.5	3552.7	2365.5	Maximum Value	11071.7	2593.42	1167.7
	0	9871	4438	2746		2307.5	885.3	380.5		0.208415	0.341364	0.325854		0.208415	0.341364	0.325854
	0.065	10199	4247.43	2880.5		2635.48	694.73	515		0.238038	0.267882	0.441038		0.238038	0.267882	0.441038
	0.13	9878.01	4130.17	2882.31		2314.51	577.47	516.81		0.209048	0.222667	0.442588		0.209048	0.222667	0.442588
	0.195	9822.79	4185.35	2978.97		2259.29	632.65	613.47		0.204061	0.243944	0.525366		0.204061	0.243944	0.525366
	0.26	9815.46	4230.08	3103.01		2251.96	677.38	737.51		0.203399	0.261192	0.631592		0.203399	0.261192	0.631592
	0.325	10076.5	4313.27	3348.24		2512.95	760.57	982.74		0.226971	0.293269	0.841603		0.226971	0.293269	0.841603
	0.39	10395.5	4528.88	3492.33		2832.04	976.18	1126.83		0.255792	0.376406	0.965		0.255792	0.376406	0.965
	0.455	11003.2	4454.44	3533.2		3439.7	901.74	1167.7		0.310676	0.347703	1		0.310676	0.347703	1
	0.52	12089.8	4687.43	3451.6		4526.32	1134.73	1086.1		0.40882	0.437542	0.930119		0.40882	0.437542	0.930119
	0.585	12987	4794.98	3389.78		5423.49	1242.28	1024.28		0.489853	0.479012	0.877177		0.489853	0.479012	0.877177
	0.65	13546.8	5016.8	3191.35		5983.28	1464.1	825.85		0.540414	0.564544	0.707245		0.540414	0.564544	0.707245
	0.715	13503.6	5126.4	2958.77		5940.14	1573.7	593.27		0.536518	0.606805	0.508067		0.536518	0.606805	0.508067
	0.78	13273.9	5173.1	2900.19		5710.37	1620.4	534.69		0.515765	0.624812	0.4579		0.515765	0.624812	0.4579
	0.845	12957.1	5106.33	2726.2		5393.65	1553.63	360.7		0.487158	0.599066	0.308898		0.487158	0.599066	0.308898
	0.91	12791.2	5031.12	2577.24		5227.66	1478.42	211.74		0.472166	0.570066	0.181331		0.472166	0.570066	0.181331
	0.975	12566.8	5137.08	2550.92		5003.3	1584.38	185.42		0.451902	0.610923	0.158791		0.451902	0.610923	0.158791
	1.04	12583.7	5158.1	2478.48		5020.2	1605.4	112.98		0.453428	0.619028	0.0967543		0.453428	0.619028	0.0967543
	1.105	13114.4	5280.22	2556.46		5550.85	1727.52	190.96		0.501357	0.666117	0.163535		0.501357	0.666117	0.163535
	1.17	13701	5171.82	2607		6137.54	1619.12	241.5		0.554347	0.624318	0.206817		0.554347	0.624318	0.206817
	1.235	14770.6	5241.23	2676.73		7207.13	1688.53	311.23		0.650953	0.651082	0.266532		0.650953	0.651082	0.266532
	1.3	16431.9	5618.73	2734.9		8868.38	2066.03	369.4		0.800998	0.796643	0.316348		0.800998	0.796643	0.316348
	1.365	17787.2	5808	2864.48		10223.7	2255.3	498.98		0.923408	0.869624	0.427319		0.923408	0.869624	0.427319
	1.43	18635.2	6044.39	3007.77		11071.7	2491.69	642.27		1	0.960774	0.55003		1	0.960774	0.55003
	1.495	18615.3	6146.12	3139.19		11051.8	2593.42	773.69		0.998209	1	0.662576		0.998209	1	0.662576
	1.56	17687.3	5829.68	3197.29		10123.8	2276.98	831.79		0.914391	0.877984	0.712332		0.914391	0.877984	0.712332
	1.625	16061.7	5683.86	3422.67		8498.19	2131.16	1057.17		0.767562	0.821757	0.905344		0.767562	0.821757	0.905344
	1.69	14041	5259.42	3405.46		6477.46	1706.72	1039.96		0.585049	0.658096	0.890605		0.585049	0.658096	0.890605
	1.755	12486.5	4997.4	3358.21		4922.95	1444.7	992.71		0.444644	0.557064	0.850141		0.444644	0.557064	0.850141
	1.82	11264.4	5085.68	3195.52		3700.94	1532.98	830.02		0.334271	0.591104	0.710816		0.334271	0.591104	0.710816
	1.885	10775.4	5138.82	2842.24		3211.94	1586.12	476.74		0.290105	0.611594	0.408273		0.290105	0.611594	0.408273
	1.95	10855.2	5326.65	2639.78		3291.66	1773.95	274.28		0.297305	0.68402	0.234889		0.297305	0.68402	0.234889
	2.015	10894.8	5357.16	2565.43		3331.25	1804.46	199.93		0.300881	0.695784	0.171217		0.300881	0.695784	0.171217
	2.08	10548.8	5225.99	2533.78		2985.31	1673.29	168.28		0.269635	0.645206	0.144112		0.269635	0.645206	0.144112
	2.145	10416.5	5266.94	2462.56		2853	1714.24	97.06		0.257685	0.660996	0.0831207		0.257685	0.660996	0.0831207
	2.21	10217	5003.19	2419.99		2653.45	1450.49	54.49		0.239661	0.559296	0.0466644		0.239661	0.559296	0.0466644
	2.275	9853	4982	2527		2289.5	1429.3	161.5		0.206789	0.551126	0.138306		0.206789	0.551126	0.138306
	Background	7563.5	3552.7	2365.5	Maximum Value	6944.99	2690.79	1686.5
	0	10218	4689	2675		2654.5	1136.3	309.5		0.382218	0.422292	0.183516		0.382218	0.422292	0.183516
	0.065	10433.6	4709.46	2619.4		2870.07	1156.76	253.9		0.413258	0.429896	0.150548		0.413258	0.429896	0.150548
	0.13	10336.4	4855.2	2745.54		2772.93	1302.5	380.04		0.399271	0.484059	0.225342		0.399271	0.484059	0.225342
	0.195	10639.7	4637.49	2759.14		3076.24	1084.79	393.64		0.442944	0.403149	0.233406		0.442944	0.403149	0.233406
	0.26	10140.7	4765.83	2802.91		2577.19	1213.13	437.41		0.371086	0.450845	0.25936		0.371086	0.450845	0.25936
	0.325	10285.1	4667	2888.43		2721.64	1114.3	522.93		0.391885	0.414116	0.310068		0.391885	0.414116	0.310068
	0.39	10344.6	4669.77	3072.03		2781.07	1117.07	706.53		0.400443	0.415146	0.418933		0.400443	0.415146	0.418933
	0.455	10581	4601.4	3240.2		3017.5	1048.7	874.7		0.434486	0.389737	0.518648		0.434486	0.389737	0.518648
	0.52	10643.3	4757.94	3316.6		3079.81	1205.24	951.1		0.443458	0.447913	0.563949		0.443458	0.447913	0.563949
	0.585	10696.3	4945.6	3488.89		3132.84	1392.9	1123.39		0.451094	0.517655	0.666107		0.451094	0.517655	0.666107
	0.65	11075.9	5108.57	3427.43		3512.36	1555.87	1061.93		0.50574	0.578221	0.629665		0.50574	0.578221	0.629665
	0.715	11233.5	5417.74	3415		3670.01	1865.04	1049.5		0.52844	0.69312	0.622295		0.52844	0.69312	0.622295
	0.78	11566.5	5594.86	3317.89		4003.04	2042.16	952.39		0.576392	0.758944	0.564714		0.576392	0.758944	0.564714
	0.845	11595.1	5643.51	3045.49		4031.61	2090.81	679.99		0.580506	0.777025	0.403196		0.580506	0.777025	0.403196
	0.91	12045.8	5732.4	2888.4		4482.3	2179.7	522.9		0.6454	0.810059	0.31005		0.6454	0.810059	0.31005
	0.975	12600.1	5659.14	2976.43		5036.64	2106.44	610.93		0.725219	0.782833	0.362247		0.725219	0.782833	0.362247
	1.04	12618.7	5605.83	2927.83		5055.19	2053.13	562.33		0.72789	0.763021	0.33343		0.72789	0.763021	0.33343
	1.105	12895.3	5490.4	2956.31		5331.81	1937.7	590.81		0.76772	0.720123	0.350317		0.76772	0.720123	0.350317
	1.17	12970.4	5526.91	3095.63		5406.9	1974.21	730.13		0.778532	0.733692	0.432926		0.778532	0.733692	0.432926
	1.235	13695.4	5838.46	3207.91		6131.93	2285.76	842.41		0.882929	0.849475	0.499502		0.882929	0.849475	0.499502
	1.3	14481.7	5814.86	3175.43		6918.21	2262.16	809.93		0.996144	0.840705	0.480243		0.996144	0.840705	0.480243
	1.365	14482	6116	3181.6		6918.5	2563.3	816.1		0.996186	0.95262	0.483902		0.996186	0.95262	0.483902
	1.43	14402.6	6243.49	3429.8		6839.07	2690.79	1064.3		0.984749	1	0.63107		0.984749	1	0.63107
	1.495	14508.5	6241.23	3539.06		6944.99	2688.53	1173.56		1	0.99916	0.695855		1	0.99916	0.695855
	1.56	14063.5	6180.74	3818.6		6500.01	2628.04	1453.1		0.935928	0.97668	0.861607		0.935928	0.97668	0.861607
	1.625	13383.4	6070.71	4052		5819.93	2518.01	1686.5		0.838004	0.935788	1		0.838004	0.935788	1
	1.69	11874.2	5728.94	3954.09		4310.7	2176.24	1588.59		0.620692	0.808774	0.941945		0.620692	0.808774	0.941945
	1.755	11150.5	5396.91	3767.46		3586.96	1844.21	1401.96		0.516482	0.685379	0.831284		0.516482	0.685379	0.831284
	1.82	10816.2	5246.8	3586.2		3252.7	1694.1	1220.7		0.468352	0.629592	0.723807		0.468352	0.629592	0.723807
	1.885	10540.7	5204.63	3356.63		2977.19	1651.93	991.13		0.428682	0.61392	0.587685		0.428682	0.61392	0.587685
	1.95	10316.3	5056	3391.29		2752.79	1503.3	1025.79		0.396371	0.558684	0.608236		0.396371	0.558684	0.608236
	2.015	9958.09	5046	3005.77		2394.59	1493.3	640.27		0.344794	0.554967	0.379644		0.344794	0.554967	0.379644
	2.08	9963.57	4796.74	3160.66		2400.07	1244.04	795.16		0.345583	0.462333	0.471485		0.345583	0.462333	0.471485
	2.145	9934	4885.46	3034.54		2370.5	1332.76	669.04		0.341325	0.495304	0.396703		0.341325	0.495304	0.396703
	2.21	9664	4957.54	3100.23		2100.5	1404.84	734.73		0.302448	0.522092	0.435654		0.302448	0.522092	0.435654
	2.275	9799	5179	3127		2235.5	1626.3	761.5		0.321887	0.604395	0.451527		0.321887	0.604395	0.451527
	HeLa_tetCENPBmCRMI1_STB-MG132_+Dox_BI2536_BLM-RFP-BubR1-07.czi
	Background	14045.7	3909.9	3797	Maximum Value	6272.88	3217.77	1595.67
	0	17707	5720	4682		3661.3	1810.1	885		0.583671	0.562532	0.554626		0.583671	0.562532	0.554626
	0.065	17924.7	5773.77	4658.78		3878.95	1863.87	861.78		0.618368	0.579243	0.540074		0.618368	0.579243	0.540074
	0.13	18111.7	5827.06	4834		4066.01	1917.16	1037		0.648189	0.595804	0.649884		0.648189	0.595804	0.649884
	0.195	18049.9	5981.28	5049.8		4004.21	2071.38	1252.8		0.638337	0.643732	0.785125		0.638337	0.643732	0.785125
	0.26	17969.3	6114.85	5277.82		3923.56	2204.95	1480.82		0.62548	0.685242	0.928024		0.62548	0.685242	0.928024
	0.325	18095.6	6249.23	5386.61		4049.88	2339.33	1589.61		0.645617	0.727003	0.996202		0.645617	0.727003	0.996202
	0.39	18167.9	6456	5392.67		4122.18	2546.1	1595.67		0.657143	0.791262	1		0.657143	0.791262	1
	0.455	17846	6649.25	5284.14		3800.35	2739.35	1487.14		0.605838	0.851319	0.931985		0.605838	0.851319	0.931985
	0.52	17854.3	6870.25	5023.83		3808.65	2960.35	1226.83		0.607161	0.92	0.768849		0.607161	0.92	0.768849
	0.585	17789.4	6951.43	4630.73		3743.67	3041.53	833.73		0.596802	0.945229	0.522495		0.596802	0.945229	0.522495
	0.65	17969.2	7000.6	4394.96		3923.54	3090.7	597.96		0.625477	0.96051	0.374739		0.625477	0.96051	0.374739
	0.715	18094.9	7127.67	4265.87		4049.21	3217.77	468.87		0.645511	1	0.293839		0.645511	1	0.293839
	0.78	18001.7	7118.75	4135.51		3956.03	3208.85	338.51		0.630656	0.997228	0.212143		0.630656	0.997228	0.212143
	0.845	17911.2	7100.39	3988.8		3865.52	3190.49	191.8		0.616227	0.991522	0.1202		0.616227	0.991522	0.1202
	0.91	17785.7	6939.67	3913.89		3739.97	3029.77	116.89		0.596213	0.941574	0.0732545		0.596213	0.941574	0.0732545
	0.975	17630.8	6779.6	3921.38		3585.15	2869.7	124.38		0.571532	0.891829	0.0779484		0.571532	0.891829	0.0779484
	1.04	17644.7	6645.96	3825.64		3599.04	2736.06	28.64		0.573746	0.850297	0.0179486		0.573746	0.850297	0.0179486
	1.105	17117.9	6553.59	3875.66		3072.18	2643.69	78.66		0.489756	0.821591	0.0492959		0.489756	0.821591	0.0492959
	1.17	17021	6580.51	3774.53		2975.32	2670.61	-22.47		0.474315	0.829957	-0.0140819		0.474315	0.829957	0
	1.235	17485	6679.12	3840.57		3439.31	2769.22	43.57		0.548282	0.860602	0.0273051		0.548282	0.860602	0.0273051
	1.3	18333.5	6739.04	3891.86		4287.83	2829.14	94.86		0.68355	0.879224	0.0594484		0.68355	0.879224	0.0594484
	1.365	18812.5	6677.75	3909.5		4766.8	2767.85	112.5		0.759906	0.860176	0.0705033		0.759906	0.860176	0.0705033
	1.43	19206.6	6686.11	4057.51		5160.94	2776.21	260.51		0.822739	0.862775	0.163261		0.822739	0.862775	0.163261
	1.495	19352.9	6798.15	4191.09		5307.24	2888.25	394.09		0.846061	0.897594	0.246975		0.846061	0.897594	0.246975
	1.56	20046.3	6730.71	4276.75		6000.63	2820.81	479.75		0.956599	0.876635	0.300657		0.956599	0.876635	0.300657
	1.625	20318.6	6617.18	4360.94		6272.88	2707.28	563.94		1	0.841353	0.353419		1	0.841353	0.353419
	1.69	19469.3	6488.59	4430.45		5423.65	2578.69	633.45		0.864619	0.80139	0.396981		0.864619	0.80139	0.396981
	1.755	18152	6259.59	4553.88		4106.31	2349.69	756.88		0.654613	0.730223	0.474334		0.654613	0.730223	0.474334
	1.82	17312.5	6045.33	4586.67		3266.75	2135.43	789.67		0.520774	0.663637	0.494883		0.520774	0.663637	0.494883
	1.885	16413.3	5765.75	4638.41		2367.6	1855.85	841.41		0.377434	0.57675	0.527308		0.377434	0.57675	0.527308
	1.95	15761.4	5426.12	4523.65		1715.65	1516.22	726.65		0.273503	0.471202	0.455389		0.273503	0.471202	0.455389
	2.015	15271	5183.86	4287.72		1225.32	1273.96	490.72		0.195336	0.395914	0.307532		0.195336	0.395914	0.307532
	2.08	15069.8	5068.07	4183.05		1024.12	1158.17	386.05		0.163262	0.359929	0.241936		0.163262	0.359929	0.241936
	2.145	14900.4	5005	4030.51		854.71	1095.1	233.51		0.136255	0.340329	0.14634		0.136255	0.340329	0.14634
	2.21	15162.9	5042.14	3993.24		1117.17	1132.24	196.24		0.178095	0.351871	0.122983		0.178095	0.351871	0.122983
	2.275	14849.8	4806.53	3916.08		804.08	896.63	119.08		0.128184	0.278649	0.074627		0.128184	0.278649	0.074627
	2.34	15035	4770.08	3860.2		989.26	860.18	63.2		0.157704	0.267322	0.0396072		0.157704	0.267322	0.0396072
	2.405	15215.1	4817.13	3921.86		1169.36	907.23	124.86		0.186415	0.281944	0.0782493		0.186415	0.281944	0.0782493
	2.47	15411.5	4777.61	3910.5		1365.82	867.71	113.5		0.217734	0.269662	0.07113		0.217734	0.269662	0.07113
	2.535	15334.5	4735.79	3835.1		1288.76	825.89	38.1		0.205449	0.256665	0.0238771		0.205449	0.256665	0.0238771
	2.6	15341.2	4734.24	3936.21		1295.5	824.34	139.21		0.206524	0.256184	0.0872423		0.206524	0.256184	0.0872423
	2.665	15580.5	4699.27	3968.6		1534.75	789.37	171.6		0.244664	0.245316	0.107541		0.244664	0.245316	0.107541
	2.73	15506	4640	3835		1460.3	730.1	38		0.232796	0.226896	0.0238144		0.232796	0.226896	0.0238144
	Background	14045.7	3909.9	3797	Maximum Value	7291.21	4403.97	1462.09
	0	19955	8232	4599		5909.3	4322.1	802		0.810469	0.98141	0.548529		0.810469	0.98141	0.548529
	0.065	20511.6	8313.87	4799.31		6465.93	4403.97	1002.31		0.886812	1	0.685534		0.886812	1	0.685534
	0.13	20741.4	8310.8	5131.48		6695.7	4400.9	1334.48		0.918325	0.999303	0.912724		0.918325	0.999303	0.912724
	0.195	21178.5	8275.18	5259.09		7132.76	4365.28	1462.09		0.978268	0.991215	1		0.978268	0.991215	1
	0.26	21161.6	8214.62	5230.9		7115.92	4304.72	1433.9		0.975959	0.977464	0.980718		0.975959	0.977464	0.980718
	0.325	21336.9	8037.21	5137.17		7291.21	4127.31	1340.17		1	0.937179	0.916613		1	0.937179	0.916613
	0.39	21330.6	7905.91	5006.27		7284.94	3996.01	1209.27		0.99914	0.907365	0.827085		0.99914	0.907365	0.827085
	0.455	20912.9	7775.85	4947.65		6867.2	3865.95	1150.65		0.941846	0.877833	0.786987		0.941846	0.877833	0.786987
	0.52	20963	7893.76	4931.27		6917.35	3983.86	1134.27		0.948725	0.904607	0.775788		0.948725	0.904607	0.775788
	0.585	21198.9	7966	4840.36		7153.21	4056.1	1043.36		0.981073	0.92101	0.713611		0.981073	0.92101	0.713611
	0.65	21322.5	7996.16	4667.74		7276.77	4086.26	870.737		0.99802	0.927858	0.595542		0.99802	0.927858	0.595542
	0.715	20920.9	7916.67	4462.11		6875.19	4006.77	665.111		0.942942	0.909809	0.454904		0.942942	0.909809	0.454904
	0.78	20938.9	7844.27	4384.27		6893.21	3934.37	587.273		0.945414	0.893369	0.401667		0.945414	0.893369	0.401667
	0.845	21026.3	7991.78	4365.56		6980.57	4081.88	568.556		0.957395	0.926864	0.388865		0.957395	0.926864	0.388865
	0.91	21068.2	7954.98	4382.19		7022.49	4045.08	585.192		0.963145	0.918508	0.400243		0.963145	0.918508	0.400243
	0.975	20975.1	7754.45	4424.45		6929.39	3844.55	627.455		0.950376	0.872974	0.429149		0.950376	0.872974	0.429149
	1.04	20937.9	7863.14	4499.73		6892.17	3953.24	702.727		0.945271	0.897654	0.480632		0.945271	0.897654	0.480632
	1.105	20187.6	7736.11	4562.58		6141.9	3826.21	765.576		0.84237	0.868809	0.523617		0.84237	0.868809	0.523617
	1.17	19249.7	7484.27	4451.18		5204.03	3574.37	654.182		0.71374	0.811625	0.447429		0.71374	0.811625	0.447429
	1.235	19276.1	7412.44	4648.05		5230.41	3502.54	851.05		0.717358	0.795314	0.582077		0.717358	0.795314	0.582077
	1.3	18719	7216.47	4734.14		4673.34	3306.57	937.142		0.640955	0.750816	0.64096		0.640955	0.750816	0.64096
	1.365	18542.5	7110.55	4798		4496.84	3200.65	1001		0.616748	0.726765	0.684636		0.616748	0.726765	0.684636
	1.43	18170.9	6961.67	4854.22		4125.19	3051.77	1057.22		0.565776	0.692959	0.723089		0.565776	0.692959	0.723089
	1.495	17882	6739.83	4854.83		3836.29	2829.93	1057.83		0.526153	0.642586	0.723504		0.526153	0.642586	0.723504
	1.56	17783.6	6558.55	4793.27		3737.94	2648.65	996.273		0.512664	0.601423	0.681403		0.512664	0.601423	0.681403
	1.625	17853.7	6488.15	4747.18		3808.02	2578.25	950.182		0.522275	0.585438	0.649879		0.522275	0.585438	0.649879
	1.69	17913.5	6488.95	4766.25		3867.76	2579.05	969.252		0.530469	0.585619	0.662922		0.530469	0.585619	0.662922
	1.755	18063	6503.36	4750.55		4017.3	2593.46	953.545		0.550979	0.588891	0.652179		0.550979	0.588891	0.652179
	1.82	18358.2	6333.09	4613.25		4312.54	2423.19	816.252		0.591471	0.550229	0.558277		0.591471	0.550229	0.558277
	1.885	18352.7	6184.09	4616.9		4306.96	2274.19	819.899		0.590706	0.516395	0.560772		0.590706	0.516395	0.560772
	1.95	18215	6080	4551.64		4169.3	2170.1	754.636		0.571826	0.49276	0.516135		0.571826	0.49276	0.516135
	2.015	17854.8	6109.77	4512.99		3809.07	2199.87	715.99		0.522419	0.49952	0.489703		0.522419	0.49952	0.489703
	2.08	17374.7	6031.1	4653.79		3329.03	2121.2	856.788		0.456581	0.481656	0.586002		0.456581	0.481656	0.586002
	2.145	17124	5991	4309		3078.3	2081.1	512		0.422193	0.472551	0.350183		0.422193	0.472551	0.350183
	Background	12045.7	3909.9	3097	Maximum Value	2725.82	1545.88	897.54
	0	11889	3986	3094		-156.7	76.1	-3		-0.0574873	0.0492276	-0.00334247		0	0.0492276	0
	0.065	12032.3	4092.92	3132.53		-13.36	183.02	35.535		-0.00490128	0.118392	0.0395916		0	0.118392	0.0395916
	0.13	12155.9	4232.25	3170.75		110.16	322.35	73.753		0.0404135	0.208522	0.0821724		0.0404135	0.208522	0.0821724
	0.195	12395.7	4291.37	3343.31		349.98	381.47	246.307		0.128394	0.246766	0.274425		0.128394	0.246766	0.274425
	0.26	12499.1	4474.73	3493.4		453.38	564.83	396.396		0.166328	0.365378	0.441647		0.166328	0.365378	0.441647
	0.325	12773.4	4642.48	3623.76		727.65	732.58	526.759		0.266947	0.473892	0.586892		0.266947	0.473892	0.586892
	0.39	13172.3	4654.49	3832.39		1126.62	744.59	735.385		0.413314	0.481661	0.819334		0.413314	0.481661	0.819334
	0.455	13400.7	4803.22	3950.38		1355.01	893.32	853.379		0.497102	0.577872	0.950798		0.497102	0.577872	0.950798
	0.52	13787.5	4909.45	3994.54		1741.85	999.55	897.54		0.639019	0.64659	1		0.639019	0.64659	1
	0.585	13840.6	4952.12	3911.25		1794.94	1042.22	814.252		0.658495	0.674192	0.907204		0.658495	0.674192	0.907204
	0.65	14068.6	4956.5	3889.15		2022.93	1046.6	792.147		0.742136	0.677025	0.882576		0.742136	0.677025	0.882576
	0.715	14157.7	4885.11	3813.37		2112.03	975.21	716.374		0.774824	0.630845	0.798153		0.774824	0.630845	0.798153
	0.78	14199.7	4954.24	3705.45		2154.04	1044.34	608.454		0.790236	0.675563	0.677913		0.790236	0.675563	0.677913
	0.845	14269.9	4962.74	3572.45		2224.23	1052.84	475.451		0.815986	0.681062	0.529727		0.815986	0.681062	0.529727
	0.91	14135.4	5017.27	3455.03		2089.71	1107.37	358.028		0.766635	0.716336	0.398899		0.766635	0.716336	0.398899
	0.975	13957	5098.94	3374.78		1911.33	1189.04	277.776		0.701195	0.769167	0.309486		0.701195	0.769167	0.309486
	1.04	14403.5	5125.31	3356.75		2357.75	1215.41	259.753		0.864969	0.786225	0.289405		0.864969	0.786225	0.289405
	1.105	14610.9	5229.27	3439.51		2565.22	1319.37	342.515		0.941082	0.853475	0.381615		0.941082	0.853475	0.381615
	1.17	14597.2	5300.67	3440.7		2551.49	1390.77	343.704		0.936045	0.899662	0.38294		0.936045	0.899662	0.38294
	1.235	14553	5315	3496		2507.3	1405.1	399		0.919833	0.908932	0.444548		0.919833	0.908932	0.444548
	1.3	14643.7	5342.94	3479.06		2598.01	1433.04	382.064		0.953111	0.927006	0.425679		0.953111	0.927006	0.425679
	1.365	14756.6	5455.78	3488.72		2710.95	1545.88	391.72		0.994545	1	0.436437		0.994545	1	0.436437
	1.43	14771.5	5448.27	3483.96		2725.82	1538.37	386.958		1	0.995142	0.431132		1	0.995142	0.431132
	1.495	14249	5317.95	3407.64		2203.26	1408.05	310.643		0.808293	0.91084	0.346105		0.808293	0.91084	0.346105
	1.56	13892.3	5179.91	3438.15		1846.59	1270.01	341.15		0.677444	0.821545	0.380094		0.677444	0.821545	0.380094
	1.625	13592.7	5188.45	3538.71		1546.99	1278.55	441.709		0.567532	0.827069	0.492133		0.567532	0.827069	0.492133
	1.69	13455.6	5141.32	3597.8		1409.87	1231.42	500.798		0.517228	0.796582	0.557967		0.517228	0.796582	0.557967
	1.755	13603.3	5030.83	3701.32		1557.56	1120.93	604.319		0.57141	0.725108	0.673306		0.57141	0.725108	0.673306
	1.82	13866	4982.5	3740.72		1820.31	1072.6	643.715		0.667803	0.693844	0.717199		0.667803	0.693844	0.717199
	1.885	14189.4	4953.65	3847.54		2143.68	1043.75	750.543		0.786435	0.675182	0.836222		0.786435	0.675182	0.836222
	1.95	14614	4698.17	3845.65		2568.25	788.27	748.648		0.942194	0.509917	0.834111		0.942194	0.509917	0.834111
	2.015	14389.7	4615.38	3665.36		2344.03	705.48	568.363		0.859936	0.456361	0.633245		0.859936	0.456361	0.633245
	2.08	14041.5	4446.26	3522.44		1995.8	536.36	425.443		0.732183	0.346961	0.47401		0.732183	0.346961	0.47401
	2.145	13897.2	4320.76	3561.94		1851.51	410.86	464.939		0.679249	0.265777	0.518015		0.679249	0.265777	0.518015
	2.21	13543.9	4318.03	3568.02		1498.22	408.13	471.022		0.54964	0.264011	0.524792		0.54964	0.264011	0.524792
	2.275	13445.4	4245.99	3472.94		1399.72	336.09	375.936		0.513504	0.21741	0.418852		0.513504	0.21741	0.418852
	2.34	13291.5	4171.4	3485.77		1245.77	261.5	388.767		0.457026	0.169159	0.433147		0.457026	0.169159	0.433147
	2.405	13323.6	4154.73	3553.32		1277.87	244.83	456.316		0.468802	0.158376	0.508407		0.468802	0.158376	0.508407
	2.47	13665	4147	3646		1619.3	237.1	549		0.59406	0.153375	0.611672		0.59406	0.153375	0.611672
	Background	12045.7	3909.9	3097	Maximum Value	3151.15	1026.72	985.913
	0	14095	3807	3808		2049.3	-102.9	711		0.650334	-0.100222	0.721159		0.650334	0	0.721159
	0.065	14366.1	3955.97	3838.62		2320.38	46.07	741.622		0.73636	0.044871	0.752219		0.73636	0.044871	0.752219
	0.13	14276.1	3969.35	3794.81		2230.45	59.45	697.81		0.707821	0.0579028	0.707781		0.707821	0.0579028	0.707781
	0.195	14362.9	3960.44	3799.78		2317.16	50.54	702.779		0.735338	0.0492247	0.712821		0.735338	0.0492247	0.712821
	0.26	14197.4	3999.61	3821.61		2151.69	89.71	724.611		0.682827	0.0873753	0.734964		0.682827	0.0873753	0.734964
	0.325	14095.5	4024.14	3821.89		2049.84	114.24	724.885		0.650505	0.111267	0.735242		0.650505	0.111267	0.735242
	0.39	14213.1	4077.59	3927.5		2167.41	167.69	830.503		0.687816	0.163326	0.842369		0.687816	0.163326	0.842369
	0.455	14295.4	4067.96	3978.45		2249.65	158.06	881.446		0.713914	0.153947	0.89404		0.713914	0.153947	0.89404
	0.52	14089.1	4140.86	3987.87		2043.39	230.96	890.872		0.648458	0.224949	0.903601		0.648458	0.224949	0.903601
	0.585	14449.9	4203.04	4082.91		2404.16	293.14	985.913		0.762947	0.285511	1		0.762947	0.285511	1
	0.65	14384.1	4534.44	4039.43		2338.42	624.54	942.435		0.742085	0.608287	0.955901		0.742085	0.608287	0.955901
	0.715	15124.2	4652.24	3911.19		3078.51	742.34	814.191		0.976948	0.723021	0.825824		0.976948	0.723021	0.825824
	0.78	15196.9	4819.14	3862.38		3151.15	909.24	765.378		1	0.885577	0.776314		1	0.885577	0.776314
	0.845	14946.4	4860.74	3725.52		2900.73	950.84	628.518		0.920531	0.926095	0.637498		0.920531	0.926095	0.637498
	0.91	14798.4	4936.62	3621.51		2752.74	1026.72	524.508		0.873567	1	0.532002		0.873567	1	0.532002
	0.975	14798.1	4818.87	3534.13		2752.38	908.97	437.126		0.873453	0.885314	0.443372		0.873453	0.885314	0.443372
	1.04	14754.5	4771.14	3521.81		2708.85	861.24	424.809		0.859639	0.838827	0.430879		0.859639	0.838827	0.430879
	1.105	14658.3	4716.81	3531.77		2612.56	806.91	434.77		0.829081	0.78591	0.440982		0.829081	0.78591	0.440982
	1.17	14735.5	4649.47	3470.53		2689.78	739.57	373.534		0.853587	0.720323	0.378871		0.853587	0.720323	0.378871
	1.235	14768.2	4639.12	3471.02		2722.47	729.22	374.017		0.863961	0.710242	0.379361		0.863961	0.710242	0.379361
	1.3	14712.6	4613.27	3401.8		2666.92	703.37	304.805		0.846332	0.685065	0.30916		0.846332	0.685065	0.30916
	1.365	14952.7	4515.58	3432.28		2907.04	605.68	335.282		0.922533	0.589917	0.340073		0.922533	0.589917	0.340073
	1.43	14765.2	4472.71	3534.21		2719.46	562.81	437.206		0.863006	0.548163	0.443453		0.863006	0.548163	0.443453
	1.495	14235.4	4479.79	3514.74		2189.68	569.89	417.745		0.694883	0.555059	0.423714		0.694883	0.555059	0.423714
	1.56	13334.2	4310.22	3650.81		1288.49	400.32	553.812		0.408895	0.389902	0.561725		0.408895	0.389902	0.561725
	1.625	12786.5	4152.22	3691.44		740.85	242.32	594.439		0.235105	0.236014	0.602933		0.235105	0.236014	0.602933
	1.69	12380.9	4000.31	3650.37		335.22	90.41	553.369		0.10638	0.0880571	0.561276		0.10638	0.0880571	0.561276
	1.755	12234	3867.59	3660.03		188.3	-42.31	563.032		0.059756	-0.0412089	0.571077		0.059756	0	0.571077
	1.82	12179	3793.35	3559.09		133.34	-116.55	462.088		0.0423147	-0.113517	0.46869		0.0423147	0	0.46869
	1.885	12162.4	3747.73	3449.35		116.72	-162.17	352.353		0.0370404	-0.15795	0.357388		0.0370404	0	0.357388
	1.95	11851.2	3650.39	3273.66		-194.48	-259.51	176.662		-0.0617172	-0.252756	0.179186		0	0	0.179186
	2.015	11651	3500	3213		-394.7	-409.9	116		-0.125256	-0.399233	0.117657		0	0	0.117657
	Background	12045.7	3909.9	3097	Maximum Value	5730.35	2172.2	1645.59
	0	13807	4727	3846		1761.3	817.1	749		0.307363	0.376162	0.455156		0.307363	0.376162	0.455156
	0.065	13974.3	4782	3761		1928.59	872.1	664		0.336557	0.401482	0.403503		0.336557	0.401482	0.403503
	0.13	14433.6	4735.37	3840.44		2387.88	825.47	743.44		0.416708	0.380016	0.451777		0.416708	0.380016	0.451777
	0.195	14395.9	4864.51	3750.71		2350.18	954.61	653.71		0.410129	0.439467	0.39725		0.410129	0.439467	0.39725
	0.26	13997.6	4942.73	3771.49		1951.88	1032.83	674.49		0.340621	0.475476	0.409877		0.340621	0.475476	0.409877
	0.325	13895.9	5116.59	3843.12		1850.23	1206.69	746.12		0.322883	0.555515	0.453406		0.322883	0.555515	0.453406
	0.39	14186.1	5137.32	4026.66		2140.45	1227.42	929.66		0.373529	0.565058	0.56494		0.373529	0.565058	0.56494
	0.455	14208.7	5104.85	4336		2163.01	1194.95	1239		0.377466	0.55011	0.752921		0.377466	0.55011	0.752921
	0.52	13966.1	5182.93	4268.68		1920.37	1273.03	1171.68		0.335123	0.586056	0.712012		0.335123	0.586056	0.712012
	0.585	14213	5268.37	4441.51		2167.3	1358.47	1344.51		0.378214	0.625389	0.817038		0.378214	0.625389	0.817038
	0.65	14506.8	5417.63	4609.07		2461.08	1507.73	1512.07		0.429482	0.694103	0.918862		0.429482	0.694103	0.918862
	0.715	14637.4	5403.71	4742.59		2591.74	1493.81	1645.59		0.452283	0.687695	1		0.452283	0.687695	1
	0.78	14693.7	5528.85	4438.95		2648.03	1618.95	1341.95		0.462106	0.745304	0.815483		0.462106	0.745304	0.815483
	0.845	14945.9	5656.46	4120.88		2900.15	1746.56	1023.88		0.506103	0.804051	0.622196		0.506103	0.804051	0.622196
	0.91	15159.6	5836.44	3991.8		3113.93	1926.54	894.8		0.54341	0.886907	0.543756		0.54341	0.886907	0.543756
	0.975	15731.3	5808.17	3744.15		3685.64	1898.27	647.15		0.643179	0.873893	0.393263		0.643179	0.873893	0.393263
	1.04	16305	5928.07	3684.88		4259.28	2018.17	587.88		0.743284	0.92909	0.357246		0.743284	0.92909	0.357246
	1.105	17046.8	5931.66	3697.37		5001.13	2021.76	600.37		0.872744	0.930743	0.364836		0.872744	0.930743	0.364836
	1.17	16912.5	6046.24	3567.05		4866.81	2136.34	470.05		0.849304	0.983491	0.285642		0.849304	0.983491	0.285642
	1.235	17548.2	6082.1	3505.88		5502.54	2172.2	408.88		0.960245	1	0.24847		0.960245	1	0.24847
	1.3	17776	5963.73	3463.34		5730.35	2053.83	366.34		1	0.945507	0.222619		1	0.945507	0.222619
	1.365	17492.9	5952.54	3457.71		5447.18	2042.64	360.71		0.950584	0.940355	0.219198		0.950584	0.940355	0.219198
	1.43	17302.9	5991.61	3480.59		5257.23	2081.71	383.59		0.917436	0.958342	0.233102		0.917436	0.958342	0.233102
	1.495	16633.2	5883.88	3393.17		4587.5	1973.98	296.17		0.800562	0.908747	0.179978		0.800562	0.908747	0.179978
	1.56	16306.7	5797.76	3439.37		4260.96	1887.86	342.37		0.743578	0.8691	0.208053		0.743578	0.8691	0.208053
	1.625	15934.7	5999	3357.41		3889.03	2089.1	260.41		0.678672	0.961744	0.158247		0.678672	0.961744	0.158247
	1.69	16174	5890.85	3377.15		4128.28	1980.95	280.15		0.720424	0.911956	0.170243		0.720424	0.911956	0.170243
	1.755	15418.4	5776.2	3491.66		3372.69	1866.3	394.66		0.588566	0.859175	0.239829		0.588566	0.859175	0.239829
	1.82	14902.2	5461.24	3631.95		2856.47	1551.34	534.95		0.498481	0.714179	0.325081		0.498481	0.714179	0.325081
	1.885	14340	5294.71	3717.54		2294.3	1384.81	620.54		0.400377	0.637515	0.377093		0.400377	0.637515	0.377093
	1.95	14279.3	5167.71	3836.39		2233.59	1257.81	739.39		0.389782	0.579049	0.449316		0.389782	0.579049	0.449316
	2.015	14288.2	4878.15	3870.9		2242.52	968.25	773.9		0.391341	0.445746	0.470287		0.391341	0.445746	0.470287
	2.08	13967.2	4931.9	3984.51		1921.52	1022	887.51		0.335323	0.470491	0.539326		0.335323	0.470491	0.539326
	2.145	14002.2	4821.02	3798.78		1956.52	911.12	701.78		0.341431	0.419446	0.426461		0.341431	0.419446	0.426461
	2.21	14233.3	4748.32	3839.29		2187.62	838.42	742.29		0.38176	0.385977	0.451078		0.38176	0.385977	0.451078
	2.275	14111	4791.41	3719.22		2065.3	881.51	622.22		0.360414	0.405814	0.378114		0.360414	0.405814	0.378114
	2.34	13753.6	4617.32	3590		1707.91	707.42	493		0.298046	0.32567	0.299589		0.298046	0.32567	0.299589
	2.405	13953.9	4648.56	3677.71		1908.15	738.66	580.71		0.33299	0.340052	0.352889		0.33299	0.340052	0.352889
	2.47	13647.4	4710.73	3718.46		1601.67	800.83	621.46		0.279506	0.368672	0.377652		0.279506	0.368672	0.377652
	2.535	13843.4	4776.88	3754.24		1797.74	866.98	657.24		0.313723	0.399125	0.399395		0.313723	0.399125	0.399395
	2.6	14303.6	4739.05	3813.12		2257.88	829.15	716.12		0.394021	0.38171	0.435175		0.394021	0.38171	0.435175
	2.665	14442	4612	3808		2396.3	702.1	711		0.418177	0.323221	0.432064		0.418177	0.323221	0.432064
	HeLa_tetCENPBmCRMI1_STB-MG132_+Dox_BI2536_BLM-RFP-BubR1-15.czi
	Background	11192.5	2304.4	3143.2	Maximum Value	6631.41	1730.73	2576.8
	0	13410	3131	5028		2217.5	826.6	1884.8		0.334393	0.477602	0.73145		0.334393	0.477602	0.73145
	0.065	13728.1	3053.12	5012.4		2535.59	748.72	1869.2		0.382361	0.432604	0.725394		0.382361	0.432604	0.725394
	0.13	13551.5	3040.56	4885.81		2359.04	736.16	1742.61		0.355737	0.425347	0.676269		0.355737	0.425347	0.676269
	0.195	13367.5	3115.5	4909.89		2175.05	811.1	1766.69		0.327992	0.468646	0.685614		0.327992	0.468646	0.685614
	0.26	13208.2	3082.2	4910.84		2015.74	777.8	1767.64		0.303969	0.449406	0.685983		0.303969	0.449406	0.685983
	0.325	13141.2	3077.25	4922		1948.75	772.85	1778.8		0.293867	0.446546	0.690314		0.293867	0.446546	0.690314
	0.39	13473.3	3105.26	5046.97		2280.79	800.86	1903.77		0.343937	0.46273	0.738812		0.343937	0.46273	0.738812
	0.455	13607.4	3161.16	5143.41		2414.88	856.76	2000.22		0.364158	0.495028	0.77624		0.364158	0.495028	0.77624
	0.52	13765.2	3159.84	5339.56		2572.66	855.44	2196.36		0.387951	0.494265	0.85236		0.387951	0.494265	0.85236
	0.585	13964.8	3186.27	5657.85		2772.29	881.87	2514.65		0.418054	0.509536	0.975881		0.418054	0.509536	0.975881
	0.65	14237	3320	5720		3044.5	1015.6	2576.8		0.459103	0.586804	1		0.459103	0.586804	1
	0.715	14346	3464.46	5509.99		3153.55	1160.06	2366.79		0.475547	0.670272	0.9185		0.475547	0.670272	0.9185
	0.78	14671.9	3730.12	5188.02		3479.4	1425.72	2044.82		0.524685	0.823768	0.79355		0.524685	0.823768	0.79355
	0.845	14999.4	3888.78	5037.06		3806.92	1584.38	1893.86		0.574074	0.91544	0.734964		0.574074	0.91544	0.734964
	0.91	15649.2	3982.12	5038.97		4456.75	1677.72	1895.77		0.672067	0.969371	0.735707		0.672067	0.969371	0.735707
	0.975	15482.8	3995.75	4800.12		4290.25	1691.35	1656.93		0.646959	0.977247	0.643017		0.646959	0.977247	0.643017
	1.04	15725.2	4023.24	4967.48		4532.66	1718.84	1824.28		0.683514	0.99313	0.707963		0.683514	0.99313	0.707963
	1.105	16162.1	4035.13	4808.3		4969.62	1730.73	1665.1		0.749406	1	0.646189		0.749406	1	0.646189
	1.17	16354.9	3958.35	4875.83		5162.41	1653.95	1732.63		0.778478	0.955637	0.672396		0.778478	0.955637	0.672396
	1.235	16656.6	3943.01	4974.26		5464.06	1638.61	1831.06		0.823967	0.946774	0.710593		0.823967	0.946774	0.710593
	1.3	16740	3906	4945		5547.5	1601.6	1801.8		0.836549	0.92539	0.699239		0.836549	0.92539	0.699239
	1.365	16562.4	3871.97	4902.02		5369.87	1567.57	1758.82		0.809763	0.905728	0.68256		0.809763	0.905728	0.68256
	1.43	16441.9	3779.12	4848.15		5249.4	1474.72	1704.95		0.791596	0.85208	0.661654		0.791596	0.85208	0.661654
	1.495	16209	3793.27	4833.6		5016.47	1488.87	1690.4		0.756471	0.860255	0.656009		0.756471	0.860255	0.656009
	1.56	16285	3940.2	4989.4		5092.5	1635.8	1846.2		0.767936	0.94515	0.71647		0.767936	0.94515	0.71647
	1.625	16831.8	3865.75	4984.12		5639.25	1561.35	1840.93		0.850385	0.902134	0.714423		0.850385	0.902134	0.714423
	1.69	17244.7	3978.83	5015.09		6052.21	1674.43	1871.89		0.912658	0.96747	0.72644		0.912658	0.96747	0.72644
	1.755	17823.9	3716.79	5105.28		6631.41	1412.39	1962.09		1	0.816066	0.761442		1	0.816066	0.761442
	1.82	17600.2	3831.48	5162.56		6407.7	1527.08	2019.36		0.966265	0.882333	0.78367		0.966265	0.882333	0.78367
	1.885	16558.1	3586.59	5369.54		5365.62	1282.19	2226.34		0.809122	0.740838	0.863994		0.809122	0.740838	0.863994
	1.95	14961.5	3348.75	5557.75		3769	1044.35	2414.55		0.568356	0.603416	0.937034		0.568356	0.603416	0.937034
	2.015	14414.7	3195	5438.07		3222.21	890.6	2294.87		0.485901	0.514581	0.890589		0.485901	0.514581	0.890589
	2.08	13968.7	3133.96	5325.84		2776.18	829.56	2182.64		0.418641	0.479312	0.847035		0.418641	0.479312	0.847035
	2.145	13967.5	3063.02	5240.93		2775.04	758.62	2097.73		0.418469	0.438324	0.814081		0.418469	0.438324	0.814081
	2.21	14250	3006.89	5163.55		3057.5	702.49	2020.35		0.461063	0.405892	0.784054		0.461063	0.405892	0.784054
	2.275	14595.4	2979	5058.5		3402.88	674.6	1915.3		0.513146	0.389778	0.743286		0.513146	0.389778	0.743286
	2.34	15230.6	2958.8	5109.36		4038.06	654.4	1966.16		0.608929	0.378106	0.763024		0.608929	0.378106	0.763024
	2.405	15431.7	2927.61	5107.82		4239.19	623.21	1964.62		0.639259	0.360085	0.762428		0.639259	0.360085	0.762428
	2.47	14908.7	2924.43	5087.7		3716.17	620.03	1944.5		0.560389	0.358248	0.754618		0.560389	0.358248	0.754618
	2.535	13767.9	2839.13	5080.94		2575.42	534.73	1937.74		0.388367	0.308962	0.751995		0.388367	0.308962	0.751995
	2.6	13936	2856	5160		2743.5	551.6	2016.8		0.413713	0.318709	0.782676		0.413713	0.318709	0.782676
	Background	11192.5	2304.4	3143.2	Maximum Value	5661.81	1321.4	2393.28
	0	12014	2522	4391		821.5	217.6	1247.8		0.145095	0.164674	0.521377		0.145095	0.164674	0.521377
	0.065	12230.7	2637.32	4405.22		1038.21	332.92	1262.02		0.183371	0.251945	0.527318		0.183371	0.251945	0.527318
	0.13	12590.4	2641.89	4664.91		1397.87	337.49	1521.71		0.246895	0.255403	0.635826		0.246895	0.255403	0.635826
	0.195	12800.6	2612.27	4747.37		1608.12	307.87	1604.17		0.284029	0.232988	0.670281		0.284029	0.232988	0.670281
	0.26	13065	2705.53	4881.4		1872.45	401.13	1738.2		0.330716	0.303564	0.726284		0.330716	0.303564	0.726284
	0.325	13431.6	2744.2	5051.67		2239.13	439.8	1908.47		0.39548	0.332829	0.797429		0.39548	0.332829	0.797429
	0.39	13386	2832.55	5320.65		2193.51	528.15	2177.45		0.387422	0.39969	0.909818		0.387422	0.39969	0.909818
	0.455	13433	2860.55	5463.61		2240.47	556.15	2320.41		0.395716	0.420879	0.969552		0.395716	0.420879	0.969552
	0.52	13549.8	2922.11	5536.48		2357.33	617.71	2393.28		0.416356	0.467466	1		0.416356	0.467466	1
	0.585	13776.5	3035.36	5369.52		2584.05	730.96	2226.32		0.4564	0.553171	0.930238		0.4564	0.553171	0.930238
	0.65	14105.7	3154.91	5286.26		2913.22	850.51	2143.06		0.514539	0.643643	0.895449		0.514539	0.643643	0.895449
	0.715	14045.7	3164.33	5159		2853.17	859.93	2015.8		0.503932	0.650772	0.842275		0.503932	0.650772	0.842275
	0.78	13678.1	3386.05	5036.51		2485.64	1081.65	1893.31		0.439019	0.818564	0.791094		0.439019	0.818564	0.791094
	0.845	13907.5	3464	4914.66		2715.05	1159.6	1771.46		0.479537	0.877554	0.740181		0.479537	0.877554	0.740181
	0.91	14502.6	3625.8	4735.53		3310.12	1321.4	1592.33		0.58464	1	0.665334		0.58464	1	0.665334
	0.975	15747.9	3486.88	4692.42		4555.44	1182.48	1549.22		0.804591	0.894869	0.647321		0.804591	0.894869	0.647321
	1.04	16600.5	3506.45	4707.45		5408	1202.05	1564.25		0.955172	0.909679	0.653601		0.955172	0.909679	0.653601
	1.105	16854.3	3507.83	4773.19		5661.81	1203.43	1629.99		1	0.910723	0.681069		1	0.910723	0.681069
	1.17	16378.6	3419.31	4759.15		5186.08	1114.91	1615.95		0.915976	0.843734	0.675203		0.915976	0.843734	0.675203
	1.235	15617.4	3501.58	4713.41		4424.85	1197.18	1570.21		0.781526	0.905994	0.656091		0.781526	0.905994	0.656091
	1.3	15083	3596.37	4784.47		3890.51	1291.97	1641.27		0.68715	0.977728	0.685783		0.68715	0.977728	0.685783
	1.365	15127.2	3526.74	4996.36		3934.71	1222.34	1853.16		0.694956	0.925034	0.774318		0.694956	0.925034	0.774318
	1.43	14982	3565.67	5082		3789.5	1261.27	1938.8		0.669309	0.954495	0.810102		0.669309	0.954495	0.810102
	1.495	14652.3	3568.91	5107.76		3459.83	1264.51	1964.56		0.611082	0.956947	0.820865		0.611082	0.956947	0.820865
	1.56	14197.4	3429.47	5215.55		3004.89	1125.07	2072.35		0.53073	0.851423	0.865904		0.53073	0.851423	0.865904
	1.625	13741.1	3157.32	5143.54		2548.65	852.92	2000.34		0.450148	0.645467	0.835815		0.450148	0.645467	0.835815
	1.69	13407.2	2889.87	5071.46		2214.73	585.47	1928.26		0.39117	0.443068	0.805698		0.39117	0.443068	0.805698
	1.755	12931.2	2743.81	4963.6		1738.73	439.41	1820.4		0.307098	0.332534	0.76063		0.307098	0.332534	0.76063
	1.82	12675.8	2601.45	4676.3		1483.3	297.05	1533.1		0.261983	0.224799	0.640585		0.261983	0.224799	0.640585
	1.885	12697.6	2633.79	4609.58		1505.12	329.39	1466.38		0.265837	0.249273	0.612707		0.265837	0.249273	0.612707
	1.95	12561	2543.36	4678.17		1368.45	238.96	1534.97		0.241698	0.180839	0.641367		0.241698	0.180839	0.641367
	2.015	12482.7	2520.93	4579.13		1290.19	216.53	1435.93		0.227876	0.163864	0.599984		0.227876	0.163864	0.599984
	2.08	12456	2565.62	4613.87		1263.5	261.22	1470.67		0.223162	0.197684	0.6145		0.223162	0.197684	0.6145
	2.145	12433	2545	4648		1240.5	240.6	1504.8		0.2191	0.18208	0.628761		0.2191	0.18208	0.628761
	Background	11192.5	2304.4	3143.2	Maximum Value	5671.34	1736.09	2234.94
	0	13035	2827	4547		1842.5	522.6	1403.8		0.324879	0.301021	0.628115		0.324879	0.301021	0.628115
	0.065	12933.9	2889.43	4467.68		1741.4	585.03	1324.48		0.307053	0.336981	0.592626		0.307053	0.336981	0.592626
	0.13	12737.9	2950.73	4585.66		1545.41	646.33	1442.47		0.272495	0.372291	0.645416		0.272495	0.372291	0.645416
	0.195	12682.1	2849.8	4724.63		1489.56	545.4	1581.43		0.262647	0.314154	0.707594		0.262647	0.314154	0.707594
	0.26	12729.9	2903.03	4643.42		1537.42	598.63	1500.22		0.271086	0.344815	0.671256		0.271086	0.344815	0.671256
	0.325	12891	2938.16	4742.92		1698.52	633.76	1599.72		0.299492	0.36505	0.715778		0.299492	0.36505	0.715778
	0.39	13056.4	2853.53	4978.77		1863.91	549.13	1835.57		0.328654	0.316303	0.821308		0.328654	0.316303	0.821308
	0.455	13153.6	2898.03	5158.18		1961.07	593.63	2014.98		0.345786	0.341935	0.901579		0.345786	0.341935	0.901579
	0.52	13318.8	3065.12	5223.33		2126.25	760.72	2080.13		0.374911	0.43818	0.930731		0.374911	0.43818	0.930731
	0.585	13704	3245.36	5282.42		2511.5	940.96	2139.22		0.442841	0.542	0.957172		0.442841	0.542	0.957172
	0.65	14075.2	3436.65	5202.23		2882.67	1132.25	2059.03		0.508287	0.652184	0.921289		0.508287	0.652184	0.921289
	0.715	14101.4	3671.52	5022.59		2908.94	1367.12	1879.39		0.512919	0.787471	0.840913		0.512919	0.787471	0.840913
	0.78	14181.8	3861.01	4984.88		2989.32	1556.61	1841.68		0.527092	0.896618	0.82404		0.527092	0.896618	0.82404
	0.845	14773.7	3952.2	4883.11		3581.24	1647.8	1739.91		0.631463	0.949144	0.778506		0.631463	0.949144	0.778506
	0.91	14850.6	3971.62	4727.45		3658.11	1667.22	1584.25		0.645017	0.96033	0.708854		0.645017	0.96033	0.708854
	0.975	15186.1	4007.77	4644.38		3993.61	1703.37	1501.18		0.704174	0.981153	0.671686		0.704174	0.981153	0.671686
	1.04	15600.7	4040.49	4616.35		4408.21	1736.09	1473.15		0.777278	1	0.659143		0.777278	1	0.659143
	1.105	15766.8	3918.75	4626.79		4574.25	1614.35	1483.59		0.806555	0.929877	0.663816		0.806555	0.929877	0.663816
	1.17	16123.2	3931.19	4628.63		4930.67	1626.79	1485.43		0.869401	0.937042	0.664642		0.869401	0.937042	0.664642
	1.235	16101.5	3906	4671.5		4909	1601.6	1528.3		0.86558	0.922533	0.683821		0.86558	0.922533	0.683821
	1.3	15939.1	3803.89	4747.83		4746.59	1499.49	1604.63		0.836943	0.863717	0.717974		0.836943	0.863717	0.717974
	1.365	15910.2	3743.65	4566.45		4717.72	1439.25	1423.25		0.831853	0.829018	0.636818		0.831853	0.829018	0.636818
	1.43	16109.4	3730	4664.07		4916.92	1425.6	1520.88		0.866977	0.821156	0.680499		0.866977	0.821156	0.680499
	1.495	16197.6	3901.27	4786.79		5005.15	1596.87	1643.59		0.882534	0.919808	0.735408		0.882534	0.919808	0.735408
	1.56	16226.9	3811.48	4814.59		5034.37	1507.08	1671.39		0.887686	0.868089	0.747846		0.887686	0.868089	0.747846
	1.625	16631.2	3906.18	4820.89		5438.7	1601.78	1677.69		0.95898	0.922636	0.750666		0.95898	0.922636	0.750666
	1.69	16863.8	3711.7	4861.2		5671.34	1407.3	1718.01		1	0.810615	0.768703		1	0.810615	0.768703
	1.755	16502.7	3750.15	5043.77		5310.23	1445.75	1900.57		0.936327	0.832762	0.850392		0.936327	0.832762	0.850392
	1.82	15812.9	3410.58	5268.48		4620.44	1106.18	2125.28		0.8147	0.637167	0.950935		0.8147	0.637167	0.950935
	1.885	14800.7	3278.52	5378.14		3608.24	974.12	2234.94		0.636224	0.5611	1		0.636224	0.5611	1
	1.95	14108.2	3088.27	5326.45		2915.72	783.87	2183.25		0.514115	0.451515	0.97687		0.514115	0.451515	0.97687
	2.015	13504.7	2940.41	5198.09		2312.2	636.01	2054.89		0.407699	0.366346	0.919437		0.407699	0.366346	0.919437
	2.08	13502	2894.56	4982.19		2309.46	590.16	1838.99		0.407216	0.339936	0.822837		0.407216	0.339936	0.822837
	2.145	13700	2796.33	4868.21		2507.51	491.93	1725.01		0.442137	0.283355	0.771839		0.442137	0.283355	0.771839
	2.21	13395.2	2722.27	4947.39		2202.69	417.87	1804.19		0.38839	0.240696	0.807267		0.38839	0.240696	0.807267
	2.275	13387.1	2713.62	4905.35		2194.65	409.22	1762.15		0.386972	0.235714	0.788456		0.386972	0.235714	0.788456
	2.34	12979.9	2706.22	4886.65		1787.39	401.82	1743.45		0.315162	0.231451	0.780089		0.315162	0.231451	0.780089
	2.405	13224.3	2628.63	4839.26		2031.79	324.23	1696.06		0.358256	0.186759	0.758882		0.358256	0.186759	0.758882
	2.47	13027	2605	4981		1834.5	300.6	1837.8		0.323469	0.173148	0.822304		0.323469	0.173148	0.822304
	Background	11192.5	2304.4	3143.2	Maximum Value	4848.53	1908.44	1756.74
	0	12405	2798	3821		1212.5	493.6	677.8		0.250076	0.258641	0.385828		0.250076	0.258641	0.385828
	0.065	11945.7	2924.98	3833.29		753.18	620.58	690.09		0.155342	0.325177	0.392824		0.155342	0.325177	0.392824
	0.13	12068.8	2886.03	3792		876.25	581.63	648.8		0.180725	0.304767	0.36932		0.180725	0.304767	0.36932
	0.195	12230.7	3061.98	3690.31		1038.22	757.58	547.11		0.214131	0.396963	0.311435		0.214131	0.396963	0.311435
	0.26	12123.3	2966.59	3846.78		930.77	662.19	703.58		0.19197	0.34698	0.400503		0.19197	0.34698	0.400503
	0.325	12235	3137.41	4018.64		1042.53	833.01	875.44		0.21502	0.436487	0.498332		0.21502	0.436487	0.498332
	0.39	12240.1	3277.32	4208.67		1047.56	972.92	1065.47		0.216057	0.509799	0.606504		0.216057	0.509799	0.606504
	0.455	12914.9	3307.44	4389.65		1722.35	1003.04	1246.45		0.355231	0.525581	0.709524		0.355231	0.525581	0.709524
	0.52	13345.2	3498.6	4453.8		2152.66	1194.2	1310.6		0.443982	0.625747	0.746041		0.443982	0.625747	0.746041
	0.585	13519.6	3599.23	4445.35		2327.11	1294.83	1302.15		0.479962	0.678476	0.741231		0.479962	0.678476	0.741231
	0.65	13672.6	3671.44	4430.81		2480.12	1367.04	1287.61		0.51152	0.716313	0.732954		0.51152	0.716313	0.732954
	0.715	13951.2	3809.85	4330.42		2758.67	1505.45	1187.22		0.56897	0.788838	0.675809		0.56897	0.788838	0.675809
	0.78	14246	3954.16	4161.79		3053.47	1649.76	1018.59		0.629772	0.864455	0.579818		0.629772	0.864455	0.579818
	0.845	14481.9	3943.24	3981.23		3289.4	1638.84	838.03		0.678432	0.858733	0.477037		0.678432	0.858733	0.477037
	0.91	14440.3	4009.2	3879.08		3247.8	1704.8	735.88		0.669853	0.893295	0.41889		0.669853	0.893295	0.41889
	0.975	14421.6	4061.48	3711.86		3229.08	1757.08	568.66		0.665992	0.920689	0.323702		0.665992	0.920689	0.323702
	1.04	14470.2	4085.84	3701.96		3277.66	1781.44	558.76		0.676011	0.933454	0.318066		0.676011	0.933454	0.318066
	1.105	14336.1	4123.03	3678.62		3143.58	1818.63	535.42		0.648357	0.952941	0.30478		0.648357	0.952941	0.30478
	1.17	14172.4	4047.8	3616.29		2979.89	1743.4	473.09		0.614597	0.913521	0.2693		0.614597	0.913521	0.2693
	1.235	14190.2	4035.07	3566.5		2997.7	1730.67	423.3		0.61827	0.906851	0.240958		0.61827	0.906851	0.240958
	1.3	14397.5	4019	3533		3205	1714.6	389.8		0.661025	0.89843	0.221888		0.661025	0.89843	0.221888
	1.365	14625.9	4025.2	3620.61		3433.36	1720.8	477.41		0.708124	0.901679	0.271759		0.708124	0.901679	0.271759
	1.43	14912.5	4046.2	3677.73		3719.97	1741.8	534.53		0.767237	0.912683	0.304274		0.767237	0.912683	0.304274
	1.495	15161.9	4047.64	3671.11		3969.38	1743.24	527.91		0.818677	0.913437	0.300505		0.818677	0.913437	0.300505
	1.56	15279	4138.96	3771.56		4086.54	1834.56	628.36		0.842841	0.961288	0.357685		0.842841	0.961288	0.357685
	1.625	15440.6	4131.89	3840.81		4248.06	1827.49	697.61		0.876154	0.957583	0.397105		0.876154	0.957583	0.397105
	1.69	15801.5	4038.51	3944.5		4608.97	1734.11	801.3		0.950591	0.908653	0.456129		0.950591	0.908653	0.456129
	1.755	16041	4062.7	4237.32		4848.53	1758.3	1094.12		1	0.921328	0.622813		1	0.921328	0.622813
	1.82	15844.2	4212.84	4431.03		4651.66	1908.44	1287.83		0.959396	1	0.733079		0.959396	1	0.733079
	1.885	15543.9	4039.29	4781.19		4351.4	1734.89	1637.99		0.897468	0.909062	0.932403		0.897468	0.909062	0.932403
	1.95	14830.7	3865.75	4899.94		3638.19	1561.35	1756.74		0.75037	0.818129	1		0.75037	0.818129	1
	2.015	14473	3758.52	4880.54		3280.51	1454.12	1737.34		0.676599	0.761942	0.988957		0.676599	0.761942	0.988957
	2.08	14735.5	3687.32	4772.56		3543.02	1382.92	1629.36		0.730741	0.724634	0.927491		0.730741	0.724634	0.927491
	2.145	14408.2	3675.84	4575.81		3215.73	1371.44	1432.61		0.663238	0.718618	0.815493		0.663238	0.718618	0.815493
	2.21	14574	3719.34	4557.37		3381.46	1414.94	1414.17		0.69742	0.741412	0.804997		0.69742	0.741412	0.804997
	2.275	14755.6	3557.09	4264.84		3563.06	1252.69	1121.64		0.734874	0.656395	0.638478		0.734874	0.656395	0.638478
	2.34	14585.1	3430.5	4351.09		3392.59	1126.1	1207.89		0.699715	0.590063	0.687575		0.699715	0.590063	0.687575
	2.405	14447.6	3424.25	4278.67		3255.14	1119.85	1135.47		0.671366	0.586788	0.646351		0.671366	0.586788	0.646351
	2.47	14671.8	3427.82	4310.04		3479.29	1123.42	1166.84		0.717597	0.588659	0.664208		0.717597	0.588659	0.664208
	2.535	14514.1	3389.91	4315.97		3321.62	1085.51	1172.77		0.685078	0.568794	0.667583		0.685078	0.568794	0.667583
	2.6	14286	3344	4381		3093.5	1039.6	1237.8		0.638028	0.544738	0.704601		0.638028	0.544738	0.704601
	Background	11192.5	2304.4	3143.2	Maximum Value	4566.62	1252.38	2200.14
	0	12807	3351	3815		1614.5	1046.6	671.8		0.353544	0.835688	0.305344		0.353544	0.835688	0.305344
	0.065	12838	3242.62	3905.28		1645.46	938.223	762.08		0.360323	0.749151	0.346378		0.360323	0.749151	0.346378
	0.13	12799.3	3293.72	3808.43		1606.81	989.325	665.23		0.35186	0.789955	0.302358		0.35186	0.789955	0.302358
	0.195	12971.6	3234.76	3833.49		1779.1	930.361	690.29		0.389588	0.742874	0.313748		0.389588	0.742874	0.313748
	0.26	13008.7	3167.5	3834.92		1816.24	863.1	691.72		0.397721	0.689167	0.314398		0.397721	0.689167	0.314398
	0.325	12823.8	3054	3851.22		1631.28	749.6	708.02		0.357218	0.59854	0.321807		0.357218	0.59854	0.321807
	0.39	12899.1	3116.62	4038.88		1706.57	812.22	895.68		0.373705	0.648541	0.407101		0.373705	0.648541	0.407101
	0.455	12754.4	3195.84	4281.04		1561.92	891.44	1137.84		0.34203	0.711796	0.517167		0.34203	0.711796	0.517167
	0.52	12998.3	3179.56	4417.76		1805.78	875.16	1274.56		0.39543	0.698797	0.579309		0.39543	0.698797	0.579309
	0.585	13324.2	3347.35	4638.48		2131.67	1042.95	1495.28		0.466794	0.832771	0.679629		0.466794	0.832771	0.679629
	0.65	14111	3380.25	4979.88		2918.5	1075.85	1836.68		0.639094	0.859044	0.834801		0.639094	0.859044	0.834801
	0.715	14809.5	3368.86	4963.78		3617.05	1064.46	1820.58		0.792063	0.849947	0.827484		0.792063	0.849947	0.827484
	0.78	14947.2	3484.88	4630.56		3754.74	1180.48	1487.36		0.822214	0.942589	0.67603		0.822214	0.942589	0.67603
	0.845	15042.6	3453.35	4428.65		3850.09	1148.95	1285.45		0.843094	0.91741	0.584258		0.843094	0.91741	0.584258
	0.91	14979.1	3509.86	4400.27		3786.59	1205.46	1257.07		0.829189	0.962535	0.571359		0.829189	0.962535	0.571359
	0.975	15396.3	3556.78	4253.31		4203.84	1252.38	1110.11		0.920558	1	0.504563		0.920558	1	0.504563
	1.04	15759.1	3475.32	4273.72		4566.62	1170.92	1130.52		1	0.934955	0.51384		1	0.934955	0.51384
	1.105	15498.6	3470.38	4318.99		4306.1	1165.98	1175.79		0.942951	0.931011	0.534416		0.942951	0.931011	0.534416
	1.17	14857.2	3470.72	4017.1		3664.66	1166.32	873.9		0.802488	0.931286	0.397202		0.802488	0.931286	0.397202
	1.235	14064.9	3300.37	4103.36		2872.35	995.969	960.16		0.628988	0.79526	0.436409		0.628988	0.79526	0.436409
	1.3	13624.5	3269	4057		2432	964.6	913.8		0.53256	0.770213	0.415337		0.53256	0.770213	0.415337
	1.365	13655.2	3304.67	4013		2462.75	1000.27	869.8		0.539294	0.798692	0.395338		0.539294	0.798692	0.395338
	1.43	13650.3	3299.95	4078.44		2457.83	995.555	935.24		0.538216	0.79493	0.425082		0.538216	0.79493	0.425082
	1.495	13873.8	3354.06	4303.32		2681.33	1049.66	1160.12		0.587159	0.838132	0.527294		0.587159	0.838132	0.527294
	1.56	14075	3362.92	4279.72		2882.5	1058.52	1136.52		0.631211	0.845206	0.516567		0.631211	0.845206	0.516567
	1.625	14154.8	3356.91	4454.81		2962.28	1052.51	1311.61		0.648681	0.840404	0.596148		0.648681	0.840404	0.596148
	1.69	13934.1	3400.26	4721.2		2741.56	1095.86	1578		0.600348	0.875025	0.717227		0.600348	0.875025	0.717227
	1.755	13494.7	3399.59	4919.39		2302.22	1095.19	1776.19		0.504141	0.874487	0.807308		0.504141	0.874487	0.807308
	1.82	13457.2	3215.76	5343.34		2264.74	911.36	2200.14		0.495934	0.727702	1		0.495934	0.727702	1
	1.885	13606.6	3222.41	5138.69		2414.08	918.015	1995.49		0.528636	0.733016	0.906983		0.528636	0.733016	0.906983
	1.95	13120.4	3098.12	5093.5		1927.88	793.725	1950.3		0.422168	0.633773	0.886444		0.422168	0.633773	0.886444
	2.015	12938	3005.1	4996.71		1745.45	700.696	1853.51		0.382219	0.559491	0.842451		0.382219	0.559491	0.842451
	2.08	12626.2	2865.76	4715.68		1433.7	561.36	1572.48		0.313952	0.448234	0.714718		0.313952	0.448234	0.714718
	2.145	12677.3	2756.79	4576.96		1484.79	452.389	1433.76		0.32514	0.361223	0.651668		0.32514	0.361223	0.651668
	2.21	12796.5	2737.11	4336.37		1604.04	432.705	1193.17		0.351253	0.345506	0.542315		0.351253	0.345506	0.542315
	2.275	12924.9	2913.78	4407.19		1732.41	609.381	1263.99		0.379364	0.486578	0.574504		0.379364	0.486578	0.574504
	2.34	12840.4	2810.82	4272.4		1647.86	506.42	1129.2		0.360849	0.404366	0.51324		0.360849	0.404366	0.51324
	2.405	12947	2785.28	4319.87		1754.54	480.882	1176.67		0.38421	0.383974	0.534816		0.38421	0.383974	0.534816
	2.47	13089.3	2757.84	4454.44		1896.76	453.445	1311.24		0.415353	0.362066	0.59598		0.415353	0.362066	0.59598
	2.535	13044.6	2797.45	4450.19		1852.09	493.052	1306.99		0.405571	0.393692	0.594049		0.405571	0.393692	0.594049
	2.6	13135	2636	4281		1942.5	331.6	1137.8		0.425369	0.264776	0.517149		0.425369	0.264776	0.517149
	HeLa_tetCENPBmCRMI1_STB-MG132_+Dox_BI2536_BLM-RFP-BubR1-17.czi
	Background	9191	2353.5	2603.6	Maximum Value	5470.41	1655.84	2457.56
	0	10248.8	2872.75	2917.5		1057.75	519.25	313.9		0.193358	0.313587	0.127728		0.193358	0.313587	0.127728
	0.065	10399.6	2899.99	3013.26		1208.61	546.49	409.66		0.220936	0.330038	0.166694		0.220936	0.330038	0.166694
	0.13	10773	2942.2	3120.51		1581.98	588.7	516.91		0.289189	0.35553	0.210335		0.289189	0.35553	0.210335
	0.195	11098.2	3010.43	3429.17		1907.23	656.93	825.57		0.348645	0.396735	0.335931		0.348645	0.396735	0.335931
	0.26	11436.7	2925.43	3809.69		2245.67	571.93	1206.09		0.410512	0.345402	0.490767		0.410512	0.345402	0.490767
	0.325	11237.2	2960.91	4257.07		2046.21	607.41	1653.47		0.374051	0.366829	0.67281		0.374051	0.366829	0.67281
	0.39	11146.1	2997.7	4654.99		1955.14	644.2	2051.39		0.357403	0.389047	0.834726		0.357403	0.389047	0.834726
	0.455	11297.1	2969.76	5009.16		2106.15	616.26	2405.56		0.385008	0.372174	0.978841		0.385008	0.372174	0.978841
	0.52	11321.6	3093.89	5061.16		2130.6	740.39	2457.56		0.389477	0.447139	1		0.389477	0.447139	1
	0.585	11677.7	3297.7	4938.18		2486.7	944.2	2334.58		0.454573	0.570224	0.949958		0.454573	0.570224	0.949958
	0.65	12618.8	3374.52	4833.06		3427.76	1021.02	2229.46		0.6266	0.616618	0.907184		0.6266	0.616618	0.907184
	0.715	13705	3570.43	4714.72		4513.97	1216.93	2111.12		0.825161	0.734932	0.859031		0.825161	0.734932	0.859031
	0.78	14312.5	3634.2	4690.22		5121.53	1280.7	2086.62		0.936224	0.773444	0.849062		0.936224	0.773444	0.849062
	0.845	14190.4	3780.27	4325.76		4999.44	1426.77	1722.16		0.913906	0.861659	0.70076		0.913906	0.861659	0.70076
	0.91	14282.9	3949.3	4273.99		5091.94	1595.8	1670.39		0.930815	0.96374	0.679694		0.930815	0.96374	0.679694
	0.975	13954.9	4009.34	3839.59		4763.85	1655.84	1235.99		0.87084	1	0.502934		0.87084	1	0.502934
	1.04	13567.8	3994.42	3510.92		4376.82	1640.92	907.32		0.80009	0.990989	0.369195		0.80009	0.990989	0.369195
	1.105	13204.9	3916.79	3274.9		4013.93	1563.29	671.3		0.733753	0.944107	0.273157		0.733753	0.944107	0.273157
	1.17	12635.5	3867.69	3153.21		3444.48	1514.19	549.61		0.629657	0.914454	0.223641		0.629657	0.914454	0.223641
	1.235	12773.8	3793.36	2962.19		3582.81	1439.86	358.59		0.654944	0.869565	0.145913		0.654944	0.869565	0.145913
	1.3	13183.3	3756.93	2918		3992.3	1403.43	314.4		0.729799	0.847564	0.127932		0.729799	0.847564	0.127932
	1.365	13780.2	3776.39	2894.77		4589.18	1422.89	291.17		0.83891	0.859316	0.118479		0.83891	0.859316	0.118479
	1.43	14524.4	3764.57	2784.69		5333.43	1411.07	181.09		0.97496	0.852178	0.0736869		0.97496	0.852178	0.0736869
	1.495	14661.4	3803.4	2816.05		5470.41	1449.9	212.45		1	0.875628	0.0864475		1	0.875628	0.0864475
	1.56	14479	3774.73	2833.98		5287.99	1421.23	230.38		0.966653	0.858314	0.0937434		0.966653	0.858314	0.0937434
	1.625	14533.9	3727.48	2914.79		5342.93	1373.98	311.19		0.976696	0.829778	0.126626		0.976696	0.829778	0.126626
	1.69	14649.3	3625.33	3107.45		5458.3	1271.83	503.85		0.997786	0.768087	0.20502		0.997786	0.768087	0.20502
	1.755	14426.2	3624.61	3404.56		5235.2	1271.11	800.96		0.957003	0.767653	0.325917		0.957003	0.767653	0.325917
	1.82	13378.9	3439	3628.18		4187.9	1085.5	1024.58		0.765555	0.655559	0.416909		0.765555	0.655559	0.416909
	1.885	12641.4	3341.95	3826.06		3450.38	988.45	1222.46		0.630735	0.596948	0.497428		0.630735	0.596948	0.497428
	1.95	11397.3	3150.64	3930.51		2206.29	797.14	1326.91		0.403313	0.481411	0.53993		0.403313	0.481411	0.53993
	2.015	10862.2	3005.3	3924.36		1671.19	651.8	1320.76		0.305496	0.393637	0.537427		0.305496	0.393637	0.537427
	2.08	10580.9	2904.76	3850.86		1389.85	551.26	1247.26		0.254067	0.332919	0.50752		0.254067	0.332919	0.50752
	2.145	10518.2	2789.09	3686.31		1327.16	435.59	1082.71		0.242607	0.263063	0.440563		0.242607	0.263063	0.440563
	2.21	10722.4	2637.41	3492.27		1531.41	283.91	888.67		0.279944	0.17146	0.361607		0.279944	0.17146	0.361607
	2.275	10481.7	2556.26	3235.81		1290.73	202.76	632.21		0.235948	0.122451	0.257251		0.235948	0.122451	0.257251
	2.34	10197.9	2509.77	3038.72		1006.89	156.27	435.12		0.184061	0.0943751	0.177054		0.184061	0.0943751	0.177054
	2.405	9789.59	2436.15	2969.4		598.59	82.65	365.8		0.109423	0.0499142	0.148847		0.109423	0.0499142	0.148847
	2.47	9754.29	2468.34	2880.46		563.29	114.84	276.86		0.10297	0.0693545	0.112656		0.10297	0.0693545	0.112656
	2.535	9851.74	2379.12	2888.82		660.74	25.62	285.22		0.120784	0.0154725	0.116058		0.120784	0.0154725	0.116058
	2.6	10158.8	2409.89	2884.85		967.77	56.39	281.25		0.17691	0.0340552	0.114443		0.17691	0.0340552	0.114443
	2.665	10434.2	2385.75	2915.25		1243.25	32.25	311.65		0.227268	0.0194765	0.126813		0.227268	0.0194765	0.126813
	Background	9191	2353.5	2603.6	Maximum Value	7946.9	1608.62	1585.43
	0	11720.5	2775.5	3650.5		2529.5	422	1046.9		0.3183	0.262337	0.660324		0.3183	0.262337	0.660324
	0.065	11661.2	2798.77	3632.02		2470.17	445.27	1028.42		0.310834	0.276802	0.648666		0.310834	0.276802	0.648666
	0.13	11709.6	2858.29	3601.4		2518.56	504.79	997.802		0.316924	0.313803	0.629356		0.316924	0.313803	0.629356
	0.195	11935	2832.66	3628.65		2743.96	479.16	1025.05		0.345287	0.29787	0.64654		0.345287	0.29787	0.64654
	0.26	12138.3	2914.22	3844.89		2947.26	560.72	1241.29		0.370869	0.348572	0.782935		0.370869	0.348572	0.782935
	0.325	12512.4	2917.46	3905.43		3321.35	563.96	1301.83		0.417943	0.350586	0.821121		0.417943	0.350586	0.821121
	0.39	12464.6	2974.14	4186.46		3273.62	620.64	1582.86		0.411937	0.385821	0.998377		0.411937	0.385821	0.998377
	0.455	12761.6	3012.02	4189.03		3570.64	658.52	1585.43		0.449312	0.40937	1		0.449312	0.40937	1
	0.52	12839.2	3104.29	4084.67		3648.19	750.79	1481.07		0.459071	0.466729	0.934176		0.459071	0.466729	0.934176
	0.585	13032.5	3159.03	3982.57		3841.5	805.53	1378.97		0.483396	0.500758	0.869776		0.483396	0.500758	0.869776
	0.65	13092.6	3228.15	3889.24		3901.56	874.65	1285.64		0.490954	0.543727	0.81091		0.490954	0.543727	0.81091
	0.715	13410.4	3340.86	3900.6		4219.42	987.36	1297		0.530952	0.613793	0.818073		0.530952	0.613793	0.818073
	0.78	13886.5	3489.26	3943.89		4695.45	1135.76	1340.3		0.590853	0.706046	0.845381		0.590853	0.706046	0.845381
	0.845	14506	3582	3728.85		5315.03	1228.5	1125.25		0.668818	0.763698	0.709742		0.668818	0.763698	0.709742
	0.91	14896.3	3698.45	3676.79		5705.31	1344.95	1073.19		0.717929	0.836089	0.676908		0.717929	0.836089	0.676908
	0.975	15088	3758.21	3479.21		5896.95	1404.71	875.613		0.742044	0.873239	0.552286		0.742044	0.873239	0.552286
	1.04	15355.3	3765.8	3378.3		6164.33	1412.3	774.701		0.77569	0.877958	0.488637		0.77569	0.877958	0.488637
	1.105	15426.8	3838.41	3349.48		6235.75	1484.91	745.884		0.784677	0.923096	0.470461		0.784677	0.923096	0.470461
	1.17	15370.2	3832.8	3332.37		6179.23	1479.3	728.766		0.777565	0.919608	0.459664		0.777565	0.919608	0.459664
	1.235	15450.2	3865.88	3314.25		6259.25	1512.38	710.65		0.787634	0.940172	0.448237		0.787634	0.940172	0.448237
	1.3	15408.3	3935.89	3226.68		6217.3	1582.39	623.081		0.782355	0.983694	0.393004		0.782355	0.983694	0.393004
	1.365	15105.4	3936.44	3236.03		5914.38	1582.94	632.433		0.744237	0.984036	0.398902		0.744237	0.984036	0.398902
	1.43	14940.7	3962.12	3282		5749.71	1608.62	678.4		0.723516	1	0.427896		0.723516	1	0.427896
	1.495	14964.6	3788.38	3270.15		5773.61	1434.88	666.548		0.726524	0.891994	0.42042		0.726524	0.891994	0.42042
	1.56	15010.7	3875.65	3260.92		5819.67	1522.15	657.324		0.73232	0.946246	0.414602		0.73232	0.946246	0.414602
	1.625	15314	3910.56	3398.05		6123.03	1557.06	794.452		0.770493	0.967948	0.501095		0.770493	0.967948	0.501095
	1.69	16327.1	3902.57	3557.74		7136.06	1549.07	954.14		0.897968	0.962981	0.601817		0.897968	0.962981	0.601817
	1.755	17137.9	3933.57	3814.06		7946.9	1580.07	1210.46		1	0.982252	0.76349		1	0.982252	0.76349
	1.82	16912.2	3868.74	3944.64		7721.17	1515.24	1341.04		0.971595	0.94195	0.845848		0.971595	0.94195	0.845848
	1.885	16330.2	3846.96	4089.37		7139.17	1493.46	1485.77		0.898359	0.928411	0.93714		0.898359	0.928411	0.93714
	1.95	15395.4	3787.63	3986.96		6204.44	1434.13	1383.36		0.780737	0.891528	0.872545		0.780737	0.891528	0.872545
	2.015	14933.6	3666	3816.69		5742.56	1312.5	1213.09		0.722616	0.815917	0.765147		0.722616	0.815917	0.765147
	2.08	14542.6	3604.86	3766.01		5351.56	1251.36	1162.41		0.673415	0.777909	0.73318		0.673415	0.777909	0.73318
	2.145	14141.6	3384.33	3793.05		4950.62	1030.83	1189.45		0.622962	0.640816	0.750234		0.622962	0.640816	0.750234
	2.21	13822.4	3273.96	3852.09		4631.37	920.46	1248.49		0.58279	0.572205	0.787473		0.58279	0.572205	0.787473
	2.275	13640.8	3208.44	3762.6		4449.84	854.94	1159		0.559947	0.531474	0.731033		0.559947	0.531474	0.731033
	2.34	13487.3	3160.44	3588.45		4296.27	806.94	984.847		0.540622	0.501635	0.621185		0.540622	0.501635	0.621185
	2.405	13976.3	3209.09	3682.64		4785.26	855.59	1079.04		0.602154	0.531878	0.680593		0.602154	0.531878	0.680593
	2.47	14174	3235	3700		4983	881.5	1096.4		0.627037	0.547985	0.691546		0.627037	0.547985	0.691546
	Background	9191	2353.5	2603.6	Maximum Value	7805.34	1062.26	781.085
	0	10811	2593	3178.5		1620	239.5	574.9		0.20755	0.225462	0.736027		0.20755	0.225462	0.736027
	0.065	10890.7	2592.25	3225.5		1699.74	238.753	621.9		0.217766	0.224759	0.7962		0.217766	0.224759	0.7962
	0.13	10807.4	2557.32	3230.49		1616.38	203.823	626.889		0.207086	0.191877	0.802587		0.207086	0.191877	0.802587
	0.195	10906	2598.26	3227.45		1715.03	244.755	623.85		0.219725	0.230409	0.798697		0.219725	0.230409	0.798697
	0.26	10776.7	2571.32	3062.04		1585.7	217.815	458.44		0.203156	0.205048	0.586927		0.203156	0.205048	0.586927
	0.325	10693.7	2608.12	3058.83		1502.67	254.617	455.228		0.192518	0.239693	0.582815		0.192518	0.239693	0.582815
	0.39	10838.2	2637.85	3104.94		1647.22	284.349	501.338		0.211038	0.267683	0.641848		0.211038	0.267683	0.641848
	0.455	10895.1	2680.78	3086.45		1704.08	327.282	482.851		0.218322	0.308099	0.61818		0.218322	0.308099	0.61818
	0.52	11121.2	2665.16	3259.2		1930.16	311.66	655.6		0.247287	0.293393	0.839345		0.247287	0.293393	0.839345
	0.585	11175.4	2735.9	3297.84		1984.44	382.402	694.237		0.254241	0.359989	0.888811		0.254241	0.359989	0.888811
	0.65	11281.9	2799.41	3370.72		2090.94	445.906	767.119		0.267886	0.419771	0.98212		0.267886	0.419771	0.98212
	0.715	11620.3	2920.26	3333.56		2429.27	566.759	729.96		0.311232	0.53354	0.934546		0.311232	0.53354	0.934546
	0.78	12185.8	3047.91	3212.69		2994.75	694.415	609.09		0.38368	0.653714	0.7798		0.38368	0.653714	0.7798
	0.845	12930.2	3047.41	2998.03		3739.24	693.914	394.431		0.479062	0.653242	0.504978		0.479062	0.653242	0.504978
	0.91	13692.4	3227.8	2780.32		4501.37	874.299	176.725		0.576704	0.823055	0.226256		0.576704	0.823055	0.226256
	0.975	14617.5	3339.23	2667.37		5426.51	985.734	63.767		0.69523	0.927958	0.081639		0.69523	0.927958	0.081639
	1.04	14831.8	3207.98	2665.34		5640.82	854.48	61.74		0.722687	0.804397	0.0790439		0.722687	0.804397	0.0790439
	1.105	14714.1	3248.58	2643.55		5523.08	895.082	39.953		0.707603	0.84262	0.0511506		0.707603	0.84262	0.0511506
	1.17	14038.5	3122.89	2651.3		4847.51	769.386	47.701		0.62105	0.724291	0.0610702		0.62105	0.724291	0.0610702
	1.235	13778.4	3029.05	2586.08		4587.39	675.55	-17.522		0.587725	0.635955	-0.0224329		0.587725	0.635955	0
	1.3	13832.2	2955.75	2572.25		4641.25	602.25	-31.35		0.594625	0.566951	-0.0401365		0.594625	0.566951	0
	1.365	14024.3	2914.87	2562.41		4833.26	561.368	-41.192		0.619225	0.528465	-0.0527369		0.619225	0.528465	0
	1.43	13816	2868.15	2659.7		4625.05	514.653	56.1		0.592549	0.484488	0.0718232		0.592549	0.484488	0.0718232
	1.495	13390.2	2898.99	2722.57		4199.2	545.485	118.968		0.537991	0.513513	0.152311		0.537991	0.513513	0.152311
	1.56	13059.6	2958.16	2771.64		3868.6	604.66	168.04		0.495635	0.56922	0.215137		0.495635	0.56922	0.215137
	1.625	12821.6	3013.19	2950.66		3630.56	659.688	347.064		0.465138	0.621023	0.444336		0.465138	0.621023	0.444336
	1.69	12950.8	2988.46	2967.04		3759.84	634.964	363.444		0.481701	0.597748	0.465307		0.481701	0.597748	0.465307
	1.755	13648.9	3153.47	3048.03		4457.94	799.965	444.431		0.57114	0.753078	0.568992		0.57114	0.753078	0.568992
	1.82	14895.6	3184.45	3234.44		5704.61	830.95	630.84		0.73086	0.782247	0.807646		0.73086	0.782247	0.807646
	1.885	16353.9	3410.34	3384.68		7162.91	1056.84	781.085		0.917694	0.9949	1		0.917694	0.9949	1
	1.95	16996.3	3415.03	3298.03		7805.34	1061.53	694.431		1	0.999313	0.889059		1	0.999313	0.889059
	2.015	16531.6	3415.76	3265.33		7340.6	1062.26	661.732		0.940459	1	0.847196		0.940459	1	0.847196
	2.08	15036	3364.28	3160.9		5845.02	1010.78	557.3		0.748849	0.951536	0.713495		0.748849	0.951536	0.713495
	2.145	13367.7	3220.89	3069.39		4176.68	867.387	465.789		0.535105	0.816548	0.596336		0.535105	0.816548	0.596336
	2.21	12321	3114.93	2906		3130.04	761.434	302.396		0.401013	0.716805	0.387149		0.401013	0.716805	0.387149
	2.275	11703	3076.52	2739.95		2512.05	723.023	136.345		0.321837	0.680645	0.174558		0.321837	0.680645	0.174558
	2.34	11741.5	3062.51	2675.28		2550.49	709.015	71.685		0.326762	0.667458	0.0917762		0.326762	0.667458	0.0917762
	2.405	11758.7	3013.39	2583.03		2567.68	659.889	-20.571		0.328965	0.621212	-0.0263364		0.328965	0.621212	0
	2.47	11773.8	2950.92	2551.11		2582.78	597.424	-52.494		0.330899	0.562408	-0.0672065		0.330899	0.562408	0
	2.535	11462.4	3003.49	2549.82		2271.35	649.989	-53.781		0.290999	0.611892	-0.0688542		0.290999	0.611892	0
	2.6	11364	3029	2629		2173	675.5	25.4		0.278399	0.635908	0.0325189		0.278399	0.635908	0.0325189
	Background	9191	2353.5	2603.6	Maximum Value	9195.16	2188.17	1668.28
	0	13167	3358	3358		3976	1004.5	754.4		0.432401	0.459059	0.452201		0.432401	0.459059	0.452201
	0.065	13640.6	3380.77	3485.23		4449.58	1027.27	881.634		0.483905	0.469465	0.528468		0.483905	0.469465	0.528468
	0.13	13807.5	3297.42	3515.93		4616.53	943.92	912.334		0.502061	0.431374	0.54687		0.502061	0.431374	0.54687
	0.195	14469.8	3408.21	3592.76		5278.83	1054.71	989.164		0.574088	0.482006	0.592923		0.574088	0.482006	0.592923
	0.26	14757.1	3486.95	3739.37		5566.11	1133.45	1135.77		0.60533	0.51799	0.680803		0.60533	0.51799	0.680803
	0.325	15617.8	3612.97	4043.36		6426.82	1259.47	1439.76		0.698935	0.575581	0.863017		0.698935	0.575581	0.863017
	0.39	16001.7	3770.49	4265.48		6810.69	1416.99	1661.88		0.740682	0.647569	0.996161		0.740682	0.647569	0.996161
	0.455	16379.6	3793.12	4271.88		7188.57	1439.62	1668.28		0.781778	0.65791	1		0.781778	0.65791	1
	0.52	16548.2	4093.82	4112.45		7357.19	1740.32	1508.85		0.800115	0.795331	0.90443		0.800115	0.795331	0.90443
	0.585	16889.2	4366.57	3865.22		7698.21	2013.07	1261.62		0.837202	0.919979	0.75624		0.837202	0.919979	0.75624
	0.65	17421.5	4409.7	3726.43		8230.48	2056.2	1122.84		0.895088	0.939689	0.673048		0.895088	0.939689	0.673048
	0.715	17649.5	4541.67	3478		8458.5	2188.17	874.4		0.919886	1	0.524132		0.919886	1	0.524132
	0.78	17627.7	4434.72	3477.86		8436.73	2081.22	874.26		0.917519	0.951124	0.524048		0.917519	0.951124	0.524048
	0.845	17421.8	4491.8	3428.82		8230.85	2138.3	825.224		0.895129	0.977209	0.494655		0.895129	0.977209	0.494655
	0.91	17180.2	4468.61	3544.5		7989.24	2115.11	940.899		0.868853	0.966611	0.563992		0.868853	0.966611	0.563992
	0.975	17993.5	4393.87	3520.83		8802.48	2040.37	917.226		0.957295	0.932455	0.549802		0.957295	0.932455	0.549802
	1.04	18386.2	4393.42	3354.02		9195.16	2039.92	750.419		1	0.932249	0.449815		1	0.932249	0.449815
	1.105	18228.8	4511.9	3329.57		9037.82	2158.4	725.972		0.982889	0.986395	0.435161		0.982889	0.986395	0.435161
	1.17	17548.1	4471.89	3471.64		8357.12	2118.39	868.045		0.908861	0.96811	0.520322		0.908861	0.96811	0.520322
	1.235	17240.2	4406.57	3406.62		8049.22	2053.07	803.016		0.875376	0.938259	0.481343		0.875376	0.938259	0.481343
	1.3	17048.2	4469.01	3468.36		7857.23	2115.51	864.764		0.854496	0.966794	0.518356		0.854496	0.966794	0.518356
	1.365	16385.4	4471.96	3390.99		7194.4	2118.46	787.392		0.782412	0.968142	0.471977		0.782412	0.968142	0.471977
	1.43	15456.3	4423	3297.33		6265.33	2069.5	693.733		0.681373	0.945767	0.415837		0.681373	0.945767	0.415837
	1.495	15082.8	4197.45	3300.03		5891.79	1843.95	696.432		0.640749	0.84269	0.417454		0.640749	0.84269	0.417454
	1.56	14881.2	4011.39	3472.99		5690.21	1657.89	869.392		0.618827	0.757661	0.52113		0.618827	0.757661	0.52113
	1.625	14380.1	3796.3	3657.93		5189.08	1442.8	1054.34		0.564327	0.659364	0.631988		0.564327	0.659364	0.631988
	1.69	13636	3613.56	3891.15		4444.98	1260.06	1287.55		0.483404	0.575851	0.771781		0.483404	0.575851	0.771781
	1.755	13013.4	3393.75	4161.19		3822.38	1040.25	1557.59		0.415695	0.475397	0.933651		0.415695	0.475397	0.933651
	1.82	12510.3	3170.04	4122.38		3319.31	816.54	1518.78		0.360984	0.373161	0.910387		0.360984	0.373161	0.910387
	1.885	12249.3	3135.5	3820.28		3058.27	782	1216.68		0.332596	0.357376	0.729303		0.332596	0.357376	0.729303
	1.95	11866.2	3105.45	3552.74		2675.23	751.95	949.136		0.290939	0.343643	0.56893		0.290939	0.343643	0.56893
	2.015	11813.5	3030.42	3367.42		2622.45	676.92	763.821		0.285199	0.309354	0.457849		0.285199	0.309354	0.457849
	2.08	12065.9	2943.93	3326.3		2874.94	590.43	722.703		0.312658	0.269828	0.433202		0.312658	0.269828	0.433202
	2.145	12264.5	2922.5	3307		3073.5	569	703.4		0.334252	0.260035	0.421631		0.334252	0.260035	0.421631
	Background	9191	2353.5	2603.6	Maximum Value	5402.28	1123.43	1093.12
	0	11154.5	2645.5	2975		1963.5	292	371.4		0.363458	0.259919	0.339761		0.363458	0.259919	0.339761
	0.065	11238.3	2697.14	3052.43		2047.32	343.636	448.832		0.378973	0.305882	0.410596		0.378973	0.305882	0.410596
	0.13	11152.4	2716.24	3273.14		1961.44	362.735	669.536		0.363076	0.322883	0.612499		0.363076	0.322883	0.612499
	0.195	11286.5	2750.33	3498.22		2095.5	396.833	894.622		0.387892	0.353235	0.81841		0.387892	0.353235	0.81841
	0.26	11307.7	2897.36	3688.72		2116.7	543.864	1085.12		0.391816	0.484112	0.992676		0.391816	0.484112	0.992676
	0.325	11544.7	2873.81	3679.01		2353.7	520.309	1075.41		0.435686	0.463145	0.983799		0.435686	0.463145	0.983799
	0.39	11665.7	2982.83	3626		2474.72	629.333	1022.4		0.458088	0.560191	0.935303		0.458088	0.560191	0.935303
	0.455	12329	3042.8	3663.86		3137.99	689.302	1060.26		0.580864	0.613571	0.969936		0.580864	0.613571	0.969936
	0.52	12744.3	3154.37	3421.1		3553.28	800.87	817.499		0.657737	0.712882	0.747857		0.657737	0.712882	0.747857
	0.585	13206.5	3233	3216		4015.5	879.5	612.4		0.743297	0.782873	0.56023		0.743297	0.782873	0.56023
	0.65	13542.7	3262.4	3145.18		4351.67	908.901	541.579		0.805525	0.809044	0.495442		0.805525	0.809044	0.495442
	0.715	13540	3275.57	3039.26		4349.01	922.068	435.665		0.805032	0.820764	0.398551		0.805032	0.820764	0.398551
	0.78	13224.6	3263.72	2988.78		4033.56	910.222	385.178		0.74664	0.81022	0.352365		0.74664	0.81022	0.352365
	0.845	13285.8	3371.05	2997.18		4094.75	1017.55	393.579		0.757967	0.905755	0.36005		0.757967	0.905755	0.36005
	0.91	13356.8	3247.68	2852.65		4165.81	894.179	249.048		0.771121	0.795939	0.227832		0.771121	0.795939	0.227832
	0.975	13305.1	3268.89	2975.39		4114.11	915.389	371.789		0.761551	0.814819	0.340117		0.761551	0.814819	0.340117
	1.04	13085.2	3225.15	3090.44		3894.18	871.654	486.844		0.72084	0.775889	0.44537		0.72084	0.775889	0.44537
	1.105	12898	3221.25	3110.06		3707.01	867.753	506.462		0.686194	0.772417	0.463317		0.686194	0.772417	0.463317
	1.17	12722.5	3116.5	3117		3531.5	763	513.4		0.653705	0.679172	0.469664		0.653705	0.679172	0.469664
	1.235	12549.8	3134.59	3018.26		3358.84	781.086	414.665		0.621745	0.695271	0.37934		0.621745	0.695271	0.37934
	1.3	12830.2	3181.23	2979.74		3639.21	827.729	376.141		0.673643	0.73679	0.344098		0.673643	0.73679	0.344098
	1.365	13259.1	3252.11	3005.83		4068.06	898.611	402.233		0.753026	0.799884	0.367967		0.753026	0.799884	0.367967
	1.43	13958.4	3362.9	3144.92		4767.36	1009.4	541.32		0.882472	0.898502	0.495205		0.882472	0.898502	0.495205
	1.495	14593.3	3399.97	3154.65		5402.28	1046.47	551.048		1	0.931503	0.504105		1	0.931503	0.504105
	1.56	14540.6	3394.72	3104.72		5349.61	1041.22	501.122		0.99025	0.926827	0.458432		0.99025	0.926827	0.458432
	1.625	14288.8	3420.83	3252.22		5097.81	1067.33	648.622		0.94364	0.95007	0.593367		0.94364	0.95007	0.593367
	1.69	13454	3476.93	3438.86		4262.97	1123.43	835.258		0.789106	1	0.764103		0.789106	1	0.764103
	1.755	12876.5	3390.5	3518		3685.5	1037	914.4		0.682212	0.923069	0.836503		0.682212	0.923069	0.836503
	1.82	12420.4	3229.33	3624.88		3229.41	875.827	1021.28		0.597786	0.779604	0.934281		0.597786	0.779604	0.934281
	1.885	11938.7	3075.69	3696.72		2747.73	722.191	1093.12		0.508624	0.642847	1		0.508624	0.642847	1
	1.95	11722.6	2988.33	3606.89		2531.56	634.833	1003.29		0.46861	0.565087	0.91782		0.46861	0.565087	0.91782
	2.015	11747.6	2977.21	3565.23		2556.62	623.71	961.629		0.473248	0.555186	0.879709		0.473248	0.555186	0.879709
	2.08	11571.9	2898.99	3573.49		2380.88	545.488	969.888		0.440718	0.485558	0.887264		0.440718	0.485558	0.887264
	2.145	11387.4	2942.94	3448.39		2196.44	589.444	844.789		0.406576	0.524684	0.772822		0.406576	0.524684	0.772822
	2.21	11377.6	2879.91	3212.26		2186.6	526.414	608.659		0.404755	0.468579	0.556808		0.404755	0.468579	0.556808
	2.275	11446.5	2917.72	3213.41		2255.5	564.222	609.807		0.417509	0.502233	0.557858		0.417509	0.502233	0.557858
	2.34	11473.5	2945	3256.5		2282.5	591.5	652.9		0.422507	0.526514	0.59728		0.422507	0.526514	0.59728
	Background	9191	2353.5	2603.6	Maximum Value	6210.73	1412.71	1772.25
	0	11634	2736.5	3799.5		2443	383	1195.9		0.393352	0.27111	0.674792		0.393352	0.27111	0.674792
	0.065	11768.6	2773.41	3823.88		2577.65	419.91	1220.28		0.415032	0.297237	0.688548		0.415032	0.297237	0.688548
	0.13	11802.7	2817.19	3919.5		2611.7	463.69	1315.9		0.420514	0.328227	0.742502		0.420514	0.328227	0.742502
	0.195	11880	2850.52	3843.16		2689.03	497.02	1239.56		0.432965	0.35182	0.699427		0.432965	0.35182	0.699427
	0.26	12065.7	2861.43	3946.71		2874.74	507.93	1343.11		0.462867	0.359543	0.757856		0.462867	0.359543	0.757856
	0.325	12266.9	2900.96	4095.37		3075.88	547.46	1491.77		0.495253	0.387525	0.841738		0.495253	0.387525	0.841738
	0.39	12651.9	3100.25	4149.71		3460.94	746.75	1546.11		0.557252	0.528594	0.872399		0.557252	0.528594	0.872399
	0.455	12853.8	3259.74	4171.56		3662.82	906.24	1567.96		0.589757	0.64149	0.884728		0.589757	0.64149	0.884728
	0.52	13221.4	3499.54	3981.35		4030.38	1146.04	1377.75		0.648938	0.811235	0.777402		0.648938	0.811235	0.777402
	0.585	14200.9	3538.93	3988.01		5009.92	1185.43	1384.41		0.806656	0.839118	0.78116		0.806656	0.839118	0.78116
	0.65	14837	3488.39	3833.36		5646.05	1134.89	1229.76		0.90908	0.803343	0.693898		0.90908	0.803343	0.693898
	0.715	15254.8	3466.2	3712.88		6063.84	1112.7	1109.28		0.976349	0.787635	0.625916		0.976349	0.787635	0.625916
	0.78	15380.5	3516.36	3619.42		6189.46	1162.86	1015.82		0.996575	0.823141	0.573181		0.996575	0.823141	0.573181
	0.845	15401.7	3565.14	3583.45		6210.73	1211.64	979.85		1	0.857671	0.552885		1	0.857671	0.552885
	0.91	15019.7	3586.12	3565.06		5828.66	1232.62	961.46		0.938482	0.872522	0.542508		0.938482	0.872522	0.542508
	0.975	14790.3	3530.36	3611.07		5599.3	1176.86	1007.47		0.901553	0.833051	0.568469		0.901553	0.833051	0.568469
	1.04	14644.8	3641.22	3586.22		5453.75	1287.72	982.62		0.878117	0.911525	0.554448		0.878117	0.911525	0.554448
	1.105	14363.8	3673.36	3501.75		5172.78	1319.86	898.15		0.832878	0.934275	0.506785		0.832878	0.934275	0.506785
	1.17	14437.1	3725.31	3629.03		5246.12	1371.81	1025.43		0.844687	0.971049	0.578603		0.844687	0.971049	0.578603
	1.235	14034.7	3766.21	3608.16		4843.68	1412.71	1004.56		0.779889	1	0.566827		0.779889	1	0.566827
	1.3	14031	3571.65	3589.68		4839.98	1218.15	986.08		0.779293	0.862279	0.5564		0.779293	0.862279	0.5564
	1.365	14249.7	3595.56	3790.52		5058.66	1242.06	1186.92		0.814503	0.879204	0.669725		0.814503	0.879204	0.669725
	1.43	14414	3558.16	3987.32		5223.04	1204.66	1383.72		0.84097	0.85273	0.78077		0.84097	0.85273	0.78077
	1.495	14230.3	3438.6	4180.8		5039.27	1085.1	1577.2		0.811381	0.768098	0.889942		0.811381	0.768098	0.889942
	1.56	13886.7	3324.23	4351		4695.74	970.73	1747.4		0.756069	0.68714	0.985978		0.756069	0.68714	0.985978
	1.625	13386.8	3263.46	4375.85		4195.77	909.96	1772.25		0.675568	0.644124	1		0.675568	0.644124	1
	1.69	12686.5	3097.84	4350.36		3495.53	744.34	1746.76		0.562821	0.526888	0.985617		0.562821	0.526888	0.985617
	1.755	12237.9	3089.16	4162.93		3046.92	735.66	1559.33		0.49059	0.520744	0.879859		0.49059	0.520744	0.879859
	1.82	12191	2997.94	3764.12		2999.96	644.44	1160.52		0.483029	0.456173	0.654829		0.483029	0.456173	0.654829
	1.885	12171.1	2919.99	3486.64		2980.14	566.49	883.04		0.479837	0.400995	0.498259		0.479837	0.400995	0.498259
	1.95	12233.8	2919.47	3417.68		3042.75	565.97	814.08		0.489918	0.400627	0.459348		0.489918	0.400627	0.459348
	2.015	12020.9	2836.65	3326.57		2829.94	483.15	722.97		0.455653	0.342002	0.407939		0.455653	0.342002	0.407939
	2.08	12127.2	2792.89	3360.9		2936.21	439.39	757.3		0.472764	0.311026	0.42731		0.472764	0.311026	0.42731
	2.145	12247.1	2831.13	3338.02		3056.12	477.63	734.42		0.492071	0.338095	0.4144		0.492071	0.338095	0.4144
	2.21	12170.9	2885.94	3347.43		2979.93	532.44	743.83		0.479804	0.376893	0.419709		0.479804	0.376893	0.419709
	2.275	11916.5	2849.5	3271.5		2725.5	496	667.9		0.438837	0.351098	0.376866		0.438837	0.351098	0.376866

## Sheet: Analysis RO3306
	RO3306
	HeLa_tetCENPBmCRMI1_STB-MG132_+Dox_RO3306_BLM-RFP-BubR1-06.czi
		BLM	CENPB-mCherry-RMI1	BubR1											(IFX>0, X,0)
	Distance (microns)	Gray Value	Gray Value	Gray Value		Background Correction				Normalise to maximum value				Normalise to maximum value
	Background	12909.7	2208	2062.7	Maximum Value	6877.59	1712.45	1602.45		BLM	CENPB-mCherry-RMI1	BubR1		BLM	CENPB-mCherry-RMI1	BubR1
	0	14690.5	2915.5	3061		1780.8	707.5	998.3		0.258928	0.413151	0.622984		0.258928	0.413151	0.622984
	0.065	15145.8	2908.66	3185.23		2236.13	700.66	1122.53		0.325133	0.409156	0.700509		0.325133	0.409156	0.700509
	0.13	15744.1	2869.73	3358.69		2834.4	661.73	1295.99		0.412121	0.386423	0.808755		0.412121	0.386423	0.808755
	0.195	16463.8	2985.44	3488.35		3554.13	777.44	1425.65		0.51677	0.453993	0.889669		0.51677	0.453993	0.889669
	0.26	16929.3	3183.4	3665.15		4019.57	975.4	1602.45		0.584445	0.569593	1		0.584445	0.569593	1
	0.325	17145.8	3233.86	3647.28		4236.15	1025.86	1584.58		0.615935	0.59906	0.988848		0.615935	0.59906	0.988848
	0.39	17222.4	3299.29	3457.85		4312.74	1091.29	1395.15		0.627071	0.637268	0.870636		0.627071	0.637268	0.870636
	0.455	17203.6	3496.72	3256.23		4293.94	1288.72	1193.53		0.624338	0.752559	0.744816		0.624338	0.752559	0.744816
	0.52	17177.5	3617.76	3073.81		4267.83	1409.76	1011.11		0.620541	0.823242	0.630978		0.620541	0.823242	0.630978
	0.585	17473.3	3710.45	2893.35		4563.59	1502.45	830.65		0.663545	0.877369	0.518363		0.663545	0.877369	0.518363
	0.65	17886.9	3693.23	2809.11		4977.2	1485.23	746.41		0.723684	0.867313	0.465793		0.723684	0.867313	0.465793
	0.715	18549.9	3837.35	2780.48		5640.16	1629.35	717.78		0.820078	0.951473	0.447927		0.820078	0.951473	0.447927
	0.78	19281.7	3920.45	2712.15		6371.98	1712.45	649.45		0.926484	1	0.405286		0.926484	1	0.405286
	0.845	19731.4	3842.36	2743.29		6821.71	1634.36	680.59		0.991875	0.954399	0.424718		0.991875	0.954399	0.424718
	0.91	19787.3	3799.87	2772.29		6877.59	1591.87	709.59		1	0.929586	0.442816		1	0.929586	0.442816
	0.975	19442.6	3672.27	2890.51		6532.93	1464.27	827.81		0.949887	0.855073	0.51659		0.949887	0.855073	0.51659
	1.04	19034.3	3689.06	2991.58		6124.64	1481.06	928.88		0.890521	0.864878	0.579662		0.890521	0.864878	0.579662
	1.105	18374.4	3701.74	3058.3		5464.67	1493.74	995.6		0.794562	0.872282	0.621299		0.794562	0.872282	0.621299
	1.17	17685.2	3601.52	3258		4775.48	1393.52	1195.3		0.694354	0.813758	0.74592		0.694354	0.813758	0.74592
	1.235	17013.3	3475.73	3393.38		4103.61	1267.73	1330.68		0.596664	0.740302	0.830403		0.596664	0.740302	0.830403
	1.3	16249.8	3363.13	3425.21		3340.11	1155.13	1362.51		0.485651	0.674548	0.850267		0.485651	0.674548	0.850267
	1.365	15621	3269.56	3452.06		2711.26	1061.56	1389.36		0.394217	0.619907	0.867022		0.394217	0.619907	0.867022
	1.43	15045.2	3141.31	3488.18		2135.54	933.31	1425.48		0.310507	0.545014	0.889563		0.310507	0.545014	0.889563
	1.495	14814.8	2975.41	3430.07		1905.06	767.41	1367.37		0.276995	0.448136	0.8533		0.276995	0.448136	0.8533
	1.56	14572.9	2860.74	3338.95		1663.17	652.74	1276.25		0.241825	0.381173	0.796437		0.241825	0.381173	0.796437
	1.625	14110.5	2784.85	3268.5		1200.82	576.85	1205.8		0.174599	0.336857	0.752473		0.174599	0.336857	0.752473
	1.69	14013.4	2723.84	3100.79		1103.69	515.84	1038.09		0.160476	0.301229	0.647814		0.160476	0.301229	0.647814
	1.755	14037.4	2723.61	2944.2		1127.67	515.61	881.5		0.163963	0.301095	0.550095		0.163963	0.301095	0.550095
	1.82	13789.6	2678.02	2824.56		879.95	470.02	761.86		0.127945	0.274472	0.475434		0.127945	0.274472	0.475434
	1.885	13613.8	2664.04	2665.27		704.14	456.04	602.57		0.102382	0.266309	0.37603		0.102382	0.266309	0.37603
	1.95	13753.5	2734.92	2494.65		843.77	526.92	431.95		0.122684	0.307699	0.269556		0.122684	0.307699	0.269556
	2.015	14023.5	2773.5	2446.25		1113.8	565.5	383.55		0.161946	0.330229	0.239352		0.161946	0.330229	0.239352
	Background	12909.7	2208	2062.7	Maximum Value	7161.84	1391.42	1155.5		1	1	1
	0	13430	2569.5	2659		520.3	361.5	596.3		0.0726489	0.259807	0.516055		0.0726489	0.259807	0.516055
	0.065	13623.4	2571.94	2749.18		713.69	363.94	686.482		0.0996518	0.26156	0.594101		0.0996518	0.26156	0.594101
	0.13	13612.9	2615.18	2952.15		703.19	407.18	889.452		0.0981857	0.292636	0.769757		0.0981857	0.292636	0.769757
	0.195	13653.4	2685.09	2980.55		743.66	477.09	917.845		0.103836	0.34288	0.794329		0.103836	0.34288	0.794329
	0.26	14104.4	2673.98	3218.2		1194.65	465.98	1155.5		0.166808	0.334895	1		0.166808	0.334895	1
	0.325	14518	2801.97	3210.09		1608.3	593.97	1147.39		0.224565	0.42688	0.992985		0.224565	0.42688	0.992985
	0.39	15137.1	2986	3211.09		2227.39	778	1148.39		0.311008	0.559141	0.99385		0.311008	0.559141	0.99385
	0.455	15573.9	3097.48	3095.39		2664.24	889.48	1032.69		0.372005	0.639261	0.893723		0.372005	0.639261	0.893723
	0.52	15845.1	3293.83	3127.85		2935.45	1085.83	1065.15		0.409874	0.780375	0.921809		0.409874	0.780375	0.921809
	0.585	15895.3	3275.91	2979.09		2985.57	1067.91	916.391		0.416872	0.767497	0.793071		0.416872	0.767497	0.793071
	0.65	15952.2	3505.35	2870.92		3042.47	1297.35	808.224		0.424817	0.932393	0.69946		0.424817	0.932393	0.69946
	0.715	16059.3	3406.67	2857.67		3149.63	1198.67	794.967		0.439779	0.861472	0.687987		0.439779	0.861472	0.687987
	0.78	16814.3	3254.68	2788.36		3904.62	1046.68	725.664		0.545198	0.752239	0.62801		0.545198	0.752239	0.62801
	0.845	17748.4	3224.97	2716.12		4838.72	1016.97	653.421		0.675625	0.730886	0.565489		0.675625	0.730886	0.565489
	0.91	19025.1	3217.47	2637.85		6115.38	1009.47	575.148		0.853884	0.725496	0.497749		0.853884	0.725496	0.497749
	0.975	20071.5	3275.45	2610.55		7161.84	1067.45	547.845		1	0.767166	0.474121		1	0.767166	0.474121
	1.04	19853.5	3186.35	2526.56		6943.76	978.35	463.861		0.96955	0.703131	0.401439		0.96955	0.703131	0.401439
	1.105	19086.8	3276.03	2731.39		6177.12	1068.03	668.694		0.862505	0.767583	0.578707		0.862505	0.767583	0.578707
	1.17	18020.3	3320.05	2583.27		5110.57	1112.05	520.573		0.713583	0.79922	0.450519		0.713583	0.79922	0.450519
	1.235	17000.6	3397.27	2579.7		4090.91	1189.27	516.997		0.571209	0.854717	0.447424		0.571209	0.854717	0.447424
	1.3	16078.9	3565.83	2650.56		3169.19	1357.83	587.861		0.442511	0.975859	0.508752		0.442511	0.975859	0.508752
	1.365	15504.6	3473.91	2647.55		2594.94	1265.91	584.845		0.362329	0.909797	0.506142		0.362329	0.909797	0.506142
	1.43	15214.7	3470.83	2618		2304.97	1262.83	555.3		0.32184	0.907584	0.480572		0.32184	0.907584	0.480572
	1.495	14775.5	3599.42	2564		1865.78	1391.42	501.3		0.260517	1	0.433839		0.260517	1	0.433839
	1.56	14754.3	3488.27	2589.59		1844.62	1280.27	526.891		0.257562	0.920118	0.455986		0.257562	0.920118	0.455986
	1.625	14771.3	3500.7	2739.76		1861.63	1292.7	677.058		0.259937	0.929051	0.585945		0.259937	0.929051	0.585945
	1.69	14749.5	3287.71	2949.65		1839.8	1079.71	886.952		0.256889	0.775977	0.767594		0.256889	0.775977	0.767594
	1.755	14747.9	3123.45	2838.18		1838.21	915.45	775.482		0.256667	0.657925	0.671124		0.256667	0.657925	0.671124
	1.82	14600.7	2938.17	3050.7		1690.98	730.17	987.997		0.23611	0.524766	0.855041		0.23611	0.524766	0.855041
	1.885	14862.6	2781.33	2937.3		1952.94	573.33	874.603		0.272687	0.412047	0.756906		0.272687	0.412047	0.756906
	1.95	14564.2	2673.95	3033.55		1654.53	465.95	970.845		0.23102	0.334874	0.840197		0.23102	0.334874	0.840197
	2.015	14484.3	2472.97	2760		1574.63	264.97	697.3		0.219864	0.190431	0.603463		0.219864	0.190431	0.603463
	2.08	14078	2534.94	2817.68		1168.28	326.94	754.982		0.163126	0.234969	0.653383		0.163126	0.234969	0.653383
	2.145	13520	2628	2698		610.3	420	635.3		0.0852155	0.30185	0.549807		0.0852155	0.30185	0.549807
	Background	12909.7	2208	2062.7	Maximum Value	3243.04	1287.41	933.435		1	1	1
	0	13826	2711	2782.5		916.3	503	719.8		0.282544	0.390707	0.77113		0.282544	0.390707	0.77113
	0.065	13704.1	2756.99	2779.61		794.45	548.99	716.915		0.244971	0.42643	0.76804		0.244971	0.42643	0.76804
	0.13	13553.3	2834.95	2766.05		643.64	626.945	703.352		0.198468	0.486982	0.753509		0.198468	0.486982	0.753509
	0.195	13546.6	2776.17	2802.72		636.94	568.169	740.021		0.196402	0.441327	0.792793		0.196402	0.441327	0.792793
	0.26	13710.9	2760.69	2914.41		801.19	552.692	851.705		0.247049	0.429305	0.912442		0.247049	0.429305	0.912442
	0.325	13798	2836.25	2996.14		888.25	628.247	933.435		0.273894	0.487993	1		0.273894	0.487993	1
	0.39	13925.5	2814.17	2913.34		1015.75	606.173	850.643		0.313209	0.470847	0.911304		0.313209	0.470847	0.911304
	0.455	14390.7	2932.89	2853.38		1480.96	724.893	790.683		0.456658	0.563063	0.847068		0.456658	0.563063	0.847068
	0.52	14726	3110.28	2749.34		1816.28	902.285	686.644		0.560055	0.700853	0.73561		0.560055	0.700853	0.73561
	0.585	15034.4	3147.6	2663.25		2124.68	939.6	600.549		0.655151	0.729837	0.643375		0.655151	0.729837	0.643375
	0.65	15522.8	3213.75	2551.97		2613.14	1005.75	489.272		0.805769	0.781223	0.524163		0.805769	0.781223	0.524163
	0.715	15789.2	3207.61	2572.18		2879.48	999.612	509.478		0.887895	0.776452	0.54581		0.887895	0.776452	0.54581
	0.78	16103.6	3197.93	2528.53		3193.93	989.934	465.835		0.984857	0.768935	0.499055		0.984857	0.768935	0.499055
	0.845	16118.8	3166.99	2537.76		3209.11	958.99	475.063		0.989538	0.744899	0.508941		0.989538	0.744899	0.508941
	0.91	16152.7	3292.43	2553.61		3243.04	1084.43	490.913		1	0.842337	0.525921		1	0.842337	0.525921
	0.975	15828.3	3364.22	2532.75		2918.61	1156.22	470.05		0.899961	0.898098	0.50357		0.899961	0.898098	0.50357
	1.04	15466.4	3492.51	2605.39		2556.65	1284.51	542.687		0.78835	0.997744	0.581387		0.78835	0.997744	0.581387
	1.105	15634.5	3426	2556.75		2724.8	1218	494.05		0.840199	0.946086	0.529282		0.840199	0.946086	0.529282
	1.17	15421	3458.5	2478.53		2511.28	1250.5	415.826		0.77436	0.971328	0.445479		0.77436	0.971328	0.445479
	1.235	15248.1	3495.41	2462.27		2338.38	1287.41	399.572		0.721046	1	0.428066		0.721046	1	0.428066
	1.3	15051.4	3410.99	2492.14		2141.73	1202.99	429.438		0.660408	0.934425	0.460062		0.660408	0.934425	0.460062
	1.365	14505.4	3235.15	2507.49		1595.67	1027.15	444.787		0.492029	0.797841	0.476506		0.492029	0.797841	0.476506
	1.43	14590.8	3170.31	2607.44		1681.07	962.308	544.739		0.518362	0.747476	0.583585		0.518362	0.747476	0.583585
	1.495	14691	3049.39	2637.01		1781.29	841.389	574.315		0.549266	0.653552	0.61527		0.549266	0.653552	0.61527
	1.56	14821	3063.03	2775.16		1911.26	855.029	712.464		0.589342	0.664147	0.763271		0.589342	0.664147	0.763271
	1.625	14818.3	3054.98	2716.39		1908.56	846.984	653.685		0.58851	0.657898	0.700301		0.58851	0.657898	0.700301
	1.69	15322.5	3059.84	2865.7		2412.78	851.841	802.999		0.743987	0.66167	0.860262		0.743987	0.66167	0.860262
	1.755	14895.4	2856.02	2825.03		1985.72	648.02	762.329		0.612302	0.503352	0.816692		0.612302	0.503352	0.816692
	1.82	14541.9	2808.75	2708.21		1632.21	600.749	645.513		0.503296	0.466634	0.691546		0.503296	0.466634	0.691546
	1.885	14302.6	2792.9	2755.79		1392.9	584.899	693.09		0.429504	0.454322	0.742516		0.429504	0.454322	0.742516
	1.95	14211.6	2883.95	2634.66		1301.92	675.948	571.964		0.40145	0.525045	0.612752		0.40145	0.525045	0.612752
	2.015	14083.6	2983.69	2613.44		1173.88	775.69	550.741		0.361969	0.60252	0.590015		0.361969	0.60252	0.590015
	2.08	14311.3	2792.04	2539.35		1401.6	584.036	476.653		0.432187	0.453652	0.510644		0.432187	0.453652	0.510644
	2.145	14220.8	2914.94	2501.7		1311.11	706.943	438.995		0.404284	0.54912	0.470301		0.404284	0.54912	0.470301
	2.21	14317	2924	2567		1407.3	716	504.3		0.433945	0.556155	0.540263		0.433945	0.556155	0.540263
	Background	12909.7	2208	2062.7	Maximum Value	5707.4	2164.48	697.687		1	1	1
	0	15363	2810	2559		2453.3	602	496.3		0.429845	0.278127	0.711351		0.429845	0.278127	0.711351
	0.065	15399.5	3039.4	2514.1		2489.8	831.4	451.397		0.436241	0.384111	0.646991		0.436241	0.384111	0.646991
	0.13	15705	3062	2760.39		2795.3	854	697.687		0.489768	0.394552	1		0.489768	0.394552	1
	0.195	15780.5	3420.27	2689.61		2870.8	1212.27	626.913		0.502996	0.560074	0.898559		0.502996	0.560074	0.898559
	0.26	16437.1	3446.71	2621.71		3527.4	1238.71	559.01		0.61804	0.57229	0.801233		0.61804	0.57229	0.801233
	0.325	17053	3687	2562.42		4143.33	1479	499.719		0.725958	0.683305	0.716251		0.725958	0.683305	0.716251
	0.39	17838.9	3906.65	2383.36		4929.2	1698.65	320.655		0.863651	0.784784	0.459597		0.863651	0.784784	0.459597
	0.455	18261	3952	2415.06		5351.27	1744	352.364		0.937602	0.805736	0.505046		0.937602	0.805736	0.505046
	0.52	18235	4114.19	2379.81		5325.27	1906.19	317.106		0.933047	0.880669	0.45451		0.933047	0.880669	0.45451
	0.585	18617.1	4191.29	2277.58		5707.4	1983.29	214.881		1	0.916289	0.307991		1	0.916289	0.307991
	0.65	18364.9	4372.48	2359.13		5455.24	2164.48	296.429		0.955819	1	0.424874		0.955819	1	0.424874
	0.715	18228.1	4170.92	2276.89		5318.4	1962.92	214.187		0.931843	0.906878	0.306996		0.931843	0.906878	0.306996
	0.78	18113.1	4232.35	2155.23		5203.4	2024.35	92.526		0.911694	0.935259	0.132618		0.911694	0.935259	0.132618
	0.845	18563.3	4120.11	2231.21		5653.64	1912.11	168.51		0.990581	0.883404	0.241527		0.990581	0.883404	0.241527
	0.91	18257.1	4005.19	2143.87		5347.43	1797.19	81.171		0.936929	0.83031	0.116343		0.936929	0.83031	0.116343
	0.975	17920.7	3954.65	2196.92		5011.03	1746.65	134.219		0.877988	0.806961	0.192377		0.877988	0.806961	0.192377
	1.04	17589.8	4046.58	2224.61		4680.07	1838.58	161.913		0.82	0.849433	0.232071		0.82	0.849433	0.232071
	1.105	17027.1	3832.06	2239.76		4117.38	1624.06	177.058		0.721411	0.750323	0.253779		0.721411	0.750323	0.253779
	1.17	16886.7	3728.48	2241.16		3977.04	1520.48	178.461		0.696822	0.702469	0.255789		0.696822	0.702469	0.255789
	1.235	16011.1	3614.29	2382.69		3101.41	1406.29	319.994		0.543402	0.649713	0.45865		0.543402	0.649713	0.45865
	1.3	16072.8	3425.9	2360.55		3163.07	1217.9	297.848		0.554205	0.562676	0.426908		0.554205	0.562676	0.426908
	1.365	15241.4	3376.9	2452.95		2331.65	1168.9	390.252		0.408531	0.540037	0.559351		0.408531	0.540037	0.559351
	1.43	14596	3095.03	2618.61		1686.33	887.03	555.913		0.295464	0.409812	0.796794		0.295464	0.409812	0.796794
	1.495	14122	3017.73	2722.27		1212.3	809.73	659.574		0.212408	0.374099	0.945372		0.212408	0.374099	0.945372
	1.56	13356	2849.97	2660.36		446.3	641.97	597.655		0.0781967	0.296593	0.856623		0.0781967	0.296593	0.856623
	1.625	13291.4	2809.47	2698.29		381.65	601.47	635.59		0.0668693	0.277882	0.910996		0.0668693	0.277882	0.910996
	1.69	12983.5	2700.52	2507.23		73.78	492.52	444.526		0.0129271	0.227547	0.637142		0.0129271	0.227547	0.637142
	1.755	12926.7	2574.27	2621.55		16.99	366.27	558.848		0.00297684	0.169218	0.801001		0.00297684	0.169218	0.801001
	1.82	12921.7	2799.19	2450.81		11.98	591.19	388.106		0.00209903	0.273133	0.556275		0.00209903	0.273133	0.556275
	1.885	12571.1	2634.45	2449.03		-338.59	426.45	386.332		-0.0593247	0.197022	0.553733		0	0.197022	0.553733
	1.95	12590.3	2558	2411.45		-319.44	350	348.752		-0.0559694	0.161702	0.499869		0	0.161702	0.499869
	2.015	13083.5	2676	2396.5		173.8	468	333.8		0.0304517	0.216218	0.478438		0.0304517	0.216218	0.478438
	Background	12909.7	2208	2062.7	Maximum Value	3748.23	1554.59	758.096		1	1	1
	0	14221	2614	2648		1311.3	406	585.3		0.349845	0.261162	0.772066		0.349845	0.261162	0.772066
	0.065	14375	2678.26	2665.83		1465.3	470.26	603.133		0.390931	0.302498	0.795589		0.390931	0.302498	0.795589
	0.13	14698.5	2591.49	2592.12		1788.78	383.49	529.42		0.477233	0.246682	0.698355		0.477233	0.246682	0.698355
	0.195	14538.1	2748.81	2732.79		1628.45	540.81	670.092		0.434458	0.34788	0.883914		0.434458	0.34788	0.883914
	0.26	15469.8	2865.17	2820.8		2560.11	657.17	758.096		0.683018	0.422729	1		0.683018	0.422729	1
	0.325	15432.2	2957.47	2756.9		2522.49	749.47	694.198		0.672982	0.482101	0.915713		0.672982	0.482101	0.915713
	0.39	15783.2	2982.92	2800.92		2873.47	774.92	738.217		0.766621	0.498472	0.973778		0.766621	0.498472	0.973778
	0.455	16250.5	3111.29	2802.99		3340.79	903.29	740.295		0.891298	0.581047	0.976519		0.891298	0.581047	0.976519
	0.52	16571.7	3252.96	2632.74		3662.04	1044.96	570.041		0.977005	0.672177	0.751938		0.977005	0.672177	0.751938
	0.585	16584.9	3399.5	2549.69		3675.18	1191.5	486.988		0.980511	0.76644	0.642383		0.980511	0.76644	0.642383
	0.65	16657.9	3570.82	2483.59		3748.23	1362.82	420.893		1	0.876643	0.555197		1	0.876643	0.555197
	0.715	16342.6	3762.59	2434.15		3432.91	1554.59	371.446		0.915875	1	0.489972		0.915875	1	0.489972
	0.78	15818.2	3739.67	2271.83		2908.47	1531.67	209.133		0.775958	0.985257	0.275866		0.775958	0.985257	0.275866
	0.845	16073.2	3693.39	2202		3163.54	1485.39	139.3		0.844009	0.955487	0.18375		0.844009	0.955487	0.18375
	0.91	16141.9	3543.44	2190.81		3232.15	1335.44	128.106		0.862314	0.85903	0.168984		0.862314	0.85903	0.168984
	0.975	16039	3479.29	2177.69		3129.28	1271.29	114.988		0.834869	0.817765	0.15168		0.834869	0.817765	0.15168
	1.04	15742.5	3557.59	2133.15		2832.78	1349.59	70.448		0.755765	0.868132	0.0929275		0.755765	0.868132	0.0929275
	1.105	15630.7	3473.66	2138.46		2721.01	1265.66	75.758		0.725945	0.814144	0.0999319		0.725945	0.814144	0.0999319
	1.17	15312.2	3495.5	2077.75		2402.55	1287.5	15.05		0.640983	0.828193	0.0198524		0.640983	0.828193	0.0198524
	1.235	15448.3	3548.95	2129.37		2538.63	1340.95	66.67		0.677288	0.862575	0.087944		0.677288	0.862575	0.087944
	1.3	14936.8	3423.72	2068.17		2027.1	1215.72	5.467		0.540815	0.78202	0.00721149		0.540815	0.78202	0.00721149
	1.365	14590.7	3447.71	2083.83		1680.99	1239.71	21.133		0.448476	0.797451	0.0278764		0.448476	0.797451	0.0278764
	1.43	14314.1	3335.45	2142.5		1404.41	1127.45	79.8		0.374686	0.725239	0.105264		0.374686	0.725239	0.105264
	1.495	14027.2	3413.24	2111.08		1117.55	1205.24	48.376		0.298154	0.775278	0.0638125		0.298154	0.775278	0.0638125
	1.56	13735	3438.67	2056		825.3	1230.67	-6.7		0.220184	0.791636	-0.00883793		0.220184	0.791636	0
	1.625	13528.3	3362.56	2085.71		618.64	1154.56	23.008		0.165049	0.742678	0.0303497		0.165049	0.742678	0.0303497
	1.69	13022	3224.68	2200.77		112.28	1016.68	138.069		0.0299555	0.653986	0.182126		0.0299555	0.653986	0.182126
	1.755	12589.8	3133.69	2262.38		-319.95	925.69	199.675		-0.0853603	0.595456	0.26339		0	0.595456	0.26339
	1.82	12435.4	3062.7	2440.15		-474.27	854.7	377.448		-0.126532	0.549791	0.497889		0	0.549791	0.497889
	1.885	12088	2953.18	2472.96		-821.66	745.18	410.258		-0.219213	0.479342	0.541169		0	0.479342	0.541169
	1.95	11904.4	2958.25	2349.58		-1005.28	750.25	286.883		-0.268201	0.482603	0.378426		0	0.482603	0.378426
	2.015	11550	2810.32	2299.54		-1359.73	602.32	236.837		-0.362766	0.387446	0.31241		0	0.387446	0.31241
	2.08	11453.3	2647.7	2137.44		-1456.37	439.7	74.744		-0.388549	0.28284	0.0985944		0	0.28284	0.0985944
	2.145	11503.5	2621.38	1992		-1406.24	413.38	-70.7		-0.375174	0.265909	-0.09326		0	0.265909	0
	2.21	11181	2631.65	1959.92		-1728.66	423.65	-102.783		-0.461194	0.272516	-0.13558		0	0.272516	0
	2.275	11039.6	2607.54	1948.5		-1870.14	399.54	-114.2		-0.498939	0.257007	-0.150641		0	0.257007	0
	2.34	11192	2540.5	1911.5		-1717.7	332.5	-151.2		-0.45827	0.213883	-0.199447		0	0.213883	0
	HeLa_tetCENPBmCRMI1_STB-MG132_+Dox_RO3306_BLM-RFP-BubR1-08.czi													0	0	0
	Background	9761	2260.3	1952.7	Maximum Value	4908.67	3389.75	1938.05		1	1	1
	0	10503.2	3385.88	2725.25		742.19	1125.58	772.55		0.1512	0.332054	0.398622		0.1512	0.332054	0.398622
	0.065	10479.7	3407.2	2745.49		718.67	1146.9	792.79		0.146408	0.338344	0.409066		0.146408	0.338344	0.409066
	0.13	10534.1	3455.41	2838.56		773.09	1195.11	885.86		0.157495	0.352566	0.457088		0.157495	0.352566	0.457088
	0.195	10700.4	3553.6	2996.21		939.37	1293.3	1043.51		0.19137	0.381533	0.538433		0.19137	0.381533	0.538433
	0.26	11104	3658.44	3165.25		1342.96	1398.14	1212.55		0.273589	0.412461	0.625655		0.273589	0.412461	0.625655
	0.325	11709	3790.56	3360.38		1948.05	1530.26	1407.68		0.396859	0.451437	0.726338		0.396859	0.451437	0.726338
	0.39	12228.3	4006.31	3369.48		2467.26	1746.01	1416.78		0.502633	0.515085	0.731034		0.502633	0.515085	0.731034
	0.455	12614.1	4052.6	3333.3		2853.13	1792.3	1380.6		0.581243	0.528741	0.712366		0.581243	0.528741	0.712366
	0.52	12638.2	4179.17	3245.77		2877.23	1918.87	1293.07		0.586153	0.56608	0.667202		0.586153	0.56608	0.667202
	0.585	12528.3	4457.53	3217.63		2767.32	2197.23	1264.93		0.563762	0.648198	0.652682		0.563762	0.648198	0.652682
	0.65	12480.2	4682.22	3180.08		2719.2	2421.92	1227.38		0.553959	0.714483	0.633307		0.553959	0.714483	0.633307
	0.715	12429.5	4897.84	3045.8		2668.54	2637.54	1093.1		0.543638	0.778093	0.564021		0.543638	0.778093	0.564021
	0.78	12496.3	5128.02	2964.63		2735.34	2867.72	1011.93		0.557247	0.845997	0.522138		0.557247	0.845997	0.522138
	0.845	13230.8	5341.25	2991.54		3469.82	3080.95	1038.84		0.706876	0.908902	0.536023		0.706876	0.908902	0.536023
	0.91	13678.6	5399.52	2807.41		3917.56	3139.22	854.71		0.79809	0.926092	0.441015		0.79809	0.926092	0.441015
	0.975	13925.6	5453.23	2656.75		4164.56	3192.93	704.05		0.848409	0.941937	0.363278		0.848409	0.941937	0.363278
	1.04	13748.6	5559.98	2626.91		3987.57	3299.68	674.21		0.812352	0.973429	0.347881		0.812352	0.973429	0.347881
	1.105	13439.5	5528.3	2579.65		3678.48	3268	626.95		0.749384	0.964083	0.323495		0.749384	0.964083	0.323495
	1.17	13393.2	5538.09	2563.29		3632.21	3277.79	610.59		0.739958	0.966971	0.315054		0.739958	0.966971	0.315054
	1.235	13777.4	5571.41	2625.91		4016.41	3311.11	673.21		0.818228	0.976801	0.347365		0.818228	0.976801	0.347365
	1.3	14273.1	5516.61	2638.24		4512.15	3256.31	685.54		0.91922	0.960634	0.353727		0.91922	0.960634	0.353727
	1.365	14669.7	5523.63	2647.78		4908.67	3263.33	695.08		1	0.962705	0.358649		1	0.962705	0.358649
	1.43	14530.8	5515	2622.56		4769.76	3254.7	669.86		0.971701	0.960159	0.345636		0.971701	0.960159	0.345636
	1.495	14387.8	5558.74	2668.98		4626.8	3298.44	716.28		0.942577	0.973063	0.369588		0.942577	0.973063	0.369588
	1.56	13956.7	5535.14	2752.83		4195.74	3274.84	800.13		0.854761	0.966101	0.412853		0.854761	0.966101	0.412853
	1.625	13669.8	5601.99	2841.03		3908.84	3341.69	888.33		0.796313	0.985822	0.458363		0.796313	0.985822	0.458363
	1.69	13568.6	5650.05	2928.03		3807.64	3389.75	975.33		0.775697	1	0.503253		0.775697	1	0.503253
	1.755	13720.8	5541.41	2977.65		3959.75	3281.11	1024.95		0.806685	0.96795	0.528856		0.806685	0.96795	0.528856
	1.82	13520.2	5317.36	3116.3		3759.24	3057.06	1163.6		0.765837	0.901854	0.600397		0.765837	0.901854	0.600397
	1.885	13203.8	5186.29	3462.72		3442.82	2925.99	1510.02		0.701375	0.863188	0.779144		0.701375	0.863188	0.779144
	1.95	12977.1	4862.83	3793.59		3216.07	2602.53	1840.89		0.655182	0.767765	0.949867		0.655182	0.767765	0.949867
	2.015	12693.2	4504.65	3866.83		2932.25	2244.35	1914.13		0.597361	0.662099	0.987658		0.597361	0.662099	0.987658
	2.08	12271.7	4194.81	3844.24		2510.68	1934.51	1891.54		0.511479	0.570694	0.976002		0.511479	0.570694	0.976002
	2.145	11855.4	3935.79	3890.75		2094.4	1675.49	1938.05		0.426674	0.494281	1		0.426674	0.494281	1
	2.21	11804.6	3743.39	3716.79		2043.65	1483.09	1764.09		0.416335	0.437522	0.91024		0.416335	0.437522	0.91024
	2.275	11511.3	3667.48	3521.75		1750.29	1407.18	1569.05		0.356571	0.415128	0.809602		0.356571	0.415128	0.809602
	2.34	11660.2	3517.67	3426.83		1899.17	1257.37	1474.13		0.386901	0.370933	0.760625		0.386901	0.370933	0.760625
	2.405	11174.2	3414	3317.75		1413.2	1153.7	1365.05		0.287899	0.34035	0.704342		0.287899	0.34035	0.704342
	2.47	11168.5	3236	3413.75		1407.5	975.7	1461.05		0.286738	0.287838	0.753876		0.286738	0.287838	0.753876
	Background	9761	2260.3	1952.7	Maximum Value	3061.56	1872.75	936.769		1	1	1
	0	8045	2657.5	1957.88		-1716	397.2	5.175		-0.560499	0.212095	0.00552431		0	0.212095	0.00552431
	0.065	7992.3	2647.47	1965.97		-1768.7	387.17	13.274		-0.577712	0.206739	0.01417		0	0.206739	0.01417
	0.13	7991.5	2689.39	2030.06		-1769.5	429.09	77.359		-0.577973	0.229123	0.0825807		0	0.229123	0.0825807
	0.195	8102.82	2719.53	2118.86		-1658.18	459.23	166.163		-0.541613	0.245217	0.177379		0	0.245217	0.177379
	0.26	8293.31	2724.97	2244.69		-1467.69	464.67	291.988		-0.479393	0.248122	0.311697		0	0.248122	0.311697
	0.325	8945.38	2800.85	2346.02		-815.62	540.55	393.321		-0.266407	0.28864	0.41987		0	0.28864	0.41987
	0.39	9706.19	2929.16	2397.02		-54.81	668.86	444.323		-0.0179026	0.357154	0.474314		0	0.357154	0.474314
	0.455	10514.6	2964.03	2380.22		753.65	703.73	427.52		0.246165	0.375774	0.456377		0.246165	0.375774	0.456377
	0.52	11636.3	3158.66	2322.91		1875.31	898.36	370.206		0.612534	0.479701	0.395195		0.612534	0.479701	0.395195
	0.585	12347	3334	2292.54		2585.95	1073.7	339.837		0.844651	0.573328	0.362776		0.844651	0.573328	0.362776
	0.65	12565.9	3449.21	2223.65		2804.88	1188.91	270.952		0.91616	0.634847	0.289241		0.91616	0.634847	0.289241
	0.715	12311	3488.27	2171.12		2549.98	1227.97	218.424		0.832902	0.655704	0.233167		0.832902	0.655704	0.233167
	0.78	11887.8	3470.25	2208.69		2126.81	1209.95	255.988		0.694682	0.646082	0.273267		0.694682	0.646082	0.273267
	0.845	11606.5	3518.33	2142.88		1845.45	1258.03	190.177		0.602781	0.671755	0.203014		0.602781	0.671755	0.203014
	0.91	11313.7	3524.35	2129.99		1552.66	1264.05	177.292		0.507147	0.67497	0.189259		0.507147	0.67497	0.189259
	0.975	10834.7	3493.33	2168.07		1073.71	1233.03	215.374		0.350707	0.658406	0.229912		0.350707	0.658406	0.229912
	1.04	10546.6	3503.75	2097.38		785.56	1243.45	144.675		0.256588	0.66397	0.15444		0.256588	0.66397	0.15444
	1.105	10505.1	3586.34	2133.24		744.15	1326.04	180.539		0.243062	0.708071	0.192725		0.243062	0.708071	0.192725
	1.17	10742.8	3608.63	2175.23		981.77	1348.33	222.534		0.320676	0.719973	0.237555		0.320676	0.719973	0.237555
	1.235	11250	3651.08	2147.66		1489.01	1390.78	194.957		0.486357	0.742641	0.208116		0.486357	0.742641	0.208116
	1.3	11754.7	3799.09	2228.03		1993.69	1538.79	275.331		0.651201	0.821674	0.293916		0.651201	0.821674	0.293916
	1.365	12205.9	4038.47	2262.66		2444.91	1778.17	309.958		0.798583	0.949497	0.33088		0.798583	0.949497	0.33088
	1.43	12362	4133.05	2368.98		2601.02	1872.75	416.284		0.849573	1	0.444383		0.849573	1	0.444383
	1.495	12822.6	4030.38	2497.53		3061.56	1770.08	544.827		1	0.945177	0.581602		1	0.945177	0.581602
	1.56	12623.8	3776.03	2680.53		2862.78	1515.73	727.831		0.935072	0.809361	0.776959		0.935072	0.809361	0.776959
	1.625	12163.1	3527.28	2806.55		2402.14	1266.98	853.855		0.784613	0.676535	0.911489		0.784613	0.676535	0.911489
	1.69	11218.4	3335.57	2889.47		1457.38	1075.27	936.769		0.476025	0.574166	1		0.476025	0.574166	1
	1.755	10475.4	3131.3	2781.08		714.39	871	828.384		0.233342	0.465091	0.884299		0.233342	0.465091	0.884299
	1.82	9938.44	3034.25	2682.31		177.44	773.95	729.612		0.0579574	0.413269	0.77886		0.0579574	0.413269	0.77886
	1.885	9608.19	2886.31	2519.5		-152.81	626.01	566.803		-0.0499125	0.334273	0.605062		0	0.334273	0.605062
	1.95	9628.15	2698.72	2371.87		-132.85	438.42	419.167		-0.0433929	0.234105	0.44746		0	0.234105	0.44746
	2.015	9609.77	2674.7	2361.42		-151.23	414.4	408.723		-0.0493964	0.221279	0.436311		0	0.221279	0.436311
	2.08	9728.25	2653.5	2341.75		-32.75	393.2	389.05		-0.0106972	0.209959	0.41531		0	0.209959	0.41531
	Background	9761	2260.3	1952.7	Maximum Value	5650.34	2867.4	987.433		1	1	1
	0	11013	3673	2744.5		1252	1412.7	791.8		0.22158	0.492676	0.801877		0.22158	0.492676	0.801877
	0.065	11041.6	3602.62	2687.25		1280.56	1342.32	734.547		0.226634	0.468131	0.743896		0.226634	0.468131	0.743896
	0.13	11009.3	3665.09	2694.61		1248.31	1404.79	741.909		0.220927	0.489918	0.751351		0.220927	0.489918	0.751351
	0.195	11139.9	3720.4	2759.1		1378.86	1460.1	806.398		0.244031	0.509207	0.816661		0.244031	0.509207	0.816661
	0.26	11212.4	3726.46	2833.29		1451.35	1466.16	880.591		0.256861	0.51132	0.891798		0.256861	0.51132	0.891798
	0.325	11095	3869.23	2805.37		1334.01	1608.93	852.667		0.236094	0.561111	0.863519		0.236094	0.561111	0.863519
	0.39	11099.1	3919.48	2823.74		1338.14	1659.18	871.043		0.236825	0.578636	0.882129		0.236825	0.578636	0.882129
	0.455	11166.1	3957.8	2788.56		1405.12	1697.5	835.86		0.248679	0.592	0.846498		0.248679	0.592	0.846498
	0.52	11067.4	4186.72	2700.06		1306.4	1926.42	747.359		0.231207	0.671835	0.756871		0.231207	0.671835	0.756871
	0.585	11176.2	4364.48	2648.22		1415.21	2104.18	695.515		0.250465	0.733829	0.704367		0.250465	0.733829	0.704367
	0.65	11401.2	4491.18	2603.38		1640.2	2230.88	650.677		0.290283	0.778015	0.658958		0.290283	0.778015	0.658958
	0.715	11454.2	4471.5	2499.8		1693.17	2211.2	547.105		0.299658	0.771152	0.554068		0.299658	0.771152	0.554068
	0.78	11568.3	4670.05	2488.48		1807.27	2409.75	535.776		0.319852	0.840395	0.542595		0.319852	0.840395	0.542595
	0.845	12137.1	4729	2502.28		2376.12	2468.7	549.576		0.420527	0.860954	0.55657		0.420527	0.860954	0.55657
	0.91	12820	4887.48	2520.88		3058.98	2627.18	568.18		0.54138	0.916224	0.575411		0.54138	0.916224	0.575411
	0.975	14248.2	4909.12	2495.33		4487.23	2648.82	542.626		0.794152	0.923771	0.549532		0.794152	0.923771	0.549532
	1.04	15210.9	4895.25	2424.42		5449.87	2634.95	471.723		0.964521	0.918934	0.477727		0.964521	0.918934	0.477727
	1.105	15411.3	4888.46	2465.45		5650.34	2628.16	512.746		1	0.916566	0.519272		1	0.916566	0.519272
	1.17	15137	5079.47	2451.27		5375.95	2819.17	498.574		0.951438	0.98318	0.504919		0.951438	0.98318	0.504919
	1.235	14919.5	5107.26	2481.04		5158.45	2846.96	528.343		0.912945	0.992872	0.535067		0.912945	0.992872	0.535067
	1.3	14726.7	5072.4	2467.02		4965.72	2812.1	514.321		0.878836	0.980714	0.520867		0.878836	0.980714	0.520867
	1.365	14354.3	5127.7	2568.2		4593.32	2867.4	615.5		0.812928	1	0.623333		0.812928	1	0.623333
	1.43	14081.5	5084.81	2611.07		4320.47	2824.51	658.373		0.764639	0.985042	0.666752		0.764639	0.985042	0.666752
	1.495	13705.7	4882.11	2645.23		3944.71	2621.81	692.53		0.698137	0.914351	0.701344		0.698137	0.914351	0.701344
	1.56	13231.1	4701.76	2794.03		3470.08	2441.46	841.333		0.614136	0.851454	0.852041		0.614136	0.851454	0.852041
	1.625	12758.8	4498.03	2940.13		2997.75	2237.73	987.433		0.530543	0.780404	1		0.530543	0.780404	1
	1.69	12224.1	4259.84	2876.74		2463.11	1999.54	924.042		0.435922	0.697336	0.935802		0.435922	0.697336	0.935802
	1.755	12053.4	4035.62	2851.68		2292.38	1775.32	898.976		0.405707	0.619139	0.910417		0.405707	0.619139	0.910417
	1.82	12035.4	3994.1	2788.82		2274.44	1733.8	836.12		0.402532	0.604659	0.846761		0.402532	0.604659	0.846761
	1.885	12026.1	3803.05	2719.39		2265.11	1542.75	766.685		0.40088	0.538031	0.776443		0.40088	0.538031	0.776443
	1.95	11704.1	3748.66	2660.04		1943.08	1488.36	707.341		0.343887	0.519063	0.716343		0.343887	0.519063	0.716343
	2.015	11160.6	3692.23	2648.98		1399.6	1431.93	696.277		0.247702	0.499383	0.705138		0.247702	0.499383	0.705138
	2.08	11009	3657.23	2619.54		1248.05	1396.93	666.844		0.220881	0.487177	0.675331		0.220881	0.487177	0.675331
	2.145	10688.7	3521.78	2555.06		927.73	1261.48	602.36		0.16419	0.439939	0.610026		0.16419	0.439939	0.610026
	2.21	10602.1	3536.91	2536.36		841.11	1276.61	583.665		0.14886	0.445215	0.591093		0.14886	0.445215	0.591093
	2.275	10621	3389.5	2546.5		860	1129.2	593.8		0.152203	0.393806	0.601357		0.152203	0.393806	0.601357
	Background	9761	2260.3	1952.7	Maximum Value	2665.34	2186.81	1938.05		1	1	1
	0	9965.12	3088	2725.25		204.12	827.7	772.55		0.0765831	0.378497	0.398622		0.0765831	0.378497	0.398622
	0.065	10206.9	3123.36	2745.49		445.89	863.06	792.79		0.167292	0.394666	0.409066		0.167292	0.394666	0.409066
	0.13	10262.6	3226.91	2838.56		501.64	966.61	885.86		0.188209	0.442018	0.457088		0.188209	0.442018	0.457088
	0.195	10114.9	3320.09	2996.21		353.94	1059.79	1043.51		0.132794	0.484628	0.538433		0.132794	0.484628	0.538433
	0.26	10122.5	3506.2	3165.25		361.48	1245.9	1212.55		0.135622	0.569734	0.625655		0.135622	0.569734	0.625655
	0.325	10418.2	3682.98	3360.38		657.16	1422.68	1407.68		0.246558	0.650573	0.726338		0.246558	0.650573	0.726338
	0.39	11203.5	3882.41	3369.48		1442.48	1622.11	1416.78		0.541199	0.74177	0.731034		0.541199	0.74177	0.731034
	0.455	11533.4	4042.9	3333.3		1772.35	1782.6	1380.6		0.664962	0.81516	0.712366		0.664962	0.81516	0.712366
	0.52	11490.3	4244.43	3245.77		1729.26	1984.13	1293.07		0.648795	0.907317	0.667202		0.648795	0.907317	0.667202
	0.585	11650.7	4288.84	3217.63		1889.67	2028.54	1264.93		0.708979	0.927625	0.652682		0.708979	0.927625	0.652682
	0.65	12085.4	4404.5	3180.08		2324.4	2144.2	1227.38		0.872084	0.980515	0.633307		0.872084	0.980515	0.633307
	0.715	12034.2	4397.41	3045.8		2273.21	2137.11	1093.1		0.852878	0.977273	0.564021		0.852878	0.977273	0.564021
	0.78	11933.1	4447.11	2964.63		2172.15	2186.81	1011.93		0.814962	1	0.522138		0.814962	1	0.522138
	0.845	11922.2	4402.3	2991.54		2161.18	2142	1038.84		0.810846	0.979509	0.536023		0.810846	0.979509	0.536023
	0.91	11920.2	4312.04	2807.41		2159.22	2051.74	854.71		0.810111	0.938234	0.441015		0.810111	0.938234	0.441015
	0.975	11698.7	4328.47	2656.75		1937.68	2068.17	704.05		0.726992	0.945747	0.363278		0.726992	0.945747	0.363278
	1.04	11414.1	4385.56	2626.91		1653.08	2125.26	674.21		0.620214	0.971854	0.347881		0.620214	0.971854	0.347881
	1.105	11212.6	4284.75	2579.65		1451.57	2024.45	626.95		0.54461	0.925755	0.323495		0.54461	0.925755	0.323495
	1.17	10914.4	4253.6	2563.29		1153.36	1993.3	610.59		0.432725	0.91151	0.315054		0.432725	0.91151	0.315054
	1.235	10979.4	4310.25	2625.91		1218.38	2049.95	673.21		0.45712	0.937416	0.347365		0.45712	0.937416	0.347365
	1.3	11940.4	4235.73	2638.24		2179.43	1975.43	685.54		0.817693	0.903339	0.353727		0.817693	0.903339	0.353727
	1.365	12341.7	4354.56	2647.78		2580.66	2094.26	695.08		0.968229	0.957678	0.358649		0.968229	0.957678	0.358649
	1.43	12426.3	4360.52	2622.56		2665.34	2100.22	669.86		1	0.960404	0.345636		1	0.960404	0.345636
	1.495	11464.5	4299.1	2668.98		1703.47	2038.8	716.28		0.639119	0.932317	0.369588		0.639119	0.932317	0.369588
	1.56	10826.2	4324.79	2752.83		1065.22	2064.49	800.13		0.399656	0.944065	0.412853		0.399656	0.944065	0.412853
	1.625	10331.3	4248.8	2841.03		570.28	1988.5	888.33		0.213961	0.909315	0.458363		0.213961	0.909315	0.458363
	1.69	10181.7	4143.19	2928.03		420.72	1882.89	975.33		0.157849	0.861021	0.503253		0.157849	0.861021	0.503253
	1.755	9996.21	3960.45	2977.65		235.21	1700.15	1024.95		0.0882477	0.777457	0.528856		0.0882477	0.777457	0.528856
	1.82	9784.37	3778.23	3116.3		23.37	1517.93	1163.6		0.00876811	0.69413	0.600397		0.00876811	0.69413	0.600397
	1.885	10027.3	3729.46	3462.72		266.33	1469.16	1510.02		0.0999235	0.671828	0.779144		0.0999235	0.671828	0.779144
	1.95	10533.7	3644.17	3793.59		772.72	1383.87	1840.89		0.289914	0.632826	0.949867		0.289914	0.632826	0.949867
	2.015	10157.2	3565.68	3866.83		396.2	1305.38	1914.13		0.148649	0.596933	0.987658		0.148649	0.596933	0.987658
	2.08	9574.49	3424.92	3844.24		-186.51	1164.62	1891.54		-0.0699761	0.532566	0.976002		0	0.532566	0.976002
	2.145	8896.44	3284.47	3890.75		-864.56	1024.17	1938.05		-0.324371	0.46834	1		0	0.46834	1
	2.21	8771.22	3272.42	3716.79		-989.78	1012.12	1764.09		-0.371352	0.462829	0.91024		0	0.462829	0.91024
	2.275	8838.03	3187.07	3521.75		-922.97	926.77	1569.05		-0.346286	0.4238	0.809602		0	0.4238	0.809602
	2.34	8583.87	3130.37	3426.83		-1177.13	870.07	1474.13		-0.441643	0.397872	0.760625		0	0.397872	0.760625
	2.405	8539.67	3124.53	3317.75		-1221.33	864.23	1365.05		-0.458227	0.395201	0.704342		0	0.395201	0.704342
	2.47	8607.19	3132.69	3413.75		-1153.81	872.39	1461.05		-0.432894	0.398933	0.753876		0	0.398933	0.753876
	HeLa_tetCENPBmCRMI1_STB-MG132_+Dox_RO3306_BLM-RFP-BubR1-15.czi													0	0	0
	Background	9465.5	1989.4	1902.3	Maximum Value	4036.31	1131.6	453.262		1	1	1
	0	8884	2221.5	1802		-581.5	232.1	-100.3		-0.144067	0.205108	-0.221285		0	0.205108	0
	0.065	9106.36	2334.77	1801.61		-359.14	345.366	-100.691		-0.0889773	0.305201	-0.222147		0	0.305201	0
	0.13	9574.22	2304.75	1779.22		108.72	315.35	-123.081		0.0269355	0.278676	-0.271545		0.0269355	0.278676	0
	0.195	9835.98	2426.2	1946.78		370.48	436.803	44.481		0.0917868	0.386005	0.0981353		0.0917868	0.386005	0.0981353
	0.26	9880.25	2365.44	1922.69		414.75	376.038	20.388		0.102755	0.332306	0.0449806		0.102755	0.332306	0.0449806
	0.325	10321.8	2603.59	1939.97		856.28	614.194	37.669		0.212144	0.542766	0.0831065		0.212144	0.542766	0.0831065
	0.39	10274.7	2650.88	2067.03		809.19	661.475	164.731		0.200478	0.584548	0.363434		0.200478	0.584548	0.363434
	0.455	10569.1	2765.47	2007.83		1103.64	776.069	105.528		0.273428	0.685816	0.232819		0.273428	0.685816	0.232819
	0.52	10236.9	2886.75	1987		771.38	897.35	84.7		0.19111	0.792992	0.186868		0.19111	0.792992	0.186868
	0.585	10986.4	2918.09	1975.72		1520.94	928.694	73.419		0.376814	0.820691	0.161979		0.376814	0.820691	0.161979
	0.65	12069.8	2976.56	1981.97		2604.25	987.162	79.669		0.645206	0.872359	0.175768		0.645206	0.872359	0.175768
	0.715	13165.7	2957.77	1781.44		3700.22	968.366	-120.862		0.916733	0.855749	-0.266649		0.916733	0.855749	0
	0.78	13501.8	3121	1752.06		4036.31	1131.6	-150.238		1	1	-0.33146		1	1	0
	0.845	13342.3	2983.33	1820.78		3876.83	993.928	-81.519		0.960489	0.878339	-0.17985		0.960489	0.878339	0
	0.91	12654.7	2947.09	1764.12		3189.16	957.694	-138.175		0.790118	0.846318	-0.304846		0.790118	0.846318	0
	0.975	12640.7	2846.31	1834.86		3175.23	856.912	-67.441		0.786667	0.757257	-0.14879		0.786667	0.757257	0
	1.04	12616.8	2888.25	1831.25		3151.25	898.85	-71.05		0.780725	0.794318	-0.156753		0.780725	0.794318	0
	1.105	12971.8	2804.28	1918.89		3506.33	814.881	16.591		0.868697	0.720114	0.0366036		0.868697	0.720114	0.0366036
	1.17	12448.9	2814.84	1875		2983.38	825.444	-27.3		0.739135	0.729449	-0.0602301		0.739135	0.729449	0
	1.235	12019.1	2682	2005.33		2553.59	692.6	103.028		0.632655	0.612054	0.227303		0.632655	0.612054	0.227303
	1.3	11322.8	2611.88	2042.5		1857.25	622.475	140.2		0.460136	0.550084	0.309313		0.460136	0.550084	0.309313
	1.365	10743.9	2589.05	2211.45		1278.36	599.647	309.153		0.316715	0.529911	0.682062		0.316715	0.529911	0.682062
	1.43	10110.5	2406.19	2281.53		645.03	416.788	379.231		0.159807	0.368317	0.836671		0.159807	0.368317	0.836671
	1.495	10417.4	2445.44	2355.56		951.91	456.038	453.262		0.235837	0.403003	1		0.235837	0.403003	1
	1.56	10637.4	2328	2231.12		1171.88	338.6	328.825		0.290334	0.299222	0.725463		0.290334	0.299222	0.725463
	1.625	10002.5	2293.19	2225.34		537.05	303.788	323.044		0.133055	0.268459	0.712709		0.133055	0.268459	0.712709
	1.69	9804	2345.22	2165.62		338.5	355.819	263.325		0.0838637	0.314439	0.580955		0.0838637	0.314439	0.580955
	1.755	9627.48	2359.8	2064.7		161.98	370.397	162.403		0.0401307	0.327321	0.358298		0.0401307	0.327321	0.358298
	1.82	9324.5	2185.12	2028.12		-141	195.725	125.825		-0.0349329	0.172963	0.277599		0	0.172963	0.277599
	1.885	9232.19	2321.47	1834.09		-233.31	332.069	-68.206		-0.0578028	0.293451	-0.150478		0	0.293451	0
	1.95	9814.59	2362.69	1901.09		349.09	373.288	-1.206		0.0864874	0.329876	-0.00266071		0.0864874	0.329876	0
	2.015	10034.7	2298.3	1807.64		569.16	308.897	-94.659		0.14101	0.272974	-0.208839		0.14101	0.272974	0
	2.08	10154	2324	1913		688.5	334.6	10.7		0.170577	0.295688	0.0236067		0.170577	0.295688	0.0236067
	Background	9465.5	1989.4	1902.3	Maximum Value	4337.12	973.071	322.421		1	1	1		1	1	1
	0	8998.5	2321.25	1812.25		-467	331.85	-90.05		-0.107675	0.341034	-0.279293		0	0.341034	0
	0.065	9057.35	2307.38	1785.77		-408.15	317.982	-116.528		-0.0941062	0.326782	-0.361416		0	0.326782	0
	0.13	9191.76	2308.18	1786.41		-273.74	318.777	-115.888		-0.0631156	0.327599	-0.359431		0	0.327599	0
	0.195	9344.08	2358.61	1855.49		-121.42	369.21	-46.807		-0.0279955	0.379428	-0.145174		0	0.379428	0
	0.26	9671.24	2434.76	1858.78		205.74	445.365	-43.521		0.047437	0.45769	-0.134982		0.047437	0.45769	0
	0.325	10083.3	2502.33	1886.58		617.8	512.931	-15.719		0.142445	0.527126	-0.048753		0.142445	0.527126	0
	0.39	10636.7	2629.53	1950.68		1171.18	640.129	48.377		0.270036	0.657844	0.150043		0.270036	0.657844	0.150043
	0.455	11121.4	2771.12	2006.66		1655.94	781.725	104.362		0.381806	0.803359	0.323682		0.381806	0.803359	0.323682
	0.52	11399	2838.79	2031.23		1933.51	849.394	128.935		0.445805	0.8729	0.399896		0.445805	0.8729	0.399896
	0.585	11437.7	2941.4	2070.14		1972.18	951.997	167.84		0.454721	0.978343	0.520562		0.454721	0.978343	0.520562
	0.65	11258.4	2962.47	2050.76		1792.85	973.071	148.465		0.413373	1	0.460469		0.413373	1	0.460469
	0.715	11480.4	2885.19	1976.1		2014.9	895.791	73.803		0.464571	0.920581	0.228903		0.464571	0.920581	0.228903
	0.78	12300.3	2801.76	1885.68		2834.82	812.365	-16.623		0.653618	0.834847	-0.0515568		0.653618	0.834847	0
	0.845	13330.6	2774.52	1843.68		3865.15	785.122	-58.623		0.891179	0.80685	-0.181821		0.891179	0.80685	0
	0.91	13802.6	2805.03	1832.56		4337.12	815.629	-69.741		1	0.838201	-0.216304		1	0.838201	0
	0.975	13443.3	2727.43	1763.74		3977.77	738.027	-138.557		0.917145	0.758451	-0.429739		0.917145	0.758451	0
	1.04	12925.6	2708.85	1712.38		3460.15	719.453	-189.918		0.797799	0.739363	-0.589037		0.797799	0.739363	0
	1.105	12604.1	2791.75	1762		3138.62	802.35	-140.3		0.723665	0.824554	-0.435145		0.723665	0.824554	0
	1.17	11992.7	2742.24	1857.18		2527.24	752.835	-45.123		0.5827	0.773669	-0.139951		0.5827	0.773669	0
	1.235	11266.9	2695.57	1868.54		1801.4	706.166	-33.756		0.415345	0.725709	-0.104695		0.415345	0.725709	0
	1.3	10772	2729.65	1897.53		1306.49	740.247	-4.771		0.301234	0.760733	-0.0147974		0.301234	0.760733	0
	1.365	10385.5	2715.14	1967.96		920.01	725.74	65.663		0.212125	0.745824	0.203656		0.212125	0.745824	0.203656
	1.43	10280.3	2634.18	2123.74		814.82	644.777	221.435		0.187871	0.662621	0.686788		0.187871	0.662621	0.686788
	1.495	10059.6	2577.15	2200.22		594.09	587.754	297.921		0.136978	0.60402	0.924012		0.136978	0.60402	0.924012
	1.56	9830.6	2531.54	2224.72		365.1	542.144	322.421		0.0841803	0.557147	1		0.0841803	0.557147	1
	1.625	9914.01	2497.77	2213.69		448.51	508.372	311.391		0.103412	0.522441	0.96579		0.103412	0.522441	0.96579
	1.69	9771.03	2428.62	2198.18		305.53	439.218	295.877		0.0704454	0.451373	0.917673		0.0704454	0.451373	0.917673
	1.755	9428.63	2338.07	2198.93		-36.87	348.666	296.634		-0.00850103	0.358315	0.920021		0	0.358315	0.920021
	1.82	9198.32	2338.81	2120.91		-267.18	349.409	218.612		-0.0616031	0.359079	0.678033		0	0.359079	0.678033
	1.885	9075.9	2271.22	2003.34		-389.6	281.821	101.038		-0.0898292	0.28962	0.313373		0	0.28962	0.313373
	1.95	8991.65	2193.85	1897.79		-473.85	204.453	-4.506		-0.109255	0.210111	-0.0139755		0	0.210111	0
	2.015	9011.61	2232.13	1898.32		-453.89	242.732	-3.977		-0.104652	0.249449	-0.0123348		0	0.249449	0
	2.08	9237.74	2310.53	1826.09		-227.76	321.129	-76.212		-0.0525141	0.330016	-0.236374		0	0.330016	0
	2.145	9578.61	2323.83	1773.98		113.11	334.431	-128.322		0.0260795	0.343686	-0.397995		0.0260795	0.343686	0
	2.21	9905	2403	1860		439.5	413.6	-42.3		0.101335	0.425046	-0.131195		0.101335	0.425046	0
	HeLa_tetCENPBmCRMI1_STB-MG132_+Dox_RO3306_BLM-RFP-BubR1-20.czi
	Background	7238.7	3151.6	1412.5	Maximum Value	3372.39	3003.47	649.964		1	1	1
	0	8128.75	5222.25	1628.5		890.05	2070.65	216		0.263923	0.689419	0.332326		0.263923	0.689419	0.332326
	0.065	8591.36	5497.7	1619.11		1352.66	2346.1	206.607		0.401098	0.78113	0.317875		0.401098	0.78113	0.317875
	0.13	8935.54	5553.26	1605.46		1696.84	2401.66	192.958		0.503157	0.799628	0.296875		0.503157	0.799628	0.296875
	0.195	9142.91	5558.47	1683.53		1904.21	2406.87	271.027		0.564647	0.801363	0.416988		0.564647	0.801363	0.416988
	0.26	9253.58	5535.28	1665.62		2014.88	2383.68	253.122		0.597464	0.793642	0.38944		0.597464	0.793642	0.38944
	0.325	9585	5510.85	1713.07		2346.3	2359.25	300.568		0.695738	0.785508	0.462438		0.695738	0.785508	0.462438
	0.39	10188.3	5425.82	1762.25		2949.59	2274.22	349.748		0.874629	0.757198	0.538104		0.874629	0.757198	0.538104
	0.455	10611.1	5450.27	1725.3		3372.39	2298.67	312.8		1	0.765338	0.481257		1	0.765338	0.481257
	0.52	10360.2	5648.34	1628.82		3121.53	2496.74	216.32		0.925614	0.831285	0.332818		0.925614	0.831285	0.332818
	0.585	9850.94	5871.95	1576.25		2612.24	2720.35	163.754		0.774596	0.905736	0.251943		0.774596	0.905736	0.251943
	0.65	9428.75	5747.7	1514.54		2190.05	2596.1	102.044		0.649406	0.864367	0.156999		0.649406	0.864367	0.156999
	0.715	9407	5834	1461.75		2168.3	2682.4	49.25		0.642956	0.8931	0.0757734		0.642956	0.8931	0.0757734
	0.78	9285.61	5785.62	1519.78		2046.91	2634.02	107.281		0.606961	0.876992	0.165057		0.606961	0.876992	0.165057
	0.845	9139.68	5661.48	1519.88		1900.98	2509.88	107.377		0.563689	0.83566	0.165205		0.563689	0.83566	0.165205
	0.91	9392.41	5528.6	1518.46		2153.71	2377	105.958		0.63863	0.791418	0.163021		0.63863	0.791418	0.163021
	0.975	9448.26	5600.3	1476.26		2209.56	2448.7	63.762		0.655191	0.81529	0.0981008		0.655191	0.81529	0.0981008
	1.04	9385.46	5777.38	1473.24		2146.76	2625.78	60.742		0.636569	0.874249	0.0934544		0.636569	0.874249	0.0934544
	1.105	9450.33	5978.15	1492.04		2211.63	2826.55	79.543		0.655805	0.941095	0.122381		0.655805	0.941095	0.122381
	1.17	9736.18	6085.69	1456.01		2497.48	2934.09	43.512		0.740567	0.9769	0.0669452		0.740567	0.9769	0.0669452
	1.235	10206.8	6120.63	1497.26		2968.12	2969.03	84.76		0.880124	0.988533	0.130407		0.880124	0.988533	0.130407
	1.3	10537.3	6155.07	1542.8		3298.56	3003.47	130.297		0.978108	1	0.200468		0.978108	1	0.200468
	1.365	10390.3	5984.21	1620.52		3151.64	2832.61	208.02		0.934542	0.943112	0.320048		0.934542	0.943112	0.320048
	1.43	10146.1	5759.75	1684.88		2907.42	2608.15	272.375		0.862124	0.868379	0.419062		0.862124	0.868379	0.419062
	1.495	9962.25	5598.52	1862.59		2723.55	2446.92	450.085		0.807602	0.814698	0.692477		0.807602	0.814698	0.692477
	1.56	9701.15	5501.24	1928.37		2462.45	2349.64	515.868		0.730179	0.782308	0.793687		0.730179	0.782308	0.793687
	1.625	9326.04	5314.52	1993.18		2087.34	2162.92	580.676		0.61895	0.72014	0.893397		0.61895	0.72014	0.893397
	1.69	8876.47	5075.1	2062.46		1637.77	1923.5	649.964		0.485641	0.640426	1		0.485641	0.640426	1
	1.755	8546.75	4926.59	1964.56		1308.05	1774.99	552.058		0.38787	0.59098	0.849367		0.38787	0.59098	0.849367
	1.82	8429.26	4708.7	1845.24		1190.56	1557.1	432.742		0.353032	0.518434	0.665794		0.353032	0.518434	0.665794
	1.885	8336.4	4600.92	1806.31		1097.7	1449.32	393.812		0.325496	0.482549	0.605898		0.325496	0.482549	0.605898
	1.95	8571.57	4339.76	1809.27		1332.87	1188.16	396.773		0.39523	0.395596	0.610454		0.39523	0.395596	0.610454
	2.015	8613.64	4369.23	1736.01		1374.94	1217.63	323.51		0.407705	0.405408	0.497735		0.407705	0.405408	0.497735
	2.08	8734.73	4393.51	1726.88		1496.03	1241.91	314.382		0.443611	0.413492	0.483691		0.443611	0.413492	0.483691
	2.145	8714.75	4269	1840.88		1476.05	1117.4	428.375		0.437687	0.372036	0.659075		0.437687	0.372036	0.659075
	Background	7238.7	3151.6	1412.5	Maximum Value	2570.73	2059.53	499.844		1	1	1
	0	9383	4054.83	1415.83		2144.3	903.23	3.333		0.834121	0.438561	0.00666808		0.834121	0.438561	0.00666808
	0.065	9808.96	4100.72	1525		2570.26	949.12	112.504		0.999817	0.460843	0.225078		0.999817	0.460843	0.225078
	0.13	9809.43	4022.39	1602.96		2570.73	870.79	190.456		1	0.42281	0.381031		1	0.42281	0.381031
	0.195	9533.6	4034.08	1673.12		2294.9	882.48	260.622		0.892704	0.428486	0.521407		0.892704	0.428486	0.521407
	0.26	8948.04	3997.83	1810.22		1709.34	846.23	397.724		0.664924	0.410885	0.795696		0.664924	0.410885	0.795696
	0.325	8405.51	4103.33	1847.05		1166.81	951.73	434.546		0.453883	0.46211	0.869363		0.453883	0.46211	0.869363
	0.39	8297.6	4252.8	1891.05		1058.9	1101.2	478.554		0.411906	0.534685	0.957407		0.411906	0.534685	0.957407
	0.455	8509.14	4484.36	1826.03		1270.44	1332.76	413.533		0.494194	0.647119	0.827324		0.494194	0.647119	0.827324
	0.52	8655.28	4738.11	1708.38		1416.58	1586.51	295.883		0.551042	0.770326	0.591951		0.551042	0.770326	0.591951
	0.585	8840.33	5006.5	1711.02		1601.63	1854.9	298.522		0.623025	0.900642	0.59723		0.623025	0.900642	0.59723
	0.65	9008.82	5105.33	1581.68		1770.12	1953.73	169.176		0.688567	0.948629	0.338458		0.688567	0.948629	0.338458
	0.715	9162.62	5167.23	1495.55		1923.92	2015.63	83.047		0.748394	0.978684	0.166146		0.748394	0.978684	0.166146
	0.78	9181.17	5211.13	1448.32		1942.47	2059.53	35.818		0.75561	1	0.0716584		0.75561	1	0.0716584
	0.845	8749.33	5076.01	1463.38		1510.63	1924.41	50.884		0.587627	0.934393	0.1018		0.587627	0.934393	0.1018
	0.91	8499.73	4936.93	1491.13		1261.03	1785.33	78.633		0.490534	0.866863	0.157315		0.490534	0.866863	0.157315
	0.975	8463.34	4743.55	1451.64		1224.64	1591.95	39.136		0.476378	0.772968	0.0782964		0.476378	0.772968	0.0782964
	1.04	8334.09	4656.89	1479.62		1095.39	1505.29	67.121		0.426101	0.73089	0.134284		0.426101	0.73089	0.134284
	1.105	8334.95	4524.79	1435.77		1096.25	1373.19	23.267		0.426435	0.666749	0.0465485		0.426435	0.666749	0.0465485
	1.17	8129.43	4439.5	1419.24		890.73	1287.9	6.737		0.346489	0.625337	0.0134782		0.346489	0.625337	0.0134782
	1.235	8284.03	4613.16	1576.69		1045.33	1461.56	164.189		0.406628	0.709657	0.32848		0.406628	0.709657	0.32848
	1.3	8093.94	4815.95	1423.3		855.24	1664.35	10.799		0.332684	0.808121	0.0216047		0.332684	0.808121	0.0216047
	1.365	7907.62	4878.53	1456.75		668.92	1726.93	44.25		0.260206	0.838507	0.0885276		0.260206	0.838507	0.0885276
	1.43	7802.46	4809.35	1514.09		563.76	1657.75	101.585		0.2193	0.804917	0.203233		0.2193	0.804917	0.203233
	1.495	7951.62	4740.58	1552.51		712.92	1588.98	140.007		0.277322	0.771526	0.280101		0.277322	0.771526	0.280101
	1.56	8146.91	4703.52	1610.92		908.21	1551.92	198.416		0.353289	0.753531	0.396956		0.353289	0.753531	0.396956
	1.625	8359.39	4743.88	1639.5		1120.69	1592.28	226.996		0.435942	0.773128	0.454134		0.435942	0.773128	0.454134
	1.69	8169.11	4567.33	1695.47		930.41	1415.73	282.966		0.361924	0.687404	0.566109		0.361924	0.687404	0.566109
	1.755	8243.44	4341.35	1779.33		1004.74	1189.75	366.832		0.390838	0.57768	0.733893		0.390838	0.57768	0.733893
	1.82	8479.03	4319.37	1880.06		1240.33	1167.77	467.556		0.482482	0.567008	0.935404		0.482482	0.567008	0.935404
	1.885	8380.29	4114.81	1868.66		1141.59	963.21	456.156		0.444072	0.467684	0.912597		0.444072	0.467684	0.912597
	1.95	8579.86	3925.99	1912.34		1341.16	774.39	499.844		0.521704	0.376003	1		0.521704	0.376003	1
	2.015	8491.31	3958	1718.48		1252.61	806.4	305.979		0.487258	0.391546	0.612149		0.487258	0.391546	0.612149
	2.08	8294.48	3749.09	1669.77		1055.78	597.49	257.269		0.410693	0.29011	0.514699		0.410693	0.29011	0.514699
	2.145	7905.99	3775.35	1595.36		667.29	623.75	182.857		0.259572	0.30286	0.365828		0.259572	0.30286	0.365828
	2.21	7776.67	3801.16	1543.88		537.97	649.56	131.383		0.209267	0.315392	0.262848		0.209267	0.315392	0.262848
	2.275	7911.83	3757.75	1554.42		673.13	606.15	141.917		0.261844	0.294315	0.283923		0.261844	0.294315	0.283923
	Background	7238.7	3151.6	1412.5	Maximum Value	1821.21	2422.16	507.388		1	1	1
	0	7756.25	4063.56	1777.31		517.55	911.96	364.812		0.284179	0.376507	0.719		0.284179	0.376507	0.719
	0.065	7909.44	3999.05	1852.28		670.74	847.45	439.784		0.368294	0.349874	0.866761		0.368294	0.349874	0.866761
	0.13	7753.95	4108.2	1852.89		515.25	956.6	440.393		0.282916	0.394937	0.867961		0.282916	0.394937	0.867961
	0.195	7687.41	4053.67	1798.33		448.71	902.07	385.833		0.24638	0.372424	0.76043		0.24638	0.372424	0.76043
	0.26	7777.31	4299.24	1919.89		538.61	1147.64	507.388		0.295743	0.473809	1		0.295743	0.473809	1
	0.325	7818.29	4298.98	1912.81		579.59	1147.38	500.305		0.318244	0.473701	0.98604		0.318244	0.473701	0.98604
	0.39	7909.46	4289.69	1905.39		670.76	1138.09	492.887		0.368305	0.469866	0.97142		0.368305	0.469866	0.97142
	0.455	8098.67	4311.89	1856.71		859.97	1160.29	444.212		0.472197	0.479031	0.875488		0.472197	0.479031	0.875488
	0.52	8025.26	4508.33	1827.45		786.56	1356.73	414.953		0.431889	0.560132	0.817822		0.431889	0.560132	0.817822
	0.585	8246.64	4595.18	1781.04		1007.94	1443.58	368.541		0.553445	0.595989	0.726349		0.553445	0.595989	0.726349
	0.65	8201.62	4892.35	1648.42		962.92	1740.75	235.924		0.528725	0.718677	0.464977		0.528725	0.718677	0.464977
	0.715	8480.32	4939.76	1726.77		1241.62	1788.16	314.274		0.681756	0.73825	0.619396		0.681756	0.73825	0.619396
	0.78	8503.52	5092.81	1637.22		1264.82	1941.21	224.721		0.694494	0.801438	0.442898		0.694494	0.801438	0.442898
	0.845	8654.39	5152.46	1580.38		1415.69	2000.86	167.876		0.777335	0.826064	0.330863		0.777335	0.826064	0.330863
	0.91	8731.58	5245.52	1518.47		1492.88	2093.92	105.974		0.819719	0.864485	0.208862		0.819719	0.864485	0.208862
	0.975	8876.8	5313.28	1529.94		1638.1	2161.68	117.443		0.899457	0.89246	0.231466		0.899457	0.89246	0.231466
	1.04	9039.57	5340.19	1536.95		1800.87	2188.59	124.448		0.988832	0.90357	0.245272		0.988832	0.90357	0.245272
	1.105	9059.91	5464.46	1597.96		1821.21	2312.86	185.456		1	0.954875	0.365511		1	0.954875	0.365511
	1.17	8915.13	5573.76	1571.41		1676.43	2422.16	158.915		0.920503	1	0.313202		0.920503	1	0.313202
	1.235	8825.28	5488.92	1477.15		1586.58	2337.32	64.651		0.871168	0.964973	0.127419		0.871168	0.964973	0.127419
	1.3	9016.16	5446.81	1594.96		1777.46	2295.21	182.459		0.975978	0.947588	0.359604		0.975978	0.947588	0.359604
	1.365	8944.4	5315.45	1598.79		1705.7	2163.85	186.289		0.936575	0.893356	0.367153		0.936575	0.893356	0.367153
	1.43	8567.12	5208.21	1638.64		1328.42	2056.61	226.138		0.729416	0.849081	0.44569		0.729416	0.849081	0.44569
	1.495	8651.22	5018.86	1635.71		1412.52	1867.26	223.215		0.775594	0.770907	0.43993		0.775594	0.770907	0.43993
	1.56	8582.5	4920.43	1771.46		1343.8	1768.83	358.958		0.737861	0.73027	0.707463		0.737861	0.73027	0.707463
	1.625	8471.32	4908.93	1817.08		1232.62	1757.33	404.577		0.676814	0.725522	0.797372		0.676814	0.725522	0.797372
	1.69	8295.53	4755.07	1908.86		1056.83	1603.47	496.358		0.58029	0.662	0.978261		0.58029	0.662	0.978261
	1.755	8567.97	4624.08	1848.01		1329.27	1472.48	435.513		0.729883	0.60792	0.858343		0.729883	0.60792	0.858343
	1.82	8512.13	4347.02	1780.46		1273.43	1195.42	367.957		0.699222	0.493535	0.725198		0.699222	0.493535	0.725198
	1.885	8384.63	4301.51	1751.63		1145.93	1149.91	339.131		0.629214	0.474746	0.668386		0.629214	0.474746	0.668386
	1.95	8196.97	4206.4	1644.4		958.27	1054.8	231.904		0.526172	0.435479	0.457055		0.526172	0.435479	0.457055
	2.015	8202.05	4305.43	1587.77		963.35	1153.83	175.272		0.528962	0.476364	0.34544		0.528962	0.476364	0.34544
	2.08	7953.74	4083.1	1552.55		715.04	931.5	140.048		0.392618	0.384574	0.276018		0.392618	0.384574	0.276018
	HeLa_tetCENPBmCRMI1_STB-MG132_+Dox_RO3306_BLM-RFP-BubR1-24.czi
	Background	7256.2	2144.4	1508.9	Maximum Value	3392.46	2137.77	453.001		1	1	1
	0	7260.5	2648.38	1522.12		4.3	503.98	13.225		0.00126752	0.23575	0.0291942		0.00126752	0.23575	0.0291942
	0.065	7295.42	2672.18	1588.87		39.22	527.78	79.965		0.0115609	0.246883	0.176523		0.0115609	0.246883	0.176523
	0.13	7181.06	2661	1581.92		-75.14	516.6	73.022		-0.0221491	0.241654	0.161196		0	0.241654	0.161196
	0.195	7257.29	2745.79	1693.18		1.09	601.39	184.285		0.000321301	0.281317	0.406809		0.000321301	0.281317	0.406809
	0.26	7390.62	2850.38	1805.68		134.42	705.98	296.78		0.0396232	0.330241	0.655142		0.0396232	0.330241	0.655142
	0.325	7857.27	2920.35	1826.75		601.07	775.95	317.846		0.177178	0.362972	0.701645		0.177178	0.362972	0.701645
	0.39	8111.46	3141.74	1900.75		855.26	997.34	391.85		0.252106	0.466533	0.865009		0.252106	0.466533	0.865009
	0.455	7997.36	3376.57	1884.15		741.16	1232.17	375.253		0.218473	0.576381	0.828371		0.218473	0.576381	0.828371
	0.52	8102.15	3610.19	1785.24		845.95	1465.79	276.341		0.249362	0.685663	0.610023		0.249362	0.685663	0.610023
	0.585	8392.37	3750.66	1631.06		1136.17	1606.26	122.162		0.33491	0.751372	0.269673		0.33491	0.751372	0.269673
	0.65	8751.27	3835.42	1634.94		1495.07	1691.02	126.043		0.440704	0.791021	0.27824		0.440704	0.791021	0.27824
	0.715	9249.58	3993.45	1659.66		1993.38	1849.05	150.756		0.587591	0.864943	0.332794		0.587591	0.864943	0.332794
	0.78	9717.08	3939.79	1624.7		2460.88	1795.39	115.803		0.725397	0.839842	0.255635		0.725397	0.839842	0.255635
	0.845	10070.6	3893.03	1527.44		2814.38	1748.63	18.536		0.829599	0.817969	0.0409182		0.829599	0.817969	0.0409182
	0.91	10648.7	3918.18	1674.43		3392.46	1773.78	165.53		1	0.829734	0.365408		1	0.829734	0.365408
	0.975	10582	3951.81	1600.2		3325.8	1807.41	91.298		0.980351	0.845465	0.20154		0.980351	0.845465	0.20154
	1.04	10483	3827.77	1640.15		3226.79	1683.37	131.253		0.951165	0.787442	0.289741		0.951165	0.787442	0.289741
	1.105	9658.33	3734.76	1627.38		2402.13	1590.36	118.481		0.708079	0.743934	0.261547		0.708079	0.743934	0.261547
	1.17	9542.44	3861.54	1593		2286.24	1717.14	84.097		0.673918	0.803239	0.185644		0.673918	0.803239	0.185644
	1.235	9730.47	4101.8	1598.74		2474.27	1957.4	89.838		0.729344	0.915627	0.198317		0.729344	0.915627	0.198317
	1.3	9962.07	4282.17	1602.37		2705.87	2137.77	93.471		0.797613	1	0.206337		0.797613	1	0.206337
	1.365	9998.39	4169.02	1654.24		2742.19	2024.62	145.343		0.808319	0.947071	0.320845		0.808319	0.947071	0.320845
	1.43	9636.98	4122.91	1692.43		2380.78	1978.51	183.526		0.701786	0.925502	0.405134		0.701786	0.925502	0.405134
	1.495	9222.73	4050.99	1671.53		1966.53	1906.59	162.625		0.579677	0.891859	0.358995		0.579677	0.891859	0.358995
	1.56	8942.68	4044.35	1620.87		1686.48	1899.95	111.969		0.497126	0.888753	0.247172		0.497126	0.888753	0.247172
	1.625	8498.47	3786.74	1829.15		1242.27	1642.34	320.25		0.366186	0.768249	0.706952		0.366186	0.768249	0.706952
	1.69	8398.8	3475.06	1944.52		1142.6	1330.66	435.624		0.336806	0.622452	0.96164		0.336806	0.622452	0.96164
	1.755	8416.94	3336.64	1961.9		1160.74	1192.24	453.001		0.342153	0.557703	1		0.342153	0.557703	1
	1.82	8134.99	3170.88	1926.3		878.79	1026.48	417.399		0.259042	0.480164	0.921409		0.259042	0.480164	0.921409
	1.885	8065.64	3039.37	1856.96		809.44	894.97	348.057		0.2386	0.418647	0.768336		0.2386	0.418647	0.768336
	1.95	8131.13	2971.11	1814.5		874.93	826.71	305.602		0.257904	0.386716	0.674617		0.257904	0.386716	0.674617
	2.015	8352.97	2878.58	1811.89		1096.77	734.18	302.994		0.323296	0.343433	0.668859		0.323296	0.343433	0.668859
	2.08	8419.33	2769.7	1734.69		1163.13	625.3	225.789		0.342857	0.292501	0.498429		0.342857	0.292501	0.498429
	Background	7256.2	2144.4	1508.9	Maximum Value	2651.66	1946.07	765.783		1	1	1
	0	8697.5	2911	2039.5		1441.3	766.6	530.6		0.543546	0.393922	0.692886		0.543546	0.393922	0.692886
	0.065	8456.48	2876.92	2036.62		1200.28	732.52	527.717		0.452652	0.37641	0.689121		0.452652	0.37641	0.689121
	0.13	8497.02	3011.42	2144.67		1240.82	867.02	635.769		0.467941	0.445524	0.830221		0.467941	0.445524	0.830221
	0.195	8539.9	3087.18	2236.53		1283.7	942.78	727.628		0.484112	0.484453	0.950175		0.484112	0.484453	0.950175
	0.26	8621.17	3046.05	2274.68		1364.97	901.65	765.783		0.514761	0.463318	1		0.514761	0.463318	1
	0.325	8611.72	3088.15	2247.43		1355.52	943.75	738.535		0.511197	0.484952	0.964418		0.511197	0.484952	0.964418
	0.39	8443.6	3060.28	2150.91		1187.4	915.88	642.014		0.447795	0.470631	0.838376		0.447795	0.470631	0.838376
	0.455	8670.78	3343.71	2038.71		1414.58	1199.31	529.806		0.53347	0.616273	0.691849		0.53347	0.616273	0.691849
	0.52	8802.51	3349.73	1869.37		1546.31	1205.33	360.468		0.583148	0.619366	0.470718		0.583148	0.619366	0.470718
	0.585	9129.03	3433.6	1813.1		1872.83	1289.2	304.198		0.706286	0.662463	0.397238		0.706286	0.662463	0.397238
	0.65	9454.08	3529.73	1762.01		2197.88	1385.33	253.114		0.828869	0.71186	0.33053		0.828869	0.71186	0.33053
	0.715	9907.86	3540.82	1716.37		2651.66	1396.42	207.466		1	0.717559	0.27092		1	0.717559	0.27092
	0.78	9866.77	3521.09	1704.75		2610.57	1376.69	195.851		0.984504	0.707421	0.255753		0.984504	0.707421	0.255753
	0.845	9367.97	3607.44	1711.38		2111.77	1463.04	202.477		0.796395	0.751792	0.264405		0.796395	0.751792	0.264405
	0.91	9303.95	3616.72	1715.71		2047.75	1472.32	206.813		0.772252	0.756561	0.270067		0.772252	0.756561	0.270067
	0.975	9182.03	3519.59	1701.89		1925.83	1375.19	192.99		0.726273	0.70665	0.252017		0.726273	0.70665	0.252017
	1.04	9019.32	3491.88	1643.06		1763.12	1347.48	134.159		0.664912	0.692411	0.175192		0.664912	0.692411	0.175192
	1.105	8910.77	3403.23	1643.79		1654.57	1258.83	134.894		0.623975	0.646858	0.176152		0.623975	0.646858	0.176152
	1.17	8849.69	3361.05	1740.51		1593.49	1216.65	231.606		0.600941	0.625183	0.302443		0.600941	0.625183	0.302443
	1.235	8976.68	3319.46	1759.59		1720.48	1175.06	250.694		0.648831	0.603812	0.32737		0.648831	0.603812	0.32737
	1.3	8993.15	3352.01	1787.03		1736.95	1207.61	278.129		0.655043	0.620538	0.363196		0.655043	0.620538	0.363196
	1.365	8859.13	3475.83	1894.9		1602.93	1331.43	385.998		0.604501	0.684163	0.504057		0.604501	0.684163	0.504057
	1.43	8919.47	3527.03	1887.77		1663.27	1382.63	378.873		0.627256	0.710473	0.494752		0.627256	0.710473	0.494752
	1.495	8887.72	3581.43	1870.3		1631.52	1437.03	361.395		0.615283	0.738427	0.471929		0.615283	0.738427	0.471929
	1.56	8719.88	3797.05	1980.65		1463.68	1652.65	471.747		0.551986	0.849224	0.616032		0.551986	0.849224	0.616032
	1.625	8651.94	3763.68	1958.6		1395.74	1619.28	449.701		0.526365	0.832077	0.587243		0.526365	0.832077	0.587243
	1.69	8890.52	3821.56	2081		1634.32	1677.16	572.103		0.616338	0.861819	0.747082		0.616338	0.861819	0.747082
	1.755	8897.79	3871.26	2128.06		1641.59	1726.86	619.16		0.61908	0.887358	0.808532		0.61908	0.887358	0.808532
	1.82	8978.89	4090.47	2166.88		1722.69	1946.07	657.982		0.649665	1	0.859228		0.649665	1	0.859228
	1.885	9361.75	4080.49	2150.39		2105.55	1936.09	641.489		0.79405	0.994872	0.83769		0.79405	0.994872	0.83769
	1.95	9600.97	4000.48	2097.79		2344.77	1856.08	588.888		0.884265	0.953758	0.769001		0.884265	0.953758	0.769001
	2.015	9600.48	3908.9	2016.88		2344.28	1764.5	507.983		0.88408	0.906699	0.663351		0.88408	0.906699	0.663351
	2.08	9760.58	4010.18	1911.16		2504.38	1865.78	402.259		0.944457	0.958742	0.525291		0.944457	0.958742	0.525291
	Background	7256.2	2144.4	1508.9	Maximum Value	3461.4	1933.1	756.483		1	1	1
	0	9203.5	3529	1878.5		1947.3	1384.6	369.6		0.562576	0.716259	0.488577		0.562576	0.716259	0.488577
	0.065	9079.92	3591.18	1968.48		1823.72	1446.78	459.579		0.526874	0.748425	0.607521		0.526874	0.748425	0.607521
	0.13	8739.25	3703.02	1977.77		1483.05	1558.62	468.867		0.428454	0.80628	0.619798		0.428454	0.80628	0.619798
	0.195	8697.89	3760.03	2033.27		1441.69	1615.63	524.372		0.416505	0.835772	0.693171		0.416505	0.835772	0.693171
	0.26	8972.82	3609.57	2090.96		1716.62	1465.17	582.061		0.495932	0.757938	0.76943		0.495932	0.757938	0.76943
	0.325	9082.33	3763.36	2184.1		1826.13	1618.96	675.198		0.52757	0.837494	0.892549		0.52757	0.837494	0.892549
	0.39	9172.03	4023.85	2265.38		1915.83	1879.45	756.483		0.553484	0.972247	1		0.553484	0.972247	1
	0.455	9581.02	4077.5	2148.79		2324.82	1933.1	639.891		0.671642	1	0.845876		0.671642	1	0.845876
	0.52	9613.93	3971.57	2097.13		2357.73	1827.17	588.226		0.681149	0.945202	0.77758		0.681149	0.945202	0.77758
	0.585	9739.94	3990.26	2065.18		2483.74	1845.86	556.284		0.717554	0.95487	0.735356		0.717554	0.95487	0.735356
	0.65	9790.92	4060.88	1902.17		2534.72	1916.48	393.269		0.732282	0.991402	0.519865		0.732282	0.991402	0.519865
	0.715	9835.09	4066.45	1897.02		2578.89	1922.05	388.118		0.745042	0.994284	0.513056		0.745042	0.994284	0.513056
	0.78	9664.16	4074.87	1805.27		2407.96	1930.47	296.366		0.695661	0.998639	0.391768		0.695661	0.998639	0.391768
	0.845	9644.51	4071.96	1764.64		2388.31	1927.56	255.739		0.689984	0.997134	0.338063		0.689984	0.997134	0.338063
	0.91	9689.08	4046.51	1705.91		2432.88	1902.11	197.008		0.70286	0.983969	0.260426		0.70286	0.983969	0.260426
	0.975	9719.52	3956.94	1728.9		2463.32	1812.54	220		0.711654	0.937634	0.290819		0.711654	0.937634	0.290819
	1.04	9699.9	3874.34	1645.83		2443.7	1729.94	136.929		0.705986	0.894905	0.181007		0.705986	0.894905	0.181007
	1.105	10181.8	3727.6	1759.01		2925.63	1583.2	250.105		0.845216	0.818995	0.330615		0.845216	0.818995	0.330615
	1.17	10462.5	3626.49	1807.35		3206.26	1482.09	298.448		0.92629	0.766691	0.39452		0.92629	0.766691	0.39452
	1.235	10560.8	3571.82	1764.35		3304.63	1427.42	255.446		0.954709	0.73841	0.337676		0.954709	0.73841	0.337676
	1.3	10545.3	3736.65	1798.48		3289.06	1592.25	289.578		0.950211	0.823677	0.382795		0.950211	0.823677	0.382795
	1.365	10717.6	3909.58	1817		3461.4	1765.18	308.101		1	0.913134	0.407281		1	0.913134	0.407281
	1.43	10405.4	4001.99	1812.43		3149.19	1857.59	303.532		0.909802	0.960938	0.401241		0.909802	0.960938	0.401241
	1.495	10190.2	4008.59	1852.45		2934.03	1864.19	343.555		0.847643	0.964353	0.454148		0.847643	0.964353	0.454148
	1.56	9971.34	3792.15	1984.2		2715.14	1647.75	475.297		0.784405	0.852387	0.628298		0.784405	0.852387	0.628298
	1.625	9834.84	3740.72	2074.2		2578.64	1596.32	565.303		0.74497	0.825782	0.747278		0.74497	0.825782	0.747278
	1.69	9523.17	3672.37	2177.02		2266.97	1527.97	668.118		0.654929	0.790425	0.88319		0.654929	0.790425	0.88319
	1.755	9262.34	3593.32	2158.9		2006.14	1448.92	649.997		0.579575	0.749532	0.859235		0.579575	0.749532	0.859235
	1.82	9166.14	3553.43	2142.38		1909.94	1409.03	633.476		0.551783	0.728897	0.837396		0.551783	0.728897	0.837396
	1.885	8970.54	3419.99	2198.36		1714.34	1275.59	689.464		0.495274	0.659868	0.911407		0.495274	0.659868	0.911407
	1.95	9034.04	3280.76	2123.98		1777.84	1136.36	615.084		0.513619	0.587843	0.813084		0.513619	0.587843	0.813084
	2.015	8966.61	3153.38	2095.35		1710.41	1008.98	586.446		0.494138	0.521949	0.775227		0.494138	0.521949	0.775227
	2.08	9123.43	2943.7	2126.07		1867.23	799.3	617.169		0.539444	0.413481	0.81584		0.539444	0.413481	0.81584
	Background	7256.2	2144.4	1508.9	Maximum Value	2511.1	1922.48	641.771		1	1	1
	0	9213.31	3046.25	1943.19		1957.11	901.85	434.288		0.779384	0.469108	0.676702		0.779384	0.469108	0.676702
	0.065	9001.99	3145.29	1973.85		1745.79	1000.89	464.954		0.695229	0.520624	0.724486		0.695229	0.520624	0.724486
	0.13	8930.15	3212.6	1973.6		1673.95	1068.2	464.703		0.66662	0.555636	0.724095		0.66662	0.555636	0.724095
	0.195	8817.74	3165.58	2150.67		1561.54	1021.18	641.771		0.621855	0.531178	1		0.621855	0.531178	1
	0.26	9228.73	3235.27	2123.04		1972.53	1090.87	614.137		0.785524	0.567429	0.956941		0.785524	0.567429	0.956941
	0.325	9573.3	3310.11	2099.08		2317.1	1165.71	590.181		0.922743	0.606357	0.919613		0.922743	0.606357	0.919613
	0.39	9690.99	3501.03	2002.12		2434.79	1356.63	493.22		0.969611	0.705667	0.76853		0.969611	0.705667	0.76853
	0.455	9673.71	3605.23	1825.6		2417.51	1460.83	316.699		0.962729	0.759867	0.493477		0.962729	0.759867	0.493477
	0.52	9565	3626.53	1689.75		2308.8	1482.13	180.85		0.919438	0.770947	0.281798		0.919438	0.770947	0.281798
	0.585	9366.05	3827.73	1602.94		2109.85	1683.33	94.045		0.840209	0.875603	0.14654		0.840209	0.875603	0.14654
	0.65	8833.43	3837.13	1575.97		1577.23	1692.73	67.068		0.628103	0.880493	0.104505		0.628103	0.880493	0.104505
	0.715	8770.06	3931.97	1622.15		1513.86	1787.57	113.247		0.602867	0.929825	0.17646		0.602867	0.929825	0.17646
	0.78	8723.06	3947.41	1497.43		1466.86	1803.01	-11.472		0.58415	0.937856	-0.0178755		0.58415	0.937856	0
	0.845	8830.8	3875.57	1546.66		1574.6	1731.17	37.756		0.627056	0.900488	0.058831		0.627056	0.900488	0.058831
	0.91	9187.87	3969.9	1498.19		1931.67	1825.5	-10.712		0.769253	0.949555	-0.0166913		0.769253	0.949555	0
	0.975	9211.2	3923.47	1501.29		1955	1779.07	-7.614		0.778543	0.925404	-0.011864		0.778543	0.925404	0
	1.04	9520.01	4066.88	1522.94		2263.81	1922.48	14.037		0.901521	1	0.0218723		0.901521	1	0.0218723
	1.105	9767.3	3961.45	1575.11		2511.1	1817.05	66.211		1	0.945159	0.103169		1	0.945159	0.103169
	1.17	9754.27	4014.49	1516.3		2498.07	1870.09	7.397		0.994811	0.972749	0.0115259		0.994811	0.972749	0.0115259
	1.235	9637.24	3911.95	1565.11		2381.04	1767.55	56.213		0.948206	0.919411	0.0875904		0.948206	0.919411	0.0875904
	1.3	9234.5	3913.55	1586.57		1978.3	1769.15	77.67		0.787822	0.920244	0.121024		0.787822	0.920244	0.121024
	1.365	8805.05	3891.04	1577.39		1548.85	1746.64	68.494		0.616801	0.908535	0.106727		0.616801	0.908535	0.106727
	1.43	8733.62	3839.07	1633.02		1477.42	1694.67	124.119		0.588356	0.881502	0.193401		0.588356	0.881502	0.193401
	1.495	8597.04	3661.72	1660.67		1340.84	1517.32	151.77		0.533965	0.789251	0.236486		0.533965	0.789251	0.236486
	1.56	8780.39	3626.16	1688.01		1524.19	1481.76	179.11		0.606981	0.770754	0.279087		0.606981	0.770754	0.279087
	1.625	8693.89	3599.9	1726.45		1437.69	1455.5	217.552		0.572534	0.757095	0.338987		0.572534	0.757095	0.338987
	1.69	8669.63	3554.04	1832.81		1413.43	1409.64	323.908		0.562873	0.73324	0.50471		0.562873	0.73324	0.50471
	1.755	8480.02	3479.93	1828.77		1223.82	1335.53	319.874		0.487364	0.694691	0.498424		0.487364	0.694691	0.498424
	1.82	8094.64	3354.77	1763.97		838.44	1210.37	255.072		0.333894	0.629588	0.39745		0.333894	0.629588	0.39745
	1.885	8045.58	3405.02	1705.02		789.38	1260.62	196.121		0.314356	0.655726	0.305593		0.314356	0.655726	0.305593
	1.95	8096.84	3367.54	1602.1		840.64	1223.14	93.195		0.33477	0.63623	0.145215		0.33477	0.63623	0.145215
	2.015	7968.68	3311.25	1537.21		712.48	1166.85	28.313		0.283732	0.60695	0.044117		0.283732	0.60695	0.044117
	2.08	7939.04	3265.08	1573.78		682.84	1120.68	64.875		0.271929	0.582935	0.101087		0.271929	0.582935	0.101087
	2.145	8046.92	3240.47	1555.54		790.72	1096.07	46.642		0.31489	0.570133	0.072677		0.31489	0.570133	0.072677
	Background	7256.2	2144.4	1508.9	Maximum Value	4102.31	2279.1	977.954		1	1	1
	0	10096	3338.67	2059.33		2839.8	1194.27	550.433		0.692244	0.524009	0.562841		0.692244	0.524009	0.562841
	0.065	10201.5	3445.55	2121.64		2945.26	1301.15	612.74		0.717952	0.570905	0.626553		0.717952	0.570905	0.626553
	0.13	10209.4	3501.65	2158.34		2953.16	1357.25	649.441		0.719877	0.59552	0.664081		0.719877	0.59552	0.664081
	0.195	10206.8	3430.47	2153.93		2950.55	1286.07	645.03		0.719241	0.564289	0.659571		0.719241	0.564289	0.659571
	0.26	10131.5	3489.93	2312.2		2875.27	1345.53	803.299		0.70089	0.590378	0.821408		0.70089	0.590378	0.821408
	0.325	9976.53	3719.21	2449.01		2720.33	1574.81	940.105		0.663122	0.690979	0.961298		0.663122	0.690979	0.961298
	0.39	10073.7	3858.78	2486.85		2817.48	1714.38	977.954		0.686803	0.752218	1		0.686803	0.752218	1
	0.455	10410.3	3871.25	2483.46		3154.07	1726.85	974.557		0.768852	0.757689	0.996526		0.768852	0.757689	0.996526
	0.52	10544.5	4008.84	2463.3		3288.3	1864.44	954.401		0.801573	0.81806	0.975916		0.801573	0.81806	0.975916
	0.585	10754.6	4055.7	2275.99		3498.37	1911.3	767.088		0.852781	0.838621	0.78438		0.852781	0.838621	0.78438
	0.65	10744.4	4141.33	2133.47		3488.21	1996.93	624.573		0.850304	0.876192	0.638653		0.850304	0.876192	0.638653
	0.715	10656.4	4231.4	2113.99		3400.23	2087	605.088		0.828857	0.915712	0.618728		0.828857	0.915712	0.618728
	0.78	10665.1	4356.88	2131.54		3408.89	2212.48	622.636		0.830968	0.970769	0.636672		0.830968	0.970769	0.636672
	0.845	10895.5	4423.5	2113.69		3639.35	2279.1	604.788		0.887147	1	0.618422		0.887147	1	0.618422
	0.91	10911.2	4334.53	2129.22		3655.01	2190.13	620.316		0.890964	0.960963	0.6343		0.890964	0.960963	0.6343
	0.975	11043.8	4339.38	2142.46		3787.6	2194.98	633.561		0.923285	0.963091	0.647843		0.923285	0.963091	0.647843
	1.04	10881.7	4272.59	2071.62		3625.52	2128.19	562.718		0.883775	0.933785	0.575403		0.883775	0.933785	0.575403
	1.105	10791.5	4196.9	2161.88		3535.33	2052.5	652.975		0.86179	0.900575	0.667695		0.86179	0.900575	0.667695
	1.17	10565.7	4133.95	2047.67		3309.48	1989.55	538.767		0.806736	0.872954	0.550912		0.806736	0.872954	0.550912
	1.235	10358.2	4157.6	2046.5		3102.02	2013.2	537.598		0.756164	0.883331	0.549717		0.756164	0.883331	0.549717
	1.3	10512.8	3953.37	2107.35		3256.59	1808.97	598.453		0.793843	0.793721	0.611944		0.793843	0.793721	0.611944
	1.365	10719.7	3830.48	2051.91		3463.48	1686.08	543.006		0.844276	0.739801	0.555247		0.844276	0.739801	0.555247
	1.43	11245.7	4000.25	2104.64		3989.49	1855.85	595.735		0.972498	0.814291	0.609165		0.972498	0.814291	0.609165
	1.495	11295.6	3930.93	2024.44		4039.42	1786.53	515.545		0.98467	0.783875	0.527167		0.98467	0.783875	0.527167
	1.56	11358.5	3954.77	2014.71		4102.31	1810.37	505.812		1	0.794335	0.517215		1	0.794335	0.517215
	1.625	10880.7	3836.59	2009.52		3624.48	1692.19	500.622		0.883522	0.742482	0.511908		0.883522	0.742482	0.511908
	1.69	10739.2	3888.39	2004.55		3483.03	1743.99	495.65		0.849041	0.76521	0.506823		0.849041	0.76521	0.506823
	1.755	10633.2	3799.51	1971.91		3377.05	1655.11	463.011		0.823207	0.726212	0.473449		0.823207	0.726212	0.473449
	1.82	10574.4	3777.85	2034.07		3318.2	1633.45	525.168		0.808861	0.716708	0.537007		0.808861	0.716708	0.537007
	1.885	10548	3820.03	2052.8		3291.84	1675.63	543.901		0.802436	0.735216	0.556162		0.802436	0.735216	0.556162
	1.95	10287.2	3714.06	2236.09		3031	1569.66	727.191		0.738852	0.688719	0.743584		0.738852	0.688719	0.743584
	2.015	10350	3498.2	2328.07		3093.83	1353.8	819.17		0.754168	0.594006	0.837637		0.754168	0.594006	0.837637
	2.08	10298.8	3450.19	2368.34		3042.57	1305.79	859.443		0.741672	0.572941	0.878817		0.741672	0.572941	0.878817
	2.145	10205.2	3411.79	2411.43		2948.97	1267.39	902.527		0.718856	0.556092	0.922873		0.718856	0.556092	0.922873
	2.21	10299.7	3265.83	2275.82		3043.47	1121.43	766.915		0.741892	0.492049	0.784204		0.741892	0.492049	0.784204
	2.275	10181.1	3294.83	2167.02		2924.88	1150.43	658.12		0.712984	0.504774	0.672956		0.712984	0.504774	0.672956
	2.34	10166.3	3164.42	2137.03		2910.12	1020.02	628.135		0.709386	0.447554	0.642295		0.709386	0.447554	0.642295
	Background	7256.2	2144.4	1508.9	Maximum Value	5092.26	2334.27	853.798		1	1	1
	0	9713.33	3174	2075.33		2457.13	1029.6	566.433		0.482522	0.44108	0.663427		0.482522	0.44108	0.663427
	0.065	9719.41	3067.41	2172.49		2463.21	923.01	663.585		0.483716	0.395417	0.777215		0.483716	0.395417	0.777215
	0.13	9706.35	3148.46	2209.89		2450.15	1004.06	700.985		0.481152	0.430139	0.82102		0.481152	0.430139	0.82102
	0.195	9791.71	3229.58	2239.59		2535.51	1085.18	730.688		0.497914	0.464891	0.855809		0.497914	0.464891	0.855809
	0.26	9808.99	3217.38	2312.25		2552.79	1072.98	803.35		0.501308	0.459664	0.940913		0.501308	0.459664	0.940913
	0.325	9721.79	3415.48	2303.23		2465.59	1271.08	794.334		0.484184	0.54453	0.930354		0.484184	0.54453	0.930354
	0.39	9861.45	3518.57	2226.68		2605.25	1374.17	717.776		0.51161	0.588694	0.840686		0.51161	0.588694	0.840686
	0.455	10221	3541.58	2218.7		2964.79	1397.18	709.798		0.582215	0.598551	0.831342		0.582215	0.598551	0.831342
	0.52	10330.6	3595.63	2063.25		3074.39	1451.23	554.347		0.603738	0.621706	0.649272		0.603738	0.621706	0.649272
	0.585	10403.2	3642.6	2046.81		3146.98	1498.2	537.913		0.617993	0.641828	0.630024		0.617993	0.641828	0.630024
	0.65	10447.5	3761.82	2020.51		3191.29	1617.42	511.608		0.626694	0.692902	0.599214		0.626694	0.692902	0.599214
	0.715	10617	3858.09	1929.35		3360.8	1713.69	420.449		0.659982	0.734144	0.492446		0.659982	0.734144	0.492446
	0.78	10819.1	3921.76	1935.84		3562.87	1777.36	426.939		0.699664	0.76142	0.500047		0.699664	0.76142	0.500047
	0.845	11188.5	4019.2	2009.64		3932.26	1874.8	500.741		0.772203	0.803163	0.586486		0.772203	0.803163	0.586486
	0.91	11375.9	3938.81	2090.79		4119.65	1794.41	581.892		0.809002	0.768724	0.681534		0.809002	0.768724	0.681534
	0.975	11727.8	4193.35	2080.4		4471.58	2048.95	571.5		0.878113	0.877769	0.669362		0.878113	0.877769	0.669362
	1.04	11891.4	4140.01	2039.04		4635.16	1995.61	530.141		0.910236	0.854918	0.620921		0.910236	0.854918	0.620921
	1.105	12062.8	4217.28	2047.05		4806.6	2072.88	538.145		0.943903	0.888021	0.630295		0.943903	0.888021	0.630295
[truncated: 126 more rows]

## Sheet: Analysis AZD1152
	AZD1152
	HeLa_tetCENPBmCRMI1_STB-MG132_+Dox_AZD1152_BLM-RFP-BubR1-06.czi
[truncated: 874 more rows]

## Sheet: Background corrected
	Untreated				Untreated				BI2536				BI2536				RO3306				RO3306				AZD1152			AZD1152
[truncated: 872 more rows]

[truncated: 2 more sheets: Analysis Combined, Graphs]
