# Supplementary material for: Centromere protection requires strict mitotic inactivation of the Bloom syndrome helicase complex
Source: Research Square preprint supplement (doi:10.21203/rs.3.rs-4420374/v1), 2024-05-30
Supplement: Supplementary file 52 [file Fig S5B. SCEs.xlsx]

## Sheet: SCEs
	deltaBLM EGFP-BLM Sister chromatids exchanges (SCEs per chromosome)
	HAP1 and complemented cell lines:			deltaBLM:
	G1 Arrest (CDK4/6i, 1µM) 24 hours			G1 Arrest (CDK4/6i, 1µM) 24 hours
	Release + EdU (0.5 µM) 18 hours			Release + EdU (0.5 µM) 20 hours
	Wash EdU 12 hours			Wash EdU 16-18 hours
	Mitotic arrest (Nocodazole, 50 ng/µl) 2 hours			Mitotic arrest (Nocodazole, 50 ng/µl) 2 hours
	Average SCEs per chromosome (per spread)
	HAP1	deltaBLM	WT	S144A
	1	5.43333	0.836364	1.09375
	1.05882	5.16667	0.461538	1.18182
	0.925926	4.86364	1.02857	1.0303
	1.04762	5.45455	0.805556	1.1
	1.15	4.77273	1.29412	1.02703
	1.07143	4.21429	0.809524	0.72973
	1.09091	4.39394	1.05405	0.75
	0.714286	5.36	1.28	0.947368
	0.916667	5.0303	0.59375	1.0625
	1.07407	4.95	1.3	0.848485
	0.777778	3.45455	1.08511	1.08696
	1.14815	4.47619	0.541667	0.8
	0.962963	4.9375	1.27778	0.486486
	1	3.47826	0.787879	1.35135
	0.521739	4.35294	0.459459	1.15789
	0.833333	3.4	0.95122	0.772727
	0.777778	4	0.826087
		3.78947	1.26923
		4	1.12121
		4.77778	0.518519
		3.77778	0.76
		3.69231	1.46667
		4.52632	1.375
		4.66667
		3.57895
		4.44444
		4.90909

## Sheet: HAP1
	HAP1
	Image 01	Image 02	Image 03	Image 04	Image 07	Image 09	Image 11	Image 12	Image 13	Image 15	Image 16	Image 18	Image 19	Image 20	Image 22	Image 26	Image 28
	5	0	0	0	0	0	1	0	1	2	4	0	1	1		3	2
	1	0	0	1	1	1	4	0	0	0	0	1	2	0	0	0	0
	2	0	1	1	0	0	1	1	0	1	1	1	1	2	0	1	1
	2	1	0	0	0	0	0	2	0	2	0	0	0	3	2	0	1
	2	0	0	0	0	0	0	0	0	3	0	1	0	1	0	0	1
	1	0	1	1	2	1	2	0	1	2	0	0	0	1	0	2	1
	1	2	1	1	2	1	1	1	0	0	0	3	1	0	2	0	0
	2	1	0	2	3	1	0	3	1	0	0	2	1	0	1	0	3
	0	1	0	2	0	3	1	1	2	3	0	1	1	0	0	0	0
	0	0	0	1	3	1	1	0	0	1	1	2	2	1	0	1	3
	0	2	1	2	0	2	2	2	0	0	2	0	1	2	1	1	0
	3	1	1	0	3	2	0	0	1	0	0	1	0	2	0	0	1
	0	0	3	0	5	2	1	0	2	3	3	2	0	3	0	0	0
	0	1	1	0	0	4	0	1	2	3	0	0	4	2	2	2	0
	0	2	2	5	1	0	0	0	3	0	1	0	1	0	0	1	0
	2	1	0	2	2	0	0	1	1	0	2	1	0	0	1	2	0
	0	1	0	3	0	0	1	0	2	1	0	1	0	1	0	0	0
	0	1	0	0	0	1	2	0	0	0	4	0	0	1	0	0	0
	0	1	0	0	0	1	1	0	2	0	0	0	2	0	2	2	0
	1	1	1	0	1	3	0	2	2	0	2	1	3	0	0	2	0
	1	4	3	1		0	0	0	0	0	1	2	0		0	1	1
	0	0	4			0	0	0	1	1	0	2	1		1	2	1
	1	0	0			0	0	0	1	4		0	2		0	0	2
	0	0	0			3	2	1	0	0		3	1			0	1
	1	2	1			2	3	1		0		1	1				1
	1	3	4			1	0	1		1		0	1				2
	0	2	1			0	1	3		2		0	0				0
	0	0				1	5	1				1
	1	0					1	0				3
	0	1					2	2				0
	3	3					3	0				0
	1	2					1	1				1
	3	3					0	0				0
	1	0						0				1
	0							1
	0
	1
	2
	2
	0
Total SCEs	40	36	25	22	23	30	36	25	22	29	21	31	26	20	12	20	21
Total SCEs/number of chromosomes	1	1.05882	0.925926	1.04762	1.15	1.07143	1.09091	0.714286	0.916667	1.07407	0.777778	1.14815	0.962963	1	0.521739	0.833333	0.777778

## Sheet: ΔBLM
	ΔBLM
	Image 41	Image 44	Image 45	Image 46	Image 47	Image 48	Image 49	Image 52	Image 53	Image 54	Image 55	Image 56	Image 02	Image 04	Image 09	Image 11	Image 12	Image 14	Image 16	Image 17	Image 18	Image 19	Image 24	Image 34	Image 37	Image 07	Image 08
	5	5	4	4	8	3	5	9	6	1	2	4	7	7	5	3	5	5	7	6	2	6	3	9	4	9	5
	8	7	1	5	7	6	4	10	5	5	3	4	5	0	5	1	4	2	5	7	4	4	4	4	1	5	3
	2	8	8	4	8	2	4	3	8	4	5	6	6	5	4	1	2	4	3	2	3	3	3	2	2	4	5
	7	4	6	5	6	6	5	6	4	6	7	7	2	2	6	2	6	5	0	5	4	6	3	6	3	4	3
	7	5	6	7	5	3	6	6	3	5	4	3	7	7	1	4	4	1	2	4	4	3	3	8	2	3	4
	7	9	4	6	4	3	5	0	6	3	4	6	7	4	8	10	9	3	2	3	4	6	5	8	5	6	6
	2	5	6	5	4	4	1	5	4	6	1	6	4	3	3	4	2	2	5	4	5	1	8	2	3	4	7
	2	7	5	3	3	7	3	7	12	10	1	7	7	2	6	2	4	3	3	4	2	7	6	3	4	5	6
	5	1	5	4	3	5	5	7	5	5	2	2	5	2	7	2	3	1	4	8	6	3	4	0	2		5
	9	4	3	8	1	6	3	7	5	4	7	6	4	1	6	5	4	11	2			4	2	2	5		7
	8	5	3	9	7	6	0	4	3	4	6	6	4	5	4	5	4	5	3			2	8	2	0		3
	6	2	3		7	6	1	6	4	6	2	2	2	2	0	2	5	6	3			0	3	7	7
	9		5		3	4	7	5	4	2	1	2	8	5	3	4	3	2	6			3	3	5	4
	10		4		6	7	3	5	3	5	3	4	2	1	4	3	6	2	6				5	8	5
	1		5		2	6	7	8	4	5	4	2	3	4	2	3	0	1	9				4	4	4
	2		5		3	2	2	7	5	5	7	2	6	3	1		3	5	3				5		6
	5		5		5	3	6	9	6	5	1	6		4	4			4	2				5		4
	3		6		4	3	3	4	8	6	5	4		4	5			7	11				9		2
	6		3		5	3	4	4	3	3	1	4		1				3	4				3		5
	6		10		5	4	9	0	5	9	2	3		4
	4		4		3	6	6	6	4		3	8		3
	5		6		6	6	3	7	4		5			6
	5					2	3	3	5					5
	6					7	5	2	7
	4					2	2	4	0
	6					3	4		6
	8					0	4		5
	2					3	1		5
	8						7		11
	5						10		4
							3		3
							3		5
							11		4
Total SCEs	163	62	107	60	105	118	145	134	166	99	76	94	79	80	74	51	64	72	80	43	34	48	86	70	68	40	54
Total SCEs/number of chromosomes	5.43333	5.16667	4.86364	5.45455	4.77273	4.21429	4.39394	5.36	5.0303	4.95	3.45455	4.47619	4.9375	3.47826	4.35294	3.4	4	3.78947	4	4.77778	3.77778	3.69231	4.52632	4.66667	3.57895	4.44444	4.90909

## Sheet: WT
	WT
	Image 01	Image 02	Image 03	Image 04	Image 05	Image 06	Image 08	Image 09	Image 10	Image 11	Image 12	Image 13	Image 14	Image 15	Image 17	Image 18	Image 19	Image 20	Image 21	Image 28	Image 34	Image 38	Image 41
	0	1	0	1	3	0	1	3	0	3	0	0	1	0	0	0	2	2	2	0	0	1	2
	3	2	1	4	2	0	2	0	2	2	2	0	1	2	0	3	0	2	2	0	2	1	1
	2	0	3	1	1	1	1	3	0	1	0	0	2	1	0	1	0	2	1	3	2	1	1
	0	0	1	1	3	0	1	0	1	0	1	1	5	1	0	0	0	1	0	0	1	2	1
	2	1	0	3	2	1	0	3	0	0	0	0	0	0	1	0	0	1	0	0	0	1	3
	0	0	0	1	2	0	3	0	0	0	0	1	1	0	0	1	0	2	4	0	1	1	3
	0	1	0	1	1	0	2	1	0	1	2	0	2	0	0	0	1	0	2	2	0	1	1
	0	0	0	0	2	1	1	2	1	3	3	1	2	1	0	5	0	0	2	0	0	2	2
	0	0	4	0	2	0	3	0	2	3	2	0	2	1	0	0	0	0	1	0	1	0	0
	1	2	2	0	1	4	1	0	0	2	3	0	3	1	1	0	0	2	0	1	2	4	1
	0	0	2	0	0	2	3	2	0	0	2	0	1	0	1	1	0	2	1	1	1	3	2
	1	0	2	0	2	3	1	2	0	0	1	1	0	0	0	0	1	4	1	1	0	0	3
	2	0	3	0	1	0	0	1	0	5	0	1	0	0	0	0	1	0	0	0	0	5	3
	1	2	1	2	0	0	0	0	0	4	0	1	0	0	0	2	2	0	3	0	1	2	2
	1	0	1	0	3	0	0	3	0	0	0	0	1	1	1	1	1	0	0	0	0	1	0
	0	0	0	0	0	0	1	3	2	4	0	0	2	1	0	0	2	2	1	0	1	1	1
	1	0	1	1	0	0	0	2	0	0	2	2	0	2	2	0	0	0	1	0	0	2	0
	3	1	0	0	1	4	0	0	0	1	1	0	0	1	0	2	1	3	0	0	0	0	0
	2	1	0	0	0	0	0	1	0	0	2	1	1	2	1	3	0	3	0	1	0	2	1
	0	0	2	1	2	0	1	2	1	0	3	2	2	1	0	1	3	4	3	0	1	4	2
	0	0	1	2	1	1	0	0	0	1	0	0	2	2	0	0	4	0	0	0	2	1	0
	0	0	3	0	0		0	0	0	0	1	1	3	1	0	3	1	0	1	0	2	2	2
	1	0	0	0	2		1	1	1	1	2	0	1	0	0	0	0	0	3	0	0	0	1
	1	0	0	1	1		1	2	1	1	0	1	2	2	0	0		1	0	1	1	0	1
	0	0	0	0	1		2	1	0	1	2		3	1	1	1		0	0	1	1	0
	0	1	0	2	3		2		0	0	3		2	1	3	0		2	2	1		2
	0		2	1	1		3		0	1	1		1	0	0	1			3	2		1
	1		1	0	2		2		2	1	0		2	3	0	2			0			3
	1		1	2	0		0		3	2	1		0	0	1	3			0			1
	0		0	0	1		0		0	2	0		0	1	2	2			0			0
	1		0	1	3		1		1		2		1	0	0	1			1
	2		1	0	0		1		2		1		1	0	0	1			0
	2		2	3	1		3				2		0	0	0	0			3
	0		2	0	0		0				1		1		1	2
	0		0	0			0				2		1		0	0
	0			1			1				2		0		0	0
	0						1				0				2	1
	1										0					1
	2										0					0
	0										2					0
	0										1					1
	1										0
	1										0
	1										0
	1										0
	1										3
	3										1
	1
	1
	3
	0
	0
	0
	1
	1
Total SCEs	46	12	36	29	44	17	39	32	19	39	51	13	46	26	17	39	19	33	37	14	19	44	33
Total SCEs/number of chromosomes	0.836364	0.461538	1.02857	0.805556	1.29412	0.809524	1.05405	1.28	0.59375	1.3	1.08511	0.541667	1.27778	0.787879	0.459459	0.95122	0.826087	1.26923	1.12121	0.518519	0.76	1.46667	1.375

## Sheet: S144A
	S144A
	Image 02	Image 03	Image 04	Image 06	Image 07	Image 09	Image 10	Image 11	Image 12	Image 14	Image 15	Image 16	Image 17	Image 18	Image 20	Image 21
	0	1	0	1	3	1	0	1	0	0	2	3	1	4	2	2
	1	0	1	1	1	1	0	4	2	1	0	2	2	1	0	0
	1	1	1	2	0	0	0	1	1	0	0	1	0	1	1	0
	0	0	1	1	1	0	0	4	1	0	0	0	0	2	3	2
	0	2	5	1	1	0	2	1	3	2	2	0	1	0	0	1
	2	2	0	1	0	0	0	2	0	0	2	0	1	2	1	1
	1	0	2	0	1	1	0	0	1	1	0	2	5	3	2	0
	0	1	4	0	2	0	1	1	2	1	2	0	0	1	2	1
	1	3	1	0	0	1	1	4	0	0	4	0	1	1	3	2
	0	2	0	2	4	1	3	0	0	2	0	0	0	2	1	0
	1	2	2	1	0	0	1	1	2	1	0	0	1	1	2	0
	1	1	1	1	3	1	1	2	1	1	0	1	0	2	2	2
	0	0	0	3	2	1	0	1	1	0	1	0	0	2	1	4
	0	1	0	3	1	2	0	1	0	1	2	0	0	2	0	0
	2	0	1	1	0	0	1	0	0	0	4	0	0	1	1	0
	1	1	1	1	0	0	0	0	1	1	2	0	0	0	0	0
	1	1	1	0	1	0	1	0	0	0	1	0	0	1	2	0
	5	1	0	2	1	1	0	1	1	0	0	1	2	1	2	1
	2	1	0	1	0	1	0	0	2	2	0	0	0	2	1	1
	1	4	0	0	0	1	2	2	0	3	0	1	1	0	1	0
	4	0	0		1	2	0	0	1	4	2	2	0	1	1	0
	0	1	1		3	1	2	2	2	3	0	1	0	1	0	0
	0	1	0		0	1	1	1	1	1	1	3	0	2	1
	0	1	0		3	0	1	2	1	1		2	0	0	2
	2	1	0		2	2	0	1	1	0		1	0	0	1
	1	4	4		1	1	0	0	1	0			0	2	1
	2	0	2		1	2	1	2	3	0			0	2	2
	0	0	2		1	1	2	0	0	1			1	1	2
	1	2	2		0	1	3	0	0	1			0	4	2
	2	3	0		0	2	0	0	1	1			1	3	2
	1	1	1		2	0	1	1	1	0			0	4	3
	2	1	1		3	2	0	1	4	0			1	1	0
		0	2		1	1		0		2			0	2	1
					4	0		0					0	2	3
					2	0		1					0	1	0
					1	2		2					0	2	0
								1					1	2	0
								4							0
Total SCEs	35	39	34	22	38	27	24	36	34	28	25	20	18	50	44	17
Total SCEs/number of chromosomes	1.09375	1.18182	1.0303	1.1	1.02703	0.72973	0.75	0.947368	1.0625	0.848485	1.08696	0.8	0.486486	1.35135	1.15789	0.772727
