# Supplementary material for: Centromere protection requires strict mitotic inactivation of the Bloom syndrome helicase complex
Source: Research Square preprint supplement (doi:10.21203/rs.3.rs-4420374/v1), 2024-05-30
Supplement: Supplementary file 55 [file Fig S5C, 3D. Mitotic phosphorylation UFB-binding complex 2023.xlsx]

## Sheet: Fig S5B pBLM 
	BLM	Phosphopeptides	PLK1 Motif	BI2536	Nocodazole	Nocodazole	Noscapine	Nocodazole	Nocodazole	BI4834	BI2536	TAL / shRNA						PLK1i	Mitotic-arrested cells					PLK1 inhibition/depletion
	S26	TLNNKLSLSKPKFSGFT													BLM	Phosphopeptides	PLK1 Motif	BI2536	Nocodazole	Nocodazole	Noscapine	Nocodazole	Nocodazole	BI4834	BI2536	TAL / shRNA
	S48	SDNNVSVTNVSVAKTPVL	Yes			Mitotic	Mitotic				Sensitive to PLK1i				S26	TLNNKLSLSKPKFSGFT
	T50	SDNNVSVTNVSVAKTPVL									Sensitive to PLK1i				S48	SDNNVSVTNVSVAKTPVL	Yes			Mitotic	Mitotic				Dephosphorylated
	S53	SDNNVSVTNVSVAKTPVL	Yes			Mitotic					Sensitive to PLK1i				T50	SDNNVSVTNVSVAKTPVL									Dephosphorylated
	S72	RNKDVNVTEDFSFSEPLPNT	Yes			Mitotic									S53	SDNNVSVTNVSVAKTPVL	Yes			Mitotic					Dephosphorylated
	S269	HLEDERDNSEKKKNLEE	Yes	Induced by PLK1i					Mitotic						S72	RNKDVNVTEDFSFSEPLPNT	Yes			Mitotic
	S282	NLEEAELHSTEKVPC		Sensitive to PLK1i			Mitotic								S269	HLEDERDNSEKKKNLEE	Yes	Phosphorylated					Mitotic
	S336	DTSDRKEDVLSTSKDLL	Yes									Sensitive to PLK1i			S282	NLEEAELHSTEKVPC		Dephosphorylated			Mitotic
	T337	DTSDRKEDVLSTSKDLL						Mitotic				Sensitive to PLK1i			S336	DTSDRKEDVLSTSKDLL	Yes									Dephosphorylated
	S338	DTSDRKEDVLSTSKDLL		Sensitive to PLK1i				Mitotic				Sensitive to PLK1i			T337	DTSDRKEDVLSTSKDLL						Mitotic				Dephosphorylated
	S358	MSMQELNPETSTDCDARQ	Yes			Mitotic	Mitotic								S338	DTSDRKEDVLSTSKDLL		Dephosphorylated				Mitotic				Dephosphorylated
	S367	STDCDARQISLQQQLIHVM	Yes	Sensitive to PLK1i											S358	MSMQELNPETSTDCDARQ	Yes			Mitotic	Mitotic
	S422	LTEVDFNKSDASLLGSLWRY	Yes	Induced by PLK1i	Mitotic	Mitotic		Mitotic							S367	STDCDARQISLQQQLIHVM	Yes	Dephosphorylated
	S464	SHLPSNSVSPGDCLL		Induced by PLK1i				Mitotic		Induced by PLK1i	Mitotic				S422	LTEVDFNKSDASLLGSLWRY	Yes	Phosphorylated	Mitotic	Mitotic		Mitotic
	S539	KDQNKHTASINDLER	Yes	Sensitive to PLK1i			Mitotic	Mitotic		Sensitive to PLK1i	Sensitive to PLK1i				S464	SHLPSNSVSPGDCLL		Phosphorylated				Mitotic		Phosphorylated	Mitotic
	S1083	TRDVTDDVKSIVRFVQE										Sensitive to PLK1i			S539	KDQNKHTASINDLER	Yes	Dephosphorylated			Mitotic	Mitotic		Dephosphorylated	Dephosphorylated
	S1310	SSPGISLSSSRGPGRSAAEELD				Mitotic		Mitotic	Mitotic		Sensitive to PLK1i				S1083	TRDVTDDVKSIVRFVQE										Dephosphorylated
					Nousiainen , 2006. PNAS	Dephoure, PNAS. 2008	Malik, 2009.JPR	Olsen, 2010. Sci Signal	Hegemann, 2011. Sci Signal	Grosstessner-Hain, 2011. MCP	Kettenbach, 2011 Sci Signal	Santamaria, 2011.MCP			S1310	SSPGISLSSSRGPGRSAAEELD				Mitotic		Mitotic	Mitotic		Dephosphorylated
					D/E-X-S/T(p)	[D/E]-X-[pS/pT]-Φ-X-[D/E]	D/E-X-S/T(p)				[D/E]Xp[S/T][FLIYWVM]	L(Φ)(E/N/D(Q))X(S/T)L(Φ).
											(NXp[S/T] and LNXp[S/T])
				References phosphositeplus
			1	Nousiainen M, et al. (2006) Phosphoproteome analysis of the human mitotic spindle. Proc Natl Acad Sci U S A 103, 5391-6
			2	Dephoure N, et al. (2008) A quantitative atlas of mitotic phosphorylation. Proc Natl Acad Sci U S A 105, 10762-7
			3	Malik R, et al. (2009) Quantitative analysis of the human spindle phosphoproteome at distinct mitotic stages. J Proteome Res 8, 4553-63
			4	Olsen JV, et al. (2010) Quantitative phosphoproteomics reveals widespread full phosphorylation site occupancy during mitosis. Sci Signal 3, ra3
			5	Grosstessner-Hain K, et al. (2011) Quantitative phospho-proteomics to investigate the polo-like kinase 1-dependent phospho-proteome. Mol Cell Proteomics 10, M111.008540
			6	Hegemann B, et al. (2011) Systematic phosphorylation analysis of human mitotic protein complexes. Sci Signal 4, rs12
			7	Kettenbach AN, et al. (2011) Quantitative phosphoproteomics identifies substrates and functional modules of aurora and polo-like kinase activities in mitotic cells. Sci Signal 4, rs5
			8	Santamaria A, et al. (2011) The Plk1-dependent phosphoproteome of the early mitotic spindle. Mol Cell Proteomics 10, M110.004457
			9	Sharma K, et al, (2014) Ultradeep human phosphoproteome reveals a distinct regulatory nature of Tyr and Ser/Thr-based signaling. Cell Reports.Sep;8(5):1583-1594. 25159151.
				-3	-2	-1	0	1	2	3	Ref.
			PLK1		D/E	X	pS/pT				18
					D/E	X	pS/pT	Φ	X	D/E	2
				L	D/E(N)	X	pS/pT	F			7
				L(Φ)	E/N/D(Q)	X	pS/pT	L(Φ)			8

## Sheet: Fig 3D BTRR Phosphorylation
							Consensus Motif										Φ = G,A,V,C,P,L,I,M,W,F,Y
	AF2	BLM	Sequence [pS/pT]	Consensus	Ref.		Kinase	-3	-2	-1	0	1	2	3	Ref.
		S17	LERHSARTL		9		PLK1		D/E	X	pS/pT				18		Classical
		T20	HSARTLNNK						D/E	X	pS/pT	Φ	X	D/E	2		Broaden
		S26	NNKLSLSKP	PLK1/Aurora	8,9			L	D/E(N)	X	pS/pT	F			7
		S28	KLSLSKPKF		4,9			L(Φ)	E/N/D(Q)	X	pS/pT	L(Φ)			8
		S33	KPKFSGFTF	Aurora	9		CDK1				pS/pT	P			19		Minimal
		T36	FSGFTFKKK								pS/pT	P	X	(X)K/R	2,20		Optimal
		S43	KKTSSDNNV		7		Aurora		K/R	X	pS/pT				8
		S48	DNNVSVTNV	PLK1	2,3,7,8			K/R	K/R	X(K/R)	pS/pT				7
		T50	NVSVTNVSV		7			K/R/N	R	X	pS/pT	Φ			2
		S53	VTNVSVAKTP	PLK1	2,7,9
		T57	SVAKTPVLR	CDK1	2,7		PLK1	Φ-[D/E(N/Q)]-X-[pS/pT]-Φ-X-[D/E]
		T68	DVNVTEDFS		7		CDK1	[pS/pT]-P-X-[K/R]
		S72	TEDFSFSEP	Aurora/PLK1	2,7,9		Aurora	K/R/N-[K/R]1–2X-[pS/pT]-Φ
		S74	DFSFSEPLP		9
		T114	DFLQTPKEVV	CDK1	2,7,8,9
		T125	TTQNTPTVK	CDK1	3,7,8,9
		S144	EFSSSPDSL	CDK1	2,11,17
		S168	ETSKSFVTP		4,9
		T171	KSFVTPPQS	CDK1	4,8,9,16
		S175	TPPQSHFVR		16
		T182	VRVSTAQKS		16
		S269	ERDNSEKKK	PLK1	5,6,9
		S282	AELHSTEKV		7,8,9
		S304	FVPPSPEEI	CDK1	9,11,14,17
		S336	EDVLSTSKD	PLK1	8			References phosphositeplus
		T337	DVLSTSKDL		4,8		1	Nousiainen M, et al. (2006) Phosphoproteome analysis of the human mitotic spindle. Proc Natl Acad Sci U S A 103, 5391-6
		S338	VLSTSKDLL		4,7,9,13,14		2	Dephoure N, et al. (2008) A quantitative atlas of mitotic phosphorylation. Proc Natl Acad Sci U S A 105, 10762-7
		S358	NPETSTDCD	PLK1	2,3,7		3	Malik R, et al. (2009) Quantitative analysis of the human spindle phosphoproteome at distinct mitotic stages. J Proteome Res 8, 4553-63
		S412	RKLLTEVDF		7		4	Olsen JV, et al. (2010) Quantitative phosphoproteomics reveals widespread full phosphorylation site occupancy during mitosis. Sci Signal 3, ra3
		S419	DFNKSDASL	PLK1	1,2,4,9		5	Grosstessner-Hain K, et al. (2011) Quantitative phospho-proteomics to investigate the polo-like kinase 1-dependent phospho-proteome. Mol Cell Proteomics 10, M111.008540
		S422	KSDASLLGS	PLK1	1,2,4,7,9		6	Hegemann B, et al. (2011) Systematic phosphorylation analysis of human mitotic protein complexes. Sci Signal 4, rs12
		S464	SNSVSPGDC	CDK1	7,9		7	Kettenbach AN, et al. (2011) Quantitative phosphoproteomics identifies substrates and functional modules of aurora and polo-like kinase activities in mitotic cells. Sci Signal 4, rs5
		T508	NWAETPRLG	CDK1	7,8,9		8	Santamaria A, et al. (2011) The Plk1-dependent phosphoproteome of the early mitotic spindle. Mol Cell Proteomics 10, M110.004457
		S517	KKNESSYFP	Aurora			9	Sharma K, et al, (2014) Ultradeep human phosphoproteome reveals a distinct regulatory nature of Tyr and Ser/Thr-based signaling. Cell Reports.Sep;8(5):1583-1594. 25159151.
		S539	KHTASINDL	PLK1	3,4,5,7,9
		S550	ETQPSYDID		2			Other references
		S601	SERLSSAKT	Aurora	3,8,9		10	Bayart E, et al. (2006) The Bloom syndrome helicase is a substrate of the mitotic Cdc2 kinase. Cell Cycle 5, 1681-6
		S646	ERFQSLSFP		9,12		11	Leng M, et al. (2006) MPS1-dependent mitotic BLM phosphorylation is important for chromosome stability. Proc Natl Acad Sci U S A 103, 11485-90
		S706	PACVSPGVTV	CDK1			12	Kaur, S., Modi, P., Srivastava, V., Mudgal, R., Tikoo, S., Arora, P., Mohanty, D., & Sengupta, S. (2010). Chk1-dependent constitutive phosphorylation of BLM helicase at serine 646 decreases after DNA damage. Molecular cancer research : MCR, 8(9), 1234–1247. https://doi.org/10.1158/1541-7786.MCR-10-0233
		S714	TVVISPLRS	CDK1	10		13	Wang, J., Chen, J., & Gong, Z. (2013). TopBP1 controls BLM protein level to maintain genome stability. Molecular cell, 52(5), 667–678. https://doi.org/10.1016/j.molcel.2013.10.012
		T766	LLYVTPEKI	CDK1	10		14	Blackford, A. N, et al, (2015). TopBP1 interacts with BLM to maintain genome stability but is dispensable for preventing BLM degradation. Molecular cell, 57(6), 1133–1141. https://doi.org/10.1016/j.molcel.2015.02.012
		S1083	DDVKSIVRF	Aurora	8		15	Xu, C., Wang, Y., Wang, L., Wang, Q., Du, L. Q., Fan, S., Liu, Q., & Li, L. (2015). Accumulation and Phosphorylation of RecQ-Mediated Genome Instability Protein 1 (RMI1) at Serine 284 and Serine 292 during Mitosis. International journal of molecular sciences, 16(11), 26395–26405. https://doi.org/10.3390/ijms161125965
		S1290	SEWTSPAED	CDK1	11		16	Kharat SS, et al. (2016) Mitotic phosphorylation of Bloom helicase at Thr182 is required for its proteasomal degradation and maintenance of chromosomal stability. Oncogene 35, 1025-38
		S1295	PAEDSSPGI	PLK1	2,6,7,9		17	Pogliano, C. B. et al. (2022) The CDK1-TOPBP1-PLK1 axis regulates the Bloom’s syndrome helicase BLM to suppress crossover recombination in somatic cells. Sci. Adv, vol. 8,5
		S1296	AEDSSPGIS	CDK1	2,4,6,7,8,9,11		18	Nakajima, H., Toyoshima-Morimoto, F., Taniguchi, E., and Nishida, E. (2003) Identification of a consensus motif for Plk (Polo-like kinase) phos- phorylation reveals Myt1 as a Plk1 substrate. J. Biol. Chem. 278, 25277–25280
		S1303	ISLSSSRGP		2		19	Nigg E. A. (1993). Cellular substrates of p34(cdc2) and its companion cyclin-dependent kinases. Trends in cell biology, 3(9), 296–301. https://doi.org/10.1016/0962-8924(93)90011-o
		S1304	SLSSSRGPG		7		20	Errico, A., Deshmukh, K., Tanaka, Y., Pozniakovsky, A., & Hunt, T. (2010). Identification of substrates for cyclin dependent kinases. Advances in enzyme regulation, 50(1), 375–399. https://doi.org/10.1016/j.advenzreg.2009.12.001
		S1310	GPGRSAAEE		2,4,6,7,9
		S1375	TKSSSIIGS	Aurora/PLK1	7
		S1383	SSSASHTSQ		7
		S1417	LKPSYAFS*		9
	AF2	TOP3A	Sequence [pS/pT]	Consensus	Ref.
		S54	ADLLSNGRM		2
		T182	FSEITPHAV	CDK1
		T384	VEQQTPDPR	CDK1
		S403	RGGPTPRNG	CDK1
		T455	GQETTVEID	PLK1
		S513	DGETSPPKL	CDK1
		T554	YVGLTPDKR	CDK1
		S703	RDSSVCP	PLK1
		T743	GCDDTLREI	PLK1
		S760	PPRASQPSG	Aurora
		S771	QANQSLNRM	PLK1	2,7,9
		S778	RMDNSQHPQ	PLK1
		S851	LWADSPNPG	CDK1
	AF2	RMI1	Sequence [pS/pT]	Consensus	Ref.
		T112	GKNTTNDLV
		T123	EAQVTPKPW	CDK1	9
		S132	EAKPSRMLM
		S219	DLVVSVIPN	PLK1	7
		S225	IPNNSNENI	PLK1	2,4,7,9
		S250	ELLASLDEN	PLK1
		S264	NNDTSSERC
		T277	SSSNTIPTR
		T280	NTIPTRQSS
		S283	PTRQSSFEP	Aurora
		S284	TRQSSFEPE	PLK1	4,9,15
		S292	EFVISPRPK	CDK1	7,9,15
		S348	NADRSIERF	PLK1
		T359	NPNTTNNFS	PLK1	7,9
		S363	TNNFSLTCK	PLK1	7,9
		T383	SEQMTNEDK	PLK1	7
		S388	NEDKSFGCP	PLK1	7,9
		S400	DQNRSIFSV	PLK1	9
		S437	SDSGSLNNK	PLK1
		S456	QKRSSQISN	Aurora
		S477	SSENSINLS	PLK1
		S481	SINLSIAMD	PLK1
		S488	MDLYSPPFV	CDK1
		S524	NLSSSGGIW

## Sheet: MS ICR Phospho peptides
GFP-BLM IP	Master Protein Descriptions	Annotated Sequence	Modifications in Master Proteins	BLM NOC	BLM + BI2536	S144A NOC	BLM+BI / BLM NOC	S144A NOC/ BLM NOC
	GFP_TOP3A	[R].GSLPPTMPLEFVCCIGGCDDTLR.[E]	GFP_TOP3A 1xPhospho [T966(99.2)]	0.756666		0.390028	-0.756666	-0.366637
	GFP_BLM	[R].QISLQQQLIHVMEHICK.[L]	GFP_BLM 1xPhospho [S614(100)]; GFP_BLM_S144A 1xPhospho [S614(100)]	0.12924	-0.379841	0.186196	-0.509081	0.0569561
	GFP_BLM	[R].TNQLEAINAALLGEDCFILMPTGGGK.[S]	GFP_BLM 1xPhospho [T938(100)]; GFP_BLM_S144A 1xPhospho [T938(100)]	0.0154717	0.0512752	-0.0693947	0.0358035	-0.0848664
	GFP_BLM	[K].SFVTPPQSHFVR.[V]	GFP_BLM 1xPhospho [T418(100)]; GFP_BLM_S144A 1xPhospho [T418(100)]	-0.0282329	0.124671	-0.106063	0.152904	-0.0778302
	GFP_BLM	[R].TNQLEAINAALLGEDCFILMPTGGGK.[S]	GFP_BLM 1xPhospho [T938(100)]; GFP_BLM_S144A 1xPhospho [T938(100)]	-0.0714233	0.130985	-0.0690576	0.202408	0.00236577
	GFP_BLM	[K].SFVTPPQSHFVR.[V]	GFP_BLM 1xPhospho [T418(100)]; GFP_BLM_S144A 1xPhospho [T418(100)]	-0.171016	0.177705	-0.0281167	0.348721	0.142899
	RMI1	[R].VTDVLDPALGPSDEELLASLDENDELTANNDTSSER.[C]	Q9H9A7 1xPhospho [S/T]	-0.199602	0.290585	-0.1423	0.490187	0.0573023
GFP-TOP3A IP	Master Protein Descriptions	Annotated Sequence	Modifications in Master Proteins	TOP3A	TOP3A + BI2536	Difference
	GFP_TOP3A	[R].LQANQSLNR.[M]	GFP_TOP3A 1xPhospho [S1009(100)]	0.757358	-1.69149	-2.44885
	GFP_TOP3A	[R].ASSSDMGSTAK.[K]	GFP_TOP3A 1xPhospho [S1208(100)]	0.158991	-0.178708	-0.337699
	GFP_TOP3A	[R].ASSSDMGSTAK.[K]	GFP_TOP3A 1xPhospho [S/T]	0.0462114	-0.0477407	-0.0939521
	GFP_TOP3A	[K].KLDEALAQYFGNGTELAQQEDIYPAMPEPIR.[K]	GFP_TOP3A 1xPhospho [T877(100)]	0.0419274	-0.0431825	-0.0851099
	RMI1	[R].QSSFEPEFVISPRPK.[E]	Q9H9A7 1xPhospho [S292(100)]	-0.099076	0.092707	0.191783
	GFP_BLM	[K].THLEDERDNSEK.[K]	GFP_BLM 1xPhospho [S516(100)]	-0.622993	0.433683	1.05668
	GFP_BLM	[K].THLEDERDNSEK.[K]	GFP_BLM 1xPhospho [S516(100)]	-0.681683	0.46107	1.14275
		BLM
	Dephosphorylated	S367	[R].QISLQQQLIHVMEHICK.[L]
		T691	[R].TNQLEAINAALLGEDCFILMPTGGGK.[S]
		T171	[K].SFVTPPQSHFVR.[V]
	Phosphorylated	S269	[K].THLEDERDNSEK.[K]
		TOP3A
	Dephosphorylated	T728	[R].GSLPPTMPLEFVCCIGGCDDTLR.[E]
	Dephosphorylated	S771	[R].LQANQSLNR.[M]
		S970	[R].ASSSDMGSTAK.[K]
		T639	[K].KLDEALAQYFGNGTELAQQEDIYPAMPEPIR.[K]
		RMI1
		243, 250, 258, 263, 264, 265	[R].VTDVLDPALGPSDEELLASLDENDELTANNDTSSER.[C]
		283, 284, 292	[R].QSSFEPEFVISPRPK.[E]

## Sheet: m-MS Phosphoproteomics_Summary 
	1, Dephoure N, et al. (2008) A quantitative atlas of mitotic phosphorylation. Proc Natl Acad Sci U S A 105, 10762-7
	Table S1. HeLa cells arrested in Nocodazole. Phosphopeptides identified in M-phase cells.
	Protein Name	Mitosis	sites	Peptide	local_13	Ascore
	BLM	4	48	TSSDNNVS#VTNVS#VAKT#PVLR	SSDNNVSVTNVSV	30.7
	BLM	4	53	TSSDNNVS#VTNVS#VAKT#PVLR	VSVTNVSVAKTPV	17.57
	BLM	7	57	TSSDNNVS#VTNVS#VAKT#PVLR	NVSVAKTPVLRNK	83.56
	BLM	1	72	NKDVNVTEDFS#FSEPLPNTTNQQR	NVTEDFSFSEPLP	15.07
	BLM	1	114	SLLPDFLQT#PK	LPDFLQTPKEVVC	95.25
	BLM	1	358	MSMQELNPETS#TDCDAR	ELNPETSTDCDAR	24.44
	BLM	1	412	LLT#EVDFNKSDAS#LLGSLWR	IRRKLLTEVDFNK	0
	BLM	1	419	LLTEVDFNKS#DAS#LLGSLWR	EVDFNKSDASLLG	35.63
	BLM	2	422	LLTEVDFNKS#DAS#LLGSLWR	FNKSDASLLGSLW	78.69
	BLM	2	550	ETQPS#YDIDNFDIDDFDDDDDWEDIMHNLAASK	ERETQPSYDIDNF	13.12
	BLM	3	551	ETQPSY#DIDNFDIDDFDDDDDWEDIMHNLAASK	RETQPSYDIDNFD	14.49
	BLM	2	1295	YSEWTSPAEDS#S#PGISLSS#SRGPGR	TSPAEDSSPGISL	54.84
	BLM	2	1296	YSEWTSPAEDS#S#PGISLSS#SRGPGR	SPAEDSSPGISLS	40.63
	BLM	1	1303	YSEWTSPAEDS#S#PGISLSS#SRGPGR	PGISLSSSRGPGR	0
	BLM	1	1304	YSEWTSPAEDS#S#PGISLSSS#RGPGR	GISLSSSRGPGRS	8.38
	BLM	4	1310	S#AAEELDEEIPVSSHYFASK	SRGPGRSAAEELD	117.65
	TOP3A	2	771	LQANQS#LNR	RLQANQSLNRMDN	500
	Table S5 - sheet 2. Sites phosphorylated in M-phase containing Polo-like kinase 1 motif.
	Protein	Motif Site	Motif	Φ = [F/I/L/M/V/W/Y]
	BLM	S422	DAS#LLG	D/E]-X-[pS/pT]-Φ
	BLM	S72	DFS#FSE	[D/E]-X-[pS/pT]-Φ-X-[D/E]
	Motif discovery analysis of the up-regulated mitotic sites yielded many pS-P motifs and two motifs similar to those phosphorylated by AurA and PLK1.
	Polo-like kinase 1, [D/E]-X-pS-X-[D/E]-[D/E] [with a bias for L at +1, consensus = [D/E]-X-[pS/pT]-Φ-X-[D/E].
	Aurora kinase A, [K/R]-[K/R]-X-pS [with a bias for L at +1, consensus = [K/N/R]-R-X-[pS/pT]-Φ
	2, Kettenbach AN, et al. (2011) Quantitative phosphoproteomics identifies substrates and functional modules of aurora and polo-like kinase activities in mitotic cells. Sci Signal 4, rs5
	HeLa cells arrested G1/S with DTB, arrested in metaphase with Taxol and added the inhibitors for 45 min in the presence of the proteasome-blocking agent MG132 (to prevent protein degradation, which also prevents mitotic exit)
		Inhibitors	MLN8054: which at lower concentrations is selective for Aurora A, but at higher concentrations also inhibits Aurora B,
			ZM447439 and AZD1152: Aurora B
			BI2536: Plk1
	Table S1. Phosphopepdites identified in mitosis
		Mitosis?	P-Site	Representative Peptide	ModSite
	BLM	Yes	S28	K.LSLS#KPK.F	P54132_(S26,S28)
	BLM	Yes	S48:S53:T57	K.TSSDNNVS#VTNVS#VAKT#PVLR.N	P54132_(S48,T50:S53:T57)
	BLM	Yes	T50:T57	K.TSSDNNVSVT#NVSVAKT#PVLR.N	P54132_(S48,T50:T57)
	BLM	Yes	S53:T57	K.KTSSDNNVSVTNVS#VAKT#PVLR.N	P54132_(S53:T57)
	BLM	Yes	T57	K.TSSDNNVSVTNVSVAKT#PVLR.N	P54132_(T57)
	BLM	Yes	T68:S72	R.NKDVNVT#EDFS#FSEPLPNTTNQQR.V	P54132_(T68:S72)
	BLM	Yes	S74	R.NKDVNVTEDFSFS#EPLPNTTNQQR.V	P54132_(S72,S74)
	BLM	Yes	T114:T127	K.SLLPDFLQT#PKEVVCTTQNTPT#VK.K	P54132_(T114:T125,T127)
	BLM	Yes	T122:S131	K.EVVCTT#QNTPTVKKS#R.D	P54132_(T122:S131)
	BLM	Yes	T125	K.EVVCTTQNT#PT#VKKSR.D	P54132_(T125)
	BLM	Yes	S464	K.ELNFSHLPSNSVS#PGDCLLTTT#LGK.T	P54132_(S464)
	BLM	Yes	T508	K.SFVSSNWAET#PR.L	P54132_(T508)
	BLM	Yes	S539	K.HTAS#INDLER.E	P54132_(S539)
	BLM	Yes	S1310	R.S#AAEELDEEIPVSSHYFASK.T	P54132_(S1310)
	BLM	Yes	S1375	K.SSS#IIGSSSASHTSQATSGANSK.L	P54132_(S1375)
	TOP3A	Yes	S771	R.LQANQS#LNR.M	Q13472_(S771)
	PICH	Yes	S14	R.RFPEAEALS#PEQAAHYLR.Y	Q2NKX8_(S14)
	PICH	Yes	T740	R.NEGAWLREPVFPSST#KK.K	Q2NKX8_(S738,S739,T740)
	PICH	Yes	S774:S790	K.M*AS#VVIDDLPKEGEKQDLS#SIK.V	Q2NKX8_(S774:S790)
	PICH	Yes	S791	K.EGEKQDLSS#IKVNVT#TLQDGK.G	Q2NKX8_(S790,S791)
	PICH	Yes	S807:S810	K.VNVTTLQDGKGTGS#ADS#IAT#LPK.G	Q2NKX8_(T805,S807:S810)
	PICH	Yes	S810:T813	K.GTGSADS#IAT#LPK.G	Q2NKX8_(S810:T813)
	PICH	Yes	S807:S810:T813	K.VNVTTLQDGKGTGS#ADS#IAT#LPK.G	Q2NKX8_(S807:S810:T813)
	PICH	Yes	S820	K.GFGS#VEELCTNSS#LGMEKS#FATKNEAVQK.E	Q2NKX8_(S820)
	PICH	Yes	S820:S829	K.GFGS#VEELCTNSS#LGMEKS#FATKNEAVQK.E	Q2NKX8_(S820:S829)
	PICH	Yes	S872	K.S#TKADIGPNLDQLKDDEILR.H	Q2NKX8_(S872,T873)
	PICH	Yes	S1069	K.NDIS#PPGR.F	Q2NKX8_(S1069)
	PICH	Yes	S1098	R.S#LINM*VLDHVEDMEER.L	Q2NKX8_(S1098)
	Table S3. ModSites assigned to the Plk substrate cluster (+ BI2536: cells arrested at metaphase (BI mitosis) and cells entering mitosis (BI entry). HeLa cells + BI2536 (0.1 µM).
	Analysis for Plk targets by extracting ModSites from data collection that were present in each control (Taxol-arrested but not exposed to inhibitor), MLN0.25, MLN1, MLN5, and AZDZM condition,
	and had a ≥2.5-fold reduction (log2 ratio ≥−1.4) in ratio in either BI2536 treatment of cells entering mitosis (BI entry) or BI2536 treatment of cells arrested in mitosis (BI mitosis) relative to uninhibited cells.
	Protein	ModSite	Log2 ratios:	Tax	BI-ENTRY	BI-MITOSIS
	BLM	P54132_(S48,T50:S53:T57)		-0.03	-5.387	-6.218
	BLM	P54132_(S48,T50:T57)		0.063	-3.028	-3.829
	BLM	P54132_(S539)		-0.073	-3.128	-3.27
	BLM	P54132_(S579,S580,T581)		-0.239	-3.692	-4.648
	BLM	P54132_(S1310)		-0.141	-1.522	-0.948
	TOP3A	Q13472_(S771)		-0.143	-3.922	-4.335
	PICH	Q2NKX8_(T805,S807:S810)		-0.032	-3.749	1.599
	RMI1	Q9H9A7_(S388)		-0.129	-4.502	-8.087
	RMI1	Q9H9A7_(S225)		-0.181	-2.982	-0.241
	Table S5. ModSite assignments to Plk clusters. (Given that only Taxol and the two BI2536 treatments were necessary to identify candidate Plk substrates, we added ModSites to this group that had ratios that fit the strict >2.5-fold inhibition requirement in either or both BI2536 conditions and adhered to a motif for that cluster).
		ModSite	BI-ENTRY	BI-MITOSIS	one representative peptide for the ModSite	Motif?	Olsen, 2010	Dephoure, 2008	Protein in Plk1 IP?
	BLM	P54132_(S48,T50:T57)	-3.028	-3.829	K.TSSDNNVS#VTNVSVAKT#PVLR.N	Yes	No	Yes	Yes
	BLM	P54132_(S53:T57)	-2.731	-3.12	K.TSSDNNVSVTNVS#VAKT#PVLR.N	Yes	No	Yes	Yes
	BLM	P54132_(S48,T50:S53:T57)	-5.387	-6.218	K.TSSDNNVS#VTNVS#VAKT#PVLR.N	Yes	No	Yes	Yes
	BLM	P54132_(S539)	-3.128	-3.27	K.HTAS#INDLER.E	No	Yes	No	Yes
	BLM	P54132_(S579,S580,T581)	-3.692	-4.648	K.SS#TAAYQPIK.E	No	No	No	Yes
	BLM	P54132_(S1310)	-1.522	-0.948	R.S#AAEELDEEIPVSSHYFASK.T	No	Yes	Yes	Yes
	TOP3A	Q13472_(S771)	-3.922	-4.335	R.LQANQS#LNR.M	Yes	No	Yes	Yes
	PICH	Q2NKX8_(T805,S807:S810)	-3.749	1.599	K.GTGS#ADS#IATLPK.G	No	Yes	No	Yes
	PICH	Q2NKX8_(S864)	-6.415	-6.676	K.ETLQEGPKQEALQEDPLES#FNYVLSK.S	Yes	No	No	Yes
	PICH	Q2NKX8_(S864)	-6.415	-6.676	K.ETLQEGPKQEALQEDPLES#FNYVLSK.S	Yes	No	No	Yes
	RMI1	Q9H9A7_(S219:S225)	-2.719	-4.998	R.LIGEPDLVVS#VIPNNS#NENIPR.V	Yes	Yes	Yes	Yes
	RMI2	Q9H9A7_(S225)	-2.982	-0.241	R.LIGEPDLVVSVIPNNS#NENIPR.V	Yes	Yes	Yes	Yes
	RMI3	Q9H9A7_(S388)	-4.502	-8.087	K.NVSEQMTNEDKS#FGCPSVR.D	Yes	No	No	Yes
	Motif analysis revealed not only the canonical Plk1 motif [D/E]Xp[S/T][FLIYWVM] but also several variations of this motif with an absolute requirement for an asparagine in the −2 position (NXp[S/T] and LNXp[S/T]) instead of an aspartic or glutamic acid.
	We also identified another distinct potential Plk recognition motif with only phenylalanine in the +1 position (p[S/T]F) that appeared to be sufficient for Plk targeting without any additional preference upstream of the phosphorylation site, as well as a more specific variant of this phenylalanine-based motif (DXp[S/T]F).
	4, Santamaria A, et al. (2011) The Plk1-dependent phosphoproteome of the early mitotic spindle. Mol Cell Proteomics 10, M110.004457
	Plk1 can be broadened to L(Φ)(E/N/D(Q))X(S/T)L(Φ).
	Table S3, Downregulated phosphorylation sites identified on spindle proteins upon Plk1 inactivation (HeLa cells presynchronised with STB and released into TAL or induce depletion).
			Inhibitor (small molecule inhibitor TAL: ZK-thiazolidinone)		shRNA (shPlk1/shEg5)
	Protein Names	Position of the phosph. Residue	Inhi 1_Mascot Score	Inhi 2_Mascot Score	RNAi 1_Mascot Score	RNAi 2_Mascot Score
	BLM	336		21.73		17.86
	BLM	337		21.73		17.86
	BLM	338		21.73		17.86
	BLM	1083	20.44
	PICH	14				32.94
	PICH	774				46.31
	PICH	790				16.68
	PICH	791				16.68
	PICH	805	12.73		37.05
	PICH	807	12.73		37.05
	PICH	995			25.46
	9. Grosstessner-Hain K, et al. (2011) Quantitative phospho-proteomics to investigate the polo-like kinase 1-dependent phospho-proteome. Mol Cell Proteomics 10, M111.008540
	HeLa cells were synchronised with DTB (2mM), 7 hours release and arrested with 330nM Nocodazole for 3hours + inhibition of 250 nM with BI4834
		Regulation category	P-site position	Median ratio	Log2 (Median ratio)	Peptide	15-mer (for Phosphosite Plus)	15-mer (for Scansite)	Listed in PhosphoSite Plus
	BLM	BI 4834 sensitive 2	539	0.0708	-3.82011	HTAS#INDLER	DQNKHTAsINDLERE	DQNKHTASINDLERE
	BLM	BI 4834 induced 2	464	3.04	1.60407	ELNFSHLPSNSVS#PGDCLLTTTLGK	HLPSNSVsPGDCLLT	HLPSNSVSPGDCLLT	YES
	PICH	BI 4834 sensitive 2	158	0.485	-1.04394	IIEQLS#PQAATSR	NKIIEQLsPQAATSR	NKIIEQLSPQAATSR	YES
	PICH	BI 4834 sensitive 2	805	0.194	-2.36587	GT#GSADS#IAT#LPK	TLQDGKGtGSADSIA	TLQDGKGTGSADSIA	YES
	PICH	BI 4834 sensitive 2	810	0.194	-2.36587	GT#GSADS#IAT#LPK	KGTGSADsIATLPKG	KGTGSADSIATLPKG	YES
	PICH	BI 4834 sensitive 2	813	0.194	-2.36587	GT#GSADS#IAT#LPK	GSADSIAtLPKGFGS	GSADSIATLPKGFGS	YES
	PICH	BI 4834 sensitive 2	810	0.247	-2.01742	GTGS#ADS#IAT#LPK	KGTGSADsIATLPKG	KGTGSADSIATLPKG	YES
	PICH	BI 4834 sensitive 2	807	0.247	-2.01742	GTGS#ADS#IAT#LPK	QDGKGTGsADSIATL	QDGKGTGSADSIATL	YES
	PICH	BI 4834 sensitive 2	813	0.247	-2.01742	GTGS#ADS#IAT#LPK	GSADSIAtLPKGFGS	GSADSIATLPKGFGS	YES
	6 Hegemann B, et al. (2011) Systematic phosphorylation analysis of human mitotic protein complexes. Sci Signal 4, rs12
	HeLa cells arrested in mitosis with Nocodazole 100 µg/ml for 18 hours,
	Symbol	Psite	Psite_SeqNeighb_4_Scansite	Psite_SeqNeighb_PsitePlus	Found_in_PsitePlus	Ascores	Ascores_max	Ascores_min
	BLM	S269	LEDERDNSEKKKNLE	LEDERDNsEKKKNLE	0	105.31	105.31	105.31
	BLM	S1295	WTSPAEDSSPGISLS	WTSPAEDsSPGISLS	1	35.28	35.28	35.28
	BLM	S1296	TSPAEDSSPGISLSS	TSPAEDSsPGISLSS	1	39.8	39.8	39.8
	BLM	S1310	SSRGPGRSAAEELDE	SSRGPGRsAAEELDE	1	70.49	70.49	70.49
	PICH	S697	ELDMLEDSQYIHQRV	ELDMLEDsQYIHQRV	0	33.7	33.7	33.7
	PICH	S859	SPGQEAPSENLGSFH	SPGQEAPsENLGSFH	0	35.63;24.3;30.65;47.16	47.16	24.3
	PICH	S864	APSENLGSFHYLPRE	APSENLGsFHYLPRE	0	40.19;44.73;29.02	44.73	29.02
	PICH	S876	PRESSKASLGPNLDL	PRESSKAsLGPNLDL	0	69.37;20.95	69.37	20.95
	PICH	S886	PNLDLQDSVVLYHRS	PNLDLQDsVVLYHRS	0	58.55	58.55	58.55
	PICH	S989	AANSRAKSALTLSLD	AANSRAKsALTLSLD	0	46.24;84.61;44.73	84.61	44.73
	PICH	T992	SRAKSALTLSLDSSP	SRAKSALtLSLDSSP	0	51	51	51
	PICH	S994	AKSALTLSLDSSPKS	AKSALTLsLDSSPKS	1	42.65;34.46	42.65	34.46
	PICH	S1001	SLDSSPKSDEESEVI	SLDSSPKsDEESEVI	1	26.79	26.79	26.79
	PICH	S1021	SKTRRILSDDEDEDE	SKTRRILsDDEDEDE	1	1000;1000;1000;1000;1000;1000;1000;1000;1000;1000;1000;1000;1000;1000;1000;1000;1000;1000;1000;1000;1000;1000;1000;1000;1000;1000;1000;1000;1000;1000;1000	1000	1000
	PICH	T1037	DAFKGSHTNSINISP	DAFKGSHtNSINISP	0	14.49	14.49	14.49
	PICH	S1039	FKGSHTNSINISPFP	FKGSHTNsINISPFP	0	99.77	99.77	99.77
	PICH	S1043	HTNSINISPFPFSSV	HTNSINIsPFPFSSV	1	87.16;74.33;104.45	104.45	74.33
	PICH	T1057	VKQFDASTPQSGSNP	VKQFDAStPQSGSNP	0	16.22;20.91;16.22	20.91	16.22
	PICH	S1060	FDASTPQSGSNPSRR	FDASTPQsGSNPSRR	0	13.27	13.27	13.27
	PICH	S1092	RSLASRRSLINVVLD	RSLASRRsLINVVLD	0	1000;1000;1000;1000;1000	1000	1000
	PICH	S1233	EVMLMTLSLYKQLNI	EVMLMTLsLYKQLNI	0	26.53;52.75	52.75	26.53
	*Note: HeLa cells arrested in mitosis with Nocodazole 100 µg/ml for 18 hours + 250nM BI4834 for 2 hours - not enough coverage for BTR or PICH with BI, failure to identify dependent on PLK1
	5, Malik R, et al. (2009) Quantitative analysis of the human spindle phosphoproteome at distinct mitotic stages. J Proteome Res 8, 4553-63
	HeLa cells were synchronised with STB (2mM), 7 hours release and arrested with 25µM noscapine for 9hours + shake-off,
	Table S1. Identified Phosphorylation Sites and Phosphoproteins,
	Protein Descriptions	Position	Mascot Score	Phospho_STY (STY) Probabilities	Sequence Window (pS/T in the middle)
	BLM	S48	34.08	TSSDNNVS(0.999)VT(0.001)NVSVAK	SSDNNVSVTNVSV
	BLM	T125	25.88	EVVCTTQNT(0.953)PT(0.047)VK	VCTTQNTPTVKKS
	BLM	S282	50.28	NLEEAELHS(0.94)T(0.06)EK	EEAELHSTEKVPC
	BLM	S539	44.3	HTAS(1)INDLER	QNKHTASINDLER
	BLM	S358	28.96	MSMQELNPET(0.002)S(0.955)T(0.043)DCDAR	ELNPETSTDCDAR
	BLM	T359	28.96	MSMQELNPET(0.018)S(0.124)T(0.858)DCDAR	LNPETSTDCDARQ
	BLM	S601	31.96	SVSERLS(0.996)S(0.004)AK	SVSERLSSAKTDC
	PICH	S810	31.19	GT(0.003)GS(0.018)ADS(0.962)IAT(0.018)LPK	GTGSADSIATLPK
	PICH	S774	43.01	MAS(1)VVIDDLPK	ISSKMASVVIDDL
	PICH	S807	31.19	GT(0.012)GS(0.988)ADSIATLPK	DGKGTGSADSIAT
	PICH	S1069	12.37	NDIS(1)PPGR	TPKNDISPPGRFF
	CDK1 Motif	S/T(p)-P (Miller et al, 2008)
	PLK1	D/E-X-S/T(p) (Miller et al, 2008; Nakajima et al, 2003)
	Aurora Kinase A/B	K/R-X-S/T(p) (Miller et al, 2008)
	Table S3. Potential PLK1/AurA,B substrates based on consensus sequences					*Note: 0 min -15 min late promet-meta, 60 min late ana-telophase
		Position	Kinase	Sequence Window	Phosphorylated Peptide	Ratio 15/0 min	Ratio 60/0 min
	BLM	358	PLK1	ELNPETSTDCDAR	_M(ox)SM(ox)QELNPETS(ph)TDCDAR_	1.0366	0.39503
	BLM	601	AurA/B	SVSERLSSAKTDC	_SVSERLS(ph)SAK_	0.80559	0.68207
	*In line with other recent SILAC based proteome studies,46-48 we considered quantitative changes above 50% as significant for regulated phosphorylation events. This corresponds to ratios of >1.5 (3/2) and <0.66 (2/3) for up- and downregulation, respectively.
	Table S5. The four phosphorylation site clusters can mainly be classified according to strong (cluster 1) or modest (cluster 2) downregulation and weak (cluster 3) or pronounced (cluster 4) upregulation in late mitosis (60 min time point).
	Distribution of phosphorylation sites corresponding to kinase consensus motifs in these clusters: Cdk1 consensus phosphorylation sites are enriched in cluster 1, whereas Aurora and Plk1 consensus sites are more evenly distributed, with a modest enrichment in clusters 2 and 3, respectively.
	Protein Name	Position	Cluster (Kinase)	Sequence Window	Phosphorylated Peptide	Ratio 15/0 min	Ratio 60/0 min
	BLM	48	Cluster 1, CDK1	SSDNNVSVTNVSV	_TSSDNNVS(ph)VTNVSVAK_	0.77728	0.32214
	BLM	125	Cluster 1, CDK1	VCTTQNTPTVKKS	_EVVCTTQNT(ph)PTVK_	0.60737	0.24111
	BLM	282	Cluster 1, CDK1	EEAELHSTEKVPC	_NLEEAELHS(ph)TEK_	0.83344	0.34544
	BLM	358	Cluster 1, CDK1	ELNPETSTDCDAR	_M(ox)SM(ox)QELNPETS(ph)TDCDAR_	1.0366	0.39503
	BLM	359	Cluster 1, CDK1	LNPETSTDCDARQ	_M(ox)SM(ox)QELNPETST(ph)DCDAR_	1.1069	0.39516
	BLM	539	Cluster 1, CDK1	QNKHTASINDLER	_HTAS(ph)INDLER_	1.0678	0.20269
	BLM	601	Cluster 2/3 (AurA/B)	SVSERLSSAKTDC	_SVSERLS(ph)SAK_	0.80559	0.68207
	PICH	774	Cluster 1, CDK1	ISSKMASVVIDDL	_M(ox)AS(ph)VVIDDLPK_	0.6975	0.35198
	PICH	807	Cluster 2/3	DGKGTGSADSIAT	_GTGS(ph)ADSIATLPK_	0.79329	0.72252
	PICH	810	Cluster 1, CDK1	GTGSADSIATLPK	_GTGSADS(ph)IATLPK_	0.54285	0.3978
	PICH	1069	Cluster 2/3	TPKNDISPPGRFF	_NDIS(ph)PPGR_	0.96225	1.272
	11, Nousiainen M, et al. (2006) Phosphoproteome analysis of the human mitotic spindle. Proc Natl Acad Sci U S A 103, 5391-6
	Cdk1: pS/pT-P
	PLK1: D/E-X-pS/pT
	Aurora-A, Aurora-B: R/K-R/K-X-pS/pT
	HeLa S3 cells were synchronized in mitosis by using a sequential aphidicolin block􏰡release, nocodazole block protocol.
	Table S4, Phosphorylation sites detected from a human mitotic spindle preparation
		phosphosite(s)	phosphopeptide
	BLM	S419, S422	L410-R429
	3. Olsen JV, et al. (2010) Quantitative phosphoproteomics reveals widespread full phosphorylation site occupancy during mitosis. Sci Signal 3, ra3
	HeLa cells syhnchronised with STB + release 7.5 hours + nocodazole arrest for 16 hours,
	Table S1. List of all identified proteins
	Gene Names	Phospho (STY) Site Positions		Prosite	Prosite Name	SMART	SMART Name	Phospho Motifs
	BLM	28;328;336;337;338;412;419;422;460;462;464;539;696;699;706;714;728;729;735;1310		PS00690;PS51192;PS51194;PS50967	DEAH_ATP_HELICASE;HELICASE_ATP_BIND_1;HELICASE_CTER;HRDC	SM00487;SM00490;SM00341	DEXDc;HELICc;HRDC	NEK6;CK1;GSK3;PLK1;PKD;CHK1;CK2;CDK2;ERK/MAPK;CDK1;FHA1 Rad53p
	PICH	14;805;807;810;813;995;1069;1076;1077;1082;1188		PS51192;PS51194;PS50293	HELICASE_ATP_BIND_1;HELICASE_CTER;TPR_REGION	SM00487;SM00490	DEXDc;HELICc	CAMK2;GSK3;CK1;ERK/MAPK;NEK6;FHA KAPP
	Table S2. List of all identified phosphopeptides
		Phosphosite position in protein	Ratio M/L Normalized by Protein Noco45 - Log2 mitosis	P-site Loc. Prob.	PTM Delta Score (Difference between highest scoring site and second highest)	Sequence Window	Kinase Motif(s)	Best Mascot Score	PTM Score	Phospho (STY) Probabilities	Dephoure, PNAS2008?	Daub et al, Mol Cell 2008?	Phospho.ELM?
	BLM	S28	2.13442	0.999999	61.351	NNKLSLSKPKFSG	NEK6	34.66	84.57	LSLS(1)KPK	NO	NO	NO
	BLM	S168	7.89124	1	63.6347	TSETSKSFVTPPQ		30.76	74.039	S(1)FVT(1)PPQSHFVR	NO	NO	NO
	BLM	T337	4.0148	0.763341	8.09626	KEDVLSTSKDLLS	FHA1 Rad53p	17.36	35.935	EDVLS(0.118)T(0.763)S(0.118)K	NO	NO	NO
	BLM	S338	7.43179	0.981109	17.3083	EDVLSTSKDLLSK	NEK6	25.37	119.22	DLDT(0.071)S(0.929)DRKEDVLST(0.018)S(0.981)K	NO	NO	NO
	BLM	T412	6.97028	0.859807	6.3127	IRRKLLTEVDFNK	FHA1 Rad53p	50.77	193.6	LLT(0.86)EVDFNKS(0.597)DAS(0.489)LLGS(0.054)LWR	YES	NO	NO
	BLM	S419	6.97028	1	125.358	EVDFNKSDASLLG		62.75	178.44	S(1)DAS(1)LLGSLWR	NO	NO	YES
	BLM	S422	6.97028	0.998489	28.2008	FNKSDASLLGSLW	CK1;GSK3;PLK1	62.75	178.44	SDAS(0.998)LLGS(0.002)LWR	YES	NO	YES
	BLM	S426	6.97028	0.999995	52.5727	DASLLGSLWRYRP	CK1;NEK6	62.75	178.44	LLT(0.006)EVDFNKS(0.995)DAS(0.999)LLGS(1)LWR	NO	NO	NO
	BLM	S464	15.5066	0.737677	8.06667	LPSNSVSPGDCLL	CK1	49.3	64.501	ELNFS(0.201)HLPS(0.256)NS(0.596)VS(0.738)PGDCLLT(0.087)T(0.074)T(0.049)LGK	NO	NO	NO
	BLM	S539	0	0.999951	43.0927	QNKHTASINDLER		25.97	84.823	HTAS(1)INDLER	NO	NO	NO
	BLM	S1296	0	0.970383	18.1856	SPAEDSSPGISLS	GSK3;Polo box	47.78	114.2	YSEWTSPAEDS(0.015)S(0.97)PGIS(0.015)LSSSR	NO	NO	YES
	BLM	S1310	1.70315	0.999906	43.1289	SRGPGRSAAEELD	CK2	20.48	56.062	S(1)AAEELDEEIPVSSHYFASK	YES	NO	NO
	PICH	S14	2.34437	1	157.288	PEAEALSPEQAAH		70.52	180.02	RFPEAEALS(1)PEQAAHYLR	NO	YES	NO
	PICH	T805	2.93793	0.898863	8.84242	LQDGKGTGSADSI	FHA KAPP	16.28	98.456	GT(0.899)GS(0.682)ADS(0.369)IAT(0.05)LPK	NO	YES	NO
	PICH	S807	2.81738	0.999938	42.046	DGKGTGSADSIAT		46.93	179.32	GTGS(1)ADS(1)IATLPK	YES	YES	NO
	PICH	S810	2.81738	0.999964	44.4255	GTGSADSIATLPK	CK1	46.93	179.32	GTGS(1)ADS(1)IATLPK	YES	YES	NO
	PICH	T813	2.93793	0.966355	15.0678	SADSIATLPKGFG	CK1	16.28	98.456	GT(0.741)GS(0.251)ADS(0.041)IAT(0.966)LPK	YES	NO	NO
	PICH	S995	4.66038	1	60.6703	RAGFVHSKTCLSW		38.2	97.769	AGFVHS(1)K	NO	YES	NO
	PICH	S1028	0	1	182.703	KARRIVSDGEDED	CAMK2;CK2	83.68	211.62	IVS(1)DGEDEDDSFK	YES	YES	NO
	PICH	S1069	0	1	35.9345	TPKNDISPPGRFF		11.73	65.094	NDIS(1)PPGR	YES	YES	NO
	PICH	S1082	3.52419	0.995467	23.4165	SSQIPSSVNKSMN	GSK3	23.25	127.93	FFSSQIPS(0.005)S(0.995)VNK	NO	NO	NO
	PICH	S1188	2.90893	0.795747	5.90631	GEQLVGSPQDKAA	ERK/MAPK;NEK6	26.86	63.652	PSALAQETSLGAPEPLS(0.204)GEQLVGS(0.796)PQDK	NO	YES	NO
	RMI1	S225	6.89178	0.999998	56.5737	SVIPNNSNENIPR		22.35	74.568	LIGEPDLVVSVIPNNS(1)NENIPR	YES	NO	NO
	RMI1	S226	6.89178	0.999998	56.5737	SVIPNNSNENIPR		22.35	74.568	LIGEPDLVVSVIPNNS(1)NENIPR	YES	NO	NO
	Table S7. List of regulated mitotic phosphorylation sites with high occupancy (Excel file).
		pAA	Ratio M/L Normalized by Protein Noco45 - Log2 mitosis	P-site Loc. Prob.	PTM Delta Score (Difference between highest scoring site and second highest)	Sequence Window	Kinase Motif(s)	Best Mascot Score	PTM Score	Phospho (STY) Probabilities	Dephoure, PNAS2008?
	BLM	S419	6.97028	1	125.358	EVDFNKSDASLLG		62.75	178.44	S(1)DAS(1)LLGSLWR	NO
	BLM	S422	6.97028	0.998489	28.2008	FNKSDASLLGSLW	CK1;GSK3;PLK1	62.75	178.44	SDAS(0.998)LLGS(0.002)LWR	YES
	BLM	S464	15.5066	0.737677	8.06667	LPSNSVSPGDCLL	CK1	49.3	64.501	ELNFS(0.201)HLPS(0.256)NS(0.596)VS(0.738)PGDCLLT(0.087)T(0.074)T(0.049)LGK	NO
	RMI1	S225	6.89178	0.999998	56.5737	SVIPNNSNENIPR		22.35	74.568	LIGEPDLVVSVIPNNS(1)NENIPR	YES
	Phopshosite plus > Comparative Site Search > Treatment
